# Supplementary material for: An Exhaustive Exploration of the Semaglutide-GLP-1R Sequence Space towards the Design of Semaglutide Analogues with Elevated Binding Affinity to GLP-1R
Source: Preprints.org preprint supplement (doi:10.20944/preprints202405.0258.v1), 2024-05-06
Supplement: Supplementary file 1 [file supplementary]

# An exhaustive exploration of the semaglutide-GLP-1R sequence space towards the design of semaglutide analogues with elevated binding affinity to GLP-1R: supplementary information

Wei Li \*<sup>1</sup>

<sup>1</sup> Contrebola Institute of Computational Interstructural Biophysics, No. 88, Renaissance East Road, Nantong City 226000, Jiangsu Province, People's Republic of China

\* Correspondence: wli148@aucklanduni.ac.nz

Received: May 4, 2024; Accepted: date; Published: date

**Abstract:** Semaglutide is a potent GLP-1 receptor agonist used in the treatment of type 2 diabetes mellitus due to its ability to regulate blood glucose levels and promote weight loss. On July 26, 2021, with a manually defined set of computational structural and biophysical analysis, a simple Val27-Arg28 exchange was for the first time introduced in the backbone of semaglutide to strengthen the semaglutide-GLP-1R binding affinity. In this article, a comprehensive structural and biophysical analysis approach is for the first time proposed towards an exhaustive exploration of the semaglutide-GLP-1R sequence space for the design of semaglutide analogues with elevated binding affinity to GLP-1R, thereby potentially enhancing therapeutic efficacy of structurally conceivable semaglutide analogues. Through structure biophysics-based rational design and computational modeling, this article puts forward a set of semaglutide analogues and calculated their binding affinities to GLP-1R, with one particular semaglutide analogue-GLP-1R structural model reaching a  $K_d$  of  $3.0 \times 10^{-8}$  M, while the  $K_d$  is  $3.4 \times 10^{-6}$  M for the binding of native semaglutide to GLP-1. Overall, the computationally designed semaglutide analogues here constitute a hopeful approach for developing GLP-1 receptor agonists with improved efficacy for the treatment of diabetes and weight management in future.

**Keywords:** Semaglutide; GLP-1R; semaglutide-GLP-1R sequence space; binding affinity;  $K_d$

---

Supplementary information

| No. | Muta1  | Muta2  | Muta3  | Muta4  | Min     | Max     | Mean      | Std       |
|-----|--------|--------|--------|--------|---------|---------|-----------|-----------|
| 1   | G13B_A | I20B_Q | L23B_Q | V24B_N | 5.3E-08 | 2.2E-07 | 1.337E-07 | 4.778E-08 |
| 2   | G13B_A | I20B_N | L23B_R | V24B_N | 6.5E-08 | 2.4E-07 | 1.344E-07 | 4.996E-08 |
| 3   | G13B_A | I20B_N | L23B_Q | V24B_T | 6.6E-08 | 2.2E-07 | 1.376E-07 | 4.199E-08 |
| 4   | G13B_A | I20B_T | L23B_Q | V24B_N | 8.0E-08 | 3.1E-07 | 1.404E-07 | 5.478E-08 |
| 5   | G13B_A | I20B_Q | L23B_Q | V24B_T | 6.8E-08 | 2.0E-07 | 1.407E-07 | 3.779E-08 |
| 6   | G13B_A | I20B_S | L23B_R | V24B_T | 6.1E-08 | 2.5E-07 | 1.408E-07 | 5.527E-08 |
| 7   | G13B_A | I20B_Q | L23B_R | V24B_N | 3.0E-08 | 3.2E-07 | 1.461E-07 | 7.095E-08 |
| 8   | G13B_A | I20B_T | L23B_R | V24B_N | 8.3E-08 | 2.1E-07 | 1.467E-07 | 3.690E-08 |
| 9   | G13B_A | I20B_N | L23B_R | V24B_Q | 6.3E-08 | 2.9E-07 | 1.487E-07 | 5.848E-08 |
| 10  | G13B_A | I20B_Q | L23B_R | V24B_Q | 8.6E-08 | 2.5E-07 | 1.489E-07 | 5.170E-08 |
| 11  | G13B_A | I20B_Q | L23B_Q | V24B_Q | 6.3E-08 | 2.4E-07 | 1.505E-07 | 5.269E-08 |
| 12  | G13B_A | I20B_S | L23B_R | V24B_N | 4.4E-08 | 3.5E-07 | 1.520E-07 | 6.568E-08 |
| 13  | G13B_A | I20B_T | L23B_R | V24B_T | 9.4E-08 | 2.2E-07 | 1.545E-07 | 4.188E-08 |
| 14  | G13B_A | I20B_N | L23B_Q | V24B_N | 7.7E-08 | 2.2E-07 | 1.559E-07 | 4.164E-08 |
| 15  | G13B_A | I20B_S | L23B_R | V24B_Q | 7.7E-08 | 3.0E-07 | 1.571E-07 | 6.401E-08 |
| 16  | G13B_A | I20B_S | F19B_Q | V24B_N | 3.5E-08 | 2.8E-07 | 1.583E-07 | 6.648E-08 |
| 17  | G13B_A | I20B_N | L23B_Q | V24B_Q | 8.2E-08 | 2.9E-07 | 1.602E-07 | 5.879E-08 |
| 18  | G13B_A | I20B_N | F19B_Q | V24B_N | 5.0E-08 | 2.9E-07 | 1.634E-07 | 7.035E-08 |
| 19  | G13B_A | I20B_T | F19B_Q | V24B_Q | 9.7E-08 | 2.9E-07 | 1.653E-07 | 4.839E-08 |
| 20  | G13B_A | I20B_N | L23B_R | V24B_T | 8.0E-08 | 3.4E-07 | 1.662E-07 | 8.233E-08 |
| 21  | G13B_A | I20B_S | L23B_Q | V24B_Q | 7.8E-08 | 3.4E-07 | 1.682E-07 | 7.062E-08 |
| 22  | G13B_A | I20B_Q | F19B_Q | V24B_T | 3.6E-08 | 3.3E-07 | 1.686E-07 | 7.653E-08 |
| 23  | G13B_A | I20B_S | L23B_Q | V24B_N | 6.2E-08 | 3.0E-07 | 1.703E-07 | 6.652E-08 |
| 24  | G13B_A | E18B_T | I20B_Q | V24B_Q | 8.4E-08 | 2.7E-07 | 1.706E-07 | 5.558E-08 |
| 25  | G13B_A | I20B_T | F19B_Q | V24B_N | 6.3E-08 | 2.9E-07 | 1.711E-07 | 7.268E-08 |
| 26  | Y10B_A | I20B_Q | L23B_Q | V24B_Q | 7.3E-08 | 3.8E-07 | 1.725E-07 | 8.816E-08 |
| 27  | G13B_A | I20B_S | F19B_Q | V24B_T | 6.2E-08 | 3.2E-07 | 1.725E-07 | 6.884E-08 |
| 28  | G13B_A | I20B_T | L23B_R | V24B_Q | 5.5E-08 | 3.0E-07 | 1.725E-07 | 6.902E-08 |
| 29  | G13B_A | I20B_T | F19B_Q | V24B_T | 6.5E-08 | 3.3E-07 | 1.765E-07 | 7.216E-08 |
| 30  | G13B_A | I20B_T | L23B_Q | V24B_T | 9.2E-08 | 3.4E-07 | 1.765E-07 | 7.525E-08 |
| 31  | G13B_A | I20B_Q | L23B_R | V24B_T | 8.3E-08 | 3.7E-07 | 1.778E-07 | 7.613E-08 |
| 32  | G13B_A | I20B_S | L23B_Q | V24B_T | 7.8E-08 | 3.6E-07 | 1.785E-07 | 6.839E-08 |
| 33  | G13B_A | I20B_T | L23B_Q | V24B_Q | 9.1E-08 | 2.9E-07 | 1.791E-07 | 4.888E-08 |
| 34  | G13B_A | I20B_Q | K17B_S | V24B_N | 7.5E-08 | 2.9E-07 | 1.822E-07 | 7.042E-08 |
| 35  | G13B_A | I20B_Q | K17B_S | V24B_T | 8.2E-08 | 2.9E-07 | 1.826E-07 | 5.543E-08 |
| 36  | G13B_A | I20B_Q | S9B_A  | V24B_N | 7.7E-08 | 3.5E-07 | 1.836E-07 | 6.655E-08 |
| 37  | G13B_A | E18B_T | I20B_Q | V24B_N | 9.5E-08 | 2.7E-07 | 1.842E-07 | 5.523E-08 |
| 38  | Y10B_A | I20B_Q | L23B_R | V24B_N | 8.1E-08 | 4.7E-07 | 1.851E-07 | 9.983E-08 |
| 39  | G13B_A | I20B_Q | F19B_Q | V24B_N | 6.0E-08 | 3.1E-07 | 1.869E-07 | 6.942E-08 |
| 40  | G13B_A | I20B_Q | F19B_Q | V24B_Q | 7.3E-08 | 3.4E-07 | 1.870E-07 | 7.308E-08 |
| 41  | Y10B_A | I20B_N | L23B_R | V24B_Q | 8.9E-08 | 3.7E-07 | 1.890E-07 | 7.203E-08 |
| 42  | G13B_A | I20B_Q | S9B_A  | V24B_T | 9.1E-08 | 3.6E-07 | 1.895E-07 | 7.000E-08 |
| 43  | G13B_A | I20B_Q | S9B_A  | L23B_R | 8.6E-08 | 4.6E-07 | 1.900E-07 | 8.860E-08 |
| 44  | G13B_A | I20B_N | F19B_Q | V24B_Q | 6.8E-08 | 3.4E-07 | 1.909E-07 | 6.762E-08 |
| 45  | G13B_A | I20B_S | F19B_Q | V24B_Q | 8.8E-08 | 3.5E-07 | 1.926E-07 | 7.739E-08 |
| 46  | Y10B_A | I20B_Q | L23B_R | V24B_T | 9.9E-08 | 3.5E-07 | 1.934E-07 | 7.962E-08 |
| 47  | Y10B_A | I20B_Q | L23B_R | V24B_Q | 6.6E-08 | 3.3E-07 | 1.951E-07 | 7.414E-08 |
| 48  | G13B_A | I20B_Q | K17B_S | V24B_Q | 8.3E-08 | 3.6E-07 | 1.962E-07 | 6.561E-08 |
| 49  | Y10B_A | I20B_T | L23B_R | V24B_T | 1.1E-07 | 3.4E-07 | 1.970E-07 | 6.689E-08 |
| 50  | G13B_A | I20B_T | K17B_S | V24B_N | 1.1E-07 | 3.0E-07 | 1.975E-07 | 5.524E-08 |
| 51  | Y10B_A | I20B_N | L23B_Q | V24B_N | 8.3E-08 | 3.4E-07 | 1.976E-07 | 6.715E-08 |

|     |        |        |        |        |         |         |           |           |
|-----|--------|--------|--------|--------|---------|---------|-----------|-----------|
| 52  | Y10B_A | I20B_N | L23B_R | V24B_T | 1.1E-07 | 3.5E-07 | 1.985E-07 | 6.784E-08 |
| 53  | G13B_A | I20B_Q | S9B_A  | V24B_Q | 9.0E-08 | 3.0E-07 | 1.985E-07 | 6.548E-08 |
| 54  | G13B_A | I20B_S | F19B_Q | L23B_R | 1.2E-07 | 3.1E-07 | 1.990E-07 | 5.077E-08 |
| 55  | G13B_A | I20B_N | K17B_S | V24B_N | 1.2E-07 | 4.4E-07 | 2.015E-07 | 7.264E-08 |
| 56  | G13B_A | I20B_S | F19B_Q | L23B_Q | 7.7E-08 | 4.1E-07 | 2.023E-07 | 9.647E-08 |
| 57  | G13B_A | I20B_S | L23B_R | K17B_S | 1.1E-07 | 2.8E-07 | 2.030E-07 | 4.736E-08 |
| 58  | Y10B_A | I20B_T | L23B_R | V24B_N | 8.9E-08 | 4.4E-07 | 2.034E-07 | 7.708E-08 |
| 59  | G13B_A | I20B_N | K17B_S | V24B_Q | 1.0E-07 | 5.2E-07 | 2.035E-07 | 8.707E-08 |
| 60  | Y10B_A | I20B_S | L23B_R | V24B_T | 8.6E-08 | 3.5E-07 | 2.038E-07 | 7.595E-08 |
| 61  | G13B_A | I20B_N | S9B_A  | L23B_R | 1.2E-07 | 3.8E-07 | 2.050E-07 | 8.300E-08 |
| 62  | G13B_A | I20B_N | F19B_Q | V24B_T | 8.4E-08 | 4.1E-07 | 2.067E-07 | 7.351E-08 |
| 63  | G13B_A | I20B_N | L23B_R | K17B_S | 1.1E-07 | 3.8E-07 | 2.070E-07 | 8.228E-08 |
| 64  | G13B_A | E18B_T | I20B_Q | L23B_Q | 1.1E-07 | 3.4E-07 | 2.080E-07 | 7.317E-08 |
| 65  | G13B_A | I20B_N | L23B_Q | K17B_S | 1.1E-07 | 3.6E-07 | 2.080E-07 | 7.557E-08 |
| 66  | G13B_A | I20B_T | F19B_Q | L23B_R | 6.7E-08 | 3.5E-07 | 2.097E-07 | 9.136E-08 |
| 67  | G13B_A | I20B_S | K17B_S | V24B_N | 8.6E-08 | 3.6E-07 | 2.098E-07 | 7.261E-08 |
| 68  | Y10B_A | I20B_N | F19B_Q | V24B_Q | 7.6E-08 | 3.9E-07 | 2.098E-07 | 8.400E-08 |
| 69  | Y10B_A | I20B_N | L23B_R | V24B_N | 1.1E-07 | 3.4E-07 | 2.100E-07 | 6.696E-08 |
| 70  | G13B_A | I20B_T | S9B_A  | L23B_R | 8.9E-08 | 3.8E-07 | 2.104E-07 | 7.158E-08 |
| 71  | Y10B_A | I20B_T | L23B_R | V24B_Q | 1.2E-07 | 3.2E-07 | 2.105E-07 | 5.698E-08 |
| 72  | G13B_A | I20B_Q | L23B_R | K17B_S | 8.2E-08 | 7.9E-07 | 2.120E-07 | 1.610E-07 |
| 73  | G13B_A | I20B_T | K17B_S | V24B_Q | 9.2E-08 | 4.2E-07 | 2.121E-07 | 7.875E-08 |
| 74  | G13B_A | I20B_N | E18B_T | V24B_N | 1.3E-07 | 3.8E-07 | 2.125E-07 | 7.181E-08 |
| 75  | G13B_A | I20B_T | L23B_R | K17B_S | 9.5E-08 | 4.5E-07 | 2.128E-07 | 9.408E-08 |
| 76  | G13B_A | E18B_T | I20B_S | V24B_T | 1.0E-07 | 3.5E-07 | 2.135E-07 | 7.081E-08 |
| 77  | G13B_A | I20B_Q | F19B_W | V24B_Q | 8.9E-08 | 3.9E-07 | 2.149E-07 | 8.920E-08 |
| 78  | Y10B_A | I20B_Q | L23B_Q | V24B_N | 6.7E-08 | 4.5E-07 | 2.161E-07 | 1.064E-07 |
| 79  | Y10B_A | I20B_N | L23B_Q | V24B_Q | 9.7E-08 | 3.3E-07 | 2.168E-07 | 5.626E-08 |
| 80  | G13B_A | I20B_N | E18B_T | L23B_R | 1.1E-07 | 4.0E-07 | 2.175E-07 | 9.118E-08 |
| 81  | G13B_A | I20B_Q | V24B_Q | E12B_A | 1.0E-07 | 3.9E-07 | 2.175E-07 | 8.175E-08 |
| 82  | Y10B_A | I20B_S | L23B_Q | V24B_Q | 8.7E-08 | 3.4E-07 | 2.179E-07 | 7.437E-08 |
| 83  | G13B_A | I20B_N | F19B_Q | L23B_R | 8.9E-08 | 4.4E-07 | 2.179E-07 | 9.986E-08 |
| 84  | Y10B_A | I20B_Q | K17B_S | V24B_T | 1.1E-07 | 4.0E-07 | 2.195E-07 | 7.970E-08 |
| 85  | G13B_A | I20B_S | S9B_A  | V24B_Q | 9.9E-08 | 3.2E-07 | 2.199E-07 | 5.489E-08 |
| 86  | G13B_A | I20B_Q | L23B_Q | K17B_S | 7.5E-08 | 3.6E-07 | 2.208E-07 | 7.533E-08 |
| 87  | Y10B_A | I20B_T | L23B_Q | V24B_N | 1.0E-07 | 4.7E-07 | 2.210E-07 | 9.037E-08 |
| 88  | Y10B_A | I20B_Q | F19B_Q | V24B_N | 6.8E-08 | 5.7E-07 | 2.218E-07 | 1.294E-07 |
| 89  | G13B_A | I20B_S | F19B_W | V24B_N | 1.3E-07 | 3.7E-07 | 2.225E-07 | 7.376E-08 |
| 90  | Y10B_A | I20B_Q | F19B_Q | V24B_Q | 9.9E-08 | 4.3E-07 | 2.244E-07 | 8.656E-08 |
| 91  | G13B_A | E18B_T | I20B_Q | L23B_R | 8.6E-08 | 3.9E-07 | 2.248E-07 | 9.776E-08 |
| 92  | G13B_A | I20B_T | S9B_A  | V24B_Q | 1.4E-07 | 3.7E-07 | 2.250E-07 | 6.653E-08 |
| 93  | Y10B_A | I20B_S | L23B_R | V24B_N | 1.4E-07 | 3.5E-07 | 2.260E-07 | 6.344E-08 |
| 94  | G13B_A | I20B_T | F19B_Q | L23B_Q | 6.0E-08 | 4.6E-07 | 2.263E-07 | 1.111E-07 |
| 95  | G13B_A | I20B_N | E18B_T | V24B_Q | 1.0E-07 | 4.0E-07 | 2.265E-07 | 7.700E-08 |
| 96  | Y10B_A | I20B_Q | F19B_Q | V24B_T | 8.5E-08 | 3.2E-07 | 2.267E-07 | 6.989E-08 |
| 97  | Y10B_A | I20B_T | L23B_Q | V24B_Q | 9.6E-08 | 4.5E-07 | 2.268E-07 | 9.045E-08 |
| 98  | G13B_A | I20B_N | E18B_T | V24B_T | 1.2E-07 | 4.4E-07 | 2.270E-07 | 8.572E-08 |
| 99  | G13B_A | E18B_T | I20B_T | L23B_Q | 1.0E-07 | 4.9E-07 | 2.270E-07 | 1.064E-07 |
| 100 | Y10B_A | I20B_N | F19B_Q | V24B_N | 9.0E-08 | 4.4E-07 | 2.277E-07 | 9.537E-08 |
| 101 | G13B_A | E18B_T | I20B_Q | V24B_T | 9.4E-08 | 6.6E-07 | 2.277E-07 | 1.403E-07 |
| 102 | G13B_A | I20B_N | V24B_T | E12B_A | 1.0E-07 | 4.0E-07 | 2.280E-07 | 7.281E-08 |
| 103 | G13B_A | E18B_T | I20B_T | V24B_T | 1.4E-07 | 3.7E-07 | 2.280E-07 | 6.152E-08 |

|     |        |        |        |        |         |         |           |           |
|-----|--------|--------|--------|--------|---------|---------|-----------|-----------|
| 104 | G13B_A | I20B_T | S9B_A  | L23B_Q | 7.1E-08 | 4.3E-07 | 2.285E-07 | 9.748E-08 |
| 105 | G13B_A | I20B_T | S9B_A  | V24B_N | 9.9E-08 | 4.6E-07 | 2.305E-07 | 7.913E-08 |
| 106 | Y10B_A | I20B_Q | K17B_S | V24B_Q | 8.5E-08 | 3.8E-07 | 2.306E-07 | 8.079E-08 |
| 107 | G13B_A | I20B_T | L23B_Q | K17B_S | 6.4E-08 | 4.0E-07 | 2.312E-07 | 8.367E-08 |
| 108 | G13B_A | I20B_T | F19B_W | V24B_T | 1.3E-07 | 4.1E-07 | 2.315E-07 | 8.229E-08 |
| 109 | G13B_A | I20B_Q | S9B_A  | L23B_Q | 4.9E-08 | 3.8E-07 | 2.319E-07 | 9.947E-08 |
| 110 | G13B_A | I20B_S | S9B_A  | V24B_N | 1.3E-07 | 5.1E-07 | 2.320E-07 | 8.389E-08 |
| 111 | Y10B_A | I20B_Q | S9B_A  | V24B_Q | 1.1E-07 | 4.0E-07 | 2.325E-07 | 7.232E-08 |
| 112 | Y10B_A | I20B_S | L23B_Q | V24B_N | 8.3E-08 | 5.8E-07 | 2.329E-07 | 1.156E-07 |
| 113 | G13B_A | I20B_S | S9B_A  | L23B_R | 1.2E-07 | 4.1E-07 | 2.330E-07 | 7.270E-08 |
| 114 | G13B_A | E18B_T | I20B_T | V24B_N | 1.2E-07 | 3.7E-07 | 2.340E-07 | 5.195E-08 |
| 115 | Y10B_A | I20B_S | L23B_R | V24B_Q | 1.1E-07 | 4.4E-07 | 2.340E-07 | 7.850E-08 |
| 116 | G13B_A | I20B_Q | F19B_W | V24B_N | 8.9E-08 | 4.8E-07 | 2.344E-07 | 9.531E-08 |
| 117 | G13B_A | I20B_N | K17B_S | V24B_T | 1.1E-07 | 4.2E-07 | 2.345E-07 | 8.959E-08 |
| 118 | G13B_A | E18B_T | I20B_S | V24B_Q | 1.1E-07 | 4.6E-07 | 2.345E-07 | 1.064E-07 |
| 119 | G13B_A | I20B_S | L23B_Q | K17B_S | 1.0E-07 | 5.5E-07 | 2.355E-07 | 9.886E-08 |
| 120 | G13B_A | I20B_T | K17B_S | V24B_T | 1.3E-07 | 3.7E-07 | 2.355E-07 | 6.186E-08 |
| 121 | G13B_A | I20B_N | F19B_W | V24B_N | 1.0E-07 | 4.0E-07 | 2.375E-07 | 8.783E-08 |
| 122 | G13B_A | I20B_Q | F19B_Q | L23B_Q | 6.3E-08 | 6.0E-07 | 2.377E-07 | 1.406E-07 |
| 123 | G13B_A | I20B_S | E12B_A | V24B_N | 8.6E-08 | 4.8E-07 | 2.377E-07 | 9.589E-08 |
| 124 | G13B_A | I20B_T | E12B_A | V24B_N | 1.3E-07 | 4.0E-07 | 2.380E-07 | 6.429E-08 |
| 125 | G13B_A | I20B_Q | E12B_A | V24B_N | 8.3E-08 | 4.0E-07 | 2.381E-07 | 8.334E-08 |
| 126 | Y10B_A | I20B_Q | F19B_Q | L23B_Q | 5.7E-08 | 7.1E-07 | 2.390E-07 | 1.551E-07 |
| 127 | Y10B_A | I20B_N | L23B_Q | V24B_T | 1.2E-07 | 4.5E-07 | 2.390E-07 | 8.091E-08 |
| 128 | G13B_A | E18B_T | I20B_T | L23B_R | 1.0E-07 | 4.0E-07 | 2.395E-07 | 8.211E-08 |
| 129 | S8B_A  | G13B_W | I20B_Q | L23B_R | 1.3E-07 | 3.7E-07 | 2.395E-07 | 7.007E-08 |
| 130 | G13B_A | I20B_T | S9B_A  | V24B_T | 1.5E-07 | 3.7E-07 | 2.400E-07 | 5.525E-08 |
| 131 | G13B_A | I20B_T | F19B_W | V24B_Q | 1.5E-07 | 3.7E-07 | 2.400E-07 | 5.974E-08 |
| 132 | G13B_A | I20B_N | S9B_A  | V24B_Q | 1.5E-07 | 4.2E-07 | 2.400E-07 | 7.130E-08 |
| 133 | Y10B_A | I20B_S | F19B_Q | V24B_Q | 7.6E-08 | 5.4E-07 | 2.403E-07 | 1.229E-07 |
| 134 | G13B_A | I20B_Q | F19B_W | L23B_Q | 1.3E-07 | 4.6E-07 | 2.405E-07 | 7.797E-08 |
| 135 | Y10B_A | I20B_T | F19B_Q | V24B_N | 1.1E-07 | 6.3E-07 | 2.410E-07 | 1.272E-07 |
| 136 | Y10B_A | I20B_S | F19B_Q | V24B_T | 1.1E-07 | 3.6E-07 | 2.410E-07 | 7.867E-08 |
| 137 | G13B_A | I20B_S | V24B_Q | E12B_A | 1.1E-07 | 4.0E-07 | 2.410E-07 | 7.469E-08 |
| 138 | G13B_A | I20B_Q | F19B_Q | L23B_R | 1.1E-07 | 4.9E-07 | 2.410E-07 | 1.061E-07 |
| 139 | Y10B_A | I20B_T | L23B_Q | V24B_T | 1.2E-07 | 4.7E-07 | 2.415E-07 | 9.281E-08 |
| 140 | G13B_A | I20B_S | S9B_A  | L23B_Q | 1.3E-07 | 4.7E-07 | 2.425E-07 | 8.681E-08 |
| 141 | Y10B_A | I20B_Q | K17B_S | V24B_N | 1.2E-07 | 4.7E-07 | 2.425E-07 | 1.120E-07 |
| 142 | Y10B_A | I20B_S | L23B_Q | V24B_T | 1.2E-07 | 5.3E-07 | 2.425E-07 | 1.093E-07 |
| 143 | G13B_A | E18B_T | I20B_S | L23B_Q | 1.2E-07 | 4.2E-07 | 2.425E-07 | 9.147E-08 |
| 144 | G13B_A | I20B_S | K17B_S | V24B_Q | 8.7E-08 | 4.4E-07 | 2.434E-07 | 8.897E-08 |
| 145 | G13B_A | I20B_N | E12B_A | V24B_N | 1.1E-07 | 4.0E-07 | 2.435E-07 | 6.459E-08 |
| 146 | G13B_A | I20B_Q | V24B_T | E12B_A | 1.2E-07 | 4.2E-07 | 2.435E-07 | 9.103E-08 |
| 147 | G13B_A | I20B_S | S9B_A  | V24B_T | 1.4E-07 | 3.4E-07 | 2.440E-07 | 6.621E-08 |
| 148 | G13B_A | I20B_T | F19B_W | V24B_N | 1.3E-07 | 4.1E-07 | 2.445E-07 | 8.420E-08 |
| 149 | G13B_A | I20B_N | F19B_W | L23B_Q | 8.1E-08 | 5.4E-07 | 2.450E-07 | 1.303E-07 |
| 150 | G13B_A | I20B_S | F19B_W | V24B_Q | 1.3E-07 | 5.0E-07 | 2.455E-07 | 9.976E-08 |
| 151 | G13B_A | I20B_N | S9B_A  | V24B_N | 1.2E-07 | 6.0E-07 | 2.455E-07 | 1.049E-07 |
| 152 | Y10B_A | I20B_S | K17B_S | V24B_Q | 1.3E-07 | 4.0E-07 | 2.455E-07 | 6.353E-08 |
| 153 | G13B_A | I20B_N | S9B_A  | L23B_Q | 9.7E-08 | 4.2E-07 | 2.458E-07 | 9.019E-08 |
| 154 | G13B_A | I20B_T | L23B_Q | E12B_A | 1.4E-07 | 4.1E-07 | 2.465E-07 | 6.167E-08 |
| 155 | G13B_A | I20B_T | F19B_Q | K17B_S | 9.1E-08 | 5.2E-07 | 2.475E-07 | 1.125E-07 |

|     |        |        |        |        |         |         |           |           |
|-----|--------|--------|--------|--------|---------|---------|-----------|-----------|
| 156 | G13B_A | E18B_T | I20B_S | V24B_N | 1.4E-07 | 5.5E-07 | 2.475E-07 | 1.014E-07 |
| 157 | Y10B_A | G13B_W | I20B_N | V24B_N | 1.2E-07 | 3.9E-07 | 2.480E-07 | 6.330E-08 |
| 158 | G13B_A | I20B_N | S9B_A  | V24B_T | 1.4E-07 | 3.8E-07 | 2.485E-07 | 6.612E-08 |
| 159 | G13B_A | I20B_S | K17B_S | V24B_T | 1.1E-07 | 7.0E-07 | 2.490E-07 | 1.313E-07 |
| 160 | Y10B_A | I20B_T | F19B_Q | V24B_T | 1.2E-07 | 3.8E-07 | 2.495E-07 | 8.179E-08 |
| 161 | G13B_A | I20B_Q | F19B_W | V24B_T | 1.3E-07 | 5.0E-07 | 2.495E-07 | 9.671E-08 |
| 162 | Y10B_A | I20B_T | K17B_S | V24B_T | 1.4E-07 | 4.7E-07 | 2.505E-07 | 8.192E-08 |
| 163 | Y10B_A | I20B_Q | F19B_Q | K17B_S | 1.3E-07 | 4.7E-07 | 2.515E-07 | 1.083E-07 |
| 164 | Y10B_A | I20B_Q | L23B_Q | V24B_T | 7.1E-08 | 5.2E-07 | 2.515E-07 | 1.226E-07 |
| 165 | G13B_A | I20B_T | V24B_Q | E12B_A | 1.5E-07 | 4.5E-07 | 2.515E-07 | 7.443E-08 |
| 166 | G13B_A | I20B_N | F19B_W | V24B_T | 9.9E-08 | 3.7E-07 | 2.519E-07 | 8.279E-08 |
| 167 | G13B_A | E18B_T | I20B_T | V24B_Q | 1.0E-07 | 4.4E-07 | 2.520E-07 | 9.801E-08 |
| 168 | G13B_A | I20B_Q | F19B_Q | S9B_A  | 1.3E-07 | 4.1E-07 | 2.540E-07 | 8.714E-08 |
| 169 | G13B_A | I20B_Q | L23B_Q | E12B_A | 6.4E-08 | 4.3E-07 | 2.542E-07 | 1.027E-07 |
| 170 | G13B_A | I20B_N | F19B_Q | L23B_Q | 4.3E-08 | 5.2E-07 | 2.542E-07 | 1.105E-07 |
| 171 | G13B_A | A16B_N | I20B_Q | V24B_N | 3.0E-08 | 7.0E-07 | 2.549E-07 | 1.579E-07 |
| 172 | G13B_A | I20B_Q | L23B_R | E12B_A | 8.7E-08 | 5.0E-07 | 2.554E-07 | 1.197E-07 |
| 173 | Y10B_A | I20B_S | F19B_Q | V24B_N | 1.3E-07 | 5.4E-07 | 2.555E-07 | 1.194E-07 |
| 174 | G13B_A | I20B_S | F19B_Q | K17B_S | 8.8E-08 | 5.7E-07 | 2.569E-07 | 1.144E-07 |
| 175 | G13B_A | I20B_S | F19B_Q | S9B_A  | 7.7E-08 | 4.9E-07 | 2.573E-07 | 1.162E-07 |
| 176 | G13B_A | E18B_T | I20B_S | F19B_Q | 7.7E-08 | 6.7E-07 | 2.574E-07 | 1.293E-07 |
| 177 | Y10B_A | I20B_T | F19B_Q | L23B_Q | 1.1E-07 | 4.5E-07 | 2.595E-07 | 8.858E-08 |
| 178 | Y10B_A | E18B_T | I20B_Q | V24B_T | 1.2E-07 | 4.9E-07 | 2.595E-07 | 9.992E-08 |
| 179 | G13B_A | I20B_T | F19B_Q | E12B_A | 9.8E-08 | 5.5E-07 | 2.599E-07 | 1.097E-07 |
| 180 | Y10B_A | I20B_N | L23B_Q | K17B_S | 8.9E-08 | 3.7E-07 | 2.605E-07 | 8.405E-08 |
| 181 | Y10B_A | I20B_Q | F19B_Q | L23B_R | 7.2E-08 | 5.7E-07 | 2.616E-07 | 1.434E-07 |
| 182 | Y10B_A | G13B_W | I20B_S | V24B_Q | 1.1E-07 | 4.1E-07 | 2.625E-07 | 7.704E-08 |
| 183 | Y10B_A | I20B_Q | F19B_W | V24B_N | 9.9E-08 | 4.8E-07 | 2.639E-07 | 1.116E-07 |
| 184 | G13B_A | E18B_T | I20B_Q | K17B_S | 1.3E-07 | 5.7E-07 | 2.640E-07 | 1.199E-07 |
| 185 | G13B_A | I20B_N | F19B_Q | S9B_A  | 1.5E-07 | 5.1E-07 | 2.645E-07 | 9.665E-08 |
| 186 | G13B_A | I20B_N | V24B_Q | E12B_A | 1.5E-07 | 5.0E-07 | 2.645E-07 | 8.344E-08 |
| 187 | G13B_A | I20B_Q | F19B_Q | E12B_A | 9.8E-08 | 5.9E-07 | 2.649E-07 | 1.122E-07 |
| 188 | G13B_A | I20B_N | F19B_W | V24B_Q | 1.1E-07 | 6.0E-07 | 2.680E-07 | 1.221E-07 |
| 189 | G13B_A | I20B_T | F19B_W | L23B_Q | 7.0E-08 | 5.1E-07 | 2.685E-07 | 1.076E-07 |
| 190 | G13B_A | I20B_T | F19B_Q | S9B_A  | 1.2E-07 | 4.4E-07 | 2.695E-07 | 1.017E-07 |
| 191 | G13B_A | I20B_N | E18B_T | L23B_Q | 1.4E-07 | 4.7E-07 | 2.700E-07 | 9.984E-08 |
| 192 | G13B_A | I20B_Q | F19B_Q | K17B_S | 1.2E-07 | 4.9E-07 | 2.705E-07 | 1.205E-07 |
| 193 | Y10B_A | G13B_W | I20B_Q | V24B_T | 1.7E-07 | 4.8E-07 | 2.710E-07 | 8.509E-08 |
| 194 | Y10B_A | I20B_N | K17B_S | V24B_T | 1.9E-07 | 4.5E-07 | 2.715E-07 | 7.741E-08 |
| 195 | G13B_A | I20B_N | L23B_Q | E12B_A | 1.4E-07 | 5.1E-07 | 2.725E-07 | 9.492E-08 |
| 196 | G13B_A | E18B_T | I20B_S | L23B_R | 1.0E-07 | 5.2E-07 | 2.725E-07 | 1.202E-07 |
| 197 | Y10B_A | G13B_W | I20B_N | V24B_T | 1.0E-07 | 4.5E-07 | 2.740E-07 | 8.191E-08 |
| 198 | Y10B_A | E18B_T | I20B_Q | V24B_N | 1.0E-07 | 4.9E-07 | 2.745E-07 | 1.298E-07 |
| 199 | G13B_A | I20B_S | F19B_W | V24B_T | 1.3E-07 | 4.9E-07 | 2.745E-07 | 1.150E-07 |
| 200 | G13B_A | I20B_T | S9B_A  | K17B_S | 1.1E-07 | 4.0E-07 | 2.745E-07 | 8.513E-08 |
| 201 | Y10B_A | G13B_W | I20B_T | V24B_T | 1.7E-07 | 4.2E-07 | 2.750E-07 | 7.626E-08 |
| 202 | Y10B_A | I20B_Q | F19B_W | V24B_T | 1.0E-07 | 4.9E-07 | 2.755E-07 | 9.242E-08 |
| 203 | Y10B_A | E18B_T | I20B_Q | V24B_Q | 1.3E-07 | 4.9E-07 | 2.760E-07 | 9.110E-08 |
| 204 | G13B_A | I20B_T | V24B_T | E12B_A | 1.2E-07 | 4.0E-07 | 2.770E-07 | 6.982E-08 |
| 205 | G13B_A | I20B_Q | V24B_N | G1B_A  | 1.3E-07 | 4.8E-07 | 2.775E-07 | 8.973E-08 |
| 206 | G13B_A | I20B_Q | S9B_A  | K17B_S | 1.3E-07 | 5.2E-07 | 2.775E-07 | 1.165E-07 |
| 207 | Y10B_A | E18B_T | I20B_Q | L23B_Q | 8.9E-08 | 5.8E-07 | 2.779E-07 | 1.334E-07 |

|     |        |        |        |        |         |         |           |           |
|-----|--------|--------|--------|--------|---------|---------|-----------|-----------|
| 208 | S8B_A  | G13B_W | I20B_N | V24B_N | 2.0E-07 | 4.4E-07 | 2.780E-07 | 6.795E-08 |
| 209 | Y10B_A | G13B_W | I20B_T | V24B_Q | 1.4E-07 | 4.8E-07 | 2.790E-07 | 8.156E-08 |
| 210 | Y10B_A | I20B_N | E18B_T | L23B_R | 1.2E-07 | 6.8E-07 | 2.790E-07 | 1.307E-07 |
| 211 | Y10B_A | I20B_N | F19B_Q | V24B_T | 1.1E-07 | 9.1E-07 | 2.795E-07 | 1.737E-07 |
| 212 | Y10B_A | I20B_T | F19B_Q | V24B_Q | 1.2E-07 | 5.1E-07 | 2.800E-07 | 1.129E-07 |
| 213 | Y10B_A | I20B_Q | L23B_R | E12B_A | 1.2E-07 | 6.3E-07 | 2.800E-07 | 1.391E-07 |
| 214 | G13B_A | I20B_N | F19B_W | L23B_R | 1.1E-07 | 5.0E-07 | 2.800E-07 | 1.078E-07 |
| 215 | G13B_A | I20B_T | L23B_R | E12B_A | 1.3E-07 | 4.5E-07 | 2.805E-07 | 9.567E-08 |
| 216 | G13B_A | I20B_N | L23B_R | E12B_A | 1.6E-07 | 4.7E-07 | 2.815E-07 | 9.762E-08 |
| 217 | Y10B_A | I20B_N | K17B_S | V24B_Q | 1.2E-07 | 4.4E-07 | 2.815E-07 | 9.086E-08 |
| 218 | Y10B_A | I20B_S | L23B_R | K17B_S | 1.5E-07 | 5.9E-07 | 2.820E-07 | 1.054E-07 |
| 219 | G13B_A | I20B_S | S9B_A  | K17B_S | 1.3E-07 | 5.2E-07 | 2.825E-07 | 9.419E-08 |
| 220 | Y10B_A | I20B_N | E18B_T | V24B_Q | 1.2E-07 | 4.2E-07 | 2.830E-07 | 9.108E-08 |
| 221 | S8B_A  | G13B_W | I20B_T | V24B_N | 1.8E-07 | 4.1E-07 | 2.830E-07 | 6.482E-08 |
| 222 | G13B_A | I20B_S | F19B_Q | E12B_A | 8.3E-08 | 5.9E-07 | 2.832E-07 | 1.232E-07 |
| 223 | G13B_A | I20B_S | G1B_R  | V24B_N | 9.7E-08 | 5.9E-07 | 2.833E-07 | 1.113E-07 |
| 224 | Y10B_A | E18B_T | I20B_T | V24B_Q | 1.3E-07 | 5.0E-07 | 2.835E-07 | 9.917E-08 |
| 225 | G13B_A | L11B_A | I20B_Q | L23B_R | 1.2E-07 | 5.7E-07 | 2.835E-07 | 1.075E-07 |
| 226 | S8B_A  | G13B_W | I20B_Q | V24B_Q | 1.2E-07 | 5.9E-07 | 2.840E-07 | 1.282E-07 |
| 227 | S8B_A  | G13B_W | I20B_T | V24B_Q | 9.2E-08 | 4.8E-07 | 2.846E-07 | 8.594E-08 |
| 228 | Y10B_A | I20B_N | E18B_T | V24B_N | 1.5E-07 | 4.9E-07 | 2.850E-07 | 1.017E-07 |
| 229 | Y10B_A | I20B_T | S9B_A  | V24B_Q | 9.4E-08 | 4.2E-07 | 2.852E-07 | 9.607E-08 |
| 230 | G13B_A | E18B_T | I20B_T | F19B_Q | 1.3E-07 | 6.2E-07 | 2.865E-07 | 1.351E-07 |
| 231 | G13B_A | L11B_A | I20B_Q | V24B_N | 1.6E-07 | 4.6E-07 | 2.865E-07 | 7.492E-08 |
| 232 | S8B_A  | G13B_W | I20B_Q | F19B_Q | 9.9E-08 | 5.4E-07 | 2.884E-07 | 1.490E-07 |
| 233 | G13B_A | I20B_S | L23B_R | E12B_A | 1.6E-07 | 3.8E-07 | 2.890E-07 | 6.332E-08 |
| 234 | Y10B_A | E18B_T | I20B_S | V24B_Q | 1.5E-07 | 7.3E-07 | 2.890E-07 | 1.281E-07 |
| 235 | S8B_A  | G13B_W | I20B_Q | V24B_N | 1.4E-07 | 5.3E-07 | 2.905E-07 | 1.100E-07 |
| 236 | G13B_A | A16B_N | I20B_Q | V24B_Q | 3.1E-08 | 1.0E-06 | 2.909E-07 | 2.246E-07 |
| 237 | Y10B_A | I20B_Q | S9B_A  | V24B_N | 1.3E-07 | 6.7E-07 | 2.910E-07 | 1.107E-07 |
| 238 | Y10B_A | I20B_Q | F19B_W | V24B_Q | 1.5E-07 | 5.3E-07 | 2.910E-07 | 1.113E-07 |
| 239 | G13B_A | E18B_T | I20B_Q | F19B_Q | 8.1E-08 | 6.0E-07 | 2.911E-07 | 1.390E-07 |
| 240 | Y10B_A | I20B_N | K17B_S | V24B_N | 1.2E-07 | 5.8E-07 | 2.915E-07 | 1.201E-07 |
| 241 | Y10B_A | I20B_N | F19B_W | V24B_Q | 1.6E-07 | 6.7E-07 | 2.920E-07 | 1.222E-07 |
| 242 | Y10B_A | I20B_N | S9B_A  | V24B_N | 1.5E-07 | 6.7E-07 | 2.920E-07 | 1.245E-07 |
| 243 | G13B_A | I20B_N | F19B_Q | K17B_S | 1.2E-07 | 4.9E-07 | 2.925E-07 | 1.220E-07 |
| 244 | Y10B_A | E18B_T | I20B_Q | L23B_R | 1.0E-07 | 7.3E-07 | 2.925E-07 | 1.540E-07 |
| 245 | Y10B_A | G13B_W | I20B_Q | V24B_N | 1.4E-07 | 5.4E-07 | 2.930E-07 | 1.024E-07 |
| 246 | Y10B_A | I20B_S | S9B_A  | V24B_N | 1.5E-07 | 4.9E-07 | 2.935E-07 | 9.360E-08 |
| 247 | G13B_A | F3B_A  | I20B_Q | V24B_Q | 1.6E-07 | 7.0E-07 | 2.935E-07 | 1.175E-07 |
| 248 | Y10B_A | I20B_T | K17B_S | V24B_N | 1.7E-07 | 6.8E-07 | 2.935E-07 | 1.174E-07 |
| 249 | Y10B_A | G13B_W | I20B_Q | L23B_R | 1.2E-07 | 5.6E-07 | 2.935E-07 | 1.302E-07 |
| 250 | S8B_A  | G13B_W | I20B_N | L23B_R | 1.1E-07 | 6.8E-07 | 2.940E-07 | 1.233E-07 |
| 251 | G13B_A | A16B_N | I20B_Q | L23B_R | 1.3E-07 | 8.2E-07 | 2.945E-07 | 1.669E-07 |
| 252 | Y10B_A | E18B_T | I20B_T | V24B_N | 1.5E-07 | 5.8E-07 | 2.945E-07 | 1.246E-07 |
| 253 | Y10B_A | I20B_Q | L23B_R | K17B_S | 1.1E-07 | 4.7E-07 | 2.945E-07 | 8.363E-08 |
| 254 | Y10B_A | G13B_W | I20B_Q | V24B_Q | 1.1E-07 | 6.8E-07 | 2.950E-07 | 1.336E-07 |
| 255 | Y10B_A | I20B_S | L23B_Q | K17B_S | 1.5E-07 | 5.9E-07 | 2.950E-07 | 1.160E-07 |
| 256 | G13B_A | I20B_N | S9B_A  | K17B_S | 1.0E-07 | 4.7E-07 | 2.955E-07 | 1.113E-07 |
| 257 | Y10B_A | G13B_W | I20B_N | V24B_Q | 1.5E-07 | 5.7E-07 | 2.955E-07 | 8.739E-08 |
| 258 | Y10B_A | I20B_N | S9B_A  | V24B_Q | 1.9E-07 | 4.2E-07 | 2.965E-07 | 7.499E-08 |
| 259 | Y10B_A | I20B_T | L23B_R | K17B_S | 1.2E-07 | 4.1E-07 | 2.970E-07 | 9.370E-08 |

|     |        |        |        |        |         |         |           |           |
|-----|--------|--------|--------|--------|---------|---------|-----------|-----------|
| 260 | G13B_A | I20B_N | E18B_T | F19B_Q | 1.2E-07 | 4.9E-07 | 2.970E-07 | 1.080E-07 |
| 261 | Y10B_A | I20B_T | F19B_W | V24B_Q | 1.7E-07 | 6.3E-07 | 2.980E-07 | 1.041E-07 |
| 262 | Y10B_A | I20B_S | K17B_S | V24B_N | 1.4E-07 | 4.7E-07 | 2.980E-07 | 8.746E-08 |
| 263 | G13B_A | I20B_S | F19B_W | L23B_Q | 7.9E-08 | 5.1E-07 | 2.984E-07 | 1.204E-07 |
| 264 | Y10B_A | E18B_T | I20B_T | L23B_R | 1.2E-07 | 5.2E-07 | 2.990E-07 | 1.183E-07 |
| 265 | Y10B_A | E18B_T | I20B_T | V24B_T | 1.6E-07 | 6.7E-07 | 2.990E-07 | 1.103E-07 |
| 266 | Y10B_A | I20B_S | F19B_Q | L23B_R | 1.8E-07 | 5.4E-07 | 2.990E-07 | 1.008E-07 |
| 267 | Y10B_A | G13B_W | I20B_Q | L23B_Q | 1.5E-07 | 4.3E-07 | 2.990E-07 | 8.705E-08 |
| 268 | Y10B_A | I20B_T | S9B_A  | L23B_R | 1.6E-07 | 5.0E-07 | 2.995E-07 | 1.111E-07 |
| 269 | Y10B_A | I20B_N | L23B_R | K17B_S | 1.5E-07 | 5.6E-07 | 3.000E-07 | 1.279E-07 |
| 270 | G13B_A | F3B_A  | I20B_N | V24B_N | 1.3E-07 | 6.0E-07 | 3.000E-07 | 9.819E-08 |
| 271 | S8B_A  | G13B_W | I20B_S | V24B_N | 1.4E-07 | 5.1E-07 | 3.005E-07 | 8.823E-08 |
| 272 | G13B_A | I20B_T | G1B_R  | F19B_Q | 1.7E-07 | 5.3E-07 | 3.005E-07 | 9.316E-08 |
| 273 | G13B_A | I20B_N | F19B_A | V24B_N | 1.5E-07 | 5.2E-07 | 3.005E-07 | 1.273E-07 |
| 274 | G13B_A | I20B_Q | V24B_Q | G1B_A  | 5.8E-08 | 4.6E-07 | 3.014E-07 | 1.024E-07 |
| 275 | Y10B_A | I20B_N | E18B_T | V24B_T | 1.5E-07 | 5.2E-07 | 3.020E-07 | 8.989E-08 |
| 276 | Y10B_A | I20B_S | F19B_W | L23B_Q | 7.9E-08 | 7.5E-07 | 3.020E-07 | 1.675E-07 |
| 277 | Y10B_A | I20B_Q | E12B_A | V24B_N | 1.3E-07 | 5.3E-07 | 3.025E-07 | 1.050E-07 |
| 278 | Y10B_A | G13B_W | I20B_T | V24B_N | 1.8E-07 | 4.4E-07 | 3.030E-07 | 7.699E-08 |
| 279 | G13B_A | F3B_A  | I20B_Q | L23B_R | 1.3E-07 | 5.8E-07 | 3.035E-07 | 1.196E-07 |
| 280 | Y10B_A | I20B_T | K17B_S | V24B_Q | 1.3E-07 | 6.6E-07 | 3.035E-07 | 1.369E-07 |
| 281 | Y10B_A | I20B_Q | L23B_Q | K17B_S | 1.0E-07 | 5.6E-07 | 3.040E-07 | 1.503E-07 |
| 282 | Y10B_A | I20B_Q | S9B_A  | L23B_Q | 9.3E-08 | 4.5E-07 | 3.047E-07 | 1.057E-07 |
| 283 | Y10B_A | I20B_S | S9B_A  | V24B_Q | 1.7E-07 | 5.2E-07 | 3.050E-07 | 7.722E-08 |
| 284 | Y10B_A | I20B_T | F19B_W | V24B_T | 1.7E-07 | 5.5E-07 | 3.050E-07 | 1.076E-07 |
| 285 | G13B_A | F3B_A  | I20B_T | V24B_N | 2.0E-07 | 4.6E-07 | 3.055E-07 | 8.056E-08 |
| 286 | Y10B_A | I20B_N | E18B_T | L23B_Q | 1.3E-07 | 5.3E-07 | 3.060E-07 | 1.154E-07 |
| 287 | S8B_A  | G13B_W | I20B_N | V24B_Q | 2.1E-07 | 4.6E-07 | 3.070E-07 | 7.463E-08 |
| 288 | G13B_A | E18B_T | I20B_S | K17B_S | 1.4E-07 | 5.8E-07 | 3.075E-07 | 1.326E-07 |
| 289 | Y10B_A | I20B_T | L23B_Q | K17B_S | 1.4E-07 | 5.9E-07 | 3.090E-07 | 1.227E-07 |
| 290 | G13B_A | I20B_N | F19B_A | V24B_Q | 1.6E-07 | 4.6E-07 | 3.090E-07 | 7.973E-08 |
| 291 | G13B_A | I20B_Q | F19B_A | V24B_Q | 1.2E-07 | 6.7E-07 | 3.095E-07 | 1.202E-07 |
| 292 | Y10B_A | I20B_N | F19B_W | L23B_Q | 1.2E-07 | 4.7E-07 | 3.095E-07 | 9.299E-08 |
| 293 | Y10B_A | I20B_Q | F19B_Q | S9B_A  | 1.5E-07 | 4.9E-07 | 3.105E-07 | 1.231E-07 |
| 294 | G13B_A | I20B_N | L23B_R | G1B_A  | 1.4E-07 | 4.9E-07 | 3.105E-07 | 1.000E-07 |
| 295 | Y10B_A | G13B_W | I20B_N | L23B_Q | 1.2E-07 | 6.1E-07 | 3.110E-07 | 1.349E-07 |
| 296 | G13B_A | V7B_A  | I20B_T | V24B_T | 1.6E-07 | 4.9E-07 | 3.110E-07 | 8.110E-08 |
| 297 | G13B_A | I20B_T | F19B_A | V24B_N | 1.6E-07 | 5.2E-07 | 3.110E-07 | 1.095E-07 |
| 298 | Y10B_A | I20B_Q | S9B_A  | V24B_T | 1.5E-07 | 4.7E-07 | 3.110E-07 | 8.360E-08 |
| 299 | G13B_A | I20B_S | G1B_R  | V24B_Q | 1.8E-07 | 4.5E-07 | 3.115E-07 | 8.273E-08 |
| 300 | Y10B_A | I20B_N | E12B_A | V24B_N | 1.7E-07 | 5.3E-07 | 3.120E-07 | 9.913E-08 |
| 301 | G13B_A | I20B_Q | G1B_R  | V24B_N | 1.6E-07 | 4.5E-07 | 3.120E-07 | 8.345E-08 |
| 302 | Y10B_A | I20B_S | F19B_Q | L23B_Q | 1.6E-07 | 5.5E-07 | 3.120E-07 | 9.384E-08 |
| 303 | G13B_A | I20B_S | F19B_A | V24B_N | 1.8E-07 | 4.8E-07 | 3.120E-07 | 7.592E-08 |
| 304 | G13B_A | I20B_Q | E18B_A | V24B_N | 1.5E-07 | 5.7E-07 | 3.120E-07 | 1.128E-07 |
| 305 | G13B_A | I20B_T | L23B_Q | F19B_A | 1.3E-07 | 5.0E-07 | 3.130E-07 | 1.121E-07 |
| 306 | Y10B_A | I20B_S | S9B_A  | L23B_R | 1.6E-07 | 5.3E-07 | 3.130E-07 | 1.114E-07 |
| 307 | Y10B_A | G13B_W | I20B_S | V24B_N | 1.8E-07 | 6.0E-07 | 3.135E-07 | 9.735E-08 |
| 308 | G13B_A | I20B_N | G1B_R  | L23B_R | 2.1E-07 | 5.3E-07 | 3.140E-07 | 8.982E-08 |
| 309 | G13B_A | I20B_S | F19B_W | L23B_R | 1.0E-07 | 6.0E-07 | 3.140E-07 | 1.145E-07 |
| 310 | Y10B_A | I20B_Q | V24B_Q | E12B_A | 1.1E-07 | 5.7E-07 | 3.145E-07 | 1.116E-07 |
| 311 | S8B_A  | G13B_W | I20B_S | L23B_Q | 1.8E-07 | 5.8E-07 | 3.150E-07 | 1.092E-07 |

|     |        |        |        |        |         |         |           |           |
|-----|--------|--------|--------|--------|---------|---------|-----------|-----------|
| 312 | Y10B_A | I20B_S | K17B_S | V24B_T | 1.9E-07 | 5.0E-07 | 3.150E-07 | 8.733E-08 |
| 313 | Y10B_A | G13B_W | I20B_Q | F19B_Q | 1.3E-07 | 7.7E-07 | 3.155E-07 | 1.756E-07 |
| 314 | G13B_A | I20B_N | L11B_A | L23B_R | 2.2E-07 | 5.7E-07 | 3.155E-07 | 8.799E-08 |
| 315 | G13B_A | I20B_Q | F19B_W | L23B_R | 1.4E-07 | 6.2E-07 | 3.155E-07 | 1.177E-07 |
| 316 | G13B_A | I20B_N | F19B_Q | E12B_A | 1.5E-07 | 4.7E-07 | 3.160E-07 | 9.896E-08 |
| 317 | Y10B_A | I20B_T | F19B_Q | S9B_A  | 1.2E-07 | 5.8E-07 | 3.165E-07 | 1.144E-07 |
| 318 | G13B_A | I20B_N | G1B_R  | V24B_N | 2.0E-07 | 7.6E-07 | 3.165E-07 | 1.282E-07 |
| 319 | G13B_A | I20B_Q | F19B_W | K17B_S | 1.8E-07 | 6.0E-07 | 3.165E-07 | 1.070E-07 |
| 320 | Y10B_A | E18B_T | I20B_S | V24B_N | 1.4E-07 | 6.0E-07 | 3.165E-07 | 1.249E-07 |
| 321 | S8B_A  | G13B_W | I20B_T | L23B_Q | 1.9E-07 | 5.2E-07 | 3.170E-07 | 7.888E-08 |
| 322 | Y10B_A | I20B_N | S9B_A  | V24B_T | 1.6E-07 | 5.8E-07 | 3.175E-07 | 1.171E-07 |
| 323 | G13B_A | I20B_Q | G1B_R  | V24B_Q | 2.2E-07 | 5.1E-07 | 3.180E-07 | 9.209E-08 |
| 324 | Y10B_A | I20B_S | F19B_W | V24B_N | 8.3E-08 | 6.6E-07 | 3.187E-07 | 1.428E-07 |
| 325 | G13B_A | V7B_A  | I20B_S | V24B_N | 1.9E-07 | 4.8E-07 | 3.190E-07 | 8.207E-08 |
| 326 | S8B_A  | G13B_W | I20B_S | V24B_T | 2.1E-07 | 4.8E-07 | 3.190E-07 | 7.419E-08 |
| 327 | G13B_A | E18B_T | I20B_T | K17B_S | 1.7E-07 | 5.5E-07 | 3.195E-07 | 1.093E-07 |
| 328 | G13B_A | A16B_N | I20B_S | L23B_R | 1.1E-07 | 6.8E-07 | 3.195E-07 | 1.593E-07 |
| 329 | G13B_A | V7B_A  | I20B_S | V24B_Q | 1.9E-07 | 5.3E-07 | 3.195E-07 | 1.000E-07 |
| 330 | Y10B_A | G13B_W | I20B_S | L23B_R | 1.8E-07 | 4.6E-07 | 3.200E-07 | 7.746E-08 |
| 331 | G13B_A | L11B_A | I20B_Q | V24B_T | 1.8E-07 | 5.6E-07 | 3.200E-07 | 1.024E-07 |
| 332 | Y10B_A | I20B_N | S9B_A  | L23B_R | 1.9E-07 | 6.1E-07 | 3.205E-07 | 1.132E-07 |
| 333 | G13B_A | I20B_N | V24B_N | G1B_A  | 1.4E-07 | 5.7E-07 | 3.205E-07 | 1.043E-07 |
| 334 | G13B_A | I20B_S | L23B_Q | F19B_A | 1.4E-07 | 7.1E-07 | 3.210E-07 | 1.353E-07 |
| 335 | G13B_A | A16B_N | I20B_T | V24B_N | 8.2E-08 | 6.7E-07 | 3.211E-07 | 1.571E-07 |
| 336 | S8B_A  | G13B_W | I20B_Q | V24B_T | 1.2E-07 | 5.7E-07 | 3.215E-07 | 1.216E-07 |
| 337 | Y10B_A | G13B_W | I20B_S | V24B_T | 1.8E-07 | 5.9E-07 | 3.215E-07 | 1.124E-07 |
| 338 | G13B_A | I20B_Q | G1B_R  | V24B_T | 1.6E-07 | 5.8E-07 | 3.220E-07 | 1.222E-07 |
| 339 | G13B_A | I20B_S | V24B_T | E12B_A | 1.7E-07 | 5.8E-07 | 3.220E-07 | 1.039E-07 |
| 340 | Y10B_A | I20B_Q | F19B_W | L23B_Q | 9.4E-08 | 6.1E-07 | 3.229E-07 | 1.531E-07 |
| 341 | Y10B_A | G13B_W | I20B_T | L23B_Q | 2.2E-07 | 5.5E-07 | 3.235E-07 | 8.493E-08 |
| 342 | G13B_A | A16B_N | I20B_N | V24B_T | 6.3E-08 | 7.0E-07 | 3.235E-07 | 1.742E-07 |
| 343 | G13B_A | I20B_T | V24B_N | G1B_A  | 2.3E-07 | 4.6E-07 | 3.235E-07 | 6.808E-08 |
| 344 | G13B_A | V7B_A  | I20B_N | V24B_N | 2.0E-07 | 5.2E-07 | 3.240E-07 | 9.550E-08 |
| 345 | G13B_A | A16B_N | I20B_N | V24B_Q | 1.0E-07 | 6.0E-07 | 3.240E-07 | 1.402E-07 |
| 346 | G13B_A | L11B_A | I20B_Q | V24B_Q | 1.4E-07 | 5.4E-07 | 3.240E-07 | 1.215E-07 |
| 347 | G13B_A | F3B_A  | I20B_N | L23B_R | 1.5E-07 | 4.9E-07 | 3.250E-07 | 1.074E-07 |
| 348 | G13B_A | E18B_T | I20B_Q | S9B_A  | 1.2E-07 | 5.8E-07 | 3.255E-07 | 1.297E-07 |
| 349 | G13B_A | I20B_Q | F19B_A | V24B_N | 1.5E-07 | 6.4E-07 | 3.255E-07 | 1.332E-07 |
| 350 | G13B_A | F3B_A  | I20B_Q | V24B_N | 1.8E-07 | 5.4E-07 | 3.265E-07 | 1.190E-07 |
| 351 | G13B_A | I20B_S | F19B_A | V24B_Q | 1.7E-07 | 4.8E-07 | 3.265E-07 | 8.337E-08 |
| 352 | Y10B_A | I20B_T | V24B_Q | E12B_A | 1.9E-07 | 6.0E-07 | 3.270E-07 | 1.131E-07 |
| 353 | G13B_A | D6B_A  | I20B_Q | V24B_Q | 1.2E-07 | 5.2E-07 | 3.275E-07 | 1.064E-07 |
| 354 | G13B_A | I20B_Q | G1B_R  | L23B_R | 1.2E-07 | 6.2E-07 | 3.275E-07 | 1.334E-07 |
| 355 | Y10B_A | I20B_T | S9B_A  | V24B_N | 2.0E-07 | 5.5E-07 | 3.280E-07 | 9.512E-08 |
| 356 | G13B_A | I20B_Q | E18B_A | F19B_Q | 1.2E-07 | 8.0E-07 | 3.280E-07 | 1.691E-07 |
| 357 | Y10B_A | I20B_N | F19B_Q | S9B_A  | 1.1E-07 | 6.8E-07 | 3.280E-07 | 1.620E-07 |
| 358 | G13B_A | I20B_T | G1B_R  | L23B_R | 2.0E-07 | 5.4E-07 | 3.280E-07 | 9.699E-08 |
| 359 | G13B_A | I20B_Q | F19B_A | V24B_T | 1.6E-07 | 5.5E-07 | 3.285E-07 | 1.107E-07 |
| 360 | S8B_A  | G13B_W | I20B_N | V24B_T | 1.8E-07 | 7.7E-07 | 3.285E-07 | 1.646E-07 |
| 361 | G13B_A | I20B_N | G1B_R  | L23B_Q | 1.7E-07 | 5.4E-07 | 3.285E-07 | 9.201E-08 |
| 362 | G13B_A | I20B_T | F19B_W | L23B_R | 1.4E-07 | 6.0E-07 | 3.290E-07 | 1.305E-07 |
| 363 | Y10B_A | E18B_T | I20B_S | L23B_R | 1.4E-07 | 6.2E-07 | 3.290E-07 | 1.423E-07 |



|     |        |        |        |        |         |         |           |           |
|-----|--------|--------|--------|--------|---------|---------|-----------|-----------|
| 364 | S8B_A  | G13B_W | I20B_T | L23B_R | 1.4E-07 | 4.4E-07 | 3.295E-07 | 8.599E-08 |
| 365 | S8B_A  | G13B_W | I20B_Q | L23B_Q | 1.5E-07 | 6.4E-07 | 3.295E-07 | 1.409E-07 |
| 366 | G13B_A | I20B_T | F19B_A | V24B_Q | 1.9E-07 | 6.4E-07 | 3.300E-07 | 1.165E-07 |
| 367 | Y10B_A | I20B_T | S9B_A  | V24B_T | 1.8E-07 | 4.9E-07 | 3.300E-07 | 8.730E-08 |
| 368 | Y10B_A | I20B_N | F19B_Q | L23B_Q | 1.3E-07 | 6.4E-07 | 3.300E-07 | 1.528E-07 |
| 369 | G13B_A | I20B_Q | F19B_W | S9B_A  | 1.7E-07 | 5.4E-07 | 3.300E-07 | 1.042E-07 |
| 370 | G13B_A | I20B_T | L11B_A | V24B_N | 1.6E-07 | 4.6E-07 | 3.305E-07 | 8.445E-08 |
| 371 | Y10B_A | I20B_S | S9B_A  | L23B_Q | 1.8E-07 | 6.9E-07 | 3.310E-07 | 1.304E-07 |
| 372 | Y10B_A | I20B_S | F19B_Q | K17B_S | 4.6E-08 | 5.5E-07 | 3.313E-07 | 1.276E-07 |
| 373 | Y10B_A | I20B_S | E12B_A | V24B_N | 1.8E-07 | 4.5E-07 | 3.315E-07 | 7.969E-08 |
| 374 | G13B_A | I20B_N | G1B_R  | V24B_Q | 2.1E-07 | 5.3E-07 | 3.320E-07 | 9.451E-08 |
| 375 | G13B_A | I20B_S | G1B_R  | L23B_Q | 1.1E-07 | 6.3E-07 | 3.320E-07 | 1.326E-07 |
| 376 | G13B_A | I20B_N | K17B_S | E12B_A | 1.8E-07 | 5.6E-07 | 3.320E-07 | 1.092E-07 |
| 377 | G13B_A | I20B_S | L23B_Q | E12B_A | 1.5E-07 | 5.9E-07 | 3.325E-07 | 1.049E-07 |
| 378 | G13B_A | D6B_A  | I20B_Q | V24B_N | 1.5E-07 | 6.4E-07 | 3.325E-07 | 1.404E-07 |
| 379 | S8B_A  | G13B_W | I20B_S | V24B_Q | 1.8E-07 | 4.6E-07 | 3.325E-07 | 8.058E-08 |
| 380 | G13B_A | I20B_S | V24B_T | G1B_A  | 1.7E-07 | 5.1E-07 | 3.330E-07 | 9.286E-08 |
| 381 | G13B_A | I20B_N | G1B_R  | V24B_T | 1.7E-07 | 5.0E-07 | 3.335E-07 | 8.425E-08 |
| 382 | Y10B_A | E18B_T | I20B_S | V24B_T | 1.5E-07 | 6.1E-07 | 3.335E-07 | 1.255E-07 |
| 383 | G13B_A | A16B_N | I20B_S | V24B_T | 6.2E-08 | 7.4E-07 | 3.337E-07 | 1.545E-07 |
| 384 | G13B_A | V7B_A  | I20B_Q | L23B_R | 9.8E-08 | 8.6E-07 | 3.339E-07 | 1.685E-07 |
| 385 | Y10B_A | E18B_T | I20B_Q | K17B_S | 1.8E-07 | 6.2E-07 | 3.340E-07 | 1.339E-07 |
| 386 | G13B_A | V7B_A  | I20B_N | L23B_R | 1.9E-07 | 4.9E-07 | 3.345E-07 | 1.006E-07 |
| 387 | Y10B_A | G13B_W | I20B_T | F19B_Q | 1.1E-07 | 5.9E-07 | 3.350E-07 | 1.344E-07 |
| 388 | Y10B_A | G13B_W | I20B_T | L23B_R | 1.6E-07 | 6.0E-07 | 3.350E-07 | 1.150E-07 |
| 389 | G13B_A | V7B_A  | I20B_Q | L23B_Q | 1.8E-07 | 5.5E-07 | 3.355E-07 | 1.109E-07 |
| 390 | G13B_A | I20B_N | E18B_A | V24B_N | 2.2E-07 | 5.2E-07 | 3.360E-07 | 7.956E-08 |
| 391 | Y10B_A | I20B_S | V24B_Q | E12B_A | 2.3E-07 | 7.6E-07 | 3.365E-07 | 1.150E-07 |
| 392 | Y10B_A | I20B_S | S9B_A  | V24B_T | 2.1E-07 | 5.8E-07 | 3.380E-07 | 8.865E-08 |
| 393 | G13B_A | I20B_T | G1B_R  | V24B_Q | 1.7E-07 | 5.0E-07 | 3.385E-07 | 7.929E-08 |
| 394 | G13B_A | V7B_A  | I20B_Q | V24B_T | 1.4E-07 | 5.3E-07 | 3.385E-07 | 1.025E-07 |
| 395 | G13B_A | I20B_Q | E18B_A | L23B_R | 1.4E-07 | 8.5E-07 | 3.395E-07 | 1.807E-07 |
| 396 | S8B_A  | G13B_W | I20B_T | V24B_T | 1.8E-07 | 6.0E-07 | 3.395E-07 | 9.305E-08 |
| 397 | G13B_A | A16B_N | I20B_T | L23B_R | 6.7E-08 | 7.5E-07 | 3.399E-07 | 1.534E-07 |
| 398 | G13B_A | I20B_N | E18B_T | K17B_S | 1.4E-07 | 6.4E-07 | 3.400E-07 | 1.214E-07 |
| 399 | Y10B_A | I20B_T | E12B_A | V24B_N | 1.7E-07 | 5.9E-07 | 3.400E-07 | 1.058E-07 |
| 400 | Y10B_A | I20B_Q | S9B_A  | L23B_R | 1.1E-07 | 6.5E-07 | 3.400E-07 | 1.606E-07 |
| 401 | G13B_A | I20B_Q | V24B_T | G1B_A  | 1.7E-07 | 6.3E-07 | 3.400E-07 | 1.069E-07 |
| 402 | G13B_A | I20B_T | G1B_R  | V24B_N | 1.8E-07 | 5.7E-07 | 3.400E-07 | 9.414E-08 |
| 403 | G13B_A | I20B_N | L11B_A | V24B_N | 1.6E-07 | 4.6E-07 | 3.405E-07 | 8.988E-08 |
| 404 | G13B_A | I20B_Q | E18B_A | V24B_T | 1.1E-07 | 5.8E-07 | 3.405E-07 | 1.367E-07 |
| 405 | G13B_A | I20B_T | V24B_Q | G1B_A  | 1.8E-07 | 6.4E-07 | 3.405E-07 | 1.227E-07 |
| 406 | G13B_A | V7B_A  | I20B_T | V24B_Q | 1.9E-07 | 5.3E-07 | 3.405E-07 | 1.127E-07 |
| 407 | Y10B_A | I20B_N | S9B_A  | L23B_Q | 1.6E-07 | 6.9E-07 | 3.410E-07 | 1.340E-07 |
| 408 | G13B_A | I20B_Q | L23B_Q | F19B_A | 1.4E-07 | 7.9E-07 | 3.415E-07 | 1.441E-07 |
| 409 | Y10B_A | I20B_Q | V24B_T | E12B_A | 1.6E-07 | 6.2E-07 | 3.415E-07 | 1.372E-07 |
| 410 | Y10B_A | I20B_T | F19B_W | V24B_N | 1.7E-07 | 6.4E-07 | 3.425E-07 | 1.259E-07 |
| 411 | G13B_A | V7B_A  | I20B_Q | V24B_N | 2.2E-07 | 5.7E-07 | 3.425E-07 | 1.015E-07 |
| 412 | G13B_A | L23B_Q | K17B_S | V24B_Q | 1.6E-07 | 5.5E-07 | 3.425E-07 | 1.395E-07 |
| 413 | S8B_A  | G13B_W | I20B_N | L23B_Q | 1.8E-07 | 6.0E-07 | 3.430E-07 | 1.177E-07 |
| 414 | Y10B_A | E18B_T | I20B_S | L23B_Q | 1.9E-07 | 7.3E-07 | 3.430E-07 | 1.360E-07 |
| 415 | G13B_A | V7B_A  | I20B_Q | F19B_Q | 1.6E-07 | 9.1E-07 | 3.430E-07 | 2.011E-07 |

|     |        |        |        |        |         |         |           |           |
|-----|--------|--------|--------|--------|---------|---------|-----------|-----------|
| 416 | G13B_A | I20B_S | V24B_Q | G1B_A  | 2.0E-07 | 4.8E-07 | 3.430E-07 | 7.219E-08 |
| 417 | G13B_A | I20B_N | E18B_T | S9B_A  | 1.5E-07 | 6.8E-07 | 3.440E-07 | 1.268E-07 |
| 418 | Y10B_A | I20B_T | V24B_T | E12B_A | 2.3E-07 | 5.7E-07 | 3.440E-07 | 9.316E-08 |
| 419 | G13B_A | V7B_A  | I20B_N | V24B_Q | 2.1E-07 | 4.8E-07 | 3.440E-07 | 9.355E-08 |
| 420 | Y10B_A | I20B_T | S9B_A  | L23B_Q | 1.5E-07 | 5.9E-07 | 3.445E-07 | 1.044E-07 |
| 421 | G13B_A | D6B_A  | I20B_T | V24B_Q | 2.0E-07 | 4.9E-07 | 3.445E-07 | 9.944E-08 |
| 422 | G13B_A | I20B_N | L11B_A | V24B_Q | 1.9E-07 | 5.4E-07 | 3.445E-07 | 1.112E-07 |
| 423 | G13B_A | F3B_A  | I20B_S | V24B_N | 2.0E-07 | 7.0E-07 | 3.450E-07 | 1.338E-07 |
| 424 | G13B_A | F3B_A  | I20B_S | V24B_T | 2.1E-07 | 4.8E-07 | 3.455E-07 | 7.817E-08 |
| 425 | G13B_A | I20B_Q | L23B_R | F19B_A | 1.5E-07 | 7.0E-07 | 3.455E-07 | 1.456E-07 |
| 426 | Y10B_A | E18B_T | I20B_T | L23B_Q | 1.1E-07 | 7.7E-07 | 3.460E-07 | 1.678E-07 |
| 427 | Y10B_A | I20B_Q | L23B_Q | E12B_A | 1.6E-07 | 6.3E-07 | 3.465E-07 | 1.324E-07 |
| 428 | G13B_A | I20B_T | L23B_Q | G1B_A  | 1.8E-07 | 7.0E-07 | 3.465E-07 | 1.287E-07 |
| 429 | Y10B_A | I20B_T | F19B_W | L23B_R | 1.3E-07 | 6.7E-07 | 3.470E-07 | 1.125E-07 |
| 430 | G13B_A | I20B_S | G1B_R  | L23B_R | 1.7E-07 | 5.7E-07 | 3.470E-07 | 1.093E-07 |
| 431 | G13B_A | F3B_A  | I20B_Q | V24B_T | 1.2E-07 | 6.3E-07 | 3.470E-07 | 1.377E-07 |
| 432 | S8B_A  | G13B_W | I20B_S | L23B_R | 1.6E-07 | 6.0E-07 | 3.470E-07 | 1.107E-07 |
| 433 | G13B_A | I20B_N | V24B_Q | G1B_A  | 2.1E-07 | 5.7E-07 | 3.480E-07 | 8.102E-08 |
| 434 | Y10B_A | I20B_N | V24B_T | E12B_A | 2.0E-07 | 7.2E-07 | 3.480E-07 | 1.473E-07 |
| 435 | G13B_A | I20B_N | E18B_A | V24B_Q | 1.8E-07 | 5.2E-07 | 3.485E-07 | 8.412E-08 |
| 436 | G13B_A | F3B_A  | I20B_N | V24B_Q | 1.8E-07 | 5.4E-07 | 3.485E-07 | 9.045E-08 |
| 437 | G13B_A | D6B_A  | I20B_Q | L23B_Q | 1.3E-07 | 6.2E-07 | 3.490E-07 | 1.466E-07 |
| 438 | G13B_A | A16B_N | I20B_T | F19B_Q | 8.5E-08 | 9.6E-07 | 3.492E-07 | 2.348E-07 |
| 439 | G13B_A | I20B_T | G1B_R  | V24B_T | 1.9E-07 | 6.1E-07 | 3.495E-07 | 9.698E-08 |
| 440 | G13B_A | L11B_A | I20B_Q | L23B_Q | 1.5E-07 | 5.7E-07 | 3.495E-07 | 1.274E-07 |
| 441 | G13B_A | F19B_Q | L23B_Q | V24B_Q | 1.5E-07 | 7.8E-07 | 3.495E-07 | 1.772E-07 |
| 442 | G13B_A | I20B_T | L11B_A | L23B_R | 1.6E-07 | 6.0E-07 | 3.500E-07 | 1.305E-07 |
| 443 | Y10B_A | I20B_Q | F19B_W | L23B_R | 1.3E-07 | 6.6E-07 | 3.505E-07 | 1.286E-07 |
| 444 | Y10B_A | G13B_W | I20B_N | L23B_R | 1.6E-07 | 5.7E-07 | 3.505E-07 | 1.206E-07 |
| 445 | G13B_A | I20B_N | F19B_A | V24B_T | 1.7E-07 | 6.1E-07 | 3.505E-07 | 1.165E-07 |
| 446 | S8B_A  | G13B_W | I20B_T | F19B_Q | 1.2E-07 | 6.6E-07 | 3.510E-07 | 1.382E-07 |
| 447 | Y10B_A | I20B_S | V24B_T | E12B_A | 1.3E-07 | 5.5E-07 | 3.510E-07 | 1.069E-07 |
| 448 | G13B_A | I20B_Q | L23B_R | G1B_A  | 1.7E-07 | 5.8E-07 | 3.510E-07 | 1.335E-07 |
| 449 | G13B_A | E18B_T | I20B_S | S9B_A  | 1.3E-07 | 6.1E-07 | 3.525E-07 | 1.228E-07 |
| 450 | G13B_A | F3B_A  | I20B_Q | F19B_Q | 1.4E-07 | 6.6E-07 | 3.525E-07 | 1.415E-07 |
| 451 | Y10B_A | I20B_N | F19B_W | V24B_T | 2.1E-07 | 7.0E-07 | 3.525E-07 | 1.392E-07 |
| 452 | S8B_A  | G13B_W | I20B_S | F19B_Q | 1.6E-07 | 6.9E-07 | 3.525E-07 | 1.299E-07 |
| 453 | G13B_A | D6B_A  | I20B_N | V24B_Q | 1.8E-07 | 6.1E-07 | 3.535E-07 | 1.117E-07 |
| 454 | G13B_A | V7B_A  | I20B_N | V24B_T | 1.8E-07 | 7.0E-07 | 3.535E-07 | 1.451E-07 |
| 455 | G13B_A | I20B_T | F19B_A | V24B_T | 2.0E-07 | 7.5E-07 | 3.535E-07 | 1.388E-07 |
| 456 | Y10B_A | I20B_Q | F19B_A | V24B_Q | 1.5E-07 | 5.8E-07 | 3.540E-07 | 1.115E-07 |
| 457 | G13B_A | I20B_Q | T4B_A  | L23B_R | 1.5E-07 | 6.4E-07 | 3.540E-07 | 1.427E-07 |
| 458 | G13B_A | I20B_Q | E18B_A | V24B_Q | 1.5E-07 | 6.5E-07 | 3.545E-07 | 1.364E-07 |
| 459 | G13B_A | L11B_A | I20B_S | V24B_Q | 1.8E-07 | 4.8E-07 | 3.545E-07 | 8.587E-08 |
| 460 | G13B_A | A16B_N | I20B_N | L23B_R | 1.5E-07 | 7.9E-07 | 3.545E-07 | 1.563E-07 |
| 461 | G13B_A | I20B_S | E18B_A | V24B_N | 2.1E-07 | 5.2E-07 | 3.545E-07 | 8.751E-08 |
| 462 | Y10B_A | I20B_N | E18B_T | K17B_S | 1.3E-07 | 6.2E-07 | 3.550E-07 | 1.395E-07 |
| 463 | G13B_A | I20B_S | F19B_W | K17B_S | 1.9E-07 | 5.8E-07 | 3.550E-07 | 1.229E-07 |
| 464 | G13B_A | E18B_T | I20B_T | S9B_A  | 1.8E-07 | 6.1E-07 | 3.555E-07 | 1.241E-07 |
| 465 | G13B_A | V7B_A  | I20B_T | F19B_Q | 9.5E-08 | 5.6E-07 | 3.557E-07 | 1.331E-07 |
| 466 | Y10B_A | I20B_T | L23B_R | E12B_A | 1.7E-07 | 6.6E-07 | 3.560E-07 | 1.141E-07 |
| 467 | G13B_A | F3B_A  | I20B_N | L23B_Q | 7.7E-08 | 6.1E-07 | 3.563E-07 | 1.270E-07 |

|     |        |        |        |        |         |         |           |           |
|-----|--------|--------|--------|--------|---------|---------|-----------|-----------|
| 468 | G13B_A | A16B_N | I20B_Q | V24B_T | 8.5E-08 | 6.2E-07 | 3.568E-07 | 1.387E-07 |
| 469 | G13B_A | D6B_A  | I20B_Q | L23B_R | 1.9E-07 | 8.3E-07 | 3.570E-07 | 1.602E-07 |
| 470 | Y10B_A | I20B_Q | S9B_A  | K17B_S | 1.5E-07 | 5.9E-07 | 3.570E-07 | 1.248E-07 |
| 471 | G13B_A | V7B_A  | I20B_T | L23B_R | 1.9E-07 | 5.8E-07 | 3.570E-07 | 1.095E-07 |
| 472 | G13B_A | I20B_N | L11B_A | L23B_Q | 2.1E-07 | 6.7E-07 | 3.575E-07 | 1.375E-07 |
| 473 | Y10B_A | I20B_S | F19B_Q | S9B_A  | 8.3E-08 | 7.4E-07 | 3.577E-07 | 1.553E-07 |
| 474 | G13B_A | I20B_T | L11B_A | L23B_Q | 1.5E-07 | 6.7E-07 | 3.580E-07 | 1.137E-07 |
| 475 | G13B_A | V7B_A  | I20B_Q | V24B_Q | 2.0E-07 | 5.4E-07 | 3.580E-07 | 9.540E-08 |
| 476 | G13B_A | I20B_T | E18B_A | V24B_N | 1.9E-07 | 5.0E-07 | 3.580E-07 | 7.905E-08 |
| 477 | Y10B_A | I20B_T | F19B_Q | L23B_R | 8.2E-08 | 6.7E-07 | 3.586E-07 | 1.524E-07 |
| 478 | G13B_A | I20B_Q | S9B_A  | E12B_A | 2.0E-07 | 6.5E-07 | 3.590E-07 | 1.158E-07 |
| 479 | G13B_A | D6B_A  | I20B_T | V24B_N | 2.1E-07 | 6.1E-07 | 3.595E-07 | 1.112E-07 |
| 480 | G13B_A | I20B_N | F19B_W | S9B_A  | 1.7E-07 | 7.0E-07 | 3.595E-07 | 1.497E-07 |
| 481 | G13B_A | I20B_T | F19B_W | E12B_A | 1.8E-07 | 5.8E-07 | 3.595E-07 | 1.230E-07 |
| 482 | G13B_A | A16B_N | I20B_Q | L23B_Q | 1.4E-07 | 8.4E-07 | 3.600E-07 | 1.781E-07 |
| 483 | Y10B_A | I20B_N | L23B_R | E12B_A | 1.3E-07 | 7.4E-07 | 3.600E-07 | 1.601E-07 |
| 484 | Y10B_A | I20B_N | F19B_Q | L23B_R | 1.9E-07 | 6.4E-07 | 3.605E-07 | 1.407E-07 |
| 485 | G13B_A | I20B_S | L23B_Q | G1B_A  | 1.6E-07 | 6.4E-07 | 3.610E-07 | 1.273E-07 |
| 486 | G13B_A | I20B_T | S9B_A  | E12B_A | 2.2E-07 | 5.0E-07 | 3.620E-07 | 7.951E-08 |
| 487 | Y10B_A | I20B_N | F19B_Q | K17B_S | 1.8E-07 | 7.2E-07 | 3.620E-07 | 1.605E-07 |
| 488 | G13B_A | L11B_A | I20B_Q | F19B_Q | 9.4E-08 | 6.6E-07 | 3.622E-07 | 1.519E-07 |
| 489 | G13B_A | D6B_A  | I20B_N | V24B_N | 2.1E-07 | 6.1E-07 | 3.630E-07 | 1.054E-07 |
| 490 | G13B_A | I20B_S | F19B_W | S9B_A  | 2.0E-07 | 5.7E-07 | 3.630E-07 | 1.207E-07 |
| 491 | G13B_A | I20B_Q | G1B_R  | F19B_Q | 1.3E-07 | 9.9E-07 | 3.635E-07 | 1.966E-07 |
| 492 | G13B_A | I20B_S | E18B_A | V24B_Q | 1.8E-07 | 5.7E-07 | 3.635E-07 | 9.970E-08 |
| 493 | Y10B_A | I20B_N | F19B_W | V24B_N | 1.4E-07 | 6.6E-07 | 3.635E-07 | 1.473E-07 |
| 494 | Y10B_A | G13B_W | I20B_N | F19B_Q | 8.1E-08 | 6.6E-07 | 3.640E-07 | 1.666E-07 |
| 495 | G13B_A | I20B_Q | G1B_R  | L23B_Q | 1.9E-07 | 8.6E-07 | 3.645E-07 | 1.479E-07 |
| 496 | G13B_A | F3B_A  | I20B_S | L23B_R | 1.6E-07 | 6.9E-07 | 3.645E-07 | 1.260E-07 |
| 497 | Y10B_A | I20B_Q | G1B_R  | L23B_R | 1.8E-07 | 6.0E-07 | 3.650E-07 | 1.314E-07 |
| 498 | G13B_A | I20B_S | F19B_A | V24B_T | 2.0E-07 | 5.2E-07 | 3.650E-07 | 1.023E-07 |
| 499 | G13B_A | V7B_A  | I20B_T | V24B_N | 2.1E-07 | 6.9E-07 | 3.650E-07 | 1.187E-07 |
| 500 | G13B_A | D6B_A  | I20B_S | V24B_Q | 1.7E-07 | 7.5E-07 | 3.655E-07 | 1.534E-07 |
| 501 | G13B_A | A16B_N | I20B_Q | F19B_Q | 7.2E-08 | 8.4E-07 | 3.656E-07 | 2.110E-07 |
| 502 | Y10B_A | I20B_N | V24B_Q | E12B_A | 2.0E-07 | 7.6E-07 | 3.660E-07 | 1.569E-07 |
| 503 | G13B_A | I20B_T | F19B_W | K17B_S | 1.4E-07 | 7.4E-07 | 3.670E-07 | 1.178E-07 |
| 504 | Y10B_A | E18B_T | I20B_S | F19B_Q | 1.5E-07 | 8.3E-07 | 3.675E-07 | 1.442E-07 |
| 505 | Y10B_A | I20B_Q | V24B_Q | G1B_A  | 2.2E-07 | 7.0E-07 | 3.675E-07 | 1.177E-07 |
| 506 | G13B_A | I20B_N | L23B_Q | F19B_A | 1.4E-07 | 6.7E-07 | 3.680E-07 | 1.376E-07 |
| 507 | G13B_A | F3B_A  | I20B_T | V24B_Q | 2.1E-07 | 5.4E-07 | 3.680E-07 | 9.737E-08 |
| 508 | G13B_A | V7B_A  | I20B_S | L23B_Q | 2.1E-07 | 6.8E-07 | 3.685E-07 | 1.135E-07 |
| 509 | Y10B_A | I20B_S | F19B_W | V24B_Q | 1.6E-07 | 5.7E-07 | 3.690E-07 | 1.150E-07 |
| 510 | G13B_A | I20B_S | V24B_N | G1B_A  | 1.7E-07 | 6.6E-07 | 3.700E-07 | 1.389E-07 |
| 511 | G13B_A | A16B_N | I20B_S | F19B_Q | 5.1E-08 | 8.7E-07 | 3.705E-07 | 1.952E-07 |
| 512 | G13B_A | A16B_N | I20B_S | V24B_Q | 6.2E-08 | 6.2E-07 | 3.706E-07 | 1.193E-07 |
| 513 | G13B_A | I20B_Q | K17B_S | E12B_A | 8.8E-08 | 8.1E-07 | 3.714E-07 | 1.598E-07 |
| 514 | G13B_A | I20B_N | E18B_A | L23B_R | 2.0E-07 | 7.3E-07 | 3.715E-07 | 1.414E-07 |
| 515 | G13B_A | I20B_T | E18B_A | L23B_R | 2.4E-07 | 6.4E-07 | 3.720E-07 | 9.720E-08 |
| 516 | G13B_A | I20B_T | K17B_S | E12B_A | 2.2E-07 | 5.9E-07 | 3.720E-07 | 9.237E-08 |
| 517 | G13B_A | F3B_A  | I20B_S | V24B_Q | 9.4E-08 | 5.7E-07 | 3.722E-07 | 1.166E-07 |
| 518 | G13B_A | I20B_T | G1B_R  | L23B_Q | 2.3E-07 | 7.8E-07 | 3.725E-07 | 1.398E-07 |
| 519 | G13B_A | L11B_A | I20B_S | V24B_T | 2.1E-07 | 6.7E-07 | 3.725E-07 | 1.154E-07 |

|     |        |        |        |        |         |         |           |           |
|-----|--------|--------|--------|--------|---------|---------|-----------|-----------|
| 520 | G13B_A | I20B_T | L23B_R | G1B_A  | 2.1E-07 | 6.1E-07 | 3.725E-07 | 1.146E-07 |
| 521 | Y10B_A | I20B_T | F19B_Q | K17B_S | 1.4E-07 | 8.8E-07 | 3.725E-07 | 1.638E-07 |
| 522 | Y10B_A | I20B_S | L23B_R | E12B_A | 1.3E-07 | 6.8E-07 | 3.730E-07 | 1.523E-07 |
| 523 | G13B_A | D6B_A  | I20B_T | V24B_T | 2.2E-07 | 6.4E-07 | 3.730E-07 | 1.121E-07 |
| 524 | G13B_A | V7B_A  | I20B_N | L23B_Q | 1.3E-07 | 6.7E-07 | 3.730E-07 | 1.270E-07 |
| 525 | G13B_A | I20B_S | L23B_R | F19B_A | 1.9E-07 | 9.1E-07 | 3.735E-07 | 1.553E-07 |
| 526 | G13B_A | I20B_N | E18B_T | E12B_A | 1.6E-07 | 5.6E-07 | 3.740E-07 | 1.094E-07 |
| 527 | G13B_A | I20B_T | L11B_A | F19B_Q | 1.7E-07 | 8.2E-07 | 3.740E-07 | 1.582E-07 |
| 528 | Y10B_A | I20B_T | F19B_Q | E12B_A | 9.3E-08 | 7.3E-07 | 3.746E-07 | 1.710E-07 |
| 529 | G13B_A | F3B_A  | I20B_T | L23B_Q | 1.7E-07 | 7.9E-07 | 3.755E-07 | 1.414E-07 |
| 530 | G13B_A | S8B_A  | I20B_N | V24B_N | 2.1E-07 | 6.0E-07 | 3.765E-07 | 9.970E-08 |
| 531 | Y10B_A | I20B_N | L23B_Q | E12B_A | 2.0E-07 | 7.8E-07 | 3.765E-07 | 1.683E-07 |
| 532 | Y10B_A | I20B_T | F19B_A | V24B_Q | 1.1E-07 | 6.0E-07 | 3.765E-07 | 1.268E-07 |
| 533 | G13B_A | E18B_T | I20B_S | E12B_A | 1.7E-07 | 7.2E-07 | 3.765E-07 | 1.457E-07 |
| 534 | G13B_A | I20B_N | L11B_A | F19B_Q | 1.6E-07 | 9.0E-07 | 3.775E-07 | 2.200E-07 |
| 535 | G13B_A | F3B_A  | I20B_S | F19B_Q | 2.0E-07 | 7.0E-07 | 3.775E-07 | 1.283E-07 |
| 536 | G13B_A | I20B_Q | E18B_A | L23B_Q | 1.3E-07 | 7.7E-07 | 3.785E-07 | 1.620E-07 |
| 537 | G13B_A | Y10B_A | I20B_Q | V24B_N | 1.9E-07 | 6.3E-07 | 3.785E-07 | 9.928E-08 |
| 538 | G13B_A | A16B_N | I20B_T | V24B_Q | 1.5E-07 | 6.8E-07 | 3.785E-07 | 1.372E-07 |
| 539 | G13B_A | I20B_S | L23B_R | G1B_A  | 2.6E-07 | 6.0E-07 | 3.790E-07 | 1.055E-07 |
| 540 | G13B_A | L11B_A | I20B_S | V24B_N | 2.0E-07 | 5.7E-07 | 3.790E-07 | 1.029E-07 |
| 541 | G13B_A | I20B_Q | V24B_T | T2B_A  | 1.7E-07 | 7.4E-07 | 3.790E-07 | 1.654E-07 |
| 542 | G13B_A | I20B_S | G1B_R  | F19B_Q | 1.6E-07 | 6.5E-07 | 3.800E-07 | 1.529E-07 |
| 543 | G13B_A | I20B_T | V24B_T | G1B_A  | 2.1E-07 | 7.7E-07 | 3.800E-07 | 1.259E-07 |
| 544 | G13B_A | I20B_T | L11B_A | V24B_T | 2.4E-07 | 7.8E-07 | 3.805E-07 | 1.230E-07 |
| 545 | G13B_A | I20B_S | S9B_A  | E12B_A | 1.8E-07 | 7.6E-07 | 3.805E-07 | 1.315E-07 |
| 546 | G13B_A | L11B_A | I20B_Q | K17B_S | 1.7E-07 | 6.7E-07 | 3.810E-07 | 1.311E-07 |
| 547 | G13B_A | D6B_A  | I20B_N | V24B_T | 2.2E-07 | 6.4E-07 | 3.810E-07 | 1.282E-07 |
| 548 | G13B_A | I20B_N | L23B_Q | G1B_A  | 1.5E-07 | 7.9E-07 | 3.810E-07 | 1.617E-07 |
| 549 | G13B_A | E18B_T | I20B_Q | E12B_A | 1.5E-07 | 7.7E-07 | 3.810E-07 | 1.634E-07 |
| 550 | G13B_A | V7B_A  | I20B_T | L23B_Q | 2.0E-07 | 4.9E-07 | 3.810E-07 | 7.867E-08 |
| 551 | G13B_A | A16B_N | I20B_T | V24B_T | 7.3E-08 | 7.0E-07 | 3.811E-07 | 1.659E-07 |
| 552 | Y10B_A | I20B_S | F19B_W | L23B_R | 1.2E-07 | 7.9E-07 | 3.815E-07 | 1.547E-07 |
| 553 | Y10B_A | I20B_S | F19B_W | V24B_T | 2.1E-07 | 5.0E-07 | 3.820E-07 | 8.458E-08 |
| 554 | Y10B_A | E18B_T | I20B_T | F19B_Q | 7.4E-08 | 6.6E-07 | 3.822E-07 | 1.711E-07 |
| 555 | G13B_A | A16B_N | I20B_N | L23B_Q | 1.1E-07 | 8.8E-07 | 3.825E-07 | 1.991E-07 |
| 556 | G13B_A | I20B_N | E18B_A | V24B_T | 1.8E-07 | 6.7E-07 | 3.830E-07 | 1.072E-07 |
| 557 | G13B_A | I20B_S | G1B_R  | V24B_T | 2.3E-07 | 9.8E-07 | 3.830E-07 | 1.678E-07 |
| 558 | Y10B_A | I20B_N | F19B_Q | E12B_A | 1.1E-07 | 9.1E-07 | 3.835E-07 | 1.798E-07 |
| 559 | G13B_A | I20B_S | K17B_S | E12B_A | 2.1E-07 | 6.0E-07 | 3.840E-07 | 9.757E-08 |
| 560 | G13B_A | V7B_A  | I20B_S | V24B_T | 2.4E-07 | 6.6E-07 | 3.850E-07 | 1.034E-07 |
| 561 | G13B_A | A16B_N | I20B_N | V24B_N | 1.5E-07 | 9.7E-07 | 3.855E-07 | 1.793E-07 |
| 562 | G13B_A | I20B_Q | T4B_A  | V24B_Q | 2.2E-07 | 6.3E-07 | 3.860E-07 | 1.276E-07 |
| 563 | Y10B_A | A16B_N | I20B_N | L23B_R | 1.3E-07 | 7.9E-07 | 3.865E-07 | 1.754E-07 |
| 564 | G13B_A | I20B_T | E18B_A | V24B_Q | 2.1E-07 | 6.7E-07 | 3.870E-07 | 1.148E-07 |
| 565 | Y10B_A | A16B_N | I20B_Q | V24B_N | 4.4E-08 | 7.9E-07 | 3.871E-07 | 2.138E-07 |
| 566 | Y10B_A | I20B_T | F19B_W | L23B_Q | 1.8E-07 | 8.4E-07 | 3.875E-07 | 1.592E-07 |
| 567 | G13B_A | I20B_T | L11B_A | V24B_Q | 1.7E-07 | 5.7E-07 | 3.880E-07 | 1.125E-07 |
| 568 | G13B_A | I20B_S | E18B_A | V24B_T | 2.6E-07 | 5.7E-07 | 3.880E-07 | 8.685E-08 |
| 569 | G13B_A | E18B_T | I20B_S | F19B_W | 1.4E-07 | 7.0E-07 | 3.880E-07 | 1.607E-07 |
| 570 | G13B_A | A16B_N | I20B_S | K17B_S | 6.0E-08 | 9.8E-07 | 3.888E-07 | 2.225E-07 |
| 571 | G13B_A | I20B_N | L11B_A | V24B_T | 2.4E-07 | 9.1E-07 | 3.890E-07 | 1.423E-07 |

|     |        |        |        |        |         |         |           |           |
|-----|--------|--------|--------|--------|---------|---------|-----------|-----------|
| 572 | G13B_A | F3B_A  | I20B_T | F19B_Q | 2.3E-07 | 5.5E-07 | 3.895E-07 | 1.012E-07 |
| 573 | G13B_A | I20B_N | V24B_T | G1B_A  | 1.7E-07 | 7.8E-07 | 3.895E-07 | 1.549E-07 |
| 574 | G13B_A | I20B_Q | L23B_Q | G1B_A  | 1.0E-07 | 6.7E-07 | 3.895E-07 | 1.548E-07 |
| 575 | G13B_A | D6B_A  | I20B_T | L23B_Q | 1.9E-07 | 7.2E-07 | 3.900E-07 | 1.397E-07 |
| 576 | Y10B_A | G13B_W | I20B_S | L23B_Q | 1.9E-07 | 7.3E-07 | 3.900E-07 | 1.301E-07 |
| 577 | G13B_A | A16B_N | I20B_S | V24B_N | 1.8E-07 | 8.2E-07 | 3.900E-07 | 1.470E-07 |
| 578 | S8B_A  | G13B_W | I20B_N | K17B_S | 1.9E-07 | 6.1E-07 | 3.905E-07 | 1.234E-07 |
| 579 | G13B_A | F3B_A  | I20B_T | L23B_R | 1.9E-07 | 5.8E-07 | 3.910E-07 | 8.404E-08 |
| 580 | Y10B_A | E18B_T | I20B_T | K17B_S | 2.0E-07 | 6.5E-07 | 3.910E-07 | 1.325E-07 |
| 581 | Y10B_A | G13B_W | I20B_T | K17B_S | 2.1E-07 | 5.7E-07 | 3.920E-07 | 1.068E-07 |
| 582 | Y10B_A | I20B_Q | G1B_R  | V24B_Q | 1.8E-07 | 7.3E-07 | 3.920E-07 | 1.594E-07 |
| 583 | G13B_A | F3B_A  | I20B_Q | L23B_Q | 1.8E-07 | 5.8E-07 | 3.925E-07 | 1.271E-07 |
| 584 | G13B_A | F3B_A  | I20B_S | L23B_Q | 1.2E-07 | 8.3E-07 | 3.935E-07 | 1.694E-07 |
| 585 | G13B_A | I20B_Q | V24B_Q | Q14B_A | 2.7E-07 | 6.7E-07 | 3.940E-07 | 1.049E-07 |
| 586 | S8B_A  | G13B_W | I20B_N | F19B_Q | 1.4E-07 | 6.6E-07 | 3.950E-07 | 1.454E-07 |
| 587 | G13B_A | V7B_A  | I20B_T | K17B_S | 2.9E-07 | 5.7E-07 | 3.960E-07 | 8.016E-08 |
| 588 | G13B_A | D6B_A  | I20B_N | L23B_R | 2.0E-07 | 6.2E-07 | 3.965E-07 | 1.288E-07 |
| 589 | Y10B_A | A16B_N | I20B_S | V24B_Q | 9.1E-08 | 9.3E-07 | 3.969E-07 | 2.092E-07 |
| 590 | Y10B_A | I20B_Q | F19B_W | K17B_S | 1.9E-07 | 7.9E-07 | 3.970E-07 | 1.680E-07 |
| 591 | Y10B_A | V7B_A  | I20B_Q | V24B_N | 1.8E-07 | 7.4E-07 | 3.970E-07 | 1.690E-07 |
| 592 | G13B_A | I20B_Q | V24B_T | Q14B_A | 1.4E-07 | 7.1E-07 | 3.970E-07 | 1.408E-07 |
| 593 | G13B_A | E18B_T | I20B_T | F19B_W | 2.1E-07 | 9.2E-07 | 3.985E-07 | 1.748E-07 |
| 594 | G13B_A | I20B_N | E18B_A | L23B_Q | 1.9E-07 | 6.4E-07 | 3.990E-07 | 1.279E-07 |
| 595 | Y10B_A | I20B_Q | K17B_S | E12B_A | 2.3E-07 | 7.4E-07 | 3.990E-07 | 1.476E-07 |
| 596 | G13B_A | S8B_A  | I20B_Q | V24B_N | 1.8E-07 | 7.1E-07 | 3.990E-07 | 1.377E-07 |
| 597 | G13B_A | I20B_N | S9B_A  | E12B_A | 1.9E-07 | 9.0E-07 | 3.990E-07 | 1.579E-07 |
| 598 | Y10B_A | I20B_T | L23B_Q | E12B_A | 2.3E-07 | 7.4E-07 | 3.995E-07 | 1.396E-07 |
| 599 | G13B_A | I20B_T | L23B_R | F19B_A | 2.2E-07 | 7.0E-07 | 3.995E-07 | 1.418E-07 |
| 600 | G13B_A | D6B_A  | I20B_S | L23B_R | 2.1E-07 | 8.5E-07 | 4.000E-07 | 1.577E-07 |
| 601 | Y10B_A | I20B_S | F19B_A | V24B_Q | 2.1E-07 | 9.4E-07 | 4.000E-07 | 1.711E-07 |
| 602 | G13B_A | F3B_A  | I20B_N | V24B_T | 2.1E-07 | 7.0E-07 | 4.010E-07 | 1.286E-07 |
| 603 | G13B_A | V7B_A  | I20B_N | F19B_Q | 1.2E-07 | 7.7E-07 | 4.010E-07 | 1.874E-07 |
| 604 | S8B_A  | G13B_W | I20B_Q | K17B_S | 2.1E-07 | 6.7E-07 | 4.015E-07 | 1.298E-07 |
| 605 | Y10B_A | L11B_A | I20B_Q | V24B_Q | 2.1E-07 | 7.0E-07 | 4.015E-07 | 1.654E-07 |
| 606 | Y10B_A | I20B_Q | E18B_A | V24B_N | 2.5E-07 | 5.5E-07 | 4.015E-07 | 8.561E-08 |
| 607 | G13B_A | I20B_T | E18B_A | V24B_T | 2.2E-07 | 6.4E-07 | 4.020E-07 | 1.134E-07 |
| 608 | Y10B_A | I20B_Q | F19B_A | V24B_N | 1.8E-07 | 8.0E-07 | 4.020E-07 | 1.508E-07 |
| 609 | Y10B_A | E18B_T | I20B_Q | F19B_Q | 8.6E-08 | 9.7E-07 | 4.028E-07 | 2.243E-07 |
| 610 | Y10B_A | I20B_Q | F19B_A | V24B_T | 2.7E-07 | 7.1E-07 | 4.030E-07 | 1.262E-07 |
| 611 | G13B_A | F3B_A  | I20B_T | V24B_T | 2.0E-07 | 6.6E-07 | 4.035E-07 | 1.351E-07 |
| 612 | G13B_A | I20B_Q | F19B_W | E12B_A | 1.2E-07 | 7.7E-07 | 4.040E-07 | 1.730E-07 |
| 613 | G13B_A | D6B_A  | I20B_Q | V24B_T | 2.3E-07 | 7.5E-07 | 4.045E-07 | 1.410E-07 |
| 614 | G13B_A | I20B_T | E18B_A | F19B_Q | 2.5E-07 | 6.1E-07 | 4.045E-07 | 1.107E-07 |
| 615 | Y10B_A | V7B_A  | I20B_Q | V24B_Q | 2.2E-07 | 6.3E-07 | 4.045E-07 | 1.315E-07 |
| 616 | Y10B_A | F3B_A  | I20B_S | V24B_N | 2.3E-07 | 6.3E-07 | 4.050E-07 | 1.007E-07 |
| 617 | G13B_A | I20B_N | T4B_A  | V24B_Q | 2.2E-07 | 1.1E-06 | 4.050E-07 | 1.889E-07 |
| 618 | G13B_A | I20B_N | F19B_W | E12B_A | 2.2E-07 | 7.0E-07 | 4.050E-07 | 1.281E-07 |
| 619 | Y10B_A | G13B_W | I20B_Q | S9B_A  | 1.9E-07 | 7.0E-07 | 4.055E-07 | 1.276E-07 |
| 620 | Y10B_A | I20B_T | L11B_A | V24B_N | 2.6E-07 | 7.0E-07 | 4.060E-07 | 1.217E-07 |
| 621 | G13B_A | I20B_Q | T2B_A  | V24B_N | 2.2E-07 | 7.5E-07 | 4.060E-07 | 1.554E-07 |
| 622 | Y10B_A | G13B_W | I20B_Q | K17B_S | 1.5E-07 | 7.9E-07 | 4.060E-07 | 1.906E-07 |
| 623 | G13B_A | F19B_Q | L23B_Q | V24B_N | 6.2E-08 | 8.8E-07 | 4.066E-07 | 1.901E-07 |

|     |        |        |        |        |         |         |           |           |
|-----|--------|--------|--------|--------|---------|---------|-----------|-----------|
| 624 | Y10B_A | A16B_N | I20B_N | V24B_N | 1.9E-07 | 6.7E-07 | 4.075E-07 | 1.274E-07 |
| 625 | Y10B_A | I20B_N | F19B_A | V24B_N | 2.6E-07 | 6.2E-07 | 4.075E-07 | 9.989E-08 |
| 626 | G13B_A | S8B_A  | I20B_Q | V24B_Q | 2.0E-07 | 8.2E-07 | 4.090E-07 | 1.756E-07 |
| 627 | Y10B_A | G13B_W | I20B_S | F19B_Q | 1.7E-07 | 9.2E-07 | 4.095E-07 | 1.667E-07 |
| 628 | G13B_A | I20B_Q | S5B_A  | V24B_N | 2.1E-07 | 7.8E-07 | 4.095E-07 | 1.581E-07 |
| 629 | G13B_A | V7B_A  | I20B_S | F19B_Q | 1.6E-07 | 9.0E-07 | 4.100E-07 | 1.609E-07 |
| 630 | Y10B_A | L11B_A | I20B_Q | L23B_R | 2.0E-07 | 1.1E-06 | 4.100E-07 | 2.077E-07 |
| 631 | G13B_A | F19B_Q | L23B_R | V24B_Q | 1.7E-07 | 7.6E-07 | 4.100E-07 | 1.366E-07 |
| 632 | Y10B_A | I20B_Q | V24B_N | G1B_A  | 1.5E-07 | 7.4E-07 | 4.100E-07 | 1.526E-07 |
| 633 | G13B_A | I20B_N | E18B_T | F19B_W | 1.2E-07 | 1.3E-06 | 4.105E-07 | 2.554E-07 |
| 634 | G13B_A | I20B_T | Q14B_A | V24B_N | 1.8E-07 | 7.1E-07 | 4.110E-07 | 1.089E-07 |
| 635 | G13B_A | I20B_N | F19B_Q | G1B_A  | 1.4E-07 | 7.0E-07 | 4.110E-07 | 1.347E-07 |
| 636 | G13B_A | D6B_A  | I20B_S | V24B_T | 1.9E-07 | 7.5E-07 | 4.110E-07 | 1.496E-07 |
| 637 | G13B_A | I20B_S | E18B_A | L23B_R | 2.1E-07 | 9.3E-07 | 4.115E-07 | 1.614E-07 |
| 638 | Y10B_A | E18B_T | I20B_Q | S9B_A  | 1.9E-07 | 7.6E-07 | 4.125E-07 | 1.645E-07 |
| 639 | Y10B_A | I20B_T | L23B_R | G1B_A  | 1.5E-07 | 9.2E-07 | 4.125E-07 | 1.736E-07 |
| 640 | Y10B_A | I20B_Q | F19B_Q | E12B_A | 1.6E-07 | 7.6E-07 | 4.125E-07 | 1.836E-07 |
| 641 | G13B_A | L11B_A | I20B_S | F19B_Q | 1.4E-07 | 8.1E-07 | 4.130E-07 | 1.456E-07 |
| 642 | Y10B_A | G13B_W | I20B_S | F19B_W | 1.3E-07 | 6.2E-07 | 4.140E-07 | 1.063E-07 |
| 643 | G13B_A | I20B_Q | S5B_A  | L23B_R | 1.7E-07 | 1.0E-06 | 4.140E-07 | 2.261E-07 |
| 644 | Y10B_A | I20B_N | V24B_Q | G1B_A  | 2.8E-07 | 6.0E-07 | 4.145E-07 | 8.976E-08 |
| 645 | Y10B_A | I20B_Q | G1B_R  | V24B_N | 1.7E-07 | 6.9E-07 | 4.145E-07 | 1.351E-07 |
| 646 | G13B_A | I20B_N | V24B_T | Q14B_A | 2.3E-07 | 6.4E-07 | 4.150E-07 | 1.186E-07 |
| 647 | G13B_A | A16B_N | I20B_T | L23B_Q | 1.2E-07 | 1.2E-06 | 4.155E-07 | 2.393E-07 |
| 648 | G13B_A | A16B_N | I20B_S | L23B_Q | 1.2E-07 | 8.4E-07 | 4.160E-07 | 2.176E-07 |
| 649 | S8B_A  | G13B_W | I20B_S | K17B_S | 1.8E-07 | 7.1E-07 | 4.160E-07 | 1.434E-07 |
| 650 | Y10B_A | I20B_T | G1B_R  | V24B_T | 2.4E-07 | 9.5E-07 | 4.160E-07 | 1.534E-07 |
| 651 | Y10B_A | G13B_W | E18B_T | I20B_T | 2.3E-07 | 6.7E-07 | 4.160E-07 | 1.216E-07 |
| 652 | G13B_A | Y10B_A | I20B_S | V24B_N | 2.7E-07 | 7.4E-07 | 4.160E-07 | 1.132E-07 |
| 653 | G13B_A | Y10B_A | I20B_T | V24B_N | 1.9E-07 | 6.3E-07 | 4.160E-07 | 1.219E-07 |
| 654 | G13B_A | I20B_N | L23B_R | F19B_A | 2.5E-07 | 6.7E-07 | 4.165E-07 | 1.320E-07 |
| 655 | Y10B_A | I20B_Q | V24B_T | G1B_A  | 1.5E-07 | 7.1E-07 | 4.165E-07 | 1.333E-07 |
| 656 | Y10B_A | I20B_S | V24B_N | G1B_A  | 2.6E-07 | 6.0E-07 | 4.165E-07 | 1.049E-07 |
| 657 | G13B_A | I20B_T | F19B_W | S9B_A  | 2.0E-07 | 8.8E-07 | 4.170E-07 | 1.786E-07 |
| 658 | G13B_A | I20B_N | F19B_W | K17B_S | 2.3E-07 | 6.7E-07 | 4.175E-07 | 1.324E-07 |
| 659 | Y10B_A | I20B_T | G1B_R  | V24B_Q | 2.8E-07 | 6.5E-07 | 4.175E-07 | 1.096E-07 |
| 660 | Y10B_A | I20B_N | G1B_R  | V24B_N | 1.9E-07 | 7.0E-07 | 4.180E-07 | 1.539E-07 |
| 661 | Y10B_A | I20B_T | L23B_Q | F19B_A | 2.1E-07 | 7.6E-07 | 4.180E-07 | 1.724E-07 |
| 662 | G13B_A | L11B_A | I20B_S | L23B_R | 2.6E-07 | 7.0E-07 | 4.190E-07 | 1.326E-07 |
| 663 | Y10B_A | G13B_W | I20B_Q | F19B_W | 1.5E-07 | 9.5E-07 | 4.195E-07 | 1.822E-07 |
| 664 | G13B_A | I20B_T | V24B_T | T2B_A  | 1.9E-07 | 1.0E-06 | 4.195E-07 | 1.671E-07 |
| 665 | G13B_A | D6B_A  | I20B_S | V24B_N | 3.0E-07 | 5.8E-07 | 4.195E-07 | 8.332E-08 |
| 666 | Y10B_A | I20B_N | E18B_T | S9B_A  | 2.0E-07 | 8.0E-07 | 4.200E-07 | 1.647E-07 |
| 667 | G13B_A | I20B_T | F19B_Q | G1B_A  | 1.8E-07 | 6.6E-07 | 4.205E-07 | 1.350E-07 |
| 668 | Y10B_A | I20B_T | E18B_A | L23B_R | 1.9E-07 | 6.9E-07 | 4.205E-07 | 1.509E-07 |
| 669 | Y10B_A | G13B_W | E18B_T | I20B_Q | 2.0E-07 | 1.0E-06 | 4.210E-07 | 2.077E-07 |
| 670 | Y10B_A | E18B_T | I20B_S | S9B_A  | 2.1E-07 | 6.8E-07 | 4.210E-07 | 1.266E-07 |
| 671 | Y10B_A | I20B_Q | L23B_Q | G1B_A  | 1.8E-07 | 7.6E-07 | 4.215E-07 | 1.837E-07 |
| 672 | Y10B_A | I20B_S | G1B_R  | V24B_Q | 2.3E-07 | 7.3E-07 | 4.215E-07 | 1.185E-07 |
| 673 | Y10B_A | V7B_A  | I20B_T | V24B_N | 2.8E-07 | 7.8E-07 | 4.215E-07 | 1.368E-07 |
| 674 | Y10B_A | V7B_A  | I20B_N | V24B_Q | 2.3E-07 | 8.3E-07 | 4.215E-07 | 1.473E-07 |
| 675 | S8B_A  | G13B_W | E18B_T | I20B_S | 1.7E-07 | 7.9E-07 | 4.215E-07 | 1.710E-07 |

|     |        |        |        |        |         |         |           |           |
|-----|--------|--------|--------|--------|---------|---------|-----------|-----------|
| 676 | Y10B_A | D6B_A  | I20B_N | L23B_R | 2.2E-07 | 8.1E-07 | 4.225E-07 | 1.564E-07 |
| 677 | G13B_A | L23B_Q | K17B_S | V24B_T | 2.4E-07 | 8.9E-07 | 4.225E-07 | 1.707E-07 |
| 678 | G13B_A | E18B_T | I20B_T | E12B_A | 2.3E-07 | 1.1E-06 | 4.230E-07 | 1.993E-07 |
| 679 | S8B_A  | G13B_W | I20B_Q | F19B_W | 1.8E-07 | 8.3E-07 | 4.230E-07 | 1.889E-07 |
| 680 | G13B_A | I20B_N | T4B_A  | V24B_T | 2.8E-07 | 7.0E-07 | 4.235E-07 | 1.000E-07 |
| 681 | Y10B_A | E18B_T | I20B_S | K17B_S | 2.3E-07 | 8.5E-07 | 4.235E-07 | 1.844E-07 |
| 682 | Y10B_A | I20B_Q | G1B_R  | V24B_T | 1.8E-07 | 9.1E-07 | 4.235E-07 | 1.847E-07 |
| 683 | Y10B_A | G13B_W | I20B_N | E18B_T | 2.3E-07 | 7.4E-07 | 4.235E-07 | 1.409E-07 |
| 684 | Y10B_A | A16B_N | I20B_Q | L23B_Q | 7.1E-08 | 8.9E-07 | 4.240E-07 | 2.446E-07 |
| 685 | Y10B_A | G13B_W | E18B_T | I20B_S | 2.3E-07 | 6.3E-07 | 4.240E-07 | 1.196E-07 |
| 686 | Y10B_A | I20B_S | L23B_Q | E12B_A | 2.7E-07 | 6.7E-07 | 4.240E-07 | 1.064E-07 |
| 687 | G13B_A | I20B_Q | G1B_R  | S9B_A  | 1.9E-07 | 9.1E-07 | 4.245E-07 | 1.774E-07 |
| 688 | G13B_A | F3B_A  | I20B_N | K17B_S | 1.8E-07 | 9.2E-07 | 4.255E-07 | 2.065E-07 |
| 689 | G13B_A | F19B_Q | K17B_S | V24B_Q | 1.6E-07 | 7.5E-07 | 4.260E-07 | 1.621E-07 |
| 690 | G13B_A | E18B_T | I20B_Q | F19B_W | 1.3E-07 | 1.1E-06 | 4.260E-07 | 2.742E-07 |
| 691 | G13B_A | I20B_Q | S5B_A  | V24B_T | 2.3E-07 | 7.4E-07 | 4.265E-07 | 1.474E-07 |
| 692 | G13B_A | S8B_A  | I20B_Q | F19B_Q | 1.6E-07 | 8.7E-07 | 4.265E-07 | 2.009E-07 |
| 693 | Y10B_A | L11B_A | I20B_Q | L23B_Q | 1.7E-07 | 1.0E-06 | 4.270E-07 | 1.980E-07 |
| 694 | Y10B_A | I20B_Q | G1B_R  | L23B_Q | 2.2E-07 | 8.7E-07 | 4.270E-07 | 1.753E-07 |
| 695 | G13B_A | I20B_T | V24B_Q | T2B_A  | 2.6E-07 | 6.0E-07 | 4.275E-07 | 9.239E-08 |
| 696 | Y10B_A | I20B_S | F19B_Q | E12B_A | 1.8E-07 | 9.9E-07 | 4.275E-07 | 2.310E-07 |
| 697 | Y10B_A | D6B_A  | I20B_Q | F19B_Q | 2.1E-07 | 8.0E-07 | 4.280E-07 | 1.554E-07 |
| 698 | G13B_A | I20B_Q | Q14B_A | V24B_N | 2.2E-07 | 7.9E-07 | 4.285E-07 | 1.555E-07 |
| 699 | G13B_A | F19B_Q | L23B_R | V24B_N | 1.8E-07 | 8.6E-07 | 4.290E-07 | 1.725E-07 |
| 700 | G13B_A | I20B_S | E18B_A | L23B_Q | 2.2E-07 | 7.2E-07 | 4.290E-07 | 1.245E-07 |
| 701 | G13B_A | D6B_A  | I20B_T | L23B_R | 2.4E-07 | 7.2E-07 | 4.290E-07 | 1.389E-07 |
| 702 | Y10B_A | G13B_W | I20B_S | K17B_S | 2.1E-07 | 8.3E-07 | 4.290E-07 | 1.641E-07 |
| 703 | Y10B_A | I20B_Q | E18B_A | V24B_Q | 2.1E-07 | 7.6E-07 | 4.300E-07 | 1.344E-07 |
| 704 | G13B_A | S8B_A  | I20B_T | V24B_N | 2.2E-07 | 7.3E-07 | 4.300E-07 | 1.185E-07 |
| 705 | Y10B_A | V7B_A  | I20B_Q | L23B_R | 2.0E-07 | 8.7E-07 | 4.305E-07 | 1.664E-07 |
| 706 | S8B_A  | D6B_A  | I20B_T | V24B_N | 1.7E-07 | 6.8E-07 | 4.310E-07 | 1.330E-07 |
| 707 | G13B_A | E18B_T | L23B_R | V24B_T | 2.6E-07 | 6.1E-07 | 4.315E-07 | 1.102E-07 |
| 708 | G13B_A | I20B_N | V24B_Q | Q14B_A | 1.8E-07 | 7.4E-07 | 4.315E-07 | 1.374E-07 |
| 709 | G13B_A | V7B_A  | I20B_S | L23B_R | 2.5E-07 | 7.5E-07 | 4.315E-07 | 1.595E-07 |
| 710 | Y10B_A | I20B_N | F19B_W | K17B_S | 2.3E-07 | 7.1E-07 | 4.325E-07 | 1.429E-07 |
| 711 | G13B_A | I20B_T | V24B_Q | Q14B_A | 2.6E-07 | 6.3E-07 | 4.325E-07 | 1.163E-07 |
| 712 | G13B_A | I20B_N | L11B_A | K17B_S | 2.6E-07 | 6.7E-07 | 4.330E-07 | 1.273E-07 |
| 713 | Y10B_A | I20B_S | F19B_W | K17B_S | 1.8E-07 | 8.3E-07 | 4.330E-07 | 1.740E-07 |
| 714 | Y10B_A | G13B_W | I20B_T | S9B_A  | 2.7E-07 | 6.0E-07 | 4.330E-07 | 8.125E-08 |
| 715 | S8B_A  | G13B_W | I20B_N | S9B_A  | 2.6E-07 | 7.0E-07 | 4.330E-07 | 1.185E-07 |
| 716 | Y10B_A | I20B_Q | L23B_R | F19B_A | 1.7E-07 | 7.9E-07 | 4.335E-07 | 1.738E-07 |
| 717 | G13B_A | D6B_A  | I20B_N | L23B_Q | 2.3E-07 | 6.2E-07 | 4.335E-07 | 1.281E-07 |
| 718 | G13B_A | I20B_N | G1B_R  | F19B_Q | 1.6E-07 | 8.1E-07 | 4.335E-07 | 1.780E-07 |
| 719 | Y10B_A | D6B_A  | I20B_N | V24B_Q | 2.4E-07 | 6.2E-07 | 4.335E-07 | 9.472E-08 |
| 720 | Y10B_A | I20B_N | L11B_A | V24B_T | 2.7E-07 | 6.7E-07 | 4.345E-07 | 1.151E-07 |
| 721 | Y10B_A | I20B_N | L11B_A | V24B_Q | 2.2E-07 | 6.0E-07 | 4.345E-07 | 1.075E-07 |
| 722 | Y10B_A | I20B_N | V24B_N | G1B_A  | 2.0E-07 | 8.3E-07 | 4.345E-07 | 1.547E-07 |
| 723 | Y10B_A | F3B_A  | I20B_Q | V24B_Q | 2.6E-07 | 7.0E-07 | 4.350E-07 | 1.097E-07 |
| 724 | Y10B_A | I20B_T | S9B_A  | K17B_S | 2.4E-07 | 6.9E-07 | 4.350E-07 | 1.366E-07 |
| 725 | Y10B_A | I20B_T | F19B_W | K17B_S | 1.8E-07 | 7.9E-07 | 4.360E-07 | 1.514E-07 |
| 726 | Y10B_A | L11B_A | I20B_S | V24B_Q | 2.3E-07 | 6.3E-07 | 4.370E-07 | 1.241E-07 |
| 727 | G13B_A | I20B_T | T2B_A  | V24B_N | 2.7E-07 | 7.7E-07 | 4.370E-07 | 1.102E-07 |

|     |        |        |        |        |         |         |           |           |
|-----|--------|--------|--------|--------|---------|---------|-----------|-----------|
| 728 | G13B_A | I20B_N | L23B_R | T2B_A  | 2.1E-07 | 8.8E-07 | 4.370E-07 | 1.970E-07 |
| 729 | Y10B_A | F3B_A  | I20B_Q | V24B_N | 1.2E-07 | 1.2E-06 | 4.370E-07 | 2.339E-07 |
| 730 | G13B_A | I20B_T | L23B_R | Q14B_A | 2.1E-07 | 7.5E-07 | 4.370E-07 | 1.350E-07 |
| 731 | G13B_A | I20B_N | Q14B_A | V24B_N | 2.2E-07 | 7.0E-07 | 4.380E-07 | 1.343E-07 |
| 732 | G13B_A | E18B_T | L23B_R | V24B_N | 1.4E-07 | 7.9E-07 | 4.380E-07 | 1.735E-07 |
| 733 | G13B_A | Y10B_A | I20B_Q | V24B_T | 2.7E-07 | 8.7E-07 | 4.385E-07 | 1.631E-07 |
| 734 | Y10B_A | I20B_N | F19B_A | V24B_Q | 2.3E-07 | 6.4E-07 | 4.385E-07 | 1.218E-07 |
| 735 | G13B_A | Y10B_A | I20B_T | L23B_R | 2.1E-07 | 8.2E-07 | 4.390E-07 | 1.466E-07 |
| 736 | G13B_A | I20B_Q | G1B_R  | K17B_S | 1.6E-07 | 1.1E-06 | 4.390E-07 | 2.477E-07 |
| 737 | Y10B_A | G13B_W | I20B_T | E12B_A | 2.6E-07 | 6.8E-07 | 4.390E-07 | 1.112E-07 |
| 738 | G13B_A | E18B_T | L23B_Q | V24B_N | 2.4E-07 | 8.8E-07 | 4.390E-07 | 1.749E-07 |
| 739 | G13B_A | I20B_N | S5B_A  | L23B_R | 2.7E-07 | 1.0E-06 | 4.390E-07 | 1.610E-07 |
| 740 | S8B_A  | G13B_W | I20B_N | E18B_T | 2.8E-07 | 7.4E-07 | 4.390E-07 | 1.264E-07 |
| 741 | G13B_A | I20B_Q | T4B_A  | V24B_N | 2.3E-07 | 7.3E-07 | 4.390E-07 | 1.501E-07 |
| 742 | G13B_A | E18B_T | I20B_Q | F19B_A | 2.2E-07 | 8.8E-07 | 4.395E-07 | 1.914E-07 |
| 743 | G13B_A | F19B_W | L23B_Q | V24B_Q | 2.0E-07 | 9.2E-07 | 4.395E-07 | 1.744E-07 |
| 744 | G13B_A | D6B_A  | I20B_N | F19B_Q | 1.3E-07 | 1.0E-06 | 4.400E-07 | 2.076E-07 |
| 745 | G13B_A | S8B_A  | I20B_T | V24B_Q | 3.0E-07 | 6.0E-07 | 4.400E-07 | 9.268E-08 |
| 746 | G13B_A | L23B_R | K17B_S | V24B_Q | 1.4E-07 | 7.6E-07 | 4.400E-07 | 1.647E-07 |
| 747 | G13B_A | I20B_T | G1B_R  | K17B_S | 2.7E-07 | 7.8E-07 | 4.405E-07 | 1.234E-07 |
| 748 | G13B_A | Y10B_A | I20B_Q | L23B_R | 1.7E-07 | 8.7E-07 | 4.405E-07 | 2.043E-07 |
| 749 | G13B_A | A16B_N | I20B_Q | S9B_A  | 4.8E-08 | 8.7E-07 | 4.409E-07 | 2.339E-07 |
| 750 | Y10B_A | I20B_N | F19B_W | L23B_R | 1.8E-07 | 1.1E-06 | 4.410E-07 | 1.949E-07 |
| 751 | Y10B_A | I20B_Q | L23B_R | G1B_A  | 1.8E-07 | 8.9E-07 | 4.415E-07 | 1.922E-07 |
| 752 | G13B_A | I20B_T | L23B_R | T2B_A  | 2.9E-07 | 6.5E-07 | 4.415E-07 | 1.235E-07 |
| 753 | G13B_A | E18B_T | L23B_R | V24B_Q | 2.3E-07 | 8.4E-07 | 4.420E-07 | 1.562E-07 |
| 754 | S8B_A  | D6B_A  | I20B_Q | V24B_N | 1.7E-07 | 8.9E-07 | 4.420E-07 | 1.806E-07 |
| 755 | Y10B_A | I20B_N | K17B_S | E12B_A | 2.3E-07 | 6.6E-07 | 4.420E-07 | 1.413E-07 |
| 756 | G13B_A | I20B_N | K17B_S | F19B_A | 1.5E-07 | 6.9E-07 | 4.425E-07 | 1.399E-07 |
| 757 | Y10B_A | E18B_T | I20B_Q | F19B_W | 1.9E-07 | 1.2E-06 | 4.425E-07 | 2.420E-07 |
| 758 | Y10B_A | D6B_A  | I20B_S | L23B_R | 2.6E-07 | 8.9E-07 | 4.425E-07 | 1.391E-07 |
| 759 | G13B_A | Y10B_A | I20B_N | L23B_R | 1.8E-07 | 1.0E-06 | 4.430E-07 | 1.924E-07 |
| 760 | Y10B_A | V7B_A  | I20B_N | V24B_N | 2.7E-07 | 6.3E-07 | 4.430E-07 | 9.937E-08 |
| 761 | G13B_A | I20B_Q | T4B_A  | V24B_T | 2.0E-07 | 7.4E-07 | 4.435E-07 | 1.454E-07 |
| 762 | G13B_A | I20B_Q | V24B_Q | T2B_A  | 2.6E-07 | 7.0E-07 | 4.435E-07 | 1.252E-07 |
| 763 | G13B_A | I20B_T | L23B_Q | T2B_A  | 2.0E-07 | 8.0E-07 | 4.440E-07 | 1.524E-07 |
| 764 | G13B_A | F3B_A  | I20B_Q | K17B_S | 1.7E-07 | 9.7E-07 | 4.455E-07 | 1.996E-07 |
| 765 | G13B_A | I20B_S | V24B_Q | Q14B_A | 2.3E-07 | 6.6E-07 | 4.460E-07 | 1.186E-07 |
| 766 | Y10B_A | L11B_A | I20B_Q | V24B_N | 2.2E-07 | 6.3E-07 | 4.465E-07 | 1.247E-07 |
| 767 | S8B_A  | G13B_W | E18B_T | I20B_Q | 1.9E-07 | 9.3E-07 | 4.465E-07 | 1.936E-07 |
| 768 | G13B_A | I20B_Q | K17B_S | F19B_A | 1.8E-07 | 7.6E-07 | 4.465E-07 | 1.756E-07 |
| 769 | G13B_A | I20B_S | S5B_A  | V24B_Q | 2.7E-07 | 6.3E-07 | 4.470E-07 | 1.048E-07 |
| 770 | S8B_A  | V7B_A  | I20B_N | V24B_N | 3.2E-07 | 6.0E-07 | 4.478E-07 | 8.614E-08 |
| 771 | G13B_A | Y10B_A | I20B_T | V24B_Q | 2.2E-07 | 8.8E-07 | 4.485E-07 | 1.730E-07 |
| 772 | Y10B_A | G13B_W | I20B_N | K17B_S | 1.4E-07 | 6.7E-07 | 4.485E-07 | 1.336E-07 |
| 773 | Y10B_A | V7B_A  | I20B_T | L23B_R | 2.5E-07 | 6.4E-07 | 4.490E-07 | 1.012E-07 |
| 774 | G13B_A | I20B_N | S5B_A  | V24B_N | 3.2E-07 | 6.3E-07 | 4.495E-07 | 1.123E-07 |
| 775 | Y10B_A | I20B_N | G1B_R  | V24B_Q | 2.5E-07 | 7.4E-07 | 4.500E-07 | 1.445E-07 |
| 776 | Y10B_A | I20B_Q | L23B_Q | F19B_A | 2.0E-07 | 1.1E-06 | 4.500E-07 | 2.139E-07 |
| 777 | G13B_A | S9B_A  | L23B_R | V24B_T | 2.6E-07 | 6.0E-07 | 4.500E-07 | 1.029E-07 |
| 778 | G13B_A | F3B_A  | I20B_N | F19B_Q | 2.4E-07 | 7.7E-07 | 4.500E-07 | 1.591E-07 |
| 779 | Y10B_A | E18B_T | I20B_Q | E12B_A | 2.4E-07 | 1.2E-06 | 4.500E-07 | 2.113E-07 |



|     |        |        |        |        |         |         |           |           |
|-----|--------|--------|--------|--------|---------|---------|-----------|-----------|
| 780 | G13B_A | A16B_N | I20B_Q | K17B_S | 7.4E-08 | 1.0E-06 | 4.506E-07 | 2.511E-07 |
| 781 | S8B_A  | V7B_A  | I20B_N | V24B_T | 3.2E-07 | 6.3E-07 | 4.509E-07 | 1.173E-07 |
| 782 | Y10B_A | I20B_T | F19B_A | V24B_T | 2.4E-07 | 6.8E-07 | 4.515E-07 | 1.266E-07 |
| 783 | S8B_A  | G13B_W | I20B_T | K17B_S | 2.5E-07 | 6.7E-07 | 4.515E-07 | 1.450E-07 |
| 784 | G13B_A | E18B_T | L11B_A | I20B_Q | 2.2E-07 | 8.7E-07 | 4.520E-07 | 1.737E-07 |
| 785 | G13B_A | Y10B_A | I20B_Q | V24B_Q | 2.0E-07 | 7.0E-07 | 4.520E-07 | 1.328E-07 |
| 786 | G13B_A | F19B_W | L23B_Q | V24B_N | 1.7E-07 | 8.2E-07 | 4.525E-07 | 1.846E-07 |
| 787 | Y10B_A | F3B_A  | I20B_Q | V24B_T | 2.6E-07 | 8.3E-07 | 4.535E-07 | 1.580E-07 |
| 788 | S8B_A  | G13B_W | I20B_Q | E12B_A | 2.9E-07 | 6.5E-07 | 4.535E-07 | 1.172E-07 |
| 789 | Y10B_A | I20B_T | V24B_N | G1B_A  | 3.2E-07 | 8.3E-07 | 4.535E-07 | 1.288E-07 |
| 790 | G13B_A | I20B_Q | T4B_A  | L23B_Q | 2.2E-07 | 7.6E-07 | 4.540E-07 | 1.560E-07 |
| 791 | Y10B_A | I20B_N | S9B_A  | K17B_S | 2.2E-07 | 8.0E-07 | 4.540E-07 | 1.582E-07 |
| 792 | G13B_A | I20B_Q | G1B_R  | F19B_W | 2.4E-07 | 9.4E-07 | 4.545E-07 | 1.651E-07 |
| 793 | S8B_A  | V7B_A  | I20B_N | V24B_Q | 2.7E-07 | 6.3E-07 | 4.546E-07 | 1.232E-07 |
| 794 | Y10B_A | E18B_T | I20B_T | S9B_A  | 2.3E-07 | 7.6E-07 | 4.550E-07 | 1.493E-07 |
| 795 | G13B_A | S8B_A  | I20B_N | L23B_R | 2.1E-07 | 8.8E-07 | 4.555E-07 | 1.850E-07 |
| 796 | G13B_A | I20B_S | T4B_A  | V24B_N | 2.6E-07 | 7.8E-07 | 4.555E-07 | 1.508E-07 |
| 797 | Y10B_A | V7B_A  | I20B_S | V24B_Q | 2.2E-07 | 8.3E-07 | 4.555E-07 | 1.658E-07 |
| 798 | G13B_A | I20B_T | E18B_A | L23B_Q | 2.1E-07 | 7.3E-07 | 4.560E-07 | 1.762E-07 |
| 799 | S8B_A  | D6B_A  | I20B_N | V24B_N | 1.5E-07 | 1.0E-06 | 4.560E-07 | 1.795E-07 |
| 800 | Y10B_A | S8B_A  | I20B_N | V24B_N | 2.2E-07 | 7.1E-07 | 4.560E-07 | 1.431E-07 |
| 801 | G13B_A | I20B_Q | T4B_A  | F19B_Q | 1.1E-07 | 7.4E-07 | 4.565E-07 | 2.081E-07 |
| 802 | G13B_A | I20B_N | K17B_S | G1B_A  | 2.1E-07 | 1.0E-06 | 4.565E-07 | 1.832E-07 |
| 803 | G13B_A | L11B_A | I20B_S | L23B_Q | 2.0E-07 | 7.9E-07 | 4.565E-07 | 1.426E-07 |
| 804 | G13B_A | I20B_Q | F19B_Q | G1B_A  | 1.7E-07 | 7.7E-07 | 4.570E-07 | 1.911E-07 |
| 805 | G13B_A | I20B_T | K17B_S | G1B_A  | 2.1E-07 | 6.1E-07 | 4.575E-07 | 1.224E-07 |
| 806 | G13B_A | I20B_S | F19B_Q | G1B_A  | 1.8E-07 | 1.0E-06 | 4.575E-07 | 2.004E-07 |
| 807 | Y10B_A | I20B_N | E18B_A | L23B_R | 2.6E-07 | 7.2E-07 | 4.575E-07 | 1.446E-07 |
| 808 | Y10B_A | A16B_N | I20B_Q | V24B_Q | 9.5E-08 | 8.6E-07 | 4.578E-07 | 2.138E-07 |
| 809 | Y10B_A | I20B_S | F19B_A | V24B_N | 2.2E-07 | 9.8E-07 | 4.580E-07 | 1.733E-07 |
| 810 | G13B_A | S8B_A  | I20B_S | V24B_Q | 1.9E-07 | 7.4E-07 | 4.580E-07 | 1.229E-07 |
| 811 | G13B_A | I20B_N | T2B_A  | V24B_N | 2.7E-07 | 7.1E-07 | 4.580E-07 | 1.246E-07 |
| 812 | Y10B_A | A16B_N | I20B_T | V24B_Q | 1.3E-07 | 9.2E-07 | 4.585E-07 | 1.949E-07 |
| 813 | Y10B_A | V7B_A  | I20B_Q | V24B_T | 2.6E-07 | 8.7E-07 | 4.585E-07 | 1.645E-07 |
| 814 | G13B_A | I20B_S | F19B_W | E12B_A | 1.8E-07 | 7.2E-07 | 4.585E-07 | 1.313E-07 |
| 815 | G13B_A | S8B_A  | I20B_T | V24B_T | 2.6E-07 | 6.6E-07 | 4.585E-07 | 9.281E-08 |
| 816 | Y10B_A | F3B_A  | I20B_T | L23B_R | 2.1E-07 | 7.5E-07 | 4.590E-07 | 1.559E-07 |
| 817 | Y10B_A | V7B_A  | I20B_Q | L23B_Q | 1.9E-07 | 8.9E-07 | 4.590E-07 | 1.916E-07 |
| 818 | G13B_A | S8B_A  | I20B_Q | L23B_R | 2.0E-07 | 7.6E-07 | 4.595E-07 | 1.705E-07 |
| 819 | G13B_A | D6B_A  | I20B_S | F19B_Q | 2.6E-07 | 8.9E-07 | 4.610E-07 | 1.667E-07 |
| 820 | Y10B_A | L11B_A | I20B_S | V24B_T | 3.2E-07 | 6.3E-07 | 4.620E-07 | 8.685E-08 |
| 821 | Y10B_A | I20B_N | L23B_R | G1B_A  | 2.4E-07 | 8.7E-07 | 4.620E-07 | 1.914E-07 |
| 822 | G13B_A | I20B_N | S5B_A  | V24B_Q | 1.6E-07 | 8.7E-07 | 4.625E-07 | 1.516E-07 |
| 823 | G13B_A | I20B_N | S5B_A  | V24B_T | 2.4E-07 | 7.8E-07 | 4.625E-07 | 1.369E-07 |
| 824 | G13B_A | Y10B_A | I20B_N | V24B_Q | 2.4E-07 | 1.0E-06 | 4.630E-07 | 1.632E-07 |
| 825 | Y10B_A | V7B_A  | I20B_S | V24B_T | 2.3E-07 | 8.6E-07 | 4.630E-07 | 1.701E-07 |
| 826 | G13B_A | I20B_S | L23B_R | Q14B_A | 2.5E-07 | 1.0E-06 | 4.630E-07 | 1.669E-07 |
| 827 | Y10B_A | I20B_T | K17B_S | E12B_A | 2.8E-07 | 7.4E-07 | 4.630E-07 | 1.419E-07 |
| 828 | G13B_A | I20B_T | T4B_A  | V24B_N | 2.8E-07 | 7.4E-07 | 4.635E-07 | 1.265E-07 |
| 829 | G13B_A | I20B_T | F19B_Q | T2B_A  | 3.0E-07 | 7.9E-07 | 4.635E-07 | 1.383E-07 |
| 830 | G13B_A | I20B_T | S5B_A  | V24B_N | 2.4E-07 | 6.7E-07 | 4.635E-07 | 1.203E-07 |
| 831 | Y10B_A | F3B_A  | I20B_Q | L23B_R | 1.7E-07 | 7.5E-07 | 4.640E-07 | 1.629E-07 |

|     |        |        |        |        |         |         |           |           |
|-----|--------|--------|--------|--------|---------|---------|-----------|-----------|
| 832 | Y10B_A | D6B_A  | I20B_S | V24B_N | 2.0E-07 | 7.2E-07 | 4.640E-07 | 1.262E-07 |
| 833 | Y10B_A | I20B_T | E18B_A | V24B_Q | 2.8E-07 | 6.5E-07 | 4.645E-07 | 9.517E-08 |
| 834 | Y10B_A | I20B_N | E18B_T | E12B_A | 2.5E-07 | 7.4E-07 | 4.645E-07 | 1.514E-07 |
| 835 | Y10B_A | I20B_N | E18B_T | F19B_Q | 1.2E-07 | 1.4E-06 | 4.645E-07 | 2.743E-07 |
| 836 | Y10B_A | F3B_A  | I20B_S | L23B_R | 2.8E-07 | 7.2E-07 | 4.650E-07 | 1.271E-07 |
| 837 | Y10B_A | A16B_N | I20B_T | V24B_T | 1.2E-07 | 1.1E-06 | 4.650E-07 | 2.331E-07 |
| 838 | Y10B_A | D6B_A  | I20B_Q | V24B_T | 2.4E-07 | 8.0E-07 | 4.650E-07 | 1.894E-07 |
| 839 | Y10B_A | V7B_A  | I20B_T | V24B_Q | 2.8E-07 | 7.1E-07 | 4.655E-07 | 1.123E-07 |
| 840 | G13B_A | I20B_S | V24B_Q | T2B_A  | 2.9E-07 | 7.1E-07 | 4.655E-07 | 1.212E-07 |
| 841 | Y10B_A | I20B_T | G1B_R  | V24B_N | 2.4E-07 | 7.7E-07 | 4.655E-07 | 1.296E-07 |
| 842 | Y10B_A | V7B_A  | I20B_Q | F19B_Q | 2.0E-07 | 1.2E-06 | 4.660E-07 | 2.078E-07 |
| 843 | Y10B_A | I20B_S | G1B_R  | V24B_N | 2.8E-07 | 8.1E-07 | 4.665E-07 | 1.429E-07 |
| 844 | G13B_A | I20B_N | V24B_T | T2B_A  | 2.7E-07 | 1.0E-06 | 4.665E-07 | 1.834E-07 |
| 845 | G13B_A | Y10B_A | I20B_N | V24B_T | 2.7E-07 | 7.0E-07 | 4.670E-07 | 1.323E-07 |
| 846 | G13B_A | Y10B_A | I20B_Q | F19B_Q | 1.1E-07 | 1.2E-06 | 4.670E-07 | 2.454E-07 |
| 847 | S8B_A  | G13B_W | I20B_T | S9B_A  | 3.2E-07 | 6.3E-07 | 4.670E-07 | 8.597E-08 |
| 848 | Y10B_A | D6B_A  | I20B_N | V24B_N | 1.8E-07 | 8.9E-07 | 4.675E-07 | 1.558E-07 |
| 849 | G13B_A | D6B_A  | I20B_Q | K17B_S | 2.3E-07 | 7.7E-07 | 4.675E-07 | 1.506E-07 |
| 850 | Y10B_A | I20B_N | F19B_A | V24B_T | 2.9E-07 | 9.1E-07 | 4.680E-07 | 1.916E-07 |
| 851 | Y10B_A | I20B_N | L23B_Q | F19B_A | 1.5E-07 | 1.0E-06 | 4.680E-07 | 1.769E-07 |
| 852 | S8B_A  | G13B_W | I20B_Q | S9B_A  | 2.6E-07 | 8.3E-07 | 4.680E-07 | 1.501E-07 |
| 853 | Y10B_A | A16B_N | I20B_S | F19B_Q | 1.5E-07 | 1.0E-06 | 4.680E-07 | 1.857E-07 |
| 854 | Y10B_A | I20B_N | E18B_A | V24B_T | 2.9E-07 | 8.4E-07 | 4.685E-07 | 1.408E-07 |
| 855 | Y10B_A | V7B_A  | I20B_N | L23B_Q | 2.6E-07 | 8.0E-07 | 4.690E-07 | 1.627E-07 |
| 856 | G13B_A | V7B_A  | I20B_Q | K17B_S | 2.5E-07 | 7.1E-07 | 4.695E-07 | 1.667E-07 |
| 857 | Y10B_A | F3B_A  | I20B_N | L23B_R | 2.9E-07 | 8.8E-07 | 4.695E-07 | 1.749E-07 |
| 858 | Y10B_A | I20B_Q | F19B_W | E12B_A | 1.6E-07 | 7.5E-07 | 4.700E-07 | 1.501E-07 |
| 859 | G13B_A | V7B_A  | I20B_Q | S9B_A  | 2.6E-07 | 7.4E-07 | 4.700E-07 | 1.515E-07 |
| 860 | Y10B_A | A16B_N | I20B_N | K17B_S | 9.3E-08 | 9.5E-07 | 4.706E-07 | 2.353E-07 |
| 861 | G13B_A | I20B_S | F19B_Q | Q14B_A | 2.1E-07 | 6.8E-07 | 4.710E-07 | 1.275E-07 |
| 862 | G13B_A | L23B_R | K17B_S | V24B_N | 1.7E-07 | 8.0E-07 | 4.715E-07 | 1.630E-07 |
| 863 | G13B_A | Y10B_A | I20B_N | V24B_N | 1.9E-07 | 7.1E-07 | 4.715E-07 | 1.549E-07 |
| 864 | Y10B_A | I20B_T | F19B_A | V24B_N | 2.2E-07 | 7.5E-07 | 4.715E-07 | 1.211E-07 |
| 865 | G13B_A | L23B_Q | K17B_S | V24B_N | 2.1E-07 | 8.1E-07 | 4.715E-07 | 1.757E-07 |
| 866 | G13B_A | I20B_T | L23B_Q | Q14B_A | 2.3E-07 | 1.2E-06 | 4.715E-07 | 2.451E-07 |
| 867 | Y10B_A | I20B_T | L23B_Q | G1B_A  | 2.8E-07 | 6.5E-07 | 4.715E-07 | 1.129E-07 |
| 868 | G13B_A | D6B_A  | I20B_S | L23B_Q | 1.6E-07 | 7.6E-07 | 4.720E-07 | 1.368E-07 |
| 869 | Y10B_A | F3B_A  | I20B_S | L23B_Q | 2.4E-07 | 6.8E-07 | 4.720E-07 | 1.385E-07 |
| 870 | Y10B_A | I20B_S | V24B_Q | G1B_A  | 2.7E-07 | 7.5E-07 | 4.725E-07 | 1.453E-07 |
| 871 | G13B_A | L11B_A | I20B_Q | S9B_A  | 2.7E-07 | 7.1E-07 | 4.725E-07 | 1.466E-07 |
| 872 | G13B_A | I20B_T | T4B_A  | V24B_T | 2.3E-07 | 6.3E-07 | 4.725E-07 | 9.464E-08 |
| 873 | S8B_A  | V7B_A  | I20B_N | L23B_Q | 3.2E-07 | 9.0E-07 | 4.729E-07 | 1.654E-07 |
| 874 | G13B_A | S8B_A  | I20B_Q | L23B_Q | 2.0E-07 | 8.9E-07 | 4.730E-07 | 1.598E-07 |
| 875 | Y10B_A | F3B_A  | I20B_N | V24B_N | 2.7E-07 | 1.4E-06 | 4.730E-07 | 2.555E-07 |
| 876 | G13B_A | V7B_A  | I20B_N | K17B_S | 2.5E-07 | 8.8E-07 | 4.735E-07 | 1.728E-07 |
| 877 | G13B_A | I20B_S | T2B_A  | V24B_N | 2.2E-07 | 6.4E-07 | 4.735E-07 | 1.242E-07 |
| 878 | Y10B_A | I20B_T | V24B_Q | G1B_A  | 2.2E-07 | 8.0E-07 | 4.740E-07 | 1.710E-07 |
| 879 | G13B_A | I20B_Q | S5B_A  | V24B_Q | 2.2E-07 | 7.5E-07 | 4.740E-07 | 1.719E-07 |
| 880 | Y10B_A | F3B_A  | I20B_T | L23B_Q | 2.3E-07 | 8.9E-07 | 4.740E-07 | 1.848E-07 |
| 881 | G13B_A | L11B_A | I20B_S | K17B_S | 1.9E-07 | 7.8E-07 | 4.745E-07 | 1.462E-07 |
| 882 | Y10B_A | I20B_S | L23B_Q | G1B_A  | 1.9E-07 | 8.9E-07 | 4.745E-07 | 1.814E-07 |
| 883 | G13B_A | S8B_A  | I20B_T | L23B_R | 2.5E-07 | 7.5E-07 | 4.750E-07 | 1.247E-07 |

|     |        |        |        |        |         |         |           |           |
|-----|--------|--------|--------|--------|---------|---------|-----------|-----------|
| 884 | G13B_A | I20B_N | E18B_T | G1B_R  | 2.5E-07 | 7.0E-07 | 4.750E-07 | 1.365E-07 |
| 885 | Y10B_A | A16B_N | I20B_S | V24B_T | 1.1E-07 | 8.3E-07 | 4.750E-07 | 2.183E-07 |
| 886 | G13B_A | I20B_T | S5B_A  | V24B_Q | 2.7E-07 | 7.4E-07 | 4.755E-07 | 1.088E-07 |
| 887 | G13B_A | V7B_A  | I20B_S | K17B_S | 1.5E-07 | 8.3E-07 | 4.755E-07 | 1.894E-07 |
| 888 | G13B_A | I20B_Q | L23B_R | Q14B_A | 2.3E-07 | 1.0E-06 | 4.755E-07 | 2.298E-07 |
| 889 | G13B_A | E18B_T | I20B_Q | G1B_A  | 1.9E-07 | 1.0E-06 | 4.755E-07 | 2.341E-07 |
| 890 | Y10B_A | A16B_N | I20B_Q | V24B_T | 5.7E-08 | 1.3E-06 | 4.762E-07 | 3.233E-07 |
| 891 | G13B_A | S9B_A  | L23B_Q | V24B_Q | 1.8E-07 | 8.8E-07 | 4.765E-07 | 2.182E-07 |
| 892 | G13B_A | I20B_Q | S9B_A  | F19B_A | 2.2E-07 | 8.9E-07 | 4.765E-07 | 1.836E-07 |
| 893 | G13B_A | I20B_Q | K17B_S | G1B_A  | 2.0E-07 | 7.0E-07 | 4.770E-07 | 1.444E-07 |
| 894 | G13B_A | I20B_S | L23B_Q | T2B_A  | 1.1E-07 | 7.6E-07 | 4.770E-07 | 1.708E-07 |
| 895 | G13B_A | Y10B_A | I20B_S | L23B_R | 2.6E-07 | 7.9E-07 | 4.770E-07 | 1.407E-07 |
| 896 | G13B_A | S9B_A  | L23B_Q | V24B_N | 1.6E-07 | 6.8E-07 | 4.770E-07 | 1.327E-07 |
| 897 | G13B_A | I20B_N | V24B_Q | T2B_A  | 2.7E-07 | 7.0E-07 | 4.775E-07 | 1.412E-07 |
| 898 | Y10B_A | I20B_Q | S9B_A  | E12B_A | 2.4E-07 | 7.8E-07 | 4.780E-07 | 1.896E-07 |
| 899 | Y10B_A | D6B_A  | I20B_Q | V24B_N | 2.4E-07 | 9.4E-07 | 4.780E-07 | 1.987E-07 |
| 900 | G13B_A | S8B_A  | I20B_N | L23B_Q | 2.8E-07 | 7.6E-07 | 4.780E-07 | 1.485E-07 |
| 901 | G13B_A | I20B_T | L11B_A | S9B_A  | 2.7E-07 | 7.0E-07 | 4.785E-07 | 1.193E-07 |
| 902 | G13B_A | I20B_N | F19B_Q | Q14B_A | 1.8E-07 | 8.6E-07 | 4.785E-07 | 1.789E-07 |
| 903 | G13B_A | F3B_A  | I20B_S | K17B_S | 2.7E-07 | 7.5E-07 | 4.790E-07 | 1.431E-07 |
| 904 | G13B_A | I20B_N | T4B_A  | V24B_N | 2.4E-07 | 7.4E-07 | 4.790E-07 | 1.358E-07 |
| 905 | S8B_A  | D6B_A  | I20B_N | V24B_T | 2.9E-07 | 8.0E-07 | 4.795E-07 | 1.444E-07 |
| 906 | Y10B_A | F3B_A  | I20B_T | V24B_N | 3.2E-07 | 7.4E-07 | 4.795E-07 | 1.129E-07 |
| 907 | Y10B_A | I20B_T | L11B_A | L23B_R | 2.9E-07 | 6.5E-07 | 4.800E-07 | 1.012E-07 |
| 908 | Y10B_A | L11B_A | I20B_S | L23B_R | 2.5E-07 | 8.3E-07 | 4.805E-07 | 1.458E-07 |
| 909 | Y10B_A | I20B_Q | G1B_R  | F19B_Q | 1.2E-07 | 1.1E-06 | 4.805E-07 | 2.384E-07 |
| 910 | Y10B_A | E18B_T | I20B_T | F19B_W | 2.2E-07 | 1.1E-06 | 4.805E-07 | 2.158E-07 |
| 911 | G13B_A | L23B_R | K17B_S | V24B_T | 2.8E-07 | 1.0E-06 | 4.805E-07 | 1.853E-07 |
| 912 | G13B_A | A16B_N | E18B_T | I20B_S | 2.1E-07 | 7.5E-07 | 4.805E-07 | 1.371E-07 |
| 913 | Y10B_A | V7B_A  | I20B_T | L23B_Q | 2.3E-07 | 8.0E-07 | 4.810E-07 | 1.697E-07 |
| 914 | Y10B_A | F3B_A  | I20B_Q | L23B_Q | 1.6E-07 | 7.5E-07 | 4.810E-07 | 1.532E-07 |
| 915 | G13B_A | A16B_N | I20B_N | F19B_Q | 1.0E-07 | 7.9E-07 | 4.810E-07 | 2.332E-07 |
| 916 | S8B_A  | D6B_A  | I20B_Q | L23B_R | 2.1E-07 | 8.1E-07 | 4.810E-07 | 1.827E-07 |
| 917 | Y10B_A | I20B_T | L23B_R | F19B_A | 2.5E-07 | 1.1E-06 | 4.810E-07 | 1.929E-07 |
| 918 | S8B_A  | G13B_W | I20B_T | E12B_A | 2.8E-07 | 6.8E-07 | 4.815E-07 | 1.303E-07 |
| 919 | G13B_A | I20B_N | E18B_T | F19B_A | 2.7E-07 | 7.7E-07 | 4.815E-07 | 1.489E-07 |
| 920 | G13B_A | I20B_S | T4B_A  | L23B_R | 2.3E-07 | 7.1E-07 | 4.815E-07 | 1.469E-07 |
| 921 | Y10B_A | I20B_S | E18B_A | V24B_N | 2.6E-07 | 7.1E-07 | 4.820E-07 | 1.234E-07 |
| 922 | G13B_A | I20B_T | T4B_A  | L23B_R | 2.0E-07 | 7.9E-07 | 4.820E-07 | 1.519E-07 |
| 923 | Y10B_A | A16B_N | I20B_Q | F19B_Q | 1.5E-07 | 1.1E-06 | 4.820E-07 | 2.769E-07 |
| 924 | G13B_A | S8B_A  | I20B_N | V24B_Q | 2.7E-07 | 7.5E-07 | 4.820E-07 | 1.409E-07 |
| 925 | G13B_A | F3B_A  | E18B_T | I20B_T | 3.1E-07 | 7.5E-07 | 4.825E-07 | 1.249E-07 |
| 926 | Y10B_A | I20B_S | S9B_A  | K17B_S | 2.8E-07 | 9.3E-07 | 4.825E-07 | 1.392E-07 |
| 927 | Y10B_A | G13B_W | I20B_N | S9B_A  | 2.8E-07 | 8.3E-07 | 4.830E-07 | 1.316E-07 |
| 928 | Y10B_A | G13B_W | I20B_N | E12B_A | 2.1E-07 | 1.1E-06 | 4.830E-07 | 1.974E-07 |
| 929 | G13B_A | E18B_T | I20B_T | G1B_R  | 2.5E-07 | 9.6E-07 | 4.835E-07 | 1.795E-07 |
| 930 | G13B_A | I20B_S | S9B_A  | F19B_A | 3.2E-07 | 9.2E-07 | 4.840E-07 | 1.397E-07 |
| 931 | Y10B_A | L11B_A | I20B_Q | V24B_T | 2.8E-07 | 8.7E-07 | 4.840E-07 | 1.772E-07 |
| 932 | G13B_A | I20B_Q | S5B_A  | L23B_Q | 1.9E-07 | 8.9E-07 | 4.840E-07 | 2.163E-07 |
| 933 | Y10B_A | G13B_W | I20B_N | F19B_W | 8.1E-08 | 7.0E-07 | 4.841E-07 | 1.714E-07 |
| 934 | G13B_A | I20B_Q | F19B_Q | Q14B_A | 2.5E-07 | 9.4E-07 | 4.850E-07 | 1.763E-07 |
| 935 | S8B_A  | D6B_A  | I20B_Q | V24B_Q | 2.1E-07 | 7.6E-07 | 4.850E-07 | 1.491E-07 |

|     |        |        |        |        |         |         |           |           |
|-----|--------|--------|--------|--------|---------|---------|-----------|-----------|
| 936 | G13B_A | F19B_Q | K17B_S | V24B_N | 2.3E-07 | 1.1E-06 | 4.855E-07 | 2.038E-07 |
| 937 | G13B_A | I20B_S | T4B_A  | F19B_Q | 2.5E-07 | 7.9E-07 | 4.855E-07 | 1.543E-07 |
| 938 | G13B_A | F19B_W | L23B_Q | V24B_T | 1.4E-07 | 1.0E-06 | 4.855E-07 | 2.458E-07 |
| 939 | Y10B_A | I20B_N | L11B_A | L23B_R | 2.5E-07 | 7.6E-07 | 4.860E-07 | 1.529E-07 |
| 940 | G13B_A | Y10B_A | I20B_N | L23B_Q | 2.9E-07 | 8.9E-07 | 4.865E-07 | 1.837E-07 |
| 941 | G13B_A | I20B_S | G1B_R  | K17B_S | 1.8E-07 | 7.8E-07 | 4.865E-07 | 1.636E-07 |
| 942 | G13B_A | D6B_A  | I20B_S | K17B_S | 1.9E-07 | 1.0E-06 | 4.875E-07 | 1.951E-07 |
| 943 | Y10B_A | F3B_A  | I20B_N | V24B_T | 2.4E-07 | 7.0E-07 | 4.880E-07 | 1.251E-07 |
| 944 | Y10B_A | V7B_A  | I20B_T | V24B_T | 2.2E-07 | 1.0E-06 | 4.880E-07 | 1.596E-07 |
| 945 | G13B_A | D6B_A  | I20B_N | K17B_S | 2.7E-07 | 7.6E-07 | 4.880E-07 | 1.419E-07 |
| 946 | G13B_A | F3B_A  | I20B_Q | E12B_A | 2.3E-07 | 8.9E-07 | 4.885E-07 | 1.748E-07 |
| 947 | Y10B_A | F3B_A  | I20B_T | V24B_Q | 2.7E-07 | 7.1E-07 | 4.885E-07 | 1.241E-07 |
| 948 | G13B_A | I20B_T | S9B_A  | F19B_A | 2.8E-07 | 6.8E-07 | 4.885E-07 | 1.089E-07 |
| 949 | Y10B_A | D6B_A  | I20B_T | V24B_Q | 2.8E-07 | 7.2E-07 | 4.885E-07 | 1.312E-07 |
| 950 | G13B_A | F19B_Q | L23B_Q | K17B_S | 1.9E-07 | 9.9E-07 | 4.885E-07 | 2.283E-07 |
| 951 | G13B_A | I20B_S | E18B_A | K17B_S | 2.3E-07 | 8.5E-07 | 4.885E-07 | 1.635E-07 |
| 952 | Y10B_A | G13B_W | I20B_S | S9B_A  | 2.3E-07 | 8.7E-07 | 4.890E-07 | 1.597E-07 |
| 953 | Y10B_A | L11B_A | I20B_S | V24B_N | 3.2E-07 | 8.3E-07 | 4.890E-07 | 1.381E-07 |
| 954 | Y10B_A | I20B_N | G1B_R  | V24B_T | 3.0E-07 | 7.7E-07 | 4.890E-07 | 1.538E-07 |
| 955 | S8B_A  | D6B_A  | I20B_S | V24B_Q | 1.9E-07 | 9.3E-07 | 4.895E-07 | 1.684E-07 |
| 956 | Y10B_A | A16B_N | I20B_N | V24B_Q | 1.4E-07 | 1.1E-06 | 4.895E-07 | 2.142E-07 |
| 957 | G13B_A | Y10B_A | I20B_T | V24B_T | 2.7E-07 | 7.8E-07 | 4.895E-07 | 1.084E-07 |
| 958 | G13B_A | I20B_N | L11B_A | S9B_A  | 2.1E-07 | 9.7E-07 | 4.900E-07 | 1.793E-07 |
| 959 | G13B_A | I20B_T | F19B_Q | Q14B_A | 2.0E-07 | 7.0E-07 | 4.900E-07 | 1.620E-07 |
| 960 | G13B_A | I20B_S | T4B_A  | V24B_Q | 2.7E-07 | 9.1E-07 | 4.905E-07 | 1.615E-07 |
| 961 | Y10B_A | I20B_S | G1B_R  | L23B_R | 1.3E-07 | 9.7E-07 | 4.910E-07 | 2.121E-07 |
| 962 | Y10B_A | I20B_Q | F19B_W | S9B_A  | 2.2E-07 | 8.7E-07 | 4.910E-07 | 2.252E-07 |
| 963 | Y10B_A | D6B_A  | I20B_S | L23B_Q | 3.0E-07 | 8.1E-07 | 4.910E-07 | 1.583E-07 |
| 964 | G13B_A | I20B_T | E18B_A | K17B_S | 3.3E-07 | 7.6E-07 | 4.915E-07 | 1.293E-07 |
| 965 | Y10B_A | F3B_A  | I20B_S | V24B_Q | 2.3E-07 | 8.3E-07 | 4.915E-07 | 1.766E-07 |
| 966 | G13B_A | Y10B_A | I20B_S | L23B_Q | 2.5E-07 | 1.0E-06 | 4.920E-07 | 1.945E-07 |
| 967 | G13B_A | S8B_A  | I20B_S | V24B_N | 2.9E-07 | 8.7E-07 | 4.920E-07 | 1.486E-07 |
| 968 | Y10B_A | G13B_W | I20B_S | E12B_A | 2.9E-07 | 8.0E-07 | 4.920E-07 | 1.180E-07 |
| 969 | Y10B_A | I20B_N | E18B_A | V24B_Q | 2.9E-07 | 7.2E-07 | 4.920E-07 | 1.282E-07 |
| 970 | G13B_A | I20B_N | G1B_R  | S9B_A  | 3.5E-07 | 7.7E-07 | 4.925E-07 | 1.264E-07 |
| 971 | G13B_A | I20B_N | L11B_A | F19B_W | 2.5E-07 | 8.0E-07 | 4.925E-07 | 1.480E-07 |
| 972 | G13B_A | I20B_N | G1B_R  | K17B_S | 2.7E-07 | 8.6E-07 | 4.925E-07 | 1.463E-07 |
| 973 | Y10B_A | I20B_N | L11B_A | V24B_N | 2.2E-07 | 7.5E-07 | 4.925E-07 | 1.282E-07 |
| 974 | G13B_A | F3B_A  | E18B_T | I20B_Q | 2.4E-07 | 8.7E-07 | 4.930E-07 | 1.980E-07 |
| 975 | G13B_A | F19B_Q | L23B_Q | V24B_T | 1.0E-07 | 9.3E-07 | 4.935E-07 | 2.512E-07 |
| 976 | Y10B_A | I20B_S | F19B_A | V24B_T | 2.7E-07 | 8.8E-07 | 4.940E-07 | 1.655E-07 |
| 977 | G13B_A | I20B_Q | S5B_A  | K17B_S | 2.3E-07 | 8.9E-07 | 4.945E-07 | 1.556E-07 |
| 978 | Y10B_A | D6B_A  | I20B_N | V24B_T | 2.9E-07 | 7.2E-07 | 4.945E-07 | 9.649E-08 |
| 979 | G13B_A | I20B_N | L23B_Q | T2B_A  | 2.4E-07 | 9.3E-07 | 4.945E-07 | 1.692E-07 |
| 980 | Y10B_A | A16B_N | I20B_T | F19B_Q | 1.1E-07 | 1.1E-06 | 4.945E-07 | 2.748E-07 |
| 981 | Y10B_A | I20B_N | G1B_R  | L23B_R | 2.7E-07 | 7.3E-07 | 4.950E-07 | 1.593E-07 |
| 982 | G13B_A | Y10B_A | I20B_N | F19B_Q | 2.4E-07 | 9.7E-07 | 4.950E-07 | 1.995E-07 |
| 983 | G13B_A | I20B_S | G1B_R  | F19B_W | 2.0E-07 | 8.0E-07 | 4.950E-07 | 1.756E-07 |
| 984 | Y10B_A | I20B_N | E18B_T | F19B_W | 1.9E-07 | 1.4E-06 | 4.955E-07 | 2.885E-07 |
| 985 | G13B_A | I20B_S | L23B_R | T2B_A  | 2.4E-07 | 9.4E-07 | 4.955E-07 | 1.750E-07 |
| 986 | Y10B_A | D6B_A  | I20B_T | V24B_N | 2.9E-07 | 7.6E-07 | 4.960E-07 | 1.529E-07 |
| 987 | Y10B_A | A16B_N | I20B_S | V24B_N | 2.0E-07 | 9.7E-07 | 4.960E-07 | 1.929E-07 |

|      |        |        |        |        |         |         |           |           |
|------|--------|--------|--------|--------|---------|---------|-----------|-----------|
| 988  | G13B_A | F3B_A  | I20B_T | K17B_S | 3.4E-07 | 7.9E-07 | 4.960E-07 | 1.358E-07 |
| 989  | Y10B_A | I20B_N | G1B_R  | F19B_Q | 2.1E-07 | 9.5E-07 | 4.960E-07 | 1.914E-07 |
| 990  | Y10B_A | A16B_N | I20B_S | L23B_Q | 1.0E-07 | 9.9E-07 | 4.960E-07 | 2.594E-07 |
| 991  | Y10B_A | I20B_T | V24B_T | G1B_A  | 2.6E-07 | 8.7E-07 | 4.965E-07 | 1.735E-07 |
| 992  | Y10B_A | F3B_A  | I20B_N | V24B_Q | 2.9E-07 | 7.4E-07 | 4.965E-07 | 1.443E-07 |
| 993  | S8B_A  | G13B_W | E18B_T | I20B_T | 2.7E-07 | 9.0E-07 | 4.965E-07 | 1.811E-07 |
| 994  | Y10B_A | I20B_T | E18B_A | V24B_N | 2.5E-07 | 6.5E-07 | 4.965E-07 | 1.051E-07 |
| 995  | Y10B_A | E18B_T | I20B_S | F19B_W | 2.7E-07 | 8.7E-07 | 4.970E-07 | 1.436E-07 |
| 996  | G13B_A | S9B_A  | L23B_R | V24B_Q | 2.4E-07 | 9.1E-07 | 4.970E-07 | 1.395E-07 |
| 997  | Y10B_A | I20B_T | G1B_R  | L23B_Q | 3.0E-07 | 9.6E-07 | 4.980E-07 | 1.671E-07 |
| 998  | G13B_A | Y10B_A | I20B_Q | L23B_Q | 1.1E-07 | 1.1E-06 | 4.980E-07 | 2.297E-07 |
| 999  | Y10B_A | G13B_W | I20B_T | F19B_W | 2.5E-07 | 7.4E-07 | 4.985E-07 | 1.601E-07 |
| 1000 | G13B_A | I20B_T | T4B_A  | V24B_Q | 3.2E-07 | 8.3E-07 | 4.985E-07 | 1.437E-07 |
| 1001 | S8B_A  | G13B_W | I20B_T | F19B_W | 2.1E-07 | 8.0E-07 | 4.990E-07 | 1.566E-07 |
| 1002 | G13B_A | I20B_Q | E18B_A | S9B_A  | 1.9E-07 | 7.6E-07 | 4.995E-07 | 1.546E-07 |
| 1003 | G13B_A | V7B_A  | I20B_N | F19B_W | 1.6E-07 | 8.0E-07 | 5.000E-07 | 2.012E-07 |
| 1004 | Y10B_A | F3B_A  | I20B_T | V24B_T | 3.2E-07 | 9.1E-07 | 5.000E-07 | 1.401E-07 |
| 1005 | S8B_A  | G13B_W | I20B_S | F19B_W | 2.2E-07 | 7.3E-07 | 5.000E-07 | 1.559E-07 |
| 1006 | G13B_A | I20B_S | S5B_A  | V24B_N | 2.9E-07 | 7.8E-07 | 5.000E-07 | 1.540E-07 |
| 1007 | G13B_A | S8B_A  | I20B_N | V24B_T | 2.3E-07 | 8.3E-07 | 5.005E-07 | 1.656E-07 |
| 1008 | G13B_A | S8B_A  | I20B_S | F19B_Q | 3.2E-07 | 7.5E-07 | 5.010E-07 | 1.161E-07 |
| 1009 | G13B_A | A16B_N | I20B_T | S9B_A  | 2.3E-07 | 7.9E-07 | 5.015E-07 | 1.441E-07 |
| 1010 | Y10B_A | I20B_S | L23B_R | F19B_A | 2.9E-07 | 9.2E-07 | 5.015E-07 | 1.408E-07 |
| 1011 | Y10B_A | I20B_N | E18B_A | V24B_N | 2.2E-07 | 1.0E-06 | 5.015E-07 | 2.036E-07 |
| 1012 | G13B_A | I20B_T | T4B_A  | L23B_Q | 3.2E-07 | 8.0E-07 | 5.020E-07 | 1.328E-07 |
| 1013 | G13B_A | F3B_A  | I20B_Q | S9B_A  | 2.3E-07 | 8.3E-07 | 5.020E-07 | 1.604E-07 |
| 1014 | G13B_A | I20B_S | V24B_T | T2B_A  | 2.3E-07 | 9.1E-07 | 5.025E-07 | 1.491E-07 |
| 1015 | Y10B_A | I20B_T | L11B_A | V24B_Q | 1.8E-07 | 8.8E-07 | 5.025E-07 | 1.885E-07 |
| 1016 | G13B_A | S9B_A  | L23B_R | V24B_N | 2.2E-07 | 8.8E-07 | 5.025E-07 | 1.607E-07 |
| 1017 | G13B_A | A16B_N | I20B_N | K17B_S | 5.4E-08 | 1.0E-06 | 5.027E-07 | 2.725E-07 |
| 1018 | G13B_A | L11B_A | I20B_Q | F19B_W | 1.2E-07 | 1.3E-06 | 5.030E-07 | 2.615E-07 |
| 1019 | G13B_A | A16B_N | I20B_Q | E12B_A | 1.0E-07 | 9.0E-07 | 5.035E-07 | 2.219E-07 |
| 1020 | G13B_A | I20B_N | S9B_A  | F19B_A | 2.6E-07 | 7.1E-07 | 5.040E-07 | 1.519E-07 |
| 1021 | G13B_A | F3B_A  | I20B_N | S9B_A  | 3.2E-07 | 8.7E-07 | 5.040E-07 | 1.399E-07 |
| 1022 | G13B_A | Y10B_A | I20B_S | V24B_Q | 3.2E-07 | 7.8E-07 | 5.040E-07 | 1.157E-07 |
| 1023 | G13B_A | S9B_A  | L23B_Q | V24B_T | 3.1E-07 | 7.2E-07 | 5.045E-07 | 1.213E-07 |
| 1024 | Y10B_A | D6B_A  | I20B_Q | L23B_Q | 2.5E-07 | 1.1E-06 | 5.045E-07 | 2.286E-07 |
| 1025 | G13B_A | F19B_Q | L23B_R | V24B_T | 3.3E-07 | 8.5E-07 | 5.045E-07 | 1.407E-07 |
| 1026 | Y10B_A | I20B_S | L23B_R | G1B_A  | 2.9E-07 | 7.4E-07 | 5.045E-07 | 1.322E-07 |
| 1027 | G13B_A | I20B_T | S5B_A  | V24B_T | 2.7E-07 | 7.1E-07 | 5.045E-07 | 1.271E-07 |
| 1028 | Y10B_A | V7B_A  | I20B_N | L23B_R | 2.9E-07 | 1.2E-06 | 5.050E-07 | 2.258E-07 |
| 1029 | G13B_A | I20B_N | E18B_A | F19B_Q | 2.1E-07 | 1.0E-06 | 5.055E-07 | 1.909E-07 |
| 1030 | G13B_A | I20B_N | T4B_A  | L23B_Q | 2.0E-07 | 1.1E-06 | 5.055E-07 | 2.000E-07 |
| 1031 | G13B_A | I20B_S | Q14B_A | V24B_N | 1.9E-07 | 8.7E-07 | 5.060E-07 | 1.458E-07 |
| 1032 | G13B_A | I20B_N | G1B_R  | F19B_W | 2.1E-07 | 1.0E-06 | 5.060E-07 | 2.084E-07 |
| 1033 | S8B_A  | D6B_A  | I20B_T | V24B_Q | 2.4E-07 | 9.3E-07 | 5.060E-07 | 1.738E-07 |
| 1034 | Y10B_A | A16B_N | I20B_S | L23B_R | 2.0E-07 | 9.8E-07 | 5.070E-07 | 2.158E-07 |
| 1035 | G13B_A | I20B_T | K17B_A | V24B_Q | 3.1E-07 | 6.8E-07 | 5.075E-07 | 1.140E-07 |
| 1036 | G13B_A | Y10B_A | I20B_S | V24B_T | 2.3E-07 | 1.1E-06 | 5.075E-07 | 2.109E-07 |
| 1037 | G13B_A | E18B_T | L23B_Q | V24B_Q | 2.0E-07 | 8.8E-07 | 5.075E-07 | 2.130E-07 |
| 1038 | S8B_A  | V7B_A  | I20B_N | L23B_R | 2.6E-07 | 9.3E-07 | 5.076E-07 | 1.778E-07 |
| 1039 | G13B_A | I20B_S | S5B_A  | L23B_Q | 3.4E-07 | 8.9E-07 | 5.085E-07 | 1.304E-07 |

|      |        |        |        |        |         |         |           |           |
|------|--------|--------|--------|--------|---------|---------|-----------|-----------|
| 1040 | G13B_A | E18B_T | I20B_S | G1B_A  | 3.3E-07 | 9.2E-07 | 5.090E-07 | 1.471E-07 |
| 1041 | Y10B_A | D6B_A  | I20B_S | V24B_T | 3.4E-07 | 8.3E-07 | 5.090E-07 | 1.419E-07 |
| 1042 | G13B_A | D6B_A  | I20B_T | F19B_Q | 2.1E-07 | 1.0E-06 | 5.090E-07 | 2.278E-07 |
| 1043 | G13B_A | V7B_A  | I20B_S | F19B_W | 3.0E-07 | 9.6E-07 | 5.090E-07 | 1.578E-07 |
| 1044 | Y10B_A | I20B_T | F19B_W | S9B_A  | 2.5E-07 | 9.1E-07 | 5.090E-07 | 1.755E-07 |
| 1045 | G13B_A | L23B_R | V24B_T | E12B_A | 2.8E-07 | 8.0E-07 | 5.095E-07 | 1.514E-07 |
| 1046 | Y10B_A | V7B_A  | I20B_S | L23B_Q | 3.2E-07 | 7.6E-07 | 5.095E-07 | 1.162E-07 |
| 1047 | G13B_A | D6B_A  | I20B_T | K17B_S | 2.8E-07 | 8.8E-07 | 5.095E-07 | 1.483E-07 |
| 1048 | Y10B_A | V7B_A  | I20B_N | V24B_T | 2.4E-07 | 8.3E-07 | 5.100E-07 | 1.355E-07 |
| 1049 | G13B_A | S8B_A  | I20B_S | L23B_Q | 2.2E-07 | 8.0E-07 | 5.105E-07 | 1.780E-07 |
| 1050 | G13B_A | I20B_N | L23B_R | Q14B_A | 2.1E-07 | 1.0E-06 | 5.105E-07 | 2.007E-07 |
| 1051 | G13B_A | V7B_A  | I20B_T | S9B_A  | 2.2E-07 | 8.3E-07 | 5.105E-07 | 1.395E-07 |
| 1052 | Y10B_A | A16B_N | I20B_Q | L23B_R | 8.7E-08 | 9.9E-07 | 5.109E-07 | 2.605E-07 |
| 1053 | G13B_A | I20B_Q | L23B_R | T2B_A  | 1.5E-07 | 1.3E-06 | 5.110E-07 | 2.771E-07 |
| 1054 | S8B_A  | D6B_A  | I20B_N | V24B_Q | 3.2E-07 | 9.4E-07 | 5.110E-07 | 1.621E-07 |
| 1055 | Y10B_A | I20B_N | L23B_R | F19B_A | 1.9E-07 | 7.9E-07 | 5.115E-07 | 1.742E-07 |
| 1056 | G13B_A | I20B_S | T4B_A  | V24B_T | 3.2E-07 | 7.1E-07 | 5.115E-07 | 1.059E-07 |
| 1057 | S8B_A  | D6B_A  | I20B_N | L23B_R | 1.5E-07 | 1.1E-06 | 5.115E-07 | 2.426E-07 |
| 1058 | G13B_A | I20B_N | F19B_Q | T2B_A  | 2.2E-07 | 1.0E-06 | 5.115E-07 | 1.831E-07 |
| 1059 | G13B_A | D6B_A  | I20B_Q | S9B_A  | 2.8E-07 | 7.6E-07 | 5.120E-07 | 1.250E-07 |
| 1060 | S8B_A  | G13B_W | I20B_S | S9B_A  | 2.8E-07 | 8.2E-07 | 5.125E-07 | 1.339E-07 |
| 1061 | G13B_A | I20B_T | F19B_W | G1B_A  | 2.5E-07 | 9.2E-07 | 5.125E-07 | 2.031E-07 |
| 1062 | Y10B_A | L23B_R | K17B_S | V24B_Q | 2.2E-07 | 8.8E-07 | 5.130E-07 | 1.767E-07 |
| 1063 | G13B_A | I20B_N | S5B_A  | F19B_Q | 2.2E-07 | 1.0E-06 | 5.140E-07 | 1.967E-07 |
| 1064 | G13B_A | I20B_Q | L23B_Q | T2B_A  | 2.0E-07 | 1.0E-06 | 5.140E-07 | 2.531E-07 |
| 1065 | Y10B_A | S8B_A  | I20B_Q | V24B_T | 1.9E-07 | 8.8E-07 | 5.145E-07 | 1.926E-07 |
| 1066 | Y10B_A | I20B_S | G1B_R  | V24B_T | 3.0E-07 | 1.0E-06 | 5.145E-07 | 1.858E-07 |
| 1067 | Y10B_A | I20B_N | E18B_A | L23B_Q | 2.3E-07 | 8.6E-07 | 5.150E-07 | 1.703E-07 |
| 1068 | Y10B_A | F19B_Q | L23B_Q | V24B_N | 2.4E-07 | 8.8E-07 | 5.155E-07 | 1.863E-07 |
| 1069 | G13B_A | I20B_N | L23B_Q | Q14B_A | 2.8E-07 | 8.9E-07 | 5.155E-07 | 1.778E-07 |
| 1070 | G13B_A | I20B_Q | S5B_A  | F19B_Q | 1.9E-07 | 1.4E-06 | 5.155E-07 | 2.973E-07 |
| 1071 | G13B_A | V7B_A  | I20B_N | E18B_T | 2.7E-07 | 8.8E-07 | 5.160E-07 | 1.811E-07 |
| 1072 | Y10B_A | I20B_T | L11B_A | L23B_Q | 2.3E-07 | 8.9E-07 | 5.160E-07 | 1.708E-07 |
| 1073 | Y10B_A | I20B_N | F19B_W | S9B_A  | 2.0E-07 | 8.3E-07 | 5.160E-07 | 1.463E-07 |
| 1074 | Y10B_A | I20B_Q | V24B_Q | T2B_A  | 2.5E-07 | 9.3E-07 | 5.165E-07 | 1.778E-07 |
| 1075 | G13B_A | I20B_S | E18B_A | F19B_Q | 3.0E-07 | 8.4E-07 | 5.165E-07 | 1.828E-07 |
| 1076 | G13B_A | I20B_S | V24B_T | Q14B_A | 2.7E-07 | 8.7E-07 | 5.170E-07 | 1.708E-07 |
| 1077 | G13B_A | I20B_Q | G1B_R  | E12B_A | 2.0E-07 | 8.8E-07 | 5.175E-07 | 1.883E-07 |
| 1078 | G13B_A | I20B_T | S5B_A  | L23B_R | 2.4E-07 | 7.5E-07 | 5.175E-07 | 1.354E-07 |
| 1079 | Y10B_A | F3B_A  | I20B_S | V24B_T | 2.6E-07 | 8.8E-07 | 5.180E-07 | 1.562E-07 |
| 1080 | G13B_A | I20B_Q | L23B_Q | Q14B_A | 2.9E-07 | 1.0E-06 | 5.180E-07 | 2.116E-07 |
| 1081 | G13B_A | S8B_A  | I20B_N | F19B_Q | 1.5E-07 | 7.9E-07 | 5.180E-07 | 1.465E-07 |
| 1082 | G13B_A | E18B_T | I20B_S | G1B_R  | 2.6E-07 | 1.0E-06 | 5.180E-07 | 1.957E-07 |
| 1083 | Y10B_A | I20B_T | L11B_A | V24B_T | 2.7E-07 | 1.0E-06 | 5.180E-07 | 1.888E-07 |
| 1084 | Y10B_A | D6B_A  | I20B_Q | L23B_R | 2.1E-07 | 1.3E-06 | 5.190E-07 | 2.583E-07 |
| 1085 | G13B_A | I20B_S | K17B_S | G1B_A  | 2.9E-07 | 7.9E-07 | 5.195E-07 | 1.258E-07 |
| 1086 | S8B_A  | D6B_A  | I20B_S | V24B_N | 2.4E-07 | 8.4E-07 | 5.200E-07 | 1.551E-07 |
| 1087 | G13B_A | E18B_T | I20B_T | L11B_A | 2.4E-07 | 1.0E-06 | 5.200E-07 | 1.823E-07 |
| 1088 | G13B_A | F19B_Q | K17B_S | V24B_T | 1.8E-07 | 8.7E-07 | 5.200E-07 | 2.019E-07 |
| 1089 | Y10B_A | L11B_A | I20B_S | F19B_Q | 1.8E-07 | 7.9E-07 | 5.200E-07 | 1.769E-07 |
| 1090 | G13B_A | A16B_N | E18B_T | I20B_T | 1.6E-07 | 1.1E-06 | 5.200E-07 | 2.357E-07 |
| 1091 | G13B_A | S8B_A  | I20B_Q | V24B_T | 2.8E-07 | 8.3E-07 | 5.200E-07 | 1.709E-07 |

|      |        |        |        |        |         |         |           |           |
|------|--------|--------|--------|--------|---------|---------|-----------|-----------|
| 1092 | Y10B_A | V7B_A  | I20B_Q | K17B_S | 2.9E-07 | 8.0E-07 | 5.205E-07 | 1.647E-07 |
| 1093 | G13B_A | I20B_S | S9B_A  | G1B_A  | 3.2E-07 | 7.4E-07 | 5.205E-07 | 1.168E-07 |
| 1094 | Y10B_A | I20B_T | L11B_A | F19B_Q | 1.5E-07 | 8.7E-07 | 5.205E-07 | 1.617E-07 |
| 1095 | S8B_A  | D6B_A  | I20B_S | V24B_T | 2.9E-07 | 9.8E-07 | 5.205E-07 | 1.672E-07 |
| 1096 | G13B_A | I20B_Q | K17B_A | V24B_N | 2.4E-07 | 9.3E-07 | 5.210E-07 | 1.874E-07 |
| 1097 | Y10B_A | E18B_T | I20B_S | E12B_A | 2.5E-07 | 7.4E-07 | 5.210E-07 | 1.623E-07 |
| 1098 | G13B_A | S8B_A  | I20B_S | V24B_T | 3.2E-07 | 1.0E-06 | 5.210E-07 | 1.485E-07 |
| 1099 | G13B_A | E18B_T | K17B_S | V24B_Q | 2.1E-07 | 1.2E-06 | 5.210E-07 | 2.206E-07 |
| 1100 | S8B_A  | D6B_A  | I20B_Q | V24B_T | 1.6E-07 | 1.2E-06 | 5.210E-07 | 2.424E-07 |
| 1101 | Y10B_A | L11B_A | I20B_Q | F19B_Q | 1.5E-07 | 1.0E-06 | 5.215E-07 | 2.001E-07 |
| 1102 | G13B_A | I20B_T | T4B_A  | F19B_Q | 2.2E-07 | 1.2E-06 | 5.215E-07 | 2.403E-07 |
| 1103 | Y10B_A | I20B_Q | E18B_A | L23B_R | 1.5E-07 | 1.2E-06 | 5.220E-07 | 2.250E-07 |
| 1104 | Y10B_A | V7B_A  | I20B_N | F19B_Q | 1.8E-07 | 8.7E-07 | 5.220E-07 | 1.974E-07 |
| 1105 | G13B_A | I20B_S | G1B_R  | S9B_A  | 3.0E-07 | 8.1E-07 | 5.225E-07 | 1.534E-07 |
| 1106 | G13B_A | Y10B_A | I20B_T | L23B_Q | 1.8E-07 | 8.8E-07 | 5.225E-07 | 1.715E-07 |
| 1107 | G13B_A | E18B_T | I20B_T | F19B_A | 3.1E-07 | 8.8E-07 | 5.225E-07 | 1.618E-07 |
| 1108 | G13B_A | I20B_S | F19B_Q | T2B_A  | 2.2E-07 | 1.2E-06 | 5.230E-07 | 2.402E-07 |
| 1109 | G13B_A | I20B_Q | F19B_W | G1B_A  | 2.2E-07 | 1.0E-06 | 5.230E-07 | 1.981E-07 |
| 1110 | G13B_A | I20B_T | G1B_R  | F19B_W | 3.2E-07 | 7.5E-07 | 5.230E-07 | 1.150E-07 |
| 1111 | G13B_A | I20B_Q | S9B_A  | G1B_A  | 3.3E-07 | 8.7E-07 | 5.230E-07 | 1.514E-07 |
| 1112 | G13B_A | I20B_Q | K17B_A | V24B_Q | 2.4E-07 | 9.8E-07 | 5.235E-07 | 1.972E-07 |
| 1113 | G13B_A | I20B_T | F19B_A | E12B_A | 3.3E-07 | 1.1E-06 | 5.235E-07 | 1.958E-07 |
| 1114 | G13B_A | A16B_N | I20B_N | F19B_W | 1.5E-07 | 1.5E-06 | 5.235E-07 | 3.280E-07 |
| 1115 | G13B_A | A16B_N | I20B_N | S9B_A  | 1.5E-07 | 8.8E-07 | 5.240E-07 | 2.246E-07 |
| 1116 | Y10B_A | D6B_A  | I20B_Q | V24B_Q | 2.6E-07 | 8.9E-07 | 5.240E-07 | 1.662E-07 |
| 1117 | G13B_A | I20B_S | L23B_Q | Q14B_A | 2.8E-07 | 8.0E-07 | 5.245E-07 | 1.501E-07 |
| 1118 | Y10B_A | V7B_A  | I20B_S | L23B_R | 2.7E-07 | 7.9E-07 | 5.245E-07 | 1.590E-07 |
| 1119 | Y10B_A | F3B_A  | E18B_T | I20B_Q | 2.9E-07 | 1.1E-06 | 5.250E-07 | 1.879E-07 |
| 1120 | G13B_A | F3B_A  | I20B_N | E18B_T | 2.7E-07 | 8.7E-07 | 5.250E-07 | 1.420E-07 |
| 1121 | G13B_A | V7B_A  | I20B_Q | F19B_W | 3.0E-07 | 1.0E-06 | 5.250E-07 | 2.001E-07 |
| 1122 | G13B_A | S8B_A  | I20B_T | L23B_Q | 3.4E-07 | 1.2E-06 | 5.255E-07 | 2.131E-07 |
| 1123 | Y10B_A | V7B_A  | I20B_S | V24B_N | 2.5E-07 | 9.1E-07 | 5.255E-07 | 1.925E-07 |
| 1124 | Y10B_A | I20B_Q | T4B_A  | V24B_N | 1.7E-07 | 9.3E-07 | 5.255E-07 | 1.989E-07 |
| 1125 | Y10B_A | I20B_Q | E18B_A | L23B_Q | 3.0E-07 | 9.5E-07 | 5.260E-07 | 2.222E-07 |
| 1126 | Y10B_A | I20B_Q | V24B_T | T2B_A  | 2.9E-07 | 8.4E-07 | 5.265E-07 | 1.695E-07 |
| 1127 | Y10B_A | I20B_T | K17B_S | F19B_A | 2.8E-07 | 7.6E-07 | 5.270E-07 | 1.553E-07 |
| 1128 | Y10B_A | I20B_N | F19B_W | E12B_A | 3.3E-07 | 7.6E-07 | 5.275E-07 | 1.139E-07 |
| 1129 | G13B_A | E18B_T | L23B_Q | V24B_T | 2.5E-07 | 8.5E-07 | 5.275E-07 | 1.929E-07 |
| 1130 | Y10B_A | I20B_S | F19B_W | S9B_A  | 2.2E-07 | 1.0E-06 | 5.275E-07 | 2.042E-07 |
| 1131 | G13B_A | I20B_T | L11B_A | K17B_S | 2.9E-07 | 8.3E-07 | 5.275E-07 | 1.570E-07 |
| 1132 | S8B_A  | G13B_W | I20B_N | E12B_A | 2.4E-07 | 9.3E-07 | 5.285E-07 | 1.744E-07 |
| 1133 | Y10B_A | I20B_T | G1B_R  | L23B_R | 2.7E-07 | 8.3E-07 | 5.290E-07 | 1.722E-07 |
| 1134 | G13B_A | D6B_A  | I20B_Q | F19B_Q | 1.7E-07 | 9.7E-07 | 5.295E-07 | 2.290E-07 |
| 1135 | S8B_A  | D6B_A  | I20B_T | V24B_T | 3.4E-07 | 1.3E-06 | 5.295E-07 | 2.192E-07 |
| 1136 | Y10B_A | A16B_N | I20B_T | V24B_N | 1.5E-07 | 1.5E-06 | 5.295E-07 | 2.996E-07 |
| 1137 | G13B_A | I20B_Q | F19B_A | E12B_A | 1.8E-07 | 9.4E-07 | 5.300E-07 | 2.559E-07 |
| 1138 | Y10B_A | I20B_N | S9B_A  | E12B_A | 3.5E-07 | 8.2E-07 | 5.300E-07 | 1.351E-07 |
| 1139 | Y10B_A | A16B_N | E18B_T | I20B_Q | 1.9E-07 | 1.2E-06 | 5.305E-07 | 2.675E-07 |
| 1140 | G13B_A | I20B_N | T4B_A  | L23B_R | 2.9E-07 | 7.8E-07 | 5.310E-07 | 1.541E-07 |
| 1141 | Y10B_A | I20B_S | L23B_Q | F19B_A | 1.3E-07 | 1.2E-06 | 5.315E-07 | 2.614E-07 |
| 1142 | G13B_A | S8B_A  | I20B_Q | K17B_S | 2.7E-07 | 8.9E-07 | 5.315E-07 | 1.813E-07 |
| 1143 | Y10B_A | I20B_S | S5B_A  | V24B_Q | 1.8E-07 | 8.0E-07 | 5.315E-07 | 1.377E-07 |

|      |        |        |        |        |         |         |           |           |
|------|--------|--------|--------|--------|---------|---------|-----------|-----------|
| 1144 | G13B_A | D6B_A  | I20B_S | S9B_A  | 3.3E-07 | 8.9E-07 | 5.315E-07 | 1.688E-07 |
| 1145 | G13B_A | I20B_N | S5B_A  | L23B_Q | 2.8E-07 | 1.0E-06 | 5.315E-07 | 2.096E-07 |
| 1146 | G13B_A | L23B_R | E12B_A | V24B_N | 2.1E-07 | 7.3E-07 | 5.320E-07 | 1.511E-07 |
| 1147 | G13B_A | F19B_Q | S9B_A  | L23B_Q | 2.5E-07 | 9.9E-07 | 5.325E-07 | 2.117E-07 |
| 1148 | Y10B_A | I20B_N | S5B_A  | V24B_N | 2.9E-07 | 7.9E-07 | 5.330E-07 | 1.529E-07 |
| 1149 | Y10B_A | F19B_Q | K17B_S | V24B_Q | 1.6E-07 | 1.0E-06 | 5.330E-07 | 1.956E-07 |
| 1150 | Y10B_A | I20B_S | K17B_S | E12B_A | 2.3E-07 | 9.1E-07 | 5.330E-07 | 2.007E-07 |
| 1151 | G13B_A | F3B_A  | I20B_S | E12B_A | 2.9E-07 | 9.9E-07 | 5.335E-07 | 1.953E-07 |
| 1152 | Y10B_A | I20B_Q | T4B_A  | L23B_R | 2.1E-07 | 1.0E-06 | 5.335E-07 | 2.174E-07 |
| 1153 | G13B_A | I20B_Q | E18B_A | E12B_A | 2.5E-07 | 9.6E-07 | 5.335E-07 | 1.837E-07 |
| 1154 | G13B_A | I20B_N | S9B_A  | G1B_A  | 2.3E-07 | 8.4E-07 | 5.340E-07 | 1.780E-07 |
| 1155 | G13B_A | D6B_A  | E18B_T | I20B_T | 3.0E-07 | 1.1E-06 | 5.345E-07 | 1.832E-07 |
| 1156 | Y10B_A | I20B_T | S5B_A  | V24B_N | 3.4E-07 | 7.9E-07 | 5.350E-07 | 1.495E-07 |
| 1157 | S8B_A  | D6B_A  | I20B_S | L23B_Q | 2.1E-07 | 1.0E-06 | 5.355E-07 | 2.084E-07 |
| 1158 | Y10B_A | I20B_Q | Q14B_A | V24B_N | 2.6E-07 | 8.4E-07 | 5.355E-07 | 1.934E-07 |
| 1159 | S8B_A  | D6B_A  | I20B_Q | L23B_Q | 2.2E-07 | 1.1E-06 | 5.360E-07 | 2.047E-07 |
| 1160 | G13B_A | F3B_A  | I20B_N | F19B_W | 2.0E-07 | 1.0E-06 | 5.360E-07 | 2.077E-07 |
| 1161 | S8B_A  | V7B_A  | I20B_N | F19B_Q | 3.5E-07 | 8.6E-07 | 5.361E-07 | 1.484E-07 |
| 1162 | Y10B_A | D6B_A  | I20B_N | F19B_Q | 2.8E-07 | 1.3E-06 | 5.365E-07 | 2.505E-07 |
| 1163 | G13B_A | A16B_N | I20B_S | F19B_W | 1.4E-07 | 9.1E-07 | 5.365E-07 | 2.192E-07 |
| 1164 | G13B_A | I20B_S | F19B_W | G1B_A  | 2.2E-07 | 1.4E-06 | 5.370E-07 | 2.619E-07 |
| 1165 | G13B_A | V7B_A  | E18B_T | I20B_T | 3.2E-07 | 8.7E-07 | 5.370E-07 | 1.826E-07 |
| 1166 | G13B_A | K17B_S | E12B_A | V24B_N | 2.3E-07 | 8.6E-07 | 5.375E-07 | 2.019E-07 |
| 1167 | G13B_A | I20B_T | K17B_S | F19B_A | 3.0E-07 | 8.9E-07 | 5.380E-07 | 1.376E-07 |
| 1168 | G13B_A | I20B_S | S5B_A  | L23B_R | 1.7E-07 | 1.3E-06 | 5.380E-07 | 2.723E-07 |
| 1169 | Y10B_A | I20B_T | Q14B_A | V24B_N | 2.6E-07 | 6.8E-07 | 5.380E-07 | 1.116E-07 |
| 1170 | G13B_A | E18B_T | I20B_Q | G1B_R  | 2.4E-07 | 1.1E-06 | 5.380E-07 | 2.129E-07 |
| 1171 | Y10B_A | I20B_N | L11B_A | L23B_Q | 2.4E-07 | 9.4E-07 | 5.380E-07 | 2.052E-07 |
| 1172 | Y10B_A | I20B_N | V24B_T | G1B_A  | 2.0E-07 | 1.0E-06 | 5.385E-07 | 1.935E-07 |
| 1173 | Y10B_A | I20B_S | V24B_T | G1B_A  | 3.2E-07 | 9.7E-07 | 5.390E-07 | 1.753E-07 |
| 1174 | G13B_A | I20B_T | K17B_A | V24B_N | 2.9E-07 | 8.6E-07 | 5.400E-07 | 1.632E-07 |
| 1175 | G13B_A | I20B_T | S9B_A  | G1B_A  | 3.7E-07 | 7.4E-07 | 5.400E-07 | 1.191E-07 |
| 1176 | G13B_A | I20B_Q | E18B_A | K17B_S | 1.6E-07 | 9.0E-07 | 5.400E-07 | 2.259E-07 |
| 1177 | G13B_A | A16B_N | E18B_T | I20B_Q | 8.3E-08 | 1.1E-06 | 5.401E-07 | 2.681E-07 |
| 1178 | Y10B_A | I20B_S | G1B_R  | F19B_Q | 2.4E-07 | 8.5E-07 | 5.405E-07 | 1.629E-07 |
| 1179 | G13B_A | V7B_A  | I20B_Q | E12B_A | 3.3E-07 | 7.6E-07 | 5.405E-07 | 1.467E-07 |
| 1180 | Y10B_A | D6B_A  | I20B_T | V24B_T | 3.0E-07 | 9.4E-07 | 5.410E-07 | 1.727E-07 |
| 1181 | G13B_A | I20B_S | K17B_S | F19B_A | 2.6E-07 | 1.3E-06 | 5.415E-07 | 2.216E-07 |
| 1182 | G13B_A | I20B_T | E12B_A | G1B_A  | 3.3E-07 | 7.6E-07 | 5.420E-07 | 1.275E-07 |
| 1183 | Y10B_A | F3B_A  | I20B_T | F19B_Q | 3.3E-07 | 8.3E-07 | 5.425E-07 | 1.331E-07 |
| 1184 | Y10B_A | S8B_A  | I20B_Q | V24B_Q | 2.1E-07 | 9.3E-07 | 5.425E-07 | 1.906E-07 |
| 1185 | Y10B_A | D6B_A  | I20B_T | L23B_R | 2.1E-07 | 8.1E-07 | 5.425E-07 | 1.775E-07 |
| 1186 | G13B_A | L23B_R | V24B_Q | E12B_A | 2.8E-07 | 1.0E-06 | 5.425E-07 | 1.882E-07 |
| 1187 | G13B_A | S8B_A  | E18B_T | I20B_Q | 2.9E-07 | 1.2E-06 | 5.425E-07 | 2.279E-07 |
| 1188 | Y10B_A | D6B_A  | I20B_S | V24B_Q | 3.5E-07 | 1.2E-06 | 5.430E-07 | 1.950E-07 |
| 1189 | G13B_A | S8B_A  | I20B_S | L23B_R | 2.7E-07 | 1.2E-06 | 5.430E-07 | 2.296E-07 |
| 1190 | G13B_A | I20B_T | G1B_R  | S9B_A  | 2.4E-07 | 9.6E-07 | 5.430E-07 | 1.632E-07 |
| 1191 | G13B_A | A16B_N | I20B_S | S9B_A  | 9.6E-08 | 1.1E-06 | 5.433E-07 | 2.777E-07 |
| 1192 | G13B_A | I20B_N | E18B_T | G1B_A  | 3.2E-07 | 9.2E-07 | 5.440E-07 | 1.454E-07 |
| 1193 | Y10B_A | A16B_N | I20B_T | L23B_R | 2.1E-07 | 8.4E-07 | 5.440E-07 | 1.903E-07 |
| 1194 | Y10B_A | I20B_S | S9B_A  | E12B_A | 3.5E-07 | 7.3E-07 | 5.445E-07 | 1.182E-07 |
| 1195 | G13B_A | I20B_N | F19B_W | G1B_A  | 2.7E-07 | 9.5E-07 | 5.445E-07 | 1.968E-07 |



|      |        |        |        |        |         |         |           |           |
|------|--------|--------|--------|--------|---------|---------|-----------|-----------|
| 1196 | G13B_A | F19B_Q | E12B_A | V24B_N | 3.0E-07 | 9.6E-07 | 5.450E-07 | 1.749E-07 |
| 1197 | Y10B_A | I20B_T | F19B_W | E12B_A | 2.5E-07 | 9.4E-07 | 5.450E-07 | 1.998E-07 |
| 1198 | Y10B_A | I20B_Q | L23B_Q | Q14B_A | 2.5E-07 | 1.1E-06 | 5.455E-07 | 1.927E-07 |
| 1199 | Y10B_A | A16B_N | I20B_N | V24B_T | 3.2E-07 | 8.3E-07 | 5.455E-07 | 1.436E-07 |
| 1200 | Y10B_A | I20B_T | T4B_A  | V24B_Q | 2.8E-07 | 9.7E-07 | 5.455E-07 | 1.613E-07 |
| 1201 | Y10B_A | I20B_Q | F19B_Q | G1B_A  | 1.5E-07 | 1.3E-06 | 5.460E-07 | 2.731E-07 |
| 1202 | Y10B_A | A16B_N | E18B_T | I20B_S | 1.1E-07 | 8.8E-07 | 5.460E-07 | 2.470E-07 |
| 1203 | G13B_A | V7B_A  | E18B_T | I20B_Q | 2.6E-07 | 1.2E-06 | 5.460E-07 | 2.434E-07 |
| 1204 | Y10B_A | I20B_S | V24B_Q | Q14B_A | 2.9E-07 | 1.0E-06 | 5.465E-07 | 2.115E-07 |
| 1205 | G13B_A | I20B_T | V24B_T | Q14B_A | 3.2E-07 | 7.4E-07 | 5.465E-07 | 1.376E-07 |
| 1206 | G13B_A | F19B_Q | S9B_A  | V24B_T | 1.9E-07 | 9.6E-07 | 5.465E-07 | 2.223E-07 |
| 1207 | G13B_A | V7B_A  | I20B_N | S9B_A  | 3.7E-07 | 9.7E-07 | 5.470E-07 | 1.486E-07 |
| 1208 | G13B_A | F3B_A  | I20B_T | S9B_A  | 3.0E-07 | 7.8E-07 | 5.475E-07 | 1.403E-07 |
| 1209 | G13B_A | I20B_S | S5B_A  | V24B_T | 3.0E-07 | 1.1E-06 | 5.480E-07 | 2.162E-07 |
| 1210 | Y10B_A | I20B_S | E18B_A | L23B_R | 2.6E-07 | 9.4E-07 | 5.485E-07 | 1.817E-07 |
| 1211 | G13B_A | L11B_A | I20B_S | F19B_W | 3.0E-07 | 9.9E-07 | 5.485E-07 | 1.624E-07 |
| 1212 | G13B_A | E18B_T | I20B_T | G1B_A  | 3.1E-07 | 1.1E-06 | 5.485E-07 | 1.910E-07 |
| 1213 | Y10B_A | A16B_N | I20B_Q | K17B_S | 1.4E-07 | 9.5E-07 | 5.485E-07 | 2.114E-07 |
| 1214 | G13B_A | D6B_A  | E18B_T | I20B_S | 3.4E-07 | 8.4E-07 | 5.485E-07 | 1.272E-07 |
| 1215 | Y10B_A | I20B_Q | K17B_S | F19B_A | 2.7E-07 | 9.5E-07 | 5.490E-07 | 2.170E-07 |
| 1216 | G13B_A | I20B_S | K17B_A | V24B_N | 3.4E-07 | 8.3E-07 | 5.490E-07 | 1.389E-07 |
| 1217 | Y10B_A | I20B_S | G1B_R  | L23B_Q | 3.0E-07 | 8.7E-07 | 5.495E-07 | 1.608E-07 |
| 1218 | Y10B_A | I20B_Q | T2B_A  | V24B_N | 3.1E-07 | 8.3E-07 | 5.495E-07 | 1.687E-07 |
| 1219 | G13B_A | A16B_N | I20B_T | K17B_S | 2.2E-07 | 8.8E-07 | 5.500E-07 | 1.874E-07 |
| 1220 | S8B_A  | V7B_A  | I20B_N | K17B_S | 2.8E-07 | 8.9E-07 | 5.500E-07 | 1.973E-07 |
| 1221 | Y10B_A | E18B_T | L23B_Q | V24B_N | 2.4E-07 | 1.1E-06 | 5.500E-07 | 2.430E-07 |
| 1222 | Y10B_A | I20B_Q | V24B_T | Q14B_A | 2.5E-07 | 9.3E-07 | 5.505E-07 | 2.132E-07 |
| 1223 | G13B_A | S8B_A  | I20B_T | F19B_Q | 2.6E-07 | 1.0E-06 | 5.505E-07 | 2.035E-07 |
| 1224 | Y10B_A | I20B_T | S9B_A  | E12B_A | 3.0E-07 | 9.6E-07 | 5.520E-07 | 1.475E-07 |
| 1225 | G13B_A | F19B_W | L23B_R | V24B_N | 3.0E-07 | 9.7E-07 | 5.525E-07 | 1.395E-07 |
| 1226 | G13B_A | L23B_Q | V24B_T | E12B_A | 2.7E-07 | 9.4E-07 | 5.530E-07 | 2.031E-07 |
| 1227 | Y10B_A | F19B_Q | L23B_Q | V24B_Q | 1.8E-07 | 9.3E-07 | 5.535E-07 | 2.113E-07 |
| 1228 | Y10B_A | D6B_A  | I20B_N | L23B_Q | 2.1E-07 | 8.5E-07 | 5.535E-07 | 1.900E-07 |
| 1229 | G13B_A | I20B_N | K17B_A | V24B_N | 3.6E-07 | 1.0E-06 | 5.535E-07 | 1.410E-07 |
| 1230 | G13B_A | I20B_Q | S5B_A  | S9B_A  | 2.9E-07 | 1.1E-06 | 5.540E-07 | 2.161E-07 |
| 1231 | Y10B_A | I20B_N | Q14B_A | V24B_N | 3.4E-07 | 1.1E-06 | 5.540E-07 | 1.852E-07 |
| 1232 | G13B_A | E18B_T | L11B_A | I20B_S | 2.3E-07 | 9.2E-07 | 5.545E-07 | 2.099E-07 |
| 1233 | Y10B_A | A16B_N | I20B_Q | S9B_A  | 1.7E-07 | 1.2E-06 | 5.550E-07 | 2.919E-07 |
| 1234 | G13B_A | I20B_N | T4B_A  | F19B_Q | 2.6E-07 | 1.2E-06 | 5.560E-07 | 2.505E-07 |
| 1235 | Y10B_A | A16B_N | I20B_T | L23B_Q | 1.4E-07 | 9.0E-07 | 5.560E-07 | 1.898E-07 |
| 1236 | S8B_A  | G13B_W | I20B_N | F19B_W | 1.9E-07 | 8.0E-07 | 5.560E-07 | 1.529E-07 |
| 1237 | Y10B_A | E18B_T | I20B_T | E12B_A | 2.5E-07 | 9.6E-07 | 5.570E-07 | 1.912E-07 |
| 1238 | G13B_A | I20B_T | S5B_A  | L23B_Q | 3.6E-07 | 9.3E-07 | 5.570E-07 | 1.687E-07 |
| 1239 | Y10B_A | S8B_A  | I20B_T | V24B_N | 3.0E-07 | 9.3E-07 | 5.570E-07 | 1.832E-07 |
| 1240 | G13B_A | I20B_N | E18B_T | L11B_A | 2.7E-07 | 1.3E-06 | 5.575E-07 | 2.620E-07 |
| 1241 | G13B_A | I20B_N | E18B_A | F19B_W | 2.7E-07 | 8.7E-07 | 5.580E-07 | 1.637E-07 |
| 1242 | G13B_A | D6B_A  | I20B_Q | E12B_A | 2.4E-07 | 1.1E-06 | 5.585E-07 | 2.355E-07 |
| 1243 | G13B_A | I20B_S | K17B_A | V24B_Q | 2.6E-07 | 1.0E-06 | 5.585E-07 | 1.721E-07 |
| 1244 | Y10B_A | I20B_T | V24B_T | Q14B_A | 3.6E-07 | 8.3E-07 | 5.585E-07 | 1.369E-07 |
| 1245 | G13B_A | I20B_Q | F19B_Q | T2B_A  | 1.1E-07 | 1.0E-06 | 5.585E-07 | 2.835E-07 |
| 1246 | Y10B_A | I20B_T | G1B_R  | K17B_S | 3.6E-07 | 8.3E-07 | 5.590E-07 | 1.503E-07 |
| 1247 | Y10B_A | I20B_N | T4B_A  | L23B_R | 2.5E-07 | 1.0E-06 | 5.595E-07 | 1.963E-07 |

|      |        |        |        |        |         |         |           |           |
|------|--------|--------|--------|--------|---------|---------|-----------|-----------|
| 1248 | Y10B_A | I20B_N | T2B_A  | V24B_N | 1.7E-07 | 1.1E-06 | 5.595E-07 | 2.434E-07 |
| 1249 | S8B_A  | D6B_A  | I20B_T | L23B_R | 3.2E-07 | 9.4E-07 | 5.595E-07 | 1.476E-07 |
| 1250 | Y10B_A | E18B_T | I20B_Q | F19B_A | 2.4E-07 | 9.4E-07 | 5.605E-07 | 1.823E-07 |
| 1251 | Y10B_A | S8B_A  | I20B_N | V24B_Q | 3.4E-07 | 9.8E-07 | 5.610E-07 | 1.569E-07 |
| 1252 | Y10B_A | I20B_N | G1B_R  | L23B_Q | 3.2E-07 | 9.7E-07 | 5.615E-07 | 1.545E-07 |
| 1253 | Y10B_A | I20B_Q | E18B_A | V24B_T | 2.5E-07 | 7.6E-07 | 5.615E-07 | 1.491E-07 |
| 1254 | Y10B_A | I20B_Q | T4B_A  | V24B_T | 2.5E-07 | 9.8E-07 | 5.620E-07 | 2.122E-07 |
| 1255 | Y10B_A | I20B_N | V24B_Q | T2B_A  | 3.4E-07 | 1.1E-06 | 5.620E-07 | 1.825E-07 |
| 1256 | Y10B_A | I20B_T | F19B_Q | G1B_A  | 1.8E-07 | 1.3E-06 | 5.620E-07 | 3.103E-07 |
| 1257 | G13B_A | I20B_Q | G1B_R  | F19B_A | 3.0E-07 | 1.0E-06 | 5.625E-07 | 2.117E-07 |
| 1258 | G13B_A | Y10B_A | I20B_Q | S9B_A  | 2.2E-07 | 1.1E-06 | 5.625E-07 | 2.374E-07 |
| 1259 | Y10B_A | L23B_Q | K17B_S | V24B_T | 3.5E-07 | 9.7E-07 | 5.625E-07 | 1.612E-07 |
| 1260 | G13B_A | L23B_Q | V24B_Q | E12B_A | 2.2E-07 | 1.0E-06 | 5.630E-07 | 1.782E-07 |
| 1261 | G13B_A | V7B_A  | I20B_T | F19B_W | 2.3E-07 | 8.3E-07 | 5.630E-07 | 1.674E-07 |
| 1262 | G13B_A | Y10B_A | I20B_S | F19B_Q | 2.3E-07 | 1.5E-06 | 5.630E-07 | 2.853E-07 |
| 1263 | Y10B_A | L11B_A | I20B_Q | K17B_S | 2.9E-07 | 9.3E-07 | 5.635E-07 | 1.754E-07 |
| 1264 | Y10B_A | G13B_W | I20B_Q | E12B_A | 3.4E-07 | 8.4E-07 | 5.635E-07 | 1.320E-07 |
| 1265 | Y10B_A | G13B_W | L23B_Q | V24B_N | 2.7E-07 | 8.8E-07 | 5.640E-07 | 1.792E-07 |
| 1266 | Y10B_A | D6B_A  | I20B_T | L23B_Q | 2.5E-07 | 9.5E-07 | 5.640E-07 | 1.896E-07 |
| 1267 | Y10B_A | I20B_T | T2B_A  | V24B_N | 3.6E-07 | 7.9E-07 | 5.640E-07 | 1.233E-07 |
| 1268 | Y10B_A | I20B_N | T4B_A  | V24B_N | 2.9E-07 | 9.7E-07 | 5.640E-07 | 1.961E-07 |
| 1269 | Y10B_A | F3B_A  | I20B_S | F19B_Q | 1.5E-07 | 1.0E-06 | 5.645E-07 | 2.306E-07 |
| 1270 | Y10B_A | G13B_W | V7B_A  | I20B_Q | 2.8E-07 | 9.5E-07 | 5.650E-07 | 1.853E-07 |
| 1271 | S8B_A  | G13B_W | A16B_N | I20B_Q | 1.7E-07 | 1.1E-06 | 5.650E-07 | 2.927E-07 |
| 1272 | Y10B_A | I20B_N | L23B_Q | T2B_A  | 3.1E-07 | 8.5E-07 | 5.655E-07 | 1.444E-07 |
| 1273 | G13B_A | F3B_A  | I20B_S | S9B_A  | 3.2E-07 | 1.1E-06 | 5.655E-07 | 1.806E-07 |
| 1274 | G13B_A | A16B_N | I20B_Q | F19B_W | 7.6E-08 | 1.0E-06 | 5.658E-07 | 2.887E-07 |
| 1275 | S8B_A  | D6B_A  | I20B_N | L23B_Q | 3.0E-07 | 9.5E-07 | 5.665E-07 | 1.976E-07 |
| 1276 | G13B_A | V7B_A  | I20B_N | E12B_A | 3.2E-07 | 1.0E-06 | 5.665E-07 | 2.039E-07 |
| 1277 | Y10B_A | I20B_S | E18B_A | V24B_Q | 2.2E-07 | 9.4E-07 | 5.665E-07 | 1.758E-07 |
| 1278 | G13B_A | I20B_N | E18B_A | S9B_A  | 3.4E-07 | 1.2E-06 | 5.665E-07 | 2.307E-07 |
| 1279 | Y10B_A | I20B_N | L23B_Q | G1B_A  | 3.2E-07 | 9.3E-07 | 5.670E-07 | 2.033E-07 |
| 1280 | G13B_A | F3B_A  | I20B_N | E12B_A | 2.9E-07 | 8.9E-07 | 5.670E-07 | 1.579E-07 |
| 1281 | Y10B_A | I20B_Q | S5B_A  | V24B_N | 2.0E-07 | 9.3E-07 | 5.670E-07 | 2.212E-07 |
| 1282 | Y10B_A | I20B_T | E18B_A | L23B_Q | 2.5E-07 | 9.9E-07 | 5.675E-07 | 2.029E-07 |
| 1283 | Y10B_A | D6B_A  | I20B_Q | K17B_S | 3.5E-07 | 9.5E-07 | 5.675E-07 | 1.637E-07 |
| 1284 | Y10B_A | I20B_S | V24B_Q | T2B_A  | 3.6E-07 | 1.1E-06 | 5.675E-07 | 1.920E-07 |
| 1285 | G13B_A | S9B_A  | K17B_S | V24B_Q | 2.9E-07 | 9.4E-07 | 5.675E-07 | 2.114E-07 |
| 1286 | G13B_A | S9B_A  | L23B_R | K17B_S | 3.0E-07 | 1.0E-06 | 5.680E-07 | 2.099E-07 |
| 1287 | Y10B_A | G13B_W | L23B_Q | V24B_T | 3.9E-07 | 7.8E-07 | 5.685E-07 | 1.291E-07 |
| 1288 | G13B_A | I20B_N | F19B_A | E12B_A | 2.9E-07 | 9.4E-07 | 5.685E-07 | 1.918E-07 |
| 1289 | G13B_A | I20B_S | G1B_R  | E12B_A | 3.2E-07 | 9.2E-07 | 5.690E-07 | 1.724E-07 |
| 1290 | Y10B_A | L23B_R | K17B_S | V24B_N | 2.2E-07 | 1.0E-06 | 5.695E-07 | 2.089E-07 |
| 1291 | Y10B_A | A16B_N | I20B_N | F19B_Q | 1.1E-07 | 1.1E-06 | 5.695E-07 | 2.814E-07 |
| 1292 | G13B_A | F3B_A  | I20B_Q | F19B_W | 3.1E-07 | 1.4E-06 | 5.700E-07 | 2.480E-07 |
| 1293 | G13B_A | I20B_S | T4B_A  | L23B_Q | 3.4E-07 | 8.0E-07 | 5.700E-07 | 1.603E-07 |
| 1294 | Y10B_A | I20B_N | E18B_T | G1B_R  | 2.7E-07 | 9.4E-07 | 5.705E-07 | 1.766E-07 |
| 1295 | S8B_A  | G13B_W | I20B_Q | F19B_A | 2.9E-07 | 1.2E-06 | 5.705E-07 | 2.349E-07 |
| 1296 | G13B_A | I20B_T | K17B_A | L23B_Q | 1.9E-07 | 8.5E-07 | 5.705E-07 | 1.838E-07 |
| 1297 | Y10B_A | L11B_A | I20B_S | L23B_Q | 2.8E-07 | 8.9E-07 | 5.705E-07 | 1.780E-07 |
| 1298 | Y10B_A | V7B_A  | E18B_T | I20B_Q | 2.5E-07 | 1.1E-06 | 5.710E-07 | 2.457E-07 |
| 1299 | G13B_A | I20B_Q | K17B_A | L23B_R | 3.1E-07 | 1.1E-06 | 5.710E-07 | 2.264E-07 |

|      |        |        |        |        |         |         |           |           |
|------|--------|--------|--------|--------|---------|---------|-----------|-----------|
| 1300 | Y10B_A | I20B_Q | L23B_R | T2B_A  | 1.9E-07 | 1.4E-06 | 5.715E-07 | 2.889E-07 |
| 1301 | G13B_A | I20B_T | G1B_R  | E12B_A | 3.2E-07 | 8.8E-07 | 5.715E-07 | 1.520E-07 |
| 1302 | Y10B_A | F3B_A  | I20B_Q | F19B_Q | 3.0E-07 | 1.2E-06 | 5.720E-07 | 2.021E-07 |
| 1303 | Y10B_A | I20B_N | G1B_R  | K17B_S | 3.0E-07 | 1.0E-06 | 5.720E-07 | 2.046E-07 |
| 1304 | S8B_A  | G13B_W | L11B_A | I20B_Q | 2.3E-07 | 1.1E-06 | 5.725E-07 | 2.292E-07 |
| 1305 | Y10B_A | F3B_A  | I20B_N | L23B_Q | 2.4E-07 | 1.2E-06 | 5.730E-07 | 2.583E-07 |
| 1306 | Y10B_A | D6B_A  | I20B_T | K17B_S | 3.3E-07 | 8.6E-07 | 5.730E-07 | 1.492E-07 |
| 1307 | G13B_A | V7B_A  | I20B_S | S9B_A  | 3.2E-07 | 9.7E-07 | 5.730E-07 | 1.710E-07 |
| 1308 | G13B_A | V7B_A  | A16B_N | I20B_N | 2.0E-07 | 1.1E-06 | 5.730E-07 | 2.917E-07 |
| 1309 | G13B_A | E18B_T | K17B_S | V24B_N | 3.0E-07 | 1.2E-06 | 5.730E-07 | 2.538E-07 |
| 1310 | Y10B_A | I20B_Q | S5B_A  | V24B_Q | 2.9E-07 | 8.9E-07 | 5.735E-07 | 1.786E-07 |
| 1311 | Y10B_A | S8B_A  | I20B_Q | L23B_R | 2.6E-07 | 1.6E-06 | 5.740E-07 | 2.970E-07 |
| 1312 | G13B_A | F19B_Q | S9B_A  | V24B_Q | 3.4E-07 | 8.3E-07 | 5.745E-07 | 1.516E-07 |
| 1313 | G13B_A | E18B_T | F19B_Q | V24B_N | 1.9E-07 | 1.2E-06 | 5.745E-07 | 2.534E-07 |
| 1314 | G13B_A | E18B_T | F19B_Q | V24B_Q | 2.1E-07 | 1.1E-06 | 5.750E-07 | 2.116E-07 |
| 1315 | Y10B_A | I20B_N | L23B_R | Q14B_A | 3.8E-07 | 1.0E-06 | 5.750E-07 | 1.750E-07 |
| 1316 | Y10B_A | I20B_Q | S5B_A  | L23B_R | 3.8E-07 | 9.9E-07 | 5.755E-07 | 2.052E-07 |
| 1317 | Y10B_A | I20B_T | L11B_A | K17B_S | 2.7E-07 | 8.9E-07 | 5.755E-07 | 1.686E-07 |
| 1318 | G13B_A | I20B_N | K17B_A | V24B_Q | 3.6E-07 | 1.3E-06 | 5.760E-07 | 2.098E-07 |
| 1319 | Y10B_A | F19B_Q | S9B_A  | V24B_T | 3.6E-07 | 9.6E-07 | 5.760E-07 | 1.567E-07 |
| 1320 | Y10B_A | I20B_N | T4B_A  | V24B_Q | 3.4E-07 | 9.3E-07 | 5.760E-07 | 1.623E-07 |
| 1321 | Y10B_A | G13B_W | L23B_Q | V24B_Q | 2.3E-07 | 8.9E-07 | 5.765E-07 | 1.815E-07 |
| 1322 | G13B_A | I20B_T | L11B_A | F19B_W | 3.7E-07 | 1.0E-06 | 5.765E-07 | 1.601E-07 |
| 1323 | G13B_A | Y10B_A | I20B_Q | K17B_S | 2.7E-07 | 9.3E-07 | 5.765E-07 | 2.231E-07 |
| 1324 | Y10B_A | I20B_T | G1B_R  | F19B_Q | 3.0E-07 | 1.1E-06 | 5.770E-07 | 2.178E-07 |
| 1325 | G13B_A | E18B_T | S9B_A  | V24B_Q | 3.7E-07 | 1.2E-06 | 5.770E-07 | 2.057E-07 |
| 1326 | S8B_A  | G13B_W | I20B_S | E12B_A | 2.4E-07 | 9.3E-07 | 5.770E-07 | 1.806E-07 |
| 1327 | G13B_A | I20B_S | E18B_A | S9B_A  | 2.9E-07 | 1.2E-06 | 5.775E-07 | 2.350E-07 |
| 1328 | S8B_A  | G13B_W | I20B_N | G1B_R  | 2.5E-07 | 8.5E-07 | 5.775E-07 | 1.567E-07 |
| 1329 | G13B_A | I20B_T | L11B_A | E12B_A | 2.0E-07 | 8.9E-07 | 5.775E-07 | 1.784E-07 |
| 1330 | G13B_A | D6B_A  | E18B_T | I20B_Q | 2.4E-07 | 1.1E-06 | 5.780E-07 | 2.561E-07 |
| 1331 | Y10B_A | I20B_S | T4B_A  | V24B_Q | 3.4E-07 | 9.3E-07 | 5.780E-07 | 1.851E-07 |
| 1332 | G13B_A | D6B_A  | I20B_Q | F19B_W | 2.2E-07 | 1.1E-06 | 5.785E-07 | 2.480E-07 |
| 1333 | S8B_A  | D6B_A  | I20B_S | L23B_R | 3.6E-07 | 1.0E-06 | 5.785E-07 | 1.555E-07 |
| 1334 | Y10B_A | I20B_S | K17B_S | F19B_A | 2.8E-07 | 1.3E-06 | 5.785E-07 | 2.289E-07 |
| 1335 | G13B_A | L23B_Q | E12B_A | V24B_N | 3.1E-07 | 1.2E-06 | 5.790E-07 | 2.664E-07 |
| 1336 | Y10B_A | I20B_S | G1B_R  | S9B_A  | 3.3E-07 | 7.7E-07 | 5.800E-07 | 1.470E-07 |
| 1337 | G13B_A | E18B_T | I20B_S | F19B_A | 2.7E-07 | 1.0E-06 | 5.800E-07 | 2.134E-07 |
| 1338 | Y10B_A | I20B_N | F19B_Q | G1B_A  | 3.2E-07 | 1.1E-06 | 5.800E-07 | 1.696E-07 |
| 1339 | G13B_A | I20B_T | E18B_A | F19B_W | 3.9E-07 | 8.7E-07 | 5.805E-07 | 1.407E-07 |
| 1340 | Y10B_A | I20B_T | V24B_Q | Q14B_A | 4.0E-07 | 9.3E-07 | 5.805E-07 | 1.460E-07 |
| 1341 | Y10B_A | V7B_A  | I20B_N | E18B_T | 2.2E-07 | 1.3E-06 | 5.805E-07 | 2.677E-07 |
| 1342 | Y10B_A | L11B_A | I20B_Q | F19B_W | 2.8E-07 | 1.1E-06 | 5.810E-07 | 2.115E-07 |
| 1343 | Y10B_A | I20B_T | E18B_A | V24B_T | 3.2E-07 | 9.7E-07 | 5.810E-07 | 1.679E-07 |
| 1344 | G13B_A | F19B_Q | V24B_Q | E12B_A | 2.2E-07 | 1.7E-06 | 5.815E-07 | 3.101E-07 |
| 1345 | G13B_A | I20B_N | E18B_A | K17B_S | 2.4E-07 | 9.9E-07 | 5.815E-07 | 1.986E-07 |
| 1346 | Y10B_A | I20B_Q | G1B_R  | K17B_S | 2.9E-07 | 1.1E-06 | 5.830E-07 | 1.971E-07 |
| 1347 | Y10B_A | D6B_A  | I20B_Q | F19B_W | 3.0E-07 | 9.8E-07 | 5.835E-07 | 1.821E-07 |
| 1348 | Y10B_A | I20B_N | E18B_A | F19B_Q | 2.5E-07 | 1.5E-06 | 5.835E-07 | 2.714E-07 |
| 1349 | G13B_A | F19B_W | K17B_S | V24B_Q | 2.3E-07 | 1.1E-06 | 5.835E-07 | 2.095E-07 |
| 1350 | S8B_A  | D6B_A  | I20B_S | F19B_Q | 2.4E-07 | 1.9E-06 | 5.845E-07 | 3.645E-07 |
| 1351 | G13B_A | I20B_N | G1B_R  | E12B_A | 3.2E-07 | 1.2E-06 | 5.850E-07 | 2.037E-07 |

|      |        |        |        |        |         |         |           |           |
|------|--------|--------|--------|--------|---------|---------|-----------|-----------|
| 1352 | G13B_A | F3B_A  | E18B_T | I20B_S | 2.7E-07 | 1.2E-06 | 5.860E-07 | 2.286E-07 |
| 1353 | G13B_A | Y10B_A | I20B_N | K17B_S | 1.9E-07 | 8.9E-07 | 5.865E-07 | 1.917E-07 |
| 1354 | Y10B_A | V7B_A  | I20B_S | F19B_Q | 2.3E-07 | 1.0E-06 | 5.865E-07 | 1.877E-07 |
| 1355 | Y10B_A | G13B_W | L23B_R | V24B_N | 3.3E-07 | 1.0E-06 | 5.870E-07 | 1.501E-07 |
| 1356 | G13B_A | F19B_Q | S9B_A  | V24B_N | 2.9E-07 | 1.1E-06 | 5.870E-07 | 2.237E-07 |
| 1357 | G13B_A | I20B_T | E18B_A | S9B_A  | 2.9E-07 | 1.0E-06 | 5.875E-07 | 1.654E-07 |
| 1358 | G13B_A | I20B_T | K17B_A | L23B_R | 3.2E-07 | 8.8E-07 | 5.875E-07 | 1.858E-07 |
| 1359 | Y10B_A | I20B_T | G1B_R  | E12B_A | 3.6E-07 | 9.3E-07 | 5.880E-07 | 1.384E-07 |
| 1360 | G13B_A | V7B_A  | I20B_T | E12B_A | 2.4E-07 | 7.6E-07 | 5.880E-07 | 1.399E-07 |
| 1361 | Y10B_A | I20B_Q | F19B_W | G1B_A  | 2.0E-07 | 1.1E-06 | 5.885E-07 | 2.185E-07 |
| 1362 | G13B_A | I20B_N | E12B_A | G1B_A  | 3.4E-07 | 9.4E-07 | 5.885E-07 | 1.669E-07 |
| 1363 | G13B_A | D6B_A  | I20B_S | F19B_W | 2.7E-07 | 1.1E-06 | 5.890E-07 | 2.220E-07 |
| 1364 | Y10B_A | I20B_Q | S9B_A  | F19B_A | 2.8E-07 | 1.1E-06 | 5.895E-07 | 1.997E-07 |
| 1365 | G13B_A | F19B_W | K17B_S | V24B_N | 2.2E-07 | 1.0E-06 | 5.905E-07 | 2.202E-07 |
| 1366 | S8B_A  | G13B_W | A16B_N | I20B_S | 2.8E-07 | 1.2E-06 | 5.905E-07 | 2.253E-07 |
| 1367 | Y10B_A | L11B_A | I20B_S | K17B_S | 3.3E-07 | 9.8E-07 | 5.905E-07 | 1.970E-07 |
| 1368 | G13B_A | I20B_N | K17B_A | V24B_T | 3.5E-07 | 9.3E-07 | 5.905E-07 | 1.637E-07 |
| 1369 | G13B_A | E18B_T | F19B_Q | L23B_Q | 1.8E-07 | 1.7E-06 | 5.905E-07 | 3.526E-07 |
| 1370 | G13B_A | E18B_T | I20B_S | T2B_A  | 4.2E-07 | 8.3E-07 | 5.910E-07 | 1.217E-07 |
| 1371 | G13B_A | Y10B_A | I20B_Q | F19B_W | 2.3E-07 | 1.5E-06 | 5.915E-07 | 2.882E-07 |
| 1372 | Y10B_A | I20B_N | S5B_A  | L23B_Q | 3.6E-07 | 1.0E-06 | 5.920E-07 | 1.772E-07 |
| 1373 | G13B_A | I20B_S | S5B_A  | F19B_Q | 2.1E-07 | 1.0E-06 | 5.920E-07 | 2.312E-07 |
| 1374 | S8B_A  | D6B_A  | I20B_N | F19B_Q | 2.8E-07 | 1.1E-06 | 5.925E-07 | 2.591E-07 |
| 1375 | Y10B_A | G13B_W | I20B_N | F19B_A | 3.0E-07 | 8.8E-07 | 5.925E-07 | 1.904E-07 |
| 1376 | G13B_A | L11B_A | I20B_S | S9B_A  | 3.5E-07 | 8.3E-07 | 5.925E-07 | 1.279E-07 |
| 1377 | Y10B_A | I20B_T | S5B_A  | L23B_R | 2.4E-07 | 8.5E-07 | 5.925E-07 | 1.648E-07 |
| 1378 | Y10B_A | E18B_T | I20B_T | L11B_A | 3.6E-07 | 9.8E-07 | 5.925E-07 | 1.548E-07 |
| 1379 | Y10B_A | F3B_A  | I20B_N | K17B_S | 2.8E-07 | 1.0E-06 | 5.930E-07 | 2.008E-07 |
| 1380 | Y10B_A | I20B_N | V24B_Q | Q14B_A | 3.7E-07 | 1.0E-06 | 5.930E-07 | 1.976E-07 |
| 1381 | Y10B_A | A16B_N | I20B_T | S9B_A  | 1.7E-07 | 1.2E-06 | 5.930E-07 | 2.768E-07 |
| 1382 | S8B_A  | G13B_W | I20B_T | F19B_A | 2.9E-07 | 9.5E-07 | 5.930E-07 | 1.743E-07 |
| 1383 | G13B_A | I20B_Q | K17B_S | T2B_A  | 2.3E-07 | 1.2E-06 | 5.935E-07 | 2.699E-07 |
| 1384 | G13B_A | S9B_A  | K17B_S | V24B_N | 3.4E-07 | 1.0E-06 | 5.940E-07 | 1.755E-07 |
| 1385 | G13B_A | D6B_A  | I20B_T | S9B_A  | 1.7E-07 | 8.9E-07 | 5.940E-07 | 1.728E-07 |
| 1386 | G13B_A | V7B_A  | E18B_T | I20B_S | 2.7E-07 | 1.3E-06 | 5.945E-07 | 2.904E-07 |
| 1387 | G13B_A | L11B_A | I20B_Q | E12B_A | 2.4E-07 | 1.0E-06 | 5.945E-07 | 1.820E-07 |
| 1388 | Y10B_A | I20B_N | V24B_T | T2B_A  | 3.0E-07 | 8.7E-07 | 5.950E-07 | 1.479E-07 |
| 1389 | G13B_A | F3B_A  | I20B_Q | G1B_R  | 2.6E-07 | 1.0E-06 | 5.965E-07 | 2.214E-07 |
| 1390 | Y10B_A | S9B_A  | L23B_Q | V24B_T | 2.8E-07 | 8.5E-07 | 5.965E-07 | 1.660E-07 |
| 1391 | Y10B_A | S9B_A  | L23B_R | V24B_N | 2.9E-07 | 1.0E-06 | 5.965E-07 | 1.927E-07 |
| 1392 | Y10B_A | I20B_S | S5B_A  | V24B_N | 2.1E-07 | 1.4E-06 | 5.975E-07 | 2.452E-07 |
| 1393 | G13B_A | I20B_N | K17B_A | L23B_Q | 3.7E-07 | 8.4E-07 | 5.975E-07 | 1.397E-07 |
| 1394 | G13B_A | I20B_S | K17B_A | L23B_R | 3.5E-07 | 9.3E-07 | 5.975E-07 | 1.913E-07 |
| 1395 | G13B_A | E18B_T | I20B_T | T2B_A  | 4.2E-07 | 9.8E-07 | 5.980E-07 | 1.554E-07 |
| 1396 | Y10B_A | E18B_T | L11B_A | I20B_Q | 3.4E-07 | 9.8E-07 | 5.985E-07 | 1.887E-07 |
| 1397 | G13B_A | V7B_A  | I20B_Q | G1B_R  | 3.8E-07 | 8.8E-07 | 5.990E-07 | 1.695E-07 |
| 1398 | Y10B_A | S8B_A  | I20B_N | L23B_R | 2.7E-07 | 1.2E-06 | 5.990E-07 | 2.368E-07 |
| 1399 | G13B_A | Y10B_A | I20B_T | F19B_Q | 2.3E-07 | 1.1E-06 | 6.005E-07 | 2.583E-07 |
| 1400 | G13B_A | I20B_T | E18B_A | E12B_A | 3.7E-07 | 8.1E-07 | 6.010E-07 | 1.262E-07 |
| 1401 | Y10B_A | S8B_A  | I20B_Q | F19B_Q | 2.1E-07 | 1.2E-06 | 6.010E-07 | 2.888E-07 |
| 1402 | G13B_A | I20B_N | E18B_T | Q14B_A | 3.5E-07 | 8.3E-07 | 6.010E-07 | 1.379E-07 |
| 1403 | G13B_A | E18B_T | F19B_Q | V24B_T | 3.4E-07 | 1.4E-06 | 6.015E-07 | 2.589E-07 |

|      |        |        |        |        |         |         |           |           |
|------|--------|--------|--------|--------|---------|---------|-----------|-----------|
| 1404 | Y10B_A | I20B_S | L23B_R | T2B_A  | 2.3E-07 | 8.8E-07 | 6.020E-07 | 1.651E-07 |
| 1405 | G13B_A | S9B_A  | K17B_S | V24B_T | 3.9E-07 | 8.0E-07 | 6.020E-07 | 1.084E-07 |
| 1406 | Y10B_A | I20B_S | Q14B_A | V24B_N | 2.9E-07 | 9.3E-07 | 6.020E-07 | 1.602E-07 |
| 1407 | S8B_A  | G13B_W | L23B_Q | V24B_Q | 2.7E-07 | 1.2E-06 | 6.025E-07 | 2.505E-07 |
| 1408 | G13B_A | I20B_Q | F19B_W | Q14B_A | 3.3E-07 | 1.3E-06 | 6.030E-07 | 2.578E-07 |
| 1409 | Y10B_A | I20B_T | V24B_Q | T2B_A  | 3.6E-07 | 9.3E-07 | 6.030E-07 | 1.628E-07 |
| 1410 | G13B_A | I20B_Q | K17B_A | V24B_T | 2.6E-07 | 1.2E-06 | 6.030E-07 | 2.433E-07 |
| 1411 | Y10B_A | V7B_A  | I20B_T | K17B_S | 3.8E-07 | 8.9E-07 | 6.035E-07 | 1.746E-07 |
| 1412 | Y10B_A | A16B_N | I20B_T | E12B_A | 1.4E-07 | 1.1E-06 | 6.040E-07 | 2.476E-07 |
| 1413 | G13B_A | E18B_T | S9B_A  | L23B_Q | 2.1E-07 | 1.4E-06 | 6.045E-07 | 2.722E-07 |
| 1414 | Y10B_A | S8B_A  | I20B_Q | V24B_N | 3.4E-07 | 9.3E-07 | 6.045E-07 | 1.822E-07 |
| 1415 | G13B_A | S8B_A  | I20B_T | K17B_S | 3.3E-07 | 1.0E-06 | 6.050E-07 | 2.001E-07 |
| 1416 | Y10B_A | I20B_S | T4B_A  | L23B_R | 3.6E-07 | 1.2E-06 | 6.050E-07 | 2.195E-07 |
| 1417 | Y10B_A | I20B_S | S9B_A  | F19B_A | 3.4E-07 | 9.4E-07 | 6.055E-07 | 1.877E-07 |
| 1418 | G13B_A | S8B_A  | I20B_Q | S9B_A  | 2.4E-07 | 9.8E-07 | 6.055E-07 | 2.034E-07 |
| 1419 | Y10B_A | S8B_A  | I20B_S | V24B_N | 3.6E-07 | 9.3E-07 | 6.060E-07 | 1.558E-07 |
| 1420 | G13B_A | I20B_T | K17B_A | V24B_T | 3.6E-07 | 9.3E-07 | 6.070E-07 | 1.602E-07 |
| 1421 | Y10B_A | I20B_S | G1B_R  | K17B_S | 2.8E-07 | 1.1E-06 | 6.075E-07 | 2.319E-07 |
| 1422 | Y10B_A | D6B_A  | I20B_N | K17B_S | 2.2E-07 | 9.5E-07 | 6.075E-07 | 2.024E-07 |
| 1423 | Y10B_A | I20B_S | V24B_T | Q14B_A | 3.6E-07 | 8.3E-07 | 6.080E-07 | 1.435E-07 |
| 1424 | Y10B_A | S8B_A  | I20B_Q | L23B_Q | 3.1E-07 | 1.4E-06 | 6.090E-07 | 2.779E-07 |
| 1425 | G13B_A | F3B_A  | I20B_S | F19B_W | 3.5E-07 | 1.0E-06 | 6.090E-07 | 1.852E-07 |
| 1426 | Y10B_A | I20B_Q | V24B_Q | Q14B_A | 3.4E-07 | 8.8E-07 | 6.090E-07 | 1.444E-07 |
| 1427 | Y10B_A | D6B_A  | I20B_S | F19B_Q | 2.4E-07 | 1.1E-06 | 6.095E-07 | 2.226E-07 |
| 1428 | G13B_A | E18B_T | S9B_A  | V24B_T | 3.6E-07 | 9.2E-07 | 6.100E-07 | 1.484E-07 |
| 1429 | G13B_A | I20B_T | S5B_A  | F19B_W | 3.3E-07 | 1.1E-06 | 6.100E-07 | 1.841E-07 |
| 1430 | G13B_A | A16B_N | I20B_T | F19B_W | 1.9E-07 | 1.5E-06 | 6.105E-07 | 3.435E-07 |
| 1431 | Y10B_A | I20B_S | L23B_Q | Q14B_A | 3.1E-07 | 1.3E-06 | 6.105E-07 | 2.373E-07 |
| 1432 | S8B_A  | G13B_W | I20B_Q | G1B_A  | 3.3E-07 | 1.0E-06 | 6.105E-07 | 1.969E-07 |
| 1433 | G13B_A | D6B_A  | I20B_T | F19B_W | 1.5E-07 | 1.2E-06 | 6.105E-07 | 2.540E-07 |
| 1434 | Y10B_A | D6B_A  | E18B_T | I20B_Q | 3.1E-07 | 1.2E-06 | 6.115E-07 | 2.479E-07 |
| 1435 | G13B_A | A16B_N | I20B_N | E12B_A | 1.4E-07 | 1.0E-06 | 6.115E-07 | 2.925E-07 |
| 1436 | Y10B_A | G13B_W | I20B_T | G1B_R  | 4.5E-07 | 8.6E-07 | 6.115E-07 | 1.249E-07 |
| 1437 | Y10B_A | G13B_W | A16B_N | I20B_Q | 9.3E-08 | 1.3E-06 | 6.116E-07 | 3.040E-07 |
| 1438 | G13B_A | I20B_Q | E12B_A | G1B_A  | 2.8E-07 | 1.0E-06 | 6.120E-07 | 2.120E-07 |
| 1439 | G13B_A | S8B_A  | I20B_N | K17B_S | 3.5E-07 | 9.3E-07 | 6.120E-07 | 1.552E-07 |
| 1440 | Y10B_A | V7B_A  | I20B_N | K17B_S | 3.3E-07 | 9.4E-07 | 6.125E-07 | 2.074E-07 |
| 1441 | Y10B_A | A16B_N | I20B_N | E18B_T | 1.1E-07 | 1.5E-06 | 6.125E-07 | 3.683E-07 |
| 1442 | S8B_A  | D6B_A  | I20B_N | K17B_S | 3.5E-07 | 1.1E-06 | 6.125E-07 | 2.190E-07 |
| 1443 | Y10B_A | I20B_N | G1B_R  | F19B_W | 3.1E-07 | 1.0E-06 | 6.125E-07 | 1.744E-07 |
| 1444 | Y10B_A | I20B_S | F19B_W | E12B_A | 2.9E-07 | 1.1E-06 | 6.130E-07 | 1.944E-07 |
| 1445 | S8B_A  | D6B_A  | I20B_T | F19B_Q | 1.9E-07 | 9.5E-07 | 6.140E-07 | 2.165E-07 |
| 1446 | G13B_A | A16B_N | I20B_N | E18B_T | 1.2E-07 | 1.3E-06 | 6.140E-07 | 2.918E-07 |
| 1447 | G13B_A | D6B_A  | I20B_N | S9B_A  | 3.4E-07 | 8.9E-07 | 6.145E-07 | 1.385E-07 |
| 1448 | G13B_A | I20B_N | L11B_A | E12B_A | 3.5E-07 | 8.9E-07 | 6.150E-07 | 1.242E-07 |
| 1449 | G13B_A | S8B_A  | I20B_S | S9B_A  | 3.0E-07 | 1.1E-06 | 6.150E-07 | 1.925E-07 |
| 1450 | G13B_A | L11B_A | I20B_Q | G1B_R  | 3.6E-07 | 1.0E-06 | 6.155E-07 | 2.167E-07 |
| 1451 | S8B_A  | G13B_W | I20B_T | G1B_R  | 3.9E-07 | 8.5E-07 | 6.155E-07 | 1.437E-07 |
| 1452 | G13B_A | I20B_Q | T4B_A  | S9B_A  | 1.7E-07 | 9.4E-07 | 6.155E-07 | 2.051E-07 |
| 1453 | Y10B_A | F3B_A  | I20B_Q | F19B_W | 2.8E-07 | 1.2E-06 | 6.160E-07 | 2.584E-07 |
| 1454 | Y10B_A | I20B_T | K17B_S | G1B_A  | 2.9E-07 | 8.9E-07 | 6.165E-07 | 1.491E-07 |
| 1455 | G13B_A | I20B_Q | K17B_S | Q14B_A | 2.4E-07 | 1.0E-06 | 6.165E-07 | 2.157E-07 |

|      |        |        |        |        |         |         |           |           |
|------|--------|--------|--------|--------|---------|---------|-----------|-----------|
| 1456 | Y10B_A | E18B_T | I20B_T | F19B_A | 2.6E-07 | 8.4E-07 | 6.170E-07 | 1.724E-07 |
| 1457 | Y10B_A | I20B_N | K17B_S | F19B_A | 1.6E-07 | 1.1E-06 | 6.170E-07 | 2.606E-07 |
| 1458 | G13B_A | I20B_Q | S9B_A  | Q14B_A | 2.9E-07 | 9.4E-07 | 6.175E-07 | 1.583E-07 |
| 1459 | Y10B_A | F19B_W | L23B_Q | V24B_T | 2.6E-07 | 1.3E-06 | 6.175E-07 | 2.630E-07 |
| 1460 | Y10B_A | V7B_A  | I20B_T | F19B_Q | 3.0E-07 | 1.0E-06 | 6.180E-07 | 1.847E-07 |
| 1461 | Y10B_A | I20B_N | V24B_T | Q14B_A | 3.6E-07 | 1.1E-06 | 6.185E-07 | 2.190E-07 |
| 1462 | Y10B_A | I20B_S | E18B_A | L23B_Q | 3.0E-07 | 1.2E-06 | 6.190E-07 | 2.734E-07 |
| 1463 | G13B_A | V7B_A  | A16B_N | I20B_S | 1.4E-07 | 1.3E-06 | 6.195E-07 | 3.308E-07 |
| 1464 | G13B_A | F3B_A  | I20B_T | E12B_A | 2.9E-07 | 1.1E-06 | 6.195E-07 | 2.082E-07 |
| 1465 | G13B_A | S9B_A  | L23B_Q | K17B_S | 3.8E-07 | 9.0E-07 | 6.200E-07 | 1.496E-07 |
| 1466 | Y10B_A | L23B_R | V24B_Q | E12B_A | 2.6E-07 | 9.7E-07 | 6.200E-07 | 1.760E-07 |
| 1467 | G13B_A | F19B_W | L23B_R | V24B_Q | 2.8E-07 | 9.7E-07 | 6.205E-07 | 1.717E-07 |
| 1468 | G13B_A | I20B_N | T4B_A  | K17B_S | 2.8E-07 | 1.0E-06 | 6.210E-07 | 2.241E-07 |
| 1469 | Y10B_A | I20B_N | L11B_A | F19B_Q | 2.1E-07 | 1.1E-06 | 6.210E-07 | 2.592E-07 |
| 1470 | Y10B_A | G13B_W | I20B_Q | G1B_A  | 3.3E-07 | 1.2E-06 | 6.215E-07 | 2.475E-07 |
| 1471 | G13B_A | I20B_S | T4B_A  | K17B_S | 2.4E-07 | 8.9E-07 | 6.215E-07 | 1.705E-07 |
| 1472 | Y10B_A | S8B_A  | I20B_S | V24B_Q | 3.6E-07 | 9.8E-07 | 6.220E-07 | 1.645E-07 |
| 1473 | Y10B_A | G13B_W | I20B_N | G1B_R  | 5.1E-07 | 9.9E-07 | 6.220E-07 | 1.237E-07 |
| 1474 | Y10B_A | I20B_Q | K17B_A | V24B_Q | 3.1E-07 | 1.0E-06 | 6.225E-07 | 2.077E-07 |
| 1475 | Y10B_A | I20B_N | S5B_A  | L23B_R | 3.8E-07 | 1.0E-06 | 6.225E-07 | 1.765E-07 |
| 1476 | G13B_A | F3B_A  | I20B_T | F19B_W | 3.1E-07 | 1.1E-06 | 6.230E-07 | 2.368E-07 |
| 1477 | Y10B_A | L23B_Q | K17B_S | V24B_Q | 2.6E-07 | 1.2E-06 | 6.230E-07 | 2.395E-07 |
| 1478 | Y10B_A | E18B_T | I20B_Q | G1B_R  | 3.2E-07 | 1.2E-06 | 6.230E-07 | 2.214E-07 |
| 1479 | Y10B_A | F3B_A  | I20B_Q | S9B_A  | 2.9E-07 | 1.3E-06 | 6.240E-07 | 2.431E-07 |
| 1480 | G13B_A | S8B_A  | I20B_Q | F19B_W | 2.7E-07 | 1.3E-06 | 6.240E-07 | 2.748E-07 |
| 1481 | Y10B_A | G13B_W | I20B_T | F19B_A | 3.0E-07 | 9.7E-07 | 6.240E-07 | 2.088E-07 |
| 1482 | G13B_A | A16B_N | I20B_S | E12B_A | 2.5E-07 | 1.2E-06 | 6.245E-07 | 2.477E-07 |
| 1483 | G13B_A | I20B_S | E18B_A | F19B_W | 2.3E-07 | 1.2E-06 | 6.250E-07 | 2.260E-07 |
| 1484 | G13B_A | Y10B_A | I20B_T | K17B_S | 2.8E-07 | 1.0E-06 | 6.250E-07 | 2.085E-07 |
| 1485 | Y10B_A | E18B_T | K17B_S | V24B_Q | 2.0E-07 | 1.1E-06 | 6.250E-07 | 2.696E-07 |
| 1486 | Y10B_A | A16B_N | I20B_T | K17B_S | 8.4E-08 | 1.3E-06 | 6.252E-07 | 2.990E-07 |
| 1487 | S8B_A  | D6B_A  | I20B_Q | F19B_Q | 2.4E-07 | 1.3E-06 | 6.255E-07 | 2.930E-07 |
| 1488 | Y10B_A | F3B_A  | I20B_N | F19B_Q | 1.9E-07 | 1.4E-06 | 6.255E-07 | 2.911E-07 |
| 1489 | Y10B_A | I20B_S | E18B_A | V24B_T | 2.9E-07 | 1.1E-06 | 6.255E-07 | 2.033E-07 |
| 1490 | G13B_A | I20B_Q | K17B_A | F19B_Q | 2.0E-07 | 1.2E-06 | 6.255E-07 | 2.898E-07 |
| 1491 | Y10B_A | S8B_A  | I20B_N | V24B_T | 3.4E-07 | 9.8E-07 | 6.260E-07 | 1.560E-07 |
| 1492 | Y10B_A | E18B_T | L23B_Q | V24B_Q | 2.3E-07 | 9.9E-07 | 6.260E-07 | 2.000E-07 |
| 1493 | G13B_A | D6B_A  | I20B_N | E18B_T | 2.9E-07 | 1.3E-06 | 6.260E-07 | 2.418E-07 |
| 1494 | G13B_A | I20B_S | E12B_A | G1B_A  | 4.0E-07 | 9.3E-07 | 6.265E-07 | 1.275E-07 |
| 1495 | Y10B_A | I20B_T | L11B_A | S9B_A  | 2.9E-07 | 1.1E-06 | 6.265E-07 | 1.861E-07 |
| 1496 | Y10B_A | I20B_T | S5B_A  | V24B_Q | 4.2E-07 | 9.3E-07 | 6.280E-07 | 1.529E-07 |
| 1497 | Y10B_A | L11B_A | I20B_Q | S9B_A  | 3.5E-07 | 9.8E-07 | 6.285E-07 | 1.855E-07 |
| 1498 | Y10B_A | I20B_S | S5B_A  | L23B_R | 3.2E-07 | 1.4E-06 | 6.290E-07 | 2.653E-07 |
| 1499 | Y10B_A | I20B_S | T2B_A  | V24B_N | 3.4E-07 | 9.3E-07 | 6.295E-07 | 1.542E-07 |
| 1500 | G13B_A | D6B_A  | I20B_S | E12B_A | 3.5E-07 | 1.0E-06 | 6.295E-07 | 1.748E-07 |
| 1501 | Y10B_A | I20B_S | K17B_S | G1B_A  | 2.8E-07 | 1.3E-06 | 6.295E-07 | 2.420E-07 |
| 1502 | Y10B_A | I20B_T | E18B_A | F19B_Q | 3.4E-07 | 9.3E-07 | 6.295E-07 | 1.891E-07 |
| 1503 | Y10B_A | I20B_Q | S5B_A  | L23B_Q | 2.5E-07 | 1.0E-06 | 6.300E-07 | 2.357E-07 |
| 1504 | Y10B_A | I20B_Q | G1B_R  | F19B_W | 3.1E-07 | 1.2E-06 | 6.305E-07 | 2.245E-07 |
| 1505 | Y10B_A | I20B_N | L23B_Q | Q14B_A | 2.0E-07 | 1.2E-06 | 6.310E-07 | 2.677E-07 |
| 1506 | Y10B_A | S8B_A  | I20B_T | L23B_R | 3.8E-07 | 9.2E-07 | 6.310E-07 | 1.650E-07 |
| 1507 | G13B_A | I20B_S | F19B_A | E12B_A | 3.4E-07 | 1.1E-06 | 6.315E-07 | 2.397E-07 |

|      |        |        |        |        |         |         |           |           |
|------|--------|--------|--------|--------|---------|---------|-----------|-----------|
| 1508 | Y10B_A | A16B_N | I20B_N | F19B_W | 1.0E-07 | 1.2E-06 | 6.315E-07 | 2.865E-07 |
| 1509 | Y10B_A | G13B_W | I20B_S | F19B_A | 3.5E-07 | 1.2E-06 | 6.315E-07 | 2.140E-07 |
| 1510 | Y10B_A | I20B_Q | T4B_A  | V24B_Q | 2.9E-07 | 1.1E-06 | 6.320E-07 | 2.001E-07 |
| 1511 | Y10B_A | I20B_Q | S9B_A  | G1B_A  | 3.4E-07 | 1.1E-06 | 6.320E-07 | 1.896E-07 |
| 1512 | Y10B_A | I20B_Q | G1B_R  | E12B_A | 2.5E-07 | 1.1E-06 | 6.325E-07 | 2.514E-07 |
| 1513 | Y10B_A | I20B_N | S5B_A  | V24B_Q | 3.7E-07 | 9.8E-07 | 6.330E-07 | 1.580E-07 |
| 1514 | G13B_A | A16B_N | I20B_Q | G1B_R  | 1.1E-07 | 1.1E-06 | 6.330E-07 | 3.283E-07 |
| 1515 | Y10B_A | I20B_T | S5B_A  | L23B_Q | 2.5E-07 | 1.2E-06 | 6.335E-07 | 2.313E-07 |
| 1516 | Y10B_A | I20B_Q | E18B_A | F19B_Q | 2.5E-07 | 1.2E-06 | 6.335E-07 | 2.716E-07 |
| 1517 | Y10B_A | I20B_Q | K17B_A | V24B_N | 2.2E-07 | 1.0E-06 | 6.335E-07 | 2.408E-07 |
| 1518 | G13B_A | Y10B_A | I20B_Q | E12B_A | 3.1E-07 | 1.0E-06 | 6.335E-07 | 1.937E-07 |
| 1519 | Y10B_A | V7B_A  | E18B_T | I20B_T | 4.2E-07 | 1.0E-06 | 6.335E-07 | 1.461E-07 |
| 1520 | G13B_A | D6B_A  | I20B_T | E12B_A | 4.3E-07 | 9.5E-07 | 6.335E-07 | 1.454E-07 |
| 1521 | G13B_A | G1B_R  | L23B_R | V24B_T | 3.8E-07 | 1.2E-06 | 6.350E-07 | 2.055E-07 |
| 1522 | Y10B_A | V7B_A  | E18B_T | I20B_S | 3.6E-07 | 1.0E-06 | 6.350E-07 | 2.099E-07 |
| 1523 | Y10B_A | E18B_T | L23B_R | V24B_Q | 2.9E-07 | 9.3E-07 | 6.350E-07 | 1.772E-07 |
| 1524 | G13B_A | I20B_Q | S5B_A  | F19B_W | 2.3E-07 | 1.8E-06 | 6.355E-07 | 3.318E-07 |
| 1525 | G13B_A | I20B_T | K17B_S | T2B_A  | 3.2E-07 | 1.0E-06 | 6.355E-07 | 2.067E-07 |
| 1526 | Y10B_A | V7B_A  | I20B_S | K17B_S | 2.1E-07 | 9.7E-07 | 6.355E-07 | 2.096E-07 |
| 1527 | Y10B_A | D6B_A  | I20B_T | F19B_Q | 2.0E-07 | 1.4E-06 | 6.360E-07 | 3.182E-07 |
| 1528 | Y10B_A | I20B_Q | S5B_A  | V24B_T | 2.9E-07 | 1.2E-06 | 6.360E-07 | 2.316E-07 |
| 1529 | Y10B_A | F3B_A  | I20B_Q | K17B_S | 2.2E-07 | 1.2E-06 | 6.365E-07 | 2.391E-07 |
| 1530 | Y10B_A | I20B_T | T4B_A  | V24B_T | 4.2E-07 | 1.3E-06 | 6.370E-07 | 1.901E-07 |
| 1531 | Y10B_A | I20B_N | K17B_A | V24B_N | 4.0E-07 | 1.1E-06 | 6.370E-07 | 1.873E-07 |
| 1532 | Y10B_A | G13B_W | I20B_N | G1B_A  | 3.3E-07 | 1.1E-06 | 6.370E-07 | 2.150E-07 |
| 1533 | S8B_A  | D6B_A  | I20B_T | K17B_S | 3.3E-07 | 9.5E-07 | 6.375E-07 | 1.638E-07 |
| 1534 | S8B_A  | G13B_W | L23B_Q | V24B_T | 3.8E-07 | 1.2E-06 | 6.375E-07 | 2.124E-07 |
| 1535 | G13B_A | S8B_A  | I20B_N | E18B_T | 3.6E-07 | 1.1E-06 | 6.390E-07 | 2.056E-07 |
| 1536 | Y10B_A | I20B_Q | G1B_R  | S9B_A  | 3.9E-07 | 1.0E-06 | 6.395E-07 | 1.961E-07 |
| 1537 | Y10B_A | G13B_W | I20B_S | G1B_R  | 4.5E-07 | 8.9E-07 | 6.400E-07 | 1.335E-07 |
| 1538 | G13B_A | I20B_T | S5B_A  | K17B_S | 3.6E-07 | 1.4E-06 | 6.400E-07 | 2.458E-07 |
| 1539 | G13B_A | D6B_A  | I20B_Q | G1B_R  | 2.7E-07 | 1.4E-06 | 6.400E-07 | 2.848E-07 |
| 1540 | G13B_A | D6B_A  | I20B_Q | F19B_A | 3.1E-07 | 9.8E-07 | 6.405E-07 | 1.902E-07 |
| 1541 | G13B_A | G1B_R  | L23B_Q | V24B_Q | 3.5E-07 | 1.0E-06 | 6.410E-07 | 1.786E-07 |
| 1542 | Y10B_A | I20B_N | S5B_A  | V24B_T | 3.7E-07 | 9.8E-07 | 6.415E-07 | 1.633E-07 |
| 1543 | Y10B_A | G13B_W | I20B_T | L11B_A | 3.5E-07 | 1.1E-06 | 6.415E-07 | 1.731E-07 |
| 1544 | G13B_A | I20B_S | K17B_A | L23B_Q | 1.8E-07 | 9.9E-07 | 6.420E-07 | 2.204E-07 |
| 1545 | G13B_A | E18B_T | I20B_Q | T4B_A  | 2.9E-07 | 1.1E-06 | 6.420E-07 | 2.280E-07 |
| 1546 | Y10B_A | G13B_W | L11B_A | I20B_Q | 3.3E-07 | 1.1E-06 | 6.425E-07 | 2.140E-07 |
| 1547 | G13B_A | I20B_T | T4B_A  | K17B_S | 3.8E-07 | 1.1E-06 | 6.430E-07 | 2.018E-07 |
| 1548 | G13B_A | E18B_T | S9B_A  | V24B_N | 3.9E-07 | 1.0E-06 | 6.435E-07 | 1.727E-07 |
| 1549 | G13B_A | E18B_T | K17B_S | V24B_T | 3.4E-07 | 1.0E-06 | 6.435E-07 | 2.057E-07 |
| 1550 | Y10B_A | F3B_A  | I20B_S | K17B_S | 3.6E-07 | 1.2E-06 | 6.435E-07 | 2.341E-07 |
| 1551 | Y10B_A | E18B_T | L23B_Q | V24B_T | 2.0E-07 | 1.8E-06 | 6.440E-07 | 3.284E-07 |
| 1552 | S8B_A  | G13B_W | L23B_R | V24B_Q | 2.8E-07 | 1.1E-06 | 6.445E-07 | 2.233E-07 |
| 1553 | Y10B_A | S8B_A  | I20B_S | L23B_Q | 2.4E-07 | 1.0E-06 | 6.450E-07 | 2.386E-07 |
| 1554 | G13B_A | I20B_Q | E18B_A | F19B_W | 2.7E-07 | 1.5E-06 | 6.450E-07 | 3.092E-07 |
| 1555 | Y10B_A | E18B_T | L11B_A | I20B_S | 4.2E-07 | 9.8E-07 | 6.450E-07 | 1.457E-07 |
| 1556 | Y10B_A | S8B_A  | I20B_S | L23B_R | 2.6E-07 | 1.0E-06 | 6.450E-07 | 2.325E-07 |
| 1557 | G13B_A | S9B_A  | E12B_A | V24B_N | 3.4E-07 | 9.9E-07 | 6.455E-07 | 2.004E-07 |
| 1558 | G13B_A | I20B_Q | K17B_A | L23B_Q | 3.7E-07 | 1.2E-06 | 6.455E-07 | 2.550E-07 |
| 1559 | G13B_A | I20B_N | K17B_A | L23B_R | 3.8E-07 | 1.2E-06 | 6.465E-07 | 2.230E-07 |

|      |        |        |        |        |         |         |           |           |
|------|--------|--------|--------|--------|---------|---------|-----------|-----------|
| 1560 | G13B_A | I20B_N | E18B_A | E12B_A | 4.1E-07 | 9.5E-07 | 6.465E-07 | 1.815E-07 |
| 1561 | Y10B_A | E18B_T | I20B_T | G1B_R  | 3.3E-07 | 9.2E-07 | 6.470E-07 | 1.829E-07 |
| 1562 | Y10B_A | E18B_T | I20B_Q | G1B_A  | 2.9E-07 | 1.1E-06 | 6.475E-07 | 2.123E-07 |
| 1563 | G13B_A | F19B_W | S9B_A  | V24B_Q | 3.7E-07 | 1.5E-06 | 6.480E-07 | 2.463E-07 |
| 1564 | Y10B_A | I20B_N | E18B_T | F19B_A | 3.7E-07 | 1.3E-06 | 6.480E-07 | 2.604E-07 |
| 1565 | Y10B_A | I20B_T | G1B_R  | S9B_A  | 4.6E-07 | 9.2E-07 | 6.480E-07 | 1.260E-07 |
| 1566 | Y10B_A | V7B_A  | I20B_Q | S9B_A  | 2.9E-07 | 1.1E-06 | 6.490E-07 | 2.440E-07 |
| 1567 | G13B_A | I20B_T | T4B_A  | S9B_A  | 3.6E-07 | 1.1E-06 | 6.490E-07 | 1.903E-07 |
| 1568 | Y10B_A | F19B_Q | L23B_R | V24B_N | 3.5E-07 | 1.2E-06 | 6.490E-07 | 2.272E-07 |
| 1569 | G13B_A | A16B_N | I20B_S | F19B_A | 2.5E-07 | 1.3E-06 | 6.495E-07 | 3.509E-07 |
| 1570 | Y10B_A | G13B_W | V7B_A  | I20B_S | 3.8E-07 | 1.1E-06 | 6.495E-07 | 2.085E-07 |
| 1571 | G13B_A | I20B_T | S5B_A  | F19B_Q | 1.8E-07 | 1.7E-06 | 6.500E-07 | 3.684E-07 |
| 1572 | Y10B_A | F19B_Q | L23B_Q | K17B_S | 3.5E-07 | 1.2E-06 | 6.500E-07 | 2.556E-07 |
| 1573 | S8B_A  | D6B_A  | I20B_T | L23B_Q | 3.0E-07 | 1.1E-06 | 6.510E-07 | 1.818E-07 |
| 1574 | G13B_A | I20B_S | K17B_S | Q14B_A | 3.8E-07 | 1.1E-06 | 6.515E-07 | 2.073E-07 |
| 1575 | Y10B_A | E18B_T | I20B_Q | T2B_A  | 3.3E-07 | 1.4E-06 | 6.515E-07 | 2.521E-07 |
| 1576 | Y10B_A | G13B_W | A16B_N | I20B_N | 2.1E-07 | 1.4E-06 | 6.515E-07 | 3.169E-07 |
| 1577 | G13B_A | I20B_Q | T4B_A  | K17B_S | 4.2E-07 | 8.9E-07 | 6.525E-07 | 1.583E-07 |
| 1578 | Y10B_A | G13B_W | I20B_Q | F19B_A | 3.5E-07 | 1.2E-06 | 6.525E-07 | 2.420E-07 |
| 1579 | Y10B_A | I20B_Q | L23B_R | Q14B_A | 2.9E-07 | 1.4E-06 | 6.530E-07 | 2.755E-07 |
| 1580 | G13B_A | G1B_R  | L23B_Q | V24B_N | 3.0E-07 | 1.2E-06 | 6.540E-07 | 2.221E-07 |
| 1581 | G13B_A | V7B_A  | I20B_S | E12B_A | 2.9E-07 | 9.4E-07 | 6.540E-07 | 1.525E-07 |
| 1582 | S8B_A  | G13B_W | F19B_Q | V24B_Q | 3.0E-07 | 1.4E-06 | 6.540E-07 | 2.549E-07 |
| 1583 | G13B_A | F19B_W | K17B_S | V24B_T | 3.9E-07 | 1.3E-06 | 6.545E-07 | 2.204E-07 |
| 1584 | G13B_A | I20B_Q | S9B_A  | T2B_A  | 3.4E-07 | 1.1E-06 | 6.550E-07 | 1.832E-07 |
| 1585 | G13B_A | F3B_A  | I20B_N | G1B_R  | 2.8E-07 | 1.4E-06 | 6.550E-07 | 2.463E-07 |
| 1586 | Y10B_A | F3B_A  | I20B_N | S9B_A  | 3.6E-07 | 9.3E-07 | 6.555E-07 | 1.781E-07 |
| 1587 | S8B_A  | G13B_W | I20B_S | F19B_A | 2.0E-07 | 1.6E-06 | 6.560E-07 | 3.055E-07 |
| 1588 | S8B_A  | G13B_W | L23B_R | V24B_N | 2.4E-07 | 1.5E-06 | 6.565E-07 | 2.810E-07 |
| 1589 | Y10B_A | I20B_N | F19B_Q | T2B_A  | 1.7E-07 | 1.4E-06 | 6.575E-07 | 2.777E-07 |
| 1590 | Y10B_A | L23B_Q | K17B_S | V24B_N | 2.6E-07 | 1.2E-06 | 6.575E-07 | 3.481E-07 |
| 1591 | G13B_A | E18B_T | I20B_Q | S5B_A  | 2.5E-07 | 1.6E-06 | 6.575E-07 | 3.386E-07 |
| 1592 | Y10B_A | S9B_A  | L23B_R | V24B_T | 3.4E-07 | 9.0E-07 | 6.580E-07 | 1.598E-07 |
| 1593 | Y10B_A | I20B_S | L23B_R | Q14B_A | 3.2E-07 | 1.2E-06 | 6.585E-07 | 2.299E-07 |
| 1594 | Y10B_A | G13B_W | F19B_Q | V24B_Q | 2.5E-07 | 1.5E-06 | 6.595E-07 | 3.061E-07 |
| 1595 | G13B_A | S9B_A  | V24B_Q | E12B_A | 3.3E-07 | 1.1E-06 | 6.595E-07 | 2.043E-07 |
| 1596 | Y10B_A | I20B_T | F19B_W | G1B_A  | 3.3E-07 | 1.1E-06 | 6.595E-07 | 2.028E-07 |
| 1597 | S8B_A  | G13B_W | F3B_A  | I20B_Q | 3.5E-07 | 1.1E-06 | 6.605E-07 | 2.325E-07 |
| 1598 | G13B_A | E18B_T | E12B_A | V24B_N | 2.5E-07 | 1.5E-06 | 6.605E-07 | 2.722E-07 |
| 1599 | Y10B_A | F3B_A  | E18B_T | I20B_T | 4.2E-07 | 1.4E-06 | 6.610E-07 | 2.352E-07 |
| 1600 | G13B_A | D6B_A  | I20B_N | E12B_A | 3.7E-07 | 8.6E-07 | 6.615E-07 | 1.654E-07 |
| 1601 | G13B_A | Y10B_A | I20B_N | E12B_A | 3.8E-07 | 1.0E-06 | 6.615E-07 | 1.777E-07 |
| 1602 | Y10B_A | L23B_Q | V24B_Q | E12B_A | 3.7E-07 | 1.1E-06 | 6.615E-07 | 2.085E-07 |
| 1603 | Y10B_A | F3B_A  | I20B_T | K17B_S | 3.6E-07 | 1.8E-06 | 6.615E-07 | 3.157E-07 |
| 1604 | G13B_A | L23B_Q | V24B_N | G1B_A  | 3.9E-07 | 8.8E-07 | 6.620E-07 | 1.338E-07 |
| 1605 | S8B_A  | D6B_A  | I20B_Q | F19B_W | 3.0E-07 | 1.1E-06 | 6.620E-07 | 1.880E-07 |
| 1606 | S8B_A  | D6B_A  | I20B_N | E18B_T | 3.8E-07 | 1.0E-06 | 6.625E-07 | 1.871E-07 |
| 1607 | G13B_A | F3B_A  | L11B_A | I20B_Q | 3.3E-07 | 1.2E-06 | 6.625E-07 | 2.046E-07 |
| 1608 | G13B_A | I20B_S | S5B_A  | K17B_S | 3.3E-07 | 9.3E-07 | 6.625E-07 | 1.463E-07 |
| 1609 | Y10B_A | I20B_T | T4B_A  | L23B_Q | 3.8E-07 | 1.2E-06 | 6.630E-07 | 2.036E-07 |
| 1610 | G13B_A | A16B_N | I20B_T | G1B_R  | 1.5E-07 | 1.2E-06 | 6.630E-07 | 2.924E-07 |
| 1611 | Y10B_A | F3B_A  | E18B_T | I20B_S | 2.9E-07 | 1.2E-06 | 6.630E-07 | 2.211E-07 |



|      |        |        |        |        |         |         |           |           |
|------|--------|--------|--------|--------|---------|---------|-----------|-----------|
| 1612 | Y10B_A | I20B_N | L23B_R | T2B_A  | 4.5E-07 | 9.2E-07 | 6.630E-07 | 1.407E-07 |
| 1613 | Y10B_A | L23B_R | E12B_A | V24B_N | 3.1E-07 | 1.0E-06 | 6.635E-07 | 1.964E-07 |
| 1614 | Y10B_A | I20B_S | F19B_Q | G1B_A  | 3.5E-07 | 2.0E-06 | 6.635E-07 | 3.467E-07 |
| 1615 | S8B_A  | D6B_A  | G13B_W | I20B_Q | 4.2E-07 | 1.1E-06 | 6.635E-07 | 2.284E-07 |
| 1616 | Y10B_A | A16B_N | I20B_N | L23B_Q | 2.9E-07 | 1.2E-06 | 6.645E-07 | 2.302E-07 |
| 1617 | G13B_A | I20B_T | L11B_A | G1B_R  | 3.7E-07 | 1.0E-06 | 6.655E-07 | 2.053E-07 |
| 1618 | Y10B_A | I20B_T | S9B_A  | F19B_A | 3.4E-07 | 1.5E-06 | 6.655E-07 | 2.963E-07 |
| 1619 | Y10B_A | I20B_S | E18B_A | F19B_Q | 2.9E-07 | 1.6E-06 | 6.655E-07 | 3.853E-07 |
| 1620 | G13B_A | I20B_S | T4B_A  | S9B_A  | 3.7E-07 | 9.4E-07 | 6.660E-07 | 1.743E-07 |
| 1621 | G13B_A | I20B_Q | F19B_A | G1B_A  | 3.4E-07 | 1.0E-06 | 6.665E-07 | 2.089E-07 |
| 1622 | Y10B_A | I20B_T | S5B_A  | V24B_T | 3.6E-07 | 9.3E-07 | 6.665E-07 | 1.566E-07 |
| 1623 | G13B_A | A16B_N | I20B_T | E12B_A | 2.0E-07 | 1.0E-06 | 6.665E-07 | 2.004E-07 |
| 1624 | Y10B_A | A16B_N | E18B_T | I20B_T | 2.9E-07 | 1.1E-06 | 6.670E-07 | 2.051E-07 |
| 1625 | Y10B_A | I20B_T | T4B_A  | L23B_R | 4.5E-07 | 9.9E-07 | 6.675E-07 | 1.362E-07 |
| 1626 | Y10B_A | E18B_T | I20B_S | F19B_A | 3.1E-07 | 1.4E-06 | 6.680E-07 | 2.983E-07 |
| 1627 | G13B_A | G1B_R  | L23B_R | V24B_N | 4.3E-07 | 9.8E-07 | 6.680E-07 | 1.456E-07 |
| 1628 | G13B_A | K17B_S | V24B_Q | E12B_A | 3.9E-07 | 9.4E-07 | 6.685E-07 | 1.503E-07 |
| 1629 | G13B_A | Y10B_A | I20B_S | K17B_S | 3.3E-07 | 1.0E-06 | 6.685E-07 | 1.774E-07 |
| 1630 | S8B_A  | D6B_A  | I20B_S | K17B_S | 4.3E-07 | 1.2E-06 | 6.685E-07 | 2.226E-07 |
| 1631 | Y10B_A | S9B_A  | L23B_Q | V24B_N | 3.1E-07 | 1.2E-06 | 6.690E-07 | 2.705E-07 |
| 1632 | Y10B_A | E18B_T | I20B_S | G1B_R  | 3.3E-07 | 9.5E-07 | 6.695E-07 | 1.491E-07 |
| 1633 | G13B_A | V7B_A  | L23B_R | V24B_Q | 3.3E-07 | 1.0E-06 | 6.695E-07 | 1.819E-07 |
| 1634 | G13B_A | L23B_R | K17B_S | E12B_A | 2.9E-07 | 1.2E-06 | 6.700E-07 | 2.497E-07 |
| 1635 | Y10B_A | S8B_A  | I20B_T | V24B_T | 4.2E-07 | 9.8E-07 | 6.700E-07 | 1.574E-07 |
| 1636 | Y10B_A | A16B_N | I20B_N | S9B_A  | 1.1E-07 | 1.5E-06 | 6.705E-07 | 2.922E-07 |
| 1637 | G13B_A | S8B_A  | I20B_Q | E12B_A | 3.7E-07 | 1.2E-06 | 6.710E-07 | 2.342E-07 |
| 1638 | Y10B_A | F3B_A  | I20B_T | S9B_A  | 3.1E-07 | 1.1E-06 | 6.710E-07 | 1.603E-07 |
| 1639 | G13B_A | E18B_T | F19B_W | V24B_N | 3.6E-07 | 1.0E-06 | 6.715E-07 | 2.145E-07 |
| 1640 | S8B_A  | G13B_W | L23B_R | V24B_T | 4.1E-07 | 1.1E-06 | 6.715E-07 | 1.890E-07 |
| 1641 | Y10B_A | I20B_S | V24B_T | T2B_A  | 3.2E-07 | 9.7E-07 | 6.720E-07 | 1.670E-07 |
| 1642 | G13B_A | Y10B_A | E18B_T | I20B_Q | 2.9E-07 | 1.3E-06 | 6.720E-07 | 2.717E-07 |
| 1643 | Y10B_A | S8B_A  | I20B_T | V24B_Q | 4.0E-07 | 1.3E-06 | 6.720E-07 | 2.134E-07 |
| 1644 | G13B_A | E18B_T | L23B_R | K17B_S | 3.8E-07 | 1.1E-06 | 6.730E-07 | 2.475E-07 |
| 1645 | G13B_A | E18B_T | L23B_Q | E12B_A | 3.7E-07 | 1.2E-06 | 6.735E-07 | 1.994E-07 |
| 1646 | G13B_A | I20B_N | K17B_S | T2B_A  | 2.8E-07 | 1.6E-06 | 6.735E-07 | 3.176E-07 |
| 1647 | G13B_A | V7B_A  | I20B_Q | F19B_A | 3.3E-07 | 1.4E-06 | 6.735E-07 | 3.121E-07 |
| 1648 | G13B_A | A16B_N | L23B_Q | V24B_N | 2.1E-07 | 1.0E-06 | 6.735E-07 | 2.113E-07 |
| 1649 | G13B_A | I20B_N | E18B_T | T2B_A  | 3.6E-07 | 1.4E-06 | 6.745E-07 | 2.807E-07 |
| 1650 | Y10B_A | L11B_A | I20B_S | F19B_W | 2.8E-07 | 9.8E-07 | 6.745E-07 | 2.234E-07 |
| 1651 | G13B_A | Y10B_A | I20B_N | E18B_T | 3.6E-07 | 1.2E-06 | 6.745E-07 | 2.215E-07 |
| 1652 | Y10B_A | E18B_T | F19B_Q | V24B_N | 2.5E-07 | 1.3E-06 | 6.745E-07 | 2.965E-07 |
| 1653 | G13B_A | D6B_A  | I20B_T | F19B_A | 3.7E-07 | 1.0E-06 | 6.745E-07 | 2.031E-07 |
| 1654 | Y10B_A | I20B_Q | E18B_A | S9B_A  | 3.7E-07 | 1.0E-06 | 6.750E-07 | 1.831E-07 |
| 1655 | G13B_A | E18B_T | F19B_Q | S9B_A  | 3.3E-07 | 1.3E-06 | 6.750E-07 | 2.732E-07 |
| 1656 | Y10B_A | G13B_W | F3B_A  | I20B_S | 3.5E-07 | 1.1E-06 | 6.750E-07 | 1.855E-07 |
| 1657 | G13B_A | F19B_W | L23B_R | V24B_T | 5.0E-07 | 9.2E-07 | 6.755E-07 | 1.294E-07 |
| 1658 | Y10B_A | L23B_Q | V24B_T | E12B_A | 4.1E-07 | 1.0E-06 | 6.755E-07 | 1.595E-07 |
| 1659 | Y10B_A | I20B_S | S5B_A  | V24B_T | 2.9E-07 | 1.1E-06 | 6.755E-07 | 2.081E-07 |
| 1660 | Y10B_A | I20B_Q | F19B_A | E12B_A | 3.0E-07 | 1.6E-06 | 6.760E-07 | 2.850E-07 |
| 1661 | Y10B_A | I20B_Q | K17B_A | L23B_R | 3.5E-07 | 1.0E-06 | 6.765E-07 | 1.939E-07 |
| 1662 | Y10B_A | G13B_W | I20B_N | L11B_A | 4.1E-07 | 1.1E-06 | 6.765E-07 | 1.609E-07 |
| 1663 | Y10B_A | D6B_A  | I20B_Q | E12B_A | 2.4E-07 | 1.1E-06 | 6.770E-07 | 2.651E-07 |

|      |        |        |        |        |         |         |           |           |
|------|--------|--------|--------|--------|---------|---------|-----------|-----------|
| 1664 | Y10B_A | F19B_Q | K17B_S | V24B_N | 2.5E-07 | 1.3E-06 | 6.770E-07 | 2.758E-07 |
| 1665 | S8B_A  | D6B_A  | I20B_Q | S9B_A  | 3.1E-07 | 1.2E-06 | 6.770E-07 | 2.514E-07 |
| 1666 | G13B_A | I20B_S | G1B_R  | F19B_A | 3.4E-07 | 1.2E-06 | 6.775E-07 | 2.352E-07 |
| 1667 | Y10B_A | I20B_T | T4B_A  | V24B_N | 2.9E-07 | 1.8E-06 | 6.775E-07 | 3.187E-07 |
| 1668 | G13B_A | E18B_T | I20B_T | S5B_A  | 2.5E-07 | 9.9E-07 | 6.775E-07 | 1.941E-07 |
| 1669 | G13B_A | I20B_S | F19B_A | G1B_A  | 4.0E-07 | 1.1E-06 | 6.780E-07 | 1.698E-07 |
| 1670 | S8B_A  | G13B_W | I20B_N | G1B_A  | 2.4E-07 | 1.1E-06 | 6.780E-07 | 2.143E-07 |
| 1671 | Y10B_A | I20B_N | E18B_T | L11B_A | 3.7E-07 | 1.1E-06 | 6.780E-07 | 2.101E-07 |
| 1672 | G13B_A | V7B_A  | L23B_R | V24B_N | 3.3E-07 | 1.2E-06 | 6.785E-07 | 2.385E-07 |
| 1673 | Y10B_A | I20B_Q | E12B_A | G1B_A  | 3.8E-07 | 1.5E-06 | 6.785E-07 | 2.772E-07 |
| 1674 | Y10B_A | F19B_Q | K17B_S | V24B_T | 3.0E-07 | 1.4E-06 | 6.795E-07 | 3.154E-07 |
| 1675 | Y10B_A | E18B_T | L23B_R | V24B_N | 3.0E-07 | 9.8E-07 | 6.805E-07 | 2.300E-07 |
| 1676 | Y10B_A | F19B_Q | L23B_R | V24B_T | 1.6E-07 | 1.3E-06 | 6.810E-07 | 2.870E-07 |
| 1677 | Y10B_A | G13B_W | I20B_Q | G1B_R  | 2.6E-07 | 1.2E-06 | 6.810E-07 | 2.144E-07 |
| 1678 | G13B_A | S8B_A  | E18B_T | I20B_T | 3.6E-07 | 1.1E-06 | 6.810E-07 | 2.101E-07 |
| 1679 | S8B_A  | G13B_W | A16B_N | I20B_N | 1.5E-07 | 1.1E-06 | 6.815E-07 | 2.671E-07 |
| 1680 | G13B_A | I20B_N | K17B_S | Q14B_A | 3.8E-07 | 1.1E-06 | 6.820E-07 | 2.175E-07 |
| 1681 | Y10B_A | I20B_N | K17B_A | L23B_R | 3.1E-07 | 9.8E-07 | 6.820E-07 | 2.311E-07 |
| 1682 | Y10B_A | I20B_T | L23B_Q | Q14B_A | 3.1E-07 | 1.2E-06 | 6.820E-07 | 2.321E-07 |
| 1683 | G13B_A | S8B_A  | I20B_S | K17B_S | 2.0E-07 | 1.3E-06 | 6.820E-07 | 2.546E-07 |
| 1684 | G13B_A | F3B_A  | I20B_Q | G1B_A  | 2.0E-07 | 1.1E-06 | 6.830E-07 | 2.761E-07 |
| 1685 | Y10B_A | I20B_T | T4B_A  | K17B_S | 2.6E-07 | 1.2E-06 | 6.830E-07 | 2.709E-07 |
| 1686 | Y10B_A | S9B_A  | K17B_S | V24B_Q | 2.7E-07 | 1.2E-06 | 6.830E-07 | 2.524E-07 |
| 1687 | S8B_A  | G13B_W | V7B_A  | I20B_Q | 3.9E-07 | 1.1E-06 | 6.830E-07 | 1.890E-07 |
| 1688 | S8B_A  | G13B_W | F19B_Q | L23B_Q | 2.7E-07 | 1.1E-06 | 6.830E-07 | 2.352E-07 |
| 1689 | Y10B_A | A16B_N | I20B_S | F19B_W | 9.9E-08 | 1.5E-06 | 6.834E-07 | 3.677E-07 |
| 1690 | S8B_A  | G13B_W | I20B_Q | G1B_R  | 2.6E-07 | 1.0E-06 | 6.835E-07 | 2.068E-07 |
| 1691 | Y10B_A | E18B_T | L23B_R | V24B_T | 3.6E-07 | 1.3E-06 | 6.835E-07 | 2.278E-07 |
| 1692 | Y10B_A | G13B_W | V7B_A  | I20B_T | 3.5E-07 | 9.5E-07 | 6.835E-07 | 1.631E-07 |
| 1693 | Y10B_A | I20B_T | V24B_T | T2B_A  | 4.2E-07 | 1.2E-06 | 6.840E-07 | 2.099E-07 |
| 1694 | Y10B_A | I20B_N | T4B_A  | L23B_Q | 1.8E-07 | 1.6E-06 | 6.840E-07 | 3.322E-07 |
| 1695 | G13B_A | E18B_T | F19B_W | V24B_Q | 3.7E-07 | 1.2E-06 | 6.850E-07 | 2.578E-07 |
| 1696 | Y10B_A | V7B_A  | I20B_T | S9B_A  | 4.2E-07 | 1.1E-06 | 6.850E-07 | 1.815E-07 |
| 1697 | S8B_A  | G13B_W | F3B_A  | I20B_N | 4.1E-07 | 1.1E-06 | 6.855E-07 | 1.774E-07 |
| 1698 | Y10B_A | F19B_Q | L23B_Q | V24B_T | 2.6E-07 | 1.5E-06 | 6.860E-07 | 2.861E-07 |
| 1699 | G13B_A | E18B_T | L23B_Q | K17B_S | 1.4E-07 | 1.5E-06 | 6.860E-07 | 3.155E-07 |
| 1700 | G13B_A | E18B_T | I20B_S | Q14B_A | 3.7E-07 | 1.0E-06 | 6.865E-07 | 1.936E-07 |
| 1701 | Y10B_A | S8B_A  | I20B_S | F19B_Q | 3.4E-07 | 1.3E-06 | 6.875E-07 | 2.848E-07 |
| 1702 | G13B_A | E18B_T | V24B_Q | E12B_A | 3.4E-07 | 1.1E-06 | 6.880E-07 | 2.055E-07 |
| 1703 | Y10B_A | F19B_Q | L23B_R | V24B_Q | 3.6E-07 | 1.1E-06 | 6.880E-07 | 1.731E-07 |
| 1704 | Y10B_A | I20B_Q | T4B_A  | L23B_Q | 3.1E-07 | 1.4E-06 | 6.885E-07 | 2.711E-07 |
| 1705 | G13B_A | I20B_S | K17B_A | V24B_T | 3.9E-07 | 1.2E-06 | 6.885E-07 | 1.865E-07 |
| 1706 | S8B_A  | G13B_W | I20B_T | L11B_A | 4.8E-07 | 1.1E-06 | 6.885E-07 | 1.492E-07 |
| 1707 | Y10B_A | F19B_Q | S9B_A  | V24B_Q | 2.6E-07 | 1.7E-06 | 6.885E-07 | 3.097E-07 |
| 1708 | G13B_A | A16B_N | L11B_A | I20B_Q | 2.9E-07 | 1.9E-06 | 6.890E-07 | 4.162E-07 |
| 1709 | G13B_A | I20B_T | S5B_A  | E12B_A | 4.5E-07 | 1.0E-06 | 6.895E-07 | 1.387E-07 |
| 1710 | Y10B_A | G13B_W | I20B_Q | E18B_A | 3.0E-07 | 1.5E-06 | 6.895E-07 | 3.010E-07 |
| 1711 | Y10B_A | A16B_N | I20B_Q | F19B_W | 8.9E-08 | 1.2E-06 | 6.895E-07 | 2.793E-07 |
| 1712 | G13B_A | F19B_Q | S9B_A  | K17B_S | 3.8E-07 | 1.7E-06 | 6.900E-07 | 2.911E-07 |
| 1713 | Y10B_A | I20B_N | S9B_A  | F19B_A | 4.0E-07 | 1.2E-06 | 6.900E-07 | 2.250E-07 |
| 1714 | G13B_A | F3B_A  | L23B_R | V24B_N | 3.9E-07 | 1.2E-06 | 6.900E-07 | 2.103E-07 |
| 1715 | G13B_A | V7B_A  | L11B_A | I20B_Q | 3.3E-07 | 1.5E-06 | 6.905E-07 | 2.484E-07 |

|      |        |        |        |        |         |         |           |           |
|------|--------|--------|--------|--------|---------|---------|-----------|-----------|
| 1716 | G13B_A | D6B_A  | I20B_N | F19B_W | 2.7E-07 | 1.1E-06 | 6.905E-07 | 2.107E-07 |
| 1717 | G13B_A | I20B_N | L11B_A | G1B_R  | 3.8E-07 | 1.2E-06 | 6.910E-07 | 1.914E-07 |
| 1718 | S8B_A  | G13B_W | L23B_Q | V24B_N | 2.2E-07 | 1.1E-06 | 6.910E-07 | 2.338E-07 |
| 1719 | G13B_A | I20B_N | S9B_A  | Q14B_A | 4.2E-07 | 1.1E-06 | 6.910E-07 | 2.056E-07 |
| 1720 | Y10B_A | I20B_S | T4B_A  | L23B_Q | 3.3E-07 | 1.4E-06 | 6.915E-07 | 2.722E-07 |
| 1721 | G13B_A | I20B_T | F19B_A | G1B_A  | 4.1E-07 | 1.2E-06 | 6.915E-07 | 2.283E-07 |
| 1722 | Y10B_A | I20B_N | L11B_A | E12B_A | 3.1E-07 | 1.0E-06 | 6.920E-07 | 2.055E-07 |
| 1723 | Y10B_A | D6B_A  | G13B_W | I20B_S | 3.6E-07 | 1.0E-06 | 6.920E-07 | 1.525E-07 |
| 1724 | G13B_A | I20B_Q | E18B_A | G1B_R  | 3.3E-07 | 1.1E-06 | 6.920E-07 | 2.672E-07 |
| 1725 | Y10B_A | E18B_T | F19B_Q | V24B_Q | 3.0E-07 | 1.3E-06 | 6.920E-07 | 2.714E-07 |
| 1726 | G13B_A | F19B_Q | V24B_T | E12B_A | 2.7E-07 | 1.2E-06 | 6.920E-07 | 2.747E-07 |
| 1727 | G13B_A | L23B_Q | F19B_A | V24B_T | 3.8E-07 | 9.8E-07 | 6.920E-07 | 1.497E-07 |
| 1728 | G13B_A | Y10B_A | I20B_T | E12B_A | 3.8E-07 | 1.2E-06 | 6.930E-07 | 2.111E-07 |
| 1729 | S8B_A  | D6B_A  | E18B_T | I20B_T | 3.8E-07 | 1.1E-06 | 6.935E-07 | 2.014E-07 |
| 1730 | S8B_A  | G13B_W | F19B_Q | V24B_T | 4.1E-07 | 1.3E-06 | 6.935E-07 | 2.329E-07 |
| 1731 | G13B_A | L23B_Q | F19B_A | V24B_Q | 2.4E-07 | 1.2E-06 | 6.940E-07 | 2.346E-07 |
| 1732 | G13B_A | I20B_T | S9B_A  | Q14B_A | 3.6E-07 | 9.9E-07 | 6.940E-07 | 1.637E-07 |
| 1733 | Y10B_A | I20B_N | F19B_Q | Q14B_A | 2.6E-07 | 1.2E-06 | 6.940E-07 | 2.984E-07 |
| 1734 | Y10B_A | I20B_Q | S5B_A  | F19B_Q | 2.8E-07 | 2.1E-06 | 6.945E-07 | 4.646E-07 |
| 1735 | S8B_A  | G13B_W | I20B_Q | E18B_A | 3.5E-07 | 1.1E-06 | 6.950E-07 | 2.347E-07 |
| 1736 | Y10B_A | I20B_N | T4B_A  | V24B_T | 3.6E-07 | 1.3E-06 | 6.950E-07 | 2.748E-07 |
| 1737 | S8B_A  | G13B_W | F19B_Q | V24B_N | 3.5E-07 | 1.3E-06 | 6.950E-07 | 2.388E-07 |
| 1738 | Y10B_A | D6B_A  | G13B_W | I20B_T | 3.2E-07 | 1.2E-06 | 6.955E-07 | 2.291E-07 |
| 1739 | G13B_A | F19B_W | S9B_A  | V24B_N | 4.1E-07 | 1.2E-06 | 6.955E-07 | 2.166E-07 |
| 1740 | Y10B_A | F19B_W | L23B_Q | V24B_N | 3.0E-07 | 1.3E-06 | 6.955E-07 | 2.928E-07 |
| 1741 | Y10B_A | A16B_N | I20B_S | E12B_A | 2.7E-07 | 1.1E-06 | 6.960E-07 | 2.502E-07 |
| 1742 | G13B_A | I20B_N | S9B_A  | T2B_A  | 4.2E-07 | 1.1E-06 | 6.960E-07 | 2.026E-07 |
| 1743 | Y10B_A | I20B_N | E18B_T | G1B_A  | 3.8E-07 | 1.1E-06 | 6.960E-07 | 1.944E-07 |
| 1744 | G13B_A | I20B_T | F19B_W | Q14B_A | 4.3E-07 | 9.5E-07 | 6.960E-07 | 1.770E-07 |
| 1745 | Y10B_A | I20B_T | L23B_Q | T2B_A  | 3.7E-07 | 1.0E-06 | 6.960E-07 | 1.858E-07 |
| 1746 | S8B_A  | D6B_A  | G13B_W | I20B_S | 3.0E-07 | 1.1E-06 | 6.965E-07 | 2.295E-07 |
| 1747 | G13B_A | I20B_Q | T2B_A  | E12B_A | 3.3E-07 | 1.1E-06 | 6.965E-07 | 2.334E-07 |
| 1748 | Y10B_A | E18B_T | I20B_S | G1B_A  | 3.1E-07 | 1.1E-06 | 6.965E-07 | 2.374E-07 |
| 1749 | G13B_A | Y10B_A | I20B_N | F19B_W | 2.9E-07 | 1.3E-06 | 6.970E-07 | 2.713E-07 |
| 1750 | Y10B_A | I20B_N | G1B_R  | S9B_A  | 3.9E-07 | 1.2E-06 | 6.970E-07 | 2.136E-07 |
| 1751 | G13B_A | F3B_A  | A16B_N | I20B_Q | 1.4E-07 | 1.6E-06 | 6.970E-07 | 4.147E-07 |
| 1752 | Y10B_A | I20B_T | L11B_A | E12B_A | 3.8E-07 | 1.0E-06 | 6.975E-07 | 1.719E-07 |
| 1753 | S8B_A  | D6B_A  | E18B_T | I20B_S | 2.7E-07 | 1.3E-06 | 6.980E-07 | 3.093E-07 |
| 1754 | G13B_A | I20B_T | K17B_S | Q14B_A | 4.0E-07 | 1.0E-06 | 6.980E-07 | 1.825E-07 |
| 1755 | G13B_A | L11B_A | L23B_R | V24B_N | 2.8E-07 | 1.3E-06 | 6.980E-07 | 2.750E-07 |
| 1756 | Y10B_A | I20B_S | T4B_A  | V24B_T | 4.2E-07 | 1.5E-06 | 6.985E-07 | 2.383E-07 |
| 1757 | G13B_A | Y10B_A | E18B_T | I20B_T | 3.6E-07 | 1.1E-06 | 6.985E-07 | 2.226E-07 |
| 1758 | Y10B_A | I20B_T | E18B_A | K17B_S | 3.4E-07 | 1.1E-06 | 6.990E-07 | 2.155E-07 |
| 1759 | G13B_A | I20B_N | S5B_A  | K17B_S | 3.8E-07 | 1.4E-06 | 6.990E-07 | 2.757E-07 |
| 1760 | Y10B_A | G13B_W | I20B_N | E18B_A | 3.8E-07 | 1.1E-06 | 6.990E-07 | 2.060E-07 |
| 1761 | G13B_A | S8B_A  | I20B_T | F19B_W | 3.0E-07 | 1.3E-06 | 6.995E-07 | 2.556E-07 |
| 1762 | Y10B_A | V7B_A  | I20B_N | E12B_A | 4.4E-07 | 1.1E-06 | 6.995E-07 | 1.803E-07 |
| 1763 | G13B_A | V7B_A  | L23B_Q | V24B_N | 3.2E-07 | 1.4E-06 | 6.995E-07 | 2.585E-07 |
| 1764 | Y10B_A | I20B_S | S5B_A  | F19B_Q | 2.6E-07 | 1.1E-06 | 6.995E-07 | 2.528E-07 |
| 1765 | Y10B_A | I20B_N | S9B_A  | G1B_A  | 4.2E-07 | 1.1E-06 | 7.000E-07 | 1.965E-07 |
| 1766 | Y10B_A | V7B_A  | I20B_Q | F19B_W | 3.9E-07 | 1.3E-06 | 7.000E-07 | 2.942E-07 |
| 1767 | G13B_A | L11B_A | I20B_S | E12B_A | 4.0E-07 | 1.7E-06 | 7.000E-07 | 2.962E-07 |

|      |        |        |        |        |         |         |           |           |
|------|--------|--------|--------|--------|---------|---------|-----------|-----------|
| 1768 | Y10B_A | I20B_Q | K17B_S | G1B_A  | 1.9E-07 | 1.2E-06 | 7.000E-07 | 2.487E-07 |
| 1769 | G13B_A | F3B_A  | L23B_Q | V24B_N | 4.2E-07 | 1.3E-06 | 7.000E-07 | 2.530E-07 |
| 1770 | G13B_A | L23B_R | V24B_N | G1B_A  | 3.9E-07 | 1.5E-06 | 7.000E-07 | 2.498E-07 |
| 1771 | Y10B_A | G13B_W | F3B_A  | I20B_Q | 2.8E-07 | 1.5E-06 | 7.005E-07 | 3.124E-07 |
| 1772 | G13B_A | I20B_Q | F19B_W | T4B_A  | 3.3E-07 | 1.3E-06 | 7.010E-07 | 2.590E-07 |
| 1773 | Y10B_A | S8B_A  | I20B_S | V24B_T | 3.4E-07 | 1.4E-06 | 7.010E-07 | 2.604E-07 |
| 1774 | G13B_A | I20B_S | S5B_A  | S9B_A  | 3.6E-07 | 1.9E-06 | 7.015E-07 | 3.213E-07 |
| 1775 | Y10B_A | I20B_T | L23B_R | T2B_A  | 3.8E-07 | 1.4E-06 | 7.020E-07 | 2.546E-07 |
| 1776 | G13B_A | L11B_A | L23B_Q | V24B_Q | 3.1E-07 | 1.1E-06 | 7.020E-07 | 2.577E-07 |
| 1777 | Y10B_A | I20B_S | T4B_A  | V24B_N | 3.1E-07 | 1.2E-06 | 7.020E-07 | 2.236E-07 |
| 1778 | Y10B_A | S8B_A  | I20B_N | F19B_Q | 2.9E-07 | 1.4E-06 | 7.025E-07 | 2.890E-07 |
| 1779 | Y10B_A | S9B_A  | L23B_Q | K17B_S | 3.3E-07 | 1.3E-06 | 7.030E-07 | 2.530E-07 |
| 1780 | Y10B_A | I20B_Q | L23B_Q | T2B_A  | 2.2E-07 | 1.0E-06 | 7.030E-07 | 2.242E-07 |
| 1781 | G13B_A | Y10B_A | I20B_S | S9B_A  | 4.9E-07 | 1.7E-06 | 7.035E-07 | 2.697E-07 |
| 1782 | Y10B_A | I20B_T | F19B_Q | T2B_A  | 2.2E-07 | 1.2E-06 | 7.035E-07 | 2.798E-07 |
| 1783 | G13B_A | I20B_S | E18B_A | E12B_A | 4.3E-07 | 1.0E-06 | 7.040E-07 | 1.641E-07 |
| 1784 | G13B_A | G1B_R  | F19B_Q | V24B_Q | 2.4E-07 | 1.4E-06 | 7.045E-07 | 3.190E-07 |
| 1785 | Y10B_A | I20B_Q | S5B_A  | K17B_S | 3.1E-07 | 1.4E-06 | 7.045E-07 | 3.099E-07 |
| 1786 | G13B_A | F3B_A  | L23B_Q | V24B_T | 3.6E-07 | 1.3E-06 | 7.050E-07 | 2.354E-07 |
| 1787 | S8B_A  | V7B_A  | E18B_T | I20B_S | 3.3E-07 | 1.1E-06 | 7.050E-07 | 3.221E-07 |
| 1788 | S8B_A  | G13B_W | I20B_T | E18B_A | 4.4E-07 | 9.8E-07 | 7.050E-07 | 1.683E-07 |
| 1789 | Y10B_A | L11B_A | I20B_S | E12B_A | 3.8E-07 | 1.1E-06 | 7.055E-07 | 2.250E-07 |
| 1790 | Y10B_A | I20B_T | L23B_R | Q14B_A | 3.3E-07 | 1.2E-06 | 7.055E-07 | 2.485E-07 |
| 1791 | Y10B_A | I20B_T | G1B_R  | F19B_W | 3.1E-07 | 1.2E-06 | 7.060E-07 | 3.059E-07 |
| 1792 | Y10B_A | A16B_N | I20B_S | K17B_S | 2.4E-07 | 1.2E-06 | 7.060E-07 | 3.041E-07 |
| 1793 | G13B_A | Y10B_A | I20B_S | E12B_A | 3.7E-07 | 1.0E-06 | 7.060E-07 | 1.524E-07 |
| 1794 | G13B_A | S8B_A  | I20B_T | E12B_A | 3.1E-07 | 1.2E-06 | 7.060E-07 | 2.057E-07 |
| 1795 | Y10B_A | D6B_A  | I20B_N | E18B_T | 2.7E-07 | 1.1E-06 | 7.065E-07 | 2.063E-07 |
| 1796 | G13B_A | G1B_R  | K17B_S | V24B_N | 2.4E-07 | 1.1E-06 | 7.065E-07 | 2.553E-07 |
| 1797 | G13B_A | S8B_A  | I20B_N | E12B_A | 4.5E-07 | 1.4E-06 | 7.070E-07 | 2.412E-07 |
| 1798 | G13B_A | K17B_S | V24B_T | E12B_A | 4.3E-07 | 9.4E-07 | 7.070E-07 | 1.681E-07 |
| 1799 | G13B_A | Y10B_A | I20B_T | S9B_A  | 3.6E-07 | 9.8E-07 | 7.070E-07 | 2.053E-07 |
| 1800 | Y10B_A | F19B_Q | V24B_Q | E12B_A | 4.0E-07 | 1.2E-06 | 7.075E-07 | 2.371E-07 |
| 1801 | S8B_A  | G13B_W | F3B_A  | I20B_S | 3.6E-07 | 1.3E-06 | 7.080E-07 | 2.418E-07 |
| 1802 | Y10B_A | D6B_A  | I20B_S | S9B_A  | 3.3E-07 | 1.4E-06 | 7.085E-07 | 2.988E-07 |
| 1803 | Y10B_A | I20B_N | E18B_A | K17B_S | 3.5E-07 | 1.1E-06 | 7.085E-07 | 2.209E-07 |
| 1804 | G13B_A | V7B_A  | F19B_Q | V24B_Q | 3.0E-07 | 1.3E-06 | 7.085E-07 | 2.269E-07 |
| 1805 | Y10B_A | L11B_A | I20B_Q | F19B_A | 3.7E-07 | 1.0E-06 | 7.085E-07 | 1.797E-07 |
| 1806 | G13B_A | I20B_S | K17B_S | T2B_A  | 2.8E-07 | 1.3E-06 | 7.100E-07 | 2.912E-07 |
| 1807 | G13B_A | F19B_W | E12B_A | V24B_N | 2.7E-07 | 1.1E-06 | 7.100E-07 | 2.547E-07 |
| 1808 | G13B_A | F3B_A  | L23B_Q | V24B_Q | 4.0E-07 | 1.1E-06 | 7.100E-07 | 1.933E-07 |
| 1809 | G13B_A | I20B_Q | Q14B_A | E12B_A | 3.8E-07 | 1.5E-06 | 7.105E-07 | 2.527E-07 |
| 1810 | Y10B_A | L23B_R | K17B_S | V24B_T | 3.8E-07 | 1.3E-06 | 7.110E-07 | 2.370E-07 |
| 1811 | G13B_A | E18B_T | I20B_T | T4B_A  | 4.9E-07 | 1.5E-06 | 7.110E-07 | 2.233E-07 |
| 1812 | G13B_A | L23B_Q | F19B_A | V24B_N | 3.3E-07 | 1.4E-06 | 7.115E-07 | 2.859E-07 |
| 1813 | Y10B_A | F3B_A  | I20B_N | E18B_T | 3.6E-07 | 1.2E-06 | 7.115E-07 | 2.158E-07 |
| 1814 | G13B_A | I20B_T | Q14B_A | E12B_A | 3.8E-07 | 1.1E-06 | 7.120E-07 | 1.948E-07 |
| 1815 | G13B_A | F19B_Q | K17B_S | E12B_A | 2.4E-07 | 1.3E-06 | 7.130E-07 | 3.309E-07 |
| 1816 | Y10B_A | I20B_Q | F19B_Q | Q14B_A | 4.0E-07 | 1.2E-06 | 7.130E-07 | 2.465E-07 |
| 1817 | G13B_A | I20B_N | S5B_A  | S9B_A  | 4.9E-07 | 1.1E-06 | 7.135E-07 | 1.559E-07 |
| 1818 | Y10B_A | I20B_S | F19B_A | E12B_A | 3.9E-07 | 1.2E-06 | 7.140E-07 | 2.173E-07 |
| 1819 | S8B_A  | G13B_W | I20B_S | G1B_R  | 3.8E-07 | 1.2E-06 | 7.140E-07 | 1.944E-07 |

|      |        |        |        |        |         |         |           |           |
|------|--------|--------|--------|--------|---------|---------|-----------|-----------|
| 1820 | G13B_A | D6B_A  | L23B_Q | V24B_T | 4.2E-07 | 1.2E-06 | 7.140E-07 | 1.892E-07 |
| 1821 | Y10B_A | F19B_W | L23B_Q | V24B_Q | 3.0E-07 | 1.5E-06 | 7.140E-07 | 2.801E-07 |
| 1822 | S8B_A  | G13B_W | I20B_T | G1B_A  | 4.8E-07 | 1.3E-06 | 7.145E-07 | 2.134E-07 |
| 1823 | G13B_A | I20B_T | E18B_A | G1B_R  | 4.4E-07 | 1.1E-06 | 7.145E-07 | 1.527E-07 |
| 1824 | S8B_A  | G13B_W | L11B_A | I20B_S | 4.3E-07 | 1.4E-06 | 7.145E-07 | 2.268E-07 |
| 1825 | G13B_A | I20B_N | E18B_T | S5B_A  | 2.6E-07 | 1.2E-06 | 7.145E-07 | 2.381E-07 |
| 1826 | G13B_A | E18B_T | I20B_T | K17B_A | 3.6E-07 | 9.4E-07 | 7.150E-07 | 1.588E-07 |
| 1827 | G13B_A | A16B_N | I20B_N | F19B_A | 2.8E-07 | 1.2E-06 | 7.155E-07 | 2.953E-07 |
| 1828 | Y10B_A | I20B_Q | E18B_A | K17B_S | 3.5E-07 | 1.3E-06 | 7.155E-07 | 2.447E-07 |
| 1829 | Y10B_A | G13B_W | L23B_R | V24B_Q | 4.0E-07 | 1.8E-06 | 7.155E-07 | 3.399E-07 |
| 1830 | Y10B_A | I20B_S | G1B_R  | F19B_W | 3.1E-07 | 1.6E-06 | 7.160E-07 | 2.850E-07 |
| 1831 | G13B_A | D6B_A  | L23B_Q | V24B_Q | 3.8E-07 | 1.1E-06 | 7.160E-07 | 1.775E-07 |
| 1832 | G13B_A | F19B_W | L23B_Q | K17B_S | 2.5E-07 | 1.4E-06 | 7.160E-07 | 2.815E-07 |
| 1833 | G13B_A | S8B_A  | I20B_T | S9B_A  | 4.7E-07 | 1.1E-06 | 7.170E-07 | 1.749E-07 |
| 1834 | G13B_A | V7B_A  | F19B_Q | V24B_N | 2.5E-07 | 1.7E-06 | 7.170E-07 | 2.946E-07 |
| 1835 | G13B_A | E18B_T | I20B_Q | Q14B_A | 3.4E-07 | 1.3E-06 | 7.170E-07 | 2.975E-07 |
| 1836 | G13B_A | L11B_A | L23B_R | V24B_T | 4.6E-07 | 1.2E-06 | 7.175E-07 | 2.250E-07 |
| 1837 | G13B_A | S8B_A  | E18B_T | I20B_S | 3.6E-07 | 1.2E-06 | 7.180E-07 | 2.159E-07 |
| 1838 | Y10B_A | I20B_N | L11B_A | K17B_S | 4.0E-07 | 1.0E-06 | 7.190E-07 | 1.782E-07 |
| 1839 | Y10B_A | I20B_T | E18B_A | F19B_W | 3.6E-07 | 1.0E-06 | 7.190E-07 | 2.105E-07 |
| 1840 | G13B_A | L23B_Q | V24B_Q | G1B_A  | 3.7E-07 | 1.4E-06 | 7.200E-07 | 2.961E-07 |
| 1841 | G13B_A | L23B_Q | K17B_S | E12B_A | 2.1E-07 | 1.2E-06 | 7.205E-07 | 2.745E-07 |
| 1842 | Y10B_A | A16B_N | I20B_N | E12B_A | 1.9E-07 | 1.5E-06 | 7.210E-07 | 3.561E-07 |
| 1843 | S8B_A  | V7B_A  | I20B_N | S9B_A  | 4.4E-07 | 1.1E-06 | 7.212E-07 | 1.778E-07 |
| 1844 | Y10B_A | A16B_N | I20B_T | F19B_W | 2.3E-07 | 1.7E-06 | 7.225E-07 | 3.395E-07 |
| 1845 | G13B_A | I20B_S | S9B_A  | Q14B_A | 4.2E-07 | 1.3E-06 | 7.225E-07 | 2.741E-07 |
| 1846 | G13B_A | I20B_Q | E18B_A | F19B_A | 4.4E-07 | 1.3E-06 | 7.225E-07 | 2.449E-07 |
| 1847 | S8B_A  | G13B_W | V7B_A  | I20B_S | 3.0E-07 | 1.1E-06 | 7.225E-07 | 2.114E-07 |
| 1848 | G13B_A | V7B_A  | I20B_Q | G1B_A  | 3.5E-07 | 1.5E-06 | 7.230E-07 | 2.789E-07 |
| 1849 | G13B_A | F19B_Q | L23B_R | E12B_A | 4.0E-07 | 1.1E-06 | 7.230E-07 | 2.467E-07 |
| 1850 | Y10B_A | I20B_T | F19B_A | E12B_A | 3.7E-07 | 1.2E-06 | 7.235E-07 | 2.067E-07 |
| 1851 | Y10B_A | I20B_S | L23B_Q | T2B_A  | 2.5E-07 | 1.6E-06 | 7.235E-07 | 3.360E-07 |
| 1852 | S8B_A  | G13B_W | V7B_A  | I20B_T | 4.5E-07 | 1.1E-06 | 7.240E-07 | 1.941E-07 |
| 1853 | Y10B_A | G13B_W | L11B_A | I20B_S | 2.4E-07 | 1.2E-06 | 7.245E-07 | 2.250E-07 |
| 1854 | G13B_A | I20B_Q | K17B_A | S9B_A  | 3.8E-07 | 1.5E-06 | 7.245E-07 | 2.941E-07 |
| 1855 | Y10B_A | G13B_W | I20B_Q | S5B_A  | 3.0E-07 | 1.2E-06 | 7.250E-07 | 2.590E-07 |
| 1856 | Y10B_A | G13B_W | K17B_S | V24B_N | 4.2E-07 | 1.3E-06 | 7.250E-07 | 2.438E-07 |
| 1857 | Y10B_A | D6B_A  | G13B_W | I20B_N | 3.7E-07 | 1.1E-06 | 7.255E-07 | 2.202E-07 |
| 1858 | G13B_A | I20B_N | L11B_A | G1B_A  | 4.8E-07 | 1.5E-06 | 7.255E-07 | 2.426E-07 |
| 1859 | Y10B_A | I20B_S | S9B_A  | G1B_A  | 4.9E-07 | 1.1E-06 | 7.255E-07 | 1.669E-07 |
| 1860 | S8B_A  | G13B_W | I20B_N | L11B_A | 4.1E-07 | 1.6E-06 | 7.260E-07 | 2.808E-07 |
| 1861 | G13B_A | L11B_A | L23B_R | V24B_Q | 3.3E-07 | 1.2E-06 | 7.265E-07 | 2.359E-07 |
| 1862 | S8B_A  | G13B_W | F3B_A  | I20B_T | 4.8E-07 | 9.6E-07 | 7.270E-07 | 1.204E-07 |
| 1863 | Y10B_A | I20B_S | E12B_A | G1B_A  | 4.3E-07 | 1.2E-06 | 7.275E-07 | 2.463E-07 |
| 1864 | G13B_A | F3B_A  | I20B_S | F19B_A | 3.8E-07 | 1.4E-06 | 7.275E-07 | 2.389E-07 |
| 1865 | G13B_A | D6B_A  | I20B_Q | E18B_A | 3.8E-07 | 1.1E-06 | 7.275E-07 | 2.159E-07 |
| 1866 | G13B_A | V7B_A  | I20B_S | G1B_R  | 5.3E-07 | 1.0E-06 | 7.285E-07 | 1.532E-07 |
| 1867 | S8B_A  | G13B_W | I20B_N | F19B_A | 3.7E-07 | 1.2E-06 | 7.285E-07 | 2.424E-07 |
| 1868 | Y10B_A | V7B_A  | I20B_S | S9B_A  | 4.4E-07 | 1.1E-06 | 7.290E-07 | 1.888E-07 |
| 1869 | Y10B_A | G13B_W | F19B_Q | V24B_N | 3.7E-07 | 1.4E-06 | 7.290E-07 | 2.952E-07 |
| 1870 | G13B_A | I20B_T | T2B_A  | E12B_A | 4.5E-07 | 1.2E-06 | 7.300E-07 | 1.791E-07 |
| 1871 | G13B_A | Y10B_A | I20B_N | S9B_A  | 4.2E-07 | 1.3E-06 | 7.300E-07 | 2.348E-07 |

|      |        |        |        |        |         |         |           |           |
|------|--------|--------|--------|--------|---------|---------|-----------|-----------|
| 1872 | Y10B_A | G13B_W | F3B_A  | I20B_N | 4.4E-07 | 1.1E-06 | 7.305E-07 | 1.750E-07 |
| 1873 | G13B_A | E18B_A | L23B_R | V24B_N | 3.6E-07 | 9.4E-07 | 7.305E-07 | 1.553E-07 |
| 1874 | G13B_A | V7B_A  | L23B_Q | V24B_T | 4.0E-07 | 1.5E-06 | 7.310E-07 | 2.833E-07 |
| 1875 | G13B_A | I20B_N | K17B_A | F19B_Q | 2.4E-07 | 1.2E-06 | 7.315E-07 | 2.709E-07 |
| 1876 | G13B_A | I20B_T | K17B_A | F19B_Q | 1.6E-07 | 1.3E-06 | 7.315E-07 | 3.238E-07 |
| 1877 | G13B_A | E18B_T | V24B_T | E12B_A | 3.5E-07 | 1.2E-06 | 7.315E-07 | 2.544E-07 |
| 1878 | G13B_A | V7B_A  | F3B_A  | I20B_Q | 2.8E-07 | 1.3E-06 | 7.315E-07 | 3.033E-07 |
| 1879 | G13B_A | Y10B_A | I20B_T | F19B_W | 4.1E-07 | 1.5E-06 | 7.325E-07 | 2.658E-07 |
| 1880 | G13B_A | I20B_T | T4B_A  | E12B_A | 3.8E-07 | 1.2E-06 | 7.325E-07 | 2.164E-07 |
| 1881 | Y10B_A | S9B_A  | L23B_R | V24B_Q | 2.1E-07 | 1.6E-06 | 7.325E-07 | 3.392E-07 |
| 1882 | G13B_A | V7B_A  | F3B_A  | I20B_N | 3.7E-07 | 1.2E-06 | 7.325E-07 | 2.053E-07 |
| 1883 | G13B_A | A16B_N | F19B_Q | V24B_N | 2.1E-07 | 1.6E-06 | 7.325E-07 | 4.142E-07 |
| 1884 | Y10B_A | I20B_N | L11B_A | F19B_W | 3.3E-07 | 1.4E-06 | 7.330E-07 | 2.611E-07 |
| 1885 | Y10B_A | S9B_A  | K17B_S | V24B_N | 3.8E-07 | 1.2E-06 | 7.335E-07 | 2.600E-07 |
| 1886 | G13B_A | F19B_Q | L23B_R | K17B_S | 2.5E-07 | 1.4E-06 | 7.340E-07 | 2.829E-07 |
| 1887 | G13B_A | I20B_S | F19B_W | T4B_A  | 3.3E-07 | 1.2E-06 | 7.340E-07 | 2.168E-07 |
| 1888 | Y10B_A | S9B_A  | L23B_Q | V24B_Q | 4.0E-07 | 1.2E-06 | 7.340E-07 | 2.339E-07 |
| 1889 | G13B_A | I20B_T | S5B_A  | S9B_A  | 5.8E-07 | 9.8E-07 | 7.345E-07 | 1.437E-07 |
| 1890 | G13B_A | V7B_A  | I20B_S | F19B_A | 4.7E-07 | 1.2E-06 | 7.345E-07 | 1.798E-07 |
| 1891 | G13B_A | S8B_A  | I20B_N | S9B_A  | 3.0E-07 | 1.3E-06 | 7.350E-07 | 2.510E-07 |
| 1892 | Y10B_A | G13B_W | F19B_Q | V24B_T | 3.1E-07 | 1.3E-06 | 7.360E-07 | 2.816E-07 |
| 1893 | G13B_A | D6B_A  | L23B_R | V24B_Q | 4.0E-07 | 1.1E-06 | 7.360E-07 | 2.074E-07 |
| 1894 | Y10B_A | I20B_S | S5B_A  | L23B_Q | 2.5E-07 | 1.6E-06 | 7.360E-07 | 3.145E-07 |
| 1895 | G13B_A | A16B_N | L23B_R | V24B_T | 1.2E-07 | 1.1E-06 | 7.360E-07 | 2.777E-07 |
| 1896 | G13B_A | L11B_A | I20B_S | G1B_A  | 4.1E-07 | 1.1E-06 | 7.360E-07 | 1.881E-07 |
| 1897 | S8B_A  | D6B_A  | E18B_T | I20B_Q | 2.8E-07 | 1.2E-06 | 7.365E-07 | 2.399E-07 |
| 1898 | S8B_A  | V7B_A  | I20B_N | E18B_T | 3.9E-07 | 1.3E-06 | 7.375E-07 | 2.408E-07 |
| 1899 | G13B_A | I20B_N | G1B_R  | F19B_A | 3.4E-07 | 1.4E-06 | 7.385E-07 | 2.677E-07 |
| 1900 | Y10B_A | G13B_W | L23B_R | V24B_T | 4.1E-07 | 1.0E-06 | 7.385E-07 | 2.046E-07 |
| 1901 | G13B_A | V7B_A  | I20B_T | F19B_A | 3.6E-07 | 1.5E-06 | 7.385E-07 | 2.740E-07 |
| 1902 | G13B_A | I20B_N | L11B_A | F19B_A | 4.7E-07 | 1.4E-06 | 7.390E-07 | 2.478E-07 |
| 1903 | G13B_A | D6B_A  | L11B_A | I20B_Q | 3.2E-07 | 1.2E-06 | 7.395E-07 | 2.339E-07 |
| 1904 | G13B_A | D6B_A  | L23B_Q | V24B_N | 2.4E-07 | 1.1E-06 | 7.395E-07 | 2.741E-07 |
| 1905 | G13B_A | Y10B_A | I20B_S | F19B_W | 3.3E-07 | 1.3E-06 | 7.395E-07 | 2.082E-07 |
| 1906 | Y10B_A | G13B_W | A16B_N | I20B_T | 2.1E-07 | 1.3E-06 | 7.400E-07 | 3.345E-07 |
| 1907 | G13B_A | D6B_A  | I20B_S | F19B_A | 3.2E-07 | 1.3E-06 | 7.400E-07 | 2.457E-07 |
| 1908 | G13B_A | E18B_T | I20B_T | Q14B_A | 4.2E-07 | 1.1E-06 | 7.405E-07 | 1.863E-07 |
| 1909 | Y10B_A | E18B_T | K17B_S | V24B_N | 3.4E-07 | 2.3E-06 | 7.405E-07 | 4.189E-07 |
| 1910 | Y10B_A | I20B_N | K17B_S | G1B_A  | 3.8E-07 | 1.2E-06 | 7.405E-07 | 2.177E-07 |
| 1911 | G13B_A | V7B_A  | I20B_T | G1B_R  | 4.3E-07 | 1.2E-06 | 7.405E-07 | 2.011E-07 |
| 1912 | Y10B_A | G13B_W | V7B_A  | I20B_N | 3.5E-07 | 1.2E-06 | 7.410E-07 | 1.750E-07 |
| 1913 | G13B_A | E18B_A | L23B_R | V24B_Q | 3.0E-07 | 1.1E-06 | 7.415E-07 | 2.417E-07 |
| 1914 | Y10B_A | D6B_A  | I20B_S | K17B_S | 4.1E-07 | 1.7E-06 | 7.420E-07 | 2.924E-07 |
| 1915 | G13B_A | L23B_R | V24B_T | G1B_A  | 4.1E-07 | 1.2E-06 | 7.420E-07 | 1.779E-07 |
| 1916 | Y10B_A | G13B_W | K17B_S | V24B_Q | 4.4E-07 | 1.1E-06 | 7.420E-07 | 1.829E-07 |
| 1917 | G13B_A | L23B_Q | V24B_T | G1B_A  | 3.6E-07 | 1.3E-06 | 7.420E-07 | 3.021E-07 |
| 1918 | G13B_A | I20B_S | K17B_A | F19B_Q | 2.5E-07 | 1.5E-06 | 7.425E-07 | 2.941E-07 |
| 1919 | G13B_A | I20B_N | F19B_W | T2B_A  | 2.0E-07 | 1.5E-06 | 7.425E-07 | 3.151E-07 |
| 1920 | Y10B_A | I20B_N | L11B_A | S9B_A  | 4.2E-07 | 1.2E-06 | 7.435E-07 | 2.139E-07 |
| 1921 | Y10B_A | G13B_W | F19B_Q | L23B_Q | 2.6E-07 | 1.3E-06 | 7.435E-07 | 2.752E-07 |
| 1922 | Y10B_A | G13B_W | I20B_T | G1B_A  | 4.8E-07 | 1.3E-06 | 7.440E-07 | 1.929E-07 |
| 1923 | G13B_A | I20B_T | G1B_R  | F19B_A | 3.9E-07 | 1.2E-06 | 7.440E-07 | 2.109E-07 |

|      |        |        |        |        |         |         |           |           |
|------|--------|--------|--------|--------|---------|---------|-----------|-----------|
| 1924 | Y10B_A | D6B_A  | I20B_N | S9B_A  | 4.5E-07 | 1.4E-06 | 7.445E-07 | 2.238E-07 |
| 1925 | G13B_A | F3B_A  | I20B_T | G1B_R  | 3.1E-07 | 1.2E-06 | 7.450E-07 | 2.125E-07 |
| 1926 | G13B_A | F19B_Q | V24B_Q | G1B_A  | 2.1E-07 | 1.5E-06 | 7.450E-07 | 3.000E-07 |
| 1927 | Y10B_A | S8B_A  | I20B_T | F19B_Q | 3.2E-07 | 1.3E-06 | 7.450E-07 | 2.493E-07 |
| 1928 | G13B_A | I20B_S | Q14B_A | E12B_A | 4.5E-07 | 1.2E-06 | 7.450E-07 | 2.285E-07 |
| 1929 | G13B_A | I20B_N | S5B_A  | E12B_A | 4.5E-07 | 1.4E-06 | 7.450E-07 | 2.269E-07 |
| 1930 | Y10B_A | L23B_R | V24B_T | E12B_A | 5.3E-07 | 1.6E-06 | 7.450E-07 | 2.565E-07 |
| 1931 | G13B_A | G1B_R  | L23B_R | V24B_Q | 3.6E-07 | 1.7E-06 | 7.460E-07 | 2.774E-07 |
| 1932 | S8B_A  | D6B_A  | I20B_N | F19B_W | 1.8E-07 | 1.4E-06 | 7.470E-07 | 3.408E-07 |
| 1933 | S8B_A  | G13B_W | I20B_S | G1B_A  | 4.1E-07 | 1.1E-06 | 7.470E-07 | 2.164E-07 |
| 1934 | Y10B_A | F19B_W | L23B_R | V24B_Q | 2.9E-07 | 1.2E-06 | 7.470E-07 | 2.610E-07 |
| 1935 | G13B_A | I20B_N | F19B_W | T4B_A  | 4.5E-07 | 1.3E-06 | 7.475E-07 | 2.093E-07 |
| 1936 | Y10B_A | G13B_W | I20B_T | E18B_A | 5.2E-07 | 1.1E-06 | 7.480E-07 | 1.695E-07 |
| 1937 | G13B_A | D6B_A  | V7B_A  | I20B_Q | 4.4E-07 | 1.5E-06 | 7.480E-07 | 2.628E-07 |
| 1938 | G13B_A | S9B_A  | L23B_Q | E12B_A | 4.0E-07 | 1.2E-06 | 7.485E-07 | 2.120E-07 |
| 1939 | G13B_A | V7B_A  | I20B_N | G1B_R  | 3.3E-07 | 1.4E-06 | 7.490E-07 | 2.907E-07 |
| 1940 | G13B_A | F3B_A  | L23B_R | V24B_Q | 4.8E-07 | 1.1E-06 | 7.490E-07 | 1.811E-07 |
| 1941 | Y10B_A | G13B_W | I20B_S | G1B_A  | 4.8E-07 | 1.1E-06 | 7.490E-07 | 1.807E-07 |
| 1942 | Y10B_A | I20B_T | S5B_A  | F19B_Q | 2.1E-07 | 1.2E-06 | 7.495E-07 | 2.608E-07 |
| 1943 | G13B_A | S9B_A  | V24B_T | E12B_A | 4.2E-07 | 1.1E-06 | 7.500E-07 | 1.962E-07 |
| 1944 | G13B_A | L23B_R | F19B_A | V24B_Q | 3.9E-07 | 1.3E-06 | 7.500E-07 | 2.294E-07 |
| 1945 | Y10B_A | V7B_A  | I20B_S | F19B_W | 3.3E-07 | 1.2E-06 | 7.500E-07 | 2.444E-07 |
| 1946 | G13B_A | F19B_W | S9B_A  | V24B_T | 4.3E-07 | 1.7E-06 | 7.500E-07 | 3.051E-07 |
| 1947 | G13B_A | L23B_R | F19B_A | V24B_N | 4.6E-07 | 1.7E-06 | 7.510E-07 | 2.651E-07 |
| 1948 | S8B_A  | D6B_A  | I20B_T | S9B_A  | 4.7E-07 | 1.4E-06 | 7.515E-07 | 2.079E-07 |
| 1949 | G13B_A | S8B_A  | I20B_S | E12B_A | 3.9E-07 | 1.4E-06 | 7.515E-07 | 2.521E-07 |
| 1950 | G13B_A | I20B_N | E18B_T | T4B_A  | 4.2E-07 | 1.2E-06 | 7.520E-07 | 2.187E-07 |
| 1951 | Y10B_A | V7B_A  | I20B_Q | E12B_A | 3.5E-07 | 1.5E-06 | 7.520E-07 | 2.882E-07 |
| 1952 | S8B_A  | D6B_A  | I20B_Q | E12B_A | 4.6E-07 | 1.3E-06 | 7.520E-07 | 1.967E-07 |
| 1953 | G13B_A | I20B_N | T2B_A  | E12B_A | 4.5E-07 | 1.2E-06 | 7.520E-07 | 2.197E-07 |
| 1954 | Y10B_A | F19B_W | L23B_Q | K17B_S | 4.0E-07 | 1.3E-06 | 7.540E-07 | 2.550E-07 |
| 1955 | S8B_A  | G13B_W | V7B_A  | I20B_N | 3.9E-07 | 1.5E-06 | 7.540E-07 | 2.564E-07 |
| 1956 | G13B_A | A16B_N | L23B_R | V24B_Q | 2.0E-07 | 1.5E-06 | 7.545E-07 | 3.702E-07 |
| 1957 | S8B_A  | D6B_A  | I20B_Q | K17B_S | 2.8E-07 | 1.3E-06 | 7.550E-07 | 2.780E-07 |
| 1958 | Y10B_A | F19B_Q | S9B_A  | L23B_Q | 3.2E-07 | 1.2E-06 | 7.555E-07 | 2.047E-07 |
| 1959 | G13B_A | I20B_N | T4B_A  | S9B_A  | 4.2E-07 | 1.4E-06 | 7.555E-07 | 2.074E-07 |
| 1960 | S8B_A  | G13B_W | K17B_S | V24B_Q | 3.7E-07 | 1.3E-06 | 7.555E-07 | 2.828E-07 |
| 1961 | G13B_A | F19B_Q | S9B_A  | L23B_R | 3.5E-07 | 1.5E-06 | 7.560E-07 | 2.502E-07 |
| 1962 | Y10B_A | D6B_A  | E18B_T | I20B_S | 3.8E-07 | 1.4E-06 | 7.565E-07 | 2.510E-07 |
| 1963 | G13B_A | E18B_T | S9B_A  | L23B_R | 3.4E-07 | 1.4E-06 | 7.565E-07 | 2.466E-07 |
| 1964 | S8B_A  | G13B_W | I20B_S | E18B_A | 5.2E-07 | 1.0E-06 | 7.570E-07 | 1.429E-07 |
| 1965 | G13B_A | E18B_T | F19B_W | V24B_T | 4.1E-07 | 1.6E-06 | 7.570E-07 | 3.491E-07 |
| 1966 | Y10B_A | I20B_S | K17B_A | V24B_N | 4.0E-07 | 1.1E-06 | 7.570E-07 | 2.050E-07 |
| 1967 | Y10B_A | L11B_A | I20B_S | S9B_A  | 4.9E-07 | 1.3E-06 | 7.575E-07 | 2.250E-07 |
| 1968 | G13B_A | I20B_N | F19B_A | G1B_A  | 4.0E-07 | 1.5E-06 | 7.575E-07 | 2.816E-07 |
| 1969 | S8B_A  | D6B_A  | I20B_N | S9B_A  | 4.0E-07 | 1.0E-06 | 7.580E-07 | 1.880E-07 |
| 1970 | Y10B_A | E18B_T | I20B_Q | T4B_A  | 3.8E-07 | 1.5E-06 | 7.585E-07 | 3.084E-07 |
| 1971 | Y10B_A | I20B_T | K17B_A | F19B_Q | 3.2E-07 | 1.4E-06 | 7.590E-07 | 3.568E-07 |
| 1972 | G13B_A | L11B_A | I20B_Q | G1B_A  | 2.7E-07 | 1.2E-06 | 7.590E-07 | 2.881E-07 |
| 1973 | G13B_A | Y10B_A | E18B_T | I20B_S | 3.9E-07 | 1.2E-06 | 7.595E-07 | 2.304E-07 |
| 1974 | Y10B_A | I20B_T | S9B_A  | G1B_A  | 5.0E-07 | 1.3E-06 | 7.595E-07 | 1.849E-07 |
| 1975 | G13B_A | I20B_N | S5B_A  | F19B_W | 4.5E-07 | 1.2E-06 | 7.600E-07 | 2.467E-07 |

|      |        |        |        |        |         |         |           |           |
|------|--------|--------|--------|--------|---------|---------|-----------|-----------|
| 1976 | Y10B_A | I20B_Q | E18B_A | E12B_A | 4.6E-07 | 1.5E-06 | 7.605E-07 | 2.687E-07 |
| 1977 | G13B_A | I20B_N | F19B_W | Q14B_A | 5.3E-07 | 1.1E-06 | 7.610E-07 | 1.898E-07 |
| 1978 | Y10B_A | F19B_W | L23B_R | V24B_N | 2.7E-07 | 1.5E-06 | 7.610E-07 | 3.155E-07 |
| 1979 | G13B_A | I20B_T | L11B_A | F19B_A | 4.6E-07 | 1.1E-06 | 7.615E-07 | 2.266E-07 |
| 1980 | Y10B_A | I20B_T | E12B_A | G1B_A  | 5.3E-07 | 1.4E-06 | 7.615E-07 | 2.162E-07 |
| 1981 | G13B_A | L11B_A | I20B_S | G1B_R  | 3.8E-07 | 1.2E-06 | 7.620E-07 | 2.476E-07 |
| 1982 | G13B_A | F19B_Q | L23B_Q | E12B_A | 1.7E-07 | 1.3E-06 | 7.620E-07 | 3.543E-07 |
| 1983 | Y10B_A | I20B_N | K17B_A | V24B_Q | 4.8E-07 | 1.3E-06 | 7.625E-07 | 2.103E-07 |
| 1984 | Y10B_A | D6B_A  | E18B_T | I20B_T | 3.8E-07 | 1.1E-06 | 7.630E-07 | 2.019E-07 |
| 1985 | Y10B_A | I20B_Q | T4B_A  | K17B_S | 4.3E-07 | 1.4E-06 | 7.630E-07 | 2.529E-07 |
| 1986 | G13B_A | F3B_A  | I20B_T | G1B_A  | 2.8E-07 | 1.5E-06 | 7.635E-07 | 2.745E-07 |
| 1987 | G13B_A | I20B_T | F19B_W | T4B_A  | 3.9E-07 | 1.3E-06 | 7.640E-07 | 2.628E-07 |
| 1988 | Y10B_A | I20B_T | F19B_Q | Q14B_A | 4.8E-07 | 1.3E-06 | 7.650E-07 | 2.401E-07 |
| 1989 | G13B_A | A16B_N | I20B_Q | F19B_A | 1.7E-07 | 1.6E-06 | 7.655E-07 | 3.948E-07 |
| 1990 | Y10B_A | E18B_T | I20B_Q | Q14B_A | 2.8E-07 | 1.3E-06 | 7.655E-07 | 2.289E-07 |
| 1991 | G13B_A | D6B_A  | F19B_Q | V24B_Q | 3.4E-07 | 1.4E-06 | 7.660E-07 | 3.093E-07 |
| 1992 | G13B_A | A16B_N | L23B_Q | V24B_Q | 1.8E-07 | 1.9E-06 | 7.660E-07 | 4.077E-07 |
| 1993 | Y10B_A | F3B_A  | I20B_S | E12B_A | 4.5E-07 | 1.1E-06 | 7.665E-07 | 1.573E-07 |
| 1994 | Y10B_A | I20B_S | E18B_A | F19B_W | 3.0E-07 | 1.2E-06 | 7.665E-07 | 2.236E-07 |
| 1995 | Y10B_A | K17B_S | V24B_Q | E12B_A | 2.5E-07 | 1.5E-06 | 7.670E-07 | 3.112E-07 |
| 1996 | G13B_A | G1B_R  | F19B_Q | V24B_T | 3.8E-07 | 1.6E-06 | 7.670E-07 | 3.377E-07 |
| 1997 | Y10B_A | G13B_W | I20B_S | E18B_A | 3.7E-07 | 1.4E-06 | 7.670E-07 | 2.786E-07 |
| 1998 | G13B_A | A16B_N | L23B_Q | V24B_T | 1.5E-07 | 1.6E-06 | 7.675E-07 | 3.703E-07 |
| 1999 | G13B_A | A16B_N | K17B_S | V24B_Q | 1.7E-07 | 1.6E-06 | 7.675E-07 | 3.723E-07 |
| 2000 | Y10B_A | S8B_A  | I20B_T | L23B_Q | 3.6E-07 | 1.6E-06 | 7.680E-07 | 3.194E-07 |
| 2001 | Y10B_A | G13B_W | F3B_A  | I20B_T | 4.1E-07 | 1.1E-06 | 7.680E-07 | 2.244E-07 |
| 2002 | G13B_A | I20B_S | T2B_A  | E12B_A | 4.7E-07 | 1.3E-06 | 7.680E-07 | 2.401E-07 |
| 2003 | Y10B_A | I20B_S | F19B_Q | Q14B_A | 3.2E-07 | 1.3E-06 | 7.685E-07 | 2.465E-07 |
| 2004 | G13B_A | E18B_T | S9B_A  | K17B_S | 3.5E-07 | 1.5E-06 | 7.685E-07 | 3.148E-07 |
| 2005 | G13B_A | L23B_R | V24B_Q | G1B_A  | 4.5E-07 | 1.2E-06 | 7.690E-07 | 2.159E-07 |
| 2006 | G13B_A | F19B_W | S9B_A  | L23B_Q | 3.8E-07 | 1.5E-06 | 7.695E-07 | 3.149E-07 |
| 2007 | G13B_A | E18B_A | L23B_Q | V24B_N | 4.0E-07 | 1.1E-06 | 7.700E-07 | 2.009E-07 |
| 2008 | G13B_A | I20B_Q | F19B_W | T2B_A  | 2.7E-07 | 1.5E-06 | 7.700E-07 | 3.545E-07 |
| 2009 | Y10B_A | F19B_Q | E12B_A | V24B_N | 3.3E-07 | 1.4E-06 | 7.700E-07 | 3.381E-07 |
| 2010 | G13B_A | I20B_T | S9B_A  | T2B_A  | 3.6E-07 | 1.3E-06 | 7.705E-07 | 2.481E-07 |
| 2011 | S8B_A  | D6B_A  | I20B_S | S9B_A  | 3.8E-07 | 1.4E-06 | 7.705E-07 | 2.225E-07 |
| 2012 | G13B_A | L11B_A | F19B_Q | V24B_Q | 2.2E-07 | 1.3E-06 | 7.705E-07 | 3.314E-07 |
| 2013 | G13B_A | I20B_S | S9B_A  | T2B_A  | 4.0E-07 | 1.4E-06 | 7.710E-07 | 2.351E-07 |
| 2014 | Y10B_A | I20B_S | K17B_A | L23B_R | 4.1E-07 | 1.1E-06 | 7.715E-07 | 1.890E-07 |
| 2015 | G13B_A | A16B_N | I20B_N | G1B_R  | 2.3E-07 | 1.4E-06 | 7.715E-07 | 3.647E-07 |
| 2016 | G13B_A | I20B_N | T4B_A  | E12B_A | 3.8E-07 | 1.2E-06 | 7.720E-07 | 2.193E-07 |
| 2017 | G13B_A | F19B_Q | V24B_N | G1B_A  | 3.0E-07 | 1.4E-06 | 7.725E-07 | 3.593E-07 |
| 2018 | Y10B_A | I20B_T | E18B_A | E12B_A | 4.3E-07 | 1.1E-06 | 7.730E-07 | 1.648E-07 |
| 2019 | Y10B_A | V7B_A  | I20B_N | F19B_W | 3.9E-07 | 1.5E-06 | 7.730E-07 | 3.133E-07 |
| 2020 | Y10B_A | I20B_T | K17B_A | L23B_R | 4.3E-07 | 1.3E-06 | 7.735E-07 | 2.556E-07 |
| 2021 | Y10B_A | F3B_A  | I20B_N | E12B_A | 3.1E-07 | 1.5E-06 | 7.740E-07 | 3.790E-07 |
| 2022 | G13B_A | A16B_N | L23B_R | V24B_N | 2.5E-07 | 1.4E-06 | 7.745E-07 | 2.903E-07 |
| 2023 | Y10B_A | I20B_S | G1B_R  | E12B_A | 3.4E-07 | 1.6E-06 | 7.760E-07 | 3.255E-07 |
| 2024 | G13B_A | F3B_A  | L23B_Q | K17B_S | 4.7E-07 | 1.1E-06 | 7.765E-07 | 1.679E-07 |
| 2025 | Y10B_A | I20B_Q | K17B_A | V24B_T | 4.7E-07 | 1.5E-06 | 7.770E-07 | 2.415E-07 |
| 2026 | Y10B_A | E18B_T | S9B_A  | V24B_Q | 3.6E-07 | 1.6E-06 | 7.775E-07 | 3.089E-07 |
| 2027 | Y10B_A | K17B_S | E12B_A | V24B_N | 3.4E-07 | 1.3E-06 | 7.780E-07 | 2.692E-07 |



|      |        |        |        |        |         |         |           |           |
|------|--------|--------|--------|--------|---------|---------|-----------|-----------|
| 2028 | Y10B_A | I20B_Q | F19B_Q | T2B_A  | 3.4E-07 | 1.8E-06 | 7.785E-07 | 3.898E-07 |
| 2029 | G13B_A | A16B_N | I20B_N | E18B_A | 1.6E-07 | 1.7E-06 | 7.785E-07 | 4.195E-07 |
| 2030 | G13B_A | L11B_A | L23B_Q | V24B_N | 5.2E-07 | 1.3E-06 | 7.785E-07 | 2.399E-07 |
| 2031 | G13B_A | F19B_W | L23B_R | K17B_S | 3.1E-07 | 1.5E-06 | 7.790E-07 | 3.022E-07 |
| 2032 | G13B_A | I20B_S | F19B_W | Q14B_A | 3.5E-07 | 1.5E-06 | 7.790E-07 | 2.890E-07 |
| 2033 | Y10B_A | I20B_S | K17B_A | V24B_Q | 5.0E-07 | 1.4E-06 | 7.790E-07 | 2.112E-07 |
| 2034 | G13B_A | I20B_Q | T4B_A  | E12B_A | 4.5E-07 | 1.2E-06 | 7.795E-07 | 2.545E-07 |
| 2035 | S8B_A  | D6B_A  | I20B_T | F19B_W | 4.2E-07 | 1.4E-06 | 7.795E-07 | 2.508E-07 |
| 2036 | G13B_A | F3B_A  | I20B_Q | E18B_A | 4.0E-07 | 1.3E-06 | 7.795E-07 | 2.350E-07 |
| 2037 | Y10B_A | V7B_A  | I20B_N | S9B_A  | 4.9E-07 | 1.1E-06 | 7.795E-07 | 1.882E-07 |
| 2038 | Y10B_A | I20B_S | F19B_Q | T2B_A  | 4.1E-07 | 1.2E-06 | 7.800E-07 | 2.717E-07 |
| 2039 | Y10B_A | I20B_T | S5B_A  | K17B_S | 3.3E-07 | 1.2E-06 | 7.805E-07 | 2.165E-07 |
| 2040 | G13B_A | F3B_A  | I20B_Q | F19B_A | 3.3E-07 | 1.8E-06 | 7.805E-07 | 4.451E-07 |
| 2041 | G13B_A | E18B_T | F19B_W | L23B_Q | 2.2E-07 | 1.6E-06 | 7.810E-07 | 4.157E-07 |
| 2042 | G13B_A | V7B_A  | I20B_T | G1B_A  | 4.8E-07 | 9.6E-07 | 7.810E-07 | 1.392E-07 |
| 2043 | Y10B_A | D6B_A  | I20B_N | F19B_W | 3.1E-07 | 1.3E-06 | 7.810E-07 | 2.808E-07 |
| 2044 | Y10B_A | I20B_T | K17B_A | V24B_T | 3.8E-07 | 1.1E-06 | 7.815E-07 | 2.225E-07 |
| 2045 | G13B_A | G1B_R  | F19B_Q | L23B_Q | 3.2E-07 | 1.7E-06 | 7.815E-07 | 3.428E-07 |
| 2046 | Y10B_A | I20B_S | F19B_W | G1B_A  | 3.6E-07 | 1.3E-06 | 7.820E-07 | 2.543E-07 |
| 2047 | G13B_A | I20B_N | E18B_A | G1B_R  | 4.1E-07 | 1.1E-06 | 7.820E-07 | 1.750E-07 |
| 2048 | Y10B_A | I20B_N | E18B_A | S9B_A  | 2.6E-07 | 1.4E-06 | 7.820E-07 | 2.354E-07 |
| 2049 | G13B_A | V7B_A  | L11B_A | I20B_S | 4.1E-07 | 1.3E-06 | 7.825E-07 | 2.381E-07 |
| 2050 | Y10B_A | E18B_T | I20B_T | G1B_A  | 3.4E-07 | 1.7E-06 | 7.825E-07 | 2.972E-07 |
| 2051 | G13B_A | L11B_A | I20B_S | F19B_A | 5.5E-07 | 1.1E-06 | 7.830E-07 | 1.847E-07 |
| 2052 | G13B_A | A16B_N | I20B_S | E18B_A | 1.7E-07 | 1.4E-06 | 7.830E-07 | 2.771E-07 |
| 2053 | Y10B_A | F19B_Q | S9B_A  | V24B_N | 3.8E-07 | 2.4E-06 | 7.840E-07 | 4.612E-07 |
| 2054 | Y10B_A | D6B_A  | I20B_T | S9B_A  | 5.0E-07 | 1.0E-06 | 7.845E-07 | 1.734E-07 |
| 2055 | Y10B_A | F19B_W | K17B_S | V24B_Q | 2.2E-07 | 1.5E-06 | 7.855E-07 | 3.247E-07 |
| 2056 | G13B_A | I20B_S | S5B_A  | F19B_W | 3.9E-07 | 1.5E-06 | 7.860E-07 | 3.353E-07 |
| 2057 | G13B_A | D6B_A  | L23B_R | V24B_N | 4.1E-07 | 1.5E-06 | 7.865E-07 | 2.906E-07 |
| 2058 | G13B_A | E18B_T | I20B_S | S5B_A  | 3.6E-07 | 1.5E-06 | 7.865E-07 | 2.578E-07 |
| 2059 | Y10B_A | I20B_T | T4B_A  | F19B_Q | 2.3E-07 | 1.7E-06 | 7.875E-07 | 4.051E-07 |
| 2060 | Y10B_A | D6B_A  | I20B_N | E12B_A | 5.7E-07 | 1.5E-06 | 7.880E-07 | 2.333E-07 |
| 2061 | Y10B_A | D6B_A  | G13B_W | I20B_Q | 3.2E-07 | 1.5E-06 | 7.885E-07 | 2.838E-07 |
| 2062 | Y10B_A | I20B_S | K17B_A | V24B_T | 4.7E-07 | 1.4E-06 | 7.885E-07 | 2.796E-07 |
| 2063 | Y10B_A | G13B_W | E18B_T | V24B_Q | 4.3E-07 | 1.2E-06 | 7.895E-07 | 2.285E-07 |
| 2064 | Y10B_A | F19B_W | K17B_S | V24B_N | 4.2E-07 | 1.5E-06 | 7.895E-07 | 2.793E-07 |
| 2065 | Y10B_A | I20B_T | K17B_S | Q14B_A | 5.0E-07 | 1.2E-06 | 7.900E-07 | 2.091E-07 |
| 2066 | G13B_A | E18B_T | F19B_Q | L23B_R | 4.4E-07 | 1.8E-06 | 7.900E-07 | 3.482E-07 |
| 2067 | Y10B_A | I20B_N | T4B_A  | K17B_S | 4.3E-07 | 1.2E-06 | 7.910E-07 | 2.678E-07 |
| 2068 | S8B_A  | G13B_W | E18B_T | V24B_N | 3.9E-07 | 1.3E-06 | 7.910E-07 | 2.404E-07 |
| 2069 | Y10B_A | S8B_A  | I20B_Q | K17B_S | 2.5E-07 | 1.4E-06 | 7.910E-07 | 3.426E-07 |
| 2070 | S8B_A  | G13B_W | I20B_S | T4B_A  | 5.4E-07 | 1.0E-06 | 7.910E-07 | 1.477E-07 |
| 2071 | S8B_A  | V7B_A  | E18B_T | I20B_T | 5.7E-07 | 1.1E-06 | 7.914E-07 | 2.159E-07 |
| 2072 | Y10B_A | I20B_N | E12B_A | G1B_A  | 3.3E-07 | 1.4E-06 | 7.915E-07 | 2.434E-07 |
| 2073 | Y10B_A | F3B_A  | I20B_T | E12B_A | 5.3E-07 | 1.4E-06 | 7.920E-07 | 2.432E-07 |
| 2074 | Y10B_A | S8B_A  | G13B_W | I20B_Q | 3.5E-07 | 1.6E-06 | 7.920E-07 | 3.687E-07 |
| 2075 | G13B_A | V7B_A  | L23B_Q | V24B_Q | 3.9E-07 | 1.6E-06 | 7.925E-07 | 3.048E-07 |
| 2076 | Y10B_A | I20B_T | K17B_A | V24B_Q | 4.7E-07 | 1.5E-06 | 7.925E-07 | 2.477E-07 |
| 2077 | Y10B_A | D6B_A  | I20B_Q | S9B_A  | 3.8E-07 | 1.3E-06 | 7.925E-07 | 2.205E-07 |
| 2078 | S8B_A  | D6B_A  | I20B_T | E12B_A | 4.6E-07 | 1.1E-06 | 7.925E-07 | 1.880E-07 |
| 2079 | Y10B_A | A16B_N | I20B_Q | E12B_A | 3.7E-07 | 1.8E-06 | 7.925E-07 | 3.735E-07 |

|      |        |        |        |        |         |         |           |           |
|------|--------|--------|--------|--------|---------|---------|-----------|-----------|
| 2080 | Y10B_A | V7B_A  | I20B_T | E12B_A | 4.5E-07 | 1.2E-06 | 7.930E-07 | 1.966E-07 |
| 2081 | Y10B_A | S9B_A  | L23B_R | K17B_S | 2.6E-07 | 1.6E-06 | 7.930E-07 | 3.055E-07 |
| 2082 | G13B_A | E18B_T | G1B_R  | V24B_T | 5.5E-07 | 1.7E-06 | 7.930E-07 | 2.544E-07 |
| 2083 | G13B_A | I20B_S | F19B_W | T2B_A  | 4.2E-07 | 1.5E-06 | 7.930E-07 | 2.690E-07 |
| 2084 | Y10B_A | I20B_Q | G1B_R  | F19B_A | 2.4E-07 | 1.5E-06 | 7.930E-07 | 3.415E-07 |
| 2085 | G13B_A | I20B_Q | K17B_A | F19B_W | 3.7E-07 | 1.5E-06 | 7.935E-07 | 3.549E-07 |
| 2086 | G13B_A | L11B_A | I20B_Q | F19B_A | 3.4E-07 | 3.1E-06 | 7.945E-07 | 5.803E-07 |
| 2087 | Y10B_A | I20B_S | K17B_S | T2B_A  | 4.5E-07 | 1.4E-06 | 7.945E-07 | 2.679E-07 |
| 2088 | Y10B_A | I20B_S | E18B_A | K17B_S | 3.5E-07 | 1.3E-06 | 7.955E-07 | 2.694E-07 |
| 2089 | Y10B_A | I20B_N | E18B_A | F19B_W | 4.2E-07 | 1.7E-06 | 7.955E-07 | 3.173E-07 |
| 2090 | Y10B_A | D6B_A  | I20B_T | F19B_W | 4.9E-07 | 1.3E-06 | 7.960E-07 | 2.051E-07 |
| 2091 | S8B_A  | V7B_A  | E18B_T | I20B_Q | 3.6E-07 | 1.1E-06 | 7.960E-07 | 2.913E-07 |
| 2092 | Y10B_A | I20B_N | K17B_A | L23B_Q | 4.1E-07 | 1.3E-06 | 7.960E-07 | 2.313E-07 |
| 2093 | G13B_A | E18B_T | L23B_R | E12B_A | 4.5E-07 | 1.5E-06 | 7.970E-07 | 2.244E-07 |
| 2094 | G13B_A | F3B_A  | L23B_R | V24B_T | 4.6E-07 | 1.1E-06 | 7.975E-07 | 1.716E-07 |
| 2095 | Y10B_A | F19B_W | L23B_R | V24B_T | 3.3E-07 | 1.6E-06 | 7.975E-07 | 3.249E-07 |
| 2096 | Y10B_A | G13B_W | I20B_Q | T4B_A  | 3.7E-07 | 1.4E-06 | 7.975E-07 | 3.127E-07 |
| 2097 | Y10B_A | I20B_T | L11B_A | F19B_W | 4.1E-07 | 1.1E-06 | 7.980E-07 | 2.334E-07 |
| 2098 | Y10B_A | G13B_W | F19B_W | V24B_Q | 3.8E-07 | 1.2E-06 | 7.980E-07 | 2.621E-07 |
| 2099 | G13B_A | T4B_A  | L23B_Q | V24B_Q | 2.9E-07 | 1.2E-06 | 7.980E-07 | 2.615E-07 |
| 2100 | Y10B_A | I20B_N | G1B_R  | E12B_A | 4.2E-07 | 1.3E-06 | 7.985E-07 | 2.360E-07 |
| 2101 | G13B_A | F3B_A  | I20B_S | G1B_R  | 5.7E-07 | 1.1E-06 | 7.985E-07 | 1.270E-07 |
| 2102 | G13B_A | D6B_A  | I20B_S | G1B_R  | 5.7E-07 | 1.4E-06 | 7.985E-07 | 1.917E-07 |
| 2103 | G13B_A | I20B_Q | S5B_A  | E12B_A | 3.8E-07 | 1.5E-06 | 7.985E-07 | 2.992E-07 |
| 2104 | Y10B_A | F3B_A  | I20B_S | S9B_A  | 4.2E-07 | 1.3E-06 | 7.985E-07 | 2.237E-07 |
| 2105 | Y10B_A | F3B_A  | I20B_T | F19B_W | 2.4E-07 | 1.3E-06 | 7.990E-07 | 2.850E-07 |
| 2106 | Y10B_A | I20B_N | G1B_R  | F19B_A | 5.7E-07 | 1.7E-06 | 7.995E-07 | 2.789E-07 |
| 2107 | Y10B_A | V7B_A  | I20B_S | E12B_A | 4.5E-07 | 1.1E-06 | 8.000E-07 | 1.744E-07 |
| 2108 | Y10B_A | S8B_A  | I20B_T | K17B_S | 3.5E-07 | 1.4E-06 | 8.005E-07 | 2.522E-07 |
| 2109 | G13B_A | F3B_A  | I20B_N | F19B_A | 4.1E-07 | 1.4E-06 | 8.005E-07 | 2.899E-07 |
| 2110 | G13B_A | V7B_A  | A16B_N | I20B_T | 2.0E-07 | 1.3E-06 | 8.010E-07 | 2.912E-07 |
| 2111 | Y10B_A | G13B_W | A16B_N | I20B_S | 3.7E-07 | 1.2E-06 | 8.010E-07 | 2.048E-07 |
| 2112 | Y10B_A | E18B_T | F19B_Q | L23B_Q | 1.6E-07 | 2.1E-06 | 8.010E-07 | 4.616E-07 |
| 2113 | G13B_A | V7B_A  | I20B_Q | E18B_A | 4.7E-07 | 1.2E-06 | 8.010E-07 | 2.333E-07 |
| 2114 | G13B_A | A16B_N | I20B_Q | G1B_A  | 2.5E-07 | 1.8E-06 | 8.015E-07 | 4.212E-07 |
| 2115 | G13B_A | D6B_A  | I20B_N | L11B_A | 5.2E-07 | 1.2E-06 | 8.035E-07 | 2.286E-07 |
| 2116 | Y10B_A | I20B_S | K17B_A | L23B_Q | 3.4E-07 | 1.3E-06 | 8.035E-07 | 2.424E-07 |
| 2117 | Y10B_A | L23B_Q | E12B_A | V24B_N | 3.3E-07 | 1.9E-06 | 8.035E-07 | 3.384E-07 |
| 2118 | G13B_A | G1B_R  | L23B_Q | V24B_T | 4.1E-07 | 1.1E-06 | 8.035E-07 | 2.102E-07 |
| 2119 | G13B_A | D6B_A  | A16B_N | I20B_Q | 1.7E-07 | 1.2E-06 | 8.035E-07 | 2.698E-07 |
| 2120 | Y10B_A | D6B_A  | I20B_S | E12B_A | 4.8E-07 | 1.4E-06 | 8.040E-07 | 2.248E-07 |
| 2121 | G13B_A | I20B_S | E18B_A | F19B_A | 4.8E-07 | 1.4E-06 | 8.040E-07 | 2.651E-07 |
| 2122 | S8B_A  | D6B_A  | G13B_W | I20B_T | 4.2E-07 | 1.3E-06 | 8.040E-07 | 2.573E-07 |
| 2123 | Y10B_A | I20B_N | K17B_A | V24B_T | 4.2E-07 | 1.2E-06 | 8.040E-07 | 2.417E-07 |
| 2124 | G13B_A | V7B_A  | A16B_N | I20B_Q | 2.7E-07 | 1.4E-06 | 8.055E-07 | 3.094E-07 |
| 2125 | G13B_A | I20B_S | E18B_A | G1B_R  | 4.4E-07 | 1.5E-06 | 8.055E-07 | 2.679E-07 |
| 2126 | G13B_A | I20B_S | T4B_A  | E12B_A | 3.8E-07 | 1.1E-06 | 8.055E-07 | 1.867E-07 |
| 2127 | G13B_A | E18B_T | I20B_Q | T2B_A  | 3.6E-07 | 2.3E-06 | 8.060E-07 | 4.557E-07 |
| 2128 | G13B_A | D6B_A  | L11B_A | I20B_S | 4.4E-07 | 1.7E-06 | 8.065E-07 | 2.696E-07 |
| 2129 | Y10B_A | S8B_A  | I20B_N | L23B_Q | 3.1E-07 | 1.4E-06 | 8.075E-07 | 3.376E-07 |
| 2130 | G13B_A | V7B_A  | I20B_N | L11B_A | 4.8E-07 | 1.3E-06 | 8.075E-07 | 1.981E-07 |
| 2131 | G13B_A | V7B_A  | F3B_A  | I20B_T | 4.1E-07 | 1.1E-06 | 8.075E-07 | 1.610E-07 |

|      |        |        |        |        |         |         |           |           |
|------|--------|--------|--------|--------|---------|---------|-----------|-----------|
| 2132 | Y10B_A | I20B_T | E18B_A | S9B_A  | 5.3E-07 | 1.2E-06 | 8.085E-07 | 1.801E-07 |
| 2133 | Y10B_A | L11B_A | I20B_Q | E12B_A | 3.1E-07 | 1.2E-06 | 8.085E-07 | 2.121E-07 |
| 2134 | G13B_A | E18B_T | F19B_W | K17B_S | 2.8E-07 | 1.3E-06 | 8.085E-07 | 3.074E-07 |
| 2135 | Y10B_A | G13B_W | I20B_T | S5B_A  | 5.3E-07 | 1.4E-06 | 8.095E-07 | 2.153E-07 |
| 2136 | G13B_A | F19B_W | L23B_Q | E12B_A | 4.5E-07 | 2.0E-06 | 8.095E-07 | 3.619E-07 |
| 2137 | G13B_A | A16B_N | I20B_S | G1B_R  | 2.8E-07 | 1.7E-06 | 8.100E-07 | 3.612E-07 |
| 2138 | Y10B_A | F3B_A  | I20B_N | F19B_W | 4.3E-07 | 1.5E-06 | 8.100E-07 | 3.086E-07 |
| 2139 | G13B_A | L23B_R | F19B_A | V24B_T | 4.2E-07 | 1.4E-06 | 8.105E-07 | 2.542E-07 |
| 2140 | G13B_A | F3B_A  | A16B_N | I20B_S | 1.9E-07 | 1.4E-06 | 8.110E-07 | 3.672E-07 |
| 2141 | S8B_A  | V7B_A  | I20B_N | F19B_W | 3.5E-07 | 1.2E-06 | 8.111E-07 | 2.749E-07 |
| 2142 | Y10B_A | I20B_T | K17B_A | V24B_N | 3.3E-07 | 1.6E-06 | 8.115E-07 | 2.771E-07 |
| 2143 | Y10B_A | L23B_Q | F19B_A | V24B_Q | 4.6E-07 | 1.4E-06 | 8.120E-07 | 2.473E-07 |
| 2144 | G13B_A | E18B_T | I20B_Q | K17B_A | 4.0E-07 | 1.8E-06 | 8.130E-07 | 3.381E-07 |
| 2145 | G13B_A | F3B_A  | F19B_Q | V24B_Q | 2.8E-07 | 1.8E-06 | 8.150E-07 | 3.961E-07 |
| 2146 | Y10B_A | I20B_N | E18B_T | T2B_A  | 5.5E-07 | 1.3E-06 | 8.155E-07 | 2.092E-07 |
| 2147 | S8B_A  | D6B_A  | I20B_S | F19B_W | 3.6E-07 | 1.3E-06 | 8.160E-07 | 2.917E-07 |
| 2148 | G13B_A | D6B_A  | A16B_N | I20B_S | 1.3E-07 | 1.3E-06 | 8.160E-07 | 3.814E-07 |
| 2149 | G13B_A | I20B_T | F19B_W | T2B_A  | 5.4E-07 | 1.8E-06 | 8.165E-07 | 3.131E-07 |
| 2150 | G13B_A | D6B_A  | A16B_N | I20B_T | 2.1E-07 | 1.2E-06 | 8.170E-07 | 3.067E-07 |
| 2151 | Y10B_A | I20B_N | S9B_A  | Q14B_A | 4.2E-07 | 1.3E-06 | 8.170E-07 | 2.621E-07 |
| 2152 | G13B_A | E18B_T | F19B_Q | K17B_S | 3.2E-07 | 1.7E-06 | 8.170E-07 | 3.192E-07 |
| 2153 | G13B_A | D6B_A  | L23B_R | V24B_T | 5.8E-07 | 1.5E-06 | 8.175E-07 | 2.641E-07 |
| 2154 | G13B_A | Y10B_A | F3B_A  | I20B_Q | 4.9E-07 | 1.3E-06 | 8.175E-07 | 2.331E-07 |
| 2155 | Y10B_A | I20B_S | E18B_A | S9B_A  | 3.8E-07 | 1.4E-06 | 8.175E-07 | 2.636E-07 |
| 2156 | Y10B_A | I20B_Q | S5B_A  | S9B_A  | 4.2E-07 | 1.4E-06 | 8.180E-07 | 2.946E-07 |
| 2157 | G13B_A | D6B_A  | I20B_N | F19B_A | 5.0E-07 | 1.3E-06 | 8.180E-07 | 2.647E-07 |
| 2158 | G13B_A | E18B_A | L23B_Q | V24B_T | 4.4E-07 | 1.9E-06 | 8.180E-07 | 3.725E-07 |
| 2159 | Y10B_A | I20B_N | T4B_A  | F19B_Q | 4.2E-07 | 1.4E-06 | 8.185E-07 | 2.671E-07 |
| 2160 | G13B_A | S9B_A  | L23B_R | E12B_A | 4.0E-07 | 1.4E-06 | 8.185E-07 | 2.321E-07 |
| 2161 | G13B_A | F19B_Q | S9B_A  | E12B_A | 3.7E-07 | 1.4E-06 | 8.195E-07 | 3.136E-07 |
| 2162 | G13B_A | I20B_S | S5B_A  | E12B_A | 4.5E-07 | 1.4E-06 | 8.195E-07 | 2.855E-07 |
| 2163 | Y10B_A | A16B_N | I20B_S | S9B_A  | 2.1E-07 | 1.7E-06 | 8.195E-07 | 3.648E-07 |
| 2164 | Y10B_A | G1B_R  | L23B_Q | V24B_Q | 5.8E-07 | 1.3E-06 | 8.195E-07 | 1.796E-07 |
| 2165 | G13B_A | I20B_T | L11B_A | G1B_A  | 5.4E-07 | 1.2E-06 | 8.205E-07 | 1.778E-07 |
| 2166 | Y10B_A | S8B_A  | I20B_N | E18B_T | 4.7E-07 | 1.4E-06 | 8.205E-07 | 2.369E-07 |
| 2167 | Y10B_A | D6B_A  | I20B_S | F19B_W | 3.6E-07 | 1.4E-06 | 8.205E-07 | 2.682E-07 |
| 2168 | Y10B_A | F3B_A  | I20B_S | F19B_W | 4.7E-07 | 1.9E-06 | 8.210E-07 | 3.346E-07 |
| 2169 | S8B_A  | V7B_A  | I20B_N | E12B_A | 6.2E-07 | 1.1E-06 | 8.210E-07 | 1.316E-07 |
| 2170 | G13B_A | I20B_T | K17B_A | S9B_A  | 3.8E-07 | 1.4E-06 | 8.220E-07 | 2.681E-07 |
| 2171 | Y10B_A | S8B_A  | G13B_W | I20B_N | 2.7E-07 | 1.9E-06 | 8.225E-07 | 3.513E-07 |
| 2172 | G13B_A | D6B_A  | I20B_T | G1B_R  | 4.4E-07 | 2.0E-06 | 8.225E-07 | 3.180E-07 |
| 2173 | G13B_A | L23B_Q | V24B_Q | T2B_A  | 5.2E-07 | 1.3E-06 | 8.230E-07 | 1.837E-07 |
| 2174 | G13B_A | S5B_A  | L23B_R | V24B_Q | 4.4E-07 | 1.9E-06 | 8.230E-07 | 2.945E-07 |
| 2175 | Y10B_A | I20B_N | F19B_W | G1B_A  | 4.3E-07 | 1.5E-06 | 8.235E-07 | 2.969E-07 |
| 2176 | G13B_A | F3B_A  | I20B_T | L11B_A | 5.0E-07 | 1.5E-06 | 8.235E-07 | 2.356E-07 |
| 2177 | G13B_A | A16B_N | I20B_T | G1B_A  | 2.6E-07 | 1.5E-06 | 8.235E-07 | 3.421E-07 |
| 2178 | Y10B_A | G13B_W | I20B_T | T2B_A  | 5.6E-07 | 1.4E-06 | 8.235E-07 | 2.276E-07 |
| 2179 | G13B_A | G1B_R  | F19B_Q | V24B_N | 4.0E-07 | 1.9E-06 | 8.240E-07 | 3.481E-07 |
| 2180 | G13B_A | I20B_T | L11B_A | E18B_A | 5.2E-07 | 1.1E-06 | 8.245E-07 | 1.944E-07 |
| 2181 | G13B_A | I20B_N | Q14B_A | E12B_A | 4.5E-07 | 1.2E-06 | 8.260E-07 | 2.202E-07 |
| 2182 | Y10B_A | I20B_Q | E18B_A | F19B_W | 2.5E-07 | 2.6E-06 | 8.270E-07 | 5.701E-07 |
| 2183 | Y10B_A | I20B_N | E18B_T | Q14B_A | 4.9E-07 | 1.3E-06 | 8.270E-07 | 2.271E-07 |

|      |        |        |        |        |         |         |           |           |
|------|--------|--------|--------|--------|---------|---------|-----------|-----------|
| 2184 | G13B_A | V7B_A  | L23B_R | V24B_T | 4.6E-07 | 1.3E-06 | 8.275E-07 | 2.142E-07 |
| 2185 | G13B_A | I20B_T | E18B_A | F19B_A | 3.8E-07 | 1.4E-06 | 8.280E-07 | 2.414E-07 |
| 2186 | S8B_A  | D6B_A  | I20B_Q | F19B_A | 3.9E-07 | 1.4E-06 | 8.280E-07 | 2.921E-07 |
| 2187 | G13B_A | D6B_A  | F3B_A  | I20B_T | 3.8E-07 | 1.3E-06 | 8.280E-07 | 2.155E-07 |
| 2188 | G13B_A | A16B_N | I20B_T | E18B_A | 2.2E-07 | 1.6E-06 | 8.280E-07 | 3.978E-07 |
| 2189 | Y10B_A | F3B_A  | I20B_Q | E12B_A | 4.5E-07 | 1.4E-06 | 8.290E-07 | 2.802E-07 |
| 2190 | G13B_A | Y10B_A | I20B_T | G1B_R  | 5.0E-07 | 1.1E-06 | 8.290E-07 | 1.642E-07 |
| 2191 | Y10B_A | V7B_A  | I20B_T | F19B_W | 3.9E-07 | 1.4E-06 | 8.295E-07 | 2.982E-07 |
| 2192 | G13B_A | F3B_A  | I20B_N | G1B_A  | 4.8E-07 | 1.5E-06 | 8.305E-07 | 2.771E-07 |
| 2193 | G13B_A | V7B_A  | F3B_A  | I20B_S | 5.7E-07 | 1.2E-06 | 8.305E-07 | 1.771E-07 |
| 2194 | Y10B_A | E18B_T | S9B_A  | V24B_N | 4.9E-07 | 2.3E-06 | 8.305E-07 | 3.936E-07 |
| 2195 | Y10B_A | I20B_Q | T4B_A  | E12B_A | 4.1E-07 | 1.1E-06 | 8.305E-07 | 1.870E-07 |
| 2196 | Y10B_A | I20B_T | K17B_A | L23B_Q | 3.5E-07 | 1.8E-06 | 8.315E-07 | 4.210E-07 |
| 2197 | G13B_A | G1B_R  | K17B_S | V24B_Q | 4.1E-07 | 1.2E-06 | 8.320E-07 | 2.274E-07 |
| 2198 | G13B_A | F3B_A  | A16B_N | I20B_T | 1.7E-07 | 1.8E-06 | 8.325E-07 | 4.160E-07 |
| 2199 | Y10B_A | I20B_Q | K17B_S | Q14B_A | 3.3E-07 | 2.0E-06 | 8.325E-07 | 4.218E-07 |
| 2200 | G13B_A | S8B_A  | I20B_S | F19B_W | 4.3E-07 | 1.5E-06 | 8.325E-07 | 2.785E-07 |
| 2201 | Y10B_A | I20B_S | T4B_A  | F19B_Q | 4.9E-07 | 1.5E-06 | 8.330E-07 | 2.372E-07 |
| 2202 | G13B_A | E18B_A | L23B_Q | V24B_Q | 4.7E-07 | 1.4E-06 | 8.340E-07 | 3.120E-07 |
| 2203 | Y10B_A | F3B_A  | L23B_Q | V24B_N | 2.4E-07 | 1.3E-06 | 8.345E-07 | 2.615E-07 |
| 2204 | Y10B_A | V7B_A  | I20B_T | G1B_R  | 4.1E-07 | 1.1E-06 | 8.350E-07 | 2.379E-07 |
| 2205 | Y10B_A | I20B_Q | T4B_A  | F19B_Q | 2.4E-07 | 1.3E-06 | 8.370E-07 | 2.901E-07 |
| 2206 | G13B_A | A16B_N | I20B_S | G1B_A  | 2.8E-07 | 1.6E-06 | 8.370E-07 | 3.235E-07 |
| 2207 | G13B_A | V7B_A  | I20B_N | G1B_A  | 4.1E-07 | 1.2E-06 | 8.375E-07 | 2.350E-07 |
| 2208 | Y10B_A | V7B_A  | L11B_A | I20B_Q | 5.2E-07 | 1.4E-06 | 8.375E-07 | 2.366E-07 |
| 2209 | Y10B_A | F19B_Q | L23B_Q | E12B_A | 3.9E-07 | 1.6E-06 | 8.375E-07 | 2.952E-07 |
| 2210 | Y10B_A | I20B_Q | K17B_A | L23B_Q | 3.3E-07 | 1.4E-06 | 8.380E-07 | 3.002E-07 |
| 2211 | G13B_A | A16B_N | I20B_N | G1B_A  | 2.6E-07 | 1.6E-06 | 8.385E-07 | 3.146E-07 |
| 2212 | Y10B_A | L23B_Q | F19B_A | V24B_T | 4.4E-07 | 1.3E-06 | 8.385E-07 | 2.048E-07 |
| 2213 | S8B_A  | G13B_W | L23B_Q | K17B_S | 4.2E-07 | 1.3E-06 | 8.390E-07 | 2.593E-07 |
| 2214 | Y10B_A | L23B_Q | V24B_N | G1B_A  | 3.8E-07 | 1.4E-06 | 8.390E-07 | 2.748E-07 |
| 2215 | Y10B_A | I20B_N | S5B_A  | F19B_Q | 2.4E-07 | 2.1E-06 | 8.395E-07 | 3.713E-07 |
| 2216 | G13B_A | V7B_A  | I20B_T | E18B_A | 4.4E-07 | 1.2E-06 | 8.400E-07 | 2.144E-07 |
| 2217 | Y10B_A | G13B_W | I20B_Q | Q14B_A | 4.6E-07 | 1.5E-06 | 8.400E-07 | 3.076E-07 |
| 2218 | S8B_A  | G13B_W | A16B_N | I20B_T | 4.4E-07 | 1.3E-06 | 8.400E-07 | 2.278E-07 |
| 2219 | S8B_A  | D6B_A  | I20B_S | E12B_A | 4.8E-07 | 1.1E-06 | 8.405E-07 | 1.779E-07 |
| 2220 | G13B_A | L11B_A | F19B_Q | V24B_N | 4.3E-07 | 1.6E-06 | 8.415E-07 | 3.272E-07 |
| 2221 | Y10B_A | D6B_A  | I20B_Q | G1B_R  | 3.8E-07 | 1.4E-06 | 8.420E-07 | 2.966E-07 |
| 2222 | G13B_A | F3B_A  | I20B_N | L11B_A | 5.7E-07 | 1.7E-06 | 8.420E-07 | 2.478E-07 |
| 2223 | G13B_A | F3B_A  | I20B_S | G1B_A  | 4.6E-07 | 1.5E-06 | 8.420E-07 | 2.716E-07 |
| 2224 | G13B_A | L11B_A | K17B_S | V24B_N | 5.2E-07 | 1.7E-06 | 8.425E-07 | 3.060E-07 |
| 2225 | Y10B_A | S8B_A  | I20B_S | S9B_A  | 4.9E-07 | 1.3E-06 | 8.435E-07 | 2.310E-07 |
| 2226 | G13B_A | E18B_T | L11B_A | V24B_N | 4.1E-07 | 1.3E-06 | 8.435E-07 | 2.814E-07 |
| 2227 | Y10B_A | L23B_Q | K17B_S | E12B_A | 5.2E-07 | 1.2E-06 | 8.440E-07 | 2.156E-07 |
| 2228 | G13B_A | V7B_A  | F19B_Q | L23B_Q | 2.7E-07 | 1.8E-06 | 8.455E-07 | 4.432E-07 |
| 2229 | Y10B_A | I20B_N | E18B_T | S5B_A  | 4.7E-07 | 1.4E-06 | 8.455E-07 | 3.068E-07 |
| 2230 | G13B_A | V7B_A  | I20B_S | G1B_A  | 4.9E-07 | 1.7E-06 | 8.455E-07 | 2.543E-07 |
| 2231 | Y10B_A | I20B_S | K17B_A | F19B_Q | 4.9E-07 | 1.3E-06 | 8.460E-07 | 1.991E-07 |
| 2232 | G13B_A | I20B_Q | G1B_R  | T4B_A  | 3.5E-07 | 1.3E-06 | 8.465E-07 | 2.791E-07 |
| 2233 | G13B_A | V7B_A  | I20B_T | L11B_A | 4.1E-07 | 1.5E-06 | 8.470E-07 | 2.296E-07 |
| 2234 | S8B_A  | G13B_W | K17B_S | V24B_N | 5.3E-07 | 1.5E-06 | 8.470E-07 | 2.671E-07 |
| 2235 | S8B_A  | D6B_A  | G13B_W | I20B_N | 4.4E-07 | 1.6E-06 | 8.475E-07 | 3.025E-07 |

|      |        |        |        |        |         |         |           |           |
|------|--------|--------|--------|--------|---------|---------|-----------|-----------|
| 2236 | G13B_A | A16B_N | I20B_N | L11B_A | 1.2E-07 | 1.9E-06 | 8.475E-07 | 4.015E-07 |
| 2237 | Y10B_A | G13B_W | S9B_A  | V24B_N | 3.9E-07 | 1.6E-06 | 8.480E-07 | 3.203E-07 |
| 2238 | Y10B_A | S8B_A  | I20B_Q | S9B_A  | 3.8E-07 | 1.2E-06 | 8.495E-07 | 2.186E-07 |
| 2239 | G13B_A | S8B_A  | I20B_N | F19B_W | 4.6E-07 | 1.1E-06 | 8.495E-07 | 1.962E-07 |
| 2240 | Y10B_A | I20B_N | L11B_A | G1B_R  | 4.3E-07 | 1.3E-06 | 8.500E-07 | 2.888E-07 |
| 2241 | Y10B_A | G13B_W | I20B_Q | T2B_A  | 5.2E-07 | 1.5E-06 | 8.505E-07 | 2.927E-07 |
| 2242 | G13B_A | D6B_A  | F3B_A  | I20B_N | 4.5E-07 | 1.2E-06 | 8.510E-07 | 1.982E-07 |
| 2243 | G13B_A | I20B_N | E18B_A | F19B_A | 3.8E-07 | 1.5E-06 | 8.510E-07 | 3.204E-07 |
| 2244 | Y10B_A | F19B_Q | L23B_R | K17B_S | 3.8E-07 | 1.3E-06 | 8.515E-07 | 2.563E-07 |
| 2245 | G13B_A | D6B_A  | V7B_A  | I20B_N | 3.9E-07 | 1.2E-06 | 8.515E-07 | 2.045E-07 |
| 2246 | G13B_A | A16B_N | K17B_S | V24B_N | 1.4E-07 | 1.5E-06 | 8.535E-07 | 4.021E-07 |
| 2247 | Y10B_A | I20B_S | S5B_A  | K17B_S | 4.7E-07 | 1.2E-06 | 8.550E-07 | 2.486E-07 |
| 2248 | Y10B_A | E18B_T | I20B_T | T2B_A  | 4.7E-07 | 1.3E-06 | 8.555E-07 | 2.210E-07 |
| 2249 | S8B_A  | G13B_W | I20B_N | E18B_A | 3.0E-07 | 1.2E-06 | 8.555E-07 | 2.116E-07 |
| 2250 | Y10B_A | F19B_Q | V24B_T | E12B_A | 4.0E-07 | 1.9E-06 | 8.560E-07 | 3.628E-07 |
| 2251 | Y10B_A | E18B_T | K17B_S | V24B_T | 4.6E-07 | 1.6E-06 | 8.565E-07 | 2.705E-07 |
| 2252 | Y10B_A | I20B_S | K17B_S | Q14B_A | 4.3E-07 | 1.4E-06 | 8.565E-07 | 2.792E-07 |
| 2253 | G13B_A | Y10B_A | I20B_Q | G1B_R  | 3.3E-07 | 1.3E-06 | 8.570E-07 | 2.627E-07 |
| 2254 | G13B_A | L23B_Q | V24B_T | T2B_A  | 3.8E-07 | 1.2E-06 | 8.570E-07 | 2.153E-07 |
| 2255 | Y10B_A | I20B_T | K17B_S | T2B_A  | 4.3E-07 | 1.4E-06 | 8.575E-07 | 2.826E-07 |
| 2256 | Y10B_A | V7B_A  | A16B_N | I20B_Q | 2.6E-07 | 2.1E-06 | 8.575E-07 | 4.405E-07 |
| 2257 | G13B_A | S5B_A  | L23B_R | V24B_N | 5.1E-07 | 1.9E-06 | 8.575E-07 | 3.336E-07 |
| 2258 | G13B_A | F19B_W | V24B_Q | E12B_A | 2.9E-07 | 1.6E-06 | 8.580E-07 | 2.763E-07 |
| 2259 | G13B_A | E18B_T | G1B_R  | V24B_N | 4.5E-07 | 1.5E-06 | 8.590E-07 | 3.137E-07 |
| 2260 | Y10B_A | E18B_T | F19B_Q | K17B_S | 3.3E-07 | 1.9E-06 | 8.600E-07 | 4.394E-07 |
| 2261 | Y10B_A | S8B_A  | E18B_T | I20B_S | 3.7E-07 | 1.3E-06 | 8.600E-07 | 2.755E-07 |
| 2262 | S8B_A  | G13B_W | S9B_A  | V24B_T | 4.8E-07 | 1.3E-06 | 8.610E-07 | 2.339E-07 |
| 2263 | Y10B_A | E18B_T | L23B_Q | K17B_S | 4.8E-07 | 1.4E-06 | 8.610E-07 | 2.799E-07 |
| 2264 | G13B_A | S8B_A  | I20B_Q | G1B_R  | 2.8E-07 | 1.5E-06 | 8.615E-07 | 3.030E-07 |
| 2265 | G13B_A | I20B_Q | G1B_R  | S5B_A  | 4.1E-07 | 1.3E-06 | 8.615E-07 | 2.673E-07 |
| 2266 | G13B_A | L11B_A | I20B_Q | E18B_A | 6.0E-07 | 1.6E-06 | 8.615E-07 | 2.780E-07 |
| 2267 | G13B_A | D6B_A  | F3B_A  | I20B_S | 5.4E-07 | 1.3E-06 | 8.615E-07 | 2.028E-07 |
| 2268 | G13B_A | L23B_R | T2B_A  | V24B_N | 3.7E-07 | 1.3E-06 | 8.620E-07 | 2.455E-07 |
| 2269 | Y10B_A | S8B_A  | I20B_Q | E12B_A | 4.5E-07 | 1.5E-06 | 8.625E-07 | 2.732E-07 |
| 2270 | Y10B_A | E18B_T | F19B_Q | V24B_T | 2.7E-07 | 1.8E-06 | 8.630E-07 | 4.459E-07 |
| 2271 | Y10B_A | I20B_Q | K17B_A | F19B_Q | 1.4E-07 | 1.7E-06 | 8.635E-07 | 4.653E-07 |
| 2272 | Y10B_A | F19B_Q | V24B_Q | G1B_A  | 3.3E-07 | 2.3E-06 | 8.635E-07 | 4.395E-07 |
| 2273 | G13B_A | I20B_Q | E18B_A | G1B_A  | 4.2E-07 | 1.6E-06 | 8.635E-07 | 3.446E-07 |
| 2274 | G13B_A | D6B_A  | K17B_S | V24B_N | 4.7E-07 | 1.3E-06 | 8.640E-07 | 2.803E-07 |
| 2275 | S8B_A  | G13B_W | F19B_W | L23B_Q | 4.8E-07 | 1.6E-06 | 8.640E-07 | 3.033E-07 |
| 2276 | G13B_A | G1B_R  | L23B_Q | K17B_S | 2.8E-07 | 1.4E-06 | 8.640E-07 | 2.903E-07 |
| 2277 | Y10B_A | F3B_A  | A16B_N | I20B_Q | 1.5E-07 | 1.8E-06 | 8.645E-07 | 5.089E-07 |
| 2278 | G13B_A | F3B_A  | A16B_N | I20B_N | 1.4E-07 | 1.4E-06 | 8.650E-07 | 3.493E-07 |
| 2279 | G13B_A | Y10B_A | L11B_A | I20B_Q | 3.2E-07 | 1.4E-06 | 8.650E-07 | 2.994E-07 |
| 2280 | Y10B_A | L11B_A | L23B_R | V24B_Q | 4.4E-07 | 1.3E-06 | 8.650E-07 | 2.515E-07 |
| 2281 | G13B_A | F3B_A  | I20B_T | E18B_A | 4.4E-07 | 1.2E-06 | 8.655E-07 | 2.027E-07 |
| 2282 | G13B_A | F3B_A  | I20B_T | F19B_A | 5.5E-07 | 1.2E-06 | 8.665E-07 | 1.615E-07 |
| 2283 | Y10B_A | I20B_N | K17B_S | Q14B_A | 4.3E-07 | 1.8E-06 | 8.665E-07 | 3.569E-07 |
| 2284 | Y10B_A | S8B_A  | E18B_T | I20B_Q | 4.5E-07 | 1.3E-06 | 8.670E-07 | 2.509E-07 |
| 2285 | G13B_A | F19B_Q | V24B_T | G1B_A  | 3.6E-07 | 1.8E-06 | 8.680E-07 | 4.381E-07 |
| 2286 | Y10B_A | A16B_N | L23B_R | V24B_Q | 2.1E-07 | 1.7E-06 | 8.680E-07 | 4.554E-07 |
| 2287 | G13B_A | Y10B_A | L23B_R | V24B_N | 4.6E-07 | 1.3E-06 | 8.680E-07 | 2.275E-07 |

|      |        |        |        |        |         |         |           |           |
|------|--------|--------|--------|--------|---------|---------|-----------|-----------|
| 2288 | Y10B_A | F19B_Q | S9B_A  | K17B_S | 3.4E-07 | 1.7E-06 | 8.680E-07 | 3.301E-07 |
| 2289 | G13B_A | D6B_A  | I20B_Q | G1B_A  | 3.4E-07 | 2.3E-06 | 8.685E-07 | 4.241E-07 |
| 2290 | S8B_A  | G13B_W | S9B_A  | L23B_R | 4.5E-07 | 2.0E-06 | 8.695E-07 | 4.008E-07 |
| 2291 | S8B_A  | G13B_W | L23B_R | K17B_S | 3.3E-07 | 1.6E-06 | 8.700E-07 | 2.840E-07 |
| 2292 | Y10B_A | S8B_A  | I20B_N | K17B_S | 3.7E-07 | 1.3E-06 | 8.715E-07 | 2.361E-07 |
| 2293 | Y10B_A | L23B_Q | F19B_A | V24B_N | 4.2E-07 | 1.4E-06 | 8.720E-07 | 2.815E-07 |
| 2294 | G13B_A | D6B_A  | I20B_N | G1B_R  | 4.8E-07 | 1.5E-06 | 8.720E-07 | 2.491E-07 |
| 2295 | S8B_A  | G13B_W | E12B_A | V24B_N | 5.2E-07 | 1.4E-06 | 8.725E-07 | 2.531E-07 |
| 2296 | Y10B_A | S8B_A  | I20B_S | K17B_S | 4.1E-07 | 1.6E-06 | 8.730E-07 | 3.413E-07 |
| 2297 | Y10B_A | V7B_A  | L23B_Q | V24B_T | 3.8E-07 | 1.3E-06 | 8.730E-07 | 2.470E-07 |
| 2298 | G13B_A | A16B_N | I20B_Q | E18B_A | 2.8E-07 | 1.5E-06 | 8.735E-07 | 3.619E-07 |
| 2299 | G13B_A | E18B_A | L23B_R | V24B_T | 3.2E-07 | 1.4E-06 | 8.735E-07 | 2.798E-07 |
| 2300 | Y10B_A | S8B_A  | I20B_T | F19B_W | 5.4E-07 | 1.6E-06 | 8.735E-07 | 2.567E-07 |
| 2301 | G13B_A | D6B_A  | V7B_A  | I20B_S | 5.2E-07 | 1.3E-06 | 8.745E-07 | 2.007E-07 |
| 2302 | G13B_A | L11B_A | S9B_A  | V24B_N | 4.1E-07 | 1.1E-06 | 8.750E-07 | 2.127E-07 |
| 2303 | Y10B_A | I20B_Q | S5B_A  | F19B_W | 4.6E-07 | 1.6E-06 | 8.755E-07 | 3.316E-07 |
| 2304 | Y10B_A | F19B_W | K17B_S | V24B_T | 5.5E-07 | 1.3E-06 | 8.760E-07 | 2.200E-07 |
| 2305 | G13B_A | S8B_A  | L23B_Q | V24B_Q | 4.2E-07 | 1.7E-06 | 8.765E-07 | 3.534E-07 |
| 2306 | Y10B_A | I20B_S | S9B_A  | Q14B_A | 6.5E-07 | 1.7E-06 | 8.775E-07 | 2.531E-07 |
| 2307 | Y10B_A | V7B_A  | L23B_Q | V24B_Q | 4.2E-07 | 1.7E-06 | 8.780E-07 | 2.809E-07 |
| 2308 | Y10B_A | G13B_W | E18B_T | V24B_N | 4.1E-07 | 1.6E-06 | 8.790E-07 | 2.853E-07 |
| 2309 | Y10B_A | G1B_R  | L23B_Q | V24B_T | 3.9E-07 | 1.5E-06 | 8.790E-07 | 3.286E-07 |
| 2310 | Y10B_A | G13B_W | L23B_R | K17B_S | 4.7E-07 | 1.5E-06 | 8.800E-07 | 2.998E-07 |
| 2311 | G13B_A | D6B_A  | I20B_S | E18B_A | 3.9E-07 | 1.6E-06 | 8.800E-07 | 2.873E-07 |
| 2312 | Y10B_A | V7B_A  | I20B_Q | G1B_R  | 4.1E-07 | 1.3E-06 | 8.800E-07 | 2.418E-07 |
| 2313 | Y10B_A | I20B_N | E18B_A | E12B_A | 4.3E-07 | 1.5E-06 | 8.805E-07 | 2.841E-07 |
| 2314 | S8B_A  | G13B_W | K17B_S | V24B_T | 5.4E-07 | 1.3E-06 | 8.805E-07 | 2.449E-07 |
| 2315 | Y10B_A | I20B_N | F19B_A | E12B_A | 4.3E-07 | 2.8E-06 | 8.805E-07 | 4.996E-07 |
| 2316 | Y10B_A | I20B_N | S5B_A  | K17B_S | 4.3E-07 | 1.4E-06 | 8.805E-07 | 2.850E-07 |
| 2317 | Y10B_A | I20B_N | K17B_S | T2B_A  | 5.0E-07 | 1.7E-06 | 8.810E-07 | 2.888E-07 |
| 2318 | G13B_A | F19B_W | S9B_A  | K17B_S | 4.3E-07 | 1.6E-06 | 8.810E-07 | 2.750E-07 |
| 2319 | G13B_A | G1B_R  | S9B_A  | V24B_Q | 5.3E-07 | 1.4E-06 | 8.810E-07 | 2.162E-07 |
| 2320 | G13B_A | F19B_Q | L23B_Q | G1B_A  | 4.4E-07 | 1.5E-06 | 8.815E-07 | 2.918E-07 |
| 2321 | Y10B_A | I20B_S | S9B_A  | T2B_A  | 5.0E-07 | 1.7E-06 | 8.815E-07 | 3.015E-07 |
| 2322 | Y10B_A | I20B_Q | F19B_W | Q14B_A | 3.7E-07 | 1.5E-06 | 8.820E-07 | 3.510E-07 |
| 2323 | Y10B_A | V7B_A  | L23B_Q | V24B_N | 4.4E-07 | 1.7E-06 | 8.820E-07 | 3.174E-07 |
| 2324 | G13B_A | E18B_T | I20B_S | T4B_A  | 4.2E-07 | 1.5E-06 | 8.820E-07 | 3.271E-07 |
| 2325 | G13B_A | F3B_A  | S9B_A  | V24B_N | 4.3E-07 | 1.6E-06 | 8.825E-07 | 2.759E-07 |
| 2326 | G13B_A | D6B_A  | A16B_N | I20B_N | 2.1E-07 | 1.7E-06 | 8.825E-07 | 3.563E-07 |
| 2327 | Y10B_A | I20B_S | E18B_A | E12B_A | 5.0E-07 | 1.3E-06 | 8.825E-07 | 2.080E-07 |
| 2328 | S8B_A  | G13B_W | S9B_A  | V24B_Q | 3.9E-07 | 1.4E-06 | 8.825E-07 | 2.482E-07 |
| 2329 | Y10B_A | K17B_S | V24B_T | E12B_A | 3.9E-07 | 1.6E-06 | 8.830E-07 | 2.708E-07 |
| 2330 | Y10B_A | I20B_Q | F19B_W | T4B_A  | 5.1E-07 | 1.4E-06 | 8.830E-07 | 3.110E-07 |
| 2331 | G13B_A | F3B_A  | L11B_A | I20B_S | 5.7E-07 | 1.5E-06 | 8.830E-07 | 2.485E-07 |
| 2332 | G13B_A | A16B_N | F19B_Q | V24B_Q | 2.1E-07 | 2.7E-06 | 8.835E-07 | 7.138E-07 |
| 2333 | S8B_A  | G13B_W | F19B_Q | L23B_R | 3.1E-07 | 1.5E-06 | 8.840E-07 | 2.722E-07 |
| 2334 | G13B_A | D6B_A  | V7B_A  | I20B_T | 6.1E-07 | 1.3E-06 | 8.840E-07 | 1.968E-07 |
| 2335 | Y10B_A | I20B_S | F19B_W | Q14B_A | 4.4E-07 | 1.5E-06 | 8.845E-07 | 3.259E-07 |
| 2336 | G13B_A | D6B_A  | I20B_N | G1B_A  | 6.1E-07 | 1.4E-06 | 8.845E-07 | 2.131E-07 |
| 2337 | Y10B_A | G13B_W | E18B_T | L23B_Q | 1.7E-07 | 2.1E-06 | 8.845E-07 | 3.885E-07 |
| 2338 | G13B_A | F3B_A  | I20B_Q | T2B_A  | 3.2E-07 | 1.5E-06 | 8.845E-07 | 2.536E-07 |
| 2339 | Y10B_A | I20B_N | S9B_A  | T2B_A  | 4.7E-07 | 1.7E-06 | 8.850E-07 | 2.811E-07 |

|      |        |        |        |        |         |         |           |           |
|------|--------|--------|--------|--------|---------|---------|-----------|-----------|
| 2340 | G13B_A | S9B_A  | K17B_S | E12B_A | 3.5E-07 | 1.6E-06 | 8.855E-07 | 2.913E-07 |
| 2341 | G13B_A | I20B_T | E18B_A | G1B_A  | 5.2E-07 | 1.2E-06 | 8.855E-07 | 2.040E-07 |
| 2342 | G13B_A | V7B_A  | K17B_S | V24B_N | 3.2E-07 | 1.8E-06 | 8.860E-07 | 3.641E-07 |
| 2343 | Y10B_A | A16B_N | I20B_Q | G1B_R  | 3.0E-07 | 1.7E-06 | 8.860E-07 | 4.574E-07 |
| 2344 | G13B_A | E18B_T | V24B_T | G1B_A  | 5.9E-07 | 1.2E-06 | 8.865E-07 | 1.877E-07 |
| 2345 | G13B_A | A16B_N | F19B_Q | L23B_Q | 2.1E-07 | 1.7E-06 | 8.865E-07 | 4.451E-07 |
| 2346 | G13B_A | G1B_R  | F19B_W | L23B_Q | 4.5E-07 | 1.6E-06 | 8.865E-07 | 2.909E-07 |
| 2347 | G13B_A | F19B_W | V24B_T | E12B_A | 4.4E-07 | 1.8E-06 | 8.865E-07 | 3.209E-07 |
| 2348 | Y10B_A | I20B_N | K17B_A | F19B_Q | 3.2E-07 | 1.9E-06 | 8.865E-07 | 4.121E-07 |
| 2349 | G13B_A | F3B_A  | E18B_T | V24B_T | 5.8E-07 | 1.3E-06 | 8.870E-07 | 1.842E-07 |
| 2350 | G13B_A | S8B_A  | A16B_N | I20B_Q | 1.5E-07 | 1.8E-06 | 8.870E-07 | 4.409E-07 |
| 2351 | G13B_A | I20B_S | E18B_A | G1B_A  | 4.4E-07 | 1.7E-06 | 8.870E-07 | 3.097E-07 |
| 2352 | G13B_A | S8B_A  | I20B_Q | F19B_A | 3.8E-07 | 1.5E-06 | 8.875E-07 | 3.306E-07 |
| 2353 | G13B_A | G1B_R  | S9B_A  | L23B_Q | 4.4E-07 | 1.3E-06 | 8.875E-07 | 2.348E-07 |
| 2354 | Y10B_A | I20B_Q | K17B_S | T2B_A  | 3.1E-07 | 2.1E-06 | 8.875E-07 | 4.655E-07 |
| 2355 | Y10B_A | G13B_W | E18B_T | V24B_T | 5.7E-07 | 1.3E-06 | 8.880E-07 | 2.128E-07 |
| 2356 | G13B_A | A16B_N | I20B_T | L11B_A | 2.3E-07 | 1.6E-06 | 8.885E-07 | 3.861E-07 |
| 2357 | S8B_A  | G13B_W | F19B_W | V24B_Q | 2.8E-07 | 1.5E-06 | 8.890E-07 | 3.179E-07 |
| 2358 | G13B_A | A16B_N | S9B_A  | V24B_Q | 2.9E-07 | 1.5E-06 | 8.900E-07 | 4.162E-07 |
| 2359 | G13B_A | V7B_A  | I20B_N | F19B_A | 4.7E-07 | 1.4E-06 | 8.900E-07 | 2.412E-07 |
| 2360 | G13B_A | I20B_S | G1B_R  | T2B_A  | 3.5E-07 | 1.5E-06 | 8.905E-07 | 3.111E-07 |
| 2361 | G13B_A | E18B_T | G1B_R  | V24B_Q | 6.5E-07 | 1.5E-06 | 8.905E-07 | 1.907E-07 |
| 2362 | G13B_A | I20B_N | K17B_A | F19B_W | 3.9E-07 | 1.7E-06 | 8.915E-07 | 3.341E-07 |
| 2363 | Y10B_A | I20B_Q | S9B_A  | T2B_A  | 4.2E-07 | 1.4E-06 | 8.920E-07 | 2.350E-07 |
| 2364 | Y10B_A | I20B_Q | F19B_A | G1B_A  | 4.5E-07 | 1.6E-06 | 8.920E-07 | 3.248E-07 |
| 2365 | G13B_A | S8B_A  | V7B_A  | I20B_Q | 3.9E-07 | 1.6E-06 | 8.920E-07 | 2.943E-07 |
| 2366 | Y10B_A | G13B_W | I20B_S | T2B_A  | 4.6E-07 | 1.5E-06 | 8.920E-07 | 2.438E-07 |
| 2367 | G13B_A | K17B_S | V24B_T | G1B_A  | 4.3E-07 | 1.5E-06 | 8.925E-07 | 2.435E-07 |
| 2368 | Y10B_A | G13B_W | I20B_S | S5B_A  | 4.4E-07 | 1.4E-06 | 8.925E-07 | 2.592E-07 |
| 2369 | G13B_A | F3B_A  | E18B_T | V24B_Q | 5.7E-07 | 1.3E-06 | 8.955E-07 | 2.083E-07 |
| 2370 | G13B_A | I20B_S | K17B_A | S9B_A  | 3.8E-07 | 1.5E-06 | 8.955E-07 | 2.986E-07 |
| 2371 | G13B_A | V7B_A  | K17B_S | V24B_T | 5.4E-07 | 1.5E-06 | 8.955E-07 | 2.301E-07 |
| 2372 | Y10B_A | S8B_A  | I20B_T | S9B_A  | 6.5E-07 | 1.2E-06 | 8.955E-07 | 1.739E-07 |
| 2373 | G13B_A | F3B_A  | F19B_Q | V24B_N | 4.8E-07 | 1.4E-06 | 8.955E-07 | 2.801E-07 |
| 2374 | Y10B_A | E18B_T | I20B_T | T4B_A  | 4.1E-07 | 1.8E-06 | 8.955E-07 | 3.548E-07 |
| 2375 | G13B_A | D6B_A  | F3B_A  | I20B_Q | 3.6E-07 | 1.7E-06 | 8.960E-07 | 3.459E-07 |
| 2376 | G13B_A | T4B_A  | L23B_Q | V24B_N | 3.6E-07 | 1.8E-06 | 8.960E-07 | 3.585E-07 |
| 2377 | Y10B_A | E18B_T | I20B_S | Q14B_A | 4.7E-07 | 1.3E-06 | 8.965E-07 | 2.336E-07 |
| 2378 | G13B_A | F19B_Q | T2B_A  | V24B_N | 3.7E-07 | 1.9E-06 | 8.970E-07 | 4.244E-07 |
| 2379 | Y10B_A | L23B_Q | V24B_Q | G1B_A  | 6.0E-07 | 1.5E-06 | 8.975E-07 | 2.236E-07 |
| 2380 | G13B_A | F3B_A  | F19B_Q | L23B_Q | 4.4E-07 | 1.6E-06 | 8.980E-07 | 3.422E-07 |
| 2381 | G13B_A | L11B_A | F19B_W | V24B_N | 5.5E-07 | 1.5E-06 | 8.980E-07 | 2.583E-07 |
| 2382 | Y10B_A | G1B_R  | L23B_Q | V24B_N | 2.7E-07 | 1.3E-06 | 8.990E-07 | 3.165E-07 |
| 2383 | G13B_A | I20B_N | T4B_A  | F19B_A | 4.7E-07 | 1.6E-06 | 8.990E-07 | 2.387E-07 |
| 2384 | G13B_A | S5B_A  | L23B_Q | V24B_N | 5.3E-07 | 1.6E-06 | 8.995E-07 | 3.049E-07 |
| 2385 | S8B_A  | G13B_W | I20B_N | Q14B_A | 5.4E-07 | 1.6E-06 | 9.000E-07 | 2.497E-07 |
| 2386 | G13B_A | E18B_T | I20B_S | K17B_A | 6.4E-07 | 1.5E-06 | 9.000E-07 | 2.592E-07 |
| 2387 | G13B_A | K17B_S | V24B_Q | G1B_A  | 3.3E-07 | 1.4E-06 | 9.005E-07 | 3.080E-07 |
| 2388 | G13B_A | E18B_T | F19B_Q | E12B_A | 4.8E-07 | 2.0E-06 | 9.020E-07 | 3.416E-07 |
| 2389 | S8B_A  | G13B_W | S9B_A  | V24B_N | 5.7E-07 | 1.3E-06 | 9.020E-07 | 2.382E-07 |
| 2390 | Y10B_A | F3B_A  | I20B_N | F19B_A | 4.3E-07 | 1.9E-06 | 9.020E-07 | 4.034E-07 |
| 2391 | Y10B_A | S8B_A  | G13B_W | I20B_T | 6.4E-07 | 1.5E-06 | 9.025E-07 | 2.499E-07 |

|      |        |        |        |        |         |         |           |           |
|------|--------|--------|--------|--------|---------|---------|-----------|-----------|
| 2392 | S8B_A  | G13B_W | E18B_T | V24B_Q | 4.1E-07 | 2.6E-06 | 9.025E-07 | 4.793E-07 |
| 2393 | G13B_A | I20B_Q | F19B_A | T2B_A  | 3.3E-07 | 1.7E-06 | 9.025E-07 | 3.729E-07 |
| 2394 | G13B_A | G1B_R  | F19B_Q | L23B_R | 3.4E-07 | 1.4E-06 | 9.030E-07 | 2.354E-07 |
| 2395 | G13B_A | Y10B_A | I20B_N | G1B_R  | 5.9E-07 | 1.3E-06 | 9.030E-07 | 1.812E-07 |
| 2396 | Y10B_A | S8B_A  | E18B_T | I20B_T | 2.9E-07 | 1.5E-06 | 9.035E-07 | 3.398E-07 |
| 2397 | S8B_A  | G13B_W | I20B_Q | S5B_A  | 5.1E-07 | 1.4E-06 | 9.035E-07 | 2.364E-07 |
| 2398 | G13B_A | V7B_A  | F19B_Q | V24B_T | 5.0E-07 | 1.5E-06 | 9.040E-07 | 3.242E-07 |
| 2399 | Y10B_A | I20B_S | F19B_W | T2B_A  | 3.3E-07 | 1.7E-06 | 9.040E-07 | 3.417E-07 |
| 2400 | Y10B_A | I20B_T | F19B_W | T2B_A  | 2.8E-07 | 1.5E-06 | 9.040E-07 | 3.480E-07 |
| 2401 | S8B_A  | G13B_W | V24B_Q | E12B_A | 4.4E-07 | 1.4E-06 | 9.045E-07 | 2.373E-07 |
| 2402 | G13B_A | F3B_A  | K17B_S | V24B_N | 3.7E-07 | 1.5E-06 | 9.045E-07 | 3.288E-07 |
| 2403 | G13B_A | I20B_N | E18B_A | G1B_A  | 5.2E-07 | 1.6E-06 | 9.050E-07 | 2.525E-07 |
| 2404 | Y10B_A | A16B_N | I20B_T | G1B_R  | 3.5E-07 | 1.4E-06 | 9.050E-07 | 3.297E-07 |
| 2405 | G13B_A | A16B_N | I20B_Q | T2B_A  | 1.6E-07 | 1.8E-06 | 9.055E-07 | 4.590E-07 |
| 2406 | Y10B_A | I20B_Q | S5B_A  | E12B_A | 5.7E-07 | 1.9E-06 | 9.060E-07 | 2.920E-07 |
| 2407 | G13B_A | K17B_S | F19B_A | V24B_Q | 5.0E-07 | 2.0E-06 | 9.060E-07 | 4.020E-07 |
| 2408 | G13B_A | L11B_A | L23B_Q | V24B_T | 3.9E-07 | 1.4E-06 | 9.060E-07 | 2.409E-07 |
| 2409 | G13B_A | L11B_A | I20B_S | E18B_A | 5.8E-07 | 1.4E-06 | 9.065E-07 | 2.163E-07 |
| 2410 | G13B_A | K17B_S | F19B_A | V24B_N | 5.4E-07 | 2.2E-06 | 9.065E-07 | 3.932E-07 |
| 2411 | G13B_A | F3B_A  | K17B_S | V24B_Q | 5.4E-07 | 1.7E-06 | 9.065E-07 | 2.983E-07 |
| 2412 | Y10B_A | E18B_T | I20B_T | Q14B_A | 4.7E-07 | 1.6E-06 | 9.075E-07 | 3.214E-07 |
| 2413 | Y10B_A | A16B_N | L23B_Q | V24B_N | 2.0E-07 | 2.3E-06 | 9.075E-07 | 4.822E-07 |
| 2414 | G13B_A | I20B_Q | S5B_A  | G1B_A  | 4.4E-07 | 1.9E-06 | 9.080E-07 | 3.130E-07 |
| 2415 | Y10B_A | G13B_W | S9B_A  | V24B_T | 5.9E-07 | 1.5E-06 | 9.080E-07 | 2.172E-07 |
| 2416 | Y10B_A | D6B_A  | I20B_T | E12B_A | 5.7E-07 | 1.6E-06 | 9.085E-07 | 2.916E-07 |
| 2417 | Y10B_A | E18B_T | E12B_A | V24B_N | 6.2E-07 | 1.5E-06 | 9.085E-07 | 2.811E-07 |
| 2418 | G13B_A | I20B_T | L11B_A | T2B_A  | 4.4E-07 | 1.4E-06 | 9.085E-07 | 2.686E-07 |
| 2419 | G13B_A | I20B_N | G1B_R  | S5B_A  | 5.0E-07 | 1.5E-06 | 9.090E-07 | 2.921E-07 |
| 2420 | S8B_A  | G13B_W | E18B_T | L23B_Q | 5.4E-07 | 1.5E-06 | 9.090E-07 | 2.320E-07 |
| 2421 | Y10B_A | G13B_W | E18B_T | L23B_R | 3.9E-07 | 1.7E-06 | 9.110E-07 | 3.772E-07 |
| 2422 | G13B_A | A16B_N | E18B_T | V24B_N | 1.8E-07 | 1.7E-06 | 9.115E-07 | 4.199E-07 |
| 2423 | Y10B_A | F19B_W | S9B_A  | V24B_Q | 4.8E-07 | 1.4E-06 | 9.120E-07 | 2.302E-07 |
| 2424 | G13B_A | A16B_N | L11B_A | I20B_S | 2.0E-07 | 1.6E-06 | 9.120E-07 | 3.915E-07 |
| 2425 | G13B_A | D6B_A  | I20B_T | G1B_A  | 7.2E-07 | 1.3E-06 | 9.125E-07 | 1.518E-07 |
| 2426 | Y10B_A | G13B_W | I20B_T | Q14B_A | 3.9E-07 | 1.7E-06 | 9.125E-07 | 2.846E-07 |
| 2427 | S8B_A  | D6B_A  | L23B_Q | V24B_N | 5.8E-07 | 1.8E-06 | 9.125E-07 | 3.390E-07 |
| 2428 | Y10B_A | V7B_A  | L23B_R | V24B_Q | 5.4E-07 | 1.7E-06 | 9.130E-07 | 2.570E-07 |
| 2429 | Y10B_A | E18B_T | V24B_T | E12B_A | 5.6E-07 | 1.5E-06 | 9.140E-07 | 2.699E-07 |
| 2430 | Y10B_A | I20B_Q | T2B_A  | E12B_A | 5.7E-07 | 1.6E-06 | 9.140E-07 | 2.886E-07 |
| 2431 | Y10B_A | L11B_A | L23B_Q | V24B_Q | 4.0E-07 | 1.6E-06 | 9.140E-07 | 2.962E-07 |
| 2432 | S8B_A  | G13B_W | I20B_Q | T2B_A  | 5.1E-07 | 2.1E-06 | 9.145E-07 | 4.058E-07 |
| 2433 | G13B_A | A16B_N | I20B_T | F19B_A | 5.0E-07 | 1.5E-06 | 9.145E-07 | 3.089E-07 |
| 2434 | Y10B_A | I20B_T | F19B_A | G1B_A  | 4.6E-07 | 1.3E-06 | 9.150E-07 | 2.291E-07 |
| 2435 | S8B_A  | V7B_A  | I20B_N | F19B_A | 6.2E-07 | 1.4E-06 | 9.150E-07 | 2.542E-07 |
| 2436 | G13B_A | E18B_T | G1B_R  | L23B_Q | 4.9E-07 | 1.9E-06 | 9.150E-07 | 3.157E-07 |
| 2437 | G13B_A | S9B_A  | V24B_N | G1B_A  | 4.0E-07 | 1.5E-06 | 9.155E-07 | 3.058E-07 |
| 2438 | S8B_A  | D6B_A  | L23B_Q | V24B_Q | 4.7E-07 | 1.6E-06 | 9.155E-07 | 3.188E-07 |
| 2439 | S8B_A  | V7B_A  | F3B_A  | I20B_Q | 4.6E-07 | 1.7E-06 | 9.155E-07 | 2.854E-07 |
| 2440 | Y10B_A | G13B_W | K17B_S | V24B_T | 4.5E-07 | 1.8E-06 | 9.160E-07 | 3.489E-07 |
| 2441 | G13B_A | F3B_A  | K17B_S | V24B_T | 4.6E-07 | 1.3E-06 | 9.160E-07 | 2.240E-07 |
| 2442 | G13B_A | F3B_A  | I20B_N | E18B_A | 5.4E-07 | 1.3E-06 | 9.165E-07 | 2.243E-07 |
| 2443 | Y10B_A | I20B_N | T4B_A  | E12B_A | 5.1E-07 | 1.7E-06 | 9.165E-07 | 2.987E-07 |



|      |        |        |        |        |         |         |           |           |
|------|--------|--------|--------|--------|---------|---------|-----------|-----------|
| 2444 | G13B_A | E18B_T | L23B_Q | F19B_A | 4.7E-07 | 1.4E-06 | 9.180E-07 | 2.637E-07 |
| 2445 | G13B_A | F3B_A  | I20B_Q | Q14B_A | 5.6E-07 | 1.4E-06 | 9.180E-07 | 2.806E-07 |
| 2446 | G13B_A | T4B_A  | F19B_Q | V24B_Q | 2.0E-07 | 1.8E-06 | 9.185E-07 | 3.660E-07 |
| 2447 | Y10B_A | F3B_A  | I20B_Q | G1B_A  | 3.6E-07 | 1.4E-06 | 9.190E-07 | 3.156E-07 |
| 2448 | G13B_A | E18B_A | F19B_Q | V24B_N | 3.2E-07 | 2.2E-06 | 9.190E-07 | 4.449E-07 |
| 2449 | Y10B_A | F3B_A  | L23B_Q | V24B_T | 2.8E-07 | 1.3E-06 | 9.190E-07 | 2.519E-07 |
| 2450 | Y10B_A | E18B_T | V24B_Q | E12B_A | 5.6E-07 | 1.7E-06 | 9.195E-07 | 3.088E-07 |
| 2451 | Y10B_A | G13B_W | S9B_A  | V24B_Q | 5.0E-07 | 1.5E-06 | 9.195E-07 | 2.386E-07 |
| 2452 | Y10B_A | G13B_W | S9B_A  | L23B_Q | 4.2E-07 | 2.0E-06 | 9.200E-07 | 3.425E-07 |
| 2453 | G13B_A | E18B_A | F19B_Q | L23B_Q | 3.4E-07 | 1.6E-06 | 9.200E-07 | 3.759E-07 |
| 2454 | G13B_A | F3B_A  | L23B_R | K17B_S | 3.8E-07 | 1.6E-06 | 9.200E-07 | 3.060E-07 |
| 2455 | G13B_A | G1B_R  | S9B_A  | V24B_N | 5.2E-07 | 1.4E-06 | 9.205E-07 | 2.379E-07 |
| 2456 | Y10B_A | K17B_S | F19B_A | V24B_Q | 5.5E-07 | 1.5E-06 | 9.210E-07 | 2.273E-07 |
| 2457 | G13B_A | F3B_A  | F19B_Q | K17B_S | 3.7E-07 | 1.5E-06 | 9.215E-07 | 3.023E-07 |
| 2458 | G13B_A | L23B_R | K17B_S | G1B_A  | 5.4E-07 | 1.9E-06 | 9.215E-07 | 3.636E-07 |
| 2459 | G13B_A | Y10B_A | L23B_R | V24B_Q | 5.4E-07 | 1.4E-06 | 9.220E-07 | 2.256E-07 |
| 2460 | G13B_A | Y10B_A | I20B_Q | G1B_A  | 6.1E-07 | 1.4E-06 | 9.220E-07 | 2.074E-07 |
| 2461 | Y10B_A | G13B_W | I20B_S | Q14B_A | 4.5E-07 | 1.4E-06 | 9.225E-07 | 2.835E-07 |
| 2462 | Y10B_A | I20B_S | T4B_A  | K17B_S | 3.8E-07 | 1.5E-06 | 9.230E-07 | 3.125E-07 |
| 2463 | Y10B_A | F19B_Q | S9B_A  | L23B_R | 3.6E-07 | 1.6E-06 | 9.235E-07 | 3.754E-07 |
| 2464 | S8B_A  | D6B_A  | L23B_R | V24B_Q | 4.7E-07 | 1.4E-06 | 9.235E-07 | 2.705E-07 |
| 2465 | Y10B_A | E18B_T | F19B_W | V24B_N | 4.1E-07 | 1.9E-06 | 9.235E-07 | 3.901E-07 |
| 2466 | Y10B_A | I20B_T | S9B_A  | T2B_A  | 6.5E-07 | 1.4E-06 | 9.240E-07 | 2.274E-07 |
| 2467 | Y10B_A | D6B_A  | A16B_N | I20B_Q | 1.6E-07 | 1.7E-06 | 9.240E-07 | 4.702E-07 |
| 2468 | Y10B_A | A16B_N | F19B_Q | V24B_N | 2.5E-07 | 1.9E-06 | 9.250E-07 | 4.586E-07 |
| 2469 | G13B_A | T4B_A  | L23B_R | V24B_T | 4.6E-07 | 1.4E-06 | 9.250E-07 | 2.457E-07 |
| 2470 | G13B_A | V7B_A  | L23B_Q | K17B_S | 4.2E-07 | 1.5E-06 | 9.250E-07 | 2.996E-07 |
| 2471 | G13B_A | V7B_A  | E18B_T | V24B_Q | 5.0E-07 | 1.8E-06 | 9.265E-07 | 2.867E-07 |
| 2472 | G13B_A | T4B_A  | L23B_R | V24B_N | 4.4E-07 | 1.7E-06 | 9.265E-07 | 3.469E-07 |
| 2473 | G13B_A | Y10B_A | L23B_Q | V24B_N | 4.9E-07 | 1.7E-06 | 9.270E-07 | 3.585E-07 |
| 2474 | G13B_A | G1B_R  | E12B_A | V24B_N | 5.6E-07 | 1.5E-06 | 9.275E-07 | 2.762E-07 |
| 2475 | G13B_A | Y10B_A | L23B_Q | V24B_Q | 3.2E-07 | 1.6E-06 | 9.275E-07 | 3.673E-07 |
| 2476 | G13B_A | S8B_A  | A16B_N | I20B_T | 2.0E-07 | 2.1E-06 | 9.275E-07 | 5.537E-07 |
| 2477 | S8B_A  | G13B_W | F19B_W | V24B_T | 6.4E-07 | 1.5E-06 | 9.275E-07 | 2.366E-07 |
| 2478 | Y10B_A | A16B_N | I20B_T | L11B_A | 3.1E-07 | 1.6E-06 | 9.280E-07 | 3.711E-07 |
| 2479 | Y10B_A | A16B_N | F19B_Q | V24B_Q | 2.1E-07 | 1.5E-06 | 9.280E-07 | 3.934E-07 |
| 2480 | G13B_A | F3B_A  | S9B_A  | V24B_Q | 6.7E-07 | 1.3E-06 | 9.280E-07 | 1.614E-07 |
| 2481 | Y10B_A | F3B_A  | L23B_Q | V24B_Q | 4.7E-07 | 1.4E-06 | 9.290E-07 | 2.398E-07 |
| 2482 | G13B_A | L23B_Q | K17B_S | G1B_A  | 4.7E-07 | 1.9E-06 | 9.290E-07 | 3.253E-07 |
| 2483 | G13B_A | L23B_Q | T2B_A  | V24B_N | 2.9E-07 | 1.6E-06 | 9.295E-07 | 3.366E-07 |
| 2484 | Y10B_A | E18B_T | I20B_S | T4B_A  | 6.5E-07 | 1.5E-06 | 9.295E-07 | 2.288E-07 |
| 2485 | S8B_A  | G13B_W | I20B_T | S5B_A  | 6.3E-07 | 1.6E-06 | 9.300E-07 | 2.225E-07 |
| 2486 | Y10B_A | G1B_R  | L23B_R | V24B_Q | 4.2E-07 | 1.3E-06 | 9.300E-07 | 2.572E-07 |
| 2487 | S8B_A  | D6B_A  | I20B_Q | G1B_R  | 3.7E-07 | 1.6E-06 | 9.310E-07 | 3.122E-07 |
| 2488 | Y10B_A | G13B_W | F19B_W | L23B_Q | 4.7E-07 | 1.6E-06 | 9.310E-07 | 3.176E-07 |
| 2489 | Y10B_A | L11B_A | I20B_Q | G1B_R  | 4.1E-07 | 1.5E-06 | 9.310E-07 | 3.514E-07 |
| 2490 | G13B_A | I20B_T | T2B_A  | G1B_A  | 6.6E-07 | 1.4E-06 | 9.320E-07 | 1.795E-07 |
| 2491 | Y10B_A | I20B_Q | Q14B_A | E12B_A | 4.8E-07 | 1.6E-06 | 9.320E-07 | 3.204E-07 |
| 2492 | S8B_A  | G13B_W | I20B_S | T2B_A  | 4.6E-07 | 1.4E-06 | 9.320E-07 | 2.187E-07 |
| 2493 | G13B_A | S8B_A  | L23B_Q | V24B_T | 5.5E-07 | 1.4E-06 | 9.325E-07 | 2.469E-07 |
| 2494 | G13B_A | I20B_T | G1B_R  | T2B_A  | 5.0E-07 | 1.5E-06 | 9.330E-07 | 2.335E-07 |
| 2495 | Y10B_A | I20B_Q | T4B_A  | S9B_A  | 3.8E-07 | 1.6E-06 | 9.330E-07 | 3.788E-07 |

|      |        |        |        |        |         |         |           |           |
|------|--------|--------|--------|--------|---------|---------|-----------|-----------|
| 2496 | Y10B_A | E18B_T | I20B_Q | S5B_A  | 4.5E-07 | 1.5E-06 | 9.330E-07 | 3.525E-07 |
| 2497 | G13B_A | S9B_A  | F19B_A | V24B_N | 5.7E-07 | 1.7E-06 | 9.330E-07 | 2.702E-07 |
| 2498 | S8B_A  | G13B_W | S9B_A  | L23B_Q | 5.2E-07 | 1.2E-06 | 9.335E-07 | 2.063E-07 |
| 2499 | Y10B_A | E18B_T | L23B_R | K17B_S | 4.3E-07 | 1.5E-06 | 9.335E-07 | 3.495E-07 |
| 2500 | G13B_A | I20B_N | E18B_T | K17B_A | 5.6E-07 | 1.9E-06 | 9.335E-07 | 3.238E-07 |
| 2501 | G13B_A | D6B_A  | I20B_S | G1B_A  | 6.0E-07 | 1.6E-06 | 9.335E-07 | 2.631E-07 |
| 2502 | G13B_A | L11B_A | L23B_R | K17B_S | 6.0E-07 | 1.3E-06 | 9.340E-07 | 2.059E-07 |
| 2503 | S8B_A  | G13B_W | I20B_N | T2B_A  | 5.4E-07 | 1.6E-06 | 9.345E-07 | 3.127E-07 |
| 2504 | G13B_A | L11B_A | I20B_Q | S5B_A  | 4.4E-07 | 1.9E-06 | 9.350E-07 | 3.581E-07 |
| 2505 | Y10B_A | I20B_Q | F19B_W | T2B_A  | 4.3E-07 | 1.9E-06 | 9.350E-07 | 3.498E-07 |
| 2506 | S8B_A  | G13B_W | L23B_Q | E12B_A | 4.5E-07 | 1.5E-06 | 9.355E-07 | 2.672E-07 |
| 2507 | G13B_A | L23B_Q | E12B_A | G1B_A  | 3.4E-07 | 1.3E-06 | 9.360E-07 | 2.524E-07 |
| 2508 | Y10B_A | S8B_A  | I20B_S | F19B_W | 5.2E-07 | 1.4E-06 | 9.360E-07 | 2.760E-07 |
| 2509 | G13B_A | F19B_W | V24B_Q | G1B_A  | 3.4E-07 | 1.6E-06 | 9.360E-07 | 2.960E-07 |
| 2510 | S8B_A  | G13B_W | E18B_T | L23B_R | 5.4E-07 | 1.7E-06 | 9.365E-07 | 3.292E-07 |
| 2511 | Y10B_A | G13B_W | F19B_Q | L23B_R | 4.8E-07 | 1.6E-06 | 9.370E-07 | 3.207E-07 |
| 2512 | Y10B_A | L23B_R | V24B_N | G1B_A  | 4.1E-07 | 1.6E-06 | 9.370E-07 | 3.999E-07 |
| 2513 | G13B_A | A16B_N | I20B_N | T2B_A  | 2.2E-07 | 2.0E-06 | 9.375E-07 | 5.284E-07 |
| 2514 | G13B_A | V7B_A  | I20B_T | Q14B_A | 3.7E-07 | 1.2E-06 | 9.375E-07 | 1.949E-07 |
| 2515 | G13B_A | K17B_S | V24B_N | G1B_A  | 3.7E-07 | 1.4E-06 | 9.380E-07 | 2.415E-07 |
| 2516 | Y10B_A | L11B_A | L23B_Q | V24B_T | 4.0E-07 | 1.6E-06 | 9.380E-07 | 3.521E-07 |
| 2517 | Y10B_A | G13B_W | V24B_Q | E12B_A | 6.1E-07 | 1.4E-06 | 9.385E-07 | 2.518E-07 |
| 2518 | G13B_A | F19B_W | V24B_N | G1B_A  | 4.7E-07 | 2.2E-06 | 9.385E-07 | 4.006E-07 |
| 2519 | Y10B_A | E18B_T | S9B_A  | L23B_Q | 4.5E-07 | 1.5E-06 | 9.390E-07 | 3.509E-07 |
| 2520 | Y10B_A | S8B_A  | I20B_T | E12B_A | 4.1E-07 | 1.3E-06 | 9.390E-07 | 2.309E-07 |
| 2521 | G13B_A | V7B_A  | S9B_A  | V24B_Q | 4.8E-07 | 1.9E-06 | 9.390E-07 | 2.925E-07 |
| 2522 | G13B_A | E18B_T | V24B_N | G1B_A  | 4.8E-07 | 1.8E-06 | 9.390E-07 | 3.576E-07 |
| 2523 | Y10B_A | V7B_A  | F3B_A  | I20B_T | 4.6E-07 | 1.3E-06 | 9.395E-07 | 1.957E-07 |
| 2524 | G13B_A | V7B_A  | I20B_Q | T2B_A  | 5.2E-07 | 1.5E-06 | 9.395E-07 | 2.993E-07 |
| 2525 | G13B_A | V7B_A  | I20B_N | E18B_A | 5.2E-07 | 1.4E-06 | 9.400E-07 | 2.314E-07 |
| 2526 | G13B_A | E18B_A | F19B_Q | V24B_Q | 4.2E-07 | 1.9E-06 | 9.405E-07 | 3.892E-07 |
| 2527 | G13B_A | I20B_Q | G1B_R  | T2B_A  | 3.5E-07 | 1.5E-06 | 9.405E-07 | 3.514E-07 |
| 2528 | S8B_A  | G13B_W | I20B_Q | Q14B_A | 5.4E-07 | 1.6E-06 | 9.415E-07 | 3.111E-07 |
| 2529 | Y10B_A | I20B_T | S9B_A  | Q14B_A | 5.5E-07 | 1.4E-06 | 9.415E-07 | 2.379E-07 |
| 2530 | G13B_A | S8B_A  | I20B_Q | E18B_A | 4.7E-07 | 1.9E-06 | 9.420E-07 | 3.204E-07 |
| 2531 | Y10B_A | F3B_A  | I20B_T | G1B_R  | 6.9E-07 | 1.2E-06 | 9.420E-07 | 1.537E-07 |
| 2532 | G13B_A | E18B_T | F19B_A | V24B_Q | 4.9E-07 | 1.7E-06 | 9.420E-07 | 3.343E-07 |
| 2533 | G13B_A | I20B_N | K17B_A | S9B_A  | 5.8E-07 | 1.4E-06 | 9.425E-07 | 2.365E-07 |
| 2534 | Y10B_A | G13B_W | F19B_Q | K17B_S | 3.0E-07 | 1.8E-06 | 9.430E-07 | 3.824E-07 |
| 2535 | G13B_A | A16B_N | E18B_T | L23B_Q | 2.5E-07 | 1.8E-06 | 9.430E-07 | 4.318E-07 |
| 2536 | G13B_A | Y10B_A | A16B_N | I20B_Q | 3.2E-07 | 1.7E-06 | 9.435E-07 | 4.070E-07 |
| 2537 | G13B_A | L11B_A | F19B_Q | L23B_Q | 3.9E-07 | 1.5E-06 | 9.435E-07 | 3.264E-07 |
| 2538 | G13B_A | L23B_R | V24B_T | T2B_A  | 6.1E-07 | 1.4E-06 | 9.435E-07 | 2.338E-07 |
| 2539 | G13B_A | L11B_A | F19B_W | V24B_Q | 4.7E-07 | 1.5E-06 | 9.440E-07 | 2.638E-07 |
| 2540 | S8B_A  | D6B_A  | I20B_N | E12B_A | 4.8E-07 | 1.7E-06 | 9.440E-07 | 3.471E-07 |
| 2541 | Y10B_A | A16B_N | I20B_S | G1B_A  | 2.2E-07 | 1.7E-06 | 9.440E-07 | 5.198E-07 |
| 2542 | G13B_A | D6B_A  | I20B_T | E18B_A | 6.5E-07 | 1.4E-06 | 9.445E-07 | 2.006E-07 |
| 2543 | G13B_A | S8B_A  | L11B_A | I20B_Q | 5.6E-07 | 1.4E-06 | 9.445E-07 | 2.765E-07 |
| 2544 | Y10B_A | L11B_A | L23B_R | V24B_T | 5.4E-07 | 1.7E-06 | 9.445E-07 | 2.971E-07 |
| 2545 | G13B_A | L11B_A | K17B_S | V24B_Q | 4.4E-07 | 1.4E-06 | 9.445E-07 | 2.769E-07 |
| 2546 | Y10B_A | E18B_T | F19B_W | V24B_Q | 5.1E-07 | 1.8E-06 | 9.450E-07 | 3.543E-07 |
| 2547 | G13B_A | F19B_Q | V24B_Q | T2B_A  | 2.5E-07 | 1.5E-06 | 9.450E-07 | 3.699E-07 |

|      |        |        |        |        |         |         |           |           |
|------|--------|--------|--------|--------|---------|---------|-----------|-----------|
| 2548 | Y10B_A | S9B_A  | V24B_Q | E12B_A | 5.0E-07 | 1.5E-06 | 9.450E-07 | 2.945E-07 |
| 2549 | G13B_A | G1B_R  | S9B_A  | L23B_R | 4.4E-07 | 1.7E-06 | 9.450E-07 | 3.518E-07 |
| 2550 | G13B_A | G1B_R  | L23B_R | K17B_S | 4.5E-07 | 1.9E-06 | 9.455E-07 | 3.893E-07 |
| 2551 | G13B_A | F3B_A  | I20B_T | Q14B_A | 6.3E-07 | 1.7E-06 | 9.460E-07 | 2.392E-07 |
| 2552 | G13B_A | G1B_R  | F19B_Q | K17B_S | 4.1E-07 | 1.6E-06 | 9.460E-07 | 3.196E-07 |
| 2553 | G13B_A | G1B_R  | S9B_A  | V24B_T | 7.3E-07 | 1.4E-06 | 9.465E-07 | 1.771E-07 |
| 2554 | Y10B_A | G1B_R  | L23B_R | V24B_N | 3.9E-07 | 1.3E-06 | 9.470E-07 | 2.121E-07 |
| 2555 | G13B_A | I20B_T | G1B_R  | Q14B_A | 4.3E-07 | 1.5E-06 | 9.470E-07 | 2.931E-07 |
| 2556 | Y10B_A | G13B_W | I20B_N | S5B_A  | 5.4E-07 | 1.6E-06 | 9.470E-07 | 2.922E-07 |
| 2557 | Y10B_A | I20B_N | S5B_A  | S9B_A  | 4.7E-07 | 1.8E-06 | 9.475E-07 | 3.641E-07 |
| 2558 | Y10B_A | D6B_A  | L23B_Q | V24B_Q | 5.9E-07 | 1.7E-06 | 9.475E-07 | 2.600E-07 |
| 2559 | G13B_A | V7B_A  | F19B_W | V24B_Q | 5.3E-07 | 1.5E-06 | 9.480E-07 | 3.090E-07 |
| 2560 | G13B_A | I20B_S | G1B_R  | Q14B_A | 5.9E-07 | 1.5E-06 | 9.485E-07 | 2.308E-07 |
| 2561 | G13B_A | K17B_S | F19B_A | V24B_T | 3.6E-07 | 2.0E-06 | 9.485E-07 | 4.087E-07 |
| 2562 | Y10B_A | E18B_T | I20B_S | S5B_A  | 5.5E-07 | 1.8E-06 | 9.490E-07 | 3.129E-07 |
| 2563 | G13B_A | E18B_A | F19B_Q | V24B_T | 3.6E-07 | 1.6E-06 | 9.490E-07 | 4.087E-07 |
| 2564 | S8B_A  | G13B_W | I20B_Q | T4B_A  | 3.7E-07 | 2.1E-06 | 9.490E-07 | 4.475E-07 |
| 2565 | S8B_A  | G13B_W | I20B_T | Q14B_A | 4.4E-07 | 1.6E-06 | 9.495E-07 | 3.174E-07 |
| 2566 | Y10B_A | G13B_W | I20B_N | Q14B_A | 5.4E-07 | 1.4E-06 | 9.495E-07 | 2.508E-07 |
| 2567 | G13B_A | L11B_A | I20B_Q | Q14B_A | 4.4E-07 | 1.6E-06 | 9.500E-07 | 2.861E-07 |
| 2568 | Y10B_A | V7B_A  | F19B_Q | V24B_N | 4.4E-07 | 2.0E-06 | 9.500E-07 | 3.587E-07 |
| 2569 | G13B_A | F3B_A  | S9B_A  | L23B_R | 6.0E-07 | 1.4E-06 | 9.500E-07 | 2.208E-07 |
| 2570 | S8B_A  | G13B_W | I20B_N | T4B_A  | 5.2E-07 | 1.4E-06 | 9.500E-07 | 2.708E-07 |
| 2571 | G13B_A | T4B_A  | L23B_R | V24B_Q | 5.6E-07 | 1.7E-06 | 9.505E-07 | 2.836E-07 |
| 2572 | G13B_A | I20B_N | G1B_R  | T2B_A  | 5.1E-07 | 1.5E-06 | 9.505E-07 | 2.810E-07 |
| 2573 | G13B_A | Y10B_A | F3B_A  | I20B_N | 5.4E-07 | 1.6E-06 | 9.505E-07 | 2.951E-07 |
| 2574 | G13B_A | I20B_Q | Q14B_A | G1B_A  | 5.4E-07 | 1.6E-06 | 9.510E-07 | 3.164E-07 |
| 2575 | G13B_A | F3B_A  | I20B_S | E18B_A | 5.8E-07 | 1.4E-06 | 9.510E-07 | 2.189E-07 |
| 2576 | G13B_A | S8B_A  | L23B_Q | V24B_N | 4.7E-07 | 1.9E-06 | 9.510E-07 | 3.709E-07 |
| 2577 | Y10B_A | S8B_A  | I20B_Q | F19B_W | 4.1E-07 | 1.7E-06 | 9.520E-07 | 3.907E-07 |
| 2578 | G13B_A | E18B_T | G1B_R  | L23B_R | 4.8E-07 | 1.8E-06 | 9.525E-07 | 3.680E-07 |
| 2579 | Y10B_A | A16B_N | I20B_Q | F19B_A | 2.8E-07 | 2.7E-06 | 9.530E-07 | 4.948E-07 |
| 2580 | Y10B_A | A16B_N | I20B_S | F19B_A | 1.9E-07 | 2.2E-06 | 9.540E-07 | 5.471E-07 |
| 2581 | Y10B_A | E18B_T | S9B_A  | V24B_T | 3.4E-07 | 2.0E-06 | 9.545E-07 | 3.797E-07 |
| 2582 | G13B_A | S9B_A  | L23B_R | G1B_A  | 4.8E-07 | 1.6E-06 | 9.550E-07 | 2.713E-07 |
| 2583 | G13B_A | G1B_R  | F19B_W | V24B_Q | 4.2E-07 | 1.6E-06 | 9.555E-07 | 3.011E-07 |
| 2584 | G13B_A | E18B_A | S9B_A  | V24B_N | 5.2E-07 | 1.3E-06 | 9.560E-07 | 2.268E-07 |
| 2585 | Y10B_A | L23B_R | F19B_A | V24B_N | 4.4E-07 | 1.7E-06 | 9.565E-07 | 2.920E-07 |
| 2586 | G13B_A | I20B_N | F19B_A | T2B_A  | 3.1E-07 | 1.9E-06 | 9.565E-07 | 3.348E-07 |
| 2587 | Y10B_A | G13B_W | S9B_A  | L23B_R | 5.4E-07 | 1.4E-06 | 9.575E-07 | 2.062E-07 |
| 2588 | G13B_A | I20B_N | K17B_A | E12B_A | 5.3E-07 | 1.5E-06 | 9.575E-07 | 2.596E-07 |
| 2589 | S8B_A  | G13B_W | I20B_S | S5B_A  | 5.4E-07 | 1.7E-06 | 9.575E-07 | 3.117E-07 |
| 2590 | Y10B_A | I20B_S | S5B_A  | E12B_A | 3.5E-07 | 1.4E-06 | 9.580E-07 | 2.602E-07 |
| 2591 | G13B_A | E18B_A | K17B_S | V24B_N | 5.8E-07 | 1.6E-06 | 9.580E-07 | 2.692E-07 |
| 2592 | G13B_A | F3B_A  | I20B_Q | S5B_A  | 4.6E-07 | 1.6E-06 | 9.580E-07 | 2.929E-07 |
| 2593 | Y10B_A | G13B_W | L23B_Q | K17B_S | 3.4E-07 | 1.8E-06 | 9.580E-07 | 3.702E-07 |
| 2594 | G13B_A | A16B_N | I20B_N | Q14B_A | 1.6E-07 | 2.0E-06 | 9.585E-07 | 5.391E-07 |
| 2595 | Y10B_A | G13B_W | I20B_N | T4B_A  | 5.6E-07 | 1.9E-06 | 9.590E-07 | 3.288E-07 |
| 2596 | Y10B_A | G13B_W | I20B_N | T2B_A  | 6.3E-07 | 1.4E-06 | 9.595E-07 | 2.308E-07 |
| 2597 | G13B_A | G1B_R  | F19B_W | V24B_T | 5.1E-07 | 1.6E-06 | 9.600E-07 | 2.821E-07 |
| 2598 | Y10B_A | L11B_A | I20B_S | F19B_A | 5.5E-07 | 2.0E-06 | 9.600E-07 | 3.217E-07 |
| 2599 | G13B_A | I20B_T | G1B_R  | S5B_A  | 5.9E-07 | 1.5E-06 | 9.610E-07 | 2.805E-07 |

|      |        |        |        |        |         |         |           |           |
|------|--------|--------|--------|--------|---------|---------|-----------|-----------|
| 2600 | G13B_A | I20B_Q | G1B_R  | Q14B_A | 5.2E-07 | 1.6E-06 | 9.615E-07 | 2.831E-07 |
| 2601 | G13B_A | I20B_N | L11B_A | T2B_A  | 6.3E-07 | 1.4E-06 | 9.615E-07 | 2.701E-07 |
| 2602 | Y10B_A | S9B_A  | L23B_Q | E12B_A | 4.8E-07 | 1.6E-06 | 9.620E-07 | 3.172E-07 |
| 2603 | G13B_A | S8B_A  | I20B_T | F19B_A | 6.2E-07 | 1.7E-06 | 9.620E-07 | 2.831E-07 |
| 2604 | G13B_A | A16B_N | I20B_T | S5B_A  | 2.0E-07 | 1.6E-06 | 9.625E-07 | 3.683E-07 |
| 2605 | Y10B_A | G13B_W | A16B_N | V24B_Q | 2.5E-07 | 1.8E-06 | 9.625E-07 | 4.669E-07 |
| 2606 | G13B_A | Y10B_A | I20B_S | G1B_R  | 5.9E-07 | 1.5E-06 | 9.625E-07 | 2.510E-07 |
| 2607 | G13B_A | Y10B_A | I20B_Q | F19B_A | 2.6E-07 | 1.8E-06 | 9.635E-07 | 3.838E-07 |
| 2608 | G13B_A | S8B_A  | L23B_R | V24B_Q | 4.4E-07 | 1.6E-06 | 9.635E-07 | 3.265E-07 |
| 2609 | Y10B_A | S9B_A  | K17B_S | V24B_T | 5.3E-07 | 1.9E-06 | 9.635E-07 | 3.473E-07 |
| 2610 | G13B_A | I20B_S | F19B_A | T2B_A  | 5.4E-07 | 1.6E-06 | 9.640E-07 | 2.841E-07 |
| 2611 | Y10B_A | E18B_T | I20B_T | S5B_A  | 4.7E-07 | 2.2E-06 | 9.640E-07 | 4.117E-07 |
| 2612 | G13B_A | I20B_Q | F19B_A | Q14B_A | 3.6E-07 | 1.6E-06 | 9.640E-07 | 4.036E-07 |
| 2613 | G13B_A | D6B_A  | I20B_T | L11B_A | 5.2E-07 | 1.3E-06 | 9.640E-07 | 2.383E-07 |
| 2614 | Y10B_A | F19B_Q | V24B_T | G1B_A  | 4.3E-07 | 1.6E-06 | 9.645E-07 | 2.994E-07 |
| 2615 | Y10B_A | A16B_N | I20B_N | L11B_A | 1.9E-07 | 2.1E-06 | 9.650E-07 | 5.704E-07 |
| 2616 | Y10B_A | F19B_W | S9B_A  | V24B_T | 4.8E-07 | 1.3E-06 | 9.650E-07 | 2.413E-07 |
| 2617 | G13B_A | D6B_A  | F19B_Q | V24B_N | 4.8E-07 | 1.6E-06 | 9.650E-07 | 3.287E-07 |
| 2618 | G13B_A | L23B_Q | V24B_Q | Q14B_A | 4.9E-07 | 2.0E-06 | 9.655E-07 | 3.238E-07 |
| 2619 | G13B_A | I20B_Q | E18B_A | S5B_A  | 5.8E-07 | 1.8E-06 | 9.660E-07 | 3.288E-07 |
| 2620 | Y10B_A | G13B_W | V24B_T | E12B_A | 6.4E-07 | 1.4E-06 | 9.660E-07 | 2.079E-07 |
| 2621 | G13B_A | I20B_T | K17B_A | E12B_A | 4.5E-07 | 2.0E-06 | 9.665E-07 | 3.246E-07 |
| 2622 | Y10B_A | G13B_W | L23B_Q | E12B_A | 5.3E-07 | 1.5E-06 | 9.670E-07 | 3.077E-07 |
| 2623 | Y10B_A | F3B_A  | I20B_N | G1B_R  | 5.0E-07 | 1.6E-06 | 9.670E-07 | 2.803E-07 |
| 2624 | G13B_A | F19B_W | S9B_A  | L23B_R | 6.6E-07 | 1.6E-06 | 9.670E-07 | 2.430E-07 |
| 2625 | S8B_A  | G13B_W | F19B_Q | E12B_A | 4.2E-07 | 2.1E-06 | 9.675E-07 | 4.432E-07 |
| 2626 | Y10B_A | F3B_A  | I20B_Q | F19B_A | 3.8E-07 | 2.0E-06 | 9.675E-07 | 4.230E-07 |
| 2627 | G13B_A | S8B_A  | I20B_N | F19B_A | 6.7E-07 | 1.4E-06 | 9.680E-07 | 2.596E-07 |
| 2628 | Y10B_A | V7B_A  | I20B_N | G1B_R  | 4.8E-07 | 1.8E-06 | 9.680E-07 | 3.167E-07 |
| 2629 | Y10B_A | A16B_N | F19B_Q | V24B_T | 2.4E-07 | 1.7E-06 | 9.685E-07 | 4.583E-07 |
| 2630 | Y10B_A | F19B_W | S9B_A  | V24B_N | 5.7E-07 | 1.5E-06 | 9.685E-07 | 2.756E-07 |
| 2631 | G13B_A | I20B_N | L11B_A | Q14B_A | 4.6E-07 | 1.6E-06 | 9.690E-07 | 2.842E-07 |
| 2632 | Y10B_A | I20B_N | F19B_W | T2B_A  | 4.7E-07 | 1.6E-06 | 9.690E-07 | 3.417E-07 |
| 2633 | G13B_A | S8B_A  | F3B_A  | I20B_Q | 4.4E-07 | 1.5E-06 | 9.700E-07 | 3.212E-07 |
| 2634 | Y10B_A | I20B_N | E18B_T | T4B_A  | 3.6E-07 | 1.5E-06 | 9.700E-07 | 3.915E-07 |
| 2635 | Y10B_A | I20B_Q | S9B_A  | Q14B_A | 5.2E-07 | 1.7E-06 | 9.700E-07 | 3.139E-07 |
| 2636 | Y10B_A | G1B_R  | F19B_Q | V24B_N | 3.1E-07 | 1.4E-06 | 9.710E-07 | 2.977E-07 |
| 2637 | G13B_A | V7B_A  | I20B_S | E18B_A | 5.4E-07 | 1.4E-06 | 9.710E-07 | 2.443E-07 |
| 2638 | S8B_A  | V7B_A  | I20B_N | G1B_R  | 5.9E-07 | 1.5E-06 | 9.720E-07 | 2.401E-07 |
| 2639 | G13B_A | E18B_A | F19B_W | V24B_Q | 5.2E-07 | 2.1E-06 | 9.725E-07 | 3.305E-07 |
| 2640 | S8B_A  | G13B_W | I20B_N | S5B_A  | 5.4E-07 | 1.6E-06 | 9.730E-07 | 3.238E-07 |
| 2641 | G13B_A | L23B_Q | Q14B_A | V24B_N | 5.1E-07 | 1.4E-06 | 9.735E-07 | 2.729E-07 |
| 2642 | G13B_A | S8B_A  | I20B_N | G1B_R  | 5.9E-07 | 1.6E-06 | 9.740E-07 | 3.259E-07 |
| 2643 | G13B_A | Y10B_A | V7B_A  | I20B_S | 5.6E-07 | 1.3E-06 | 9.740E-07 | 2.388E-07 |
| 2644 | Y10B_A | V7B_A  | F19B_Q | V24B_Q | 5.2E-07 | 1.9E-06 | 9.750E-07 | 3.539E-07 |
| 2645 | Y10B_A | I20B_Q | E18B_A | G1B_R  | 3.8E-07 | 1.6E-06 | 9.750E-07 | 3.472E-07 |
| 2646 | G13B_A | F3B_A  | I20B_N | T4B_A  | 5.5E-07 | 1.6E-06 | 9.750E-07 | 3.145E-07 |
| 2647 | Y10B_A | I20B_S | T4B_A  | S9B_A  | 6.2E-07 | 1.5E-06 | 9.750E-07 | 2.268E-07 |
| 2648 | Y10B_A | F3B_A  | I20B_S | F19B_A | 4.4E-07 | 1.4E-06 | 9.755E-07 | 2.848E-07 |
| 2649 | Y10B_A | I20B_T | L11B_A | F19B_A | 5.2E-07 | 1.6E-06 | 9.755E-07 | 2.910E-07 |
| 2650 | Y10B_A | F19B_W | V24B_Q | E12B_A | 6.0E-07 | 1.7E-06 | 9.755E-07 | 2.976E-07 |
| 2651 | G13B_A | I20B_N | L11B_A | E18B_A | 5.2E-07 | 1.4E-06 | 9.760E-07 | 2.415E-07 |

|      |        |        |        |        |         |         |           |           |
|------|--------|--------|--------|--------|---------|---------|-----------|-----------|
| 2652 | Y10B_A | I20B_S | T2B_A  | E12B_A | 6.2E-07 | 1.4E-06 | 9.760E-07 | 1.969E-07 |
| 2653 | G13B_A | I20B_T | T4B_A  | F19B_A | 5.7E-07 | 1.5E-06 | 9.765E-07 | 2.527E-07 |
| 2654 | Y10B_A | F3B_A  | L23B_R | V24B_N | 5.1E-07 | 1.6E-06 | 9.765E-07 | 2.686E-07 |
| 2655 | G13B_A | A16B_N | L23B_Q | K17B_S | 2.4E-07 | 1.9E-06 | 9.765E-07 | 4.875E-07 |
| 2656 | G13B_A | G1B_R  | V24B_Q | E12B_A | 3.5E-07 | 1.6E-06 | 9.765E-07 | 3.000E-07 |
| 2657 | Y10B_A | E18B_T | I20B_S | T2B_A  | 5.5E-07 | 2.2E-06 | 9.770E-07 | 4.019E-07 |
| 2658 | S8B_A  | V7B_A  | F3B_A  | I20B_T | 5.4E-07 | 1.7E-06 | 9.770E-07 | 2.803E-07 |
| 2659 | G13B_A | S8B_A  | I20B_S | F19B_A | 4.3E-07 | 1.5E-06 | 9.775E-07 | 2.940E-07 |
| 2660 | Y10B_A | F3B_A  | I20B_S | G1B_A  | 6.3E-07 | 1.3E-06 | 9.775E-07 | 2.293E-07 |
| 2661 | Y10B_A | L11B_A | F19B_Q | L23B_Q | 2.9E-07 | 1.7E-06 | 9.775E-07 | 3.869E-07 |
| 2662 | Y10B_A | I20B_N | E18B_A | F19B_A | 5.2E-07 | 1.5E-06 | 9.775E-07 | 3.136E-07 |
| 2663 | Y10B_A | I20B_N | L11B_A | F19B_A | 4.6E-07 | 1.4E-06 | 9.785E-07 | 3.420E-07 |
| 2664 | G13B_A | Y10B_A | A16B_N | I20B_T | 3.1E-07 | 1.6E-06 | 9.790E-07 | 4.168E-07 |
| 2665 | Y10B_A | F3B_A  | L23B_R | V24B_Q | 3.8E-07 | 1.6E-06 | 9.790E-07 | 3.453E-07 |
| 2666 | Y10B_A | E18B_A | L23B_Q | V24B_T | 5.1E-07 | 1.7E-06 | 9.790E-07 | 2.826E-07 |
| 2667 | Y10B_A | I20B_Q | K17B_A | S9B_A  | 4.3E-07 | 1.6E-06 | 9.795E-07 | 3.437E-07 |
| 2668 | G13B_A | V7B_A  | I20B_Q | Q14B_A | 5.6E-07 | 1.9E-06 | 9.800E-07 | 3.552E-07 |
| 2669 | G13B_A | E18B_A | K17B_S | V24B_Q | 4.7E-07 | 1.7E-06 | 9.800E-07 | 3.496E-07 |
| 2670 | G13B_A | F3B_A  | E18B_T | V24B_N | 3.4E-07 | 1.7E-06 | 9.810E-07 | 3.771E-07 |
| 2671 | G13B_A | S9B_A  | L23B_Q | F19B_A | 5.8E-07 | 1.7E-06 | 9.810E-07 | 3.354E-07 |
| 2672 | G13B_A | F3B_A  | E12B_A | V24B_N | 6.1E-07 | 1.4E-06 | 9.815E-07 | 2.448E-07 |
| 2673 | G13B_A | A16B_N | I20B_T | T4B_A  | 3.0E-07 | 2.0E-06 | 9.815E-07 | 4.565E-07 |
| 2674 | Y10B_A | E18B_T | L23B_R | E12B_A | 3.6E-07 | 1.6E-06 | 9.820E-07 | 3.816E-07 |
| 2675 | G13B_A | D6B_A  | I20B_N | E18B_A | 4.8E-07 | 1.4E-06 | 9.820E-07 | 2.588E-07 |
| 2676 | G13B_A | A16B_N | E18B_T | V24B_T | 2.1E-07 | 2.0E-06 | 9.825E-07 | 4.715E-07 |
| 2677 | G13B_A | S5B_A  | L23B_Q | V24B_T | 4.6E-07 | 1.5E-06 | 9.825E-07 | 2.561E-07 |
| 2678 | G13B_A | L23B_R | V24B_Q | Q14B_A | 3.7E-07 | 1.9E-06 | 9.830E-07 | 3.877E-07 |
| 2679 | Y10B_A | S8B_A  | I20B_N | S9B_A  | 5.5E-07 | 1.4E-06 | 9.835E-07 | 2.626E-07 |
| 2680 | G13B_A | S5B_A  | L23B_Q | V24B_Q | 3.4E-07 | 1.7E-06 | 9.835E-07 | 3.798E-07 |
| 2681 | S8B_A  | D6B_A  | L11B_A | I20B_Q | 5.8E-07 | 1.5E-06 | 9.835E-07 | 2.928E-07 |
| 2682 | Y10B_A | I20B_N | T4B_A  | S9B_A  | 6.4E-07 | 1.4E-06 | 9.840E-07 | 2.503E-07 |
| 2683 | Y10B_A | D6B_A  | I20B_S | G1B_R  | 4.1E-07 | 1.7E-06 | 9.845E-07 | 3.163E-07 |
| 2684 | G13B_A | I20B_N | S5B_A  | F19B_A | 4.0E-07 | 1.4E-06 | 9.845E-07 | 2.934E-07 |
| 2685 | G13B_A | F3B_A  | S9B_A  | V24B_T | 7.0E-07 | 1.6E-06 | 9.845E-07 | 2.320E-07 |
| 2686 | Y10B_A | I20B_T | Q14B_A | E12B_A | 5.0E-07 | 1.6E-06 | 9.850E-07 | 2.690E-07 |
| 2687 | Y10B_A | L11B_A | L23B_Q | V24B_N | 4.4E-07 | 2.4E-06 | 9.855E-07 | 4.667E-07 |
| 2688 | Y10B_A | I20B_Q | K17B_A | F19B_W | 5.8E-07 | 1.6E-06 | 9.855E-07 | 2.897E-07 |
| 2689 | G13B_A | G1B_R  | F19B_Q | S9B_A  | 5.0E-07 | 1.5E-06 | 9.855E-07 | 2.782E-07 |
| 2690 | Y10B_A | F3B_A  | L11B_A | I20B_Q | 3.0E-07 | 1.5E-06 | 9.855E-07 | 3.116E-07 |
| 2691 | Y10B_A | F3B_A  | I20B_N | G1B_A  | 6.3E-07 | 1.7E-06 | 9.865E-07 | 2.747E-07 |
| 2692 | G13B_A | L11B_A | F19B_Q | K17B_S | 3.7E-07 | 2.0E-06 | 9.865E-07 | 4.831E-07 |
| 2693 | S8B_A  | D6B_A  | I20B_T | G1B_R  | 6.4E-07 | 1.7E-06 | 9.870E-07 | 2.684E-07 |
| 2694 | Y10B_A | G13B_W | I20B_T | T4B_A  | 5.4E-07 | 1.6E-06 | 9.870E-07 | 2.830E-07 |
| 2695 | G13B_A | D6B_A  | L23B_Q | K17B_S | 5.1E-07 | 1.7E-06 | 9.875E-07 | 3.150E-07 |
| 2696 | G13B_A | T4B_A  | F19B_Q | V24B_T | 4.6E-07 | 1.7E-06 | 9.875E-07 | 3.255E-07 |
| 2697 | G13B_A | S8B_A  | I20B_Q | G1B_A  | 5.2E-07 | 1.7E-06 | 9.885E-07 | 3.477E-07 |
| 2698 | Y10B_A | G13B_W | F19B_W | V24B_N | 4.0E-07 | 1.8E-06 | 9.885E-07 | 3.624E-07 |
| 2699 | S8B_A  | V7B_A  | I20B_N | G1B_A  | 6.3E-07 | 1.5E-06 | 9.889E-07 | 2.986E-07 |
| 2700 | Y10B_A | V7B_A  | I20B_Q | G1B_A  | 4.9E-07 | 1.8E-06 | 9.890E-07 | 3.787E-07 |
| 2701 | S8B_A  | D6B_A  | I20B_N | G1B_R  | 4.6E-07 | 1.9E-06 | 9.890E-07 | 4.026E-07 |
| 2702 | G13B_A | V7B_A  | I20B_N | S5B_A  | 6.4E-07 | 1.3E-06 | 9.890E-07 | 2.385E-07 |
| 2703 | Y10B_A | V7B_A  | I20B_T | F19B_A | 5.2E-07 | 1.8E-06 | 9.895E-07 | 3.275E-07 |

|      |        |        |        |        |         |         |           |           |
|------|--------|--------|--------|--------|---------|---------|-----------|-----------|
| 2704 | S8B_A  | D6B_A  | L23B_Q | V24B_T | 4.7E-07 | 1.6E-06 | 9.895E-07 | 3.141E-07 |
| 2705 | G13B_A | L23B_R | Q14B_A | V24B_N | 4.4E-07 | 1.6E-06 | 9.900E-07 | 2.534E-07 |
| 2706 | G13B_A | L23B_Q | V24B_T | Q14B_A | 5.0E-07 | 1.6E-06 | 9.900E-07 | 2.746E-07 |
| 2707 | Y10B_A | I20B_S | S5B_A  | S9B_A  | 5.5E-07 | 1.4E-06 | 9.900E-07 | 2.380E-07 |
| 2708 | S8B_A  | G13B_W | I20B_T | T2B_A  | 4.9E-07 | 1.7E-06 | 9.900E-07 | 3.395E-07 |
| 2709 | G13B_A | L11B_A | F19B_Q | V24B_T | 4.3E-07 | 2.5E-06 | 9.900E-07 | 4.977E-07 |
| 2710 | G13B_A | S8B_A  | F19B_Q | V24B_T | 2.8E-07 | 1.9E-06 | 9.905E-07 | 4.767E-07 |
| 2711 | G13B_A | Y10B_A | I20B_T | L11B_A | 7.4E-07 | 1.4E-06 | 9.910E-07 | 1.794E-07 |
| 2712 | G13B_A | V7B_A  | S9B_A  | V24B_N | 5.7E-07 | 1.6E-06 | 9.910E-07 | 2.719E-07 |
| 2713 | Y10B_A | I20B_T | G1B_R  | F19B_A | 5.7E-07 | 1.6E-06 | 9.910E-07 | 2.934E-07 |
| 2714 | G13B_A | E18B_T | F19B_A | V24B_N | 4.1E-07 | 1.7E-06 | 9.920E-07 | 3.656E-07 |
| 2715 | G13B_A | V7B_A  | K17B_S | V24B_Q | 3.0E-07 | 1.5E-06 | 9.925E-07 | 3.039E-07 |
| 2716 | G13B_A | F3B_A  | I20B_S | S5B_A  | 5.2E-07 | 1.4E-06 | 9.935E-07 | 2.468E-07 |
| 2717 | G13B_A | I20B_T | L11B_A | Q14B_A | 6.3E-07 | 1.9E-06 | 9.935E-07 | 3.158E-07 |
| 2718 | G13B_A | E18B_T | K17B_S | E12B_A | 5.1E-07 | 2.5E-06 | 9.935E-07 | 4.624E-07 |
| 2719 | Y10B_A | L23B_R | V24B_Q | G1B_A  | 4.6E-07 | 1.4E-06 | 9.935E-07 | 2.780E-07 |
| 2720 | G13B_A | D6B_A  | F19B_W | L23B_Q | 5.8E-07 | 2.0E-06 | 9.940E-07 | 3.703E-07 |
| 2721 | G13B_A | I20B_S | F19B_A | Q14B_A | 6.4E-07 | 1.7E-06 | 9.940E-07 | 3.191E-07 |
| 2722 | G13B_A | Y10B_A | I20B_N | L11B_A | 5.4E-07 | 1.4E-06 | 9.945E-07 | 2.552E-07 |
| 2723 | G13B_A | F19B_W | K17B_S | E12B_A | 6.0E-07 | 1.5E-06 | 9.945E-07 | 2.433E-07 |
| 2724 | Y10B_A | I20B_T | S5B_A  | E12B_A | 4.8E-07 | 1.9E-06 | 9.945E-07 | 3.473E-07 |
| 2725 | Y10B_A | D6B_A  | F19B_Q | V24B_Q | 5.8E-07 | 1.7E-06 | 9.950E-07 | 3.338E-07 |
| 2726 | G13B_A | G1B_R  | K17B_S | V24B_T | 4.0E-07 | 1.7E-06 | 9.950E-07 | 2.733E-07 |
| 2727 | G13B_A | I20B_T | K17B_A | F19B_W | 5.1E-07 | 1.5E-06 | 9.955E-07 | 2.935E-07 |
| 2728 | Y10B_A | I20B_T | L11B_A | E18B_A | 5.5E-07 | 1.4E-06 | 9.955E-07 | 2.379E-07 |
| 2729 | Y10B_A | V7B_A  | F19B_Q | V24B_T | 4.6E-07 | 1.8E-06 | 9.965E-07 | 3.648E-07 |
| 2730 | G13B_A | D6B_A  | F19B_Q | V24B_T | 5.8E-07 | 1.6E-06 | 9.965E-07 | 2.676E-07 |
| 2731 | Y10B_A | A16B_N | I20B_T | F19B_A | 1.7E-07 | 2.4E-06 | 9.970E-07 | 5.355E-07 |
| 2732 | S8B_A  | D6B_A  | F3B_A  | I20B_N | 5.8E-07 | 1.5E-06 | 9.980E-07 | 2.354E-07 |
| 2733 | G13B_A | I20B_N | T4B_A  | G1B_A  | 5.0E-07 | 1.6E-06 | 9.980E-07 | 3.015E-07 |
| 2734 | G13B_A | S8B_A  | V7B_A  | I20B_N | 5.6E-07 | 1.4E-06 | 9.985E-07 | 2.457E-07 |
| 2735 | Y10B_A | E18B_T | S9B_A  | L23B_R | 4.7E-07 | 1.5E-06 | 9.985E-07 | 3.049E-07 |
| 2736 | G13B_A | A16B_N | I20B_Q | Q14B_A | 2.2E-07 | 2.1E-06 | 9.995E-07 | 4.675E-07 |
| 2737 | G13B_A | I20B_N | L11B_A | S5B_A  | 5.8E-07 | 1.6E-06 | 9.995E-07 | 2.509E-07 |
| 2738 | Y10B_A | G1B_R  | K17B_S | V24B_T | 7.4E-07 | 1.3E-06 | 9.995E-07 | 2.111E-07 |
| 2739 | G13B_A | I20B_T | S5B_A  | F19B_A | 5.2E-07 | 1.8E-06 | 1.000E-06 | 2.755E-07 |
| 2740 | Y10B_A | E18B_T | L23B_Q | E12B_A | 6.4E-07 | 1.6E-06 | 1.001E-06 | 2.602E-07 |
| 2741 | Y10B_A | I20B_N | F19B_A | G1B_A  | 5.5E-07 | 2.0E-06 | 1.001E-06 | 3.276E-07 |
| 2742 | G13B_A | E18B_T | L23B_R | F19B_A | 4.7E-07 | 2.0E-06 | 1.001E-06 | 4.038E-07 |
| 2743 | G13B_A | L11B_A | K17B_S | V24B_T | 5.4E-07 | 1.8E-06 | 1.001E-06 | 3.021E-07 |
| 2744 | Y10B_A | L11B_A | I20B_Q | G1B_A  | 6.3E-07 | 1.4E-06 | 1.001E-06 | 2.686E-07 |
| 2745 | S8B_A  | G13B_W | E18B_T | F19B_Q | 5.6E-07 | 1.7E-06 | 1.001E-06 | 3.281E-07 |
| 2746 | Y10B_A | D6B_A  | F3B_A  | I20B_S | 5.4E-07 | 1.4E-06 | 1.001E-06 | 2.364E-07 |
| 2747 | G13B_A | S9B_A  | F19B_A | V24B_Q | 7.5E-07 | 2.1E-06 | 1.002E-06 | 2.910E-07 |
| 2748 | G13B_A | E18B_A | S9B_A  | L23B_Q | 4.7E-07 | 1.7E-06 | 1.002E-06 | 3.349E-07 |
| 2749 | S8B_A  | G13B_W | E18B_T | V24B_T | 6.0E-07 | 1.5E-06 | 1.002E-06 | 2.466E-07 |
| 2750 | Y10B_A | A16B_N | I20B_T | T2B_A  | 2.6E-07 | 2.1E-06 | 1.002E-06 | 4.889E-07 |
| 2751 | G13B_A | F3B_A  | E18B_T | L23B_Q | 6.1E-07 | 1.7E-06 | 1.002E-06 | 3.030E-07 |
| 2752 | Y10B_A | I20B_S | Q14B_A | E12B_A | 5.9E-07 | 1.5E-06 | 1.003E-06 | 2.898E-07 |
| 2753 | G13B_A | S8B_A  | A16B_N | I20B_N | 3.1E-07 | 2.1E-06 | 1.003E-06 | 4.905E-07 |
| 2754 | G13B_A | S9B_A  | F19B_A | V24B_T | 6.7E-07 | 1.4E-06 | 1.004E-06 | 2.206E-07 |
| 2755 | G13B_A | I20B_T | G1B_R  | T4B_A  | 5.9E-07 | 1.4E-06 | 1.004E-06 | 2.086E-07 |

|      |        |        |        |        |         |         |           |           |
|------|--------|--------|--------|--------|---------|---------|-----------|-----------|
| 2756 | G13B_A | Y10B_A | F19B_Q | V24B_N | 4.8E-07 | 2.3E-06 | 1.004E-06 | 4.330E-07 |
| 2757 | G13B_A | A16B_N | E12B_A | V24B_N | 3.6E-07 | 2.0E-06 | 1.004E-06 | 4.022E-07 |
| 2758 | Y10B_A | I20B_N | T2B_A  | E12B_A | 6.2E-07 | 1.8E-06 | 1.005E-06 | 3.428E-07 |
| 2759 | S8B_A  | V7B_A  | F3B_A  | I20B_N | 4.6E-07 | 1.6E-06 | 1.005E-06 | 3.566E-07 |
| 2760 | S8B_A  | G13B_W | F19B_Q | S9B_A  | 4.8E-07 | 1.7E-06 | 1.005E-06 | 3.114E-07 |
| 2761 | Y10B_A | A16B_N | I20B_N | G1B_R  | 2.6E-07 | 2.1E-06 | 1.006E-06 | 5.054E-07 |
| 2762 | Y10B_A | V7B_A  | I20B_T | L11B_A | 5.2E-07 | 1.7E-06 | 1.006E-06 | 2.959E-07 |
| 2763 | S8B_A  | V7B_A  | A16B_N | I20B_N | 2.2E-07 | 2.0E-06 | 1.007E-06 | 4.988E-07 |
| 2764 | G13B_A | F19B_W | L23B_R | E12B_A | 6.0E-07 | 1.6E-06 | 1.007E-06 | 3.019E-07 |
| 2765 | Y10B_A | S9B_A  | L23B_R | E12B_A | 5.0E-07 | 1.8E-06 | 1.007E-06 | 3.434E-07 |
| 2766 | Y10B_A | G1B_R  | L23B_R | V24B_T | 5.0E-07 | 1.9E-06 | 1.008E-06 | 3.414E-07 |
| 2767 | G13B_A | I20B_S | Q14B_A | G1B_A  | 5.4E-07 | 1.6E-06 | 1.009E-06 | 3.060E-07 |
| 2768 | Y10B_A | V7B_A  | F3B_A  | I20B_N | 5.1E-07 | 1.4E-06 | 1.010E-06 | 2.646E-07 |
| 2769 | G13B_A | L11B_A | E12B_A | V24B_N | 5.8E-07 | 1.7E-06 | 1.010E-06 | 2.916E-07 |
| 2770 | G13B_A | V7B_A  | F19B_W | V24B_N | 4.7E-07 | 2.6E-06 | 1.010E-06 | 4.443E-07 |
| 2771 | G13B_A | Y10B_A | F19B_Q | V24B_Q | 3.2E-07 | 1.9E-06 | 1.010E-06 | 4.155E-07 |
| 2772 | S8B_A  | D6B_A  | L23B_R | V24B_N | 4.0E-07 | 1.7E-06 | 1.011E-06 | 3.466E-07 |
| 2773 | G13B_A | V7B_A  | E18B_T | V24B_T | 4.9E-07 | 1.6E-06 | 1.011E-06 | 3.523E-07 |
| 2774 | G13B_A | F3B_A  | F19B_Q | V24B_T | 3.5E-07 | 1.7E-06 | 1.011E-06 | 4.255E-07 |
| 2775 | G13B_A | S5B_A  | L23B_R | V24B_T | 6.0E-07 | 1.7E-06 | 1.011E-06 | 2.738E-07 |
| 2776 | Y10B_A | G1B_R  | K17B_S | V24B_Q | 4.3E-07 | 1.7E-06 | 1.013E-06 | 3.567E-07 |
| 2777 | G13B_A | I20B_S | K17B_A | F19B_W | 5.2E-07 | 1.8E-06 | 1.013E-06 | 3.323E-07 |
| 2778 | G13B_A | I20B_Q | K17B_A | E12B_A | 4.8E-07 | 1.8E-06 | 1.013E-06 | 3.727E-07 |
| 2779 | Y10B_A | A16B_N | I20B_Q | E18B_A | 3.9E-07 | 1.9E-06 | 1.013E-06 | 3.879E-07 |
| 2780 | G13B_A | F19B_Q | Q14B_A | V24B_N | 4.6E-07 | 1.8E-06 | 1.014E-06 | 4.051E-07 |
| 2781 | G13B_A | A16B_N | F19B_Q | V24B_T | 2.2E-07 | 1.6E-06 | 1.014E-06 | 4.040E-07 |
| 2782 | Y10B_A | V7B_A  | I20B_T | G1B_A  | 5.4E-07 | 1.9E-06 | 1.014E-06 | 3.375E-07 |
| 2783 | Y10B_A | E18B_A | F19B_Q | V24B_T | 3.2E-07 | 1.7E-06 | 1.014E-06 | 3.376E-07 |
| 2784 | G13B_A | L11B_A | I20B_Q | T2B_A  | 5.2E-07 | 1.4E-06 | 1.014E-06 | 2.606E-07 |
| 2785 | Y10B_A | V7B_A  | F3B_A  | I20B_S | 4.8E-07 | 1.7E-06 | 1.015E-06 | 3.481E-07 |
| 2786 | Y10B_A | G1B_R  | K17B_S | V24B_N | 3.9E-07 | 2.2E-06 | 1.015E-06 | 4.249E-07 |
| 2787 | G13B_A | A16B_N | E18B_T | L23B_R | 3.6E-07 | 2.1E-06 | 1.015E-06 | 4.687E-07 |
| 2788 | Y10B_A | I20B_S | S5B_A  | F19B_W | 4.4E-07 | 1.7E-06 | 1.015E-06 | 3.275E-07 |
| 2789 | G13B_A | L23B_Q | K17B_S | F19B_A | 4.6E-07 | 1.8E-06 | 1.015E-06 | 3.823E-07 |
| 2790 | G13B_A | D6B_A  | K17B_S | V24B_Q | 4.0E-07 | 2.4E-06 | 1.015E-06 | 4.548E-07 |
| 2791 | G13B_A | V24B_Q | E12B_A | G1B_A  | 6.0E-07 | 1.4E-06 | 1.015E-06 | 2.045E-07 |
| 2792 | Y10B_A | D6B_A  | F3B_A  | I20B_Q | 4.9E-07 | 2.0E-06 | 1.015E-06 | 3.729E-07 |
| 2793 | Y10B_A | F19B_W | V24B_T | E12B_A | 4.0E-07 | 1.5E-06 | 1.016E-06 | 2.956E-07 |
| 2794 | G13B_A | A16B_N | I20B_N | T4B_A  | 2.3E-07 | 2.0E-06 | 1.016E-06 | 5.274E-07 |
| 2795 | Y10B_A | I20B_N | F19B_W | T4B_A  | 5.2E-07 | 1.7E-06 | 1.016E-06 | 3.483E-07 |
| 2796 | S8B_A  | D6B_A  | V7B_A  | I20B_Q | 5.7E-07 | 1.8E-06 | 1.016E-06 | 3.296E-07 |
| 2797 | S8B_A  | D6B_A  | I20B_T | F19B_A | 5.6E-07 | 2.0E-06 | 1.016E-06 | 3.408E-07 |
| 2798 | S8B_A  | D6B_A  | L23B_R | V24B_T | 5.0E-07 | 1.4E-06 | 1.016E-06 | 2.810E-07 |
| 2799 | G13B_A | I20B_S | T4B_A  | F19B_A | 5.3E-07 | 1.8E-06 | 1.016E-06 | 3.247E-07 |
| 2800 | Y10B_A | G13B_W | I20B_S | T4B_A  | 6.3E-07 | 1.5E-06 | 1.017E-06 | 2.473E-07 |
| 2801 | G13B_A | I20B_T | L11B_A | T4B_A  | 5.6E-07 | 1.4E-06 | 1.017E-06 | 2.756E-07 |
| 2802 | G13B_A | G1B_R  | L23B_R | E12B_A | 6.3E-07 | 1.4E-06 | 1.017E-06 | 2.484E-07 |
| 2803 | G13B_A | I20B_N | S5B_A  | G1B_A  | 4.6E-07 | 1.6E-06 | 1.017E-06 | 2.747E-07 |
| 2804 | Y10B_A | V7B_A  | I20B_Q | F19B_A | 4.5E-07 | 2.2E-06 | 1.018E-06 | 3.898E-07 |
| 2805 | G13B_A | A16B_N | L23B_R | K17B_S | 4.0E-07 | 1.6E-06 | 1.018E-06 | 3.541E-07 |
| 2806 | G13B_A | D6B_A  | I20B_T | T2B_A  | 5.7E-07 | 1.5E-06 | 1.018E-06 | 2.437E-07 |
| 2807 | G13B_A | A16B_N | E18B_T | V24B_Q | 1.4E-07 | 1.8E-06 | 1.019E-06 | 4.911E-07 |

|      |        |        |        |        |         |         |           |           |
|------|--------|--------|--------|--------|---------|---------|-----------|-----------|
| 2808 | Y10B_A | V7B_A  | F3B_A  | I20B_Q | 6.3E-07 | 1.5E-06 | 1.019E-06 | 2.683E-07 |
| 2809 | G13B_A | I20B_T | E18B_A | S5B_A  | 6.7E-07 | 1.5E-06 | 1.019E-06 | 2.402E-07 |
| 2810 | Y10B_A | I20B_S | T4B_A  | E12B_A | 4.3E-07 | 1.5E-06 | 1.019E-06 | 2.535E-07 |
| 2811 | G13B_A | I20B_Q | T4B_A  | F19B_A | 5.8E-07 | 1.7E-06 | 1.019E-06 | 3.125E-07 |
| 2812 | G13B_A | Y10B_A | I20B_T | F19B_A | 5.4E-07 | 1.6E-06 | 1.019E-06 | 2.904E-07 |
| 2813 | G13B_A | V7B_A  | I20B_N | Q14B_A | 5.2E-07 | 1.5E-06 | 1.019E-06 | 2.808E-07 |
| 2814 | G13B_A | T4B_A  | L23B_Q | V24B_T | 5.2E-07 | 2.4E-06 | 1.019E-06 | 4.622E-07 |
| 2815 | Y10B_A | G13B_W | L23B_R | E12B_A | 4.7E-07 | 1.7E-06 | 1.019E-06 | 2.930E-07 |
| 2816 | Y10B_A | F3B_A  | I20B_T | L11B_A | 5.4E-07 | 1.5E-06 | 1.020E-06 | 2.581E-07 |
| 2817 | G13B_A | I20B_Q | E18B_A | T4B_A  | 5.5E-07 | 1.5E-06 | 1.020E-06 | 3.034E-07 |
| 2818 | G13B_A | F3B_A  | F19B_W | L23B_Q | 5.7E-07 | 2.0E-06 | 1.020E-06 | 3.078E-07 |
| 2819 | Y10B_A | G13B_W | F19B_Q | E12B_A | 4.9E-07 | 1.5E-06 | 1.021E-06 | 3.162E-07 |
| 2820 | Y10B_A | E18B_A | L23B_R | V24B_Q | 6.5E-07 | 1.8E-06 | 1.021E-06 | 2.892E-07 |
| 2821 | Y10B_A | I20B_S | F19B_A | G1B_A  | 5.2E-07 | 1.7E-06 | 1.022E-06 | 3.099E-07 |
| 2822 | G13B_A | F3B_A  | F19B_W | V24B_T | 4.5E-07 | 1.5E-06 | 1.022E-06 | 2.987E-07 |
| 2823 | Y10B_A | L11B_A | L23B_R | V24B_N | 3.7E-07 | 1.8E-06 | 1.023E-06 | 3.252E-07 |
| 2824 | Y10B_A | F3B_A  | F19B_Q | V24B_T | 4.2E-07 | 1.6E-06 | 1.023E-06 | 3.225E-07 |
| 2825 | Y10B_A | S9B_A  | V24B_T | E12B_A | 6.2E-07 | 2.0E-06 | 1.023E-06 | 3.765E-07 |
| 2826 | Y10B_A | A16B_N | L11B_A | I20B_Q | 3.2E-07 | 1.8E-06 | 1.023E-06 | 4.775E-07 |
| 2827 | S8B_A  | D6B_A  | F19B_Q | V24B_N | 4.0E-07 | 2.0E-06 | 1.023E-06 | 4.247E-07 |
| 2828 | G13B_A | A16B_N | S9B_A  | V24B_N | 4.0E-07 | 2.3E-06 | 1.024E-06 | 5.217E-07 |
| 2829 | Y10B_A | I20B_T | S5B_A  | S9B_A  | 6.5E-07 | 2.3E-06 | 1.024E-06 | 3.615E-07 |
| 2830 | Y10B_A | I20B_N | Q14B_A | E12B_A | 5.9E-07 | 1.8E-06 | 1.024E-06 | 2.840E-07 |
| 2831 | Y10B_A | F3B_A  | A16B_N | I20B_T | 1.8E-07 | 1.9E-06 | 1.025E-06 | 4.725E-07 |
| 2832 | G13B_A | L23B_R | V24B_T | Q14B_A | 6.0E-07 | 1.7E-06 | 1.025E-06 | 2.974E-07 |
| 2833 | G13B_A | S5B_A  | F19B_Q | V24B_Q | 5.4E-07 | 2.1E-06 | 1.025E-06 | 4.326E-07 |
| 2834 | G13B_A | V7B_A  | E18B_T | V24B_N | 2.8E-07 | 1.8E-06 | 1.026E-06 | 4.139E-07 |
| 2835 | G13B_A | L11B_A | F19B_W | V24B_T | 5.5E-07 | 2.0E-06 | 1.026E-06 | 3.996E-07 |
| 2836 | G13B_A | A16B_N | L23B_R | E12B_A | 2.4E-07 | 1.9E-06 | 1.026E-06 | 5.678E-07 |
| 2837 | G13B_A | I20B_Q | T2B_A  | G1B_A  | 3.6E-07 | 1.9E-06 | 1.026E-06 | 4.640E-07 |
| 2838 | S8B_A  | D6B_A  | F3B_A  | I20B_T | 5.5E-07 | 1.5E-06 | 1.027E-06 | 2.998E-07 |
| 2839 | G13B_A | Y10B_A | K17B_S | V24B_Q | 5.8E-07 | 1.7E-06 | 1.027E-06 | 3.632E-07 |
| 2840 | G13B_A | E18B_T | S9B_A  | E12B_A | 3.8E-07 | 2.6E-06 | 1.027E-06 | 4.823E-07 |
| 2841 | G13B_A | A16B_N | K17B_S | V24B_T | 2.3E-07 | 2.4E-06 | 1.027E-06 | 5.126E-07 |
| 2842 | G13B_A | I20B_S | S5B_A  | F19B_A | 6.1E-07 | 2.4E-06 | 1.027E-06 | 3.964E-07 |
| 2843 | Y10B_A | I20B_T | T2B_A  | E12B_A | 5.9E-07 | 1.6E-06 | 1.028E-06 | 2.847E-07 |
| 2844 | G13B_A | V7B_A  | F19B_Q | L23B_R | 4.6E-07 | 1.6E-06 | 1.028E-06 | 3.267E-07 |
| 2845 | Y10B_A | V7B_A  | I20B_S | F19B_A | 4.5E-07 | 1.4E-06 | 1.029E-06 | 2.513E-07 |
| 2846 | G13B_A | S8B_A  | I20B_T | G1B_R  | 6.1E-07 | 1.3E-06 | 1.029E-06 | 1.897E-07 |
| 2847 | Y10B_A | D6B_A  | I20B_N | L11B_A | 4.7E-07 | 1.4E-06 | 1.029E-06 | 2.818E-07 |
| 2848 | G13B_A | F3B_A  | I20B_Q | T4B_A  | 4.0E-07 | 1.6E-06 | 1.029E-06 | 3.771E-07 |
| 2849 | Y10B_A | I20B_N | K17B_A | S9B_A  | 5.9E-07 | 1.6E-06 | 1.030E-06 | 2.754E-07 |
| 2850 | G13B_A | V7B_A  | F19B_W | L23B_Q | 4.1E-07 | 1.6E-06 | 1.031E-06 | 4.083E-07 |
| 2851 | Y10B_A | E18B_T | I20B_T | K17B_A | 6.2E-07 | 1.5E-06 | 1.031E-06 | 2.389E-07 |
| 2852 | G13B_A | L11B_A | S9B_A  | L23B_R | 5.8E-07 | 1.9E-06 | 1.031E-06 | 3.241E-07 |
| 2853 | Y10B_A | E18B_T | F19B_W | K17B_S | 5.7E-07 | 2.5E-06 | 1.032E-06 | 4.621E-07 |
| 2854 | Y10B_A | L23B_R | K17B_S | E12B_A | 4.4E-07 | 2.1E-06 | 1.032E-06 | 4.189E-07 |
| 2855 | G13B_A | I20B_N | G1B_R  | Q14B_A | 6.2E-07 | 2.0E-06 | 1.033E-06 | 3.307E-07 |
| 2856 | G13B_A | Y10B_A | L11B_A | I20B_S | 7.4E-07 | 1.6E-06 | 1.033E-06 | 2.456E-07 |
| 2857 | G13B_A | V7B_A  | I20B_T | T2B_A  | 5.6E-07 | 1.5E-06 | 1.033E-06 | 2.803E-07 |
| 2858 | S8B_A  | G13B_W | I20B_S | Q14B_A | 6.3E-07 | 1.6E-06 | 1.033E-06 | 2.823E-07 |
| 2859 | Y10B_A | A16B_N | L23B_R | V24B_T | 2.2E-07 | 1.8E-06 | 1.033E-06 | 4.097E-07 |



|      |        |        |        |        |         |         |           |           |
|------|--------|--------|--------|--------|---------|---------|-----------|-----------|
| 2860 | G13B_A | V7B_A  | I20B_T | S5B_A  | 6.1E-07 | 1.4E-06 | 1.033E-06 | 2.116E-07 |
| 2861 | G13B_A | F3B_A  | F19B_Q | L23B_R | 3.4E-07 | 1.8E-06 | 1.033E-06 | 3.704E-07 |
| 2862 | Y10B_A | I20B_N | S5B_A  | E12B_A | 5.9E-07 | 1.5E-06 | 1.033E-06 | 2.706E-07 |
| 2863 | G13B_A | Y10B_A | I20B_N | G1B_A  | 4.4E-07 | 1.6E-06 | 1.033E-06 | 3.515E-07 |
| 2864 | Y10B_A | G13B_W | F19B_W | V24B_T | 5.0E-07 | 1.6E-06 | 1.034E-06 | 3.408E-07 |
| 2865 | S8B_A  | G13B_W | F19B_Q | K17B_S | 2.5E-07 | 1.8E-06 | 1.034E-06 | 4.210E-07 |
| 2866 | G13B_A | F3B_A  | I20B_N | Q14B_A | 6.3E-07 | 1.5E-06 | 1.034E-06 | 2.424E-07 |
| 2867 | G13B_A | L11B_A | F19B_Q | L23B_R | 6.6E-07 | 1.8E-06 | 1.034E-06 | 3.217E-07 |
| 2868 | S8B_A  | D6B_A  | F3B_A  | I20B_Q | 5.5E-07 | 1.8E-06 | 1.035E-06 | 3.587E-07 |
| 2869 | G13B_A | Y10B_A | L23B_R | V24B_T | 6.3E-07 | 1.7E-06 | 1.035E-06 | 2.899E-07 |
| 2870 | G13B_A | F3B_A  | S9B_A  | L23B_Q | 6.1E-07 | 1.9E-06 | 1.035E-06 | 3.085E-07 |
| 2871 | G13B_A | S8B_A  | L23B_R | V24B_N | 7.1E-07 | 1.6E-06 | 1.035E-06 | 2.384E-07 |
| 2872 | G13B_A | L11B_A | F19B_W | L23B_Q | 5.7E-07 | 2.0E-06 | 1.035E-06 | 4.014E-07 |
| 2873 | Y10B_A | V7B_A  | A16B_N | I20B_T | 1.7E-07 | 1.7E-06 | 1.035E-06 | 4.125E-07 |
| 2874 | G13B_A | L11B_A | I20B_Q | T4B_A  | 6.0E-07 | 2.2E-06 | 1.036E-06 | 3.664E-07 |
| 2875 | G13B_A | I20B_N | Q14B_A | G1B_A  | 6.3E-07 | 1.7E-06 | 1.036E-06 | 2.770E-07 |
| 2876 | Y10B_A | L11B_A | I20B_S | G1B_R  | 5.9E-07 | 1.4E-06 | 1.036E-06 | 2.356E-07 |
| 2877 | Y10B_A | V7B_A  | L11B_A | I20B_S | 6.3E-07 | 1.8E-06 | 1.036E-06 | 3.357E-07 |
| 2878 | G13B_A | V7B_A  | F19B_W | V24B_T | 5.3E-07 | 1.9E-06 | 1.036E-06 | 3.796E-07 |
| 2879 | Y10B_A | D6B_A  | L23B_R | V24B_N | 5.8E-07 | 1.7E-06 | 1.036E-06 | 3.001E-07 |
| 2880 | Y10B_A | I20B_T | S5B_A  | F19B_W | 5.4E-07 | 1.7E-06 | 1.037E-06 | 2.737E-07 |
| 2881 | Y10B_A | I20B_T | L11B_A | G1B_R  | 4.8E-07 | 1.8E-06 | 1.037E-06 | 3.217E-07 |
| 2882 | G13B_A | Y10B_A | I20B_Q | E18B_A | 4.7E-07 | 1.8E-06 | 1.037E-06 | 3.411E-07 |
| 2883 | G13B_A | A16B_N | F19B_W | L23B_Q | 1.5E-07 | 2.0E-06 | 1.037E-06 | 4.992E-07 |
| 2884 | Y10B_A | L11B_A | F19B_Q | V24B_Q | 4.6E-07 | 1.6E-06 | 1.038E-06 | 2.850E-07 |
| 2885 | Y10B_A | G13B_W | E12B_A | V24B_N | 3.2E-07 | 2.0E-06 | 1.038E-06 | 4.375E-07 |
| 2886 | G13B_A | Y10B_A | V7B_A  | I20B_Q | 7.1E-07 | 1.5E-06 | 1.038E-06 | 2.564E-07 |
| 2887 | Y10B_A | I20B_N | E18B_T | K17B_A | 4.0E-07 | 1.7E-06 | 1.038E-06 | 3.349E-07 |
| 2888 | G13B_A | E18B_T | F19B_W | E12B_A | 5.2E-07 | 2.1E-06 | 1.038E-06 | 4.372E-07 |
| 2889 | G13B_A | S8B_A  | D6B_A  | I20B_Q | 5.2E-07 | 1.5E-06 | 1.039E-06 | 2.907E-07 |
| 2890 | Y10B_A | I20B_T | F19B_W | Q14B_A | 6.3E-07 | 1.6E-06 | 1.039E-06 | 2.429E-07 |
| 2891 | Y10B_A | F3B_A  | I20B_T | G1B_A  | 5.6E-07 | 1.4E-06 | 1.039E-06 | 2.229E-07 |
| 2892 | G13B_A | F19B_Q | L23B_R | G1B_A  | 4.1E-07 | 2.0E-06 | 1.040E-06 | 3.649E-07 |
| 2893 | Y10B_A | I20B_T | F19B_W | T4B_A  | 4.7E-07 | 2.0E-06 | 1.040E-06 | 4.670E-07 |
| 2894 | G13B_A | I20B_T | Q14B_A | G1B_A  | 3.7E-07 | 1.7E-06 | 1.040E-06 | 3.224E-07 |
| 2895 | G13B_A | E18B_T | L11B_A | V24B_T | 6.4E-07 | 1.5E-06 | 1.041E-06 | 2.277E-07 |
| 2896 | G13B_A | L11B_A | L23B_Q | E12B_A | 3.9E-07 | 1.9E-06 | 1.041E-06 | 4.152E-07 |
| 2897 | Y10B_A | E18B_T | F19B_Q | S9B_A  | 5.1E-07 | 2.5E-06 | 1.041E-06 | 5.459E-07 |
| 2898 | Y10B_A | F3B_A  | L23B_R | V24B_T | 6.0E-07 | 1.5E-06 | 1.041E-06 | 2.564E-07 |
| 2899 | G13B_A | F3B_A  | F19B_W | V24B_Q | 5.5E-07 | 2.1E-06 | 1.041E-06 | 3.858E-07 |
| 2900 | G13B_A | S8B_A  | F3B_A  | I20B_S | 5.4E-07 | 1.6E-06 | 1.042E-06 | 2.897E-07 |
| 2901 | G13B_A | E18B_T | F19B_W | S9B_A  | 4.1E-07 | 2.3E-06 | 1.042E-06 | 4.763E-07 |
| 2902 | G13B_A | V7B_A  | V24B_Q | E12B_A | 6.1E-07 | 1.9E-06 | 1.042E-06 | 3.455E-07 |
| 2903 | G13B_A | Y10B_A | D6B_A  | I20B_Q | 5.5E-07 | 2.1E-06 | 1.042E-06 | 3.592E-07 |
| 2904 | G13B_A | S9B_A  | V24B_Q | G1B_A  | 5.7E-07 | 1.6E-06 | 1.042E-06 | 3.157E-07 |
| 2905 | S8B_A  | G13B_W | I20B_T | T4B_A  | 7.8E-07 | 1.7E-06 | 1.043E-06 | 2.075E-07 |
| 2906 | G13B_A | A16B_N | S9B_A  | V24B_T | 4.2E-07 | 1.6E-06 | 1.043E-06 | 3.312E-07 |
| 2907 | S8B_A  | D6B_A  | I20B_S | G1B_R  | 4.1E-07 | 2.0E-06 | 1.043E-06 | 3.558E-07 |
| 2908 | Y10B_A | A16B_N | I20B_T | G1B_A  | 3.1E-07 | 1.7E-06 | 1.044E-06 | 4.688E-07 |
| 2909 | G13B_A | F19B_Q | K17B_S | G1B_A  | 1.5E-07 | 2.2E-06 | 1.044E-06 | 4.724E-07 |
| 2910 | Y10B_A | G13B_W | E18B_T | K17B_S | 7.1E-07 | 1.6E-06 | 1.044E-06 | 2.571E-07 |
| 2911 | Y10B_A | D6B_A  | L23B_Q | V24B_N | 5.3E-07 | 2.3E-06 | 1.044E-06 | 4.385E-07 |

|      |        |        |        |        |         |         |           |           |
|------|--------|--------|--------|--------|---------|---------|-----------|-----------|
| 2912 | S8B_A  | D6B_A  | V7B_A  | I20B_T | 5.4E-07 | 1.6E-06 | 1.045E-06 | 2.854E-07 |
| 2913 | Y10B_A | A16B_N | I20B_N | G1B_A  | 1.6E-07 | 2.7E-06 | 1.045E-06 | 5.801E-07 |
| 2914 | Y10B_A | I20B_T | L11B_A | G1B_A  | 5.4E-07 | 1.7E-06 | 1.045E-06 | 2.859E-07 |
| 2915 | Y10B_A | F19B_Q | K17B_S | E12B_A | 3.9E-07 | 1.9E-06 | 1.045E-06 | 4.546E-07 |
| 2916 | G13B_A | Y10B_A | I20B_N | F19B_A | 6.2E-07 | 1.7E-06 | 1.045E-06 | 3.254E-07 |
| 2917 | Y10B_A | A16B_N | I20B_N | E18B_A | 2.9E-07 | 2.2E-06 | 1.046E-06 | 5.657E-07 |
| 2918 | Y10B_A | F3B_A  | F19B_Q | V24B_Q | 3.9E-07 | 1.9E-06 | 1.046E-06 | 3.796E-07 |
| 2919 | G13B_A | A16B_N | I20B_S | S5B_A  | 2.6E-07 | 2.4E-06 | 1.047E-06 | 5.436E-07 |
| 2920 | G13B_A | E18B_T | L11B_A | V24B_Q | 5.0E-07 | 1.8E-06 | 1.047E-06 | 3.616E-07 |
| 2921 | G13B_A | F3B_A  | I20B_S | T2B_A  | 4.4E-07 | 1.6E-06 | 1.047E-06 | 3.018E-07 |
| 2922 | G13B_A | L11B_A | S9B_A  | V24B_Q | 5.1E-07 | 1.6E-06 | 1.048E-06 | 2.614E-07 |
| 2923 | Y10B_A | V7B_A  | I20B_S | G1B_R  | 6.9E-07 | 1.5E-06 | 1.050E-06 | 2.625E-07 |
| 2924 | Y10B_A | I20B_Q | E18B_A | F19B_A | 5.6E-07 | 1.8E-06 | 1.050E-06 | 3.809E-07 |
| 2925 | S8B_A  | D6B_A  | I20B_Q | G1B_A  | 4.7E-07 | 1.9E-06 | 1.050E-06 | 3.703E-07 |
| 2926 | G13B_A | V7B_A  | S9B_A  | V24B_T | 6.6E-07 | 1.9E-06 | 1.050E-06 | 3.023E-07 |
| 2927 | Y10B_A | V7B_A  | A16B_N | I20B_N | 1.9E-07 | 2.1E-06 | 1.050E-06 | 5.182E-07 |
| 2928 | Y10B_A | F3B_A  | I20B_T | F19B_A | 5.0E-07 | 1.9E-06 | 1.051E-06 | 3.471E-07 |
| 2929 | G13B_A | D6B_A  | E18B_T | V24B_Q | 5.0E-07 | 2.1E-06 | 1.051E-06 | 3.806E-07 |
| 2930 | G13B_A | I20B_S | T4B_A  | G1B_A  | 4.8E-07 | 1.7E-06 | 1.052E-06 | 2.986E-07 |
| 2931 | Y10B_A | D6B_A  | I20B_S | F19B_A | 4.8E-07 | 2.5E-06 | 1.052E-06 | 5.188E-07 |
| 2932 | Y10B_A | G1B_R  | L23B_Q | K17B_S | 6.8E-07 | 1.9E-06 | 1.052E-06 | 2.747E-07 |
| 2933 | Y10B_A | V7B_A  | F19B_Q | L23B_Q | 4.2E-07 | 1.9E-06 | 1.052E-06 | 3.659E-07 |
| 2934 | Y10B_A | S9B_A  | E12B_A | V24B_N | 5.3E-07 | 1.7E-06 | 1.052E-06 | 2.798E-07 |
| 2935 | Y10B_A | F19B_W | L23B_Q | E12B_A | 2.7E-07 | 2.3E-06 | 1.052E-06 | 5.409E-07 |
| 2936 | Y10B_A | V7B_A  | A16B_N | I20B_S | 3.6E-07 | 1.8E-06 | 1.053E-06 | 4.100E-07 |
| 2937 | G13B_A | I20B_Q | T4B_A  | G1B_A  | 6.1E-07 | 2.0E-06 | 1.053E-06 | 3.469E-07 |
| 2938 | Y10B_A | E18B_T | G1B_R  | V24B_N | 5.9E-07 | 1.7E-06 | 1.053E-06 | 3.049E-07 |
| 2939 | G13B_A | D6B_A  | L23B_R | K17B_S | 6.7E-07 | 1.5E-06 | 1.054E-06 | 3.209E-07 |
| 2940 | G13B_A | E18B_A | K17B_S | V24B_T | 7.1E-07 | 1.5E-06 | 1.054E-06 | 2.745E-07 |
| 2941 | Y10B_A | I20B_T | T4B_A  | S9B_A  | 6.1E-07 | 1.4E-06 | 1.054E-06 | 2.337E-07 |
| 2942 | Y10B_A | F3B_A  | A16B_N | I20B_S | 1.6E-07 | 2.1E-06 | 1.054E-06 | 5.889E-07 |
| 2943 | Y10B_A | I20B_T | K17B_A | F19B_W | 4.9E-07 | 1.6E-06 | 1.054E-06 | 2.669E-07 |
| 2944 | Y10B_A | F19B_W | L23B_R | K17B_S | 3.5E-07 | 2.0E-06 | 1.054E-06 | 4.206E-07 |
| 2945 | G13B_A | V7B_A  | I20B_Q | T4B_A  | 5.4E-07 | 1.7E-06 | 1.054E-06 | 3.463E-07 |
| 2946 | Y10B_A | S8B_A  | I20B_S | E12B_A | 6.9E-07 | 1.5E-06 | 1.055E-06 | 2.266E-07 |
| 2947 | Y10B_A | K17B_S | V24B_N | G1B_A  | 5.8E-07 | 1.6E-06 | 1.055E-06 | 2.958E-07 |
| 2948 | G13B_A | T4B_A  | F19B_Q | L23B_Q | 4.2E-07 | 2.2E-06 | 1.055E-06 | 4.611E-07 |
| 2949 | Y10B_A | S8B_A  | G13B_W | I20B_S | 7.4E-07 | 1.7E-06 | 1.055E-06 | 2.908E-07 |
| 2950 | G13B_A | E18B_T | L23B_Q | G1B_A  | 3.4E-07 | 2.0E-06 | 1.056E-06 | 4.198E-07 |
| 2951 | Y10B_A | L23B_R | F19B_A | V24B_Q | 6.0E-07 | 1.6E-06 | 1.057E-06 | 2.931E-07 |
| 2952 | S8B_A  | V7B_A  | I20B_N | L11B_A | 5.4E-07 | 2.0E-06 | 1.057E-06 | 3.306E-07 |
| 2953 | G13B_A | Y10B_A | I20B_T | G1B_A  | 7.1E-07 | 1.4E-06 | 1.057E-06 | 2.043E-07 |
| 2954 | Y10B_A | A16B_N | I20B_Q | G1B_A  | 2.4E-07 | 2.1E-06 | 1.058E-06 | 5.190E-07 |
| 2955 | G13B_A | I20B_T | S5B_A  | G1B_A  | 6.4E-07 | 1.9E-06 | 1.058E-06 | 3.169E-07 |
| 2956 | Y10B_A | D6B_A  | I20B_T | G1B_A  | 6.0E-07 | 1.5E-06 | 1.058E-06 | 2.473E-07 |
| 2957 | S8B_A  | G13B_W | G1B_R  | V24B_Q | 4.0E-07 | 1.7E-06 | 1.059E-06 | 3.448E-07 |
| 2958 | G13B_A | Y10B_A | A16B_N | I20B_N | 1.9E-07 | 1.8E-06 | 1.059E-06 | 5.004E-07 |
| 2959 | G13B_A | I20B_N | E18B_A | T2B_A  | 5.5E-07 | 1.8E-06 | 1.059E-06 | 3.464E-07 |
| 2960 | S8B_A  | V7B_A  | F3B_A  | I20B_S | 5.4E-07 | 1.8E-06 | 1.059E-06 | 3.298E-07 |
| 2961 | G13B_A | S5B_A  | F19B_Q | V24B_N | 5.3E-07 | 2.3E-06 | 1.059E-06 | 4.155E-07 |
| 2962 | S8B_A  | G13B_W | S9B_A  | K17B_S | 3.7E-07 | 1.7E-06 | 1.060E-06 | 3.576E-07 |
| 2963 | Y10B_A | I20B_S | E18B_A | G1B_R  | 6.3E-07 | 1.8E-06 | 1.060E-06 | 2.732E-07 |

|      |        |        |        |        |         |         |           |           |
|------|--------|--------|--------|--------|---------|---------|-----------|-----------|
| 2964 | S8B_A  | V7B_A  | A16B_N | I20B_T | 4.1E-07 | 3.0E-06 | 1.060E-06 | 5.298E-07 |
| 2965 | G13B_A | S8B_A  | I20B_T | L11B_A | 6.0E-07 | 1.5E-06 | 1.061E-06 | 2.664E-07 |
| 2966 | G13B_A | Y10B_A | V7B_A  | I20B_N | 4.4E-07 | 1.7E-06 | 1.061E-06 | 2.803E-07 |
| 2967 | Y10B_A | I20B_S | E18B_A | F19B_A | 5.8E-07 | 1.7E-06 | 1.061E-06 | 3.426E-07 |
| 2968 | Y10B_A | A16B_N | L23B_R | V24B_N | 2.9E-07 | 2.0E-06 | 1.061E-06 | 4.761E-07 |
| 2969 | Y10B_A | G13B_W | F19B_Q | S9B_A  | 5.9E-07 | 1.8E-06 | 1.062E-06 | 4.280E-07 |
| 2970 | G13B_A | F3B_A  | I20B_T | S5B_A  | 6.2E-07 | 1.7E-06 | 1.062E-06 | 2.483E-07 |
| 2971 | Y10B_A | D6B_A  | I20B_N | F19B_A | 6.1E-07 | 2.3E-06 | 1.062E-06 | 4.140E-07 |
| 2972 | Y10B_A | F3B_A  | I20B_Q | E18B_A | 5.5E-07 | 1.8E-06 | 1.063E-06 | 3.586E-07 |
| 2973 | G13B_A | I20B_Q | E18B_A | T2B_A  | 6.8E-07 | 2.1E-06 | 1.063E-06 | 3.959E-07 |
| 2974 | G13B_A | E18B_T | F19B_A | V24B_T | 5.8E-07 | 1.6E-06 | 1.063E-06 | 3.231E-07 |
| 2975 | Y10B_A | I20B_Q | S5B_A  | G1B_A  | 4.6E-07 | 2.0E-06 | 1.063E-06 | 4.578E-07 |
| 2976 | G13B_A | Y10B_A | D6B_A  | I20B_S | 6.5E-07 | 1.3E-06 | 1.063E-06 | 1.946E-07 |
| 2977 | Y10B_A | F3B_A  | I20B_Q | Q14B_A | 7.1E-07 | 1.9E-06 | 1.064E-06 | 2.823E-07 |
| 2978 | Y10B_A | D6B_A  | L23B_R | V24B_Q | 6.5E-07 | 1.8E-06 | 1.065E-06 | 2.575E-07 |
| 2979 | Y10B_A | E18B_A | L23B_Q | V24B_Q | 5.5E-07 | 3.0E-06 | 1.065E-06 | 5.552E-07 |
| 2980 | Y10B_A | G13B_W | S9B_A  | K17B_S | 6.1E-07 | 1.7E-06 | 1.065E-06 | 2.996E-07 |
| 2981 | Y10B_A | F19B_W | E12B_A | V24B_N | 6.9E-07 | 1.7E-06 | 1.065E-06 | 3.010E-07 |
| 2982 | G13B_A | V7B_A  | F19B_Q | K17B_S | 5.7E-07 | 2.1E-06 | 1.065E-06 | 3.682E-07 |
| 2983 | G13B_A | I20B_S | T2B_A  | G1B_A  | 5.4E-07 | 1.9E-06 | 1.067E-06 | 3.328E-07 |
| 2984 | G13B_A | V7B_A  | I20B_Q | S5B_A  | 5.1E-07 | 1.7E-06 | 1.067E-06 | 3.389E-07 |
| 2985 | G13B_A | V7B_A  | I20B_N | T4B_A  | 5.4E-07 | 1.7E-06 | 1.067E-06 | 3.084E-07 |
| 2986 | Y10B_A | V7B_A  | I20B_S | G1B_A  | 4.4E-07 | 1.6E-06 | 1.067E-06 | 3.251E-07 |
| 2987 | G13B_A | D6B_A  | S9B_A  | V24B_Q | 6.1E-07 | 1.7E-06 | 1.067E-06 | 3.009E-07 |
| 2988 | Y10B_A | A16B_N | I20B_S | G1B_R  | 1.8E-07 | 1.8E-06 | 1.067E-06 | 3.956E-07 |
| 2989 | Y10B_A | S8B_A  | I20B_N | F19B_W | 5.2E-07 | 2.0E-06 | 1.067E-06 | 3.418E-07 |
| 2990 | G13B_A | I20B_S | K17B_A | E12B_A | 5.9E-07 | 2.4E-06 | 1.067E-06 | 3.880E-07 |
| 2991 | S8B_A  | G13B_W | I20B_S | K17B_A | 5.1E-07 | 1.6E-06 | 1.067E-06 | 2.424E-07 |
| 2992 | G13B_A | A16B_N | I20B_N | K17B_A | 3.5E-07 | 2.1E-06 | 1.067E-06 | 5.387E-07 |
| 2993 | Y10B_A | A16B_N | I20B_S | E18B_A | 3.3E-07 | 2.3E-06 | 1.068E-06 | 5.643E-07 |
| 2994 | G13B_A | Y10B_A | F3B_A  | I20B_T | 5.4E-07 | 1.7E-06 | 1.069E-06 | 2.834E-07 |
| 2995 | Y10B_A | I20B_N | F19B_W | Q14B_A | 5.2E-07 | 1.6E-06 | 1.069E-06 | 3.225E-07 |
| 2996 | Y10B_A | L23B_R | V24B_T | G1B_A  | 5.2E-07 | 1.8E-06 | 1.069E-06 | 3.236E-07 |
| 2997 | Y10B_A | D6B_A  | I20B_T | G1B_R  | 6.3E-07 | 1.4E-06 | 1.069E-06 | 2.159E-07 |
| 2998 | G13B_A | L23B_R | V24B_Q | T2B_A  | 5.9E-07 | 2.7E-06 | 1.069E-06 | 5.781E-07 |
| 2999 | G13B_A | D6B_A  | I20B_Q | T4B_A  | 6.5E-07 | 1.8E-06 | 1.070E-06 | 3.007E-07 |
| 3000 | G13B_A | Y10B_A | F3B_A  | I20B_S | 6.3E-07 | 1.7E-06 | 1.070E-06 | 3.313E-07 |
| 3001 | G13B_A | A16B_N | I20B_N | S5B_A  | 2.2E-07 | 1.8E-06 | 1.070E-06 | 4.649E-07 |
| 3002 | Y10B_A | D6B_A  | A16B_N | I20B_S | 3.3E-07 | 1.7E-06 | 1.071E-06 | 4.099E-07 |
| 3003 | G13B_A | Y10B_A | L23B_Q | V24B_T | 6.1E-07 | 2.0E-06 | 1.071E-06 | 4.300E-07 |
| 3004 | Y10B_A | V7B_A  | K17B_S | V24B_Q | 4.3E-07 | 1.7E-06 | 1.071E-06 | 3.434E-07 |
| 3005 | G13B_A | G1B_R  | F19B_W | V24B_N | 4.9E-07 | 2.0E-06 | 1.072E-06 | 3.360E-07 |
| 3006 | Y10B_A | I20B_S | F19B_W | T4B_A  | 6.3E-07 | 2.4E-06 | 1.072E-06 | 4.376E-07 |
| 3007 | G13B_A | E18B_T | G1B_R  | F19B_Q | 3.8E-07 | 1.5E-06 | 1.072E-06 | 3.112E-07 |
| 3008 | G13B_A | F3B_A  | V24B_Q | E12B_A | 6.1E-07 | 2.0E-06 | 1.072E-06 | 3.300E-07 |
| 3009 | Y10B_A | F3B_A  | F19B_Q | V24B_N | 4.4E-07 | 2.1E-06 | 1.073E-06 | 5.015E-07 |
| 3010 | G13B_A | F19B_Q | V24B_Q | Q14B_A | 4.8E-07 | 1.9E-06 | 1.073E-06 | 3.923E-07 |
| 3011 | G13B_A | Y10B_A | D6B_A  | I20B_T | 6.8E-07 | 1.9E-06 | 1.073E-06 | 3.126E-07 |
| 3012 | G13B_A | D6B_A  | I20B_S | T4B_A  | 6.8E-07 | 1.9E-06 | 1.073E-06 | 3.183E-07 |
| 3013 | Y10B_A | D6B_A  | L23B_Q | V24B_T | 7.7E-07 | 1.5E-06 | 1.073E-06 | 1.963E-07 |
| 3014 | S8B_A  | D6B_A  | F19B_Q | V24B_T | 4.2E-07 | 2.0E-06 | 1.075E-06 | 5.272E-07 |
| 3015 | S8B_A  | D6B_A  | V7B_A  | I20B_N | 5.7E-07 | 1.8E-06 | 1.075E-06 | 3.336E-07 |

|      |        |        |        |        |         |         |           |           |
|------|--------|--------|--------|--------|---------|---------|-----------|-----------|
| 3016 | G13B_A | S8B_A  | F19B_Q | V24B_N | 3.3E-07 | 2.1E-06 | 1.075E-06 | 3.817E-07 |
| 3017 | Y10B_A | F19B_W | S9B_A  | L23B_Q | 6.1E-07 | 2.1E-06 | 1.075E-06 | 3.990E-07 |
| 3018 | G13B_A | F19B_A | V24B_Q | E12B_A | 5.6E-07 | 1.5E-06 | 1.075E-06 | 2.592E-07 |
| 3019 | G13B_A | K17B_A | L23B_Q | V24B_T | 5.5E-07 | 1.8E-06 | 1.075E-06 | 2.854E-07 |
| 3020 | S8B_A  | D6B_A  | L11B_A | I20B_S | 5.8E-07 | 1.6E-06 | 1.076E-06 | 3.148E-07 |
| 3021 | G13B_A | S8B_A  | L23B_Q | K17B_S | 7.2E-07 | 1.5E-06 | 1.076E-06 | 2.549E-07 |
| 3022 | Y10B_A | A16B_N | L23B_Q | V24B_Q | 1.7E-07 | 2.2E-06 | 1.076E-06 | 4.726E-07 |
| 3023 | Y10B_A | D6B_A  | V7B_A  | I20B_S | 6.1E-07 | 2.1E-06 | 1.077E-06 | 3.709E-07 |
| 3024 | G13B_A | L23B_R | K17B_S | F19B_A | 6.0E-07 | 1.9E-06 | 1.077E-06 | 3.479E-07 |
| 3025 | Y10B_A | D6B_A  | I20B_T | F19B_A | 6.6E-07 | 1.8E-06 | 1.077E-06 | 3.166E-07 |
| 3026 | G13B_A | I20B_Q | S5B_A  | F19B_A | 3.8E-07 | 2.4E-06 | 1.078E-06 | 4.757E-07 |
| 3027 | G13B_A | S5B_A  | F19B_Q | L23B_Q | 6.8E-07 | 1.7E-06 | 1.078E-06 | 2.874E-07 |
| 3028 | G13B_A | D6B_A  | E18B_T | L23B_R | 5.8E-07 | 1.7E-06 | 1.078E-06 | 3.467E-07 |
| 3029 | G13B_A | Y10B_A | V7B_A  | I20B_T | 6.6E-07 | 1.6E-06 | 1.079E-06 | 2.538E-07 |
| 3030 | G13B_A | D6B_A  | S9B_A  | V24B_T | 7.2E-07 | 1.6E-06 | 1.079E-06 | 2.534E-07 |
| 3031 | Y10B_A | E18B_T | F19B_Q | E12B_A | 3.0E-07 | 2.5E-06 | 1.079E-06 | 5.847E-07 |
| 3032 | S8B_A  | G13B_W | F19B_W | V24B_N | 6.8E-07 | 1.7E-06 | 1.080E-06 | 2.698E-07 |
| 3033 | G13B_A | L11B_A | I20B_S | T2B_A  | 4.4E-07 | 1.9E-06 | 1.080E-06 | 3.743E-07 |
| 3034 | Y10B_A | G1B_R  | F19B_W | L23B_Q | 5.0E-07 | 2.0E-06 | 1.080E-06 | 4.464E-07 |
| 3035 | S8B_A  | D6B_A  | I20B_Q | T4B_A  | 4.7E-07 | 2.0E-06 | 1.081E-06 | 3.558E-07 |
| 3036 | Y10B_A | L11B_A | I20B_Q | E18B_A | 4.7E-07 | 1.8E-06 | 1.082E-06 | 4.346E-07 |
| 3037 | G13B_A | F3B_A  | F19B_W | V24B_N | 2.8E-07 | 1.6E-06 | 1.082E-06 | 3.517E-07 |
| 3038 | G13B_A | E18B_A | F19B_Q | L23B_R | 6.3E-07 | 1.9E-06 | 1.082E-06 | 3.168E-07 |
| 3039 | G13B_A | F19B_A | E12B_A | V24B_N | 5.8E-07 | 1.7E-06 | 1.082E-06 | 3.388E-07 |
| 3040 | G13B_A | K17B_S | V24B_Q | T2B_A  | 6.0E-07 | 2.0E-06 | 1.082E-06 | 3.612E-07 |
| 3041 | Y10B_A | L23B_Q | K17B_S | F19B_A | 4.3E-07 | 2.3E-06 | 1.082E-06 | 4.682E-07 |
| 3042 | Y10B_A | G13B_W | E18B_T | F19B_Q | 5.4E-07 | 2.8E-06 | 1.082E-06 | 5.622E-07 |
| 3043 | G13B_A | D6B_A  | K17B_S | V24B_T | 6.5E-07 | 1.9E-06 | 1.083E-06 | 3.436E-07 |
| 3044 | S8B_A  | G13B_W | I20B_T | K17B_A | 7.7E-07 | 1.8E-06 | 1.083E-06 | 2.214E-07 |
| 3045 | G13B_A | A16B_N | V24B_Q | E12B_A | 1.1E-07 | 1.5E-06 | 1.083E-06 | 3.189E-07 |
| 3046 | S8B_A  | G13B_W | E18B_T | K17B_S | 5.1E-07 | 2.0E-06 | 1.084E-06 | 4.374E-07 |
| 3047 | Y10B_A | F19B_Q | S9B_A  | E12B_A | 5.3E-07 | 2.1E-06 | 1.084E-06 | 3.546E-07 |
| 3048 | G13B_A | I20B_S | G1B_R  | S5B_A  | 6.9E-07 | 1.7E-06 | 1.084E-06 | 3.081E-07 |
| 3049 | G13B_A | Y10B_A | I20B_S | F19B_A | 6.4E-07 | 2.4E-06 | 1.084E-06 | 4.032E-07 |
| 3050 | G13B_A | G1B_R  | V24B_T | E12B_A | 4.1E-07 | 1.6E-06 | 1.085E-06 | 2.944E-07 |
| 3051 | G13B_A | F3B_A  | I20B_S | T4B_A  | 6.3E-07 | 1.9E-06 | 1.085E-06 | 3.078E-07 |
| 3052 | Y10B_A | F3B_A  | A16B_N | I20B_N | 2.6E-07 | 2.0E-06 | 1.086E-06 | 5.368E-07 |
| 3053 | Y10B_A | E18B_T | F19B_Q | L23B_R | 4.3E-07 | 2.3E-06 | 1.086E-06 | 4.663E-07 |
| 3054 | S8B_A  | G13B_W | V24B_T | E12B_A | 6.2E-07 | 2.0E-06 | 1.086E-06 | 3.670E-07 |
| 3055 | G13B_A | V7B_A  | I20B_N | T2B_A  | 5.6E-07 | 1.7E-06 | 1.086E-06 | 2.836E-07 |
| 3056 | S8B_A  | G13B_W | I20B_N | K17B_A | 6.7E-07 | 1.8E-06 | 1.086E-06 | 3.117E-07 |
| 3057 | G13B_A | D6B_A  | I20B_T | Q14B_A | 7.1E-07 | 1.6E-06 | 1.086E-06 | 2.711E-07 |
| 3058 | Y10B_A | D6B_A  | I20B_Q | F19B_A | 4.8E-07 | 2.0E-06 | 1.087E-06 | 3.558E-07 |
| 3059 | Y10B_A | D6B_A  | A16B_N | I20B_T | 2.0E-07 | 1.6E-06 | 1.087E-06 | 3.836E-07 |
| 3060 | G13B_A | E18B_T | F19B_W | L23B_R | 3.9E-07 | 2.2E-06 | 1.087E-06 | 5.455E-07 |
| 3061 | G13B_A | S8B_A  | I20B_N | G1B_A  | 7.4E-07 | 1.5E-06 | 1.088E-06 | 2.445E-07 |
| 3062 | G13B_A | T4B_A  | F19B_Q | V24B_N | 4.8E-07 | 1.9E-06 | 1.088E-06 | 4.471E-07 |
| 3063 | S8B_A  | D6B_A  | A16B_N | I20B_S | 2.8E-07 | 1.6E-06 | 1.088E-06 | 3.576E-07 |
| 3064 | G13B_A | L23B_Q | F19B_A | E12B_A | 5.6E-07 | 2.1E-06 | 1.089E-06 | 4.128E-07 |
| 3065 | G13B_A | I20B_S | G1B_R  | T4B_A  | 4.8E-07 | 1.9E-06 | 1.089E-06 | 2.920E-07 |
| 3066 | G13B_A | I20B_N | E18B_A | T4B_A  | 6.2E-07 | 1.8E-06 | 1.089E-06 | 3.056E-07 |
| 3067 | S8B_A  | D6B_A  | I20B_T | G1B_A  | 5.8E-07 | 1.9E-06 | 1.090E-06 | 3.494E-07 |

|      |        |        |        |        |         |         |           |           |
|------|--------|--------|--------|--------|---------|---------|-----------|-----------|
| 3068 | Y10B_A | A16B_N | K17B_S | V24B_N | 1.9E-07 | 3.0E-06 | 1.091E-06 | 7.204E-07 |
| 3069 | Y10B_A | I20B_N | S5B_A  | F19B_W | 6.0E-07 | 2.2E-06 | 1.092E-06 | 3.719E-07 |
| 3070 | G13B_A | E18B_A | V24B_Q | E12B_A | 5.6E-07 | 1.5E-06 | 1.092E-06 | 2.361E-07 |
| 3071 | G13B_A | S8B_A  | I20B_N | L11B_A | 7.4E-07 | 1.9E-06 | 1.092E-06 | 3.306E-07 |
| 3072 | G13B_A | E18B_T | L23B_R | G1B_A  | 6.3E-07 | 1.7E-06 | 1.092E-06 | 3.262E-07 |
| 3073 | S8B_A  | D6B_A  | F3B_A  | I20B_S | 6.8E-07 | 1.7E-06 | 1.092E-06 | 2.790E-07 |
| 3074 | Y10B_A | E18B_T | F19B_W | L23B_Q | 4.2E-07 | 2.5E-06 | 1.092E-06 | 4.781E-07 |
| 3075 | G13B_A | L11B_A | S9B_A  | L23B_Q | 6.8E-07 | 1.9E-06 | 1.092E-06 | 3.380E-07 |
| 3076 | Y10B_A | F19B_Q | V24B_N | G1B_A  | 5.6E-07 | 1.9E-06 | 1.092E-06 | 3.848E-07 |
| 3077 | G13B_A | I20B_T | L11B_A | S5B_A  | 7.4E-07 | 1.6E-06 | 1.092E-06 | 2.362E-07 |
| 3078 | Y10B_A | F3B_A  | I20B_S | E18B_A | 4.7E-07 | 1.5E-06 | 1.092E-06 | 2.980E-07 |
| 3079 | Y10B_A | I20B_T | T4B_A  | E12B_A | 7.0E-07 | 1.8E-06 | 1.093E-06 | 2.884E-07 |
| 3080 | Y10B_A | S8B_A  | I20B_N | E12B_A | 6.9E-07 | 1.9E-06 | 1.094E-06 | 2.731E-07 |
| 3081 | G13B_A | I20B_N | F19B_A | Q14B_A | 5.4E-07 | 2.7E-06 | 1.096E-06 | 4.966E-07 |
| 3082 | G13B_A | I20B_N | L11B_A | T4B_A  | 4.6E-07 | 1.7E-06 | 1.097E-06 | 3.424E-07 |
| 3083 | G13B_A | I20B_Q | G1B_R  | K17B_A | 6.3E-07 | 1.7E-06 | 1.097E-06 | 3.246E-07 |
| 3084 | G13B_A | F19B_W | S9B_A  | E12B_A | 6.1E-07 | 1.9E-06 | 1.097E-06 | 3.244E-07 |
| 3085 | Y10B_A | V7B_A  | L23B_R | V24B_T | 5.8E-07 | 2.8E-06 | 1.097E-06 | 4.842E-07 |
| 3086 | S8B_A  | G13B_W | L23B_R | E12B_A | 4.3E-07 | 2.1E-06 | 1.097E-06 | 3.834E-07 |
| 3087 | G13B_A | L11B_A | I20B_S | T4B_A  | 6.3E-07 | 1.3E-06 | 1.098E-06 | 1.915E-07 |
| 3088 | G13B_A | I20B_S | E18B_A | Q14B_A | 6.8E-07 | 1.8E-06 | 1.098E-06 | 3.218E-07 |
| 3089 | G13B_A | A16B_N | S9B_A  | L23B_Q | 4.0E-07 | 2.3E-06 | 1.098E-06 | 4.603E-07 |
| 3090 | Y10B_A | I20B_T | E18B_A | G1B_A  | 7.1E-07 | 1.9E-06 | 1.098E-06 | 3.382E-07 |
| 3091 | G13B_A | D6B_A  | E18B_T | V24B_N | 3.8E-07 | 2.0E-06 | 1.099E-06 | 4.121E-07 |
| 3092 | G13B_A | L11B_A | L23B_Q | K17B_S | 5.5E-07 | 2.1E-06 | 1.099E-06 | 4.349E-07 |
| 3093 | S8B_A  | G13B_W | I20B_Q | K17B_A | 4.9E-07 | 2.0E-06 | 1.100E-06 | 3.644E-07 |
| 3094 | G13B_A | F3B_A  | I20B_T | T2B_A  | 5.4E-07 | 1.6E-06 | 1.100E-06 | 3.243E-07 |
| 3095 | G13B_A | D6B_A  | F19B_Q | S9B_A  | 5.7E-07 | 2.0E-06 | 1.100E-06 | 4.596E-07 |
| 3096 | Y10B_A | D6B_A  | I20B_Q | G1B_A  | 5.5E-07 | 1.8E-06 | 1.100E-06 | 3.903E-07 |
| 3097 | G13B_A | V7B_A  | I20B_T | T4B_A  | 6.4E-07 | 1.6E-06 | 1.101E-06 | 2.420E-07 |
| 3098 | G13B_A | V7B_A  | E18B_T | L23B_Q | 6.7E-07 | 1.4E-06 | 1.101E-06 | 2.509E-07 |
| 3099 | G13B_A | I20B_Q | E18B_A | Q14B_A | 4.7E-07 | 1.5E-06 | 1.101E-06 | 2.955E-07 |
| 3100 | Y10B_A | V7B_A  | I20B_N | F19B_A | 5.4E-07 | 1.9E-06 | 1.101E-06 | 3.823E-07 |
| 3101 | G13B_A | I20B_T | F19B_A | Q14B_A | 6.4E-07 | 1.8E-06 | 1.102E-06 | 2.816E-07 |
| 3102 | G13B_A | S8B_A  | L23B_R | V24B_T | 7.1E-07 | 1.9E-06 | 1.103E-06 | 3.558E-07 |
| 3103 | G13B_A | I20B_N | G1B_R  | T4B_A  | 6.9E-07 | 1.5E-06 | 1.103E-06 | 2.481E-07 |
| 3104 | Y10B_A | A16B_N | K17B_S | V24B_Q | 3.6E-07 | 2.1E-06 | 1.104E-06 | 4.675E-07 |
| 3105 | G13B_A | S9B_A  | V24B_T | G1B_A  | 7.0E-07 | 1.9E-06 | 1.104E-06 | 3.131E-07 |
| 3106 | S8B_A  | V7B_A  | A16B_N | I20B_Q | 2.6E-07 | 2.0E-06 | 1.104E-06 | 5.180E-07 |
| 3107 | G13B_A | A16B_N | I20B_S | T2B_A  | 2.6E-07 | 2.0E-06 | 1.105E-06 | 4.807E-07 |
| 3108 | Y10B_A | F3B_A  | K17B_S | V24B_Q | 4.2E-07 | 1.7E-06 | 1.105E-06 | 3.737E-07 |
| 3109 | G13B_A | V7B_A  | L23B_R | K17B_S | 5.5E-07 | 2.3E-06 | 1.105E-06 | 4.035E-07 |
| 3110 | G13B_A | E18B_T | L11B_A | L23B_Q | 5.8E-07 | 2.4E-06 | 1.105E-06 | 4.284E-07 |
| 3111 | S8B_A  | D6B_A  | I20B_Q | E18B_A | 5.9E-07 | 1.8E-06 | 1.106E-06 | 3.387E-07 |
| 3112 | Y10B_A | S8B_A  | F19B_Q | V24B_Q | 3.7E-07 | 1.8E-06 | 1.106E-06 | 3.571E-07 |
| 3113 | G13B_A | E18B_A | S9B_A  | V24B_Q | 5.8E-07 | 2.0E-06 | 1.106E-06 | 3.894E-07 |
| 3114 | G13B_A | L11B_A | I20B_S | Q14B_A | 6.3E-07 | 1.7E-06 | 1.107E-06 | 3.169E-07 |
| 3115 | S8B_A  | G13B_W | E18B_T | S9B_A  | 6.7E-07 | 1.6E-06 | 1.107E-06 | 2.575E-07 |
| 3116 | G13B_A | V7B_A  | S9B_A  | L23B_R | 7.4E-07 | 1.6E-06 | 1.108E-06 | 2.237E-07 |
| 3117 | G13B_A | F3B_A  | I20B_N | T2B_A  | 6.3E-07 | 1.6E-06 | 1.109E-06 | 3.033E-07 |
| 3118 | Y10B_A | S8B_A  | I20B_Q | F19B_A | 5.3E-07 | 2.4E-06 | 1.109E-06 | 4.068E-07 |
| 3119 | G13B_A | V7B_A  | L23B_Q | E12B_A | 6.5E-07 | 1.8E-06 | 1.109E-06 | 3.100E-07 |

|      |        |        |        |        |         |         |           |           |
|------|--------|--------|--------|--------|---------|---------|-----------|-----------|
| 3120 | G13B_A | A16B_N | I20B_T | T2B_A  | 2.2E-07 | 2.4E-06 | 1.109E-06 | 4.513E-07 |
| 3121 | Y10B_A | V7B_A  | I20B_N | G1B_A  | 6.0E-07 | 1.9E-06 | 1.110E-06 | 3.655E-07 |
| 3122 | Y10B_A | F3B_A  | I20B_T | E18B_A | 4.7E-07 | 1.9E-06 | 1.110E-06 | 3.919E-07 |
| 3123 | Y10B_A | G1B_R  | F19B_Q | L23B_Q | 4.4E-07 | 3.2E-06 | 1.110E-06 | 6.635E-07 |
| 3124 | Y10B_A | T4B_A  | L23B_Q | V24B_Q | 5.5E-07 | 2.6E-06 | 1.110E-06 | 4.711E-07 |
| 3125 | G13B_A | L11B_A | F19B_Q | S9B_A  | 5.0E-07 | 1.8E-06 | 1.111E-06 | 4.086E-07 |
| 3126 | Y10B_A | D6B_A  | I20B_N | G1B_R  | 6.3E-07 | 1.6E-06 | 1.111E-06 | 3.000E-07 |
| 3127 | Y10B_A | I20B_N | L11B_A | G1B_A  | 6.3E-07 | 1.8E-06 | 1.112E-06 | 3.413E-07 |
| 3128 | S8B_A  | D6B_A  | A16B_N | I20B_Q | 1.9E-07 | 2.0E-06 | 1.113E-06 | 5.874E-07 |
| 3129 | G13B_A | Y10B_A | F19B_Q | V24B_T | 4.6E-07 | 1.6E-06 | 1.113E-06 | 3.496E-07 |
| 3130 | G13B_A | I20B_N | T2B_A  | G1B_A  | 6.0E-07 | 1.7E-06 | 1.114E-06 | 3.269E-07 |
| 3131 | Y10B_A | A16B_N | S9B_A  | L23B_R | 2.4E-07 | 2.4E-06 | 1.114E-06 | 5.101E-07 |
| 3132 | G13B_A | A16B_N | S9B_A  | L23B_R | 5.8E-07 | 1.6E-06 | 1.114E-06 | 2.696E-07 |
| 3133 | Y10B_A | A16B_N | L23B_Q | V24B_T | 1.8E-07 | 2.3E-06 | 1.114E-06 | 5.311E-07 |
| 3134 | Y10B_A | I20B_Q | T4B_A  | F19B_A | 5.6E-07 | 1.9E-06 | 1.115E-06 | 3.869E-07 |
| 3135 | S8B_A  | V7B_A  | A16B_N | I20B_S | 2.6E-07 | 1.8E-06 | 1.115E-06 | 4.397E-07 |
| 3136 | G13B_A | A16B_N | I20B_S | Q14B_A | 2.6E-07 | 1.8E-06 | 1.115E-06 | 4.578E-07 |
| 3137 | Y10B_A | V7B_A  | S9B_A  | V24B_Q | 6.4E-07 | 1.7E-06 | 1.115E-06 | 2.753E-07 |
| 3138 | Y10B_A | V7B_A  | I20B_S | E18B_A | 5.2E-07 | 1.9E-06 | 1.115E-06 | 3.572E-07 |
| 3139 | Y10B_A | I20B_T | E18B_A | F19B_A | 5.6E-07 | 1.8E-06 | 1.116E-06 | 3.205E-07 |
| 3140 | S8B_A  | D6B_A  | A16B_N | I20B_N | 2.4E-07 | 2.7E-06 | 1.116E-06 | 6.698E-07 |
| 3141 | Y10B_A | L11B_A | F19B_Q | V24B_T | 4.6E-07 | 1.6E-06 | 1.116E-06 | 3.524E-07 |
| 3142 | G13B_A | D6B_A  | S9B_A  | L23B_Q | 4.0E-07 | 1.8E-06 | 1.117E-06 | 3.644E-07 |
| 3143 | G13B_A | F3B_A  | I20B_T | T4B_A  | 7.4E-07 | 1.5E-06 | 1.117E-06 | 2.371E-07 |
| 3144 | G13B_A | F3B_A  | I20B_N | S5B_A  | 8.7E-07 | 1.5E-06 | 1.118E-06 | 2.076E-07 |
| 3145 | G13B_A | D6B_A  | S9B_A  | V24B_N | 7.2E-07 | 1.6E-06 | 1.120E-06 | 2.652E-07 |
| 3146 | G13B_A | L11B_A | S9B_A  | V24B_T | 8.2E-07 | 2.1E-06 | 1.120E-06 | 2.963E-07 |
| 3147 | Y10B_A | F3B_A  | K17B_S | V24B_N | 6.3E-07 | 1.6E-06 | 1.120E-06 | 3.188E-07 |
| 3148 | G13B_A | I20B_T | T4B_A  | G1B_A  | 5.6E-07 | 1.9E-06 | 1.120E-06 | 3.495E-07 |
| 3149 | G13B_A | D6B_A  | I20B_N | T4B_A  | 6.8E-07 | 1.6E-06 | 1.120E-06 | 2.876E-07 |
| 3150 | S8B_A  | G13B_W | G1B_R  | V24B_N | 7.9E-07 | 1.9E-06 | 1.120E-06 | 3.032E-07 |
| 3151 | Y10B_A | I20B_S | G1B_R  | F19B_A | 5.9E-07 | 2.1E-06 | 1.121E-06 | 3.595E-07 |
| 3152 | Y10B_A | A16B_N | L11B_A | I20B_S | 2.2E-07 | 2.3E-06 | 1.121E-06 | 5.226E-07 |
| 3153 | G13B_A | S8B_A  | F3B_A  | I20B_T | 7.4E-07 | 1.4E-06 | 1.121E-06 | 2.056E-07 |
| 3154 | Y10B_A | D6B_A  | I20B_S | G1B_A  | 6.8E-07 | 1.6E-06 | 1.121E-06 | 2.761E-07 |
| 3155 | G13B_A | S8B_A  | I20B_T | G1B_A  | 7.4E-07 | 1.7E-06 | 1.121E-06 | 2.766E-07 |
| 3156 | Y10B_A | E18B_T | V24B_Q | G1B_A  | 6.4E-07 | 1.8E-06 | 1.121E-06 | 3.567E-07 |
| 3157 | Y10B_A | F19B_W | S9B_A  | L23B_R | 3.9E-07 | 2.0E-06 | 1.121E-06 | 5.054E-07 |
| 3158 | G13B_A | E18B_T | V24B_Q | G1B_A  | 3.9E-07 | 2.3E-06 | 1.122E-06 | 5.296E-07 |
| 3159 | G13B_A | D6B_A  | F19B_W | V24B_N | 4.3E-07 | 2.0E-06 | 1.122E-06 | 3.500E-07 |
| 3160 | G13B_A | Y10B_A | D6B_A  | I20B_N | 6.4E-07 | 1.9E-06 | 1.122E-06 | 3.496E-07 |
| 3161 | Y10B_A | V7B_A  | I20B_Q | Q14B_A | 4.2E-07 | 1.6E-06 | 1.122E-06 | 3.194E-07 |
| 3162 | G13B_A | S8B_A  | I20B_S | G1B_R  | 5.6E-07 | 1.8E-06 | 1.123E-06 | 3.084E-07 |
| 3163 | G13B_A | F3B_A  | V24B_T | E12B_A | 7.2E-07 | 1.6E-06 | 1.123E-06 | 2.293E-07 |
| 3164 | Y10B_A | I20B_S | K17B_A | S9B_A  | 6.2E-07 | 1.9E-06 | 1.123E-06 | 3.464E-07 |
| 3165 | Y10B_A | I20B_N | E18B_A | G1B_R  | 5.6E-07 | 1.7E-06 | 1.123E-06 | 3.013E-07 |
| 3166 | G13B_A | V7B_A  | F19B_Q | S9B_A  | 4.8E-07 | 2.1E-06 | 1.124E-06 | 4.246E-07 |
| 3167 | Y10B_A | E18B_T | F19B_W | V24B_T | 5.0E-07 | 2.1E-06 | 1.124E-06 | 4.467E-07 |
| 3168 | Y10B_A | D6B_A  | F3B_A  | I20B_T | 6.8E-07 | 1.8E-06 | 1.125E-06 | 2.946E-07 |
| 3169 | Y10B_A | V7B_A  | I20B_N | L11B_A | 6.3E-07 | 1.7E-06 | 1.125E-06 | 3.025E-07 |
| 3170 | G13B_A | K17B_S | T2B_A  | V24B_N | 4.9E-07 | 2.3E-06 | 1.125E-06 | 4.044E-07 |
| 3171 | G13B_A | I20B_Q | K17B_A | F19B_A | 3.9E-07 | 1.8E-06 | 1.125E-06 | 4.478E-07 |

|      |        |        |        |        |         |         |           |           |
|------|--------|--------|--------|--------|---------|---------|-----------|-----------|
| 3172 | Y10B_A | L23B_Q | V24B_T | G1B_A  | 6.1E-07 | 1.9E-06 | 1.125E-06 | 3.366E-07 |
| 3173 | Y10B_A | E18B_T | G1B_R  | L23B_Q | 4.2E-07 | 2.1E-06 | 1.126E-06 | 4.049E-07 |
| 3174 | Y10B_A | D6B_A  | I20B_T | L11B_A | 6.8E-07 | 1.8E-06 | 1.126E-06 | 3.185E-07 |
| 3175 | G13B_A | Y10B_A | I20B_N | E18B_A | 6.8E-07 | 1.6E-06 | 1.126E-06 | 2.676E-07 |
| 3176 | S8B_A  | G13B_W | S9B_A  | E12B_A | 6.1E-07 | 1.6E-06 | 1.126E-06 | 2.829E-07 |
| 3177 | Y10B_A | L23B_Q | V24B_Q | Q14B_A | 4.7E-07 | 2.1E-06 | 1.126E-06 | 4.767E-07 |
| 3178 | Y10B_A | F3B_A  | I20B_S | G1B_R  | 7.2E-07 | 1.5E-06 | 1.127E-06 | 2.017E-07 |
| 3179 | G13B_A | A16B_N | I20B_Q | S5B_A  | 4.4E-07 | 2.5E-06 | 1.128E-06 | 4.811E-07 |
| 3180 | G13B_A | D6B_A  | I20B_N | S5B_A  | 6.0E-07 | 1.7E-06 | 1.128E-06 | 2.745E-07 |
| 3181 | G13B_A | D6B_A  | E18B_T | L23B_Q | 6.5E-07 | 1.8E-06 | 1.128E-06 | 3.598E-07 |
| 3182 | G13B_A | D6B_A  | L23B_Q | E12B_A | 6.0E-07 | 1.9E-06 | 1.128E-06 | 3.475E-07 |
| 3183 | G13B_A | D6B_A  | F19B_W | V24B_Q | 5.7E-07 | 2.3E-06 | 1.128E-06 | 3.937E-07 |
| 3184 | G13B_A | V7B_A  | E12B_A | V24B_N | 5.8E-07 | 2.0E-06 | 1.130E-06 | 3.787E-07 |
| 3185 | S8B_A  | D6B_A  | I20B_N | E18B_A | 6.2E-07 | 1.7E-06 | 1.131E-06 | 3.033E-07 |
| 3186 | G13B_A | S8B_A  | V7B_A  | I20B_T | 7.1E-07 | 1.6E-06 | 1.131E-06 | 3.013E-07 |
| 3187 | G13B_A | V7B_A  | I20B_Q | K17B_A | 7.1E-07 | 1.9E-06 | 1.131E-06 | 3.850E-07 |
| 3188 | Y10B_A | V7B_A  | I20B_T | E18B_A | 6.8E-07 | 1.8E-06 | 1.131E-06 | 2.779E-07 |
| 3189 | G13B_A | E18B_A | F19B_Q | S9B_A  | 5.1E-07 | 1.6E-06 | 1.132E-06 | 3.488E-07 |
| 3190 | G13B_A | D6B_A  | I20B_Q | S5B_A  | 6.5E-07 | 1.8E-06 | 1.132E-06 | 3.502E-07 |
| 3191 | Y10B_A | G13B_W | I20B_Q | K17B_A | 5.8E-07 | 1.9E-06 | 1.132E-06 | 3.837E-07 |
| 3192 | G13B_A | K17B_S | V24B_T | T2B_A  | 5.1E-07 | 1.6E-06 | 1.132E-06 | 3.271E-07 |
| 3193 | Y10B_A | D6B_A  | V7B_A  | I20B_N | 6.7E-07 | 1.8E-06 | 1.133E-06 | 3.375E-07 |
| 3194 | G13B_A | I20B_S | E18B_A | T4B_A  | 5.0E-07 | 2.1E-06 | 1.133E-06 | 3.807E-07 |
| 3195 | G13B_A | F19B_Q | V24B_T | T2B_A  | 5.4E-07 | 1.7E-06 | 1.133E-06 | 3.543E-07 |
| 3196 | Y10B_A | D6B_A  | I20B_N | G1B_A  | 5.8E-07 | 1.6E-06 | 1.134E-06 | 2.909E-07 |
| 3197 | G13B_A | I20B_S | S5B_A  | G1B_A  | 6.3E-07 | 1.9E-06 | 1.134E-06 | 4.311E-07 |
| 3198 | G13B_A | E18B_A | F19B_W | V24B_T | 5.9E-07 | 1.9E-06 | 1.134E-06 | 3.575E-07 |
| 3199 | G13B_A | L11B_A | V24B_T | E12B_A | 7.2E-07 | 1.7E-06 | 1.134E-06 | 2.683E-07 |
| 3200 | Y10B_A | G1B_R  | F19B_Q | V24B_T | 4.5E-07 | 2.1E-06 | 1.134E-06 | 4.506E-07 |
| 3201 | Y10B_A | E18B_T | F19B_W | L23B_R | 3.7E-07 | 2.4E-06 | 1.135E-06 | 5.492E-07 |
| 3202 | Y10B_A | L11B_A | I20B_S | E18B_A | 6.0E-07 | 2.1E-06 | 1.135E-06 | 3.677E-07 |
| 3203 | G13B_A | L23B_R | E12B_A | G1B_A  | 7.6E-07 | 1.7E-06 | 1.136E-06 | 2.318E-07 |
| 3204 | G13B_A | S8B_A  | F3B_A  | I20B_N | 6.3E-07 | 1.9E-06 | 1.137E-06 | 3.110E-07 |
| 3205 | G13B_A | D6B_A  | E18B_T | V24B_T | 6.4E-07 | 1.7E-06 | 1.137E-06 | 2.846E-07 |
| 3206 | Y10B_A | F3B_A  | I20B_Q | G1B_R  | 6.6E-07 | 1.8E-06 | 1.137E-06 | 3.511E-07 |
| 3207 | Y10B_A | I20B_Q | E18B_A | G1B_A  | 5.5E-07 | 1.8E-06 | 1.137E-06 | 3.689E-07 |
| 3208 | Y10B_A | A16B_N | I20B_N | F19B_A | 5.5E-07 | 2.0E-06 | 1.138E-06 | 4.587E-07 |
| 3209 | Y10B_A | E18B_T | I20B_Q | K17B_A | 5.1E-07 | 1.7E-06 | 1.138E-06 | 3.951E-07 |
| 3210 | G13B_A | S8B_A  | D6B_A  | I20B_N | 6.8E-07 | 1.8E-06 | 1.138E-06 | 4.064E-07 |
| 3211 | G13B_A | Y10B_A | E18B_T | V24B_Q | 5.4E-07 | 1.7E-06 | 1.138E-06 | 3.246E-07 |
| 3212 | Y10B_A | L11B_A | K17B_S | V24B_N | 4.9E-07 | 2.0E-06 | 1.138E-06 | 4.204E-07 |
| 3213 | G13B_A | F3B_A  | I20B_Q | K17B_A | 8.0E-07 | 1.6E-06 | 1.140E-06 | 2.323E-07 |
| 3214 | Y10B_A | V7B_A  | L23B_R | V24B_N | 4.4E-07 | 2.0E-06 | 1.140E-06 | 3.676E-07 |
| 3215 | S8B_A  | D6B_A  | V7B_A  | I20B_S | 4.7E-07 | 1.9E-06 | 1.140E-06 | 3.450E-07 |
| 3216 | Y10B_A | I20B_T | K17B_A | S9B_A  | 5.3E-07 | 1.6E-06 | 1.141E-06 | 2.700E-07 |
| 3217 | G13B_A | S5B_A  | K17B_S | V24B_N | 4.2E-07 | 1.9E-06 | 1.141E-06 | 3.931E-07 |
| 3218 | G13B_A | Y10B_A | F19B_Q | L23B_Q | 3.9E-07 | 1.7E-06 | 1.141E-06 | 3.723E-07 |
| 3219 | Y10B_A | E18B_A | L23B_R | V24B_N | 5.8E-07 | 1.8E-06 | 1.142E-06 | 3.285E-07 |
| 3220 | G13B_A | L11B_A | I20B_S | S5B_A  | 6.3E-07 | 1.5E-06 | 1.142E-06 | 2.830E-07 |
| 3221 | G13B_A | F3B_A  | L23B_Q | E12B_A | 7.4E-07 | 2.0E-06 | 1.142E-06 | 2.861E-07 |
| 3222 | G13B_A | V7B_A  | I20B_S | T4B_A  | 6.0E-07 | 1.7E-06 | 1.143E-06 | 3.247E-07 |
| 3223 | G13B_A | D6B_A  | I20B_T | S5B_A  | 5.5E-07 | 1.6E-06 | 1.143E-06 | 2.975E-07 |

|      |        |        |        |        |         |         |           |           |
|------|--------|--------|--------|--------|---------|---------|-----------|-----------|
| 3224 | Y10B_A | G13B_W | I20B_T | K17B_A | 6.3E-07 | 1.7E-06 | 1.144E-06 | 2.868E-07 |
| 3225 | Y10B_A | D6B_A  | L23B_R | V24B_T | 5.8E-07 | 1.8E-06 | 1.144E-06 | 3.027E-07 |
| 3226 | G13B_A | S8B_A  | V7B_A  | I20B_S | 7.4E-07 | 1.7E-06 | 1.144E-06 | 3.514E-07 |
| 3227 | G13B_A | D6B_A  | I20B_Q | Q14B_A | 6.5E-07 | 2.0E-06 | 1.144E-06 | 3.449E-07 |
| 3228 | G13B_A | Y10B_A | I20B_S | G1B_A  | 5.4E-07 | 2.5E-06 | 1.144E-06 | 4.381E-07 |
| 3229 | G13B_A | T4B_A  | K17B_S | V24B_T | 6.3E-07 | 1.9E-06 | 1.145E-06 | 3.832E-07 |
| 3230 | Y10B_A | G13B_W | F19B_W | S9B_A  | 5.9E-07 | 2.1E-06 | 1.145E-06 | 3.877E-07 |
| 3231 | G13B_A | K17B_A | L23B_R | V24B_Q | 6.8E-07 | 1.8E-06 | 1.145E-06 | 3.263E-07 |
| 3232 | Y10B_A | K17B_S | F19B_A | V24B_T | 4.7E-07 | 2.6E-06 | 1.145E-06 | 4.761E-07 |
| 3233 | Y10B_A | G1B_R  | F19B_Q | V24B_Q | 5.2E-07 | 2.0E-06 | 1.145E-06 | 3.908E-07 |
| 3234 | G13B_A | S8B_A  | I20B_S | G1B_A  | 7.4E-07 | 1.6E-06 | 1.146E-06 | 2.182E-07 |
| 3235 | G13B_A | S8B_A  | D6B_A  | I20B_S | 6.8E-07 | 1.6E-06 | 1.147E-06 | 2.783E-07 |
| 3236 | Y10B_A | G13B_W | V7B_A  | V24B_Q | 4.4E-07 | 1.6E-06 | 1.147E-06 | 3.572E-07 |
| 3237 | G13B_A | D6B_A  | F19B_Q | L23B_R | 3.6E-07 | 2.4E-06 | 1.148E-06 | 4.635E-07 |
| 3238 | Y10B_A | E18B_T | V24B_N | G1B_A  | 6.3E-07 | 2.1E-06 | 1.148E-06 | 4.569E-07 |
| 3239 | G13B_A | S8B_A  | D6B_A  | I20B_T | 6.0E-07 | 1.5E-06 | 1.148E-06 | 2.529E-07 |
| 3240 | Y10B_A | I20B_T | G1B_R  | T2B_A  | 6.6E-07 | 1.7E-06 | 1.148E-06 | 2.468E-07 |
| 3241 | G13B_A | S8B_A  | I20B_T | E18B_A | 6.7E-07 | 1.4E-06 | 1.149E-06 | 2.261E-07 |
| 3242 | G13B_A | Y10B_A | I20B_Q | T4B_A  | 4.2E-07 | 2.5E-06 | 1.150E-06 | 5.268E-07 |
| 3243 | Y10B_A | E18B_A | F19B_Q | V24B_Q | 6.2E-07 | 1.7E-06 | 1.150E-06 | 3.236E-07 |
| 3244 | Y10B_A | A16B_N | S9B_A  | L23B_Q | 2.5E-07 | 2.5E-06 | 1.150E-06 | 6.431E-07 |
| 3245 | Y10B_A | I20B_S | K17B_A | F19B_W | 5.7E-07 | 1.9E-06 | 1.151E-06 | 3.973E-07 |
| 3246 | G13B_A | E12B_A | V24B_N | G1B_A  | 3.7E-07 | 1.7E-06 | 1.152E-06 | 3.312E-07 |
| 3247 | S8B_A  | D6B_A  | I20B_S | G1B_A  | 6.0E-07 | 2.1E-06 | 1.152E-06 | 4.303E-07 |
| 3248 | G13B_A | E18B_A | F19B_W | V24B_N | 5.9E-07 | 2.7E-06 | 1.152E-06 | 4.494E-07 |
| 3249 | G13B_A | F3B_A  | I20B_S | Q14B_A | 6.3E-07 | 1.8E-06 | 1.152E-06 | 2.836E-07 |
| 3250 | Y10B_A | F3B_A  | I20B_N | L11B_A | 6.3E-07 | 1.7E-06 | 1.152E-06 | 3.206E-07 |
| 3251 | Y10B_A | I20B_N | F19B_A | Q14B_A | 6.8E-07 | 2.1E-06 | 1.152E-06 | 4.282E-07 |
| 3252 | Y10B_A | D6B_A  | V7B_A  | I20B_Q | 5.5E-07 | 1.8E-06 | 1.154E-06 | 3.480E-07 |
| 3253 | Y10B_A | G13B_W | I20B_N | K17B_A | 7.0E-07 | 1.7E-06 | 1.154E-06 | 3.419E-07 |
| 3254 | Y10B_A | F3B_A  | K17B_S | V24B_T | 8.0E-07 | 1.9E-06 | 1.155E-06 | 2.872E-07 |
| 3255 | Y10B_A | S5B_A  | L23B_Q | V24B_Q | 5.3E-07 | 1.8E-06 | 1.155E-06 | 3.730E-07 |
| 3256 | Y10B_A | I20B_N | E18B_A | G1B_A  | 4.7E-07 | 2.1E-06 | 1.155E-06 | 4.657E-07 |
| 3257 | G13B_A | F19B_A | V24B_T | E12B_A | 7.2E-07 | 3.3E-06 | 1.156E-06 | 5.531E-07 |
| 3258 | Y10B_A | E18B_T | G1B_R  | V24B_T | 7.3E-07 | 2.2E-06 | 1.156E-06 | 3.782E-07 |
| 3259 | Y10B_A | F19B_Q | L23B_Q | G1B_A  | 7.9E-07 | 1.6E-06 | 1.157E-06 | 2.529E-07 |
| 3260 | G13B_A | D6B_A  | F19B_Q | L23B_Q | 4.0E-07 | 2.2E-06 | 1.157E-06 | 4.719E-07 |
| 3261 | G13B_A | V7B_A  | I20B_S | S5B_A  | 4.6E-07 | 2.1E-06 | 1.159E-06 | 4.087E-07 |
| 3262 | Y10B_A | D6B_A  | V7B_A  | I20B_T | 5.8E-07 | 1.9E-06 | 1.159E-06 | 2.858E-07 |
| 3263 | Y10B_A | F3B_A  | I20B_Q | S5B_A  | 6.7E-07 | 2.5E-06 | 1.160E-06 | 4.857E-07 |
| 3264 | G13B_A | D6B_A  | I20B_S | S5B_A  | 5.5E-07 | 2.4E-06 | 1.160E-06 | 3.953E-07 |
| 3265 | G13B_A | K17B_A | L23B_Q | V24B_Q | 5.5E-07 | 2.5E-06 | 1.160E-06 | 4.803E-07 |
| 3266 | G13B_A | T4B_A  | K17B_S | V24B_N | 5.8E-07 | 1.6E-06 | 1.160E-06 | 3.033E-07 |
| 3267 | G13B_A | E18B_A | L23B_Q | E12B_A | 4.9E-07 | 1.8E-06 | 1.160E-06 | 3.384E-07 |
| 3268 | Y10B_A | I20B_T | E18B_A | G1B_R  | 7.7E-07 | 1.5E-06 | 1.161E-06 | 1.968E-07 |
| 3269 | G13B_A | S8B_A  | I20B_T | Q14B_A | 7.1E-07 | 2.2E-06 | 1.161E-06 | 3.554E-07 |
| 3270 | Y10B_A | V7B_A  | I20B_Q | E18B_A | 5.7E-07 | 1.8E-06 | 1.162E-06 | 3.099E-07 |
| 3271 | Y10B_A | G13B_W | G1B_R  | V24B_N | 4.8E-07 | 2.2E-06 | 1.163E-06 | 4.058E-07 |
| 3272 | Y10B_A | D6B_A  | L11B_A | I20B_Q | 5.5E-07 | 1.8E-06 | 1.163E-06 | 3.904E-07 |
| 3273 | Y10B_A | S8B_A  | A16B_N | I20B_Q | 5.8E-07 | 2.1E-06 | 1.163E-06 | 3.347E-07 |
| 3274 | G13B_A | I20B_N | E18B_A | Q14B_A | 6.0E-07 | 1.9E-06 | 1.163E-06 | 3.395E-07 |
| 3275 | G13B_A | E18B_A | L23B_Q | K17B_S | 3.7E-07 | 1.7E-06 | 1.164E-06 | 3.463E-07 |



|      |        |        |        |        |         |         |           |           |
|------|--------|--------|--------|--------|---------|---------|-----------|-----------|
| 3276 | G13B_A | V7B_A  | V24B_T | E12B_A | 7.2E-07 | 1.7E-06 | 1.165E-06 | 3.235E-07 |
| 3277 | S8B_A  | D6B_A  | I20B_N | L11B_A | 6.8E-07 | 1.6E-06 | 1.165E-06 | 2.821E-07 |
| 3278 | G13B_A | I20B_T | F19B_A | T2B_A  | 4.6E-07 | 2.3E-06 | 1.165E-06 | 4.033E-07 |
| 3279 | G13B_A | D6B_A  | S9B_A  | L23B_R | 6.8E-07 | 1.7E-06 | 1.166E-06 | 2.710E-07 |
| 3280 | Y10B_A | E18B_T | S9B_A  | K17B_S | 7.3E-07 | 1.8E-06 | 1.166E-06 | 3.041E-07 |
| 3281 | G13B_A | D6B_A  | I20B_S | Q14B_A | 5.8E-07 | 2.1E-06 | 1.167E-06 | 3.718E-07 |
| 3282 | Y10B_A | V7B_A  | I20B_N | E18B_A | 6.8E-07 | 2.1E-06 | 1.167E-06 | 3.775E-07 |
| 3283 | G13B_A | E18B_A | S9B_A  | V24B_T | 7.5E-07 | 1.7E-06 | 1.169E-06 | 2.579E-07 |
| 3284 | G13B_A | E18B_T | G1B_R  | K17B_S | 6.6E-07 | 1.6E-06 | 1.169E-06 | 2.705E-07 |
| 3285 | G13B_A | E18B_A | S9B_A  | L23B_R | 6.9E-07 | 2.1E-06 | 1.169E-06 | 3.466E-07 |
| 3286 | Y10B_A | S8B_A  | L23B_R | V24B_N | 6.0E-07 | 2.4E-06 | 1.170E-06 | 4.741E-07 |
| 3287 | Y10B_A | D6B_A  | F19B_Q | V24B_N | 6.0E-07 | 2.2E-06 | 1.171E-06 | 4.862E-07 |
| 3288 | G13B_A | V24B_T | E12B_A | G1B_A  | 6.6E-07 | 2.3E-06 | 1.171E-06 | 3.999E-07 |
| 3289 | Y10B_A | L11B_A | F19B_Q | V24B_N | 4.8E-07 | 2.5E-06 | 1.172E-06 | 5.503E-07 |
| 3290 | G13B_A | Y10B_A | A16B_N | I20B_S | 4.9E-07 | 2.1E-06 | 1.173E-06 | 4.172E-07 |
| 3291 | G13B_A | E18B_T | L11B_A | L23B_R | 7.4E-07 | 1.7E-06 | 1.174E-06 | 2.926E-07 |
| 3292 | Y10B_A | E18B_T | G1B_R  | V24B_Q | 7.3E-07 | 2.1E-06 | 1.174E-06 | 3.146E-07 |
| 3293 | G13B_A | D6B_A  | F19B_W | V24B_T | 8.1E-07 | 1.7E-06 | 1.174E-06 | 2.475E-07 |
| 3294 | G13B_A | L11B_A | I20B_Q | K17B_A | 6.8E-07 | 1.9E-06 | 1.174E-06 | 3.132E-07 |
| 3295 | G13B_A | F19B_Q | E12B_A | G1B_A  | 6.1E-07 | 2.3E-06 | 1.175E-06 | 3.905E-07 |
| 3296 | Y10B_A | S8B_A  | I20B_N | F19B_A | 6.8E-07 | 1.8E-06 | 1.176E-06 | 3.099E-07 |
| 3297 | Y10B_A | L11B_A | I20B_S | G1B_A  | 6.3E-07 | 1.9E-06 | 1.177E-06 | 3.043E-07 |
| 3298 | G13B_A | A16B_N | F19B_Q | L23B_R | 1.1E-07 | 2.2E-06 | 1.178E-06 | 5.934E-07 |
| 3299 | G13B_A | S8B_A  | L11B_A | I20B_S | 6.3E-07 | 1.7E-06 | 1.178E-06 | 3.415E-07 |
| 3300 | Y10B_A | G1B_R  | S9B_A  | V24B_Q | 7.0E-07 | 2.1E-06 | 1.179E-06 | 3.070E-07 |
| 3301 | G13B_A | A16B_N | V24B_T | E12B_A | 4.0E-07 | 1.9E-06 | 1.179E-06 | 4.409E-07 |
| 3302 | Y10B_A | F3B_A  | I20B_N | E18B_A | 5.8E-07 | 1.8E-06 | 1.179E-06 | 4.204E-07 |
| 3303 | Y10B_A | F3B_A  | E18B_T | L23B_Q | 6.5E-07 | 1.8E-06 | 1.179E-06 | 3.070E-07 |
| 3304 | G13B_A | I20B_T | E18B_A | T4B_A  | 5.8E-07 | 2.1E-06 | 1.179E-06 | 3.764E-07 |
| 3305 | G13B_A | I20B_T | Q14B_A | T2B_A  | 8.7E-07 | 1.9E-06 | 1.180E-06 | 2.217E-07 |
| 3306 | G13B_A | D6B_A  | F19B_Q | K17B_S | 5.3E-07 | 3.2E-06 | 1.180E-06 | 6.766E-07 |
| 3307 | Y10B_A | E18B_A | L23B_Q | V24B_N | 6.2E-07 | 2.1E-06 | 1.180E-06 | 3.894E-07 |
| 3308 | Y10B_A | G13B_W | F19B_A | V24B_N | 6.2E-07 | 2.0E-06 | 1.180E-06 | 3.547E-07 |
| 3309 | G13B_A | E18B_A | F19B_W | L23B_Q | 6.1E-07 | 1.9E-06 | 1.181E-06 | 3.868E-07 |
| 3310 | Y10B_A | F3B_A  | L11B_A | I20B_S | 6.3E-07 | 1.8E-06 | 1.182E-06 | 3.449E-07 |
| 3311 | G13B_A | Y10B_A | E18B_T | L23B_Q | 6.8E-07 | 2.3E-06 | 1.182E-06 | 4.428E-07 |
| 3312 | G13B_A | F19B_Q | L23B_Q | T2B_A  | 3.7E-07 | 2.0E-06 | 1.182E-06 | 4.612E-07 |
| 3313 | G13B_A | Y10B_A | I20B_Q | S5B_A  | 6.8E-07 | 2.2E-06 | 1.183E-06 | 4.903E-07 |
| 3314 | Y10B_A | K17B_S | V24B_Q | G1B_A  | 7.1E-07 | 1.7E-06 | 1.184E-06 | 2.830E-07 |
| 3315 | G13B_A | V7B_A  | S9B_A  | L23B_Q | 7.2E-07 | 1.8E-06 | 1.184E-06 | 2.688E-07 |
| 3316 | G13B_A | S9B_A  | L23B_Q | G1B_A  | 4.0E-07 | 1.9E-06 | 1.184E-06 | 3.643E-07 |
| 3317 | Y10B_A | E18B_A | L23B_R | V24B_T | 6.5E-07 | 1.7E-06 | 1.184E-06 | 2.741E-07 |
| 3318 | Y10B_A | D6B_A  | I20B_N | E18B_A | 4.5E-07 | 2.0E-06 | 1.184E-06 | 4.363E-07 |
| 3319 | G13B_A | I20B_Q | K17B_A | G1B_A  | 8.3E-07 | 1.9E-06 | 1.184E-06 | 3.121E-07 |
| 3320 | G13B_A | K17B_A | L23B_Q | V24B_N | 6.5E-07 | 1.8E-06 | 1.185E-06 | 3.413E-07 |
| 3321 | G13B_A | D6B_A  | E12B_A | V24B_N | 5.8E-07 | 1.8E-06 | 1.185E-06 | 3.219E-07 |
| 3322 | Y10B_A | E18B_T | I20B_S | K17B_A | 7.3E-07 | 1.9E-06 | 1.186E-06 | 3.045E-07 |
| 3323 | G13B_A | K17B_A | L23B_R | V24B_N | 5.7E-07 | 1.9E-06 | 1.186E-06 | 3.678E-07 |
| 3324 | G13B_A | D6B_A  | I20B_S | T2B_A  | 6.8E-07 | 1.8E-06 | 1.186E-06 | 3.240E-07 |
| 3325 | Y10B_A | V7B_A  | K17B_S | V24B_T | 8.0E-07 | 1.7E-06 | 1.186E-06 | 3.212E-07 |
| 3326 | G13B_A | V7B_A  | E18B_T | L23B_R | 6.3E-07 | 2.1E-06 | 1.186E-06 | 4.150E-07 |
| 3327 | G13B_A | Y10B_A | I20B_T | E18B_A | 5.5E-07 | 1.6E-06 | 1.187E-06 | 3.376E-07 |

|      |        |        |        |        |         |         |           |           |
|------|--------|--------|--------|--------|---------|---------|-----------|-----------|
| 3328 | G13B_A | K17B_A | F19B_Q | V24B_N | 7.5E-07 | 1.9E-06 | 1.188E-06 | 3.365E-07 |
| 3329 | G13B_A | A16B_N | I20B_S | T4B_A  | 2.7E-07 | 1.9E-06 | 1.188E-06 | 4.416E-07 |
| 3330 | G13B_A | S9B_A  | V24B_Q | T2B_A  | 5.6E-07 | 1.5E-06 | 1.188E-06 | 2.735E-07 |
| 3331 | Y10B_A | I20B_S | T2B_A  | G1B_A  | 7.1E-07 | 1.8E-06 | 1.188E-06 | 3.548E-07 |
| 3332 | G13B_A | L11B_A | V24B_Q | E12B_A | 3.7E-07 | 2.4E-06 | 1.188E-06 | 4.184E-07 |
| 3333 | G13B_A | I20B_S | E18B_A | T2B_A  | 5.8E-07 | 1.9E-06 | 1.189E-06 | 3.914E-07 |
| 3334 | Y10B_A | D6B_A  | E18B_T | V24B_N | 5.9E-07 | 1.9E-06 | 1.189E-06 | 3.718E-07 |
| 3335 | G13B_A | S8B_A  | I20B_N | E18B_A | 5.5E-07 | 2.1E-06 | 1.189E-06 | 3.805E-07 |
| 3336 | Y10B_A | E18B_A | F19B_Q | V24B_N | 4.2E-07 | 2.3E-06 | 1.190E-06 | 5.140E-07 |
| 3337 | Y10B_A | F3B_A  | F19B_Q | L23B_Q | 4.7E-07 | 2.4E-06 | 1.190E-06 | 4.480E-07 |
| 3338 | G13B_A | I20B_Q | E18B_A | K17B_A | 5.3E-07 | 2.0E-06 | 1.191E-06 | 3.625E-07 |
| 3339 | Y10B_A | F19B_Q | L23B_R | E12B_A | 5.2E-07 | 4.1E-06 | 1.191E-06 | 7.644E-07 |
| 3340 | G13B_A | F3B_A  | E18B_T | L23B_R | 5.4E-07 | 2.0E-06 | 1.191E-06 | 4.742E-07 |
| 3341 | Y10B_A | I20B_Q | G1B_R  | S5B_A  | 4.6E-07 | 1.9E-06 | 1.191E-06 | 4.054E-07 |
| 3342 | Y10B_A | I20B_N | G1B_R  | T4B_A  | 8.1E-07 | 2.0E-06 | 1.192E-06 | 3.033E-07 |
| 3343 | Y10B_A | L11B_A | K17B_S | V24B_Q | 6.3E-07 | 2.0E-06 | 1.192E-06 | 4.348E-07 |
| 3344 | Y10B_A | T4B_A  | L23B_R | V24B_N | 5.7E-07 | 2.0E-06 | 1.192E-06 | 3.867E-07 |
| 3345 | Y10B_A | A16B_N | S9B_A  | V24B_N | 2.9E-07 | 3.1E-06 | 1.193E-06 | 6.583E-07 |
| 3346 | G13B_A | S8B_A  | S9B_A  | V24B_Q | 6.6E-07 | 2.0E-06 | 1.194E-06 | 3.435E-07 |
| 3347 | G13B_A | A16B_N | F19B_W | V24B_N | 1.6E-07 | 2.4E-06 | 1.194E-06 | 6.102E-07 |
| 3348 | G13B_A | F19B_W | L23B_Q | G1B_A  | 6.0E-07 | 2.5E-06 | 1.194E-06 | 4.433E-07 |
| 3349 | Y10B_A | I20B_Q | Q14B_A | G1B_A  | 5.8E-07 | 1.8E-06 | 1.195E-06 | 3.828E-07 |
| 3350 | G13B_A | K17B_S | V24B_Q | Q14B_A | 4.9E-07 | 1.9E-06 | 1.195E-06 | 3.734E-07 |
| 3351 | G13B_A | S8B_A  | E18B_T | L23B_Q | 4.1E-07 | 1.9E-06 | 1.195E-06 | 4.001E-07 |
| 3352 | G13B_A | T4B_A  | L23B_R | K17B_S | 7.6E-07 | 2.3E-06 | 1.195E-06 | 3.365E-07 |
| 3353 | G13B_A | D6B_A  | I20B_Q | T2B_A  | 4.0E-07 | 2.3E-06 | 1.196E-06 | 4.895E-07 |
| 3354 | G13B_A | D6B_A  | I20B_T | T4B_A  | 6.8E-07 | 1.8E-06 | 1.196E-06 | 3.461E-07 |
| 3355 | G13B_A | L23B_R | K17B_S | Q14B_A | 6.9E-07 | 1.7E-06 | 1.196E-06 | 2.900E-07 |
| 3356 | G13B_A | I20B_S | K17B_A | F19B_A | 7.3E-07 | 1.9E-06 | 1.197E-06 | 2.806E-07 |
| 3357 | Y10B_A | A16B_N | I20B_Q | S5B_A  | 5.6E-07 | 3.2E-06 | 1.197E-06 | 6.199E-07 |
| 3358 | Y10B_A | L11B_A | L23B_Q | K17B_S | 6.1E-07 | 2.4E-06 | 1.197E-06 | 4.257E-07 |
| 3359 | Y10B_A | D6B_A  | L23B_Q | K17B_S | 7.8E-07 | 1.7E-06 | 1.197E-06 | 3.564E-07 |
| 3360 | Y10B_A | F19B_W | L23B_R | E12B_A | 8.0E-07 | 2.3E-06 | 1.197E-06 | 3.483E-07 |
| 3361 | G13B_A | S5B_A  | K17B_S | V24B_T | 6.9E-07 | 1.9E-06 | 1.197E-06 | 3.557E-07 |
| 3362 | G13B_A | S8B_A  | A16B_N | I20B_S | 2.2E-07 | 1.8E-06 | 1.197E-06 | 4.055E-07 |
| 3363 | G13B_A | E18B_A | F19B_Q | K17B_S | 4.1E-07 | 2.2E-06 | 1.198E-06 | 4.807E-07 |
| 3364 | S8B_A  | G13B_W | V24B_Q | G1B_A  | 7.7E-07 | 1.6E-06 | 1.198E-06 | 2.253E-07 |
| 3365 | G13B_A | V7B_A  | I20B_S | T2B_A  | 4.4E-07 | 1.9E-06 | 1.199E-06 | 4.282E-07 |
| 3366 | G13B_A | F3B_A  | E18B_T | F19B_Q | 4.8E-07 | 2.3E-06 | 1.199E-06 | 3.977E-07 |
| 3367 | G13B_A | S5B_A  | L23B_Q | K17B_S | 6.2E-07 | 2.0E-06 | 1.199E-06 | 3.752E-07 |
| 3368 | G13B_A | V7B_A  | I20B_S | Q14B_A | 5.9E-07 | 1.7E-06 | 1.200E-06 | 3.123E-07 |
| 3369 | G13B_A | T4B_A  | L23B_Q | K17B_S | 3.1E-07 | 2.0E-06 | 1.201E-06 | 3.599E-07 |
| 3370 | Y10B_A | F3B_A  | I20B_Q | T2B_A  | 7.0E-07 | 2.2E-06 | 1.201E-06 | 4.261E-07 |
| 3371 | Y10B_A | L11B_A | K17B_S | V24B_T | 4.7E-07 | 1.7E-06 | 1.201E-06 | 3.044E-07 |
| 3372 | G13B_A | S8B_A  | E18B_T | V24B_N | 6.4E-07 | 2.1E-06 | 1.202E-06 | 3.462E-07 |
| 3373 | G13B_A | G1B_R  | F19B_Q | E12B_A | 4.6E-07 | 2.5E-06 | 1.203E-06 | 5.852E-07 |
| 3374 | Y10B_A | D6B_A  | I20B_S | E18B_A | 8.5E-07 | 1.6E-06 | 1.203E-06 | 2.432E-07 |
| 3375 | G13B_A | E18B_T | F19B_Q | G1B_A  | 6.6E-07 | 2.2E-06 | 1.204E-06 | 3.581E-07 |
| 3376 | Y10B_A | D6B_A  | F3B_A  | I20B_N | 8.0E-07 | 1.8E-06 | 1.204E-06 | 2.524E-07 |
| 3377 | Y10B_A | G1B_R  | F19B_W | V24B_N | 4.1E-07 | 2.2E-06 | 1.206E-06 | 4.673E-07 |
| 3378 | Y10B_A | G13B_W | I20B_S | K17B_A | 6.4E-07 | 1.8E-06 | 1.208E-06 | 3.515E-07 |
| 3379 | Y10B_A | I20B_N | K17B_A | F19B_W | 4.2E-07 | 2.3E-06 | 1.208E-06 | 4.644E-07 |

|      |        |        |        |        |         |         |           |           |
|------|--------|--------|--------|--------|---------|---------|-----------|-----------|
| 3380 | Y10B_A | E18B_T | L11B_A | V24B_N | 6.3E-07 | 2.8E-06 | 1.208E-06 | 5.024E-07 |
| 3381 | G13B_A | E18B_A | L23B_R | K17B_S | 4.6E-07 | 2.1E-06 | 1.208E-06 | 4.006E-07 |
| 3382 | Y10B_A | G1B_R  | S9B_A  | L23B_Q | 6.3E-07 | 2.2E-06 | 1.209E-06 | 3.831E-07 |
| 3383 | Y10B_A | D6B_A  | L11B_A | I20B_S | 7.9E-07 | 1.9E-06 | 1.209E-06 | 3.134E-07 |
| 3384 | Y10B_A | G13B_W | G1B_R  | V24B_T | 8.3E-07 | 1.9E-06 | 1.210E-06 | 2.762E-07 |
| 3385 | G13B_A | A16B_N | F19B_W | V24B_Q | 4.8E-07 | 2.0E-06 | 1.210E-06 | 4.727E-07 |
| 3386 | Y10B_A | I20B_Q | F19B_A | T2B_A  | 6.4E-07 | 1.9E-06 | 1.211E-06 | 4.002E-07 |
| 3387 | G13B_A | S8B_A  | I20B_S | E18B_A | 6.8E-07 | 2.2E-06 | 1.211E-06 | 3.889E-07 |
| 3388 | Y10B_A | F19B_W | S9B_A  | K17B_S | 8.3E-07 | 2.0E-06 | 1.211E-06 | 3.432E-07 |
| 3389 | Y10B_A | T4B_A  | F19B_Q | V24B_Q | 5.1E-07 | 2.1E-06 | 1.211E-06 | 4.265E-07 |
| 3390 | Y10B_A | S8B_A  | L11B_A | I20B_Q | 6.4E-07 | 2.2E-06 | 1.212E-06 | 4.102E-07 |
| 3391 | Y10B_A | K17B_S | F19B_A | V24B_N | 4.7E-07 | 2.2E-06 | 1.213E-06 | 3.944E-07 |
| 3392 | G13B_A | E18B_T | K17B_S | F19B_A | 6.9E-07 | 2.4E-06 | 1.213E-06 | 4.124E-07 |
| 3393 | Y10B_A | L23B_Q | Q14B_A | V24B_N | 5.6E-07 | 2.4E-06 | 1.213E-06 | 4.653E-07 |
| 3394 | G13B_A | E18B_T | V24B_Q | Q14B_A | 5.6E-07 | 2.4E-06 | 1.213E-06 | 5.351E-07 |
| 3395 | G13B_A | A16B_N | F19B_Q | K17B_S | 3.3E-07 | 2.9E-06 | 1.213E-06 | 6.463E-07 |
| 3396 | G13B_A | D6B_A  | I20B_N | Q14B_A | 5.8E-07 | 2.1E-06 | 1.213E-06 | 3.376E-07 |
| 3397 | Y10B_A | S8B_A  | I20B_S | G1B_R  | 7.7E-07 | 1.8E-06 | 1.214E-06 | 2.841E-07 |
| 3398 | G13B_A | Q14B_A | E12B_A | V24B_N | 6.9E-07 | 1.9E-06 | 1.214E-06 | 3.320E-07 |
| 3399 | Y10B_A | L11B_A | F19B_W | V24B_Q | 5.5E-07 | 2.0E-06 | 1.214E-06 | 3.730E-07 |
| 3400 | S8B_A  | D6B_A  | E18B_T | V24B_N | 6.8E-07 | 2.4E-06 | 1.214E-06 | 4.856E-07 |
| 3401 | G13B_A | D6B_A  | V24B_Q | E12B_A | 5.6E-07 | 2.2E-06 | 1.214E-06 | 4.141E-07 |
| 3402 | G13B_A | K17B_S | V24B_T | Q14B_A | 4.9E-07 | 2.0E-06 | 1.215E-06 | 3.330E-07 |
| 3403 | Y10B_A | G13B_W | L11B_A | V24B_T | 8.9E-07 | 2.0E-06 | 1.216E-06 | 2.818E-07 |
| 3404 | S8B_A  | G13B_W | F19B_W | K17B_S | 6.4E-07 | 2.5E-06 | 1.216E-06 | 3.971E-07 |
| 3405 | S8B_A  | D6B_A  | F19B_Q | L23B_Q | 6.5E-07 | 2.0E-06 | 1.216E-06 | 3.671E-07 |
| 3406 | G13B_A | L11B_A | S9B_A  | K17B_S | 6.1E-07 | 1.9E-06 | 1.217E-06 | 2.949E-07 |
| 3407 | Y10B_A | I20B_Q | T4B_A  | G1B_A  | 4.7E-07 | 2.2E-06 | 1.218E-06 | 4.765E-07 |
| 3408 | G13B_A | I20B_N | K17B_A | G1B_A  | 6.1E-07 | 2.2E-06 | 1.218E-06 | 3.786E-07 |
| 3409 | Y10B_A | F3B_A  | I20B_Q | T4B_A  | 5.1E-07 | 2.3E-06 | 1.219E-06 | 5.106E-07 |
| 3410 | S8B_A  | D6B_A  | I20B_S | F19B_A | 5.6E-07 | 2.1E-06 | 1.219E-06 | 3.648E-07 |
| 3411 | Y10B_A | V7B_A  | K17B_S | V24B_N | 8.0E-07 | 1.9E-06 | 1.219E-06 | 2.900E-07 |
| 3412 | Y10B_A | V7B_A  | E18B_T | V24B_Q | 7.5E-07 | 1.8E-06 | 1.220E-06 | 2.940E-07 |
| 3413 | G13B_A | I20B_T | E18B_A | Q14B_A | 6.8E-07 | 2.1E-06 | 1.220E-06 | 3.833E-07 |
| 3414 | Y10B_A | G13B_W | V24B_Q | G1B_A  | 6.4E-07 | 1.9E-06 | 1.220E-06 | 3.352E-07 |
| 3415 | G13B_A | V7B_A  | G1B_R  | V24B_N | 5.5E-07 | 1.8E-06 | 1.221E-06 | 3.532E-07 |
| 3416 | G13B_A | E18B_T | K17B_A | V24B_N | 5.8E-07 | 2.4E-06 | 1.221E-06 | 4.271E-07 |
| 3417 | Y10B_A | I20B_T | T4B_A  | F19B_A | 7.2E-07 | 1.8E-06 | 1.221E-06 | 3.557E-07 |
| 3418 | G13B_A | F19B_Q | V24B_T | Q14B_A | 5.4E-07 | 2.1E-06 | 1.221E-06 | 4.522E-07 |
| 3419 | G13B_A | Y10B_A | I20B_S | E18B_A | 6.1E-07 | 1.9E-06 | 1.221E-06 | 3.261E-07 |
| 3420 | Y10B_A | S8B_A  | I20B_Q | G1B_R  | 5.4E-07 | 1.9E-06 | 1.221E-06 | 4.311E-07 |
| 3421 | G13B_A | G1B_R  | K17B_S | E12B_A | 5.8E-07 | 2.0E-06 | 1.222E-06 | 3.579E-07 |
| 3422 | Y10B_A | G13B_W | V7B_A  | F19B_Q | 7.2E-07 | 2.1E-06 | 1.223E-06 | 3.443E-07 |
| 3423 | S8B_A  | G13B_W | F3B_A  | V24B_Q | 8.5E-07 | 1.8E-06 | 1.223E-06 | 2.239E-07 |
| 3424 | Y10B_A | S8B_A  | V7B_A  | I20B_Q | 6.8E-07 | 1.9E-06 | 1.223E-06 | 3.302E-07 |
| 3425 | G13B_A | F19B_W | L23B_R | G1B_A  | 6.6E-07 | 2.3E-06 | 1.225E-06 | 4.748E-07 |
| 3426 | Y10B_A | A16B_N | L23B_Q | E12B_A | 2.2E-07 | 2.5E-06 | 1.225E-06 | 6.476E-07 |
| 3427 | G13B_A | S8B_A  | K17B_S | V24B_Q | 6.1E-07 | 1.9E-06 | 1.226E-06 | 3.129E-07 |
| 3428 | Y10B_A | G1B_R  | E12B_A | V24B_N | 6.3E-07 | 2.0E-06 | 1.226E-06 | 4.231E-07 |
| 3429 | Y10B_A | G13B_W | V7B_A  | V24B_N | 6.2E-07 | 1.9E-06 | 1.226E-06 | 3.874E-07 |
| 3430 | Y10B_A | G1B_R  | V24B_Q | E12B_A | 7.1E-07 | 2.1E-06 | 1.228E-06 | 3.555E-07 |
| 3431 | G13B_A | I20B_Q | Q14B_A | T2B_A  | 7.1E-07 | 2.2E-06 | 1.228E-06 | 4.012E-07 |

|      |        |        |        |        |         |         |           |           |
|------|--------|--------|--------|--------|---------|---------|-----------|-----------|
| 3432 | G13B_A | S8B_A  | F19B_Q | V24B_Q | 7.5E-07 | 2.3E-06 | 1.228E-06 | 4.030E-07 |
| 3433 | G13B_A | S9B_A  | T2B_A  | V24B_N | 5.4E-07 | 2.8E-06 | 1.228E-06 | 4.858E-07 |
| 3434 | Y10B_A | L11B_A | I20B_Q | S5B_A  | 5.8E-07 | 2.4E-06 | 1.228E-06 | 4.833E-07 |
| 3435 | Y10B_A | I20B_Q | F19B_A | Q14B_A | 5.5E-07 | 1.8E-06 | 1.229E-06 | 3.539E-07 |
| 3436 | Y10B_A | G13B_W | F3B_A  | V24B_N | 7.3E-07 | 1.9E-06 | 1.229E-06 | 3.475E-07 |
| 3437 | G13B_A | I20B_T | K17B_A | F19B_A | 6.2E-07 | 3.0E-06 | 1.230E-06 | 5.096E-07 |
| 3438 | G13B_A | D6B_A  | I20B_N | T2B_A  | 5.8E-07 | 1.9E-06 | 1.230E-06 | 3.057E-07 |
| 3439 | Y10B_A | S9B_A  | F19B_A | V24B_Q | 5.2E-07 | 2.2E-06 | 1.230E-06 | 3.655E-07 |
| 3440 | Y10B_A | S5B_A  | L23B_Q | V24B_N | 6.5E-07 | 2.4E-06 | 1.230E-06 | 4.308E-07 |
| 3441 | Y10B_A | I20B_T | F19B_A | T2B_A  | 5.8E-07 | 1.9E-06 | 1.230E-06 | 3.635E-07 |
| 3442 | G13B_A | E18B_T | S5B_A  | V24B_N | 5.1E-07 | 2.1E-06 | 1.230E-06 | 4.232E-07 |
| 3443 | Y10B_A | G1B_R  | F19B_W | V24B_T | 7.1E-07 | 1.9E-06 | 1.231E-06 | 3.035E-07 |
| 3444 | Y10B_A | E18B_A | L23B_Q | K17B_S | 6.7E-07 | 2.1E-06 | 1.231E-06 | 4.213E-07 |
| 3445 | Y10B_A | I20B_Q | S5B_A  | F19B_A | 5.1E-07 | 2.1E-06 | 1.231E-06 | 4.610E-07 |
| 3446 | Y10B_A | I20B_N | L11B_A | E18B_A | 6.3E-07 | 2.1E-06 | 1.231E-06 | 3.510E-07 |
| 3447 | Y10B_A | S9B_A  | K17B_S | E12B_A | 5.7E-07 | 2.6E-06 | 1.232E-06 | 4.973E-07 |
| 3448 | S8B_A  | D6B_A  | I20B_T | L11B_A | 8.0E-07 | 1.9E-06 | 1.232E-06 | 2.929E-07 |
| 3449 | G13B_A | V7B_A  | E18B_T | F19B_Q | 5.7E-07 | 2.3E-06 | 1.232E-06 | 4.565E-07 |
| 3450 | G13B_A | S5B_A  | L23B_R | K17B_S | 6.1E-07 | 2.3E-06 | 1.233E-06 | 4.285E-07 |
| 3451 | Y10B_A | L23B_R | F19B_A | V24B_T | 7.1E-07 | 1.8E-06 | 1.233E-06 | 3.235E-07 |
| 3452 | Y10B_A | I20B_N | L11B_A | T4B_A  | 8.2E-07 | 1.9E-06 | 1.233E-06 | 3.141E-07 |
| 3453 | G13B_A | G1B_R  | F19B_W | K17B_S | 4.7E-07 | 1.8E-06 | 1.233E-06 | 3.458E-07 |
| 3454 | G13B_A | S9B_A  | L23B_R | F19B_A | 7.6E-07 | 2.1E-06 | 1.234E-06 | 3.322E-07 |
| 3455 | Y10B_A | V7B_A  | E18B_T | V24B_N | 5.4E-07 | 2.1E-06 | 1.234E-06 | 4.631E-07 |
| 3456 | Y10B_A | D6B_A  | I20B_Q | E18B_A | 7.0E-07 | 2.9E-06 | 1.234E-06 | 5.365E-07 |
| 3457 | Y10B_A | D6B_A  | F19B_Q | V24B_T | 5.1E-07 | 2.3E-06 | 1.234E-06 | 5.121E-07 |
| 3458 | Y10B_A | S8B_A  | F19B_Q | V24B_N | 4.9E-07 | 2.4E-06 | 1.235E-06 | 5.768E-07 |
| 3459 | Y10B_A | V24B_Q | E12B_A | G1B_A  | 7.1E-07 | 2.1E-06 | 1.236E-06 | 3.464E-07 |
| 3460 | G13B_A | I20B_T | E18B_A | T2B_A  | 5.8E-07 | 1.8E-06 | 1.236E-06 | 2.579E-07 |
| 3461 | Y10B_A | T4B_A  | L23B_R | V24B_Q | 5.7E-07 | 2.0E-06 | 1.237E-06 | 3.766E-07 |
| 3462 | Y10B_A | L23B_Q | V24B_T | T2B_A  | 4.5E-07 | 2.7E-06 | 1.237E-06 | 4.823E-07 |
| 3463 | Y10B_A | A16B_N | I20B_T | S5B_A  | 5.0E-07 | 2.4E-06 | 1.238E-06 | 5.194E-07 |
| 3464 | S8B_A  | G13B_W | G1B_R  | L23B_Q | 5.3E-07 | 1.7E-06 | 1.238E-06 | 3.436E-07 |
| 3465 | Y10B_A | A16B_N | I20B_T | E18B_A | 4.0E-07 | 2.0E-06 | 1.238E-06 | 5.464E-07 |
| 3466 | Y10B_A | I20B_N | G1B_R  | S5B_A  | 6.6E-07 | 2.1E-06 | 1.238E-06 | 3.651E-07 |
| 3467 | Y10B_A | I20B_T | S5B_A  | F19B_A | 6.1E-07 | 1.9E-06 | 1.238E-06 | 4.087E-07 |
| 3468 | S8B_A  | G13B_W | L11B_A | L23B_R | 9.1E-07 | 1.5E-06 | 1.238E-06 | 2.009E-07 |
| 3469 | G13B_A | V7B_A  | L23B_R | E12B_A | 7.3E-07 | 1.8E-06 | 1.239E-06 | 2.828E-07 |
| 3470 | G13B_A | T4B_A  | K17B_S | V24B_Q | 7.1E-07 | 1.9E-06 | 1.239E-06 | 3.351E-07 |
| 3471 | G13B_A | S5B_A  | K17B_S | V24B_Q | 4.9E-07 | 2.0E-06 | 1.239E-06 | 4.012E-07 |
| 3472 | G13B_A | Y10B_A | K17B_S | V24B_T | 6.5E-07 | 2.3E-06 | 1.239E-06 | 3.997E-07 |
| 3473 | Y10B_A | G13B_W | L11B_A | V24B_N | 7.3E-07 | 2.2E-06 | 1.239E-06 | 4.444E-07 |
| 3474 | G13B_A | Y10B_A | I20B_Q | Q14B_A | 6.0E-07 | 2.2E-06 | 1.239E-06 | 5.464E-07 |
| 3475 | G13B_A | I20B_Q | S5B_A  | Q14B_A | 3.6E-07 | 1.9E-06 | 1.240E-06 | 4.383E-07 |
| 3476 | G13B_A | F19B_W | K17B_S | G1B_A  | 6.6E-07 | 2.3E-06 | 1.240E-06 | 4.560E-07 |
| 3477 | Y10B_A | I20B_S | E18B_A | G1B_A  | 6.0E-07 | 1.8E-06 | 1.241E-06 | 3.443E-07 |
| 3478 | Y10B_A | G13B_W | G1B_R  | V24B_Q | 5.8E-07 | 3.0E-06 | 1.241E-06 | 5.166E-07 |
| 3479 | Y10B_A | L23B_Q | V24B_Q | T2B_A  | 5.5E-07 | 1.9E-06 | 1.242E-06 | 4.145E-07 |
| 3480 | G13B_A | I20B_N | S5B_A  | Q14B_A | 7.1E-07 | 2.5E-06 | 1.242E-06 | 4.421E-07 |
| 3481 | G13B_A | V7B_A  | I20B_N | K17B_A | 7.4E-07 | 1.9E-06 | 1.242E-06 | 3.538E-07 |
| 3482 | Y10B_A | S5B_A  | L23B_R | V24B_T | 6.7E-07 | 1.8E-06 | 1.243E-06 | 3.051E-07 |
| 3483 | G13B_A | Y10B_A | E18B_T | V24B_T | 7.8E-07 | 2.1E-06 | 1.243E-06 | 4.140E-07 |

|      |        |        |        |        |         |         |           |           |
|------|--------|--------|--------|--------|---------|---------|-----------|-----------|
| 3484 | G13B_A | S8B_A  | E18B_T | V24B_Q | 5.4E-07 | 2.1E-06 | 1.243E-06 | 4.641E-07 |
| 3485 | Y10B_A | L23B_R | Q14B_A | V24B_N | 7.9E-07 | 2.2E-06 | 1.244E-06 | 3.428E-07 |
| 3486 | Y10B_A | V7B_A  | L23B_Q | K17B_S | 4.3E-07 | 1.9E-06 | 1.244E-06 | 3.940E-07 |
| 3487 | Y10B_A | L23B_R | V24B_Q | T2B_A  | 6.5E-07 | 1.9E-06 | 1.244E-06 | 4.138E-07 |
| 3488 | Y10B_A | A16B_N | I20B_Q | T4B_A  | 2.4E-07 | 2.4E-06 | 1.245E-06 | 5.931E-07 |
| 3489 | Y10B_A | A16B_N | E18B_T | V24B_Q | 2.7E-07 | 2.3E-06 | 1.245E-06 | 6.035E-07 |
| 3490 | S8B_A  | D6B_A  | S9B_A  | L23B_Q | 4.1E-07 | 2.1E-06 | 1.245E-06 | 4.337E-07 |
| 3491 | Y10B_A | G13B_W | K17B_S | E12B_A | 5.9E-07 | 2.2E-06 | 1.246E-06 | 3.502E-07 |
| 3492 | Y10B_A | V7B_A  | F19B_W | V24B_T | 6.4E-07 | 2.1E-06 | 1.246E-06 | 3.634E-07 |
| 3493 | Y10B_A | F19B_W | L23B_Q | G1B_A  | 6.3E-07 | 2.0E-06 | 1.247E-06 | 3.957E-07 |
| 3494 | S8B_A  | G13B_W | G1B_R  | L23B_R | 7.5E-07 | 2.3E-06 | 1.247E-06 | 4.106E-07 |
| 3495 | S8B_A  | G13B_W | F19B_A | V24B_N | 6.2E-07 | 2.3E-06 | 1.248E-06 | 4.664E-07 |
| 3496 | Y10B_A | G1B_R  | F19B_Q | K17B_S | 3.9E-07 | 2.3E-06 | 1.249E-06 | 5.407E-07 |
| 3497 | G13B_A | I20B_N | G1B_R  | K17B_A | 7.0E-07 | 2.0E-06 | 1.249E-06 | 4.319E-07 |
| 3498 | G13B_A | I20B_N | T4B_A  | T2B_A  | 8.3E-07 | 2.2E-06 | 1.249E-06 | 3.404E-07 |
| 3499 | G13B_A | I20B_S | E18B_A | S5B_A  | 6.5E-07 | 2.0E-06 | 1.249E-06 | 3.608E-07 |
| 3500 | G13B_A | A16B_N | I20B_T | Q14B_A | 6.4E-07 | 2.5E-06 | 1.250E-06 | 4.673E-07 |
| 3501 | S8B_A  | D6B_A  | I20B_S | E18B_A | 8.5E-07 | 2.1E-06 | 1.252E-06 | 3.758E-07 |
| 3502 | Y10B_A | G13B_W | E18B_A | V24B_N | 5.4E-07 | 2.1E-06 | 1.252E-06 | 3.206E-07 |
| 3503 | S8B_A  | D6B_A  | I20B_N | G1B_A  | 8.0E-07 | 1.8E-06 | 1.252E-06 | 2.469E-07 |
| 3504 | G13B_A | F3B_A  | F19B_Q | S9B_A  | 5.7E-07 | 2.2E-06 | 1.253E-06 | 5.100E-07 |
| 3505 | G13B_A | S9B_A  | L23B_Q | Q14B_A | 6.8E-07 | 2.3E-06 | 1.253E-06 | 4.460E-07 |
| 3506 | G13B_A | I20B_N | E18B_A | S5B_A  | 5.5E-07 | 1.8E-06 | 1.254E-06 | 3.606E-07 |
| 3507 | Y10B_A | G13B_W | L23B_R | G1B_A  | 8.1E-07 | 1.8E-06 | 1.254E-06 | 2.728E-07 |
| 3508 | G13B_A | G1B_R  | S9B_A  | K17B_S | 7.4E-07 | 1.8E-06 | 1.255E-06 | 3.268E-07 |
| 3509 | Y10B_A | F19B_Q | V24B_T | Q14B_A | 6.6E-07 | 2.5E-06 | 1.255E-06 | 5.316E-07 |
| 3510 | G13B_A | I20B_T | K17B_A | G1B_A  | 6.8E-07 | 1.8E-06 | 1.255E-06 | 2.899E-07 |
| 3511 | Y10B_A | G1B_R  | L23B_R | K17B_S | 7.0E-07 | 1.9E-06 | 1.256E-06 | 3.830E-07 |
| 3512 | Y10B_A | G13B_W | E18B_T | S9B_A  | 8.2E-07 | 2.1E-06 | 1.257E-06 | 3.084E-07 |
| 3513 | Y10B_A | D6B_A  | I20B_Q | T2B_A  | 5.0E-07 | 2.3E-06 | 1.258E-06 | 4.077E-07 |
| 3514 | G13B_A | E18B_T | L23B_R | T2B_A  | 4.9E-07 | 1.9E-06 | 1.258E-06 | 3.640E-07 |
| 3515 | G13B_A | V7B_A  | E18B_T | K17B_S | 7.1E-07 | 2.4E-06 | 1.258E-06 | 4.365E-07 |
| 3516 | Y10B_A | S9B_A  | F19B_A | V24B_N | 6.3E-07 | 2.1E-06 | 1.258E-06 | 4.513E-07 |
| 3517 | G13B_A | G1B_R  | L23B_Q | E12B_A | 6.1E-07 | 2.2E-06 | 1.259E-06 | 4.429E-07 |
| 3518 | G13B_A | E18B_T | T2B_A  | V24B_N | 7.8E-07 | 1.8E-06 | 1.259E-06 | 3.301E-07 |
| 3519 | G13B_A | I20B_N | L11B_A | K17B_A | 7.5E-07 | 2.2E-06 | 1.259E-06 | 3.588E-07 |
| 3520 | G13B_A | V7B_A  | F19B_Q | E12B_A | 4.2E-07 | 2.3E-06 | 1.259E-06 | 4.943E-07 |
| 3521 | S8B_A  | D6B_A  | E18B_T | V24B_Q | 4.2E-07 | 2.6E-06 | 1.259E-06 | 4.947E-07 |
| 3522 | G13B_A | G1B_R  | F19B_A | V24B_Q | 9.1E-07 | 2.0E-06 | 1.259E-06 | 3.284E-07 |
| 3523 | Y10B_A | V7B_A  | I20B_Q | S5B_A  | 3.7E-07 | 2.2E-06 | 1.259E-06 | 5.103E-07 |
| 3524 | G13B_A | D6B_A  | L23B_R | E12B_A | 8.6E-07 | 2.0E-06 | 1.260E-06 | 3.366E-07 |
| 3525 | Y10B_A | G13B_W | L11B_A | L23B_R | 7.7E-07 | 2.1E-06 | 1.261E-06 | 3.537E-07 |
| 3526 | Y10B_A | S8B_A  | I20B_T | F19B_A | 5.5E-07 | 2.4E-06 | 1.261E-06 | 5.239E-07 |
| 3527 | Y10B_A | G13B_W | L23B_Q | F19B_A | 6.7E-07 | 2.1E-06 | 1.262E-06 | 4.194E-07 |
| 3528 | Y10B_A | E18B_A | K17B_S | V24B_Q | 6.1E-07 | 1.7E-06 | 1.262E-06 | 3.033E-07 |
| 3529 | G13B_A | E18B_T | L11B_A | K17B_S | 6.5E-07 | 2.4E-06 | 1.262E-06 | 4.062E-07 |
| 3530 | G13B_A | S5B_A  | F19B_W | V24B_N | 5.9E-07 | 2.2E-06 | 1.262E-06 | 4.187E-07 |
| 3531 | G13B_A | F3B_A  | I20B_T | K17B_A | 6.0E-07 | 2.2E-06 | 1.262E-06 | 4.169E-07 |
| 3532 | Y10B_A | V7B_A  | I20B_N | T2B_A  | 5.1E-07 | 1.9E-06 | 1.263E-06 | 4.049E-07 |
| 3533 | G13B_A | A16B_N | F19B_Q | S9B_A  | 2.6E-07 | 2.9E-06 | 1.263E-06 | 6.441E-07 |
| 3534 | S8B_A  | G13B_W | F19B_W | L23B_R | 5.0E-07 | 2.1E-06 | 1.263E-06 | 3.980E-07 |
| 3535 | Y10B_A | I20B_Q | T2B_A  | G1B_A  | 6.8E-07 | 2.5E-06 | 1.264E-06 | 5.262E-07 |

|      |        |        |        |        |         |         |           |           |
|------|--------|--------|--------|--------|---------|---------|-----------|-----------|
| 3536 | Y10B_A | I20B_Q | G1B_R  | Q14B_A | 4.6E-07 | 2.0E-06 | 1.264E-06 | 4.468E-07 |
| 3537 | G13B_A | D6B_A  | V24B_T | E12B_A | 8.0E-07 | 2.3E-06 | 1.266E-06 | 3.829E-07 |
| 3538 | S8B_A  | G13B_W | V24B_N | G1B_A  | 6.2E-07 | 2.2E-06 | 1.266E-06 | 3.645E-07 |
| 3539 | S8B_A  | G13B_W | F19B_A | V24B_T | 7.0E-07 | 2.3E-06 | 1.266E-06 | 4.581E-07 |
| 3540 | G13B_A | Y10B_A | E18B_T | V24B_N | 6.4E-07 | 2.4E-06 | 1.266E-06 | 4.865E-07 |
| 3541 | Y10B_A | G13B_W | E18B_T | E12B_A | 8.0E-07 | 2.1E-06 | 1.267E-06 | 3.867E-07 |
| 3542 | Y10B_A | I20B_N | G1B_R  | T2B_A  | 4.6E-07 | 2.0E-06 | 1.267E-06 | 3.504E-07 |
| 3543 | G13B_A | S5B_A  | S9B_A  | V24B_Q | 6.1E-07 | 2.0E-06 | 1.268E-06 | 3.563E-07 |
| 3544 | S8B_A  | D6B_A  | L23B_Q | K17B_S | 6.7E-07 | 2.6E-06 | 1.268E-06 | 4.691E-07 |
| 3545 | Y10B_A | S8B_A  | I20B_T | G1B_R  | 7.7E-07 | 1.8E-06 | 1.268E-06 | 2.994E-07 |
| 3546 | G13B_A | L11B_A | G1B_R  | V24B_N | 7.9E-07 | 1.9E-06 | 1.268E-06 | 3.476E-07 |
| 3547 | S8B_A  | D6B_A  | A16B_N | I20B_T | 2.7E-07 | 2.2E-06 | 1.269E-06 | 5.052E-07 |
| 3548 | Y10B_A | L11B_A | S9B_A  | V24B_Q | 6.3E-07 | 2.4E-06 | 1.269E-06 | 4.360E-07 |
| 3549 | Y10B_A | F19B_Q | Q14B_A | V24B_N | 5.1E-07 | 2.5E-06 | 1.269E-06 | 5.955E-07 |
| 3550 | G13B_A | I20B_N | K17B_A | F19B_A | 7.2E-07 | 2.0E-06 | 1.270E-06 | 3.615E-07 |
| 3551 | Y10B_A | T4B_A  | L23B_Q | V24B_N | 4.2E-07 | 2.4E-06 | 1.270E-06 | 5.032E-07 |
| 3552 | G13B_A | V7B_A  | F19B_W | L23B_R | 4.7E-07 | 2.0E-06 | 1.270E-06 | 3.909E-07 |
| 3553 | S8B_A  | G13B_W | A16B_N | V24B_Q | 3.9E-07 | 2.2E-06 | 1.272E-06 | 5.084E-07 |
| 3554 | G13B_A | T4B_A  | S9B_A  | V24B_Q | 8.7E-07 | 1.7E-06 | 1.272E-06 | 2.166E-07 |
| 3555 | G13B_A | V7B_A  | F19B_W | K17B_S | 4.6E-07 | 2.1E-06 | 1.272E-06 | 3.549E-07 |
| 3556 | Y10B_A | S8B_A  | I20B_S | F19B_A | 6.8E-07 | 2.1E-06 | 1.272E-06 | 3.740E-07 |
| 3557 | G13B_A | S8B_A  | K17B_S | V24B_N | 7.3E-07 | 2.0E-06 | 1.273E-06 | 3.517E-07 |
| 3558 | G13B_A | F19B_Q | L23B_R | Q14B_A | 5.3E-07 | 2.1E-06 | 1.273E-06 | 3.838E-07 |
| 3559 | G13B_A | V7B_A  | A16B_N | V24B_N | 3.1E-07 | 2.2E-06 | 1.274E-06 | 5.991E-07 |
| 3560 | G13B_A | E18B_T | S5B_A  | V24B_T | 7.8E-07 | 2.6E-06 | 1.274E-06 | 4.693E-07 |
| 3561 | Y10B_A | I20B_Q | G1B_R  | T2B_A  | 6.9E-07 | 2.4E-06 | 1.274E-06 | 4.915E-07 |
| 3562 | Y10B_A | F3B_A  | F19B_W | V24B_N | 8.5E-07 | 2.4E-06 | 1.275E-06 | 3.941E-07 |
| 3563 | S8B_A  | G13B_W | L23B_Q | G1B_A  | 5.4E-07 | 2.5E-06 | 1.275E-06 | 4.620E-07 |
| 3564 | Y10B_A | L11B_A | S9B_A  | L23B_Q | 6.8E-07 | 2.2E-06 | 1.275E-06 | 4.259E-07 |
| 3565 | Y10B_A | V7B_A  | S9B_A  | V24B_N | 6.6E-07 | 2.4E-06 | 1.276E-06 | 4.336E-07 |
| 3566 | G13B_A | F19B_W | T4B_A  | V24B_T | 7.3E-07 | 2.0E-06 | 1.276E-06 | 3.632E-07 |
| 3567 | Y10B_A | E18B_T | L11B_A | V24B_Q | 7.7E-07 | 2.3E-06 | 1.277E-06 | 4.044E-07 |
| 3568 | Y10B_A | I20B_N | S5B_A  | F19B_A | 8.0E-07 | 2.4E-06 | 1.277E-06 | 4.234E-07 |
| 3569 | G13B_A | K17B_S | Q14B_A | V24B_N | 6.0E-07 | 2.3E-06 | 1.277E-06 | 4.444E-07 |
| 3570 | Y10B_A | I20B_N | E18B_A | T4B_A  | 7.3E-07 | 2.3E-06 | 1.277E-06 | 3.941E-07 |
| 3571 | Y10B_A | F3B_A  | S9B_A  | L23B_Q | 5.3E-07 | 2.0E-06 | 1.278E-06 | 3.832E-07 |
| 3572 | S8B_A  | V7B_A  | I20B_N | E18B_A | 4.7E-07 | 2.1E-06 | 1.278E-06 | 3.754E-07 |
| 3573 | Y10B_A | I20B_S | S5B_A  | F19B_A | 5.5E-07 | 2.1E-06 | 1.278E-06 | 4.275E-07 |
| 3574 | Y10B_A | I20B_N | Q14B_A | G1B_A  | 7.1E-07 | 1.9E-06 | 1.279E-06 | 3.983E-07 |
| 3575 | Y10B_A | I20B_N | K17B_A | E12B_A | 5.4E-07 | 1.7E-06 | 1.279E-06 | 3.569E-07 |
| 3576 | Y10B_A | F19B_A | E12B_A | V24B_N | 7.1E-07 | 2.2E-06 | 1.280E-06 | 3.921E-07 |
| 3577 | S8B_A  | D6B_A  | G13B_W | V24B_Q | 6.7E-07 | 1.7E-06 | 1.280E-06 | 2.671E-07 |
| 3578 | G13B_A | F19B_Q | K17B_S | T2B_A  | 5.8E-07 | 3.9E-06 | 1.280E-06 | 7.241E-07 |
| 3579 | Y10B_A | I20B_T | E18B_A | T2B_A  | 6.2E-07 | 1.7E-06 | 1.280E-06 | 3.363E-07 |
| 3580 | G13B_A | A16B_N | G1B_R  | V24B_N | 5.3E-07 | 2.3E-06 | 1.281E-06 | 5.387E-07 |
| 3581 | G13B_A | E18B_A | G1B_R  | V24B_Q | 7.3E-07 | 2.0E-06 | 1.281E-06 | 3.144E-07 |
| 3582 | G13B_A | V7B_A  | I20B_S | K17B_A | 8.4E-07 | 1.9E-06 | 1.281E-06 | 3.671E-07 |
| 3583 | Y10B_A | D6B_A  | F19B_Q | L23B_Q | 5.1E-07 | 2.1E-06 | 1.282E-06 | 4.521E-07 |
| 3584 | G13B_A | I20B_T | L11B_A | K17B_A | 6.1E-07 | 1.9E-06 | 1.282E-06 | 3.863E-07 |
| 3585 | G13B_A | E18B_T | L23B_Q | Q14B_A | 7.7E-07 | 2.8E-06 | 1.283E-06 | 5.254E-07 |
| 3586 | G13B_A | F3B_A  | V24B_N | G1B_A  | 7.8E-07 | 2.0E-06 | 1.283E-06 | 3.202E-07 |
| 3587 | G13B_A | S9B_A  | V24B_Q | Q14B_A | 6.7E-07 | 1.7E-06 | 1.284E-06 | 3.258E-07 |

|      |        |        |        |        |         |         |           |           |
|------|--------|--------|--------|--------|---------|---------|-----------|-----------|
| 3588 | S8B_A  | G13B_W | K17B_S | E12B_A | 7.6E-07 | 2.6E-06 | 1.284E-06 | 4.423E-07 |
| 3589 | G13B_A | V7B_A  | A16B_N | V24B_Q | 2.7E-07 | 2.8E-06 | 1.285E-06 | 7.489E-07 |
| 3590 | Y10B_A | A16B_N | F19B_Q | L23B_R | 2.5E-07 | 2.6E-06 | 1.286E-06 | 6.490E-07 |
| 3591 | S8B_A  | D6B_A  | I20B_T | E18B_A | 7.3E-07 | 1.9E-06 | 1.286E-06 | 2.352E-07 |
| 3592 | G13B_A | L23B_Q | K17B_S | Q14B_A | 6.2E-07 | 2.5E-06 | 1.286E-06 | 4.710E-07 |
| 3593 | G13B_A | T4B_A  | S9B_A  | V24B_T | 8.5E-07 | 2.4E-06 | 1.286E-06 | 3.208E-07 |
| 3594 | Y10B_A | D6B_A  | I20B_T | T4B_A  | 6.2E-07 | 2.0E-06 | 1.286E-06 | 3.400E-07 |
| 3595 | G13B_A | E18B_T | G1B_R  | S9B_A  | 7.0E-07 | 1.9E-06 | 1.287E-06 | 3.356E-07 |
| 3596 | G13B_A | L23B_R | K17B_S | T2B_A  | 5.0E-07 | 3.0E-06 | 1.287E-06 | 6.057E-07 |
| 3597 | S8B_A  | D6B_A  | K17B_S | V24B_Q | 7.6E-07 | 1.9E-06 | 1.287E-06 | 3.507E-07 |
| 3598 | G13B_A | Y10B_A | S9B_A  | V24B_Q | 6.3E-07 | 1.8E-06 | 1.288E-06 | 3.158E-07 |
| 3599 | G13B_A | S8B_A  | F19B_Q | L23B_Q | 5.8E-07 | 2.5E-06 | 1.288E-06 | 5.119E-07 |
| 3600 | Y10B_A | E18B_T | S9B_A  | E12B_A | 6.2E-07 | 2.7E-06 | 1.288E-06 | 4.634E-07 |
| 3601 | G13B_A | Y10B_A | I20B_Q | T2B_A  | 5.8E-07 | 1.9E-06 | 1.289E-06 | 4.289E-07 |
| 3602 | S8B_A  | G13B_W | F3B_A  | L23B_Q | 5.7E-07 | 2.4E-06 | 1.289E-06 | 4.565E-07 |
| 3603 | G13B_A | Y10B_A | F19B_Q | L23B_R | 6.7E-07 | 2.6E-06 | 1.289E-06 | 4.844E-07 |
| 3604 | G13B_A | T4B_A  | S9B_A  | V24B_N | 7.5E-07 | 2.4E-06 | 1.290E-06 | 3.658E-07 |
| 3605 | S8B_A  | G13B_W | A16B_N | V24B_N | 4.2E-07 | 2.4E-06 | 1.290E-06 | 5.498E-07 |
| 3606 | G13B_A | K17B_A | L23B_R | V24B_T | 6.0E-07 | 1.9E-06 | 1.290E-06 | 3.124E-07 |
| 3607 | G13B_A | F19B_W | Q14B_A | V24B_N | 5.9E-07 | 2.3E-06 | 1.290E-06 | 4.766E-07 |
| 3608 | G13B_A | S5B_A  | F19B_W | L23B_Q | 6.3E-07 | 2.2E-06 | 1.291E-06 | 4.611E-07 |
| 3609 | Y10B_A | I20B_T | F19B_A | Q14B_A | 8.0E-07 | 2.2E-06 | 1.291E-06 | 4.116E-07 |
| 3610 | Y10B_A | F3B_A  | I20B_S | S5B_A  | 8.3E-07 | 1.9E-06 | 1.292E-06 | 3.310E-07 |
| 3611 | G13B_A | E18B_A | E12B_A | V24B_N | 5.6E-07 | 2.5E-06 | 1.292E-06 | 4.206E-07 |
| 3612 | S8B_A  | G13B_W | V7B_A  | V24B_T | 7.3E-07 | 2.0E-06 | 1.292E-06 | 2.756E-07 |
| 3613 | G13B_A | F19B_W | T2B_A  | V24B_N | 7.3E-07 | 2.3E-06 | 1.292E-06 | 4.556E-07 |
| 3614 | S8B_A  | D6B_A  | S9B_A  | V24B_N | 4.0E-07 | 1.9E-06 | 1.293E-06 | 3.673E-07 |
| 3615 | Y10B_A | L11B_A | F19B_W | L23B_Q | 7.8E-07 | 2.4E-06 | 1.294E-06 | 4.114E-07 |
| 3616 | G13B_A | F3B_A  | E18B_T | K17B_S | 4.9E-07 | 2.4E-06 | 1.294E-06 | 5.161E-07 |
| 3617 | G13B_A | I20B_S | G1B_R  | K17B_A | 7.8E-07 | 2.2E-06 | 1.294E-06 | 3.804E-07 |
| 3618 | Y10B_A | I20B_Q | G1B_R  | T4B_A  | 5.4E-07 | 2.0E-06 | 1.294E-06 | 3.892E-07 |
| 3619 | G13B_A | F19B_W | T4B_A  | L23B_Q | 6.3E-07 | 2.2E-06 | 1.295E-06 | 5.047E-07 |
| 3620 | G13B_A | A16B_N | I20B_T | K17B_A | 4.0E-07 | 2.4E-06 | 1.295E-06 | 5.483E-07 |
| 3621 | Y10B_A | A16B_N | I20B_S | T4B_A  | 4.2E-07 | 2.4E-06 | 1.296E-06 | 5.074E-07 |
| 3622 | G13B_A | Y10B_A | S8B_A  | I20B_T | 7.1E-07 | 1.8E-06 | 1.297E-06 | 3.036E-07 |
| 3623 | Y10B_A | D6B_A  | K17B_S | V24B_Q | 7.9E-07 | 2.9E-06 | 1.298E-06 | 4.901E-07 |
| 3624 | Y10B_A | I20B_Q | K17B_A | E12B_A | 6.4E-07 | 2.3E-06 | 1.298E-06 | 4.850E-07 |
| 3625 | Y10B_A | S8B_A  | L23B_R | V24B_Q | 7.1E-07 | 2.2E-06 | 1.298E-06 | 3.708E-07 |
| 3626 | S8B_A  | G13B_W | F3B_A  | V24B_N | 9.6E-07 | 2.0E-06 | 1.298E-06 | 2.839E-07 |
| 3627 | Y10B_A | I20B_S | S5B_A  | G1B_A  | 7.1E-07 | 2.3E-06 | 1.298E-06 | 4.421E-07 |
| 3628 | Y10B_A | I20B_N | E18B_A | T2B_A  | 9.4E-07 | 2.0E-06 | 1.299E-06 | 3.120E-07 |
| 3629 | Y10B_A | T4B_A  | L23B_Q | V24B_T | 7.2E-07 | 2.4E-06 | 1.299E-06 | 4.460E-07 |
| 3630 | S8B_A  | V7B_A  | I20B_N | T4B_A  | 6.3E-07 | 1.9E-06 | 1.299E-06 | 3.620E-07 |
| 3631 | Y10B_A | I20B_N | G1B_R  | Q14B_A | 5.9E-07 | 2.3E-06 | 1.300E-06 | 4.283E-07 |
| 3632 | G13B_A | S8B_A  | S9B_A  | V24B_N | 8.4E-07 | 2.0E-06 | 1.301E-06 | 3.008E-07 |
| 3633 | G13B_A | S5B_A  | V24B_Q | E12B_A | 5.8E-07 | 2.3E-06 | 1.301E-06 | 4.261E-07 |
| 3634 | G13B_A | Y10B_A | F19B_Q | K17B_S | 7.1E-07 | 2.4E-06 | 1.301E-06 | 4.918E-07 |
| 3635 | Y10B_A | F19B_W | K17B_S | E12B_A | 7.3E-07 | 1.9E-06 | 1.301E-06 | 3.306E-07 |
| 3636 | S8B_A  | G13B_W | E18B_A | V24B_Q | 6.9E-07 | 2.5E-06 | 1.301E-06 | 5.149E-07 |
| 3637 | Y10B_A | F3B_A  | E18B_T | V24B_Q | 8.4E-07 | 1.9E-06 | 1.302E-06 | 3.181E-07 |
| 3638 | Y10B_A | G13B_W | F3B_A  | V24B_Q | 7.3E-07 | 2.2E-06 | 1.302E-06 | 4.321E-07 |
| 3639 | Y10B_A | L23B_R | V24B_Q | Q14B_A | 6.0E-07 | 2.1E-06 | 1.302E-06 | 3.588E-07 |

|      |        |        |        |        |         |         |           |           |
|------|--------|--------|--------|--------|---------|---------|-----------|-----------|
| 3640 | Y10B_A | V7B_A  | S9B_A  | V24B_T | 7.5E-07 | 2.5E-06 | 1.303E-06 | 4.210E-07 |
| 3641 | Y10B_A | I20B_S | T4B_A  | F19B_A | 6.2E-07 | 2.2E-06 | 1.303E-06 | 3.755E-07 |
| 3642 | G13B_A | V7B_A  | S9B_A  | K17B_S | 8.0E-07 | 1.9E-06 | 1.303E-06 | 3.357E-07 |
| 3643 | Y10B_A | S8B_A  | F3B_A  | I20B_Q | 4.9E-07 | 2.4E-06 | 1.304E-06 | 5.332E-07 |
| 3644 | G13B_A | F3B_A  | K17B_S | E12B_A | 6.2E-07 | 2.2E-06 | 1.304E-06 | 3.783E-07 |
| 3645 | Y10B_A | L11B_A | I20B_S | T4B_A  | 8.7E-07 | 1.9E-06 | 1.304E-06 | 3.476E-07 |
| 3646 | Y10B_A | V7B_A  | I20B_Q | T2B_A  | 6.8E-07 | 2.2E-06 | 1.304E-06 | 4.396E-07 |
| 3647 | S8B_A  | G13B_W | V7B_A  | V24B_Q | 7.3E-07 | 2.8E-06 | 1.305E-06 | 4.269E-07 |
| 3648 | S8B_A  | G13B_W | G1B_R  | V24B_T | 8.3E-07 | 2.2E-06 | 1.305E-06 | 3.314E-07 |
| 3649 | Y10B_A | G13B_W | V24B_T | G1B_A  | 1.0E-06 | 2.0E-06 | 1.305E-06 | 2.625E-07 |
| 3650 | Y10B_A | G13B_W | F19B_A | V24B_T | 9.1E-07 | 1.9E-06 | 1.306E-06 | 2.792E-07 |
| 3651 | G13B_A | F19B_Q | L23B_R | T2B_A  | 6.8E-07 | 2.0E-06 | 1.306E-06 | 3.974E-07 |
| 3652 | Y10B_A | E18B_T | K17B_S | E12B_A | 6.0E-07 | 2.5E-06 | 1.307E-06 | 4.465E-07 |
| 3653 | Y10B_A | S8B_A  | I20B_N | G1B_R  | 6.6E-07 | 2.0E-06 | 1.307E-06 | 3.270E-07 |
| 3654 | G13B_A | Y10B_A | K17B_S | V24B_N | 7.1E-07 | 2.3E-06 | 1.307E-06 | 4.479E-07 |
| 3655 | Y10B_A | G13B_W | A16B_N | V24B_T | 3.7E-07 | 2.1E-06 | 1.307E-06 | 4.638E-07 |
| 3656 | Y10B_A | S8B_A  | L23B_Q | V24B_T | 3.8E-07 | 2.4E-06 | 1.307E-06 | 4.851E-07 |
| 3657 | G13B_A | Y10B_A | L23B_Q | K17B_S | 3.5E-07 | 2.1E-06 | 1.307E-06 | 4.293E-07 |
| 3658 | G13B_A | I20B_T | G1B_R  | K17B_A | 6.7E-07 | 2.0E-06 | 1.308E-06 | 3.372E-07 |
| 3659 | Y10B_A | S8B_A  | L23B_Q | V24B_N | 5.5E-07 | 3.0E-06 | 1.308E-06 | 6.138E-07 |
| 3660 | S8B_A  | D6B_A  | F19B_Q | V24B_Q | 7.1E-07 | 2.0E-06 | 1.308E-06 | 3.791E-07 |
| 3661 | S8B_A  | D6B_A  | I20B_N | F19B_A | 5.0E-07 | 2.0E-06 | 1.308E-06 | 3.999E-07 |
| 3662 | G13B_A | Y10B_A | S9B_A  | V24B_N | 6.3E-07 | 2.4E-06 | 1.308E-06 | 4.511E-07 |
| 3663 | Y10B_A | V7B_A  | F19B_W | L23B_Q | 5.4E-07 | 3.1E-06 | 1.308E-06 | 6.080E-07 |
| 3664 | Y10B_A | I20B_S | G1B_R  | T4B_A  | 8.6E-07 | 2.0E-06 | 1.309E-06 | 3.020E-07 |
| 3665 | G13B_A | A16B_N | E18B_T | F19B_Q | 2.6E-07 | 2.5E-06 | 1.309E-06 | 7.185E-07 |
| 3666 | Y10B_A | I20B_S | K17B_A | E12B_A | 7.8E-07 | 1.8E-06 | 1.310E-06 | 2.558E-07 |
| 3667 | G13B_A | A16B_N | L23B_Q | E12B_A | 4.5E-07 | 2.6E-06 | 1.310E-06 | 5.386E-07 |
| 3668 | G13B_A | F19B_W | V24B_T | Q14B_A | 7.3E-07 | 1.9E-06 | 1.310E-06 | 3.398E-07 |
| 3669 | Y10B_A | F3B_A  | S9B_A  | V24B_T | 7.8E-07 | 2.0E-06 | 1.310E-06 | 3.287E-07 |
| 3670 | G13B_A | F3B_A  | F19B_W | L23B_R | 6.8E-07 | 2.3E-06 | 1.310E-06 | 4.231E-07 |
| 3671 | G13B_A | E18B_T | G1B_R  | F19B_W | 5.3E-07 | 2.0E-06 | 1.310E-06 | 3.263E-07 |
| 3672 | Y10B_A | E18B_A | K17B_S | V24B_N | 9.0E-07 | 1.8E-06 | 1.310E-06 | 2.614E-07 |
| 3673 | Y10B_A | F3B_A  | F19B_Q | K17B_S | 6.7E-07 | 2.3E-06 | 1.310E-06 | 4.929E-07 |
| 3674 | G13B_A | I20B_Q | T4B_A  | T2B_A  | 5.8E-07 | 3.0E-06 | 1.310E-06 | 5.849E-07 |
| 3675 | Y10B_A | V7B_A  | I20B_T | T4B_A  | 4.8E-07 | 1.9E-06 | 1.310E-06 | 3.764E-07 |
| 3676 | Y10B_A | E18B_A | S9B_A  | V24B_N | 6.1E-07 | 2.0E-06 | 1.311E-06 | 4.064E-07 |
| 3677 | Y10B_A | A16B_N | I20B_Q | Q14B_A | 5.2E-07 | 2.4E-06 | 1.312E-06 | 5.323E-07 |
| 3678 | Y10B_A | D6B_A  | I20B_T | E18B_A | 7.3E-07 | 2.2E-06 | 1.312E-06 | 3.872E-07 |
| 3679 | Y10B_A | F3B_A  | S9B_A  | V24B_Q | 7.8E-07 | 2.1E-06 | 1.312E-06 | 4.409E-07 |
| 3680 | Y10B_A | G13B_W | G1B_R  | L23B_Q | 7.2E-07 | 2.2E-06 | 1.313E-06 | 3.650E-07 |
| 3681 | G13B_A | S8B_A  | I20B_S | T2B_A  | 7.1E-07 | 2.0E-06 | 1.313E-06 | 3.260E-07 |
| 3682 | Y10B_A | D6B_A  | E18B_T | V24B_T | 7.3E-07 | 2.3E-06 | 1.313E-06 | 3.384E-07 |
| 3683 | G13B_A | S8B_A  | S9B_A  | L23B_R | 7.9E-07 | 2.1E-06 | 1.313E-06 | 3.347E-07 |
| 3684 | Y10B_A | I20B_T | G1B_R  | Q14B_A | 7.7E-07 | 2.0E-06 | 1.313E-06 | 3.528E-07 |
| 3685 | G13B_A | S5B_A  | S9B_A  | L23B_Q | 8.0E-07 | 2.1E-06 | 1.313E-06 | 3.136E-07 |
| 3686 | G13B_A | F19B_Q | K17B_S | Q14B_A | 2.1E-07 | 2.7E-06 | 1.313E-06 | 5.424E-07 |
| 3687 | Y10B_A | A16B_N | F19B_Q | L23B_Q | 7.2E-07 | 2.5E-06 | 1.313E-06 | 4.780E-07 |
| 3688 | Y10B_A | D6B_A  | G13B_W | V24B_Q | 6.6E-07 | 2.1E-06 | 1.314E-06 | 4.164E-07 |
| 3689 | G13B_A | L11B_A | F19B_W | L23B_R | 6.2E-07 | 2.0E-06 | 1.314E-06 | 3.675E-07 |
| 3690 | Y10B_A | L23B_Q | T2B_A  | V24B_N | 6.5E-07 | 2.6E-06 | 1.315E-06 | 4.292E-07 |
| 3691 | G13B_A | F3B_A  | L11B_A | V24B_N | 7.3E-07 | 2.4E-06 | 1.316E-06 | 3.688E-07 |



|      |        |        |        |        |         |         |           |           |
|------|--------|--------|--------|--------|---------|---------|-----------|-----------|
| 3692 | Y10B_A | F3B_A  | I20B_N | S5B_A  | 8.3E-07 | 2.2E-06 | 1.316E-06 | 3.621E-07 |
| 3693 | S8B_A  | V7B_A  | I20B_N | S5B_A  | 9.8E-07 | 2.2E-06 | 1.316E-06 | 3.298E-07 |
| 3694 | S8B_A  | D6B_A  | K17B_S | V24B_N | 7.3E-07 | 2.0E-06 | 1.317E-06 | 4.060E-07 |
| 3695 | G13B_A | E18B_A | S9B_A  | K17B_S | 7.6E-07 | 2.0E-06 | 1.318E-06 | 3.430E-07 |
| 3696 | G13B_A | Y10B_A | I20B_T | Q14B_A | 8.3E-07 | 1.9E-06 | 1.319E-06 | 3.177E-07 |
| 3697 | Y10B_A | S5B_A  | L23B_R | V24B_Q | 5.7E-07 | 1.9E-06 | 1.319E-06 | 3.247E-07 |
| 3698 | Y10B_A | S8B_A  | F3B_A  | I20B_T | 5.4E-07 | 2.3E-06 | 1.320E-06 | 3.894E-07 |
| 3699 | Y10B_A | F19B_Q | V24B_T | T2B_A  | 6.8E-07 | 2.4E-06 | 1.320E-06 | 4.280E-07 |
| 3700 | Y10B_A | D6B_A  | L23B_R | K17B_S | 6.9E-07 | 2.3E-06 | 1.321E-06 | 4.510E-07 |
| 3701 | Y10B_A | L11B_A | F19B_Q | L23B_R | 4.9E-07 | 1.9E-06 | 1.321E-06 | 4.189E-07 |
| 3702 | Y10B_A | D6B_A  | K17B_S | V24B_T | 7.6E-07 | 2.2E-06 | 1.321E-06 | 4.167E-07 |
| 3703 | G13B_A | E18B_T | G1B_R  | E12B_A | 7.5E-07 | 1.9E-06 | 1.322E-06 | 3.321E-07 |
| 3704 | G13B_A | S8B_A  | I20B_N | Q14B_A | 8.3E-07 | 2.2E-06 | 1.322E-06 | 3.906E-07 |
| 3705 | G13B_A | E18B_T | S9B_A  | F19B_A | 6.7E-07 | 2.1E-06 | 1.323E-06 | 4.102E-07 |
| 3706 | S8B_A  | G13B_W | L23B_Q | F19B_A | 5.9E-07 | 2.0E-06 | 1.323E-06 | 4.194E-07 |
| 3707 | Y10B_A | D6B_A  | S9B_A  | V24B_Q | 6.1E-07 | 2.0E-06 | 1.324E-06 | 3.461E-07 |
| 3708 | S8B_A  | G13B_W | E18B_A | V24B_N | 8.8E-07 | 2.1E-06 | 1.324E-06 | 2.952E-07 |
| 3709 | Y10B_A | S8B_A  | I20B_T | L11B_A | 8.3E-07 | 2.2E-06 | 1.324E-06 | 4.249E-07 |
| 3710 | Y10B_A | G13B_W | A16B_N | L23B_R | 2.9E-07 | 2.7E-06 | 1.325E-06 | 6.232E-07 |
| 3711 | G13B_A | A16B_N | I20B_Q | T4B_A  | 3.4E-07 | 2.7E-06 | 1.325E-06 | 5.979E-07 |
| 3712 | Y10B_A | I20B_T | G1B_R  | T4B_A  | 5.6E-07 | 2.0E-06 | 1.326E-06 | 3.705E-07 |
| 3713 | Y10B_A | A16B_N | E18B_T | V24B_T | 3.6E-07 | 2.7E-06 | 1.326E-06 | 6.551E-07 |
| 3714 | G13B_A | F3B_A  | L23B_R | E12B_A | 6.8E-07 | 3.0E-06 | 1.327E-06 | 5.124E-07 |
| 3715 | Y10B_A | G13B_W | F19B_W | L23B_R | 5.9E-07 | 2.3E-06 | 1.327E-06 | 4.554E-07 |
| 3716 | Y10B_A | I20B_Q | E18B_A | T2B_A  | 6.2E-07 | 2.3E-06 | 1.327E-06 | 4.792E-07 |
| 3717 | Y10B_A | G1B_R  | S9B_A  | V24B_T | 7.3E-07 | 1.9E-06 | 1.327E-06 | 3.381E-07 |
| 3718 | G13B_A | S8B_A  | I20B_Q | T2B_A  | 7.1E-07 | 2.2E-06 | 1.327E-06 | 4.081E-07 |
| 3719 | Y10B_A | E18B_T | F19B_A | V24B_Q | 6.7E-07 | 2.8E-06 | 1.327E-06 | 4.744E-07 |
| 3720 | Y10B_A | I20B_Q | E18B_A | S5B_A  | 5.3E-07 | 3.2E-06 | 1.327E-06 | 6.348E-07 |
| 3721 | Y10B_A | F3B_A  | I20B_S | T2B_A  | 7.4E-07 | 2.0E-06 | 1.327E-06 | 3.672E-07 |
| 3722 | S8B_A  | G13B_W | F3B_A  | V24B_T | 8.5E-07 | 1.9E-06 | 1.327E-06 | 2.962E-07 |
| 3723 | G13B_A | S9B_A  | K17B_S | F19B_A | 7.4E-07 | 2.3E-06 | 1.328E-06 | 4.856E-07 |
| 3724 | G13B_A | S9B_A  | K17B_S | G1B_A  | 8.3E-07 | 1.9E-06 | 1.328E-06 | 2.630E-07 |
| 3725 | Y10B_A | A16B_N | I20B_N | S5B_A  | 2.4E-07 | 2.2E-06 | 1.328E-06 | 6.614E-07 |
| 3726 | G13B_A | E18B_T | S5B_A  | L23B_Q | 6.8E-07 | 2.3E-06 | 1.328E-06 | 4.361E-07 |
| 3727 | Y10B_A | G13B_W | F19B_W | K17B_S | 5.9E-07 | 2.9E-06 | 1.329E-06 | 5.556E-07 |
| 3728 | Y10B_A | D6B_A  | S9B_A  | V24B_N | 6.8E-07 | 2.1E-06 | 1.329E-06 | 3.748E-07 |
| 3729 | Y10B_A | S5B_A  | F19B_Q | V24B_N | 4.2E-07 | 2.8E-06 | 1.329E-06 | 5.831E-07 |
| 3730 | Y10B_A | L23B_Q | K17B_S | G1B_A  | 6.7E-07 | 1.9E-06 | 1.330E-06 | 3.751E-07 |
| 3731 | G13B_A | A16B_N | G1B_R  | V24B_Q | 3.3E-07 | 2.0E-06 | 1.330E-06 | 5.606E-07 |
| 3732 | G13B_A | V7B_A  | E18B_T | S9B_A  | 9.2E-07 | 2.5E-06 | 1.331E-06 | 4.221E-07 |
| 3733 | G13B_A | I20B_N | T4B_A  | Q14B_A | 6.2E-07 | 2.2E-06 | 1.331E-06 | 4.167E-07 |
| 3734 | G13B_A | I20B_T | T4B_A  | T2B_A  | 8.3E-07 | 1.9E-06 | 1.331E-06 | 3.118E-07 |
| 3735 | Y10B_A | G13B_W | F19B_W | E12B_A | 7.9E-07 | 2.3E-06 | 1.332E-06 | 4.612E-07 |
| 3736 | G13B_A | S5B_A  | F19B_W | V24B_Q | 9.4E-07 | 2.0E-06 | 1.332E-06 | 2.723E-07 |
| 3737 | G13B_A | A16B_N | F19B_Q | E12B_A | 2.9E-07 | 2.2E-06 | 1.332E-06 | 4.608E-07 |
| 3738 | G13B_A | F3B_A  | G1B_R  | V24B_Q | 6.4E-07 | 2.1E-06 | 1.333E-06 | 3.078E-07 |
| 3739 | S8B_A  | G13B_W | V7B_A  | L23B_Q | 7.7E-07 | 2.4E-06 | 1.333E-06 | 4.609E-07 |
| 3740 | G13B_A | S8B_A  | F19B_Q | L23B_R | 7.0E-07 | 2.4E-06 | 1.333E-06 | 4.767E-07 |
| 3741 | Y10B_A | E18B_T | L11B_A | V24B_T | 8.1E-07 | 2.4E-06 | 1.333E-06 | 4.395E-07 |
| 3742 | Y10B_A | G1B_R  | S9B_A  | V24B_N | 7.8E-07 | 2.6E-06 | 1.334E-06 | 3.775E-07 |
| 3743 | Y10B_A | I20B_N | T2B_A  | G1B_A  | 9.7E-07 | 1.9E-06 | 1.334E-06 | 3.065E-07 |

|      |        |        |        |        |         |         |           |           |
|------|--------|--------|--------|--------|---------|---------|-----------|-----------|
| 3744 | Y10B_A | L11B_A | L23B_R | K17B_S | 7.3E-07 | 2.1E-06 | 1.335E-06 | 4.052E-07 |
| 3745 | Y10B_A | F3B_A  | L23B_Q | K17B_S | 6.0E-07 | 2.0E-06 | 1.335E-06 | 3.915E-07 |
| 3746 | G13B_A | F19B_W | T4B_A  | V24B_N | 5.3E-07 | 2.4E-06 | 1.335E-06 | 4.225E-07 |
| 3747 | G13B_A | S8B_A  | L23B_R | K17B_S | 7.5E-07 | 3.1E-06 | 1.335E-06 | 6.157E-07 |
| 3748 | G13B_A | I20B_S | S5B_A  | T2B_A  | 8.3E-07 | 2.0E-06 | 1.335E-06 | 3.028E-07 |
| 3749 | Y10B_A | F3B_A  | I20B_N | Q14B_A | 7.1E-07 | 2.2E-06 | 1.336E-06 | 4.565E-07 |
| 3750 | G13B_A | S8B_A  | I20B_T | S5B_A  | 8.2E-07 | 2.2E-06 | 1.336E-06 | 4.046E-07 |
| 3751 | Y10B_A | T4B_A  | K17B_S | V24B_Q | 8.3E-07 | 1.9E-06 | 1.336E-06 | 3.124E-07 |
| 3752 | S8B_A  | G13B_W | L23B_R | G1B_A  | 7.7E-07 | 2.2E-06 | 1.336E-06 | 3.754E-07 |
| 3753 | Y10B_A | G13B_W | F3B_A  | V24B_T | 9.0E-07 | 1.8E-06 | 1.337E-06 | 2.628E-07 |
| 3754 | Y10B_A | E18B_A | F19B_Q | S9B_A  | 6.8E-07 | 2.2E-06 | 1.337E-06 | 4.483E-07 |
| 3755 | S8B_A  | G13B_W | A16B_N | L23B_Q | 5.4E-07 | 2.7E-06 | 1.337E-06 | 5.054E-07 |
| 3756 | Y10B_A | I20B_S | G1B_R  | Q14B_A | 8.0E-07 | 2.5E-06 | 1.337E-06 | 4.357E-07 |
| 3757 | Y10B_A | G13B_W | F3B_A  | F19B_Q | 7.1E-07 | 2.0E-06 | 1.337E-06 | 4.526E-07 |
| 3758 | Y10B_A | E18B_T | F19B_W | S9B_A  | 4.1E-07 | 2.2E-06 | 1.337E-06 | 4.641E-07 |
| 3759 | Y10B_A | K17B_S | V24B_T | G1B_A  | 7.1E-07 | 2.0E-06 | 1.337E-06 | 3.262E-07 |
| 3760 | G13B_A | S9B_A  | L23B_Q | T2B_A  | 5.6E-07 | 2.3E-06 | 1.337E-06 | 4.226E-07 |
| 3761 | Y10B_A | F3B_A  | E12B_A | V24B_N | 7.2E-07 | 2.1E-06 | 1.338E-06 | 4.414E-07 |
| 3762 | Y10B_A | V7B_A  | L23B_R | K17B_S | 8.7E-07 | 2.0E-06 | 1.338E-06 | 3.057E-07 |
| 3763 | Y10B_A | A16B_N | E12B_A | V24B_N | 4.3E-07 | 2.4E-06 | 1.338E-06 | 5.391E-07 |
| 3764 | G13B_A | E18B_T | T4B_A  | V24B_N | 4.4E-07 | 2.1E-06 | 1.339E-06 | 4.780E-07 |
| 3765 | S8B_A  | G13B_W | V24B_T | G1B_A  | 7.2E-07 | 2.1E-06 | 1.339E-06 | 3.324E-07 |
| 3766 | G13B_A | A16B_N | E18B_T | F19B_W | 3.3E-07 | 2.9E-06 | 1.339E-06 | 6.214E-07 |
| 3767 | Y10B_A | G13B_W | E18B_T | F19B_W | 6.2E-07 | 2.5E-06 | 1.339E-06 | 4.170E-07 |
| 3768 | Y10B_A | I20B_T | S5B_A  | G1B_A  | 7.1E-07 | 2.1E-06 | 1.340E-06 | 3.863E-07 |
| 3769 | Y10B_A | V7B_A  | I20B_N | T4B_A  | 7.1E-07 | 2.4E-06 | 1.340E-06 | 4.269E-07 |
| 3770 | G13B_A | S5B_A  | V24B_T | E12B_A | 8.1E-07 | 1.7E-06 | 1.340E-06 | 2.411E-07 |
| 3771 | Y10B_A | A16B_N | I20B_N | T2B_A  | 2.9E-07 | 2.7E-06 | 1.340E-06 | 8.128E-07 |
| 3772 | G13B_A | S8B_A  | S9B_A  | L23B_Q | 8.0E-07 | 1.9E-06 | 1.342E-06 | 3.021E-07 |
| 3773 | Y10B_A | D6B_A  | A16B_N | I20B_N | 1.7E-07 | 2.7E-06 | 1.342E-06 | 7.742E-07 |
| 3774 | G13B_A | F19B_W | V24B_T | G1B_A  | 6.2E-07 | 2.2E-06 | 1.342E-06 | 3.996E-07 |
| 3775 | S8B_A  | D6B_A  | E18B_T | L23B_Q | 4.3E-07 | 2.4E-06 | 1.343E-06 | 4.846E-07 |
| 3776 | G13B_A | L23B_R | F19B_A | E12B_A | 8.4E-07 | 1.9E-06 | 1.344E-06 | 3.115E-07 |
| 3777 | G13B_A | S8B_A  | F19B_W | V24B_T | 7.3E-07 | 2.0E-06 | 1.344E-06 | 3.886E-07 |
| 3778 | Y10B_A | G13B_W | V24B_N | G1B_A  | 7.3E-07 | 1.9E-06 | 1.344E-06 | 3.698E-07 |
| 3779 | G13B_A | V7B_A  | F19B_A | V24B_Q | 6.2E-07 | 1.9E-06 | 1.344E-06 | 3.113E-07 |
| 3780 | Y10B_A | G1B_R  | S9B_A  | L23B_R | 8.1E-07 | 3.3E-06 | 1.344E-06 | 5.379E-07 |
| 3781 | Y10B_A | F3B_A  | E18B_T | V24B_N | 4.6E-07 | 2.5E-06 | 1.344E-06 | 4.897E-07 |
| 3782 | Y10B_A | L11B_A | I20B_Q | T4B_A  | 8.3E-07 | 2.2E-06 | 1.344E-06 | 3.917E-07 |
| 3783 | Y10B_A | L23B_R | V24B_T | T2B_A  | 6.7E-07 | 2.4E-06 | 1.344E-06 | 4.665E-07 |
| 3784 | Y10B_A | S8B_A  | A16B_N | I20B_N | 4.9E-07 | 2.5E-06 | 1.344E-06 | 4.775E-07 |
| 3785 | Y10B_A | I20B_Q | E18B_A | Q14B_A | 8.5E-07 | 2.3E-06 | 1.344E-06 | 4.047E-07 |
| 3786 | G13B_A | I20B_T | S5B_A  | T4B_A  | 7.0E-07 | 2.2E-06 | 1.345E-06 | 3.636E-07 |
| 3787 | Y10B_A | L11B_A | I20B_S | S5B_A  | 5.8E-07 | 2.2E-06 | 1.345E-06 | 3.758E-07 |
| 3788 | Y10B_A | S5B_A  | L23B_Q | V24B_T | 6.8E-07 | 3.0E-06 | 1.345E-06 | 5.048E-07 |
| 3789 | Y10B_A | D6B_A  | I20B_S | S5B_A  | 7.6E-07 | 1.8E-06 | 1.345E-06 | 2.794E-07 |
| 3790 | Y10B_A | I20B_S | G1B_R  | S5B_A  | 5.6E-07 | 2.4E-06 | 1.345E-06 | 4.295E-07 |
| 3791 | G13B_A | F3B_A  | F19B_Q | E12B_A | 5.8E-07 | 2.6E-06 | 1.345E-06 | 4.860E-07 |
| 3792 | Y10B_A | V7B_A  | F19B_Q | L23B_R | 7.1E-07 | 2.3E-06 | 1.346E-06 | 4.018E-07 |
| 3793 | G13B_A | F19B_Q | L23B_Q | Q14B_A | 3.6E-07 | 2.5E-06 | 1.347E-06 | 5.856E-07 |
| 3794 | G13B_A | I20B_S | K17B_A | G1B_A  | 8.3E-07 | 1.9E-06 | 1.348E-06 | 3.213E-07 |
| 3795 | Y10B_A | G13B_W | E18B_A | V24B_Q | 7.8E-07 | 1.8E-06 | 1.348E-06 | 2.820E-07 |

|      |        |        |        |        |         |         |           |           |
|------|--------|--------|--------|--------|---------|---------|-----------|-----------|
| 3796 | G13B_A | A16B_N | F19B_W | L23B_R | 1.8E-07 | 2.5E-06 | 1.348E-06 | 6.445E-07 |
| 3797 | Y10B_A | F3B_A  | I20B_T | S5B_A  | 8.3E-07 | 1.8E-06 | 1.349E-06 | 2.590E-07 |
| 3798 | G13B_A | F3B_A  | F19B_W | K17B_S | 8.1E-07 | 1.9E-06 | 1.349E-06 | 3.897E-07 |
| 3799 | Y10B_A | E18B_T | V24B_T | G1B_A  | 7.5E-07 | 3.1E-06 | 1.349E-06 | 5.725E-07 |
| 3800 | Y10B_A | G13B_W | V7B_A  | L23B_R | 6.6E-07 | 2.2E-06 | 1.351E-06 | 4.377E-07 |
| 3801 | G13B_A | Y10B_A | S8B_A  | I20B_Q | 4.9E-07 | 2.3E-06 | 1.351E-06 | 5.189E-07 |
| 3802 | G13B_A | Y10B_A | F19B_W | V24B_N | 5.0E-07 | 2.3E-06 | 1.352E-06 | 4.467E-07 |
| 3803 | Y10B_A | S9B_A  | L23B_Q | F19B_A | 5.8E-07 | 2.4E-06 | 1.352E-06 | 4.812E-07 |
| 3804 | G13B_A | F3B_A  | G1B_R  | V24B_N | 7.9E-07 | 2.3E-06 | 1.353E-06 | 4.416E-07 |
| 3805 | Y10B_A | T4B_A  | K17B_S | V24B_N | 5.5E-07 | 2.1E-06 | 1.353E-06 | 3.847E-07 |
| 3806 | G13B_A | Y10B_A | S8B_A  | I20B_N | 8.3E-07 | 2.2E-06 | 1.353E-06 | 3.662E-07 |
| 3807 | G13B_A | K17B_A | F19B_Q | V24B_Q | 5.3E-07 | 2.5E-06 | 1.354E-06 | 5.005E-07 |
| 3808 | G13B_A | A16B_N | F19B_W | V24B_T | 2.7E-07 | 2.3E-06 | 1.354E-06 | 5.916E-07 |
| 3809 | G13B_A | I20B_S | Q14B_A | T2B_A  | 7.1E-07 | 2.2E-06 | 1.354E-06 | 4.272E-07 |
| 3810 | G13B_A | E18B_A | V24B_T | E12B_A | 8.0E-07 | 2.2E-06 | 1.355E-06 | 3.017E-07 |
| 3811 | Y10B_A | S9B_A  | F19B_A | V24B_T | 6.8E-07 | 2.7E-06 | 1.355E-06 | 5.180E-07 |
| 3812 | Y10B_A | L11B_A | I20B_Q | Q14B_A | 5.8E-07 | 2.3E-06 | 1.355E-06 | 4.712E-07 |
| 3813 | G13B_A | Y10B_A | I20B_S | Q14B_A | 8.3E-07 | 2.0E-06 | 1.357E-06 | 3.402E-07 |
| 3814 | G13B_A | I20B_T | S5B_A  | T2B_A  | 8.3E-07 | 1.8E-06 | 1.357E-06 | 3.085E-07 |
| 3815 | G13B_A | T4B_A  | F19B_Q | S9B_A  | 4.4E-07 | 2.6E-06 | 1.357E-06 | 4.953E-07 |
| 3816 | G13B_A | T4B_A  | F19B_Q | L23B_R | 5.7E-07 | 2.0E-06 | 1.358E-06 | 4.127E-07 |
| 3817 | G13B_A | S8B_A  | I20B_Q | Q14B_A | 5.8E-07 | 2.2E-06 | 1.358E-06 | 4.407E-07 |
| 3818 | S8B_A  | G13B_W | L11B_A | V24B_T | 9.6E-07 | 1.9E-06 | 1.358E-06 | 2.936E-07 |
| 3819 | Y10B_A | F3B_A  | I20B_T | Q14B_A | 7.1E-07 | 2.2E-06 | 1.358E-06 | 4.074E-07 |
| 3820 | Y10B_A | G13B_W | V7B_A  | V24B_T | 8.6E-07 | 2.0E-06 | 1.359E-06 | 2.865E-07 |
| 3821 | G13B_A | I20B_N | S5B_A  | T4B_A  | 8.3E-07 | 1.9E-06 | 1.360E-06 | 2.875E-07 |
| 3822 | Y10B_A | F19B_Q | V24B_Q | T2B_A  | 3.9E-07 | 2.4E-06 | 1.360E-06 | 6.122E-07 |
| 3823 | G13B_A | Y10B_A | E12B_A | V24B_N | 7.9E-07 | 2.6E-06 | 1.360E-06 | 4.323E-07 |
| 3824 | G13B_A | L23B_Q | K17B_S | T2B_A  | 4.5E-07 | 2.2E-06 | 1.360E-06 | 5.628E-07 |
| 3825 | Y10B_A | K17B_S | V24B_Q | T2B_A  | 7.6E-07 | 3.0E-06 | 1.361E-06 | 5.080E-07 |
| 3826 | G13B_A | V7B_A  | V24B_N | G1B_A  | 9.1E-07 | 2.3E-06 | 1.361E-06 | 3.494E-07 |
| 3827 | G13B_A | F3B_A  | I20B_S | K17B_A | 7.1E-07 | 2.2E-06 | 1.361E-06 | 3.802E-07 |
| 3828 | Y10B_A | I20B_N | T4B_A  | G1B_A  | 8.4E-07 | 1.9E-06 | 1.361E-06 | 3.635E-07 |
| 3829 | G13B_A | S8B_A  | I20B_N | T2B_A  | 8.2E-07 | 2.2E-06 | 1.361E-06 | 3.664E-07 |
| 3830 | Y10B_A | I20B_S | F19B_A | T2B_A  | 6.8E-07 | 2.4E-06 | 1.362E-06 | 5.138E-07 |
| 3831 | G13B_A | Y10B_A | I20B_T | T2B_A  | 9.8E-07 | 1.9E-06 | 1.362E-06 | 2.782E-07 |
| 3832 | Y10B_A | D6B_A  | G13B_W | V24B_N | 7.8E-07 | 2.3E-06 | 1.362E-06 | 3.492E-07 |
| 3833 | Y10B_A | A16B_N | I20B_S | Q14B_A | 4.0E-07 | 2.7E-06 | 1.362E-06 | 6.111E-07 |
| 3834 | Y10B_A | G13B_W | F3B_A  | L23B_Q | 7.1E-07 | 2.6E-06 | 1.362E-06 | 4.705E-07 |
| 3835 | G13B_A | V7B_A  | G1B_R  | V24B_Q | 7.9E-07 | 2.3E-06 | 1.363E-06 | 3.685E-07 |
| 3836 | G13B_A | G1B_R  | F19B_W | E12B_A | 6.2E-07 | 1.8E-06 | 1.363E-06 | 3.182E-07 |
| 3837 | Y10B_A | S8B_A  | I20B_N | G1B_A  | 8.3E-07 | 2.2E-06 | 1.364E-06 | 4.681E-07 |
| 3838 | G13B_A | A16B_N | G1B_R  | V24B_T | 3.3E-07 | 2.1E-06 | 1.364E-06 | 5.618E-07 |
| 3839 | G13B_A | V7B_A  | I20B_T | K17B_A | 8.3E-07 | 3.2E-06 | 1.364E-06 | 5.190E-07 |
| 3840 | G13B_A | S8B_A  | E18B_T | V24B_T | 6.6E-07 | 2.6E-06 | 1.364E-06 | 5.032E-07 |
| 3841 | G13B_A | L11B_A | L23B_R | E12B_A | 6.5E-07 | 2.2E-06 | 1.365E-06 | 3.612E-07 |
| 3842 | S8B_A  | G13B_W | A16B_N | L23B_R | 3.8E-07 | 2.4E-06 | 1.365E-06 | 5.568E-07 |
| 3843 | G13B_A | S9B_A  | Q14B_A | V24B_N | 6.3E-07 | 2.1E-06 | 1.365E-06 | 4.485E-07 |
| 3844 | S8B_A  | G13B_W | F19B_A | V24B_Q | 7.0E-07 | 2.4E-06 | 1.365E-06 | 4.737E-07 |
| 3845 | Y10B_A | S9B_A  | V24B_Q | G1B_A  | 7.5E-07 | 1.7E-06 | 1.365E-06 | 2.505E-07 |
| 3846 | Y10B_A | V7B_A  | I20B_T | T2B_A  | 9.7E-07 | 1.9E-06 | 1.365E-06 | 3.076E-07 |
| 3847 | Y10B_A | L11B_A | V24B_Q | E12B_A | 9.4E-07 | 1.8E-06 | 1.366E-06 | 2.510E-07 |

|      |        |        |        |        |         |         |           |           |
|------|--------|--------|--------|--------|---------|---------|-----------|-----------|
| 3848 | Y10B_A | I20B_T | K17B_A | E12B_A | 7.8E-07 | 2.0E-06 | 1.366E-06 | 2.995E-07 |
| 3849 | G13B_A | D6B_A  | F19B_W | L23B_R | 8.1E-07 | 2.4E-06 | 1.366E-06 | 3.997E-07 |
| 3850 | Y10B_A | S8B_A  | V7B_A  | I20B_T | 8.3E-07 | 2.3E-06 | 1.368E-06 | 3.790E-07 |
| 3851 | G13B_A | F19B_W | V24B_Q | Q14B_A | 8.8E-07 | 2.1E-06 | 1.368E-06 | 3.666E-07 |
| 3852 | Y10B_A | E18B_A | S9B_A  | L23B_Q | 8.1E-07 | 2.4E-06 | 1.369E-06 | 4.181E-07 |
| 3853 | Y10B_A | G1B_R  | F19B_W | V24B_Q | 4.7E-07 | 2.4E-06 | 1.369E-06 | 4.775E-07 |
| 3854 | S8B_A  | G13B_W | F19B_Q | G1B_A  | 6.1E-07 | 2.1E-06 | 1.369E-06 | 4.308E-07 |
| 3855 | Y10B_A | A16B_N | F19B_W | V24B_Q | 3.7E-07 | 2.9E-06 | 1.370E-06 | 5.991E-07 |
| 3856 | Y10B_A | E18B_T | G1B_R  | L23B_R | 6.6E-07 | 3.0E-06 | 1.370E-06 | 6.380E-07 |
| 3857 | G13B_A | D6B_A  | G1B_R  | V24B_N | 7.3E-07 | 2.0E-06 | 1.370E-06 | 3.622E-07 |
| 3858 | G13B_A | K17B_S | F19B_A | E12B_A | 9.0E-07 | 1.9E-06 | 1.370E-06 | 2.473E-07 |
| 3859 | Y10B_A | G13B_W | V7B_A  | K17B_S | 9.1E-07 | 1.8E-06 | 1.371E-06 | 2.887E-07 |
| 3860 | S8B_A  | G13B_W | L11B_A | V24B_Q | 5.9E-07 | 2.9E-06 | 1.371E-06 | 5.691E-07 |
| 3861 | Y10B_A | I20B_Q | E18B_A | T4B_A  | 6.2E-07 | 2.1E-06 | 1.371E-06 | 3.798E-07 |
| 3862 | G13B_A | S5B_A  | F19B_Q | V24B_T | 7.4E-07 | 2.8E-06 | 1.371E-06 | 4.925E-07 |
| 3863 | G13B_A | Y10B_A | F19B_W | V24B_Q | 8.2E-07 | 2.0E-06 | 1.371E-06 | 3.266E-07 |
| 3864 | Y10B_A | S5B_A  | L23B_Q | K17B_S | 5.5E-07 | 2.0E-06 | 1.371E-06 | 3.559E-07 |
| 3865 | G13B_A | F19B_W | V24B_T | T2B_A  | 7.0E-07 | 2.5E-06 | 1.371E-06 | 4.697E-07 |
| 3866 | G13B_A | E18B_T | T4B_A  | L23B_R | 7.1E-07 | 1.9E-06 | 1.372E-06 | 3.653E-07 |
| 3867 | Y10B_A | S8B_A  | I20B_N | L11B_A | 8.3E-07 | 3.1E-06 | 1.372E-06 | 5.012E-07 |
| 3868 | Y10B_A | G1B_R  | F19B_Q | L23B_R | 7.2E-07 | 2.1E-06 | 1.372E-06 | 4.534E-07 |
| 3869 | G13B_A | Y10B_A | L23B_R | K17B_S | 5.7E-07 | 2.6E-06 | 1.373E-06 | 4.671E-07 |
| 3870 | G13B_A | D6B_A  | I20B_T | K17B_A | 7.6E-07 | 2.0E-06 | 1.373E-06 | 3.150E-07 |
| 3871 | Y10B_A | G13B_W | S9B_A  | E12B_A | 5.7E-07 | 2.1E-06 | 1.373E-06 | 4.626E-07 |
| 3872 | Y10B_A | I20B_Q | G1B_R  | K17B_A | 7.7E-07 | 2.4E-06 | 1.373E-06 | 4.303E-07 |
| 3873 | Y10B_A | D6B_A  | K17B_S | V24B_N | 7.6E-07 | 2.0E-06 | 1.373E-06 | 3.689E-07 |
| 3874 | G13B_A | I20B_N | S5B_A  | T2B_A  | 5.8E-07 | 2.2E-06 | 1.373E-06 | 4.714E-07 |
| 3875 | Y10B_A | L11B_A | I20B_S | T2B_A  | 7.1E-07 | 2.2E-06 | 1.374E-06 | 4.025E-07 |
| 3876 | Y10B_A | D6B_A  | S9B_A  | L23B_R | 8.0E-07 | 2.6E-06 | 1.374E-06 | 4.132E-07 |
| 3877 | Y10B_A | I20B_T | L11B_A | T2B_A  | 8.3E-07 | 2.2E-06 | 1.375E-06 | 3.943E-07 |
| 3878 | Y10B_A | F19B_W | V24B_N | G1B_A  | 7.0E-07 | 2.0E-06 | 1.376E-06 | 4.039E-07 |
| 3879 | Y10B_A | I20B_S | T4B_A  | G1B_A  | 7.1E-07 | 2.5E-06 | 1.377E-06 | 4.547E-07 |
| 3880 | Y10B_A | S5B_A  | L23B_R | V24B_N | 6.8E-07 | 2.2E-06 | 1.377E-06 | 3.797E-07 |
| 3881 | G13B_A | Y10B_A | I20B_N | T2B_A  | 7.9E-07 | 2.3E-06 | 1.377E-06 | 3.936E-07 |
| 3882 | G13B_A | F3B_A  | I20B_N | K17B_A | 7.1E-07 | 2.2E-06 | 1.378E-06 | 3.961E-07 |
| 3883 | Y10B_A | V7B_A  | I20B_T | Q14B_A | 8.3E-07 | 2.2E-06 | 1.378E-06 | 3.402E-07 |
| 3884 | G13B_A | D6B_A  | E18B_T | F19B_Q | 7.5E-07 | 2.8E-06 | 1.379E-06 | 5.302E-07 |
| 3885 | G13B_A | L11B_A | G1B_R  | V24B_Q | 6.8E-07 | 2.3E-06 | 1.379E-06 | 4.601E-07 |
| 3886 | G13B_A | I20B_S | S5B_A  | Q14B_A | 7.1E-07 | 2.7E-06 | 1.379E-06 | 4.319E-07 |
| 3887 | Y10B_A | I20B_S | F19B_A | Q14B_A | 5.8E-07 | 3.0E-06 | 1.380E-06 | 5.655E-07 |
| 3888 | G13B_A | L11B_A | I20B_S | K17B_A | 7.1E-07 | 1.9E-06 | 1.380E-06 | 2.889E-07 |
| 3889 | G13B_A | F3B_A  | G1B_R  | L23B_Q | 8.5E-07 | 2.4E-06 | 1.380E-06 | 4.501E-07 |
| 3890 | G13B_A | E18B_A | G1B_R  | L23B_Q | 7.8E-07 | 2.1E-06 | 1.380E-06 | 3.996E-07 |
| 3891 | Y10B_A | V7B_A  | I20B_N | Q14B_A | 8.3E-07 | 2.3E-06 | 1.380E-06 | 4.243E-07 |
| 3892 | G13B_A | L11B_A | F19B_W | S9B_A  | 8.5E-07 | 2.5E-06 | 1.380E-06 | 4.159E-07 |
| 3893 | G13B_A | E18B_A | L23B_R | E12B_A | 7.3E-07 | 3.1E-06 | 1.380E-06 | 5.175E-07 |
| 3894 | Y10B_A | L11B_A | I20B_S | Q14B_A | 9.7E-07 | 1.9E-06 | 1.380E-06 | 3.209E-07 |
| 3895 | G13B_A | E18B_T | Q14B_A | V24B_N | 5.4E-07 | 2.1E-06 | 1.381E-06 | 4.530E-07 |
| 3896 | Y10B_A | S5B_A  | F19B_Q | V24B_T | 7.5E-07 | 2.6E-06 | 1.382E-06 | 4.783E-07 |
| 3897 | S8B_A  | D6B_A  | I20B_N | T2B_A  | 8.9E-07 | 2.1E-06 | 1.382E-06 | 3.897E-07 |
| 3898 | S8B_A  | G13B_W | V7B_A  | V24B_N | 8.1E-07 | 2.8E-06 | 1.382E-06 | 4.574E-07 |
| 3899 | G13B_A | E18B_T | S9B_A  | G1B_A  | 9.2E-07 | 3.0E-06 | 1.382E-06 | 4.642E-07 |

|      |        |        |        |        |         |         |           |           |
|------|--------|--------|--------|--------|---------|---------|-----------|-----------|
| 3900 | Y10B_A | F19B_W | V24B_Q | G1B_A  | 7.3E-07 | 2.2E-06 | 1.383E-06 | 4.752E-07 |
| 3901 | G13B_A | Y10B_A | I20B_S | T4B_A  | 6.0E-07 | 2.0E-06 | 1.383E-06 | 3.962E-07 |
| 3902 | G13B_A | E18B_T | V24B_T | T2B_A  | 8.8E-07 | 2.4E-06 | 1.383E-06 | 4.217E-07 |
| 3903 | Y10B_A | S9B_A  | V24B_N | G1B_A  | 7.5E-07 | 2.0E-06 | 1.383E-06 | 3.603E-07 |
| 3904 | G13B_A | S5B_A  | F19B_W | V24B_T | 7.3E-07 | 2.4E-06 | 1.383E-06 | 4.499E-07 |
| 3905 | S8B_A  | G13B_W | F3B_A  | L23B_R | 8.4E-07 | 2.6E-06 | 1.384E-06 | 4.423E-07 |
| 3906 | S8B_A  | G13B_W | E18B_A | L23B_Q | 6.8E-07 | 2.0E-06 | 1.384E-06 | 3.475E-07 |
| 3907 | Y10B_A | E12B_A | V24B_N | G1B_A  | 6.8E-07 | 2.1E-06 | 1.384E-06 | 3.267E-07 |
| 3908 | Y10B_A | D6B_A  | G13B_W | V24B_T | 9.2E-07 | 2.2E-06 | 1.385E-06 | 3.683E-07 |
| 3909 | Y10B_A | V7B_A  | E18B_T | L23B_Q | 4.0E-07 | 2.2E-06 | 1.385E-06 | 4.680E-07 |
| 3910 | Y10B_A | E18B_T | L23B_R | G1B_A  | 8.3E-07 | 2.2E-06 | 1.385E-06 | 3.557E-07 |
| 3911 | Y10B_A | E18B_T | S5B_A  | V24B_Q | 7.2E-07 | 2.2E-06 | 1.386E-06 | 4.084E-07 |
| 3912 | Y10B_A | I20B_N | F19B_A | T2B_A  | 5.5E-07 | 2.8E-06 | 1.386E-06 | 5.472E-07 |
| 3913 | G13B_A | Y10B_A | S9B_A  | L23B_Q | 7.3E-07 | 2.2E-06 | 1.386E-06 | 3.908E-07 |
| 3914 | Y10B_A | A16B_N | I20B_S | S5B_A  | 5.0E-07 | 2.1E-06 | 1.386E-06 | 5.032E-07 |
| 3915 | G13B_A | S5B_A  | S9B_A  | V24B_N | 5.4E-07 | 2.4E-06 | 1.387E-06 | 4.396E-07 |
| 3916 | Y10B_A | F19B_A | V24B_Q | E12B_A | 7.1E-07 | 2.6E-06 | 1.387E-06 | 5.042E-07 |
| 3917 | G13B_A | Y10B_A | I20B_T | S5B_A  | 8.4E-07 | 2.2E-06 | 1.387E-06 | 3.461E-07 |
| 3918 | G13B_A | S5B_A  | L23B_R | E12B_A | 6.4E-07 | 2.7E-06 | 1.387E-06 | 4.427E-07 |
| 3919 | Y10B_A | L23B_R | K17B_S | F19B_A | 5.5E-07 | 2.5E-06 | 1.387E-06 | 4.618E-07 |
| 3920 | Y10B_A | A16B_N | V24B_Q | E12B_A | 3.9E-07 | 2.4E-06 | 1.387E-06 | 5.271E-07 |
| 3921 | G13B_A | D6B_A  | I20B_Q | K17B_A | 6.5E-07 | 2.3E-06 | 1.388E-06 | 3.776E-07 |
| 3922 | G13B_A | E18B_T | T4B_A  | V24B_Q | 7.8E-07 | 2.1E-06 | 1.388E-06 | 3.982E-07 |
| 3923 | Y10B_A | A16B_N | I20B_T | T4B_A  | 4.0E-07 | 2.7E-06 | 1.388E-06 | 5.787E-07 |
| 3924 | Y10B_A | A16B_N | F19B_Q | S9B_A  | 3.0E-07 | 3.7E-06 | 1.388E-06 | 8.486E-07 |
| 3925 | G13B_A | F3B_A  | F19B_A | V24B_N | 9.7E-07 | 2.1E-06 | 1.388E-06 | 2.886E-07 |
| 3926 | Y10B_A | A16B_N | E18B_T | V24B_N | 3.2E-07 | 2.5E-06 | 1.388E-06 | 6.003E-07 |
| 3927 | S8B_A  | G13B_W | L11B_A | V24B_N | 7.3E-07 | 1.9E-06 | 1.389E-06 | 3.355E-07 |
| 3928 | G13B_A | S5B_A  | F19B_Q | L23B_R | 6.0E-07 | 2.0E-06 | 1.389E-06 | 3.955E-07 |
| 3929 | Y10B_A | I20B_T | G1B_R  | S5B_A  | 6.6E-07 | 2.1E-06 | 1.389E-06 | 4.117E-07 |
| 3930 | G13B_A | L11B_A | F19B_W | K17B_S | 6.6E-07 | 2.2E-06 | 1.389E-06 | 4.137E-07 |
| 3931 | Y10B_A | D6B_A  | S9B_A  | V24B_T | 1.1E-06 | 2.1E-06 | 1.390E-06 | 2.751E-07 |
| 3932 | Y10B_A | F19B_Q | L23B_R | G1B_A  | 7.7E-07 | 2.3E-06 | 1.390E-06 | 4.781E-07 |
| 3933 | G13B_A | Y10B_A | S9B_A  | V24B_T | 1.1E-06 | 1.7E-06 | 1.390E-06 | 2.292E-07 |
| 3934 | Y10B_A | E18B_A | F19B_Q | L23B_Q | 6.6E-07 | 2.1E-06 | 1.390E-06 | 4.535E-07 |
| 3935 | Y10B_A | L23B_R | V24B_T | Q14B_A | 9.3E-07 | 2.2E-06 | 1.391E-06 | 3.332E-07 |
| 3936 | Y10B_A | G13B_W | F19B_A | V24B_Q | 6.2E-07 | 2.8E-06 | 1.391E-06 | 6.034E-07 |
| 3937 | Y10B_A | F3B_A  | I20B_Q | K17B_A | 4.7E-07 | 2.1E-06 | 1.391E-06 | 4.519E-07 |
| 3938 | Y10B_A | D6B_A  | E18B_T | V24B_Q | 6.8E-07 | 2.3E-06 | 1.391E-06 | 3.959E-07 |
| 3939 | G13B_A | S8B_A  | I20B_Q | T4B_A  | 8.3E-07 | 2.5E-06 | 1.392E-06 | 4.808E-07 |
| 3940 | Y10B_A | V7B_A  | I20B_Q | T4B_A  | 5.1E-07 | 2.5E-06 | 1.392E-06 | 5.250E-07 |
| 3941 | Y10B_A | E18B_T | L23B_Q | F19B_A | 6.9E-07 | 3.2E-06 | 1.393E-06 | 6.927E-07 |
| 3942 | G13B_A | Y10B_A | V24B_Q | E12B_A | 6.8E-07 | 1.9E-06 | 1.393E-06 | 3.438E-07 |
| 3943 | S8B_A  | D6B_A  | I20B_S | T2B_A  | 7.6E-07 | 2.0E-06 | 1.393E-06 | 3.455E-07 |
| 3944 | Y10B_A | S8B_A  | I20B_Q | E18B_A | 6.2E-07 | 2.1E-06 | 1.394E-06 | 4.005E-07 |
| 3945 | Y10B_A | F3B_A  | F19B_Q | L23B_R | 5.0E-07 | 2.3E-06 | 1.394E-06 | 4.392E-07 |
| 3946 | Y10B_A | I20B_N | T4B_A  | F19B_A | 7.1E-07 | 2.3E-06 | 1.394E-06 | 5.127E-07 |
| 3947 | Y10B_A | G13B_W | A16B_N | V24B_N | 5.7E-07 | 2.4E-06 | 1.394E-06 | 4.829E-07 |
| 3948 | G13B_A | S8B_A  | I20B_T | T2B_A  | 8.3E-07 | 2.5E-06 | 1.395E-06 | 4.345E-07 |
| 3949 | Y10B_A | G1B_R  | V24B_T | E12B_A | 6.9E-07 | 2.4E-06 | 1.396E-06 | 3.702E-07 |
| 3950 | G13B_A | S8B_A  | I20B_N | T4B_A  | 8.3E-07 | 2.5E-06 | 1.396E-06 | 4.789E-07 |
| 3951 | S8B_A  | G13B_W | L11B_A | L23B_Q | 3.7E-07 | 2.5E-06 | 1.396E-06 | 5.648E-07 |

|      |        |        |        |        |         |         |           |           |
|------|--------|--------|--------|--------|---------|---------|-----------|-----------|
| 3952 | G13B_A | E18B_T | K17B_S | G1B_A  | 5.7E-07 | 2.3E-06 | 1.396E-06 | 4.678E-07 |
| 3953 | S8B_A  | G13B_W | E18B_T | F19B_W | 6.2E-07 | 2.6E-06 | 1.396E-06 | 4.806E-07 |
| 3954 | Y10B_A | I20B_T | T2B_A  | G1B_A  | 8.3E-07 | 2.3E-06 | 1.396E-06 | 3.365E-07 |
| 3955 | G13B_A | Y10B_A | I20B_S | T2B_A  | 8.3E-07 | 2.3E-06 | 1.397E-06 | 4.349E-07 |
| 3956 | G13B_A | S9B_A  | V24B_T | T2B_A  | 9.2E-07 | 2.3E-06 | 1.397E-06 | 3.577E-07 |
| 3957 | Y10B_A | I20B_T | T4B_A  | G1B_A  | 7.9E-07 | 2.3E-06 | 1.398E-06 | 3.761E-07 |
| 3958 | Y10B_A | I20B_T | K17B_A | F19B_A | 9.1E-07 | 2.0E-06 | 1.398E-06 | 3.311E-07 |
| 3959 | G13B_A | S8B_A  | I20B_T | T4B_A  | 8.3E-07 | 2.2E-06 | 1.399E-06 | 4.059E-07 |
| 3960 | Y10B_A | F3B_A  | E18B_T | V24B_T | 7.5E-07 | 2.2E-06 | 1.399E-06 | 3.902E-07 |
| 3961 | Y10B_A | I20B_N | L11B_A | Q14B_A | 6.3E-07 | 2.2E-06 | 1.399E-06 | 3.983E-07 |
| 3962 | G13B_A | S8B_A  | I20B_Q | S5B_A  | 8.4E-07 | 2.5E-06 | 1.399E-06 | 4.462E-07 |
| 3963 | Y10B_A | F3B_A  | S9B_A  | V24B_N | 8.2E-07 | 2.2E-06 | 1.400E-06 | 3.918E-07 |
| 3964 | Y10B_A | F3B_A  | L23B_R | K17B_S | 6.8E-07 | 2.4E-06 | 1.400E-06 | 4.104E-07 |
| 3965 | S8B_A  | D6B_A  | G13B_W | V24B_N | 6.6E-07 | 2.8E-06 | 1.400E-06 | 4.721E-07 |
| 3966 | G13B_A | F19B_W | T4B_A  | V24B_Q | 6.1E-07 | 3.8E-06 | 1.400E-06 | 8.090E-07 |
| 3967 | G13B_A | E18B_T | S5B_A  | V24B_Q | 7.5E-07 | 2.4E-06 | 1.400E-06 | 4.939E-07 |
| 3968 | Y10B_A | F3B_A  | F19B_W | L23B_Q | 7.8E-07 | 3.1E-06 | 1.401E-06 | 6.112E-07 |
| 3969 | Y10B_A | T4B_A  | L23B_R | V24B_T | 8.2E-07 | 3.1E-06 | 1.401E-06 | 5.116E-07 |
| 3970 | Y10B_A | I20B_S | E18B_A | T4B_A  | 8.9E-07 | 2.1E-06 | 1.401E-06 | 3.621E-07 |
| 3971 | Y10B_A | D6B_A  | I20B_Q | S5B_A  | 8.6E-07 | 2.3E-06 | 1.402E-06 | 4.122E-07 |
| 3972 | G13B_A | A16B_N | L11B_A | V24B_N | 2.6E-07 | 3.3E-06 | 1.402E-06 | 8.653E-07 |
| 3973 | G13B_A | S8B_A  | V24B_T | E12B_A | 8.1E-07 | 2.3E-06 | 1.402E-06 | 4.715E-07 |
| 3974 | G13B_A | I20B_T | E18B_A | K17B_A | 7.7E-07 | 2.7E-06 | 1.402E-06 | 4.670E-07 |
| 3975 | Y10B_A | V7B_A  | I20B_T | S5B_A  | 8.3E-07 | 2.3E-06 | 1.403E-06 | 3.750E-07 |
| 3976 | G13B_A | S9B_A  | L23B_R | T2B_A  | 8.3E-07 | 2.1E-06 | 1.403E-06 | 3.328E-07 |
| 3977 | Y10B_A | V7B_A  | I20B_S | Q14B_A | 8.2E-07 | 2.3E-06 | 1.403E-06 | 4.321E-07 |
| 3978 | G13B_A | V24B_T | Q14B_A | E12B_A | 8.4E-07 | 2.2E-06 | 1.404E-06 | 3.414E-07 |
| 3979 | G13B_A | F3B_A  | V24B_T | G1B_A  | 9.3E-07 | 1.8E-06 | 1.404E-06 | 2.549E-07 |
| 3980 | G13B_A | D6B_A  | G1B_R  | V24B_Q | 8.9E-07 | 2.9E-06 | 1.404E-06 | 4.510E-07 |
| 3981 | G13B_A | L11B_A | L23B_Q | F19B_A | 7.1E-07 | 2.2E-06 | 1.404E-06 | 4.135E-07 |
| 3982 | G13B_A | I20B_S | T4B_A  | Q14B_A | 8.3E-07 | 2.2E-06 | 1.404E-06 | 3.314E-07 |
| 3983 | G13B_A | S5B_A  | L23B_Q | E12B_A | 7.3E-07 | 2.3E-06 | 1.404E-06 | 4.899E-07 |
| 3984 | S8B_A  | V7B_A  | I20B_N | Q14B_A | 8.7E-07 | 2.5E-06 | 1.405E-06 | 4.356E-07 |
| 3985 | G13B_A | F3B_A  | A16B_N | L23B_Q | 4.0E-07 | 2.3E-06 | 1.405E-06 | 5.558E-07 |
| 3986 | G13B_A | V24B_Q | T2B_A  | E12B_A | 7.6E-07 | 1.9E-06 | 1.405E-06 | 3.020E-07 |
| 3987 | Y10B_A | A16B_N | L23B_R | K17B_S | 4.5E-07 | 4.2E-06 | 1.405E-06 | 7.860E-07 |
| 3988 | Y10B_A | S8B_A  | L11B_A | I20B_S | 9.3E-07 | 2.3E-06 | 1.405E-06 | 3.382E-07 |
| 3989 | Y10B_A | F3B_A  | L23B_Q | E12B_A | 7.6E-07 | 3.1E-06 | 1.406E-06 | 5.819E-07 |
| 3990 | Y10B_A | V7B_A  | E18B_T | V24B_T | 6.4E-07 | 2.5E-06 | 1.406E-06 | 4.348E-07 |
| 3991 | Y10B_A | G13B_W | G1B_R  | F19B_Q | 7.0E-07 | 2.3E-06 | 1.406E-06 | 4.455E-07 |
| 3992 | Y10B_A | T4B_A  | F19B_Q | V24B_N | 6.1E-07 | 2.8E-06 | 1.407E-06 | 5.820E-07 |
| 3993 | Y10B_A | F3B_A  | I20B_N | T4B_A  | 8.7E-07 | 2.3E-06 | 1.407E-06 | 4.227E-07 |
| 3994 | G13B_A | I20B_Q | S5B_A  | T2B_A  | 6.8E-07 | 2.2E-06 | 1.408E-06 | 3.976E-07 |
| 3995 | Y10B_A | V7B_A  | F19B_Q | K17B_S | 5.8E-07 | 2.3E-06 | 1.408E-06 | 4.709E-07 |
| 3996 | Y10B_A | A16B_N | I20B_N | T4B_A  | 4.0E-07 | 2.3E-06 | 1.408E-06 | 6.083E-07 |
| 3997 | Y10B_A | I20B_T | L11B_A | Q14B_A | 8.2E-07 | 2.3E-06 | 1.408E-06 | 4.230E-07 |
| 3998 | G13B_A | E18B_T | F19B_A | E12B_A | 6.1E-07 | 2.8E-06 | 1.409E-06 | 6.412E-07 |
| 3999 | Y10B_A | L23B_R | T2B_A  | V24B_N | 6.8E-07 | 2.6E-06 | 1.409E-06 | 5.093E-07 |
| 4000 | Y10B_A | I20B_T | Q14B_A | G1B_A  | 8.3E-07 | 1.9E-06 | 1.410E-06 | 2.998E-07 |
| 4001 | G13B_A | I20B_S | S5B_A  | T4B_A  | 8.3E-07 | 2.0E-06 | 1.410E-06 | 3.753E-07 |
| 4002 | Y10B_A | S8B_A  | L23B_R | V24B_T | 5.5E-07 | 2.5E-06 | 1.410E-06 | 4.889E-07 |
| 4003 | Y10B_A | A16B_N | K17B_S | V24B_T | 4.1E-07 | 4.8E-06 | 1.410E-06 | 9.156E-07 |

|      |        |        |        |        |         |         |           |           |
|------|--------|--------|--------|--------|---------|---------|-----------|-----------|
| 4004 | Y10B_A | L11B_A | I20B_Q | K17B_A | 7.6E-07 | 2.9E-06 | 1.411E-06 | 4.988E-07 |
| 4005 | Y10B_A | D6B_A  | F19B_W | V24B_Q | 8.7E-07 | 2.1E-06 | 1.411E-06 | 3.886E-07 |
| 4006 | S8B_A  | D6B_A  | G13B_W | V24B_T | 9.3E-07 | 2.1E-06 | 1.411E-06 | 2.703E-07 |
| 4007 | Y10B_A | S8B_A  | F3B_A  | I20B_S | 7.1E-07 | 2.2E-06 | 1.412E-06 | 4.191E-07 |
| 4008 | G13B_A | S8B_A  | I20B_S | Q14B_A | 7.4E-07 | 2.4E-06 | 1.413E-06 | 5.113E-07 |
| 4009 | Y10B_A | A16B_N | I20B_Q | T2B_A  | 5.6E-07 | 2.5E-06 | 1.413E-06 | 6.102E-07 |
| 4010 | Y10B_A | V7B_A  | F19B_W | V24B_N | 5.9E-07 | 2.1E-06 | 1.414E-06 | 4.149E-07 |
| 4011 | Y10B_A | S8B_A  | K17B_S | V24B_Q | 6.5E-07 | 2.2E-06 | 1.414E-06 | 4.525E-07 |
| 4012 | Y10B_A | S9B_A  | V24B_T | G1B_A  | 1.0E-06 | 2.1E-06 | 1.415E-06 | 2.961E-07 |
| 4013 | G13B_A | S8B_A  | F19B_W | V24B_Q | 6.2E-07 | 2.8E-06 | 1.415E-06 | 5.932E-07 |
| 4014 | Y10B_A | S8B_A  | I20B_T | G1B_A  | 1.0E-06 | 2.3E-06 | 1.415E-06 | 3.249E-07 |
| 4015 | Y10B_A | A16B_N | S9B_A  | V24B_Q | 2.2E-07 | 2.8E-06 | 1.415E-06 | 7.120E-07 |
| 4016 | G13B_A | V7B_A  | F3B_A  | V24B_N | 7.6E-07 | 2.4E-06 | 1.416E-06 | 4.887E-07 |
| 4017 | Y10B_A | E18B_A | E12B_A | V24B_N | 8.6E-07 | 2.3E-06 | 1.416E-06 | 3.424E-07 |
| 4018 | G13B_A | F3B_A  | E18B_T | E12B_A | 9.4E-07 | 2.3E-06 | 1.416E-06 | 4.085E-07 |
| 4019 | G13B_A | Y10B_A | E18B_T | F19B_Q | 4.4E-07 | 2.3E-06 | 1.416E-06 | 5.369E-07 |
| 4020 | G13B_A | E18B_A | F19B_W | L23B_R | 5.5E-07 | 2.0E-06 | 1.416E-06 | 4.452E-07 |
| 4021 | S8B_A  | D6B_A  | S9B_A  | V24B_T | 8.0E-07 | 2.1E-06 | 1.417E-06 | 2.778E-07 |
| 4022 | G13B_A | A16B_N | E18B_T | K17B_S | 4.6E-07 | 3.0E-06 | 1.417E-06 | 6.336E-07 |
| 4023 | Y10B_A | D6B_A  | I20B_Q | T4B_A  | 8.6E-07 | 2.7E-06 | 1.418E-06 | 5.359E-07 |
| 4024 | G13B_A | Y10B_A | L23B_Q | E12B_A | 7.3E-07 | 2.5E-06 | 1.419E-06 | 3.631E-07 |
| 4025 | Y10B_A | S8B_A  | I20B_S | G1B_A  | 8.4E-07 | 2.8E-06 | 1.419E-06 | 4.537E-07 |
| 4026 | Y10B_A | I20B_S | Q14B_A | G1B_A  | 8.3E-07 | 2.2E-06 | 1.419E-06 | 4.280E-07 |
| 4027 | S8B_A  | G13B_W | F19B_W | S9B_A  | 6.2E-07 | 2.5E-06 | 1.419E-06 | 3.848E-07 |
| 4028 | Y10B_A | E18B_A | L23B_R | K17B_S | 7.8E-07 | 2.2E-06 | 1.420E-06 | 4.194E-07 |
| 4029 | S8B_A  | D6B_A  | I20B_Q | T2B_A  | 8.6E-07 | 2.1E-06 | 1.420E-06 | 3.638E-07 |
| 4030 | G13B_A | A16B_N | F19B_A | V24B_N | 5.1E-07 | 3.0E-06 | 1.420E-06 | 6.046E-07 |
| 4031 | Y10B_A | L11B_A | L23B_Q | E12B_A | 5.9E-07 | 2.5E-06 | 1.420E-06 | 4.726E-07 |
| 4032 | Y10B_A | A16B_N | I20B_S | T2B_A  | 4.7E-07 | 2.5E-06 | 1.421E-06 | 5.624E-07 |
| 4033 | Y10B_A | E18B_T | F19B_A | V24B_N | 4.8E-07 | 3.9E-06 | 1.421E-06 | 8.117E-07 |
| 4034 | Y10B_A | F3B_A  | F19B_W | V24B_Q | 5.2E-07 | 2.4E-06 | 1.422E-06 | 4.844E-07 |
| 4035 | Y10B_A | S8B_A  | D6B_A  | I20B_Q | 8.6E-07 | 2.3E-06 | 1.422E-06 | 4.277E-07 |
| 4036 | Y10B_A | F3B_A  | S9B_A  | L23B_R | 7.6E-07 | 2.1E-06 | 1.422E-06 | 3.979E-07 |
| 4037 | Y10B_A | G13B_W | F3B_A  | L23B_R | 8.1E-07 | 2.1E-06 | 1.423E-06 | 3.649E-07 |
| 4038 | G13B_A | S8B_A  | K17B_S | V24B_T | 6.8E-07 | 2.8E-06 | 1.423E-06 | 4.867E-07 |
| 4039 | Y10B_A | S8B_A  | L23B_Q | V24B_Q | 4.7E-07 | 3.3E-06 | 1.423E-06 | 5.922E-07 |
| 4040 | Y10B_A | S9B_A  | L23B_Q | G1B_A  | 8.4E-07 | 2.5E-06 | 1.424E-06 | 3.828E-07 |
| 4041 | G13B_A | F19B_W | S9B_A  | G1B_A  | 8.8E-07 | 2.3E-06 | 1.424E-06 | 3.713E-07 |
| 4042 | Y10B_A | A16B_N | I20B_T | Q14B_A | 4.0E-07 | 2.3E-06 | 1.424E-06 | 5.340E-07 |
| 4043 | G13B_A | Y10B_A | I20B_T | T4B_A  | 1.0E-06 | 2.2E-06 | 1.425E-06 | 3.275E-07 |
| 4044 | Y10B_A | D6B_A  | E18B_T | F19B_Q | 6.0E-07 | 2.6E-06 | 1.425E-06 | 5.783E-07 |
| 4045 | Y10B_A | S8B_A  | I20B_T | E18B_A | 6.2E-07 | 2.5E-06 | 1.426E-06 | 4.864E-07 |
| 4046 | G13B_A | S9B_A  | V24B_T | Q14B_A | 9.2E-07 | 2.5E-06 | 1.426E-06 | 3.985E-07 |
| 4047 | Y10B_A | S9B_A  | L23B_R | F19B_A | 8.4E-07 | 2.3E-06 | 1.426E-06 | 3.978E-07 |
| 4048 | G13B_A | A16B_N | K17B_S | E12B_A | 3.0E-07 | 3.1E-06 | 1.426E-06 | 8.044E-07 |
| 4049 | G13B_A | Y10B_A | I20B_S | S5B_A  | 8.7E-07 | 2.8E-06 | 1.427E-06 | 4.694E-07 |
| 4050 | Y10B_A | G13B_W | L11B_A | V24B_Q | 7.3E-07 | 2.4E-06 | 1.427E-06 | 4.230E-07 |
| 4051 | G13B_A | S8B_A  | I20B_S | T4B_A  | 7.1E-07 | 2.3E-06 | 1.427E-06 | 3.584E-07 |
| 4052 | G13B_A | E18B_T | F19B_Q | Q14B_A | 5.4E-07 | 2.5E-06 | 1.427E-06 | 5.402E-07 |
| 4053 | G13B_A | F19B_Q | S9B_A  | G1B_A  | 6.6E-07 | 2.4E-06 | 1.427E-06 | 4.550E-07 |
| 4054 | Y10B_A | F19B_Q | T2B_A  | V24B_N | 5.8E-07 | 3.9E-06 | 1.428E-06 | 7.699E-07 |
| 4055 | Y10B_A | S8B_A  | V7B_A  | I20B_N | 8.2E-07 | 2.3E-06 | 1.428E-06 | 5.091E-07 |

|      |        |        |        |        |         |         |           |           |
|------|--------|--------|--------|--------|---------|---------|-----------|-----------|
| 4056 | Y10B_A | E18B_A | F19B_W | V24B_Q | 4.8E-07 | 2.7E-06 | 1.428E-06 | 5.978E-07 |
| 4057 | Y10B_A | S8B_A  | I20B_N | E18B_A | 8.5E-07 | 2.0E-06 | 1.429E-06 | 4.153E-07 |
| 4058 | Y10B_A | G13B_W | L11B_A | F19B_Q | 6.2E-07 | 2.4E-06 | 1.430E-06 | 4.680E-07 |
| 4059 | Y10B_A | A16B_N | F19B_W | V24B_T | 4.9E-07 | 2.6E-06 | 1.430E-06 | 6.549E-07 |
| 4060 | S8B_A  | G13B_W | F3B_A  | F19B_Q | 8.5E-07 | 2.8E-06 | 1.430E-06 | 5.120E-07 |
| 4061 | G13B_A | Y10B_A | I20B_N | S5B_A  | 8.3E-07 | 2.2E-06 | 1.430E-06 | 3.526E-07 |
| 4062 | G13B_A | L23B_R | Q14B_A | E12B_A | 1.0E-06 | 2.1E-06 | 1.430E-06 | 3.262E-07 |
| 4063 | Y10B_A | A16B_N | I20B_N | Q14B_A | 4.7E-07 | 3.3E-06 | 1.430E-06 | 6.597E-07 |
| 4064 | G13B_A | Y10B_A | I20B_N | Q14B_A | 8.3E-07 | 2.2E-06 | 1.430E-06 | 3.511E-07 |
| 4065 | Y10B_A | E18B_T | L11B_A | L23B_Q | 7.9E-07 | 2.3E-06 | 1.431E-06 | 4.570E-07 |
| 4066 | G13B_A | S5B_A  | E12B_A | V24B_N | 9.4E-07 | 3.0E-06 | 1.431E-06 | 4.633E-07 |
| 4067 | Y10B_A | I20B_T | L11B_A | T4B_A  | 7.4E-07 | 1.9E-06 | 1.431E-06 | 3.792E-07 |
| 4068 | G13B_A | T2B_A  | E12B_A | V24B_N | 6.8E-07 | 2.6E-06 | 1.431E-06 | 4.431E-07 |
| 4069 | Y10B_A | S5B_A  | K17B_S | V24B_Q | 5.3E-07 | 2.9E-06 | 1.432E-06 | 6.355E-07 |
| 4070 | Y10B_A | D6B_A  | V24B_Q | E12B_A | 9.4E-07 | 2.4E-06 | 1.432E-06 | 3.570E-07 |
| 4071 | G13B_A | I20B_T | S5B_A  | Q14B_A | 8.3E-07 | 2.5E-06 | 1.433E-06 | 4.124E-07 |
| 4072 | G13B_A | L23B_Q | F19B_A | G1B_A  | 7.6E-07 | 2.3E-06 | 1.433E-06 | 4.531E-07 |
| 4073 | Y10B_A | A16B_N | I20B_T | K17B_A | 4.8E-07 | 2.3E-06 | 1.433E-06 | 6.301E-07 |
| 4074 | Y10B_A | E18B_T | L23B_Q | G1B_A  | 6.6E-07 | 2.8E-06 | 1.434E-06 | 5.888E-07 |
| 4075 | G13B_A | E18B_A | F19B_A | V24B_N | 9.2E-07 | 2.0E-06 | 1.434E-06 | 3.292E-07 |
| 4076 | S8B_A  | D6B_A  | V24B_T | E12B_A | 1.0E-06 | 2.1E-06 | 1.435E-06 | 3.150E-07 |
| 4077 | Y10B_A | F3B_A  | L23B_R | E12B_A | 8.1E-07 | 2.5E-06 | 1.435E-06 | 4.692E-07 |
| 4078 | Y10B_A | S8B_A  | F19B_Q | V24B_T | 7.4E-07 | 3.0E-06 | 1.435E-06 | 5.956E-07 |
| 4079 | Y10B_A | E18B_A | K17B_S | V24B_T | 9.0E-07 | 2.2E-06 | 1.435E-06 | 4.120E-07 |
| 4080 | G13B_A | I20B_N | Q14B_A | T2B_A  | 7.4E-07 | 2.4E-06 | 1.435E-06 | 4.682E-07 |
| 4081 | G13B_A | E18B_T | E12B_A | G1B_A  | 7.4E-07 | 2.6E-06 | 1.435E-06 | 4.548E-07 |
| 4082 | Y10B_A | L11B_A | S9B_A  | V24B_N | 6.3E-07 | 2.9E-06 | 1.435E-06 | 4.736E-07 |
| 4083 | G13B_A | L11B_A | G1B_R  | L23B_R | 7.3E-07 | 2.2E-06 | 1.436E-06 | 4.363E-07 |
| 4084 | G13B_A | K17B_S | E12B_A | G1B_A  | 8.0E-07 | 2.5E-06 | 1.436E-06 | 4.239E-07 |
| 4085 | G13B_A | S8B_A  | I20B_N | S5B_A  | 8.3E-07 | 2.2E-06 | 1.436E-06 | 4.090E-07 |
| 4086 | G13B_A | S8B_A  | S9B_A  | V24B_T | 7.8E-07 | 2.4E-06 | 1.437E-06 | 3.954E-07 |
| 4087 | G13B_A | Y10B_A | I20B_N | T4B_A  | 7.1E-07 | 2.5E-06 | 1.438E-06 | 5.299E-07 |
| 4088 | Y10B_A | A16B_N | S9B_A  | V24B_T | 3.6E-07 | 2.7E-06 | 1.438E-06 | 5.630E-07 |
| 4089 | G13B_A | V7B_A  | L11B_A | V24B_N | 7.3E-07 | 2.9E-06 | 1.438E-06 | 5.040E-07 |
| 4090 | Y10B_A | S8B_A  | I20B_Q | G1B_A  | 3.6E-07 | 2.3E-06 | 1.439E-06 | 5.874E-07 |
| 4091 | S8B_A  | G13B_W | G1B_R  | F19B_Q | 6.3E-07 | 3.2E-06 | 1.439E-06 | 5.700E-07 |
| 4092 | Y10B_A | V7B_A  | I20B_Q | K17B_A | 7.6E-07 | 2.5E-06 | 1.439E-06 | 5.406E-07 |
| 4093 | Y10B_A | L11B_A | F19B_W | V24B_N | 7.3E-07 | 2.8E-06 | 1.439E-06 | 5.205E-07 |
| 4094 | S8B_A  | G13B_W | E18B_T | E12B_A | 1.0E-06 | 2.0E-06 | 1.440E-06 | 2.761E-07 |
| 4095 | G13B_A | I20B_N | E18B_A | K17B_A | 9.0E-07 | 2.0E-06 | 1.440E-06 | 2.963E-07 |
| 4096 | Y10B_A | V7B_A  | S9B_A  | L23B_Q | 9.0E-07 | 2.0E-06 | 1.440E-06 | 3.016E-07 |
| 4097 | G13B_A | S8B_A  | F19B_W | V24B_N | 8.3E-07 | 3.2E-06 | 1.441E-06 | 5.125E-07 |
| 4098 | G13B_A | S8B_A  | F19B_W | L23B_Q | 5.4E-07 | 2.8E-06 | 1.441E-06 | 5.592E-07 |
| 4099 | Y10B_A | F3B_A  | I20B_T | T2B_A  | 8.4E-07 | 1.9E-06 | 1.442E-06 | 3.194E-07 |
| 4100 | Y10B_A | I20B_S | G1B_R  | T2B_A  | 8.5E-07 | 2.6E-06 | 1.442E-06 | 3.802E-07 |
| 4101 | Y10B_A | E18B_T | L23B_R | F19B_A | 6.0E-07 | 2.3E-06 | 1.443E-06 | 4.852E-07 |
| 4102 | G13B_A | E18B_T | L11B_A | F19B_Q | 6.1E-07 | 3.3E-06 | 1.444E-06 | 7.775E-07 |
| 4103 | Y10B_A | I20B_S | E18B_A | Q14B_A | 8.9E-07 | 2.3E-06 | 1.444E-06 | 3.833E-07 |
| 4104 | G13B_A | E18B_T | T4B_A  | V24B_T | 7.8E-07 | 2.1E-06 | 1.445E-06 | 4.113E-07 |
| 4105 | G13B_A | S8B_A  | I20B_S | S5B_A  | 8.7E-07 | 2.2E-06 | 1.445E-06 | 3.590E-07 |
| 4106 | G13B_A | S5B_A  | S9B_A  | V24B_T | 1.0E-06 | 2.1E-06 | 1.445E-06 | 3.000E-07 |
| 4107 | Y10B_A | G13B_W | K17B_S | F19B_A | 8.1E-07 | 2.3E-06 | 1.445E-06 | 4.278E-07 |



|      |        |        |        |        |         |         |           |           |
|------|--------|--------|--------|--------|---------|---------|-----------|-----------|
| 4108 | G13B_A | V7B_A  | V24B_Q | G1B_A  | 1.0E-06 | 2.9E-06 | 1.445E-06 | 4.298E-07 |
| 4109 | Y10B_A | E18B_A | S9B_A  | V24B_T | 8.4E-07 | 2.1E-06 | 1.447E-06 | 2.963E-07 |
| 4110 | G13B_A | E18B_A | V24B_N | G1B_A  | 6.5E-07 | 2.4E-06 | 1.448E-06 | 4.736E-07 |
| 4111 | G13B_A | D6B_A  | F19B_Q | E12B_A | 5.6E-07 | 2.3E-06 | 1.449E-06 | 4.975E-07 |
| 4112 | G13B_A | D6B_A  | E18B_T | K17B_S | 9.0E-07 | 2.3E-06 | 1.450E-06 | 3.692E-07 |
| 4113 | S8B_A  | D6B_A  | I20B_T | T2B_A  | 8.5E-07 | 2.5E-06 | 1.450E-06 | 4.307E-07 |
| 4114 | Y10B_A | V24B_T | E12B_A | G1B_A  | 8.4E-07 | 2.7E-06 | 1.450E-06 | 4.843E-07 |
| 4115 | G13B_A | I20B_S | E18B_A | K17B_A | 9.0E-07 | 2.1E-06 | 1.450E-06 | 3.364E-07 |
| 4116 | Y10B_A | A16B_N | L23B_Q | K17B_S | 4.6E-07 | 2.6E-06 | 1.451E-06 | 6.557E-07 |
| 4117 | G13B_A | V7B_A  | G1B_R  | L23B_Q | 7.6E-07 | 2.6E-06 | 1.453E-06 | 5.433E-07 |
| 4118 | Y10B_A | F3B_A  | I20B_S | Q14B_A | 9.8E-07 | 3.0E-06 | 1.453E-06 | 4.499E-07 |
| 4119 | G13B_A | Y10B_A | V24B_T | E12B_A | 7.2E-07 | 3.3E-06 | 1.453E-06 | 5.370E-07 |
| 4120 | G13B_A | S9B_A  | F19B_A | E12B_A | 9.9E-07 | 2.2E-06 | 1.454E-06 | 3.402E-07 |
| 4121 | Y10B_A | D6B_A  | I20B_T | T2B_A  | 5.8E-07 | 2.3E-06 | 1.454E-06 | 3.910E-07 |
| 4122 | G13B_A | F3B_A  | L23B_Q | F19B_A | 6.7E-07 | 2.4E-06 | 1.454E-06 | 5.229E-07 |
| 4123 | Y10B_A | D6B_A  | I20B_N | Q14B_A | 8.9E-07 | 2.1E-06 | 1.454E-06 | 4.188E-07 |
| 4124 | Y10B_A | L11B_A | I20B_Q | T2B_A  | 9.3E-07 | 2.2E-06 | 1.454E-06 | 3.586E-07 |
| 4125 | Y10B_A | V7B_A  | L23B_Q | E12B_A | 8.6E-07 | 2.9E-06 | 1.456E-06 | 4.725E-07 |
| 4126 | G13B_A | V7B_A  | L23B_Q | F19B_A | 6.4E-07 | 2.4E-06 | 1.456E-06 | 4.676E-07 |
| 4127 | G13B_A | L11B_A | G1B_R  | V24B_T | 8.3E-07 | 2.3E-06 | 1.456E-06 | 3.679E-07 |
| 4128 | Y10B_A | G13B_W | E18B_A | V24B_T | 7.8E-07 | 2.1E-06 | 1.457E-06 | 3.397E-07 |
| 4129 | G13B_A | S8B_A  | E18B_T | L23B_R | 7.9E-07 | 2.3E-06 | 1.457E-06 | 4.078E-07 |
| 4130 | G13B_A | A16B_N | V24B_Q | G1B_A  | 3.7E-07 | 3.1E-06 | 1.457E-06 | 6.376E-07 |
| 4131 | Y10B_A | F19B_Q | V24B_Q | Q14B_A | 5.2E-07 | 3.0E-06 | 1.458E-06 | 7.282E-07 |
| 4132 | G13B_A | D6B_A  | I20B_N | K17B_A | 6.5E-07 | 2.3E-06 | 1.458E-06 | 4.859E-07 |
| 4133 | S8B_A  | D6B_A  | F19B_Q | K17B_S | 4.5E-07 | 2.9E-06 | 1.458E-06 | 6.638E-07 |
| 4134 | G13B_A | K17B_A | F19B_Q | V24B_T | 6.8E-07 | 3.5E-06 | 1.458E-06 | 6.154E-07 |
| 4135 | Y10B_A | D6B_A  | E18B_T | L23B_Q | 7.4E-07 | 2.8E-06 | 1.458E-06 | 5.416E-07 |
| 4136 | G13B_A | A16B_N | S9B_A  | K17B_S | 3.6E-07 | 3.1E-06 | 1.459E-06 | 6.919E-07 |
| 4137 | G13B_A | E18B_T | V24B_Q | T2B_A  | 5.4E-07 | 3.0E-06 | 1.460E-06 | 6.010E-07 |
| 4138 | Y10B_A | S9B_A  | L23B_R | G1B_A  | 8.3E-07 | 2.1E-06 | 1.460E-06 | 3.590E-07 |
| 4139 | Y10B_A | E18B_A | V24B_Q | E12B_A | 7.4E-07 | 2.5E-06 | 1.461E-06 | 4.441E-07 |
| 4140 | Y10B_A | G13B_W | L23B_Q | G1B_A  | 9.2E-07 | 2.1E-06 | 1.461E-06 | 3.200E-07 |
| 4141 | S8B_A  | D6B_A  | G13B_W | L23B_Q | 6.0E-07 | 2.4E-06 | 1.461E-06 | 4.430E-07 |
| 4142 | Y10B_A | L23B_Q | F19B_A | E12B_A | 6.0E-07 | 2.5E-06 | 1.462E-06 | 4.831E-07 |
| 4143 | S8B_A  | G13B_W | V7B_A  | L23B_R | 9.5E-07 | 2.4E-06 | 1.462E-06 | 4.009E-07 |
| 4144 | Y10B_A | A16B_N | E18B_T | L23B_R | 3.4E-07 | 3.3E-06 | 1.462E-06 | 8.176E-07 |
| 4145 | S8B_A  | D6B_A  | I20B_Q | S5B_A  | 8.1E-07 | 2.0E-06 | 1.463E-06 | 3.238E-07 |
| 4146 | G13B_A | S5B_A  | F19B_Q | S9B_A  | 4.6E-07 | 2.1E-06 | 1.463E-06 | 4.282E-07 |
| 4147 | Y10B_A | L23B_R | K17B_S | G1B_A  | 7.2E-07 | 2.5E-06 | 1.464E-06 | 4.220E-07 |
| 4148 | G13B_A | A16B_N | G1B_R  | L23B_Q | 3.5E-07 | 3.1E-06 | 1.464E-06 | 8.610E-07 |
| 4149 | Y10B_A | V7B_A  | I20B_S | T2B_A  | 9.8E-07 | 2.2E-06 | 1.464E-06 | 3.312E-07 |
| 4150 | Y10B_A | S5B_A  | F19B_Q | L23B_Q | 4.3E-07 | 2.6E-06 | 1.465E-06 | 5.085E-07 |
| 4151 | G13B_A | D6B_A  | E18B_T | E12B_A | 8.3E-07 | 2.4E-06 | 1.465E-06 | 4.596E-07 |
| 4152 | G13B_A | T4B_A  | S9B_A  | L23B_Q | 8.0E-07 | 2.5E-06 | 1.466E-06 | 5.322E-07 |
| 4153 | Y10B_A | F19B_Q | K17B_S | G1B_A  | 6.5E-07 | 3.3E-06 | 1.467E-06 | 7.507E-07 |
| 4154 | Y10B_A | G13B_W | G1B_R  | K17B_S | 8.5E-07 | 2.7E-06 | 1.467E-06 | 4.455E-07 |
| 4155 | S8B_A  | D6B_A  | F19B_W | V24B_T | 7.5E-07 | 2.3E-06 | 1.468E-06 | 4.217E-07 |
| 4156 | G13B_A | I20B_Q | S5B_A  | T4B_A  | 5.8E-07 | 2.2E-06 | 1.468E-06 | 3.795E-07 |
| 4157 | Y10B_A | G1B_R  | L23B_R | E12B_A | 7.1E-07 | 2.3E-06 | 1.469E-06 | 3.991E-07 |
| 4158 | G13B_A | F3B_A  | E18B_A | V24B_N | 8.8E-07 | 3.0E-06 | 1.469E-06 | 4.920E-07 |
| 4159 | S8B_A  | D6B_A  | E18B_T | V24B_T | 9.9E-07 | 2.6E-06 | 1.469E-06 | 4.402E-07 |

|      |        |        |        |        |         |         |           |           |
|------|--------|--------|--------|--------|---------|---------|-----------|-----------|
| 4160 | G13B_A | F3B_A  | L23B_Q | G1B_A  | 7.7E-07 | 2.1E-06 | 1.469E-06 | 3.730E-07 |
| 4161 | Y10B_A | L11B_A | S9B_A  | V24B_T | 1.0E-06 | 2.5E-06 | 1.470E-06 | 3.962E-07 |
| 4162 | G13B_A | A16B_N | G1B_R  | L23B_R | 4.0E-07 | 3.4E-06 | 1.470E-06 | 8.379E-07 |
| 4163 | Y10B_A | D6B_A  | F19B_W | L23B_Q | 5.0E-07 | 2.9E-06 | 1.471E-06 | 6.525E-07 |
| 4164 | G13B_A | V7B_A  | F19B_A | V24B_T | 7.3E-07 | 2.5E-06 | 1.471E-06 | 4.494E-07 |
| 4165 | G13B_A | V7B_A  | L11B_A | V24B_T | 8.5E-07 | 2.2E-06 | 1.472E-06 | 3.640E-07 |
| 4166 | G13B_A | V7B_A  | F3B_A  | V24B_Q | 8.5E-07 | 2.4E-06 | 1.472E-06 | 3.959E-07 |
| 4167 | Y10B_A | D6B_A  | I20B_T | S5B_A  | 7.6E-07 | 2.1E-06 | 1.473E-06 | 4.094E-07 |
| 4168 | Y10B_A | F3B_A  | E18B_T | L23B_R | 9.3E-07 | 3.2E-06 | 1.473E-06 | 6.892E-07 |
| 4169 | G13B_A | D6B_A  | V24B_Q | G1B_A  | 9.7E-07 | 2.2E-06 | 1.473E-06 | 3.049E-07 |
| 4170 | G13B_A | Y10B_A | S8B_A  | I20B_S | 5.8E-07 | 2.3E-06 | 1.474E-06 | 4.226E-07 |
| 4171 | Y10B_A | D6B_A  | S9B_A  | L23B_Q | 5.9E-07 | 2.4E-06 | 1.475E-06 | 4.410E-07 |
| 4172 | Y10B_A | E18B_T | S5B_A  | V24B_N | 8.4E-07 | 2.4E-06 | 1.475E-06 | 4.746E-07 |
| 4173 | G13B_A | E18B_A | G1B_R  | V24B_N | 8.5E-07 | 2.1E-06 | 1.475E-06 | 3.680E-07 |
| 4174 | Y10B_A | D6B_A  | I20B_S | Q14B_A | 8.9E-07 | 2.0E-06 | 1.475E-06 | 3.316E-07 |
| 4175 | S8B_A  | D6B_A  | I20B_T | Q14B_A | 8.9E-07 | 2.0E-06 | 1.476E-06 | 3.639E-07 |
| 4176 | Y10B_A | E18B_A | F19B_W | V24B_N | 7.7E-07 | 3.1E-06 | 1.476E-06 | 5.937E-07 |
| 4177 | S8B_A  | D6B_A  | I20B_Q | Q14B_A | 7.3E-07 | 2.5E-06 | 1.477E-06 | 4.034E-07 |
| 4178 | G13B_A | G1B_R  | S9B_A  | E12B_A | 9.2E-07 | 2.8E-06 | 1.477E-06 | 4.584E-07 |
| 4179 | G13B_A | S8B_A  | F19B_W | K17B_S | 8.7E-07 | 2.6E-06 | 1.478E-06 | 4.160E-07 |
| 4180 | Y10B_A | V7B_A  | F19B_Q | S9B_A  | 7.4E-07 | 2.5E-06 | 1.478E-06 | 5.086E-07 |
| 4181 | G13B_A | L11B_A | V24B_N | G1B_A  | 9.6E-07 | 2.2E-06 | 1.478E-06 | 3.592E-07 |
| 4182 | G13B_A | G1B_R  | F19B_A | V24B_T | 9.9E-07 | 2.2E-06 | 1.479E-06 | 3.318E-07 |
| 4183 | Y10B_A | I20B_T | E18B_A | T4B_A  | 6.8E-07 | 2.1E-06 | 1.479E-06 | 4.029E-07 |
| 4184 | G13B_A | F3B_A  | A16B_N | V24B_Q | 3.7E-07 | 2.6E-06 | 1.479E-06 | 6.886E-07 |
| 4185 | Y10B_A | D6B_A  | I20B_N | T4B_A  | 8.9E-07 | 2.3E-06 | 1.479E-06 | 4.182E-07 |
| 4186 | S8B_A  | D6B_A  | L23B_R | K17B_S | 4.8E-07 | 3.3E-06 | 1.480E-06 | 6.519E-07 |
| 4187 | Y10B_A | G1B_R  | F19B_W | L23B_R | 8.5E-07 | 2.4E-06 | 1.480E-06 | 4.076E-07 |
| 4188 | G13B_A | T4B_A  | F19B_Q | K17B_S | 6.0E-07 | 4.5E-06 | 1.481E-06 | 9.437E-07 |
| 4189 | Y10B_A | V7B_A  | E18B_T | L23B_R | 7.1E-07 | 3.5E-06 | 1.481E-06 | 6.195E-07 |
| 4190 | Y10B_A | A16B_N | F19B_Q | K17B_S | 2.8E-07 | 2.6E-06 | 1.481E-06 | 7.829E-07 |
| 4191 | Y10B_A | L11B_A | S9B_A  | L23B_R | 9.3E-07 | 2.4E-06 | 1.482E-06 | 3.956E-07 |
| 4192 | G13B_A | A16B_N | L23B_Q | G1B_A  | 3.8E-07 | 2.7E-06 | 1.482E-06 | 6.463E-07 |
| 4193 | G13B_A | I20B_T | T4B_A  | Q14B_A | 8.3E-07 | 2.5E-06 | 1.483E-06 | 5.016E-07 |
| 4194 | G13B_A | V24B_Q | Q14B_A | E12B_A | 8.0E-07 | 2.8E-06 | 1.483E-06 | 4.895E-07 |
| 4195 | Y10B_A | V7B_A  | G1B_R  | V24B_Q | 6.2E-07 | 3.2E-06 | 1.483E-06 | 6.001E-07 |
| 4196 | G13B_A | S8B_A  | F19B_Q | K17B_S | 7.5E-07 | 2.8E-06 | 1.484E-06 | 6.057E-07 |
| 4197 | Y10B_A | G1B_R  | L23B_Q | E12B_A | 6.8E-07 | 2.9E-06 | 1.484E-06 | 4.865E-07 |
| 4198 | G13B_A | L11B_A | F19B_A | V24B_Q | 7.3E-07 | 2.5E-06 | 1.484E-06 | 4.874E-07 |
| 4199 | S8B_A  | D6B_A  | I20B_T | S5B_A  | 6.5E-07 | 2.5E-06 | 1.484E-06 | 4.585E-07 |
| 4200 | Y10B_A | V7B_A  | V24B_T | E12B_A | 1.1E-06 | 2.2E-06 | 1.485E-06 | 2.870E-07 |
| 4201 | G13B_A | S8B_A  | E18B_T | F19B_Q | 8.2E-07 | 3.1E-06 | 1.485E-06 | 6.673E-07 |
| 4202 | G13B_A | V7B_A  | S9B_A  | E12B_A | 7.2E-07 | 2.2E-06 | 1.485E-06 | 3.359E-07 |
| 4203 | S8B_A  | D6B_A  | S9B_A  | V24B_Q | 5.2E-07 | 2.3E-06 | 1.486E-06 | 5.552E-07 |
| 4204 | Y10B_A | I20B_Q | T4B_A  | Q14B_A | 8.0E-07 | 2.9E-06 | 1.486E-06 | 5.507E-07 |
| 4205 | G13B_A | F19B_W | T4B_A  | L23B_R | 9.1E-07 | 2.3E-06 | 1.486E-06 | 3.644E-07 |
| 4206 | Y10B_A | I20B_S | E18B_A | T2B_A  | 9.0E-07 | 2.5E-06 | 1.487E-06 | 4.299E-07 |
| 4207 | S8B_A  | D6B_A  | F19B_W | V24B_Q | 7.5E-07 | 2.3E-06 | 1.487E-06 | 4.224E-07 |
| 4208 | Y10B_A | E18B_A | S9B_A  | L23B_R | 9.4E-07 | 2.6E-06 | 1.487E-06 | 3.642E-07 |
| 4209 | G13B_A | E18B_A | F19B_W | S9B_A  | 6.6E-07 | 2.3E-06 | 1.487E-06 | 4.184E-07 |
| 4210 | G13B_A | G1B_R  | F19B_W | S9B_A  | 5.5E-07 | 2.7E-06 | 1.487E-06 | 4.684E-07 |
| 4211 | Y10B_A | S5B_A  | F19B_Q | V24B_Q | 4.2E-07 | 5.2E-06 | 1.488E-06 | 9.814E-07 |

|      |        |        |        |        |         |         |           |           |
|------|--------|--------|--------|--------|---------|---------|-----------|-----------|
| 4212 | G13B_A | G1B_R  | F19B_W | L23B_R | 6.4E-07 | 2.4E-06 | 1.488E-06 | 5.407E-07 |
| 4213 | Y10B_A | I20B_N | L11B_A | T2B_A  | 6.8E-07 | 2.3E-06 | 1.489E-06 | 3.993E-07 |
| 4214 | Y10B_A | E18B_A | S9B_A  | V24B_Q | 9.9E-07 | 2.2E-06 | 1.489E-06 | 3.169E-07 |
| 4215 | Y10B_A | E18B_A | F19B_W | V24B_T | 7.5E-07 | 2.6E-06 | 1.490E-06 | 4.666E-07 |
| 4216 | S8B_A  | D6B_A  | E18B_T | L23B_R | 7.9E-07 | 2.5E-06 | 1.490E-06 | 4.841E-07 |
| 4217 | G13B_A | V7B_A  | G1B_R  | V24B_T | 1.0E-06 | 2.2E-06 | 1.490E-06 | 3.582E-07 |
| 4218 | G13B_A | L11B_A | G1B_R  | L23B_Q | 9.9E-07 | 2.6E-06 | 1.490E-06 | 4.358E-07 |
| 4219 | G13B_A | Y10B_A | S9B_A  | L23B_R | 9.2E-07 | 2.7E-06 | 1.491E-06 | 5.021E-07 |
| 4220 | Y10B_A | V7B_A  | E12B_A | V24B_N | 8.4E-07 | 2.1E-06 | 1.492E-06 | 3.528E-07 |
| 4221 | Y10B_A | E18B_A | V24B_T | E12B_A | 8.6E-07 | 3.1E-06 | 1.493E-06 | 5.448E-07 |
| 4222 | Y10B_A | V7B_A  | S9B_A  | L23B_R | 5.7E-07 | 3.7E-06 | 1.493E-06 | 6.963E-07 |
| 4223 | S8B_A  | G13B_W | L23B_R | F19B_A | 8.1E-07 | 3.0E-06 | 1.493E-06 | 4.849E-07 |
| 4224 | G13B_A | F19B_W | L23B_Q | Q14B_A | 7.8E-07 | 2.8E-06 | 1.494E-06 | 4.983E-07 |
| 4225 | Y10B_A | V7B_A  | I20B_S | T4B_A  | 7.9E-07 | 2.3E-06 | 1.494E-06 | 4.681E-07 |
| 4226 | G13B_A | S9B_A  | L23B_R | Q14B_A | 8.2E-07 | 2.5E-06 | 1.495E-06 | 4.244E-07 |
| 4227 | Y10B_A | F3B_A  | V24B_T | E12B_A | 1.1E-06 | 2.2E-06 | 1.495E-06 | 3.546E-07 |
| 4228 | Y10B_A | I20B_Q | S5B_A  | Q14B_A | 8.4E-07 | 2.9E-06 | 1.495E-06 | 5.621E-07 |
| 4229 | S8B_A  | D6B_A  | K17B_S | V24B_T | 7.6E-07 | 2.5E-06 | 1.496E-06 | 4.642E-07 |
| 4230 | G13B_A | F3B_A  | F19B_W | E12B_A | 7.7E-07 | 3.0E-06 | 1.497E-06 | 5.277E-07 |
| 4231 | G13B_A | A16B_N | E18B_T | S9B_A  | 3.2E-07 | 2.6E-06 | 1.497E-06 | 6.418E-07 |
| 4232 | Y10B_A | I20B_N | S5B_A  | G1B_A  | 8.3E-07 | 2.5E-06 | 1.498E-06 | 4.517E-07 |
| 4233 | G13B_A | K17B_A | F19B_Q | L23B_Q | 7.9E-07 | 2.3E-06 | 1.498E-06 | 4.918E-07 |
| 4234 | Y10B_A | V7B_A  | I20B_N | S5B_A  | 9.8E-07 | 2.2E-06 | 1.498E-06 | 3.293E-07 |
| 4235 | G13B_A | L11B_A | L23B_Q | G1B_A  | 7.7E-07 | 2.1E-06 | 1.499E-06 | 3.512E-07 |
| 4236 | Y10B_A | L11B_A | F19B_W | V24B_T | 7.9E-07 | 2.0E-06 | 1.499E-06 | 3.872E-07 |
| 4237 | Y10B_A | E18B_T | T4B_A  | V24B_Q | 8.4E-07 | 2.4E-06 | 1.500E-06 | 4.422E-07 |
| 4238 | S8B_A  | D6B_A  | F19B_Q | S9B_A  | 5.8E-07 | 2.7E-06 | 1.500E-06 | 6.013E-07 |
| 4239 | G13B_A | S5B_A  | F19B_Q | K17B_S | 6.7E-07 | 2.7E-06 | 1.503E-06 | 5.055E-07 |
| 4240 | Y10B_A | I20B_N | L11B_A | S5B_A  | 7.8E-07 | 2.5E-06 | 1.503E-06 | 3.741E-07 |
| 4241 | G13B_A | Y10B_A | E18B_T | L23B_R | 7.9E-07 | 2.6E-06 | 1.505E-06 | 4.898E-07 |
| 4242 | G13B_A | S5B_A  | S9B_A  | L23B_R | 1.0E-06 | 2.4E-06 | 1.505E-06 | 4.442E-07 |
| 4243 | S8B_A  | D6B_A  | I20B_T | T4B_A  | 7.9E-07 | 2.3E-06 | 1.505E-06 | 3.375E-07 |
| 4244 | G13B_A | L11B_A | E18B_A | V24B_Q | 7.4E-07 | 3.5E-06 | 1.506E-06 | 5.920E-07 |
| 4245 | Y10B_A | D6B_A  | G13B_W | L23B_Q | 8.6E-07 | 2.3E-06 | 1.507E-06 | 4.619E-07 |
| 4246 | Y10B_A | S8B_A  | E18B_T | V24B_Q | 8.4E-07 | 2.6E-06 | 1.507E-06 | 5.420E-07 |
| 4247 | G13B_A | F3B_A  | S9B_A  | K17B_S | 7.4E-07 | 2.1E-06 | 1.507E-06 | 4.031E-07 |
| 4248 | Y10B_A | S8B_A  | V7B_A  | I20B_S | 8.7E-07 | 2.0E-06 | 1.508E-06 | 3.040E-07 |
| 4249 | G13B_A | I20B_Q | T4B_A  | Q14B_A | 6.8E-07 | 2.5E-06 | 1.508E-06 | 5.656E-07 |
| 4250 | G13B_A | F3B_A  | V24B_Q | G1B_A  | 8.2E-07 | 2.8E-06 | 1.508E-06 | 5.061E-07 |
| 4251 | Y10B_A | F3B_A  | I20B_T | T4B_A  | 9.3E-07 | 2.5E-06 | 1.508E-06 | 4.602E-07 |
| 4252 | G13B_A | E18B_T | T4B_A  | L23B_Q | 7.3E-07 | 2.4E-06 | 1.508E-06 | 4.722E-07 |
| 4253 | G13B_A | T4B_A  | V24B_T | E12B_A | 9.8E-07 | 2.3E-06 | 1.508E-06 | 3.228E-07 |
| 4254 | S8B_A  | V7B_A  | I20B_N | T2B_A  | 9.8E-07 | 1.9E-06 | 1.508E-06 | 3.350E-07 |
| 4255 | G13B_A | A16B_N | F19B_W | K17B_S | 4.8E-07 | 3.3E-06 | 1.508E-06 | 6.296E-07 |
| 4256 | Y10B_A | G1B_R  | F19B_Q | E12B_A | 6.1E-07 | 2.3E-06 | 1.508E-06 | 5.043E-07 |
| 4257 | Y10B_A | A16B_N | F19B_W | L23B_Q | 3.8E-07 | 3.3E-06 | 1.510E-06 | 7.846E-07 |
| 4258 | Y10B_A | S8B_A  | D6B_A  | I20B_T | 8.9E-07 | 2.7E-06 | 1.510E-06 | 4.298E-07 |
| 4259 | Y10B_A | F3B_A  | I20B_N | T2B_A  | 7.1E-07 | 2.0E-06 | 1.511E-06 | 3.632E-07 |
| 4260 | Y10B_A | D6B_A  | E12B_A | V24B_N | 7.3E-07 | 2.5E-06 | 1.511E-06 | 4.601E-07 |
| 4261 | G13B_A | V7B_A  | E18B_T | E12B_A | 8.5E-07 | 2.8E-06 | 1.512E-06 | 5.063E-07 |
| 4262 | S8B_A  | G13B_W | A16B_N | F19B_Q | 2.7E-07 | 4.0E-06 | 1.512E-06 | 8.876E-07 |
| 4263 | Y10B_A | V7B_A  | V24B_Q | E12B_A | 9.5E-07 | 2.7E-06 | 1.512E-06 | 4.401E-07 |

|      |        |        |        |        |         |         |           |           |
|------|--------|--------|--------|--------|---------|---------|-----------|-----------|
| 4264 | Y10B_A | L11B_A | L23B_R | E12B_A | 7.6E-07 | 2.3E-06 | 1.513E-06 | 4.183E-07 |
| 4265 | G13B_A | V7B_A  | L23B_R | G1B_A  | 9.5E-07 | 2.9E-06 | 1.513E-06 | 4.544E-07 |
| 4266 | Y10B_A | D6B_A  | I20B_T | Q14B_A | 8.9E-07 | 2.3E-06 | 1.513E-06 | 4.067E-07 |
| 4267 | Y10B_A | I20B_T | L11B_A | S5B_A  | 7.9E-07 | 2.5E-06 | 1.513E-06 | 4.388E-07 |
| 4268 | Y10B_A | L23B_R | F19B_A | E12B_A | 7.6E-07 | 3.2E-06 | 1.513E-06 | 5.234E-07 |
| 4269 | G13B_A | V7B_A  | A16B_N | V24B_T | 3.0E-07 | 2.5E-06 | 1.513E-06 | 6.765E-07 |
| 4270 | S8B_A  | G13B_W | V24B_Q | Q14B_A | 5.9E-07 | 2.3E-06 | 1.514E-06 | 3.800E-07 |
| 4271 | Y10B_A | L11B_A | F19B_Q | K17B_S | 7.5E-07 | 2.7E-06 | 1.514E-06 | 6.093E-07 |
| 4272 | Y10B_A | I20B_S | K17B_A | F19B_A | 8.0E-07 | 2.3E-06 | 1.515E-06 | 3.996E-07 |
| 4273 | G13B_A | L11B_A | F19B_A | V24B_N | 1.0E-06 | 2.3E-06 | 1.515E-06 | 3.703E-07 |
| 4274 | Y10B_A | E18B_T | L11B_A | L23B_R | 9.7E-07 | 2.4E-06 | 1.516E-06 | 4.296E-07 |
| 4275 | G13B_A | A16B_N | L23B_Q | F19B_A | 4.9E-07 | 5.3E-06 | 1.517E-06 | 1.107E-06 |
| 4276 | Y10B_A | T4B_A  | F19B_Q | V24B_T | 6.3E-07 | 2.3E-06 | 1.519E-06 | 4.587E-07 |
| 4277 | G13B_A | A16B_N | E18B_A | L23B_Q | 3.0E-07 | 3.4E-06 | 1.519E-06 | 7.743E-07 |
| 4278 | Y10B_A | L23B_R | K17B_S | T2B_A  | 9.3E-07 | 2.3E-06 | 1.519E-06 | 4.341E-07 |
| 4279 | Y10B_A | G13B_W | L23B_R | F19B_A | 9.8E-07 | 2.6E-06 | 1.519E-06 | 4.201E-07 |
| 4280 | Y10B_A | G13B_W | V7B_A  | L23B_Q | 6.7E-07 | 2.9E-06 | 1.520E-06 | 6.730E-07 |
| 4281 | S8B_A  | D6B_A  | I20B_S | T4B_A  | 8.9E-07 | 4.2E-06 | 1.520E-06 | 7.436E-07 |
| 4282 | G13B_A | F3B_A  | S9B_A  | E12B_A | 1.2E-06 | 2.2E-06 | 1.520E-06 | 3.458E-07 |
| 4283 | G13B_A | D6B_A  | E18B_T | S9B_A  | 8.4E-07 | 2.8E-06 | 1.521E-06 | 5.069E-07 |
| 4284 | Y10B_A | L23B_Q | V24B_T | Q14B_A | 7.6E-07 | 4.4E-06 | 1.521E-06 | 7.601E-07 |
| 4285 | Y10B_A | T4B_A  | S9B_A  | V24B_N | 8.4E-07 | 2.4E-06 | 1.521E-06 | 4.814E-07 |
| 4286 | Y10B_A | G13B_W | K17B_S | G1B_A  | 9.1E-07 | 2.3E-06 | 1.522E-06 | 4.277E-07 |
| 4287 | G13B_A | S8B_A  | E12B_A | V24B_N | 8.0E-07 | 2.6E-06 | 1.522E-06 | 4.431E-07 |
| 4288 | G13B_A | F19B_A | V24B_N | G1B_A  | 8.5E-07 | 2.7E-06 | 1.522E-06 | 4.390E-07 |
| 4289 | G13B_A | Y10B_A | I20B_N | K17B_A | 9.3E-07 | 2.9E-06 | 1.523E-06 | 5.305E-07 |
| 4290 | G13B_A | V7B_A  | V24B_T | G1B_A  | 8.6E-07 | 2.4E-06 | 1.523E-06 | 3.762E-07 |
| 4291 | G13B_A | E18B_T | S5B_A  | L23B_R | 7.3E-07 | 3.9E-06 | 1.523E-06 | 7.065E-07 |
| 4292 | Y10B_A | E18B_A | F19B_Q | L23B_R | 7.6E-07 | 2.3E-06 | 1.524E-06 | 3.915E-07 |
| 4293 | G13B_A | D6B_A  | G1B_R  | V24B_T | 1.2E-06 | 2.1E-06 | 1.525E-06 | 2.789E-07 |
| 4294 | G13B_A | F3B_A  | L11B_A | V24B_T | 1.0E-06 | 2.4E-06 | 1.525E-06 | 3.323E-07 |
| 4295 | G13B_A | E18B_T | F19B_W | G1B_A  | 1.1E-06 | 2.6E-06 | 1.525E-06 | 3.905E-07 |
| 4296 | S8B_A  | G13B_W | Q14B_A | V24B_N | 1.1E-06 | 2.5E-06 | 1.525E-06 | 3.985E-07 |
| 4297 | Y10B_A | L11B_A | E12B_A | V24B_N | 8.0E-07 | 2.2E-06 | 1.526E-06 | 4.237E-07 |
| 4298 | G13B_A | F3B_A  | G1B_R  | L23B_R | 7.6E-07 | 2.7E-06 | 1.526E-06 | 4.661E-07 |
| 4299 | Y10B_A | E18B_T | G1B_R  | F19B_Q | 7.0E-07 | 3.4E-06 | 1.527E-06 | 7.505E-07 |
| 4300 | G13B_A | L11B_A | E18B_A | V24B_N | 7.8E-07 | 2.3E-06 | 1.529E-06 | 3.928E-07 |
| 4301 | G13B_A | A16B_N | L11B_A | L23B_R | 4.1E-07 | 2.4E-06 | 1.529E-06 | 5.760E-07 |
| 4302 | Y10B_A | A16B_N | E18B_T | L23B_Q | 6.1E-07 | 3.1E-06 | 1.529E-06 | 6.375E-07 |
| 4303 | G13B_A | T4B_A  | V24B_Q | E12B_A | 8.0E-07 | 2.8E-06 | 1.531E-06 | 4.812E-07 |
| 4304 | Y10B_A | D6B_A  | F19B_Q | K17B_S | 6.2E-07 | 2.7E-06 | 1.532E-06 | 6.440E-07 |
| 4305 | Y10B_A | F3B_A  | V24B_Q | E12B_A | 9.5E-07 | 2.1E-06 | 1.532E-06 | 2.408E-07 |
| 4306 | Y10B_A | S8B_A  | A16B_N | I20B_T | 7.1E-07 | 2.5E-06 | 1.532E-06 | 5.224E-07 |
| 4307 | Y10B_A | G13B_W | L11B_A | L23B_Q | 7.7E-07 | 2.9E-06 | 1.532E-06 | 5.114E-07 |
| 4308 | Y10B_A | D6B_A  | F19B_W | V24B_N | 7.8E-07 | 2.5E-06 | 1.533E-06 | 4.156E-07 |
| 4309 | Y10B_A | I20B_Q | Q14B_A | T2B_A  | 7.6E-07 | 2.6E-06 | 1.533E-06 | 4.727E-07 |
| 4310 | Y10B_A | E18B_T | F19B_Q | G1B_A  | 6.6E-07 | 4.3E-06 | 1.534E-06 | 8.033E-07 |
| 4311 | Y10B_A | G13B_W | F19B_Q | G1B_A  | 6.1E-07 | 4.7E-06 | 1.534E-06 | 8.430E-07 |
| 4312 | Y10B_A | D6B_A  | I20B_S | T4B_A  | 8.9E-07 | 2.7E-06 | 1.534E-06 | 4.166E-07 |
| 4313 | Y10B_A | S8B_A  | F3B_A  | I20B_N | 9.7E-07 | 2.2E-06 | 1.536E-06 | 3.682E-07 |
| 4314 | G13B_A | L23B_Q | T2B_A  | E12B_A | 7.6E-07 | 2.8E-06 | 1.536E-06 | 5.868E-07 |
| 4315 | G13B_A | E18B_T | K17B_A | V24B_T | 7.5E-07 | 3.3E-06 | 1.537E-06 | 6.083E-07 |

|      |        |        |        |        |         |         |           |           |
|------|--------|--------|--------|--------|---------|---------|-----------|-----------|
| 4316 | Y10B_A | S5B_A  | S9B_A  | V24B_N | 8.8E-07 | 2.3E-06 | 1.537E-06 | 3.885E-07 |
| 4317 | Y10B_A | K17B_A | L23B_Q | V24B_N | 8.9E-07 | 2.3E-06 | 1.538E-06 | 3.990E-07 |
| 4318 | G13B_A | V7B_A  | F19B_W | S9B_A  | 7.3E-07 | 2.9E-06 | 1.538E-06 | 5.820E-07 |
| 4319 | Y10B_A | K17B_S | Q14B_A | V24B_N | 6.5E-07 | 3.1E-06 | 1.539E-06 | 6.057E-07 |
| 4320 | G13B_A | D6B_A  | L11B_A | V24B_N | 9.2E-07 | 2.4E-06 | 1.539E-06 | 3.647E-07 |
| 4321 | G13B_A | E18B_T | V24B_T | Q14B_A | 7.8E-07 | 3.5E-06 | 1.539E-06 | 6.008E-07 |
| 4322 | Y10B_A | F3B_A  | I20B_S | T4B_A  | 1.0E-06 | 2.2E-06 | 1.540E-06 | 3.218E-07 |
| 4323 | G13B_A | S8B_A  | V24B_Q | E12B_A | 1.1E-06 | 2.2E-06 | 1.540E-06 | 3.218E-07 |
| 4324 | Y10B_A | G13B_W | G1B_R  | L23B_R | 1.0E-06 | 2.3E-06 | 1.540E-06 | 3.283E-07 |
| 4325 | G13B_A | A16B_N | L11B_A | V24B_Q | 3.1E-07 | 2.9E-06 | 1.541E-06 | 6.724E-07 |
| 4326 | G13B_A | A16B_N | I20B_Q | K17B_A | 2.9E-07 | 2.4E-06 | 1.541E-06 | 5.452E-07 |
| 4327 | G13B_A | V24B_T | T2B_A  | E12B_A | 6.6E-07 | 3.2E-06 | 1.541E-06 | 6.057E-07 |
| 4328 | Y10B_A | E18B_A | F19B_Q | K17B_S | 7.2E-07 | 4.0E-06 | 1.541E-06 | 7.607E-07 |
| 4329 | G13B_A | E18B_A | F19B_Q | E12B_A | 6.5E-07 | 4.2E-06 | 1.541E-06 | 7.240E-07 |
| 4330 | G13B_A | V7B_A  | E18B_A | V24B_N | 7.8E-07 | 2.1E-06 | 1.542E-06 | 3.528E-07 |
| 4331 | G13B_A | V7B_A  | F19B_A | V24B_N | 9.6E-07 | 2.4E-06 | 1.543E-06 | 3.124E-07 |
| 4332 | G13B_A | A16B_N | G1B_R  | F19B_Q | 4.0E-07 | 3.3E-06 | 1.544E-06 | 8.271E-07 |
| 4333 | Y10B_A | S8B_A  | D6B_A  | I20B_N | 9.0E-07 | 2.1E-06 | 1.545E-06 | 3.873E-07 |
| 4334 | Y10B_A | G13B_W | E18B_A | L23B_R | 7.1E-07 | 3.2E-06 | 1.545E-06 | 5.960E-07 |
| 4335 | G13B_A | L11B_A | F19B_A | V24B_T | 1.0E-06 | 2.2E-06 | 1.545E-06 | 3.486E-07 |
| 4336 | Y10B_A | I20B_T | G1B_R  | K17B_A | 1.0E-06 | 2.0E-06 | 1.545E-06 | 2.819E-07 |
| 4337 | Y10B_A | S5B_A  | K17B_S | V24B_N | 7.6E-07 | 3.0E-06 | 1.546E-06 | 5.601E-07 |
| 4338 | Y10B_A | I20B_T | E18B_A | S5B_A  | 9.0E-07 | 2.1E-06 | 1.547E-06 | 3.479E-07 |
| 4339 | G13B_A | Y10B_A | L23B_R | E12B_A | 7.6E-07 | 2.6E-06 | 1.548E-06 | 4.307E-07 |
| 4340 | Y10B_A | V7B_A  | F19B_W | V24B_Q | 5.0E-07 | 2.3E-06 | 1.548E-06 | 4.789E-07 |
| 4341 | G13B_A | L11B_A | G1B_R  | K17B_S | 7.7E-07 | 2.6E-06 | 1.549E-06 | 4.398E-07 |
| 4342 | S8B_A  | D6B_A  | S9B_A  | L23B_R | 1.0E-06 | 2.2E-06 | 1.550E-06 | 3.561E-07 |
| 4343 | G13B_A | G1B_R  | L23B_R | F19B_A | 8.5E-07 | 2.8E-06 | 1.553E-06 | 4.564E-07 |
| 4344 | G13B_A | A16B_N | E18B_A | L23B_R | 3.6E-07 | 4.3E-06 | 1.553E-06 | 1.108E-06 |
| 4345 | G13B_A | E18B_T | L23B_Q | T2B_A  | 6.8E-07 | 3.0E-06 | 1.554E-06 | 5.737E-07 |
| 4346 | G13B_A | E18B_A | K17B_S | E12B_A | 9.1E-07 | 2.4E-06 | 1.555E-06 | 3.596E-07 |
| 4347 | G13B_A | V7B_A  | K17B_S | E12B_A | 9.0E-07 | 2.7E-06 | 1.555E-06 | 4.957E-07 |
| 4348 | G13B_A | T4B_A  | E12B_A | V24B_N | 5.8E-07 | 5.4E-06 | 1.555E-06 | 9.694E-07 |
| 4349 | G13B_A | E18B_A | V24B_Q | G1B_A  | 7.8E-07 | 2.2E-06 | 1.555E-06 | 4.433E-07 |
| 4350 | S8B_A  | D6B_A  | I20B_N | T4B_A  | 9.3E-07 | 2.7E-06 | 1.556E-06 | 4.237E-07 |
| 4351 | G13B_A | I20B_Q | K17B_A | Q14B_A | 7.6E-07 | 3.4E-06 | 1.556E-06 | 7.024E-07 |
| 4352 | G13B_A | V7B_A  | L23B_Q | G1B_A  | 9.5E-07 | 2.9E-06 | 1.557E-06 | 4.761E-07 |
| 4353 | S8B_A  | G13B_W | E18B_A | V24B_T | 8.8E-07 | 2.5E-06 | 1.559E-06 | 5.329E-07 |
| 4354 | G13B_A | L11B_A | S9B_A  | E12B_A | 9.9E-07 | 2.3E-06 | 1.559E-06 | 3.933E-07 |
| 4355 | Y10B_A | I20B_S | E18B_A | S5B_A  | 8.9E-07 | 2.6E-06 | 1.560E-06 | 4.531E-07 |
| 4356 | G13B_A | F3B_A  | F19B_W | S9B_A  | 8.5E-07 | 2.7E-06 | 1.560E-06 | 4.847E-07 |
| 4357 | G13B_A | E18B_T | L11B_A | S9B_A  | 9.2E-07 | 2.1E-06 | 1.561E-06 | 3.799E-07 |
| 4358 | Y10B_A | S8B_A  | F19B_Q | K17B_S | 8.6E-07 | 2.6E-06 | 1.561E-06 | 4.666E-07 |
| 4359 | G13B_A | A16B_N | S9B_A  | E12B_A | 3.5E-07 | 2.9E-06 | 1.562E-06 | 6.850E-07 |
| 4360 | Y10B_A | E18B_T | F19B_A | V24B_T | 9.3E-07 | 2.5E-06 | 1.562E-06 | 4.442E-07 |
| 4361 | Y10B_A | S8B_A  | S9B_A  | V24B_Q | 9.8E-07 | 2.2E-06 | 1.563E-06 | 3.707E-07 |
| 4362 | S8B_A  | G13B_W | L11B_A | F19B_Q | 5.3E-07 | 2.9E-06 | 1.563E-06 | 6.155E-07 |
| 4363 | G13B_A | D6B_A  | I20B_S | K17B_A | 6.8E-07 | 2.7E-06 | 1.564E-06 | 5.722E-07 |
| 4364 | S8B_A  | D6B_A  | I20B_S | Q14B_A | 8.9E-07 | 2.5E-06 | 1.564E-06 | 4.980E-07 |
| 4365 | G13B_A | Y10B_A | F19B_Q | S9B_A  | 9.8E-07 | 3.5E-06 | 1.564E-06 | 5.771E-07 |
| 4366 | S8B_A  | G13B_W | K17B_S | F19B_A | 1.1E-06 | 2.4E-06 | 1.565E-06 | 3.977E-07 |
| 4367 | G13B_A | D6B_A  | F3B_A  | L23B_Q | 9.9E-07 | 2.3E-06 | 1.565E-06 | 3.823E-07 |

|      |        |        |        |        |         |         |           |           |
|------|--------|--------|--------|--------|---------|---------|-----------|-----------|
| 4368 | G13B_A | E18B_T | L11B_A | E12B_A | 1.1E-06 | 2.0E-06 | 1.565E-06 | 2.720E-07 |
| 4369 | Y10B_A | F19B_W | V24B_T | G1B_A  | 8.2E-07 | 2.4E-06 | 1.566E-06 | 3.595E-07 |
| 4370 | Y10B_A | S9B_A  | V24B_Q | Q14B_A | 7.1E-07 | 2.7E-06 | 1.569E-06 | 4.122E-07 |
| 4371 | G13B_A | I20B_Q | S5B_A  | K17B_A | 8.9E-07 | 2.9E-06 | 1.569E-06 | 5.892E-07 |
| 4372 | Y10B_A | D6B_A  | I20B_N | S5B_A  | 9.7E-07 | 2.3E-06 | 1.569E-06 | 4.302E-07 |
| 4373 | Y10B_A | E18B_T | F19B_W | E12B_A | 8.3E-07 | 2.7E-06 | 1.570E-06 | 5.885E-07 |
| 4374 | S8B_A  | G13B_W | E18B_A | L23B_R | 1.0E-06 | 2.3E-06 | 1.570E-06 | 4.485E-07 |
| 4375 | Y10B_A | S8B_A  | I20B_S | E18B_A | 9.0E-07 | 2.3E-06 | 1.570E-06 | 3.511E-07 |
| 4376 | G13B_A | D6B_A  | A16B_N | V24B_N | 8.0E-07 | 2.3E-06 | 1.570E-06 | 3.526E-07 |
| 4377 | G13B_A | D6B_A  | V7B_A  | V24B_Q | 9.2E-07 | 2.6E-06 | 1.571E-06 | 4.755E-07 |
| 4378 | G13B_A | E18B_T | L23B_R | Q14B_A | 7.9E-07 | 2.7E-06 | 1.571E-06 | 5.405E-07 |
| 4379 | Y10B_A | T4B_A  | L23B_R | K17B_S | 9.5E-07 | 3.1E-06 | 1.572E-06 | 5.844E-07 |
| 4380 | G13B_A | F19B_W | V24B_Q | T2B_A  | 5.0E-07 | 2.4E-06 | 1.572E-06 | 4.706E-07 |
| 4381 | Y10B_A | S8B_A  | I20B_Q | T2B_A  | 3.6E-07 | 2.4E-06 | 1.573E-06 | 5.347E-07 |
| 4382 | G13B_A | A16B_N | E18B_T | E12B_A | 4.3E-07 | 2.9E-06 | 1.573E-06 | 7.138E-07 |
| 4383 | G13B_A | D6B_A  | F3B_A  | F19B_Q | 9.9E-07 | 2.6E-06 | 1.574E-06 | 4.310E-07 |
| 4384 | Y10B_A | K17B_S | T2B_A  | V24B_N | 6.3E-07 | 3.0E-06 | 1.574E-06 | 6.315E-07 |
| 4385 | G13B_A | S8B_A  | A16B_N | L23B_R | 5.0E-07 | 4.5E-06 | 1.574E-06 | 1.003E-06 |
| 4386 | G13B_A | S8B_A  | L23B_Q | E12B_A | 3.5E-07 | 2.5E-06 | 1.574E-06 | 5.548E-07 |
| 4387 | Y10B_A | F19B_Q | L23B_Q | Q14B_A | 3.4E-07 | 2.9E-06 | 1.575E-06 | 6.100E-07 |
| 4388 | G13B_A | S8B_A  | I20B_Q | K17B_A | 6.5E-07 | 2.4E-06 | 1.575E-06 | 5.666E-07 |
| 4389 | G13B_A | S8B_A  | F19B_W | L23B_R | 1.1E-06 | 3.1E-06 | 1.575E-06 | 5.600E-07 |
| 4390 | G13B_A | A16B_N | F19B_A | V24B_Q | 5.7E-07 | 2.7E-06 | 1.575E-06 | 6.174E-07 |
| 4391 | G13B_A | F3B_A  | L23B_R | F19B_A | 1.3E-06 | 2.5E-06 | 1.575E-06 | 2.807E-07 |
| 4392 | Y10B_A | E18B_T | Q14B_A | V24B_N | 9.8E-07 | 3.2E-06 | 1.577E-06 | 5.881E-07 |
| 4393 | G13B_A | F3B_A  | G1B_R  | V24B_T | 9.8E-07 | 3.0E-06 | 1.578E-06 | 5.915E-07 |
| 4394 | S8B_A  | V7B_A  | I20B_N | K17B_A | 7.3E-07 | 2.4E-06 | 1.578E-06 | 4.746E-07 |
| 4395 | G13B_A | V7B_A  | A16B_N | L23B_Q | 4.6E-07 | 3.7E-06 | 1.578E-06 | 9.235E-07 |
| 4396 | Y10B_A | K17B_S | V24B_Q | Q14B_A | 9.8E-07 | 3.3E-06 | 1.579E-06 | 4.961E-07 |
| 4397 | G13B_A | V7B_A  | A16B_N | L23B_R | 3.9E-07 | 2.6E-06 | 1.581E-06 | 6.557E-07 |
| 4398 | G13B_A | I20B_N | K17B_A | T2B_A  | 8.3E-07 | 2.9E-06 | 1.581E-06 | 4.634E-07 |
| 4399 | Y10B_A | L11B_A | F19B_Q | S9B_A  | 7.1E-07 | 2.9E-06 | 1.581E-06 | 6.013E-07 |
| 4400 | G13B_A | A16B_N | V24B_T | G1B_A  | 7.7E-07 | 2.8E-06 | 1.582E-06 | 5.229E-07 |
| 4401 | G13B_A | G1B_R  | F19B_A | V24B_N | 6.8E-07 | 3.2E-06 | 1.582E-06 | 7.193E-07 |
| 4402 | Y10B_A | S8B_A  | I20B_T | T2B_A  | 9.3E-07 | 3.0E-06 | 1.582E-06 | 4.884E-07 |
| 4403 | G13B_A | A16B_N | I20B_S | K17B_A | 2.9E-07 | 3.3E-06 | 1.582E-06 | 8.237E-07 |
| 4404 | S8B_A  | D6B_A  | I20B_N | Q14B_A | 7.6E-07 | 2.7E-06 | 1.582E-06 | 4.666E-07 |
| 4405 | G13B_A | E18B_A | F19B_A | V24B_Q | 9.3E-07 | 2.5E-06 | 1.582E-06 | 3.412E-07 |
| 4406 | S8B_A  | G13B_W | A16B_N | V24B_T | 4.4E-07 | 3.8E-06 | 1.583E-06 | 8.120E-07 |
| 4407 | Y10B_A | E18B_A | L23B_Q | E12B_A | 9.2E-07 | 2.6E-06 | 1.584E-06 | 4.362E-07 |
| 4408 | G13B_A | D6B_A  | F19B_A | V24B_N | 9.8E-07 | 2.3E-06 | 1.584E-06 | 4.334E-07 |
| 4409 | G13B_A | I20B_Q | K17B_A | T2B_A  | 1.1E-06 | 2.4E-06 | 1.585E-06 | 4.056E-07 |
| 4410 | Y10B_A | D6B_A  | I20B_Q | Q14B_A | 8.0E-07 | 2.3E-06 | 1.585E-06 | 4.668E-07 |
| 4411 | Y10B_A | G13B_W | F3B_A  | S9B_A  | 1.1E-06 | 2.4E-06 | 1.585E-06 | 3.856E-07 |
| 4412 | S8B_A  | G13B_W | L11B_A | K17B_S | 1.1E-06 | 2.5E-06 | 1.585E-06 | 3.468E-07 |
| 4413 | G13B_A | I20B_S | T4B_A  | T2B_A  | 7.1E-07 | 2.5E-06 | 1.585E-06 | 4.695E-07 |
| 4414 | G13B_A | V7B_A  | L11B_A | V24B_Q | 1.0E-06 | 2.3E-06 | 1.585E-06 | 3.543E-07 |
| 4415 | Y10B_A | S9B_A  | Q14B_A | V24B_N | 8.8E-07 | 2.6E-06 | 1.586E-06 | 5.240E-07 |
| 4416 | Y10B_A | F3B_A  | S9B_A  | K17B_S | 9.4E-07 | 2.4E-06 | 1.587E-06 | 3.995E-07 |
| 4417 | Y10B_A | D6B_A  | A16B_N | L23B_R | 4.0E-07 | 2.7E-06 | 1.587E-06 | 8.024E-07 |
| 4418 | G13B_A | F3B_A  | F19B_A | V24B_T | 9.7E-07 | 2.8E-06 | 1.588E-06 | 4.960E-07 |
| 4419 | G13B_A | F3B_A  | E18B_T | F19B_W | 6.2E-07 | 2.6E-06 | 1.590E-06 | 6.337E-07 |

|      |        |        |        |        |         |         |           |           |
|------|--------|--------|--------|--------|---------|---------|-----------|-----------|
| 4420 | G13B_A | K17B_A | S9B_A  | L23B_R | 1.1E-06 | 2.7E-06 | 1.590E-06 | 3.684E-07 |
| 4421 | G13B_A | I20B_T | K17B_A | Q14B_A | 6.7E-07 | 2.9E-06 | 1.590E-06 | 5.115E-07 |
| 4422 | G13B_A | V7B_A  | F3B_A  | V24B_T | 1.1E-06 | 2.4E-06 | 1.590E-06 | 3.194E-07 |
| 4423 | G13B_A | F3B_A  | L11B_A | V24B_Q | 7.3E-07 | 3.2E-06 | 1.591E-06 | 6.450E-07 |
| 4424 | Y10B_A | K17B_A | L23B_Q | V24B_Q | 7.3E-07 | 2.4E-06 | 1.591E-06 | 5.786E-07 |
| 4425 | Y10B_A | L11B_A | V24B_T | E12B_A | 7.2E-07 | 2.8E-06 | 1.591E-06 | 4.106E-07 |
| 4426 | G13B_A | D6B_A  | L11B_A | V24B_Q | 8.1E-07 | 2.4E-06 | 1.591E-06 | 3.997E-07 |
| 4427 | G13B_A | D6B_A  | F19B_A | V24B_Q | 7.5E-07 | 2.5E-06 | 1.592E-06 | 4.500E-07 |
| 4428 | G13B_A | E18B_A | F19B_W | K17B_S | 5.2E-07 | 2.9E-06 | 1.592E-06 | 6.163E-07 |
| 4429 | G13B_A | Y10B_A | I20B_Q | K17B_A | 7.6E-07 | 2.4E-06 | 1.593E-06 | 4.481E-07 |
| 4430 | Y10B_A | G13B_W | V24B_Q | T2B_A  | 8.5E-07 | 2.8E-06 | 1.593E-06 | 5.156E-07 |
| 4431 | Y10B_A | D6B_A  | I20B_N | T2B_A  | 6.1E-07 | 2.9E-06 | 1.593E-06 | 5.916E-07 |
| 4432 | S8B_A  | D6B_A  | G13B_W | L23B_R | 8.7E-07 | 2.7E-06 | 1.594E-06 | 4.572E-07 |
| 4433 | Y10B_A | I20B_T | E18B_A | Q14B_A | 6.0E-07 | 2.3E-06 | 1.595E-06 | 4.367E-07 |
| 4434 | Y10B_A | G1B_R  | F19B_A | V24B_N | 7.9E-07 | 2.3E-06 | 1.595E-06 | 3.883E-07 |
| 4435 | S8B_A  | D6B_A  | I20B_N | S5B_A  | 1.0E-06 | 2.3E-06 | 1.595E-06 | 3.591E-07 |
| 4436 | G13B_A | F3B_A  | L23B_R | G1B_A  | 9.2E-07 | 2.1E-06 | 1.596E-06 | 2.922E-07 |
| 4437 | Y10B_A | I20B_N | E18B_A | Q14B_A | 7.7E-07 | 2.5E-06 | 1.598E-06 | 5.323E-07 |
| 4438 | G13B_A | V7B_A  | F3B_A  | L23B_Q | 9.6E-07 | 2.9E-06 | 1.598E-06 | 4.751E-07 |
| 4439 | Y10B_A | S8B_A  | K17B_S | V24B_N | 6.9E-07 | 3.0E-06 | 1.599E-06 | 5.243E-07 |
| 4440 | G13B_A | T4B_A  | L23B_Q | E12B_A | 1.0E-06 | 4.0E-06 | 1.600E-06 | 6.959E-07 |
| 4441 | G13B_A | T4B_A  | S9B_A  | L23B_R | 1.1E-06 | 2.5E-06 | 1.600E-06 | 4.316E-07 |
| 4442 | Y10B_A | E18B_T | T2B_A  | V24B_N | 1.0E-06 | 2.3E-06 | 1.600E-06 | 3.509E-07 |
| 4443 | G13B_A | L11B_A | V24B_Q | G1B_A  | 6.2E-07 | 2.2E-06 | 1.601E-06 | 3.894E-07 |
| 4444 | G13B_A | A16B_N | F19B_W | S9B_A  | 3.5E-07 | 2.9E-06 | 1.604E-06 | 5.641E-07 |
| 4445 | G13B_A | F3B_A  | L11B_A | L23B_Q | 7.8E-07 | 2.9E-06 | 1.604E-06 | 4.669E-07 |
| 4446 | G13B_A | G1B_R  | L23B_Q | F19B_A | 9.7E-07 | 3.6E-06 | 1.604E-06 | 6.467E-07 |
| 4447 | Y10B_A | F19B_W | S9B_A  | E12B_A | 8.0E-07 | 2.7E-06 | 1.605E-06 | 4.559E-07 |
| 4448 | Y10B_A | V7B_A  | I20B_S | S5B_A  | 8.4E-07 | 2.3E-06 | 1.605E-06 | 4.367E-07 |
| 4449 | G13B_A | D6B_A  | S9B_A  | E12B_A | 1.0E-06 | 2.3E-06 | 1.605E-06 | 3.441E-07 |
| 4450 | G13B_A | V7B_A  | F3B_A  | L23B_R | 1.1E-06 | 2.4E-06 | 1.605E-06 | 3.993E-07 |
| 4451 | Y10B_A | F19B_Q | S9B_A  | G1B_A  | 8.7E-07 | 2.9E-06 | 1.605E-06 | 5.008E-07 |
| 4452 | G13B_A | A16B_N | E18B_A | V24B_Q | 3.8E-07 | 2.7E-06 | 1.606E-06 | 6.077E-07 |
| 4453 | G13B_A | A16B_N | E18B_A | V24B_T | 4.7E-07 | 3.4E-06 | 1.606E-06 | 7.117E-07 |
| 4454 | G13B_A | L23B_R | F19B_A | G1B_A  | 9.6E-07 | 2.5E-06 | 1.608E-06 | 4.566E-07 |
| 4455 | S8B_A  | G13B_W | F19B_W | E12B_A | 6.6E-07 | 2.5E-06 | 1.609E-06 | 5.609E-07 |
| 4456 | G13B_A | E18B_A | L23B_R | G1B_A  | 8.7E-07 | 2.7E-06 | 1.609E-06 | 4.473E-07 |
| 4457 | G13B_A | L11B_A | F19B_Q | E12B_A | 6.9E-07 | 3.0E-06 | 1.611E-06 | 5.990E-07 |
| 4458 | G13B_A | F3B_A  | A16B_N | V24B_N | 3.7E-07 | 2.9E-06 | 1.611E-06 | 5.777E-07 |
| 4459 | G13B_A | D6B_A  | L23B_R | G1B_A  | 8.3E-07 | 2.6E-06 | 1.612E-06 | 4.513E-07 |
| 4460 | S8B_A  | D6B_A  | F19B_Q | L23B_R | 7.5E-07 | 2.8E-06 | 1.612E-06 | 5.323E-07 |
| 4461 | Y10B_A | D6B_A  | V24B_T | E12B_A | 9.0E-07 | 3.6E-06 | 1.613E-06 | 5.546E-07 |
| 4462 | S8B_A  | D6B_A  | V24B_Q | E12B_A | 7.3E-07 | 3.3E-06 | 1.614E-06 | 7.237E-07 |
| 4463 | Y10B_A | A16B_N | V24B_T | E12B_A | 4.8E-07 | 3.0E-06 | 1.615E-06 | 5.691E-07 |
| 4464 | G13B_A | L11B_A | K17B_S | E12B_A | 9.0E-07 | 3.7E-06 | 1.615E-06 | 6.877E-07 |
| 4465 | G13B_A | I20B_Q | K17B_A | T4B_A  | 7.9E-07 | 2.9E-06 | 1.616E-06 | 6.052E-07 |
| 4466 | Y10B_A | I20B_S | K17B_A | G1B_A  | 9.3E-07 | 2.4E-06 | 1.616E-06 | 4.132E-07 |
| 4467 | G13B_A | L11B_A | V24B_T | G1B_A  | 9.3E-07 | 2.2E-06 | 1.617E-06 | 3.542E-07 |
| 4468 | G13B_A | F19B_W | L23B_Q | T2B_A  | 7.4E-07 | 3.0E-06 | 1.617E-06 | 6.196E-07 |
| 4469 | Y10B_A | S8B_A  | D6B_A  | I20B_S | 8.9E-07 | 2.5E-06 | 1.618E-06 | 5.245E-07 |
| 4470 | Y10B_A | I20B_Q | S5B_A  | T2B_A  | 7.6E-07 | 2.9E-06 | 1.619E-06 | 5.280E-07 |
| 4471 | S8B_A  | D6B_A  | F19B_W | V24B_N | 1.2E-06 | 2.4E-06 | 1.620E-06 | 2.802E-07 |

|      |        |        |        |        |         |         |           |           |
|------|--------|--------|--------|--------|---------|---------|-----------|-----------|
| 4472 | Y10B_A | S8B_A  | I20B_Q | S5B_A  | 8.9E-07 | 2.9E-06 | 1.621E-06 | 6.234E-07 |
| 4473 | G13B_A | V7B_A  | A16B_N | S9B_A  | 5.5E-07 | 2.7E-06 | 1.621E-06 | 6.350E-07 |
| 4474 | G13B_A | D6B_A  | K17B_S | E12B_A | 6.4E-07 | 3.1E-06 | 1.622E-06 | 6.256E-07 |
| 4475 | Y10B_A | V7B_A  | E18B_T | K17B_S | 8.4E-07 | 3.0E-06 | 1.622E-06 | 5.374E-07 |
| 4476 | Y10B_A | V7B_A  | L23B_R | E12B_A | 8.5E-07 | 2.6E-06 | 1.623E-06 | 4.561E-07 |
| 4477 | Y10B_A | L23B_Q | K17B_S | T2B_A  | 9.6E-07 | 3.0E-06 | 1.623E-06 | 5.539E-07 |
| 4478 | G13B_A | D6B_A  | F19B_W | K17B_S | 6.6E-07 | 3.3E-06 | 1.624E-06 | 5.931E-07 |
| 4479 | Y10B_A | S8B_A  | S9B_A  | V24B_T | 8.8E-07 | 2.2E-06 | 1.624E-06 | 3.217E-07 |
| 4480 | G13B_A | D6B_A  | G1B_R  | F19B_Q | 6.8E-07 | 3.2E-06 | 1.624E-06 | 6.935E-07 |
| 4481 | Y10B_A | G13B_W | L11B_A | K17B_S | 1.2E-06 | 2.1E-06 | 1.625E-06 | 3.626E-07 |
| 4482 | S8B_A  | G13B_W | A16B_N | K17B_S | 3.7E-07 | 3.8E-06 | 1.626E-06 | 8.599E-07 |
| 4483 | S8B_A  | D6B_A  | I20B_Q | K17B_A | 9.6E-07 | 2.6E-06 | 1.626E-06 | 4.873E-07 |
| 4484 | G13B_A | D6B_A  | S9B_A  | K17B_S | 8.2E-07 | 2.6E-06 | 1.626E-06 | 4.344E-07 |
| 4485 | Y10B_A | G13B_W | E18B_A | F19B_Q | 7.7E-07 | 3.0E-06 | 1.627E-06 | 5.699E-07 |
| 4486 | G13B_A | F19B_W | L23B_R | T2B_A  | 7.8E-07 | 2.8E-06 | 1.627E-06 | 5.794E-07 |
| 4487 | S8B_A  | G13B_W | S5B_A  | V24B_N | 8.1E-07 | 2.5E-06 | 1.628E-06 | 4.059E-07 |
| 4488 | Y10B_A | A16B_N | E18B_T | F19B_Q | 3.2E-07 | 4.3E-06 | 1.628E-06 | 9.195E-07 |
| 4489 | Y10B_A | G1B_R  | L23B_Q | F19B_A | 7.9E-07 | 3.1E-06 | 1.629E-06 | 5.201E-07 |
| 4490 | Y10B_A | E18B_T | L11B_A | F19B_Q | 5.4E-07 | 3.1E-06 | 1.629E-06 | 7.236E-07 |
| 4491 | Y10B_A | K17B_A | L23B_R | V24B_N | 1.0E-06 | 2.7E-06 | 1.630E-06 | 4.131E-07 |
| 4492 | G13B_A | S8B_A  | F19B_Q | E12B_A | 7.6E-07 | 2.9E-06 | 1.631E-06 | 6.791E-07 |
| 4493 | G13B_A | Y10B_A | F19B_W | V24B_T | 7.6E-07 | 3.5E-06 | 1.631E-06 | 6.270E-07 |
| 4494 | Y10B_A | F19B_W | L23B_Q | Q14B_A | 8.4E-07 | 2.5E-06 | 1.631E-06 | 5.391E-07 |
| 4495 | G13B_A | E18B_T | K17B_A | V24B_Q | 7.1E-07 | 3.5E-06 | 1.633E-06 | 7.650E-07 |
| 4496 | G13B_A | F3B_A  | G1B_R  | F19B_Q | 4.0E-07 | 2.8E-06 | 1.633E-06 | 6.603E-07 |
| 4497 | G13B_A | V7B_A  | F19B_W | E12B_A | 6.6E-07 | 3.1E-06 | 1.633E-06 | 6.618E-07 |
| 4498 | G13B_A | D6B_A  | F3B_A  | V24B_Q | 9.6E-07 | 2.4E-06 | 1.633E-06 | 3.932E-07 |
| 4499 | Y10B_A | L11B_A | S9B_A  | K17B_S | 9.8E-07 | 2.2E-06 | 1.634E-06 | 4.124E-07 |
| 4500 | G13B_A | F3B_A  | E18B_T | S9B_A  | 9.9E-07 | 2.4E-06 | 1.634E-06 | 5.015E-07 |
| 4501 | Y10B_A | K17B_S | V24B_T | T2B_A  | 8.0E-07 | 3.0E-06 | 1.635E-06 | 5.432E-07 |
| 4502 | Y10B_A | A16B_N | F19B_W | V24B_N | 3.2E-07 | 5.3E-06 | 1.635E-06 | 1.076E-06 |
| 4503 | G13B_A | L11B_A | E18B_A | V24B_T | 1.1E-06 | 2.1E-06 | 1.635E-06 | 3.200E-07 |
| 4504 | Y10B_A | A16B_N | I20B_S | K17B_A | 4.5E-07 | 2.8E-06 | 1.636E-06 | 7.078E-07 |
| 4505 | Y10B_A | S5B_A  | S9B_A  | L23B_Q | 8.2E-07 | 2.8E-06 | 1.636E-06 | 4.188E-07 |
| 4506 | G13B_A | D6B_A  | V24B_T | G1B_A  | 6.4E-07 | 2.5E-06 | 1.637E-06 | 3.814E-07 |
| 4507 | Y10B_A | G13B_W | E18B_A | L23B_Q | 5.8E-07 | 3.2E-06 | 1.638E-06 | 5.398E-07 |
| 4508 | Y10B_A | F3B_A  | E18B_T | K17B_S | 7.6E-07 | 3.3E-06 | 1.638E-06 | 6.981E-07 |
| 4509 | G13B_A | D6B_A  | F19B_W | S9B_A  | 6.7E-07 | 2.9E-06 | 1.639E-06 | 5.441E-07 |
| 4510 | S8B_A  | G13B_W | E18B_T | G1B_R  | 1.1E-06 | 2.4E-06 | 1.640E-06 | 3.515E-07 |
| 4511 | G13B_A | V7B_A  | E18B_A | V24B_T | 1.0E-06 | 2.4E-06 | 1.640E-06 | 4.031E-07 |
| 4512 | S8B_A  | D6B_A  | F19B_W | L23B_Q | 9.4E-07 | 3.2E-06 | 1.642E-06 | 5.145E-07 |
| 4513 | G13B_A | D6B_A  | V7B_A  | V24B_N | 8.1E-07 | 2.5E-06 | 1.642E-06 | 4.297E-07 |
| 4514 | Y10B_A | E18B_A | F19B_W | L23B_Q | 8.7E-07 | 2.7E-06 | 1.643E-06 | 5.565E-07 |
| 4515 | Y10B_A | L23B_Q | E12B_A | G1B_A  | 8.6E-07 | 4.7E-06 | 1.643E-06 | 8.115E-07 |
| 4516 | G13B_A | L11B_A | E18B_A | L23B_R | 9.8E-07 | 2.6E-06 | 1.644E-06 | 4.632E-07 |
| 4517 | Y10B_A | L23B_R | E12B_A | G1B_A  | 6.8E-07 | 3.4E-06 | 1.644E-06 | 7.420E-07 |
| 4518 | Y10B_A | F19B_Q | E12B_A | G1B_A  | 1.0E-06 | 3.2E-06 | 1.645E-06 | 5.256E-07 |
| 4519 | G13B_A | V7B_A  | G1B_R  | F19B_Q | 5.5E-07 | 2.7E-06 | 1.646E-06 | 5.485E-07 |
| 4520 | Y10B_A | F19B_Q | L23B_R | T2B_A  | 7.4E-07 | 2.3E-06 | 1.646E-06 | 4.918E-07 |
| 4521 | G13B_A | Y10B_A | F19B_A | V24B_N | 9.6E-07 | 2.8E-06 | 1.646E-06 | 4.897E-07 |
| 4522 | G13B_A | K17B_A | S9B_A  | V24B_Q | 8.4E-07 | 2.3E-06 | 1.647E-06 | 3.359E-07 |
| 4523 | G13B_A | D6B_A  | V24B_N | G1B_A  | 8.8E-07 | 2.5E-06 | 1.647E-06 | 4.672E-07 |



|      |        |        |        |        |         |         |           |           |
|------|--------|--------|--------|--------|---------|---------|-----------|-----------|
| 4524 | Y10B_A | A16B_N | I20B_Q | K17B_A | 2.8E-07 | 3.2E-06 | 1.648E-06 | 7.804E-07 |
| 4525 | G13B_A | A16B_N | L11B_A | F19B_Q | 3.9E-07 | 4.6E-06 | 1.648E-06 | 1.026E-06 |
| 4526 | G13B_A | V7B_A  | L11B_A | L23B_Q | 4.5E-07 | 3.3E-06 | 1.648E-06 | 5.807E-07 |
| 4527 | Y10B_A | F19B_Q | K17B_S | Q14B_A | 7.6E-07 | 3.3E-06 | 1.648E-06 | 6.239E-07 |
| 4528 | Y10B_A | K17B_A | L23B_R | V24B_Q | 8.9E-07 | 2.4E-06 | 1.649E-06 | 4.155E-07 |
| 4529 | Y10B_A | D6B_A  | F19B_Q | L23B_R | 5.9E-07 | 2.9E-06 | 1.649E-06 | 5.612E-07 |
| 4530 | G13B_A | E18B_A | G1B_R  | V24B_T | 1.0E-06 | 2.8E-06 | 1.650E-06 | 4.490E-07 |
| 4531 | G13B_A | L11B_A | L23B_R | F19B_A | 1.1E-06 | 3.4E-06 | 1.650E-06 | 5.790E-07 |
| 4532 | G13B_A | V7B_A  | G1B_R  | L23B_R | 1.2E-06 | 2.4E-06 | 1.650E-06 | 3.317E-07 |
| 4533 | S8B_A  | D6B_A  | G13B_W | F19B_Q | 6.9E-07 | 3.6E-06 | 1.650E-06 | 7.011E-07 |
| 4534 | Y10B_A | F3B_A  | I20B_S | K17B_A | 1.1E-06 | 2.8E-06 | 1.650E-06 | 3.993E-07 |
| 4535 | G13B_A | E18B_A | V24B_T | G1B_A  | 1.1E-06 | 2.6E-06 | 1.650E-06 | 3.517E-07 |
| 4536 | Y10B_A | S5B_A  | F19B_Q | L23B_R | 6.7E-07 | 3.1E-06 | 1.651E-06 | 6.400E-07 |
| 4537 | Y10B_A | D6B_A  | E18B_T | L23B_R | 7.6E-07 | 3.4E-06 | 1.652E-06 | 7.332E-07 |
| 4538 | Y10B_A | F19B_Q | L23B_Q | T2B_A  | 8.0E-07 | 3.2E-06 | 1.653E-06 | 6.500E-07 |
| 4539 | G13B_A | A16B_N | V24B_N | G1B_A  | 4.4E-07 | 2.5E-06 | 1.653E-06 | 5.431E-07 |
| 4540 | Y10B_A | F3B_A  | I20B_N | K17B_A | 9.4E-07 | 2.6E-06 | 1.654E-06 | 4.491E-07 |
| 4541 | S8B_A  | D6B_A  | L23B_Q | E12B_A | 5.7E-07 | 2.5E-06 | 1.655E-06 | 5.450E-07 |
| 4542 | G13B_A | K17B_A | V24B_Q | E12B_A | 6.2E-07 | 2.8E-06 | 1.656E-06 | 4.728E-07 |
| 4543 | G13B_A | A16B_N | L11B_A | V24B_T | 6.0E-07 | 3.5E-06 | 1.656E-06 | 6.692E-07 |
| 4544 | Y10B_A | F3B_A  | A16B_N | V24B_Q | 4.1E-07 | 3.1E-06 | 1.658E-06 | 7.209E-07 |
| 4545 | Y10B_A | D6B_A  | L23B_R | E12B_A | 9.6E-07 | 3.6E-06 | 1.658E-06 | 5.401E-07 |
| 4546 | Y10B_A | I20B_Q | T4B_A  | T2B_A  | 7.9E-07 | 2.6E-06 | 1.659E-06 | 5.831E-07 |
| 4547 | Y10B_A | F19B_W | L23B_Q | T2B_A  | 6.4E-07 | 3.3E-06 | 1.659E-06 | 8.221E-07 |
| 4548 | Y10B_A | E18B_T | V24B_Q | T2B_A  | 9.9E-07 | 2.8E-06 | 1.659E-06 | 5.312E-07 |
| 4549 | Y10B_A | D6B_A  | G13B_W | K17B_S | 6.8E-07 | 2.8E-06 | 1.659E-06 | 5.432E-07 |
| 4550 | Y10B_A | G13B_W | A16B_N | F19B_Q | 2.5E-07 | 3.6E-06 | 1.659E-06 | 8.324E-07 |
| 4551 | G13B_A | F3B_A  | E18B_A | V24B_Q | 1.1E-06 | 2.1E-06 | 1.660E-06 | 3.085E-07 |
| 4552 | G13B_A | K17B_A | E12B_A | V24B_N | 9.0E-07 | 2.4E-06 | 1.660E-06 | 3.619E-07 |
| 4553 | Y10B_A | K17B_A | L23B_Q | V24B_T | 1.0E-06 | 2.9E-06 | 1.660E-06 | 4.358E-07 |
| 4554 | Y10B_A | G13B_W | V24B_Q | Q14B_A | 1.1E-06 | 3.1E-06 | 1.660E-06 | 5.529E-07 |
| 4555 | G13B_A | L23B_Q | Q14B_A | E12B_A | 8.6E-07 | 2.9E-06 | 1.661E-06 | 5.436E-07 |
| 4556 | S8B_A  | G13B_W | L23B_Q | T2B_A  | 9.8E-07 | 3.2E-06 | 1.662E-06 | 5.451E-07 |
| 4557 | G13B_A | Y10B_A | F19B_W | L23B_Q | 8.3E-07 | 3.0E-06 | 1.662E-06 | 6.051E-07 |
| 4558 | G13B_A | D6B_A  | V7B_A  | V24B_T | 9.7E-07 | 3.1E-06 | 1.663E-06 | 5.613E-07 |
| 4559 | S8B_A  | G13B_W | E18B_A | F19B_Q | 6.6E-07 | 3.4E-06 | 1.663E-06 | 6.731E-07 |
| 4560 | S8B_A  | G13B_W | A16B_N | S9B_A  | 4.9E-07 | 2.8E-06 | 1.663E-06 | 6.129E-07 |
| 4561 | Y10B_A | T4B_A  | L23B_Q | K17B_S | 1.6E-07 | 3.2E-06 | 1.664E-06 | 7.810E-07 |
| 4562 | S8B_A  | G13B_W | V24B_Q | T2B_A  | 6.6E-07 | 3.1E-06 | 1.665E-06 | 6.023E-07 |
| 4563 | G13B_A | F3B_A  | E18B_A | V24B_T | 1.1E-06 | 2.5E-06 | 1.665E-06 | 3.787E-07 |
| 4564 | Y10B_A | I20B_Q | S5B_A  | T4B_A  | 7.6E-07 | 2.6E-06 | 1.665E-06 | 5.267E-07 |
| 4565 | G13B_A | F3B_A  | F19B_A | V24B_Q | 8.3E-07 | 2.7E-06 | 1.666E-06 | 4.374E-07 |
| 4566 | G13B_A | Y10B_A | I20B_T | K17B_A | 9.4E-07 | 2.9E-06 | 1.666E-06 | 5.435E-07 |
| 4567 | G13B_A | I20B_T | K17B_A | T2B_A  | 9.4E-07 | 2.9E-06 | 1.667E-06 | 4.557E-07 |
| 4568 | G13B_A | S8B_A  | F19B_Q | S9B_A  | 8.3E-07 | 3.1E-06 | 1.667E-06 | 7.123E-07 |
| 4569 | Y10B_A | T4B_A  | S9B_A  | V24B_Q | 7.4E-07 | 3.2E-06 | 1.668E-06 | 6.194E-07 |
| 4570 | Y10B_A | S5B_A  | S9B_A  | V24B_Q | 8.8E-07 | 2.7E-06 | 1.669E-06 | 4.841E-07 |
| 4571 | G13B_A | L11B_A | F19B_Q | G1B_A  | 1.0E-06 | 2.6E-06 | 1.670E-06 | 4.402E-07 |
| 4572 | Y10B_A | L23B_R | K17B_S | Q14B_A | 8.1E-07 | 2.7E-06 | 1.670E-06 | 4.898E-07 |
| 4573 | S8B_A  | G13B_W | F3B_A  | E18B_T | 1.2E-06 | 2.8E-06 | 1.670E-06 | 4.041E-07 |
| 4574 | G13B_A | L11B_A | S5B_A  | V24B_Q | 8.1E-07 | 2.2E-06 | 1.670E-06 | 3.688E-07 |
| 4575 | G13B_A | D6B_A  | E18B_A | L23B_Q | 7.9E-07 | 2.9E-06 | 1.672E-06 | 6.423E-07 |

|      |        |        |        |        |         |         |           |           |
|------|--------|--------|--------|--------|---------|---------|-----------|-----------|
| 4576 | Y10B_A | G1B_R  | F19B_W | K17B_S | 8.2E-07 | 3.4E-06 | 1.673E-06 | 6.535E-07 |
| 4577 | Y10B_A | F19B_Q | K17B_S | T2B_A  | 8.9E-07 | 3.3E-06 | 1.674E-06 | 6.308E-07 |
| 4578 | G13B_A | F3B_A  | E18B_A | L23B_Q | 8.0E-07 | 2.7E-06 | 1.674E-06 | 5.451E-07 |
| 4579 | G13B_A | F19B_A | V24B_Q | G1B_A  | 1.2E-06 | 3.1E-06 | 1.675E-06 | 4.471E-07 |
| 4580 | Y10B_A | E18B_T | G1B_R  | S9B_A  | 1.0E-06 | 2.9E-06 | 1.675E-06 | 4.876E-07 |
| 4581 | Y10B_A | F3B_A  | F19B_W | V24B_T | 1.0E-06 | 2.7E-06 | 1.675E-06 | 5.067E-07 |
| 4582 | G13B_A | D6B_A  | G1B_R  | L23B_Q | 1.0E-06 | 2.4E-06 | 1.675E-06 | 3.210E-07 |
| 4583 | S8B_A  | G13B_W | G1B_R  | S9B_A  | 1.1E-06 | 3.0E-06 | 1.675E-06 | 4.399E-07 |
| 4584 | Y10B_A | L11B_A | L23B_Q | F19B_A | 1.1E-06 | 2.5E-06 | 1.675E-06 | 3.712E-07 |
| 4585 | S8B_A  | G13B_W | V7B_A  | F19B_Q | 8.5E-07 | 3.4E-06 | 1.677E-06 | 6.475E-07 |
| 4586 | Y10B_A | E18B_T | G1B_R  | K17B_S | 8.7E-07 | 2.5E-06 | 1.678E-06 | 5.171E-07 |
| 4587 | G13B_A | D6B_A  | F3B_A  | V24B_T | 9.8E-07 | 2.6E-06 | 1.679E-06 | 4.091E-07 |
| 4588 | Y10B_A | D6B_A  | G13B_W | L23B_R | 1.0E-06 | 2.5E-06 | 1.680E-06 | 4.099E-07 |
| 4589 | G13B_A | T4B_A  | L23B_R | E12B_A | 1.1E-06 | 2.3E-06 | 1.680E-06 | 3.874E-07 |
| 4590 | G13B_A | I20B_N | K17B_A | Q14B_A | 6.8E-07 | 2.9E-06 | 1.681E-06 | 5.081E-07 |
| 4591 | Y10B_A | E18B_A | F19B_W | L23B_R | 8.8E-07 | 3.3E-06 | 1.681E-06 | 5.750E-07 |
| 4592 | Y10B_A | S8B_A  | S9B_A  | V24B_N | 7.5E-07 | 2.7E-06 | 1.683E-06 | 5.456E-07 |
| 4593 | Y10B_A | I20B_Q | E18B_A | K17B_A | 9.6E-07 | 2.6E-06 | 1.683E-06 | 5.048E-07 |
| 4594 | G13B_A | I20B_T | S5B_A  | K17B_A | 9.8E-07 | 2.2E-06 | 1.684E-06 | 3.190E-07 |
| 4595 | Y10B_A | G13B_W | G1B_R  | S9B_A  | 8.9E-07 | 2.6E-06 | 1.684E-06 | 3.771E-07 |
| 4596 | Y10B_A | D6B_A  | I20B_Q | K17B_A | 8.1E-07 | 2.6E-06 | 1.685E-06 | 4.382E-07 |
| 4597 | Y10B_A | G13B_W | E18B_T | G1B_R  | 1.1E-06 | 2.7E-06 | 1.685E-06 | 5.304E-07 |
| 4598 | Y10B_A | I20B_N | Q14B_A | T2B_A  | 1.1E-06 | 2.4E-06 | 1.685E-06 | 3.617E-07 |
| 4599 | G13B_A | S8B_A  | I20B_T | K17B_A | 5.5E-07 | 2.6E-06 | 1.687E-06 | 5.083E-07 |
| 4600 | Y10B_A | T4B_A  | F19B_Q | L23B_Q | 8.0E-07 | 3.9E-06 | 1.687E-06 | 8.712E-07 |
| 4601 | G13B_A | F19B_W | E12B_A | G1B_A  | 9.7E-07 | 2.3E-06 | 1.689E-06 | 4.746E-07 |
| 4602 | G13B_A | Y10B_A | F19B_Q | E12B_A | 5.5E-07 | 2.5E-06 | 1.689E-06 | 5.203E-07 |
| 4603 | G13B_A | T4B_A  | K17B_S | E12B_A | 8.2E-07 | 2.8E-06 | 1.690E-06 | 5.993E-07 |
| 4604 | G13B_A | I20B_S | S5B_A  | K17B_A | 1.1E-06 | 2.4E-06 | 1.690E-06 | 3.177E-07 |
| 4605 | G13B_A | D6B_A  | L11B_A | L23B_R | 1.0E-06 | 3.0E-06 | 1.690E-06 | 4.800E-07 |
| 4606 | S8B_A  | G13B_W | G1B_R  | K17B_S | 1.0E-06 | 2.9E-06 | 1.690E-06 | 5.088E-07 |
| 4607 | G13B_A | I20B_N | K17B_A | T4B_A  | 9.3E-07 | 3.4E-06 | 1.691E-06 | 7.367E-07 |
| 4608 | S8B_A  | G13B_W | L23B_Q | Q14B_A | 7.1E-07 | 2.6E-06 | 1.691E-06 | 5.311E-07 |
| 4609 | S8B_A  | V7B_A  | A16B_N | V24B_N | 4.7E-07 | 3.4E-06 | 1.692E-06 | 8.259E-07 |
| 4610 | G13B_A | D6B_A  | G1B_R  | L23B_R | 9.5E-07 | 2.4E-06 | 1.692E-06 | 3.714E-07 |
| 4611 | G13B_A | S8B_A  | S9B_A  | K17B_S | 9.0E-07 | 4.2E-06 | 1.692E-06 | 6.781E-07 |
| 4612 | G13B_A | A16B_N | L11B_A | L23B_Q | 5.7E-07 | 2.7E-06 | 1.693E-06 | 5.437E-07 |
| 4613 | Y10B_A | S8B_A  | E18B_T | V24B_T | 9.8E-07 | 2.3E-06 | 1.694E-06 | 4.494E-07 |
| 4614 | Y10B_A | G13B_W | T4B_A  | L23B_Q | 5.8E-07 | 2.4E-06 | 1.694E-06 | 4.852E-07 |
| 4615 | Y10B_A | S9B_A  | V24B_Q | T2B_A  | 1.0E-06 | 2.7E-06 | 1.695E-06 | 4.968E-07 |
| 4616 | G13B_A | D6B_A  | A16B_N | V24B_Q | 3.8E-07 | 3.3E-06 | 1.695E-06 | 9.398E-07 |
| 4617 | S8B_A  | D6B_A  | L23B_R | E12B_A | 1.0E-06 | 3.0E-06 | 1.695E-06 | 5.236E-07 |
| 4618 | Y10B_A | G13B_W | S9B_A  | F19B_A | 1.2E-06 | 2.5E-06 | 1.695E-06 | 3.316E-07 |
| 4619 | Y10B_A | I20B_T | S5B_A  | Q14B_A | 7.9E-07 | 2.9E-06 | 1.695E-06 | 5.215E-07 |
| 4620 | G13B_A | I20B_S | K17B_A | Q14B_A | 9.3E-07 | 3.3E-06 | 1.696E-06 | 5.313E-07 |
| 4621 | G13B_A | V7B_A  | L11B_A | F19B_Q | 7.3E-07 | 3.2E-06 | 1.696E-06 | 6.436E-07 |
| 4622 | Y10B_A | I20B_N | T4B_A  | T2B_A  | 9.3E-07 | 2.6E-06 | 1.697E-06 | 4.207E-07 |
| 4623 | Y10B_A | F3B_A  | F19B_Q | E12B_A | 8.0E-07 | 3.0E-06 | 1.698E-06 | 6.679E-07 |
| 4624 | Y10B_A | S8B_A  | L23B_Q | E12B_A | 9.6E-07 | 3.0E-06 | 1.698E-06 | 5.379E-07 |
| 4625 | S8B_A  | D6B_A  | I20B_S | S5B_A  | 8.9E-07 | 3.5E-06 | 1.699E-06 | 6.171E-07 |
| 4626 | G13B_A | S5B_A  | F19B_Q | E12B_A | 6.8E-07 | 4.4E-06 | 1.700E-06 | 8.559E-07 |
| 4627 | G13B_A | S8B_A  | L23B_R | E12B_A | 1.0E-06 | 3.2E-06 | 1.700E-06 | 5.601E-07 |

|      |        |        |        |        |         |         |           |           |
|------|--------|--------|--------|--------|---------|---------|-----------|-----------|
| 4628 | Y10B_A | E18B_T | V24B_Q | Q14B_A | 1.0E-06 | 2.4E-06 | 1.700E-06 | 4.142E-07 |
| 4629 | Y10B_A | I20B_T | L11B_A | K17B_A | 9.3E-07 | 2.6E-06 | 1.702E-06 | 4.630E-07 |
| 4630 | Y10B_A | G13B_W | V24B_T | Q14B_A | 7.3E-07 | 2.5E-06 | 1.702E-06 | 3.990E-07 |
| 4631 | G13B_A | D6B_A  | L11B_A | V24B_T | 9.6E-07 | 2.8E-06 | 1.703E-06 | 4.477E-07 |
| 4632 | S8B_A  | D6B_A  | I20B_N | K17B_A | 1.0E-06 | 2.8E-06 | 1.705E-06 | 4.161E-07 |
| 4633 | Y10B_A | D6B_A  | S9B_A  | K17B_S | 1.1E-06 | 2.8E-06 | 1.705E-06 | 4.536E-07 |
| 4634 | G13B_A | D6B_A  | E18B_A | V24B_Q | 1.2E-06 | 3.0E-06 | 1.705E-06 | 3.790E-07 |
| 4635 | Y10B_A | G13B_W | V7B_A  | S9B_A  | 1.3E-06 | 2.2E-06 | 1.705E-06 | 2.762E-07 |
| 4636 | G13B_A | S9B_A  | K17B_S | T2B_A  | 9.4E-07 | 2.7E-06 | 1.706E-06 | 5.865E-07 |
| 4637 | Y10B_A | F3B_A  | F19B_Q | S9B_A  | 5.4E-07 | 3.3E-06 | 1.707E-06 | 8.558E-07 |
| 4638 | Y10B_A | F19B_W | Q14B_A | V24B_N | 6.7E-07 | 3.1E-06 | 1.708E-06 | 6.983E-07 |
| 4639 | G13B_A | K17B_A | S9B_A  | V24B_N | 1.1E-06 | 2.2E-06 | 1.710E-06 | 2.918E-07 |
| 4640 | G13B_A | G1B_R  | V24B_Q | Q14B_A | 1.1E-06 | 2.3E-06 | 1.710E-06 | 3.007E-07 |
| 4641 | G13B_A | L23B_R | T2B_A  | E12B_A | 1.2E-06 | 2.4E-06 | 1.710E-06 | 3.611E-07 |
| 4642 | Y10B_A | G13B_W | E18B_T | L11B_A | 1.0E-06 | 3.2E-06 | 1.710E-06 | 5.418E-07 |
| 4643 | Y10B_A | I20B_N | S5B_A  | T4B_A  | 1.1E-06 | 3.0E-06 | 1.710E-06 | 4.553E-07 |
| 4644 | Y10B_A | G13B_W | A16B_N | L23B_Q | 1.1E-06 | 2.8E-06 | 1.710E-06 | 5.340E-07 |
| 4645 | G13B_A | E18B_A | S9B_A  | E12B_A | 1.1E-06 | 2.5E-06 | 1.710E-06 | 4.723E-07 |
| 4646 | Y10B_A | S5B_A  | S9B_A  | V24B_T | 1.1E-06 | 2.2E-06 | 1.710E-06 | 2.751E-07 |
| 4647 | Y10B_A | I20B_Q | K17B_A | G1B_A  | 8.4E-07 | 2.9E-06 | 1.712E-06 | 5.761E-07 |
| 4648 | Y10B_A | F19B_A | V24B_T | E12B_A | 7.7E-07 | 3.2E-06 | 1.713E-06 | 6.788E-07 |
| 4649 | Y10B_A | G13B_W | S5B_A  | V24B_Q | 9.6E-07 | 2.5E-06 | 1.713E-06 | 4.319E-07 |
| 4650 | G13B_A | E18B_T | T4B_A  | F19B_Q | 6.6E-07 | 3.1E-06 | 1.714E-06 | 6.713E-07 |
| 4651 | Y10B_A | G13B_W | L23B_Q | Q14B_A | 9.8E-07 | 3.1E-06 | 1.714E-06 | 5.765E-07 |
| 4652 | G13B_A | E18B_T | K17B_S | T2B_A  | 8.0E-07 | 3.0E-06 | 1.714E-06 | 5.682E-07 |
| 4653 | G13B_A | S8B_A  | G1B_R  | V24B_T | 1.0E-06 | 2.3E-06 | 1.715E-06 | 3.498E-07 |
| 4654 | G13B_A | E18B_A | F19B_A | V24B_T | 1.0E-06 | 2.9E-06 | 1.715E-06 | 5.019E-07 |
| 4655 | Y10B_A | E18B_T | G1B_R  | F19B_W | 9.4E-07 | 2.5E-06 | 1.716E-06 | 4.883E-07 |
| 4656 | G13B_A | F19B_Q | S9B_A  | T2B_A  | 6.8E-07 | 3.3E-06 | 1.716E-06 | 6.459E-07 |
| 4657 | G13B_A | K17B_A | F19B_Q | L23B_R | 8.7E-07 | 3.1E-06 | 1.716E-06 | 6.374E-07 |
| 4658 | G13B_A | E18B_T | L11B_A | F19B_W | 7.6E-07 | 3.4E-06 | 1.717E-06 | 6.507E-07 |
| 4659 | Y10B_A | D6B_A  | G13B_W | F19B_Q | 5.9E-07 | 3.1E-06 | 1.718E-06 | 5.436E-07 |
| 4660 | Y10B_A | A16B_N | V24B_N | G1B_A  | 4.7E-07 | 4.0E-06 | 1.719E-06 | 9.416E-07 |
| 4661 | Y10B_A | E18B_T | V24B_T | Q14B_A | 1.0E-06 | 2.7E-06 | 1.720E-06 | 4.538E-07 |
| 4662 | Y10B_A | S8B_A  | G13B_W | V24B_T | 1.1E-06 | 2.2E-06 | 1.720E-06 | 2.984E-07 |
| 4663 | G13B_A | D6B_A  | F3B_A  | V24B_N | 7.9E-07 | 2.8E-06 | 1.720E-06 | 4.926E-07 |
| 4664 | G13B_A | G1B_R  | S5B_A  | V24B_N | 1.2E-06 | 2.7E-06 | 1.720E-06 | 4.538E-07 |
| 4665 | Y10B_A | V7B_A  | I20B_S | K17B_A | 1.1E-06 | 2.9E-06 | 1.720E-06 | 5.357E-07 |
| 4666 | G13B_A | G1B_R  | V24B_Q | T2B_A  | 8.9E-07 | 2.7E-06 | 1.720E-06 | 4.773E-07 |
| 4667 | Y10B_A | F19B_W | V24B_Q | Q14B_A | 8.1E-07 | 2.7E-06 | 1.721E-06 | 5.075E-07 |
| 4668 | G13B_A | E18B_A | G1B_R  | L23B_R | 9.5E-07 | 3.0E-06 | 1.722E-06 | 5.136E-07 |
| 4669 | S8B_A  | G13B_W | S5B_A  | L23B_Q | 8.4E-07 | 2.8E-06 | 1.722E-06 | 5.648E-07 |
| 4670 | G13B_A | A16B_N | G1B_R  | F19B_W | 4.3E-07 | 4.3E-06 | 1.723E-06 | 1.105E-06 |
| 4671 | G13B_A | V7B_A  | E18B_A | V24B_Q | 8.7E-07 | 2.4E-06 | 1.724E-06 | 4.358E-07 |
| 4672 | G13B_A | F3B_A  | G1B_R  | K17B_S | 1.0E-06 | 4.5E-06 | 1.725E-06 | 7.398E-07 |
| 4673 | Y10B_A | K17B_S | V24B_T | Q14B_A | 1.1E-06 | 3.1E-06 | 1.725E-06 | 5.280E-07 |
| 4674 | G13B_A | V7B_A  | E18B_T | G1B_R  | 1.2E-06 | 2.7E-06 | 1.725E-06 | 3.892E-07 |
| 4675 | G13B_A | S5B_A  | S9B_A  | K17B_S | 8.9E-07 | 2.6E-06 | 1.725E-06 | 4.504E-07 |
| 4676 | G13B_A | I20B_S | K17B_A | T4B_A  | 1.1E-06 | 2.7E-06 | 1.725E-06 | 4.327E-07 |
| 4677 | Y10B_A | K17B_A | L23B_R | V24B_T | 1.0E-06 | 3.2E-06 | 1.725E-06 | 5.350E-07 |
| 4678 | G13B_A | S9B_A  | E12B_A | G1B_A  | 9.4E-07 | 3.6E-06 | 1.726E-06 | 6.090E-07 |
| 4679 | Y10B_A | S9B_A  | T2B_A  | V24B_N | 7.5E-07 | 2.7E-06 | 1.726E-06 | 5.660E-07 |

|      |        |        |        |        |         |         |           |           |
|------|--------|--------|--------|--------|---------|---------|-----------|-----------|
| 4680 | G13B_A | D6B_A  | L23B_Q | F19B_A | 9.5E-07 | 2.9E-06 | 1.727E-06 | 5.418E-07 |
| 4681 | Y10B_A | I20B_T | K17B_A | G1B_A  | 9.7E-07 | 2.4E-06 | 1.727E-06 | 4.540E-07 |
| 4682 | S8B_A  | D6B_A  | E18B_T | K17B_S | 5.7E-07 | 2.9E-06 | 1.727E-06 | 6.637E-07 |
| 4683 | Y10B_A | V7B_A  | S9B_A  | K17B_S | 7.6E-07 | 3.0E-06 | 1.728E-06 | 5.990E-07 |
| 4684 | S8B_A  | G13B_W | F3B_A  | S9B_A  | 5.9E-07 | 2.3E-06 | 1.729E-06 | 4.003E-07 |
| 4685 | G13B_A | F19B_A | V24B_T | G1B_A  | 1.1E-06 | 4.5E-06 | 1.730E-06 | 7.505E-07 |
| 4686 | Y10B_A | F3B_A  | K17B_S | E12B_A | 1.1E-06 | 2.5E-06 | 1.730E-06 | 4.256E-07 |
| 4687 | G13B_A | Y10B_A | S9B_A  | K17B_S | 8.7E-07 | 2.6E-06 | 1.732E-06 | 4.739E-07 |
| 4688 | S8B_A  | G13B_W | F3B_A  | K17B_S | 9.5E-07 | 2.5E-06 | 1.732E-06 | 3.988E-07 |
| 4689 | G13B_A | L11B_A | G1B_R  | F19B_Q | 9.4E-07 | 5.4E-06 | 1.732E-06 | 9.295E-07 |
| 4690 | Y10B_A | K17B_A | F19B_Q | V24B_T | 9.3E-07 | 2.7E-06 | 1.734E-06 | 5.980E-07 |
| 4691 | Y10B_A | I20B_N | E18B_A | S5B_A  | 1.1E-06 | 2.7E-06 | 1.735E-06 | 4.705E-07 |
| 4692 | Y10B_A | G13B_W | V24B_T | T2B_A  | 1.2E-06 | 2.5E-06 | 1.735E-06 | 3.233E-07 |
| 4693 | S8B_A  | G13B_W | E18B_T | L11B_A | 1.2E-06 | 2.5E-06 | 1.735E-06 | 3.774E-07 |
| 4694 | Y10B_A | A16B_N | L11B_A | V24B_N | 4.9E-07 | 3.5E-06 | 1.735E-06 | 9.253E-07 |
| 4695 | G13B_A | E18B_A | L23B_Q | G1B_A  | 1.1E-06 | 3.0E-06 | 1.735E-06 | 5.224E-07 |
| 4696 | Y10B_A | F3B_A  | E18B_T | S9B_A  | 1.2E-06 | 3.0E-06 | 1.735E-06 | 5.489E-07 |
| 4697 | Y10B_A | G1B_R  | F19B_A | V24B_Q | 1.0E-06 | 3.1E-06 | 1.735E-06 | 5.060E-07 |
| 4698 | Y10B_A | S5B_A  | F19B_W | V24B_Q | 7.8E-07 | 2.9E-06 | 1.737E-06 | 5.816E-07 |
| 4699 | S8B_A  | G13B_W | S5B_A  | V24B_T | 9.7E-07 | 2.6E-06 | 1.738E-06 | 3.694E-07 |
| 4700 | Y10B_A | S5B_A  | F19B_W | V24B_N | 9.7E-07 | 2.6E-06 | 1.738E-06 | 5.416E-07 |
| 4701 | G13B_A | D6B_A  | L11B_A | L23B_Q | 9.8E-07 | 2.3E-06 | 1.739E-06 | 4.364E-07 |
| 4702 | Y10B_A | S8B_A  | G13B_W | V24B_Q | 1.2E-06 | 3.1E-06 | 1.740E-06 | 4.828E-07 |
| 4703 | Y10B_A | I20B_N | K17B_A | G1B_A  | 1.1E-06 | 2.9E-06 | 1.740E-06 | 5.009E-07 |
| 4704 | Y10B_A | L23B_Q | K17B_S | Q14B_A | 1.1E-06 | 2.8E-06 | 1.740E-06 | 5.725E-07 |
| 4705 | Y10B_A | G13B_W | Q14B_A | V24B_N | 7.2E-07 | 3.6E-06 | 1.744E-06 | 6.809E-07 |
| 4706 | Y10B_A | G13B_W | T4B_A  | V24B_N | 8.1E-07 | 2.6E-06 | 1.745E-06 | 4.785E-07 |
| 4707 | Y10B_A | G1B_R  | S9B_A  | K17B_S | 1.0E-06 | 2.5E-06 | 1.745E-06 | 4.211E-07 |
| 4708 | Y10B_A | I20B_N | G1B_R  | K17B_A | 1.2E-06 | 2.3E-06 | 1.745E-06 | 2.460E-07 |
| 4709 | Y10B_A | F19B_W | T4B_A  | V24B_N | 9.1E-07 | 3.1E-06 | 1.745E-06 | 6.346E-07 |
| 4710 | G13B_A | K17B_A | S9B_A  | L23B_Q | 1.2E-06 | 2.9E-06 | 1.745E-06 | 4.466E-07 |
| 4711 | Y10B_A | G13B_W | L11B_A | S9B_A  | 1.0E-06 | 2.2E-06 | 1.745E-06 | 2.704E-07 |
| 4712 | S8B_A  | D6B_A  | G13B_W | K17B_S | 1.3E-06 | 2.7E-06 | 1.745E-06 | 3.663E-07 |
| 4713 | G13B_A | Y10B_A | D6B_A  | V24B_Q | 1.0E-06 | 2.8E-06 | 1.745E-06 | 4.298E-07 |
| 4714 | Y10B_A | G1B_R  | F19B_Q | S9B_A  | 6.6E-07 | 2.7E-06 | 1.746E-06 | 6.068E-07 |
| 4715 | G13B_A | V7B_A  | G1B_R  | K17B_S | 9.2E-07 | 3.4E-06 | 1.746E-06 | 6.094E-07 |
| 4716 | Y10B_A | G13B_W | T4B_A  | F19B_Q | 7.4E-07 | 3.1E-06 | 1.747E-06 | 5.915E-07 |
| 4717 | Y10B_A | Q14B_A | E12B_A | V24B_N | 8.6E-07 | 2.9E-06 | 1.748E-06 | 4.436E-07 |
| 4718 | Y10B_A | D6B_A  | F19B_W | V24B_T | 9.6E-07 | 2.5E-06 | 1.748E-06 | 4.384E-07 |
| 4719 | G13B_A | V7B_A  | L11B_A | L23B_R | 5.7E-07 | 2.5E-06 | 1.749E-06 | 4.910E-07 |
| 4720 | G13B_A | E18B_T | L11B_A | G1B_R  | 1.0E-06 | 2.5E-06 | 1.750E-06 | 4.395E-07 |
| 4721 | Y10B_A | S9B_A  | K17B_S | G1B_A  | 8.0E-07 | 3.7E-06 | 1.750E-06 | 6.091E-07 |
| 4722 | Y10B_A | A16B_N | V24B_Q | G1B_A  | 2.9E-07 | 3.3E-06 | 1.750E-06 | 9.685E-07 |
| 4723 | Y10B_A | S9B_A  | L23B_Q | Q14B_A | 9.0E-07 | 2.9E-06 | 1.750E-06 | 5.952E-07 |
| 4724 | Y10B_A | G13B_W | T4B_A  | V24B_Q | 1.1E-06 | 3.6E-06 | 1.750E-06 | 5.296E-07 |
| 4725 | G13B_A | F3B_A  | S5B_A  | V24B_Q | 1.1E-06 | 2.7E-06 | 1.750E-06 | 3.887E-07 |
| 4726 | Y10B_A | L11B_A | E18B_A | V24B_N | 9.1E-07 | 3.3E-06 | 1.751E-06 | 5.709E-07 |
| 4727 | Y10B_A | S5B_A  | S9B_A  | L23B_R | 7.2E-07 | 2.4E-06 | 1.751E-06 | 4.695E-07 |
| 4728 | Y10B_A | S8B_A  | I20B_T | Q14B_A | 8.3E-07 | 2.9E-06 | 1.752E-06 | 5.269E-07 |
| 4729 | G13B_A | A16B_N | F19B_Q | G1B_A  | 5.0E-07 | 2.6E-06 | 1.752E-06 | 5.697E-07 |
| 4730 | G13B_A | V7B_A  | V24B_Q | Q14B_A | 6.6E-07 | 2.5E-06 | 1.753E-06 | 4.177E-07 |
| 4731 | Y10B_A | S9B_A  | K17B_S | F19B_A | 9.8E-07 | 2.9E-06 | 1.754E-06 | 4.679E-07 |

|      |        |        |        |        |         |         |           |           |
|------|--------|--------|--------|--------|---------|---------|-----------|-----------|
| 4732 | G13B_A | S5B_A  | F19B_A | V24B_Q | 7.8E-07 | 2.8E-06 | 1.754E-06 | 4.684E-07 |
| 4733 | G13B_A | D6B_A  | E18B_T | F19B_W | 7.1E-07 | 3.7E-06 | 1.754E-06 | 7.980E-07 |
| 4734 | G13B_A | F19B_A | V24B_Q | T2B_A  | 9.2E-07 | 2.6E-06 | 1.754E-06 | 4.723E-07 |
| 4735 | G13B_A | S8B_A  | F19B_A | V24B_N | 1.1E-06 | 3.0E-06 | 1.755E-06 | 4.696E-07 |
| 4736 | Y10B_A | D6B_A  | I20B_S | T2B_A  | 1.0E-06 | 2.4E-06 | 1.755E-06 | 3.471E-07 |
| 4737 | G13B_A | I20B_T | K17B_A | T4B_A  | 1.1E-06 | 2.6E-06 | 1.755E-06 | 4.249E-07 |
| 4738 | S8B_A  | G13B_W | K17B_S | G1B_A  | 9.1E-07 | 3.1E-06 | 1.755E-06 | 6.470E-07 |
| 4739 | S8B_A  | D6B_A  | E12B_A | V24B_N | 8.0E-07 | 2.8E-06 | 1.755E-06 | 5.671E-07 |
| 4740 | Y10B_A | V7B_A  | E18B_T | S9B_A  | 8.4E-07 | 2.7E-06 | 1.757E-06 | 4.151E-07 |
| 4741 | S8B_A  | V7B_A  | F3B_A  | V24B_Q | 9.6E-07 | 2.7E-06 | 1.758E-06 | 5.237E-07 |
| 4742 | Y10B_A | A16B_N | G1B_R  | L23B_Q | 4.7E-07 | 5.3E-06 | 1.759E-06 | 1.114E-06 |
| 4743 | G13B_A | S8B_A  | E18B_T | K17B_S | 9.4E-07 | 3.2E-06 | 1.759E-06 | 6.749E-07 |
| 4744 | Y10B_A | G13B_W | L23B_Q | T2B_A  | 7.8E-07 | 2.8E-06 | 1.759E-06 | 6.090E-07 |
| 4745 | G13B_A | V7B_A  | E18B_A | L23B_Q | 9.8E-07 | 3.5E-06 | 1.759E-06 | 5.399E-07 |
| 4746 | G13B_A | L11B_A | T4B_A  | L23B_Q | 6.8E-07 | 3.0E-06 | 1.759E-06 | 5.084E-07 |
| 4747 | Y10B_A | S9B_A  | V24B_T | T2B_A  | 1.0E-06 | 2.8E-06 | 1.760E-06 | 5.051E-07 |
| 4748 | G13B_A | E18B_T | K17B_A | L23B_Q | 1.0E-06 | 2.9E-06 | 1.760E-06 | 5.335E-07 |
| 4749 | G13B_A | K17B_A | S9B_A  | V24B_T | 1.2E-06 | 2.6E-06 | 1.760E-06 | 3.515E-07 |
| 4750 | G13B_A | D6B_A  | L23B_R | F19B_A | 7.1E-07 | 2.8E-06 | 1.761E-06 | 4.717E-07 |
| 4751 | G13B_A | D6B_A  | E18B_A | V24B_N | 8.4E-07 | 2.7E-06 | 1.761E-06 | 5.500E-07 |
| 4752 | Y10B_A | T4B_A  | K17B_S | V24B_T | 9.3E-07 | 2.5E-06 | 1.761E-06 | 4.178E-07 |
| 4753 | Y10B_A | F3B_A  | V24B_N | G1B_A  | 8.2E-07 | 3.0E-06 | 1.761E-06 | 5.482E-07 |
| 4754 | Y10B_A | A16B_N | L23B_R | E12B_A | 5.1E-07 | 3.4E-06 | 1.763E-06 | 6.712E-07 |
| 4755 | S8B_A  | G13B_W | T4B_A  | V24B_Q | 9.6E-07 | 2.7E-06 | 1.763E-06 | 4.321E-07 |
| 4756 | G13B_A | E18B_T | T4B_A  | S9B_A  | 9.9E-07 | 3.2E-06 | 1.764E-06 | 5.361E-07 |
| 4757 | G13B_A | F3B_A  | A16B_N | F19B_Q | 3.9E-07 | 3.3E-06 | 1.765E-06 | 1.035E-06 |
| 4758 | Y10B_A | K17B_A | F19B_Q | V24B_Q | 5.7E-07 | 3.9E-06 | 1.765E-06 | 7.555E-07 |
| 4759 | Y10B_A | T4B_A  | V24B_Q | E12B_A | 1.1E-06 | 2.3E-06 | 1.765E-06 | 3.731E-07 |
| 4760 | Y10B_A | V24B_Q | Q14B_A | E12B_A | 1.1E-06 | 2.6E-06 | 1.765E-06 | 3.787E-07 |
| 4761 | S8B_A  | G13B_W | V7B_A  | K17B_S | 9.1E-07 | 2.9E-06 | 1.766E-06 | 5.093E-07 |
| 4762 | G13B_A | I20B_N | S5B_A  | K17B_A | 9.4E-07 | 2.4E-06 | 1.766E-06 | 4.773E-07 |
| 4763 | S8B_A  | G13B_W | T2B_A  | V24B_N | 9.6E-07 | 2.9E-06 | 1.766E-06 | 6.030E-07 |
| 4764 | S8B_A  | G13B_W | S5B_A  | V24B_Q | 8.2E-07 | 3.1E-06 | 1.766E-06 | 6.612E-07 |
| 4765 | Y10B_A | I20B_N | S5B_A  | Q14B_A | 9.4E-07 | 2.9E-06 | 1.767E-06 | 5.330E-07 |
| 4766 | Y10B_A | L11B_A | F19B_Q | E12B_A | 4.0E-07 | 3.0E-06 | 1.770E-06 | 6.408E-07 |
| 4767 | Y10B_A | F3B_A  | I20B_T | K17B_A | 1.3E-06 | 2.6E-06 | 1.770E-06 | 3.600E-07 |
| 4768 | G13B_A | G1B_R  | L23B_Q | T2B_A  | 1.1E-06 | 3.2E-06 | 1.770E-06 | 4.281E-07 |
| 4769 | G13B_A | S8B_A  | L11B_A | V24B_N | 1.1E-06 | 3.0E-06 | 1.770E-06 | 4.555E-07 |
| 4770 | G13B_A | A16B_N | L11B_A | K17B_S | 7.9E-07 | 3.7E-06 | 1.771E-06 | 8.008E-07 |
| 4771 | Y10B_A | G13B_W | A16B_N | E12B_A | 3.8E-07 | 3.0E-06 | 1.771E-06 | 8.293E-07 |
| 4772 | Y10B_A | E18B_T | S5B_A  | L23B_R | 9.3E-07 | 3.7E-06 | 1.771E-06 | 6.825E-07 |
| 4773 | G13B_A | F19B_Q | S9B_A  | Q14B_A | 6.3E-07 | 6.6E-06 | 1.771E-06 | 1.281E-06 |
| 4774 | Y10B_A | S5B_A  | E12B_A | V24B_N | 9.4E-07 | 2.8E-06 | 1.772E-06 | 5.288E-07 |
| 4775 | G13B_A | S8B_A  | L11B_A | V24B_Q | 6.6E-07 | 2.6E-06 | 1.773E-06 | 5.670E-07 |
| 4776 | G13B_A | D6B_A  | F19B_A | V24B_T | 9.6E-07 | 3.7E-06 | 1.773E-06 | 7.197E-07 |
| 4777 | Y10B_A | F19B_W | V24B_T | Q14B_A | 9.6E-07 | 2.8E-06 | 1.773E-06 | 4.747E-07 |
| 4778 | Y10B_A | V7B_A  | L11B_A | V24B_Q | 9.6E-07 | 2.6E-06 | 1.773E-06 | 3.880E-07 |
| 4779 | Y10B_A | G13B_W | E18B_T | F19B_A | 8.6E-07 | 3.1E-06 | 1.773E-06 | 7.612E-07 |
| 4780 | S8B_A  | G13B_W | T4B_A  | V24B_N | 1.1E-06 | 2.6E-06 | 1.775E-06 | 4.700E-07 |
| 4781 | Y10B_A | F19B_W | V24B_Q | T2B_A  | 1.0E-06 | 3.1E-06 | 1.775E-06 | 5.408E-07 |
| 4782 | Y10B_A | I20B_Q | K17B_A | F19B_A | 8.9E-07 | 2.7E-06 | 1.775E-06 | 4.743E-07 |
| 4783 | Y10B_A | V7B_A  | I20B_T | K17B_A | 8.9E-07 | 3.2E-06 | 1.778E-06 | 5.141E-07 |

|      |        |        |        |        |         |         |           |           |
|------|--------|--------|--------|--------|---------|---------|-----------|-----------|
| 4784 | G13B_A | Y10B_A | G1B_R  | V24B_T | 9.0E-07 | 2.3E-06 | 1.780E-06 | 3.861E-07 |
| 4785 | G13B_A | L11B_A | L23B_R | G1B_A  | 1.1E-06 | 4.1E-06 | 1.780E-06 | 7.661E-07 |
| 4786 | G13B_A | Y10B_A | F19B_W | S9B_A  | 1.0E-06 | 2.8E-06 | 1.780E-06 | 5.386E-07 |
| 4787 | Y10B_A | A16B_N | E18B_A | V24B_N | 5.9E-07 | 3.1E-06 | 1.780E-06 | 7.700E-07 |
| 4788 | Y10B_A | F3B_A  | G1B_R  | L23B_Q | 7.4E-07 | 3.1E-06 | 1.783E-06 | 5.406E-07 |
| 4789 | Y10B_A | E18B_T | F19B_Q | Q14B_A | 9.8E-07 | 3.5E-06 | 1.784E-06 | 7.524E-07 |
| 4790 | Y10B_A | A16B_N | F19B_W | L23B_R | 6.2E-07 | 3.3E-06 | 1.784E-06 | 6.655E-07 |
| 4791 | G13B_A | A16B_N | L23B_Q | Q14B_A | 6.4E-07 | 3.5E-06 | 1.784E-06 | 7.936E-07 |
| 4792 | S8B_A  | D6B_A  | A16B_N | V24B_N | 5.9E-07 | 3.2E-06 | 1.784E-06 | 7.819E-07 |
| 4793 | Y10B_A | L11B_A | G1B_R  | V24B_Q | 1.1E-06 | 2.9E-06 | 1.785E-06 | 4.499E-07 |
| 4794 | Y10B_A | E18B_T | L23B_Q | Q14B_A | 1.0E-06 | 3.7E-06 | 1.785E-06 | 7.372E-07 |
| 4795 | G13B_A | E18B_T | K17B_S | Q14B_A | 1.1E-06 | 3.3E-06 | 1.785E-06 | 6.167E-07 |
| 4796 | G13B_A | G1B_R  | S5B_A  | V24B_T | 1.2E-06 | 2.6E-06 | 1.785E-06 | 4.332E-07 |
| 4797 | G13B_A | F3B_A  | S5B_A  | V24B_N | 9.6E-07 | 2.6E-06 | 1.786E-06 | 5.315E-07 |
| 4798 | G13B_A | L11B_A | F19B_W | E12B_A | 7.8E-07 | 5.9E-06 | 1.786E-06 | 1.172E-06 |
| 4799 | Y10B_A | S8B_A  | E18B_T | V24B_N | 8.3E-07 | 3.9E-06 | 1.786E-06 | 6.731E-07 |
| 4800 | S8B_A  | G13B_W | T4B_A  | F19B_Q | 8.1E-07 | 3.0E-06 | 1.786E-06 | 5.870E-07 |
| 4801 | G13B_A | G1B_R  | T4B_A  | V24B_T | 9.4E-07 | 2.6E-06 | 1.787E-06 | 3.767E-07 |
| 4802 | Y10B_A | E18B_T | T4B_A  | V24B_N | 8.4E-07 | 2.7E-06 | 1.787E-06 | 5.519E-07 |
| 4803 | Y10B_A | G13B_W | S5B_A  | V24B_N | 8.5E-07 | 3.0E-06 | 1.788E-06 | 5.052E-07 |
| 4804 | Y10B_A | V7B_A  | F3B_A  | V24B_Q | 8.5E-07 | 2.6E-06 | 1.788E-06 | 5.083E-07 |
| 4805 | Y10B_A | D6B_A  | F19B_Q | S9B_A  | 4.5E-07 | 4.2E-06 | 1.788E-06 | 9.600E-07 |
| 4806 | Y10B_A | E18B_A | V24B_Q | G1B_A  | 8.7E-07 | 2.4E-06 | 1.789E-06 | 4.444E-07 |
| 4807 | G13B_A | A16B_N | L23B_R | F19B_A | 4.0E-07 | 3.7E-06 | 1.790E-06 | 7.767E-07 |
| 4808 | Y10B_A | E18B_T | L11B_A | K17B_S | 1.1E-06 | 2.8E-06 | 1.790E-06 | 5.884E-07 |
| 4809 | S8B_A  | G13B_W | V7B_A  | S9B_A  | 1.2E-06 | 2.6E-06 | 1.790E-06 | 3.837E-07 |
| 4810 | S8B_A  | G13B_W | G1B_R  | F19B_W | 1.0E-06 | 2.9E-06 | 1.790E-06 | 4.447E-07 |
| 4811 | S8B_A  | D6B_A  | I20B_T | K17B_A | 1.1E-06 | 2.6E-06 | 1.790E-06 | 3.824E-07 |
| 4812 | Y10B_A | S8B_A  | I20B_T | T4B_A  | 1.1E-06 | 2.4E-06 | 1.790E-06 | 3.508E-07 |
| 4813 | Y10B_A | L11B_A | G1B_R  | V24B_N | 8.4E-07 | 4.0E-06 | 1.792E-06 | 6.521E-07 |
| 4814 | Y10B_A | A16B_N | E18B_A | V24B_Q | 3.6E-07 | 3.3E-06 | 1.793E-06 | 7.760E-07 |
| 4815 | Y10B_A | A16B_N | F19B_W | K17B_S | 5.5E-07 | 3.8E-06 | 1.794E-06 | 1.002E-06 |
| 4816 | Y10B_A | G13B_W | F3B_A  | E18B_T | 6.9E-07 | 3.1E-06 | 1.794E-06 | 5.483E-07 |
| 4817 | G13B_A | F3B_A  | L11B_A | L23B_R | 8.5E-07 | 2.9E-06 | 1.795E-06 | 6.145E-07 |
| 4818 | Y10B_A | V7B_A  | G1B_R  | V24B_N | 1.0E-06 | 2.9E-06 | 1.795E-06 | 5.052E-07 |
| 4819 | Y10B_A | S5B_A  | V24B_Q | E12B_A | 1.2E-06 | 2.5E-06 | 1.795E-06 | 4.097E-07 |
| 4820 | Y10B_A | I20B_N | K17B_A | F19B_A | 1.0E-06 | 2.7E-06 | 1.795E-06 | 4.785E-07 |
| 4821 | G13B_A | V24B_Q | Q14B_A | G1B_A  | 1.2E-06 | 2.7E-06 | 1.795E-06 | 3.441E-07 |
| 4822 | G13B_A | F19B_W | T4B_A  | K17B_S | 1.0E-06 | 3.1E-06 | 1.795E-06 | 4.763E-07 |
| 4823 | G13B_A | Y10B_A | E18B_T | S9B_A  | 1.2E-06 | 2.8E-06 | 1.795E-06 | 4.883E-07 |
| 4824 | G13B_A | F3B_A  | Q14B_A | V24B_N | 1.0E-06 | 2.6E-06 | 1.795E-06 | 4.466E-07 |
| 4825 | Y10B_A | F3B_A  | G1B_R  | L23B_R | 1.2E-06 | 2.7E-06 | 1.795E-06 | 4.224E-07 |
| 4826 | Y10B_A | S8B_A  | K17B_S | V24B_T | 8.9E-07 | 2.3E-06 | 1.795E-06 | 4.345E-07 |
| 4827 | Y10B_A | S8B_A  | F19B_Q | L23B_R | 1.0E-06 | 3.1E-06 | 1.795E-06 | 6.091E-07 |
| 4828 | Y10B_A | S5B_A  | K17B_S | V24B_T | 9.3E-07 | 3.0E-06 | 1.796E-06 | 5.955E-07 |
| 4829 | Y10B_A | I20B_S | S5B_A  | T2B_A  | 9.4E-07 | 3.1E-06 | 1.797E-06 | 5.130E-07 |
| 4830 | Y10B_A | S5B_A  | F19B_Q | K17B_S | 6.5E-07 | 4.4E-06 | 1.799E-06 | 9.061E-07 |
| 4831 | Y10B_A | E18B_T | S5B_A  | L23B_Q | 9.0E-07 | 3.2E-06 | 1.800E-06 | 5.876E-07 |
| 4832 | G13B_A | S9B_A  | K17B_S | Q14B_A | 1.1E-06 | 3.2E-06 | 1.800E-06 | 5.120E-07 |
| 4833 | Y10B_A | E18B_T | L23B_R | T2B_A  | 1.1E-06 | 2.5E-06 | 1.800E-06 | 3.129E-07 |
| 4834 | Y10B_A | G13B_W | S5B_A  | V24B_T | 1.0E-06 | 3.2E-06 | 1.800E-06 | 5.496E-07 |
| 4835 | Y10B_A | S8B_A  | E18B_T | L23B_Q | 9.0E-07 | 3.0E-06 | 1.800E-06 | 5.439E-07 |

|      |        |        |        |        |         |         |           |           |
|------|--------|--------|--------|--------|---------|---------|-----------|-----------|
| 4836 | Y10B_A | F3B_A  | G1B_R  | V24B_N | 1.0E-06 | 2.9E-06 | 1.800E-06 | 4.790E-07 |
| 4837 | G13B_A | G1B_R  | V24B_T | Q14B_A | 1.1E-06 | 3.1E-06 | 1.800E-06 | 4.611E-07 |
| 4838 | G13B_A | F19B_Q | T2B_A  | E12B_A | 5.8E-07 | 3.3E-06 | 1.801E-06 | 7.426E-07 |
| 4839 | G13B_A | E18B_T | S5B_A  | E12B_A | 9.4E-07 | 2.6E-06 | 1.802E-06 | 4.454E-07 |
| 4840 | G13B_A | F3B_A  | A16B_N | V24B_T | 6.3E-07 | 2.8E-06 | 1.802E-06 | 4.773E-07 |
| 4841 | G13B_A | S5B_A  | F19B_W | L23B_R | 9.5E-07 | 3.6E-06 | 1.802E-06 | 6.379E-07 |
| 4842 | G13B_A | D6B_A  | L23B_Q | G1B_A  | 9.8E-07 | 3.2E-06 | 1.802E-06 | 5.651E-07 |
| 4843 | Y10B_A | F3B_A  | L11B_A | V24B_Q | 9.6E-07 | 2.5E-06 | 1.803E-06 | 3.944E-07 |
| 4844 | Y10B_A | G13B_W | G1B_R  | F19B_W | 7.7E-07 | 2.7E-06 | 1.803E-06 | 5.297E-07 |
| 4845 | Y10B_A | F3B_A  | F19B_W | K17B_S | 1.1E-06 | 3.1E-06 | 1.805E-06 | 5.568E-07 |
| 4846 | S8B_A  | G13B_W | V7B_A  | E18B_T | 1.2E-06 | 3.1E-06 | 1.805E-06 | 6.048E-07 |
| 4847 | G13B_A | E18B_A | T4B_A  | V24B_N | 1.2E-06 | 2.8E-06 | 1.805E-06 | 5.296E-07 |
| 4848 | S8B_A  | D6B_A  | E18B_T | S9B_A  | 9.0E-07 | 2.7E-06 | 1.805E-06 | 5.326E-07 |
| 4849 | G13B_A | V7B_A  | Q14B_A | V24B_N | 1.0E-06 | 2.6E-06 | 1.805E-06 | 4.740E-07 |
| 4850 | Y10B_A | I20B_Q | K17B_A | Q14B_A | 1.0E-06 | 2.9E-06 | 1.805E-06 | 5.063E-07 |
| 4851 | Y10B_A | E18B_A | L23B_R | E12B_A | 9.2E-07 | 2.8E-06 | 1.806E-06 | 5.012E-07 |
| 4852 | Y10B_A | V7B_A  | E18B_T | F19B_Q | 6.6E-07 | 3.8E-06 | 1.807E-06 | 8.481E-07 |
| 4853 | G13B_A | E18B_T | F19B_Q | T2B_A  | 4.4E-07 | 3.6E-06 | 1.808E-06 | 6.929E-07 |
| 4854 | Y10B_A | D6B_A  | L23B_Q | E12B_A | 1.1E-06 | 3.0E-06 | 1.810E-06 | 5.848E-07 |
| 4855 | G13B_A | E18B_T | S5B_A  | S9B_A  | 1.0E-06 | 2.8E-06 | 1.810E-06 | 4.767E-07 |
| 4856 | G13B_A | F19B_W | L23B_R | Q14B_A | 1.1E-06 | 3.4E-06 | 1.810E-06 | 6.112E-07 |
| 4857 | G13B_A | Y10B_A | E18B_T | K17B_S | 1.1E-06 | 4.1E-06 | 1.810E-06 | 6.766E-07 |
| 4858 | G13B_A | V7B_A  | E18B_A | L23B_R | 1.1E-06 | 2.7E-06 | 1.810E-06 | 4.303E-07 |
| 4859 | G13B_A | Y10B_A | F19B_W | K17B_S | 8.7E-07 | 3.3E-06 | 1.811E-06 | 7.220E-07 |
| 4860 | Y10B_A | F19B_W | T4B_A  | V24B_T | 9.1E-07 | 3.7E-06 | 1.812E-06 | 6.626E-07 |
| 4861 | Y10B_A | L11B_A | F19B_A | V24B_N | 6.7E-07 | 2.6E-06 | 1.814E-06 | 5.503E-07 |
| 4862 | G13B_A | E18B_A | L23B_Q | F19B_A | 9.3E-07 | 3.5E-06 | 1.814E-06 | 6.585E-07 |
| 4863 | G13B_A | D6B_A  | A16B_N | L23B_Q | 2.8E-07 | 3.0E-06 | 1.814E-06 | 7.419E-07 |
| 4864 | Y10B_A | G1B_R  | S9B_A  | E12B_A | 9.8E-07 | 2.3E-06 | 1.814E-06 | 3.712E-07 |
| 4865 | G13B_A | D6B_A  | V7B_A  | F19B_Q | 8.7E-07 | 4.3E-06 | 1.814E-06 | 8.234E-07 |
| 4866 | S8B_A  | G13B_W | V24B_T | T2B_A  | 1.0E-06 | 2.8E-06 | 1.815E-06 | 4.511E-07 |
| 4867 | Y10B_A | V7B_A  | F19B_W | K17B_S | 1.1E-06 | 3.5E-06 | 1.815E-06 | 5.994E-07 |
| 4868 | Y10B_A | L11B_A | I20B_S | K17B_A | 1.3E-06 | 2.6E-06 | 1.815E-06 | 3.558E-07 |
| 4869 | Y10B_A | S8B_A  | G13B_W | V24B_N | 1.1E-06 | 2.5E-06 | 1.815E-06 | 3.717E-07 |
| 4870 | G13B_A | K17B_A | F19B_W | V24B_T | 6.9E-07 | 3.6E-06 | 1.816E-06 | 7.105E-07 |
| 4871 | Y10B_A | V24B_T | T2B_A  | E12B_A | 5.8E-07 | 2.6E-06 | 1.817E-06 | 5.695E-07 |
| 4872 | S8B_A  | D6B_A  | S9B_A  | K17B_S | 9.6E-07 | 3.4E-06 | 1.818E-06 | 5.331E-07 |
| 4873 | Y10B_A | V7B_A  | F3B_A  | V24B_N | 9.6E-07 | 3.0E-06 | 1.818E-06 | 5.591E-07 |
| 4874 | Y10B_A | S9B_A  | L23B_R | T2B_A  | 9.3E-07 | 4.9E-06 | 1.819E-06 | 8.651E-07 |
| 4875 | Y10B_A | S8B_A  | F19B_Q | L23B_Q | 9.3E-07 | 3.2E-06 | 1.819E-06 | 6.432E-07 |
| 4876 | G13B_A | D6B_A  | S5B_A  | V24B_Q | 1.0E-06 | 2.8E-06 | 1.820E-06 | 5.317E-07 |
| 4877 | G13B_A | V7B_A  | L23B_Q | T2B_A  | 4.0E-07 | 3.2E-06 | 1.820E-06 | 6.412E-07 |
| 4878 | G13B_A | D6B_A  | V7B_A  | L23B_R | 9.1E-07 | 3.0E-06 | 1.820E-06 | 5.962E-07 |
| 4879 | Y10B_A | S9B_A  | V24B_T | Q14B_A | 9.2E-07 | 3.2E-06 | 1.821E-06 | 4.699E-07 |
| 4880 | Y10B_A | E18B_T | L11B_A | S9B_A  | 8.8E-07 | 2.7E-06 | 1.823E-06 | 5.103E-07 |
| 4881 | G13B_A | Y10B_A | A16B_N | L23B_R | 4.4E-07 | 3.1E-06 | 1.823E-06 | 8.408E-07 |
| 4882 | G13B_A | E18B_T | K17B_A | F19B_Q | 8.8E-07 | 3.0E-06 | 1.823E-06 | 5.394E-07 |
| 4883 | Y10B_A | D6B_A  | G13B_W | E18B_T | 1.1E-06 | 3.9E-06 | 1.825E-06 | 6.735E-07 |
| 4884 | G13B_A | Y10B_A | V24B_Q | G1B_A  | 1.2E-06 | 2.5E-06 | 1.825E-06 | 4.077E-07 |
| 4885 | G13B_A | Y10B_A | E18B_A | V24B_Q | 1.0E-06 | 2.7E-06 | 1.825E-06 | 4.266E-07 |
| 4886 | Y10B_A | I20B_T | S5B_A  | T4B_A  | 7.9E-07 | 2.9E-06 | 1.826E-06 | 5.333E-07 |
| 4887 | Y10B_A | E18B_T | L23B_Q | T2B_A  | 9.3E-07 | 2.6E-06 | 1.826E-06 | 5.310E-07 |

|      |        |        |        |        |         |         |           |           |
|------|--------|--------|--------|--------|---------|---------|-----------|-----------|
| 4888 | G13B_A | S8B_A  | G1B_R  | V24B_Q | 6.2E-07 | 3.4E-06 | 1.827E-06 | 6.651E-07 |
| 4889 | G13B_A | E18B_T | T4B_A  | K17B_S | 7.6E-07 | 3.0E-06 | 1.828E-06 | 5.373E-07 |
| 4890 | Y10B_A | V7B_A  | F19B_A | V24B_N | 9.6E-07 | 2.8E-06 | 1.828E-06 | 5.577E-07 |
| 4891 | G13B_A | Y10B_A | A16B_N | V24B_T | 3.4E-07 | 2.7E-06 | 1.829E-06 | 6.718E-07 |
| 4892 | Y10B_A | D6B_A  | G13B_W | F19B_W | 1.4E-06 | 3.3E-06 | 1.830E-06 | 4.330E-07 |
| 4893 | Y10B_A | S8B_A  | V24B_Q | E12B_A | 9.0E-07 | 2.8E-06 | 1.830E-06 | 4.943E-07 |
| 4894 | Y10B_A | F3B_A  | E18B_T | E12B_A | 1.1E-06 | 2.6E-06 | 1.830E-06 | 5.059E-07 |
| 4895 | Y10B_A | S8B_A  | L23B_R | K17B_S | 1.0E-06 | 3.0E-06 | 1.830E-06 | 5.371E-07 |
| 4896 | G13B_A | A16B_N | F19B_W | E12B_A | 2.8E-07 | 3.8E-06 | 1.832E-06 | 7.958E-07 |
| 4897 | S8B_A  | D6B_A  | G13B_W | S9B_A  | 1.2E-06 | 2.8E-06 | 1.835E-06 | 3.937E-07 |
| 4898 | G13B_A | L11B_A | L23B_R | T2B_A  | 1.3E-06 | 2.8E-06 | 1.835E-06 | 4.452E-07 |
| 4899 | Y10B_A | S8B_A  | I20B_T | S5B_A  | 1.1E-06 | 2.9E-06 | 1.835E-06 | 5.244E-07 |
| 4900 | Y10B_A | S9B_A  | L23B_R | Q14B_A | 1.1E-06 | 2.9E-06 | 1.835E-06 | 5.019E-07 |
| 4901 | Y10B_A | S8B_A  | S9B_A  | L23B_Q | 5.9E-07 | 3.6E-06 | 1.835E-06 | 6.493E-07 |
| 4902 | Y10B_A | E18B_T | K17B_S | G1B_A  | 8.0E-07 | 3.6E-06 | 1.835E-06 | 7.132E-07 |
| 4903 | Y10B_A | L11B_A | F19B_W | L23B_R | 8.1E-07 | 2.9E-06 | 1.836E-06 | 6.150E-07 |
| 4904 | Y10B_A | K17B_A | F19B_Q | V24B_N | 6.5E-07 | 3.2E-06 | 1.836E-06 | 7.158E-07 |
| 4905 | S8B_A  | D6B_A  | G1B_R  | V24B_N | 9.2E-07 | 2.8E-06 | 1.836E-06 | 4.978E-07 |
| 4906 | G13B_A | D6B_A  | F19B_W | E12B_A | 6.1E-07 | 2.8E-06 | 1.838E-06 | 5.471E-07 |
| 4907 | G13B_A | F3B_A  | A16B_N | L23B_R | 3.1E-07 | 3.1E-06 | 1.838E-06 | 8.239E-07 |
| 4908 | G13B_A | S8B_A  | I20B_N | K17B_A | 8.9E-07 | 3.5E-06 | 1.839E-06 | 6.451E-07 |
| 4909 | Y10B_A | S8B_A  | I20B_N | T4B_A  | 1.3E-06 | 2.9E-06 | 1.840E-06 | 4.684E-07 |
| 4910 | G13B_A | D6B_A  | V7B_A  | L23B_Q | 8.7E-07 | 2.7E-06 | 1.840E-06 | 5.287E-07 |
| 4911 | G13B_A | G1B_R  | S5B_A  | V24B_Q | 1.1E-06 | 2.7E-06 | 1.840E-06 | 3.979E-07 |
| 4912 | Y10B_A | T4B_A  | F19B_Q | L23B_R | 8.0E-07 | 2.7E-06 | 1.840E-06 | 5.548E-07 |
| 4913 | G13B_A | S8B_A  | F19B_A | V24B_Q | 1.1E-06 | 3.1E-06 | 1.840E-06 | 5.734E-07 |
| 4914 | G13B_A | L11B_A | T4B_A  | V24B_N | 1.1E-06 | 3.0E-06 | 1.840E-06 | 4.285E-07 |
| 4915 | G13B_A | L11B_A | G1B_R  | S9B_A  | 1.0E-06 | 2.5E-06 | 1.840E-06 | 4.147E-07 |
| 4916 | G13B_A | F3B_A  | K17B_S | G1B_A  | 1.2E-06 | 2.8E-06 | 1.840E-06 | 4.394E-07 |
| 4917 | Y10B_A | E18B_T | S9B_A  | F19B_A | 9.2E-07 | 3.7E-06 | 1.841E-06 | 7.208E-07 |
| 4918 | G13B_A | V7B_A  | A16B_N | F19B_Q | 5.1E-07 | 4.2E-06 | 1.842E-06 | 9.141E-07 |
| 4919 | Y10B_A | G13B_W | E18B_T | G1B_A  | 8.1E-07 | 3.2E-06 | 1.842E-06 | 7.090E-07 |
| 4920 | Y10B_A | D6B_A  | F19B_W | L23B_R | 8.3E-07 | 2.8E-06 | 1.842E-06 | 5.585E-07 |
| 4921 | Y10B_A | G1B_R  | K17B_S | E12B_A | 8.6E-07 | 3.0E-06 | 1.843E-06 | 5.743E-07 |
| 4922 | Y10B_A | F19B_A | V24B_N | G1B_A  | 1.0E-06 | 2.8E-06 | 1.845E-06 | 4.807E-07 |
| 4923 | G13B_A | F19B_A | V24B_Q | Q14B_A | 5.7E-07 | 3.3E-06 | 1.845E-06 | 7.786E-07 |
| 4924 | Y10B_A | A16B_N | G1B_R  | V24B_N | 5.3E-07 | 2.6E-06 | 1.847E-06 | 5.443E-07 |
| 4925 | G13B_A | V7B_A  | S5B_A  | V24B_Q | 1.1E-06 | 3.6E-06 | 1.850E-06 | 5.549E-07 |
| 4926 | Y10B_A | G13B_W | V7B_A  | E18B_T | 1.2E-06 | 2.7E-06 | 1.850E-06 | 4.466E-07 |
| 4927 | G13B_A | F3B_A  | E18B_A | F19B_Q | 7.1E-07 | 3.8E-06 | 1.850E-06 | 8.266E-07 |
| 4928 | S8B_A  | V7B_A  | A16B_N | V24B_Q | 4.7E-07 | 3.3E-06 | 1.850E-06 | 7.765E-07 |
| 4929 | G13B_A | S8B_A  | V7B_A  | L23B_Q | 1.1E-06 | 2.8E-06 | 1.850E-06 | 5.216E-07 |
| 4930 | Y10B_A | I20B_S | G1B_R  | K17B_A | 1.0E-06 | 2.5E-06 | 1.850E-06 | 4.186E-07 |
| 4931 | G13B_A | V7B_A  | E18B_T | F19B_A | 1.2E-06 | 2.8E-06 | 1.850E-06 | 4.261E-07 |
| 4932 | S8B_A  | G13B_W | S9B_A  | F19B_A | 1.2E-06 | 2.8E-06 | 1.850E-06 | 3.791E-07 |
| 4933 | G13B_A | T4B_A  | S9B_A  | K17B_S | 9.0E-07 | 3.6E-06 | 1.850E-06 | 5.763E-07 |
| 4934 | Y10B_A | S8B_A  | I20B_S | T2B_A  | 1.3E-06 | 2.7E-06 | 1.850E-06 | 3.236E-07 |
| 4935 | G13B_A | Y10B_A | F19B_W | L23B_R | 9.1E-07 | 3.0E-06 | 1.851E-06 | 6.255E-07 |
| 4936 | G13B_A | G1B_R  | Q14B_A | V24B_N | 9.3E-07 | 2.8E-06 | 1.852E-06 | 4.721E-07 |
| 4937 | G13B_A | Y10B_A | G1B_R  | V24B_Q | 7.2E-07 | 3.5E-06 | 1.852E-06 | 6.998E-07 |
| 4938 | G13B_A | D6B_A  | A16B_N | F19B_Q | 2.3E-07 | 5.5E-06 | 1.853E-06 | 1.198E-06 |
| 4939 | Y10B_A | S5B_A  | F19B_W | L23B_Q | 5.7E-07 | 5.4E-06 | 1.853E-06 | 1.058E-06 |



|      |        |        |        |        |         |         |           |           |
|------|--------|--------|--------|--------|---------|---------|-----------|-----------|
| 4940 | Y10B_A | E18B_T | T4B_A  | V24B_T | 8.7E-07 | 3.1E-06 | 1.854E-06 | 6.030E-07 |
| 4941 | Y10B_A | S8B_A  | A16B_N | I20B_S | 5.5E-07 | 3.7E-06 | 1.854E-06 | 6.845E-07 |
| 4942 | G13B_A | A16B_N | L23B_R | G1B_A  | 7.9E-07 | 3.1E-06 | 1.854E-06 | 5.453E-07 |
| 4943 | Y10B_A | G13B_W | A16B_N | E18B_T | 5.9E-07 | 3.8E-06 | 1.855E-06 | 9.305E-07 |
| 4944 | S8B_A  | G13B_W | T4B_A  | L23B_Q | 7.1E-07 | 2.7E-06 | 1.855E-06 | 5.575E-07 |
| 4945 | Y10B_A | I20B_S | Q14B_A | T2B_A  | 1.1E-06 | 2.6E-06 | 1.855E-06 | 4.478E-07 |
| 4946 | Y10B_A | F3B_A  | L11B_A | V24B_N | 1.1E-06 | 2.5E-06 | 1.855E-06 | 4.006E-07 |
| 4947 | Y10B_A | S8B_A  | F19B_W | V24B_T | 8.2E-07 | 2.7E-06 | 1.856E-06 | 4.297E-07 |
| 4948 | S8B_A  | D6B_A  | E18B_T | F19B_Q | 6.8E-07 | 3.2E-06 | 1.856E-06 | 6.678E-07 |
| 4949 | Y10B_A | V7B_A  | V24B_Q | G1B_A  | 6.3E-07 | 3.0E-06 | 1.856E-06 | 6.033E-07 |
| 4950 | Y10B_A | K17B_A | F19B_Q | L23B_Q | 5.3E-07 | 4.1E-06 | 1.856E-06 | 9.773E-07 |
| 4951 | Y10B_A | F19B_W | T2B_A  | V24B_N | 7.2E-07 | 4.2E-06 | 1.856E-06 | 8.209E-07 |
| 4952 | G13B_A | F3B_A  | T4B_A  | V24B_Q | 9.6E-07 | 3.0E-06 | 1.858E-06 | 5.210E-07 |
| 4953 | G13B_A | D6B_A  | A16B_N | K17B_S | 5.0E-07 | 3.4E-06 | 1.859E-06 | 8.489E-07 |
| 4954 | G13B_A | E18B_A | L23B_R | F19B_A | 7.9E-07 | 3.0E-06 | 1.859E-06 | 5.835E-07 |
| 4955 | Y10B_A | F19B_Q | S9B_A  | T2B_A  | 6.8E-07 | 3.1E-06 | 1.859E-06 | 6.422E-07 |
| 4956 | G13B_A | F3B_A  | E18B_T | G1B_R  | 1.0E-06 | 3.7E-06 | 1.860E-06 | 6.353E-07 |
| 4957 | S8B_A  | G13B_W | V24B_T | Q14B_A | 1.2E-06 | 2.6E-06 | 1.860E-06 | 4.321E-07 |
| 4958 | Y10B_A | D6B_A  | G1B_R  | V24B_N | 1.2E-06 | 3.1E-06 | 1.860E-06 | 5.305E-07 |
| 4959 | G13B_A | F3B_A  | L23B_Q | Q14B_A | 1.0E-06 | 2.6E-06 | 1.860E-06 | 4.223E-07 |
| 4960 | Y10B_A | D6B_A  | E18B_T | K17B_S | 1.0E-06 | 2.9E-06 | 1.860E-06 | 5.236E-07 |
| 4961 | Y10B_A | T4B_A  | L23B_R | E12B_A | 9.1E-07 | 2.6E-06 | 1.860E-06 | 4.406E-07 |
| 4962 | Y10B_A | E18B_T | S5B_A  | V24B_T | 1.0E-06 | 3.7E-06 | 1.860E-06 | 6.969E-07 |
| 4963 | G13B_A | L23B_Q | Q14B_A | G1B_A  | 1.0E-06 | 3.0E-06 | 1.860E-06 | 5.725E-07 |
| 4964 | G13B_A | T4B_A  | F19B_Q | E12B_A | 6.5E-07 | 3.3E-06 | 1.861E-06 | 7.082E-07 |
| 4965 | G13B_A | D6B_A  | S5B_A  | V24B_T | 9.2E-07 | 2.7E-06 | 1.861E-06 | 4.149E-07 |
| 4966 | Y10B_A | G13B_W | E18B_A | K17B_S | 5.8E-07 | 2.7E-06 | 1.864E-06 | 5.692E-07 |
| 4967 | Y10B_A | D6B_A  | V24B_N | G1B_A  | 1.2E-06 | 2.7E-06 | 1.865E-06 | 3.977E-07 |
| 4968 | G13B_A | V7B_A  | S5B_A  | V24B_T | 1.2E-06 | 2.6E-06 | 1.865E-06 | 3.937E-07 |
| 4969 | Y10B_A | G1B_R  | L23B_R | F19B_A | 1.4E-06 | 2.7E-06 | 1.865E-06 | 3.843E-07 |
| 4970 | G13B_A | S8B_A  | V7B_A  | V24B_Q | 1.3E-06 | 2.6E-06 | 1.865E-06 | 4.184E-07 |
| 4971 | Y10B_A | F3B_A  | G1B_R  | V24B_Q | 1.2E-06 | 2.7E-06 | 1.865E-06 | 4.209E-07 |
| 4972 | Y10B_A | V7B_A  | K17B_S | E12B_A | 1.0E-06 | 3.4E-06 | 1.865E-06 | 5.706E-07 |
| 4973 | G13B_A | E18B_T | S5B_A  | F19B_Q | 7.1E-07 | 5.0E-06 | 1.867E-06 | 1.133E-06 |
| 4974 | G13B_A | S5B_A  | K17B_S | E12B_A | 8.6E-07 | 2.9E-06 | 1.868E-06 | 4.623E-07 |
| 4975 | Y10B_A | A16B_N | E18B_T | K17B_S | 3.2E-07 | 4.1E-06 | 1.868E-06 | 1.003E-06 |
| 4976 | G13B_A | L11B_A | T4B_A  | V24B_Q | 9.6E-07 | 3.0E-06 | 1.868E-06 | 5.801E-07 |
| 4977 | G13B_A | L11B_A | E18B_A | F19B_Q | 1.0E-06 | 3.5E-06 | 1.870E-06 | 5.904E-07 |
| 4978 | Y10B_A | L11B_A | K17B_S | E12B_A | 1.2E-06 | 2.9E-06 | 1.870E-06 | 4.680E-07 |
| 4979 | G13B_A | E18B_T | G1B_R  | F19B_A | 1.1E-06 | 3.4E-06 | 1.870E-06 | 5.362E-07 |
| 4980 | G13B_A | G1B_R  | L23B_Q | Q14B_A | 1.1E-06 | 3.2E-06 | 1.870E-06 | 5.620E-07 |
| 4981 | G13B_A | Y10B_A | I20B_S | K17B_A | 1.1E-06 | 3.0E-06 | 1.870E-06 | 5.162E-07 |
| 4982 | Y10B_A | V7B_A  | A16B_N | V24B_N | 4.7E-07 | 5.0E-06 | 1.870E-06 | 9.618E-07 |
| 4983 | G13B_A | K17B_A | F19B_W | V24B_N | 8.1E-07 | 3.1E-06 | 1.871E-06 | 6.658E-07 |
| 4984 | Y10B_A | F3B_A  | F19B_W | L23B_R | 8.4E-07 | 3.5E-06 | 1.872E-06 | 6.332E-07 |
| 4985 | G13B_A | G1B_R  | T2B_A  | V24B_N | 9.5E-07 | 2.9E-06 | 1.873E-06 | 3.830E-07 |
| 4986 | G13B_A | F19B_Q | Q14B_A | E12B_A | 6.8E-07 | 4.6E-06 | 1.874E-06 | 1.136E-06 |
| 4987 | G13B_A | G1B_R  | V24B_T | T2B_A  | 8.9E-07 | 2.5E-06 | 1.875E-06 | 4.423E-07 |
| 4988 | G13B_A | F19B_A | T2B_A  | V24B_N | 1.1E-06 | 4.1E-06 | 1.875E-06 | 7.122E-07 |
| 4989 | Y10B_A | I20B_S | S5B_A  | Q14B_A | 1.3E-06 | 3.7E-06 | 1.875E-06 | 5.399E-07 |
| 4990 | G13B_A | Y10B_A | G1B_R  | V24B_N | 9.0E-07 | 3.5E-06 | 1.875E-06 | 6.688E-07 |
| 4991 | G13B_A | G1B_R  | T4B_A  | L23B_Q | 1.1E-06 | 3.6E-06 | 1.875E-06 | 6.282E-07 |

|      |        |        |        |        |         |         |           |           |
|------|--------|--------|--------|--------|---------|---------|-----------|-----------|
| 4992 | Y10B_A | L11B_A | F19B_A | V24B_Q | 1.0E-06 | 3.3E-06 | 1.875E-06 | 5.505E-07 |
| 4993 | G13B_A | T4B_A  | V24B_N | G1B_A  | 1.1E-06 | 2.6E-06 | 1.875E-06 | 3.582E-07 |
| 4994 | Y10B_A | G13B_W | F19B_W | G1B_A  | 9.5E-07 | 3.2E-06 | 1.877E-06 | 6.010E-07 |
| 4995 | Y10B_A | E18B_T | K17B_S | F19B_A | 6.3E-07 | 4.2E-06 | 1.877E-06 | 9.973E-07 |
| 4996 | Y10B_A | E18B_A | F19B_Q | E12B_A | 8.6E-07 | 3.3E-06 | 1.878E-06 | 6.606E-07 |
| 4997 | Y10B_A | F3B_A  | L23B_Q | F19B_A | 9.8E-07 | 3.2E-06 | 1.879E-06 | 5.924E-07 |
| 4998 | G13B_A | V7B_A  | L11B_A | K17B_S | 1.3E-06 | 2.8E-06 | 1.880E-06 | 3.861E-07 |
| 4999 | Y10B_A | D6B_A  | E18B_T | S9B_A  | 1.0E-06 | 2.6E-06 | 1.880E-06 | 5.217E-07 |
| 5000 | S8B_A  | G13B_W | L11B_A | E12B_A | 1.3E-06 | 2.8E-06 | 1.880E-06 | 3.942E-07 |
| 5001 | G13B_A | S5B_A  | V24B_Q | G1B_A  | 1.1E-06 | 3.0E-06 | 1.880E-06 | 6.092E-07 |
| 5002 | Y10B_A | I20B_S | T4B_A  | T2B_A  | 1.1E-06 | 2.9E-06 | 1.880E-06 | 5.227E-07 |
| 5003 | G13B_A | S5B_A  | L23B_Q | F19B_A | 8.0E-07 | 3.0E-06 | 1.880E-06 | 5.644E-07 |
| 5004 | Y10B_A | I20B_N | T4B_A  | Q14B_A | 1.1E-06 | 2.9E-06 | 1.880E-06 | 5.136E-07 |
| 5005 | S8B_A  | G13B_W | F19B_Q | T2B_A  | 9.1E-07 | 2.9E-06 | 1.881E-06 | 5.445E-07 |
| 5006 | Y10B_A | L11B_A | V24B_N | G1B_A  | 9.6E-07 | 4.1E-06 | 1.881E-06 | 7.156E-07 |
| 5007 | S8B_A  | D6B_A  | G13B_W | E18B_T | 9.1E-07 | 3.8E-06 | 1.881E-06 | 6.864E-07 |
| 5008 | G13B_A | V24B_Q | T2B_A  | G1B_A  | 8.2E-07 | 3.8E-06 | 1.881E-06 | 6.328E-07 |
| 5009 | G13B_A | S8B_A  | A16B_N | V24B_N | 6.0E-07 | 2.7E-06 | 1.882E-06 | 6.516E-07 |
| 5010 | G13B_A | L11B_A | E18B_A | L23B_Q | 8.7E-07 | 3.2E-06 | 1.883E-06 | 6.352E-07 |
| 5011 | Y10B_A | G13B_W | A16B_N | K17B_S | 7.6E-07 | 4.0E-06 | 1.883E-06 | 7.889E-07 |
| 5012 | S8B_A  | D6B_A  | I20B_S | K17B_A | 9.6E-07 | 2.7E-06 | 1.883E-06 | 4.352E-07 |
| 5013 | G13B_A | D6B_A  | A16B_N | S9B_A  | 4.5E-07 | 3.7E-06 | 1.884E-06 | 7.697E-07 |
| 5014 | Y10B_A | G13B_W | T4B_A  | V24B_T | 1.3E-06 | 3.0E-06 | 1.885E-06 | 4.120E-07 |
| 5015 | Y10B_A | F3B_A  | F19B_A | V24B_Q | 7.0E-07 | 3.7E-06 | 1.885E-06 | 6.659E-07 |
| 5016 | Y10B_A | T4B_A  | S9B_A  | L23B_Q | 1.1E-06 | 2.9E-06 | 1.885E-06 | 5.575E-07 |
| 5017 | Y10B_A | T4B_A  | L23B_Q | E12B_A | 8.2E-07 | 3.1E-06 | 1.885E-06 | 5.975E-07 |
| 5018 | Y10B_A | E18B_T | S9B_A  | G1B_A  | 1.2E-06 | 4.1E-06 | 1.885E-06 | 6.683E-07 |
| 5019 | Y10B_A | T4B_A  | S9B_A  | L23B_R | 1.4E-06 | 3.2E-06 | 1.885E-06 | 4.771E-07 |
| 5020 | S8B_A  | D6B_A  | V24B_Q | G1B_A  | 1.0E-06 | 2.7E-06 | 1.885E-06 | 4.891E-07 |
| 5021 | G13B_A | F19B_W | K17B_S | T2B_A  | 7.4E-07 | 3.0E-06 | 1.887E-06 | 5.800E-07 |
| 5022 | G13B_A | A16B_N | E18B_A | V24B_N | 3.2E-07 | 2.7E-06 | 1.887E-06 | 7.086E-07 |
| 5023 | G13B_A | F3B_A  | A16B_N | K17B_S | 5.0E-07 | 3.6E-06 | 1.887E-06 | 8.145E-07 |
| 5024 | Y10B_A | F19B_W | V24B_T | T2B_A  | 9.6E-07 | 3.4E-06 | 1.888E-06 | 6.066E-07 |
| 5025 | Y10B_A | S8B_A  | I20B_Q | Q14B_A | 8.8E-07 | 2.9E-06 | 1.889E-06 | 5.748E-07 |
| 5026 | Y10B_A | V7B_A  | E18B_T | E12B_A | 1.1E-06 | 3.6E-06 | 1.890E-06 | 5.794E-07 |
| 5027 | G13B_A | E18B_T | L11B_A | G1B_A  | 1.2E-06 | 2.9E-06 | 1.890E-06 | 4.701E-07 |
| 5028 | Y10B_A | S5B_A  | L23B_Q | E12B_A | 1.1E-06 | 3.1E-06 | 1.890E-06 | 6.112E-07 |
| 5029 | Y10B_A | S8B_A  | I20B_Q | T4B_A  | 1.1E-06 | 2.9E-06 | 1.890E-06 | 6.103E-07 |
| 5030 | S8B_A  | G13B_W | G1B_R  | E12B_A | 6.1E-07 | 3.7E-06 | 1.890E-06 | 6.748E-07 |
| 5031 | S8B_A  | G13B_W | S5B_A  | L23B_R | 1.0E-06 | 3.1E-06 | 1.890E-06 | 5.409E-07 |
| 5032 | S8B_A  | G13B_W | L23B_R | T2B_A  | 1.1E-06 | 3.3E-06 | 1.890E-06 | 5.495E-07 |
| 5033 | G13B_A | Y10B_A | F3B_A  | V24B_N | 8.1E-07 | 3.0E-06 | 1.893E-06 | 6.169E-07 |
| 5034 | G13B_A | D6B_A  | G1B_R  | K17B_S | 8.7E-07 | 3.3E-06 | 1.893E-06 | 5.520E-07 |
| 5035 | Y10B_A | A16B_N | E18B_T | S9B_A  | 5.2E-07 | 2.9E-06 | 1.894E-06 | 6.359E-07 |
| 5036 | G13B_A | L11B_A | V24B_Q | Q14B_A | 1.1E-06 | 3.2E-06 | 1.895E-06 | 5.463E-07 |
| 5037 | Y10B_A | E18B_T | V24B_T | T2B_A  | 1.2E-06 | 3.5E-06 | 1.895E-06 | 6.312E-07 |
| 5038 | Y10B_A | G13B_W | F19B_A | E12B_A | 1.1E-06 | 3.2E-06 | 1.895E-06 | 5.463E-07 |
| 5039 | Y10B_A | V24B_T | Q14B_A | E12B_A | 1.3E-06 | 2.8E-06 | 1.895E-06 | 3.706E-07 |
| 5040 | Y10B_A | E18B_A | F19B_W | K17B_S | 1.0E-06 | 3.0E-06 | 1.895E-06 | 5.296E-07 |
| 5041 | Y10B_A | F3B_A  | E18B_T | F19B_Q | 6.5E-07 | 3.5E-06 | 1.896E-06 | 7.319E-07 |
| 5042 | S8B_A  | G13B_W | F3B_A  | F19B_W | 7.6E-07 | 3.5E-06 | 1.898E-06 | 6.126E-07 |
| 5043 | Y10B_A | A16B_N | G1B_R  | F19B_Q | 3.9E-07 | 5.2E-06 | 1.898E-06 | 1.118E-06 |

|      |        |        |        |        |         |         |           |           |
|------|--------|--------|--------|--------|---------|---------|-----------|-----------|
| 5044 | G13B_A | F3B_A  | G1B_R  | F19B_W | 9.8E-07 | 3.0E-06 | 1.899E-06 | 5.580E-07 |
| 5045 | Y10B_A | A16B_N | L23B_R | G1B_A  | 4.4E-07 | 3.9E-06 | 1.900E-06 | 1.019E-06 |
| 5046 | S8B_A  | G13B_W | L11B_A | S9B_A  | 1.2E-06 | 2.6E-06 | 1.900E-06 | 4.341E-07 |
| 5047 | G13B_A | F3B_A  | V24B_Q | T2B_A  | 1.1E-06 | 2.6E-06 | 1.900E-06 | 4.267E-07 |
| 5048 | Y10B_A | I20B_N | E18B_A | K17B_A | 1.2E-06 | 2.6E-06 | 1.900E-06 | 3.839E-07 |
| 5049 | G13B_A | Y10B_A | F19B_A | V24B_T | 1.1E-06 | 3.1E-06 | 1.900E-06 | 6.266E-07 |
| 5050 | Y10B_A | D6B_A  | V7B_A  | V24B_N | 9.1E-07 | 3.5E-06 | 1.900E-06 | 6.481E-07 |
| 5051 | G13B_A | L11B_A | K17B_S | G1B_A  | 1.1E-06 | 4.1E-06 | 1.900E-06 | 7.406E-07 |
| 5052 | Y10B_A | V7B_A  | A16B_N | V24B_Q | 5.1E-07 | 3.4E-06 | 1.901E-06 | 8.997E-07 |
| 5053 | G13B_A | K17B_S | F19B_A | G1B_A  | 7.2E-07 | 4.6E-06 | 1.901E-06 | 8.551E-07 |
| 5054 | G13B_A | A16B_N | F19B_A | V24B_T | 4.5E-07 | 3.6E-06 | 1.902E-06 | 7.530E-07 |
| 5055 | Y10B_A | S5B_A  | F19B_W | V24B_T | 9.5E-07 | 4.0E-06 | 1.903E-06 | 8.910E-07 |
| 5056 | S8B_A  | G13B_W | E18B_T | G1B_A  | 9.7E-07 | 3.8E-06 | 1.903E-06 | 7.414E-07 |
| 5057 | G13B_A | F3B_A  | T4B_A  | V24B_N | 8.8E-07 | 2.8E-06 | 1.904E-06 | 5.781E-07 |
| 5058 | G13B_A | V7B_A  | E18B_T | F19B_W | 1.1E-06 | 3.5E-06 | 1.905E-06 | 7.571E-07 |
| 5059 | G13B_A | Y10B_A | L23B_Q | F19B_A | 1.0E-06 | 3.3E-06 | 1.905E-06 | 6.228E-07 |
| 5060 | G13B_A | E18B_A | G1B_R  | F19B_Q | 1.0E-06 | 2.8E-06 | 1.905E-06 | 4.740E-07 |
| 5061 | G13B_A | E18B_A | G1B_R  | K17B_S | 1.4E-06 | 3.3E-06 | 1.905E-06 | 4.740E-07 |
| 5062 | G13B_A | D6B_A  | E18B_A | L23B_R | 1.0E-06 | 3.6E-06 | 1.905E-06 | 6.684E-07 |
| 5063 | G13B_A | A16B_N | G1B_R  | K17B_S | 6.0E-07 | 3.0E-06 | 1.905E-06 | 6.716E-07 |
| 5064 | G13B_A | E18B_T | T4B_A  | E12B_A | 8.4E-07 | 2.7E-06 | 1.907E-06 | 4.647E-07 |
| 5065 | Y10B_A | F19B_W | T4B_A  | V24B_Q | 9.6E-07 | 3.7E-06 | 1.908E-06 | 5.988E-07 |
| 5066 | Y10B_A | I20B_T | Q14B_A | T2B_A  | 1.1E-06 | 2.4E-06 | 1.910E-06 | 3.824E-07 |
| 5067 | Y10B_A | G13B_W | S9B_A  | G1B_A  | 8.1E-07 | 2.8E-06 | 1.910E-06 | 4.950E-07 |
| 5068 | G13B_A | S5B_A  | F19B_W | S9B_A  | 1.1E-06 | 3.1E-06 | 1.910E-06 | 5.534E-07 |
| 5069 | Y10B_A | E18B_T | G1B_R  | E12B_A | 1.2E-06 | 3.5E-06 | 1.910E-06 | 6.265E-07 |
| 5070 | S8B_A  | G13B_W | E18B_A | K17B_S | 1.2E-06 | 3.3E-06 | 1.910E-06 | 5.794E-07 |
| 5071 | S8B_A  | D6B_A  | F19B_Q | E12B_A | 6.0E-07 | 3.7E-06 | 1.910E-06 | 9.052E-07 |
| 5072 | G13B_A | E18B_T | Q14B_A | E12B_A | 1.3E-06 | 3.6E-06 | 1.910E-06 | 5.920E-07 |
| 5073 | S8B_A  | G13B_W | F19B_W | G1B_A  | 9.3E-07 | 3.1E-06 | 1.911E-06 | 5.534E-07 |
| 5074 | G13B_A | L11B_A | L23B_Q | Q14B_A | 7.1E-07 | 3.3E-06 | 1.911E-06 | 6.067E-07 |
| 5075 | G13B_A | D6B_A  | A16B_N | E18B_T | 5.2E-07 | 4.2E-06 | 1.911E-06 | 8.616E-07 |
| 5076 | Y10B_A | S8B_A  | F19B_W | V24B_Q | 9.6E-07 | 4.5E-06 | 1.913E-06 | 7.384E-07 |
| 5077 | G13B_A | F3B_A  | S5B_A  | F19B_Q | 8.8E-07 | 3.6E-06 | 1.914E-06 | 7.111E-07 |
| 5078 | Y10B_A | G13B_W | K17B_A | L23B_Q | 1.1E-06 | 3.7E-06 | 1.915E-06 | 5.770E-07 |
| 5079 | S8B_A  | G13B_W | A16B_N | F19B_W | 6.4E-07 | 5.5E-06 | 1.915E-06 | 1.157E-06 |
| 5080 | Y10B_A | I20B_T | T4B_A  | T2B_A  | 1.3E-06 | 3.0E-06 | 1.915E-06 | 4.591E-07 |
| 5081 | G13B_A | V7B_A  | G1B_R  | S9B_A  | 1.2E-06 | 2.9E-06 | 1.915E-06 | 4.146E-07 |
| 5082 | G13B_A | K17B_A | V24B_T | E12B_A | 1.0E-06 | 4.0E-06 | 1.915E-06 | 8.035E-07 |
| 5083 | G13B_A | I20B_S | K17B_A | T2B_A  | 1.1E-06 | 3.0E-06 | 1.915E-06 | 5.412E-07 |
| 5084 | G13B_A | V7B_A  | V24B_Q | T2B_A  | 1.3E-06 | 2.5E-06 | 1.915E-06 | 3.281E-07 |
| 5085 | S8B_A  | G13B_W | E12B_A | G1B_A  | 1.3E-06 | 3.9E-06 | 1.915E-06 | 5.958E-07 |
| 5086 | G13B_A | T4B_A  | F19B_A | V24B_Q | 1.2E-06 | 2.7E-06 | 1.915E-06 | 4.246E-07 |
| 5087 | Y10B_A | I20B_T | K17B_A | Q14B_A | 1.0E-06 | 2.7E-06 | 1.915E-06 | 4.603E-07 |
| 5088 | G13B_A | S8B_A  | F3B_A  | L23B_Q | 8.0E-07 | 2.7E-06 | 1.915E-06 | 5.383E-07 |
| 5089 | G13B_A | D6B_A  | F3B_A  | L23B_R | 1.2E-06 | 3.5E-06 | 1.915E-06 | 6.459E-07 |
| 5090 | Y10B_A | T4B_A  | S9B_A  | V24B_T | 9.4E-07 | 3.2E-06 | 1.917E-06 | 4.694E-07 |
| 5091 | G13B_A | A16B_N | V24B_T | T2B_A  | 3.8E-07 | 3.1E-06 | 1.918E-06 | 9.126E-07 |
| 5092 | Y10B_A | A16B_N | S9B_A  | K17B_S | 8.5E-07 | 3.8E-06 | 1.918E-06 | 7.129E-07 |
| 5093 | Y10B_A | S8B_A  | I20B_S | T4B_A  | 1.1E-06 | 2.6E-06 | 1.920E-06 | 5.207E-07 |
| 5094 | G13B_A | S5B_A  | V24B_T | G1B_A  | 1.4E-06 | 3.2E-06 | 1.920E-06 | 4.150E-07 |
| 5095 | Y10B_A | G13B_W | F19B_Q | T2B_A  | 1.1E-06 | 3.2E-06 | 1.920E-06 | 6.296E-07 |

|      |        |        |        |        |         |         |           |           |
|------|--------|--------|--------|--------|---------|---------|-----------|-----------|
| 5096 | G13B_A | A16B_N | Q14B_A | V24B_N | 4.9E-07 | 3.1E-06 | 1.921E-06 | 7.221E-07 |
| 5097 | G13B_A | Y10B_A | V24B_T | G1B_A  | 9.6E-07 | 3.2E-06 | 1.923E-06 | 6.041E-07 |
| 5098 | G13B_A | F3B_A  | A16B_N | S9B_A  | 4.7E-07 | 3.3E-06 | 1.924E-06 | 8.116E-07 |
| 5099 | Y10B_A | S8B_A  | I20B_N | T2B_A  | 6.7E-07 | 3.0E-06 | 1.924E-06 | 5.745E-07 |
| 5100 | Y10B_A | V7B_A  | F19B_W | L23B_R | 5.7E-07 | 3.2E-06 | 1.924E-06 | 7.405E-07 |
| 5101 | Y10B_A | V7B_A  | F19B_A | V24B_Q | 1.2E-06 | 2.5E-06 | 1.925E-06 | 3.522E-07 |
| 5102 | Y10B_A | E18B_A | G1B_R  | V24B_N | 1.3E-06 | 3.0E-06 | 1.925E-06 | 3.768E-07 |
| 5103 | S8B_A  | D6B_A  | V7B_A  | V24B_Q | 1.3E-06 | 3.6E-06 | 1.925E-06 | 5.533E-07 |
| 5104 | G13B_A | V7B_A  | T4B_A  | V24B_Q | 1.1E-06 | 3.7E-06 | 1.925E-06 | 6.257E-07 |
| 5105 | G13B_A | F3B_A  | S5B_A  | V24B_T | 1.6E-06 | 2.8E-06 | 1.925E-06 | 3.985E-07 |
| 5106 | G13B_A | F3B_A  | E18B_A | K17B_S | 1.1E-06 | 3.0E-06 | 1.925E-06 | 5.785E-07 |
| 5107 | Y10B_A | F3B_A  | F19B_A | V24B_N | 8.2E-07 | 3.0E-06 | 1.926E-06 | 6.144E-07 |
| 5108 | G13B_A | Y10B_A | F3B_A  | V24B_Q | 8.2E-07 | 2.6E-06 | 1.926E-06 | 4.949E-07 |
| 5109 | G13B_A | V7B_A  | S5B_A  | V24B_N | 8.1E-07 | 4.3E-06 | 1.926E-06 | 7.404E-07 |
| 5110 | Y10B_A | V7B_A  | F19B_W | S9B_A  | 8.5E-07 | 3.3E-06 | 1.928E-06 | 6.227E-07 |
| 5111 | G13B_A | A16B_N | S5B_A  | V24B_N | 4.9E-07 | 3.3E-06 | 1.928E-06 | 7.223E-07 |
| 5112 | Y10B_A | G13B_W | S5B_A  | L23B_Q | 1.2E-06 | 3.3E-06 | 1.930E-06 | 5.488E-07 |
| 5113 | G13B_A | S8B_A  | G1B_R  | V24B_N | 1.0E-06 | 4.3E-06 | 1.930E-06 | 7.848E-07 |
| 5114 | G13B_A | L11B_A | L23B_Q | T2B_A  | 1.0E-06 | 2.8E-06 | 1.930E-06 | 4.900E-07 |
| 5115 | G13B_A | K17B_S | Q14B_A | E12B_A | 1.1E-06 | 2.9E-06 | 1.930E-06 | 4.985E-07 |
| 5116 | Y10B_A | G13B_W | T2B_A  | V24B_N | 1.1E-06 | 4.3E-06 | 1.930E-06 | 7.320E-07 |
| 5117 | S8B_A  | G13B_W | V7B_A  | F19B_W | 9.3E-07 | 3.2E-06 | 1.930E-06 | 6.688E-07 |
| 5118 | Y10B_A | I20B_T | E18B_A | K17B_A | 1.2E-06 | 2.6E-06 | 1.930E-06 | 3.948E-07 |
| 5119 | Y10B_A | F19B_Q | L23B_R | Q14B_A | 1.0E-06 | 3.0E-06 | 1.930E-06 | 5.391E-07 |
| 5120 | Y10B_A | D6B_A  | L23B_Q | G1B_A  | 1.3E-06 | 3.0E-06 | 1.930E-06 | 5.283E-07 |
| 5121 | G13B_A | S5B_A  | V24B_N | G1B_A  | 1.1E-06 | 3.1E-06 | 1.930E-06 | 5.172E-07 |
| 5122 | Y10B_A | D6B_A  | I20B_T | K17B_A | 1.4E-06 | 3.1E-06 | 1.935E-06 | 4.848E-07 |
| 5123 | Y10B_A | I20B_N | L11B_A | K17B_A | 1.1E-06 | 2.9E-06 | 1.935E-06 | 4.258E-07 |
| 5124 | G13B_A | Q14B_A | V24B_N | G1B_A  | 1.3E-06 | 4.3E-06 | 1.935E-06 | 6.976E-07 |
| 5125 | Y10B_A | S8B_A  | I20B_N | Q14B_A | 1.1E-06 | 2.9E-06 | 1.935E-06 | 5.153E-07 |
| 5126 | Y10B_A | S8B_A  | I20B_S | Q14B_A | 1.1E-06 | 3.0E-06 | 1.935E-06 | 5.092E-07 |
| 5127 | Y10B_A | S8B_A  | I20B_Q | K17B_A | 1.0E-06 | 3.2E-06 | 1.935E-06 | 6.691E-07 |
| 5128 | G13B_A | S8B_A  | I20B_S | K17B_A | 1.1E-06 | 2.7E-06 | 1.935E-06 | 5.081E-07 |
| 5129 | G13B_A | L11B_A | V24B_Q | T2B_A  | 8.1E-07 | 3.2E-06 | 1.935E-06 | 5.526E-07 |
| 5130 | Y10B_A | T4B_A  | E12B_A | V24B_N | 8.0E-07 | 2.8E-06 | 1.935E-06 | 5.194E-07 |
| 5131 | Y10B_A | G13B_W | E18B_A | S9B_A  | 1.5E-06 | 2.4E-06 | 1.935E-06 | 3.200E-07 |
| 5132 | Y10B_A | I20B_T | T4B_A  | Q14B_A | 9.3E-07 | 2.9E-06 | 1.937E-06 | 6.310E-07 |
| 5133 | G13B_A | S8B_A  | G1B_R  | L23B_Q | 7.4E-07 | 3.2E-06 | 1.937E-06 | 7.618E-07 |
| 5134 | G13B_A | E18B_T | S5B_A  | K17B_S | 7.3E-07 | 3.2E-06 | 1.938E-06 | 7.000E-07 |
| 5135 | Y10B_A | D6B_A  | G1B_R  | V24B_T | 9.9E-07 | 2.6E-06 | 1.939E-06 | 4.031E-07 |
| 5136 | G13B_A | F3B_A  | E18B_A | L23B_R | 1.4E-06 | 3.8E-06 | 1.940E-06 | 5.413E-07 |
| 5137 | G13B_A | S8B_A  | V24B_Q | G1B_A  | 1.1E-06 | 3.6E-06 | 1.940E-06 | 6.707E-07 |
| 5138 | G13B_A | V7B_A  | T4B_A  | V24B_T | 1.2E-06 | 3.7E-06 | 1.940E-06 | 5.286E-07 |
| 5139 | Y10B_A | V7B_A  | I20B_N | K17B_A | 1.1E-06 | 3.4E-06 | 1.940E-06 | 5.471E-07 |
| 5140 | Y10B_A | S8B_A  | I20B_N | S5B_A  | 1.1E-06 | 2.9E-06 | 1.940E-06 | 6.030E-07 |
| 5141 | G13B_A | E18B_A | V24B_Q | Q14B_A | 9.1E-07 | 2.7E-06 | 1.940E-06 | 5.384E-07 |
| 5142 | Y10B_A | T4B_A  | V24B_T | E12B_A | 1.3E-06 | 2.6E-06 | 1.940E-06 | 4.489E-07 |
| 5143 | S8B_A  | G13B_W | E18B_T | F19B_A | 1.0E-06 | 4.5E-06 | 1.940E-06 | 8.605E-07 |
| 5144 | Y10B_A | S8B_A  | L23B_Q | K17B_S | 5.4E-07 | 3.2E-06 | 1.942E-06 | 7.361E-07 |
| 5145 | Y10B_A | L11B_A | V24B_T | G1B_A  | 9.6E-07 | 2.8E-06 | 1.943E-06 | 4.381E-07 |
| 5146 | Y10B_A | V7B_A  | F3B_A  | L23B_R | 7.7E-07 | 3.3E-06 | 1.944E-06 | 6.513E-07 |
| 5147 | Y10B_A | G13B_W | T4B_A  | L23B_R | 1.3E-06 | 3.3E-06 | 1.945E-06 | 5.726E-07 |

|      |        |        |        |        |         |         |           |           |
|------|--------|--------|--------|--------|---------|---------|-----------|-----------|
| 5148 | Y10B_A | F19B_A | V24B_T | G1B_A  | 1.3E-06 | 3.0E-06 | 1.945E-06 | 4.442E-07 |
| 5149 | G13B_A | V7B_A  | L11B_A | F19B_W | 1.3E-06 | 3.0E-06 | 1.945E-06 | 4.310E-07 |
| 5150 | Y10B_A | I20B_Q | K17B_A | T4B_A  | 1.0E-06 | 3.4E-06 | 1.945E-06 | 6.203E-07 |
| 5151 | S8B_A  | D6B_A  | L11B_A | V24B_Q | 4.7E-07 | 3.9E-06 | 1.948E-06 | 6.836E-07 |
| 5152 | Y10B_A | F3B_A  | A16B_N | V24B_T | 5.5E-07 | 3.9E-06 | 1.948E-06 | 9.392E-07 |
| 5153 | Y10B_A | S5B_A  | L23B_R | E12B_A | 1.2E-06 | 2.9E-06 | 1.950E-06 | 5.135E-07 |
| 5154 | S8B_A  | D6B_A  | K17B_S | E12B_A | 1.3E-06 | 3.1E-06 | 1.950E-06 | 4.536E-07 |
| 5155 | S8B_A  | D6B_A  | L23B_Q | G1B_A  | 1.2E-06 | 3.4E-06 | 1.950E-06 | 6.541E-07 |
| 5156 | G13B_A | G1B_R  | T4B_A  | F19B_Q | 1.0E-06 | 3.4E-06 | 1.950E-06 | 6.304E-07 |
| 5157 | Y10B_A | E18B_T | F19B_A | E12B_A | 9.4E-07 | 3.2E-06 | 1.952E-06 | 6.548E-07 |
| 5158 | Y10B_A | V7B_A  | A16B_N | F19B_Q | 3.9E-07 | 5.0E-06 | 1.953E-06 | 1.144E-06 |
| 5159 | G13B_A | Y10B_A | E18B_T | F19B_W | 7.8E-07 | 3.1E-06 | 1.954E-06 | 6.995E-07 |
| 5160 | Y10B_A | A16B_N | G1B_R  | V24B_T | 5.3E-07 | 3.3E-06 | 1.954E-06 | 7.452E-07 |
| 5161 | Y10B_A | L11B_A | F19B_W | S9B_A  | 1.1E-06 | 3.2E-06 | 1.955E-06 | 5.781E-07 |
| 5162 | Y10B_A | L23B_R | F19B_A | G1B_A  | 1.2E-06 | 3.1E-06 | 1.955E-06 | 4.839E-07 |
| 5163 | Y10B_A | S5B_A  | V24B_T | E12B_A | 1.5E-06 | 3.4E-06 | 1.955E-06 | 4.673E-07 |
| 5164 | G13B_A | Y10B_A | K17B_S | E12B_A | 1.2E-06 | 3.3E-06 | 1.955E-06 | 5.306E-07 |
| 5165 | G13B_A | L11B_A | S5B_A  | L23B_Q | 1.2E-06 | 3.3E-06 | 1.955E-06 | 6.143E-07 |
| 5166 | G13B_A | Y10B_A | F19B_A | V24B_Q | 1.3E-06 | 3.1E-06 | 1.955E-06 | 4.571E-07 |
| 5167 | Y10B_A | S9B_A  | E12B_A | G1B_A  | 1.2E-06 | 2.8E-06 | 1.955E-06 | 3.677E-07 |
| 5168 | Y10B_A | E18B_A | G1B_R  | F19B_Q | 8.7E-07 | 4.1E-06 | 1.956E-06 | 8.965E-07 |
| 5169 | S8B_A  | G13B_W | A16B_N | E18B_T | 6.0E-07 | 3.3E-06 | 1.957E-06 | 7.964E-07 |
| 5170 | Y10B_A | A16B_N | F19B_Q | E12B_A | 5.4E-07 | 5.5E-06 | 1.958E-06 | 1.185E-06 |
| 5171 | Y10B_A | G13B_W | L11B_A | E12B_A | 1.0E-06 | 2.5E-06 | 1.960E-06 | 3.817E-07 |
| 5172 | S8B_A  | G13B_W | T4B_A  | V24B_T | 1.4E-06 | 3.8E-06 | 1.960E-06 | 6.660E-07 |
| 5173 | G13B_A | D6B_A  | E18B_A | V24B_T | 1.2E-06 | 3.5E-06 | 1.960E-06 | 5.305E-07 |
| 5174 | G13B_A | V24B_T | T2B_A  | G1B_A  | 1.3E-06 | 3.1E-06 | 1.960E-06 | 4.957E-07 |
| 5175 | G13B_A | S8B_A  | V7B_A  | V24B_T | 1.1E-06 | 3.1E-06 | 1.960E-06 | 4.627E-07 |
| 5176 | G13B_A | F3B_A  | E18B_T | G1B_A  | 1.4E-06 | 3.4E-06 | 1.960E-06 | 4.500E-07 |
| 5177 | G13B_A | S5B_A  | S9B_A  | E12B_A | 1.5E-06 | 3.1E-06 | 1.960E-06 | 5.185E-07 |
| 5178 | G13B_A | G1B_R  | S9B_A  | F19B_A | 1.5E-06 | 2.4E-06 | 1.960E-06 | 2.761E-07 |
| 5179 | G13B_A | G1B_R  | S5B_A  | L23B_R | 1.2E-06 | 3.6E-06 | 1.960E-06 | 6.589E-07 |
| 5180 | G13B_A | V7B_A  | T4B_A  | V24B_N | 8.5E-07 | 3.1E-06 | 1.962E-06 | 5.701E-07 |
| 5181 | Y10B_A | S8B_A  | G13B_W | L23B_R | 1.3E-06 | 2.7E-06 | 1.965E-06 | 3.746E-07 |
| 5182 | G13B_A | E18B_T | F19B_W | Q14B_A | 1.0E-06 | 3.2E-06 | 1.965E-06 | 6.385E-07 |
| 5183 | G13B_A | D6B_A  | F3B_A  | K17B_S | 1.4E-06 | 2.7E-06 | 1.965E-06 | 3.760E-07 |
| 5184 | S8B_A  | V7B_A  | F3B_A  | V24B_N | 1.0E-06 | 3.0E-06 | 1.965E-06 | 5.470E-07 |
| 5185 | G13B_A | S8B_A  | V7B_A  | V24B_N | 1.1E-06 | 2.7E-06 | 1.965E-06 | 4.534E-07 |
| 5186 | G13B_A | F19B_W | K17B_S | Q14B_A | 9.1E-07 | 2.9E-06 | 1.966E-06 | 5.402E-07 |
| 5187 | Y10B_A | I20B_S | E18B_A | K17B_A | 8.2E-07 | 3.2E-06 | 1.966E-06 | 6.000E-07 |
| 5188 | G13B_A | A16B_N | E18B_A | F19B_Q | 4.0E-07 | 3.3E-06 | 1.969E-06 | 9.356E-07 |
| 5189 | G13B_A | A16B_N | E18B_T | L11B_A | 5.7E-07 | 3.5E-06 | 1.969E-06 | 9.570E-07 |
| 5190 | G13B_A | S8B_A  | E18B_T | E12B_A | 1.1E-06 | 3.4E-06 | 1.970E-06 | 6.799E-07 |
| 5191 | G13B_A | K17B_A | F19B_W | V24B_Q | 1.1E-06 | 3.1E-06 | 1.970E-06 | 6.473E-07 |
| 5192 | G13B_A | Y10B_A | L11B_A | V24B_Q | 1.3E-06 | 2.8E-06 | 1.970E-06 | 4.943E-07 |
| 5193 | G13B_A | V7B_A  | L23B_R | F19B_A | 1.1E-06 | 3.1E-06 | 1.970E-06 | 5.545E-07 |
| 5194 | Y10B_A | E18B_T | T4B_A  | L23B_Q | 9.0E-07 | 3.4E-06 | 1.970E-06 | 7.284E-07 |
| 5195 | S8B_A  | D6B_A  | L23B_Q | F19B_A | 1.1E-06 | 3.5E-06 | 1.970E-06 | 7.064E-07 |
| 5196 | G13B_A | G1B_R  | T4B_A  | L23B_R | 1.1E-06 | 3.1E-06 | 1.970E-06 | 4.402E-07 |
| 5197 | Y10B_A | E18B_A | F19B_A | V24B_N | 1.0E-06 | 4.4E-06 | 1.970E-06 | 7.685E-07 |
| 5198 | Y10B_A | S8B_A  | I20B_S | S5B_A  | 8.3E-07 | 2.9E-06 | 1.972E-06 | 5.828E-07 |
| 5199 | G13B_A | S5B_A  | F19B_A | V24B_N | 9.6E-07 | 3.7E-06 | 1.973E-06 | 8.303E-07 |

|      |        |        |        |        |         |         |           |           |
|------|--------|--------|--------|--------|---------|---------|-----------|-----------|
| 5200 | G13B_A | T4B_A  | L23B_Q | F19B_A | 9.8E-07 | 3.3E-06 | 1.973E-06 | 6.632E-07 |
| 5201 | G13B_A | L23B_Q | F19B_A | T2B_A  | 1.0E-06 | 4.4E-06 | 1.975E-06 | 8.644E-07 |
| 5202 | G13B_A | G1B_R  | T4B_A  | V24B_Q | 1.5E-06 | 2.7E-06 | 1.975E-06 | 3.275E-07 |
| 5203 | Y10B_A | V7B_A  | F19B_A | V24B_T | 1.4E-06 | 2.8E-06 | 1.975E-06 | 3.596E-07 |
| 5204 | G13B_A | V7B_A  | L23B_Q | Q14B_A | 1.2E-06 | 3.3E-06 | 1.975E-06 | 6.298E-07 |
| 5205 | G13B_A | S8B_A  | L23B_Q | G1B_A  | 1.4E-06 | 3.0E-06 | 1.975E-06 | 4.767E-07 |
| 5206 | G13B_A | F19B_A | V24B_T | Q14B_A | 1.3E-06 | 3.5E-06 | 1.975E-06 | 5.129E-07 |
| 5207 | Y10B_A | F19B_W | K17B_S | G1B_A  | 8.3E-07 | 3.6E-06 | 1.977E-06 | 6.620E-07 |
| 5208 | G13B_A | F19B_A | V24B_T | T2B_A  | 7.9E-07 | 3.2E-06 | 1.979E-06 | 6.639E-07 |
| 5209 | G13B_A | V7B_A  | K17B_S | F19B_A | 9.8E-07 | 3.4E-06 | 1.979E-06 | 6.818E-07 |
| 5210 | G13B_A | S8B_A  | E18B_A | V24B_Q | 1.0E-06 | 3.0E-06 | 1.980E-06 | 4.675E-07 |
| 5211 | Y10B_A | V7B_A  | G1B_R  | L23B_Q | 1.3E-06 | 3.5E-06 | 1.980E-06 | 6.246E-07 |
| 5212 | G13B_A | V7B_A  | E18B_T | L11B_A | 1.0E-06 | 4.0E-06 | 1.980E-06 | 7.127E-07 |
| 5213 | Y10B_A | D6B_A  | F19B_A | V24B_N | 1.1E-06 | 3.2E-06 | 1.980E-06 | 5.396E-07 |
| 5214 | Y10B_A | L11B_A | V24B_Q | G1B_A  | 1.5E-06 | 3.3E-06 | 1.980E-06 | 4.549E-07 |
| 5215 | Y10B_A | K17B_S | F19B_A | E12B_A | 8.5E-07 | 4.5E-06 | 1.981E-06 | 8.226E-07 |
| 5216 | G13B_A | F3B_A  | A16B_N | E18B_T | 4.3E-07 | 5.0E-06 | 1.982E-06 | 1.076E-06 |
| 5217 | G13B_A | V7B_A  | F3B_A  | F19B_Q | 8.6E-07 | 3.5E-06 | 1.983E-06 | 7.812E-07 |
| 5218 | Y10B_A | S5B_A  | L23B_R | K17B_S | 1.0E-06 | 3.5E-06 | 1.985E-06 | 7.051E-07 |
| 5219 | S8B_A  | D6B_A  | E18B_T | E12B_A | 1.3E-06 | 4.0E-06 | 1.985E-06 | 6.133E-07 |
| 5220 | Y10B_A | V7B_A  | L23B_Q | G1B_A  | 1.0E-06 | 3.9E-06 | 1.985E-06 | 6.976E-07 |
| 5221 | Y10B_A | E18B_A | K17B_S | E12B_A | 1.3E-06 | 2.8E-06 | 1.985E-06 | 4.380E-07 |
| 5222 | G13B_A | L11B_A | V24B_T | Q14B_A | 1.3E-06 | 2.5E-06 | 1.985E-06 | 3.281E-07 |
| 5223 | G13B_A | S8B_A  | F3B_A  | L23B_R | 1.1E-06 | 4.3E-06 | 1.985E-06 | 7.110E-07 |
| 5224 | Y10B_A | V7B_A  | V24B_T | G1B_A  | 1.1E-06 | 3.1E-06 | 1.985E-06 | 4.848E-07 |
| 5225 | G13B_A | E18B_A | F19B_W | E12B_A | 9.9E-07 | 4.3E-06 | 1.985E-06 | 8.567E-07 |
| 5226 | G13B_A | Y10B_A | L11B_A | V24B_N | 9.2E-07 | 3.0E-06 | 1.986E-06 | 5.593E-07 |
| 5227 | G13B_A | F3B_A  | L11B_A | F19B_Q | 8.7E-07 | 3.8E-06 | 1.988E-06 | 7.877E-07 |
| 5228 | Y10B_A | S5B_A  | F19B_Q | S9B_A  | 8.7E-07 | 3.5E-06 | 1.988E-06 | 7.154E-07 |
| 5229 | G13B_A | K17B_A | F19B_Q | S9B_A  | 9.8E-07 | 3.9E-06 | 1.989E-06 | 6.965E-07 |
| 5230 | G13B_A | S8B_A  | V24B_T | G1B_A  | 1.3E-06 | 3.2E-06 | 1.990E-06 | 5.562E-07 |
| 5231 | Y10B_A | D6B_A  | I20B_N | K17B_A | 1.2E-06 | 3.1E-06 | 1.990E-06 | 6.060E-07 |
| 5232 | Y10B_A | G13B_W | F3B_A  | K17B_S | 1.1E-06 | 3.5E-06 | 1.990E-06 | 6.382E-07 |
| 5233 | Y10B_A | K17B_A | S9B_A  | V24B_Q | 1.1E-06 | 3.5E-06 | 1.990E-06 | 6.017E-07 |
| 5234 | S8B_A  | G13B_W | K17B_A | V24B_N | 1.1E-06 | 2.8E-06 | 1.990E-06 | 5.036E-07 |
| 5235 | Y10B_A | V7B_A  | E18B_A | V24B_N | 1.0E-06 | 3.2E-06 | 1.990E-06 | 5.389E-07 |
| 5236 | G13B_A | D6B_A  | L23B_Q | Q14B_A | 7.3E-07 | 3.0E-06 | 1.991E-06 | 5.282E-07 |
| 5237 | G13B_A | Y10B_A | V7B_A  | L23B_Q | 8.4E-07 | 3.7E-06 | 1.992E-06 | 7.761E-07 |
| 5238 | Y10B_A | V7B_A  | A16B_N | V24B_T | 2.7E-07 | 3.9E-06 | 1.992E-06 | 9.587E-07 |
| 5239 | S8B_A  | D6B_A  | F19B_W | L23B_R | 8.7E-07 | 3.2E-06 | 1.993E-06 | 5.847E-07 |
| 5240 | G13B_A | F3B_A  | L11B_A | K17B_S | 1.0E-06 | 3.5E-06 | 1.995E-06 | 6.724E-07 |
| 5241 | Y10B_A | F3B_A  | L11B_A | L23B_Q | 9.0E-07 | 3.5E-06 | 1.995E-06 | 6.992E-07 |
| 5242 | G13B_A | V7B_A  | S9B_A  | F19B_A | 1.6E-06 | 2.5E-06 | 1.995E-06 | 2.762E-07 |
| 5243 | G13B_A | L11B_A | Q14B_A | V24B_N | 1.2E-06 | 3.0E-06 | 1.995E-06 | 5.633E-07 |
| 5244 | Y10B_A | G13B_W | E18B_A | F19B_W | 1.1E-06 | 2.9E-06 | 1.995E-06 | 5.365E-07 |
| 5245 | G13B_A | V7B_A  | E18B_A | F19B_Q | 5.4E-07 | 4.3E-06 | 1.995E-06 | 9.634E-07 |
| 5246 | G13B_A | K17B_A | L23B_R | E12B_A | 1.2E-06 | 3.4E-06 | 1.995E-06 | 6.533E-07 |
| 5247 | Y10B_A | G13B_W | L23B_R | T2B_A  | 1.2E-06 | 3.3E-06 | 1.995E-06 | 5.624E-07 |
| 5248 | Y10B_A | G13B_W | E12B_A | G1B_A  | 1.0E-06 | 3.3E-06 | 1.995E-06 | 6.186E-07 |
| 5249 | Y10B_A | G1B_R  | F19B_A | V24B_T | 1.2E-06 | 3.4E-06 | 1.995E-06 | 6.074E-07 |
| 5250 | G13B_A | Y10B_A | V7B_A  | L23B_R | 1.1E-06 | 2.8E-06 | 1.995E-06 | 5.073E-07 |
| 5251 | Y10B_A | F19B_A | V24B_Q | G1B_A  | 9.0E-07 | 3.0E-06 | 1.995E-06 | 4.617E-07 |

|      |        |        |        |        |         |         |           |           |
|------|--------|--------|--------|--------|---------|---------|-----------|-----------|
| 5252 | G13B_A | K17B_S | T2B_A  | E12B_A | 1.4E-06 | 2.9E-06 | 1.995E-06 | 4.639E-07 |
| 5253 | G13B_A | S8B_A  | L23B_R | F19B_A | 9.1E-07 | 3.5E-06 | 1.996E-06 | 6.984E-07 |
| 5254 | G13B_A | L11B_A | S5B_A  | V24B_N | 9.5E-07 | 4.3E-06 | 1.997E-06 | 7.948E-07 |
| 5255 | G13B_A | E18B_T | F19B_W | T4B_A  | 9.6E-07 | 4.5E-06 | 1.998E-06 | 8.424E-07 |
| 5256 | G13B_A | V7B_A  | E18B_T | G1B_A  | 8.6E-07 | 3.2E-06 | 1.998E-06 | 6.320E-07 |
| 5257 | G13B_A | F19B_W | S9B_A  | Q14B_A | 1.4E-06 | 2.9E-06 | 2.000E-06 | 4.168E-07 |
| 5258 | S8B_A  | D6B_A  | G1B_R  | V24B_Q | 1.1E-06 | 3.2E-06 | 2.000E-06 | 5.016E-07 |
| 5259 | G13B_A | S5B_A  | F19B_W | K17B_S | 1.0E-06 | 4.1E-06 | 2.000E-06 | 8.227E-07 |
| 5260 | G13B_A | F3B_A  | V24B_Q | Q14B_A | 1.0E-06 | 3.1E-06 | 2.000E-06 | 5.831E-07 |
| 5261 | Y10B_A | D6B_A  | I20B_S | K17B_A | 1.0E-06 | 3.2E-06 | 2.000E-06 | 6.026E-07 |
| 5262 | G13B_A | T4B_A  | L23B_R | F19B_A | 1.5E-06 | 3.3E-06 | 2.000E-06 | 4.834E-07 |
| 5263 | Y10B_A | F3B_A  | L11B_A | L23B_R | 1.3E-06 | 3.3E-06 | 2.000E-06 | 5.341E-07 |
| 5264 | G13B_A | K17B_A | L23B_Q | E12B_A | 9.6E-07 | 3.5E-06 | 2.001E-06 | 7.593E-07 |
| 5265 | Y10B_A | F19B_W | L23B_R | G1B_A  | 7.2E-07 | 3.4E-06 | 2.001E-06 | 6.573E-07 |
| 5266 | G13B_A | T4B_A  | V24B_T | G1B_A  | 9.1E-07 | 3.6E-06 | 2.001E-06 | 6.138E-07 |
| 5267 | Y10B_A | A16B_N | L11B_A | V24B_T | 5.5E-07 | 4.0E-06 | 2.003E-06 | 8.303E-07 |
| 5268 | G13B_A | T4B_A  | V24B_Q | G1B_A  | 1.1E-06 | 3.6E-06 | 2.005E-06 | 5.862E-07 |
| 5269 | S8B_A  | V7B_A  | F3B_A  | L23B_Q | 1.2E-06 | 3.3E-06 | 2.005E-06 | 5.336E-07 |
| 5270 | G13B_A | G1B_R  | L23B_R | Q14B_A | 9.9E-07 | 3.1E-06 | 2.005E-06 | 6.160E-07 |
| 5271 | G13B_A | E18B_T | S9B_A  | T2B_A  | 1.2E-06 | 3.2E-06 | 2.005E-06 | 5.434E-07 |
| 5272 | G13B_A | S8B_A  | E18B_T | S9B_A  | 1.0E-06 | 3.2E-06 | 2.005E-06 | 5.880E-07 |
| 5273 | Y10B_A | V7B_A  | E18B_A | V24B_Q | 1.0E-06 | 3.0E-06 | 2.005E-06 | 5.753E-07 |
| 5274 | Y10B_A | V7B_A  | G1B_R  | L23B_R | 1.0E-06 | 3.8E-06 | 2.005E-06 | 6.411E-07 |
| 5275 | G13B_A | L11B_A | S9B_A  | F19B_A | 1.2E-06 | 2.7E-06 | 2.005E-06 | 3.663E-07 |
| 5276 | Y10B_A | F3B_A  | A16B_N | F19B_Q | 4.9E-07 | 3.4E-06 | 2.008E-06 | 8.620E-07 |
| 5277 | Y10B_A | F3B_A  | A16B_N | V24B_N | 4.6E-07 | 4.3E-06 | 2.008E-06 | 9.616E-07 |
| 5278 | G13B_A | Y10B_A | A16B_N | L23B_Q | 3.6E-07 | 3.5E-06 | 2.009E-06 | 1.023E-06 |
| 5279 | G13B_A | F3B_A  | V24B_T | T2B_A  | 1.4E-06 | 3.1E-06 | 2.010E-06 | 4.424E-07 |
| 5280 | S8B_A  | G13B_W | K17B_S | Q14B_A | 1.0E-06 | 3.0E-06 | 2.010E-06 | 5.911E-07 |
| 5281 | G13B_A | V7B_A  | T4B_A  | L23B_R | 1.3E-06 | 2.6E-06 | 2.010E-06 | 3.640E-07 |
| 5282 | Y10B_A | D6B_A  | F3B_A  | L23B_Q | 1.1E-06 | 3.5E-06 | 2.010E-06 | 6.439E-07 |
| 5283 | Y10B_A | E18B_A | G1B_R  | V24B_Q | 1.4E-06 | 2.6E-06 | 2.010E-06 | 3.417E-07 |
| 5284 | Y10B_A | E18B_A | S9B_A  | K17B_S | 1.2E-06 | 3.4E-06 | 2.010E-06 | 5.524E-07 |
| 5285 | Y10B_A | L11B_A | F19B_W | K17B_S | 9.1E-07 | 3.6E-06 | 2.010E-06 | 7.517E-07 |
| 5286 | G13B_A | G1B_R  | K17B_A | V24B_Q | 1.2E-06 | 3.1E-06 | 2.010E-06 | 5.812E-07 |
| 5287 | Y10B_A | V7B_A  | G1B_R  | K17B_S | 1.3E-06 | 3.1E-06 | 2.010E-06 | 5.515E-07 |
| 5288 | G13B_A | E18B_A | T4B_A  | V24B_Q | 1.4E-06 | 3.0E-06 | 2.010E-06 | 4.376E-07 |
| 5289 | G13B_A | D6B_A  | A16B_N | V24B_T | 4.6E-07 | 4.2E-06 | 2.011E-06 | 8.669E-07 |
| 5290 | Y10B_A | G13B_W | F3B_A  | F19B_W | 9.7E-07 | 3.7E-06 | 2.013E-06 | 7.444E-07 |
| 5291 | G13B_A | A16B_N | V24B_T | Q14B_A | 6.7E-07 | 3.4E-06 | 2.013E-06 | 7.911E-07 |
| 5292 | Y10B_A | A16B_N | F19B_W | S9B_A  | 5.7E-07 | 3.5E-06 | 2.013E-06 | 9.954E-07 |
| 5293 | G13B_A | V7B_A  | S9B_A  | G1B_A  | 8.5E-07 | 2.9E-06 | 2.013E-06 | 5.036E-07 |
| 5294 | S8B_A  | D6B_A  | G1B_R  | L23B_Q | 8.7E-07 | 3.7E-06 | 2.014E-06 | 7.353E-07 |
| 5295 | S8B_A  | D6B_A  | A16B_N | V24B_T | 4.1E-07 | 3.7E-06 | 2.014E-06 | 1.123E-06 |
| 5296 | Y10B_A | D6B_A  | L23B_Q | F19B_A | 1.3E-06 | 3.0E-06 | 2.015E-06 | 5.556E-07 |
| 5297 | Y10B_A | E18B_T | L23B_R | Q14B_A | 1.0E-06 | 5.1E-06 | 2.015E-06 | 8.362E-07 |
| 5298 | G13B_A | E18B_T | F19B_W | T2B_A  | 1.0E-06 | 3.8E-06 | 2.015E-06 | 7.213E-07 |
| 5299 | Y10B_A | I20B_T | S5B_A  | T2B_A  | 1.4E-06 | 2.9E-06 | 2.015E-06 | 4.499E-07 |
| 5300 | G13B_A | F3B_A  | G1B_R  | S9B_A  | 1.2E-06 | 2.9E-06 | 2.015E-06 | 4.522E-07 |
| 5301 | S8B_A  | V7B_A  | F3B_A  | V24B_T | 1.4E-06 | 3.0E-06 | 2.015E-06 | 4.171E-07 |
| 5302 | Y10B_A | G13B_W | V7B_A  | F19B_W | 1.1E-06 | 4.2E-06 | 2.015E-06 | 7.365E-07 |
| 5303 | Y10B_A | S8B_A  | E18B_T | L23B_R | 9.0E-07 | 3.9E-06 | 2.015E-06 | 7.982E-07 |

|      |        |        |        |        |         |         |           |           |
|------|--------|--------|--------|--------|---------|---------|-----------|-----------|
| 5304 | G13B_A | L11B_A | S9B_A  | G1B_A  | 1.3E-06 | 3.1E-06 | 2.015E-06 | 3.884E-07 |
| 5305 | Y10B_A | V24B_Q | T2B_A  | E12B_A | 1.1E-06 | 4.4E-06 | 2.015E-06 | 7.058E-07 |
| 5306 | G13B_A | Y10B_A | L11B_A | L23B_Q | 1.1E-06 | 3.5E-06 | 2.015E-06 | 5.696E-07 |
| 5307 | Y10B_A | F3B_A  | G1B_R  | V24B_T | 1.4E-06 | 3.8E-06 | 2.015E-06 | 5.669E-07 |
| 5308 | Y10B_A | D6B_A  | A16B_N | V24B_N | 7.6E-07 | 3.0E-06 | 2.016E-06 | 7.632E-07 |
| 5309 | Y10B_A | V7B_A  | F19B_Q | E12B_A | 7.6E-07 | 3.7E-06 | 2.017E-06 | 8.773E-07 |
| 5310 | G13B_A | V7B_A  | A16B_N | K17B_S | 4.3E-07 | 4.3E-06 | 2.017E-06 | 9.873E-07 |
| 5311 | G13B_A | V7B_A  | F19B_Q | G1B_A  | 7.3E-07 | 3.9E-06 | 2.017E-06 | 7.535E-07 |
| 5312 | G13B_A | A16B_N | T4B_A  | L23B_Q | 5.2E-07 | 3.2E-06 | 2.018E-06 | 8.570E-07 |
| 5313 | G13B_A | K17B_A | F19B_W | L23B_R | 9.8E-07 | 3.4E-06 | 2.019E-06 | 7.054E-07 |
| 5314 | Y10B_A | F3B_A  | F19B_W | S9B_A  | 1.1E-06 | 3.6E-06 | 2.020E-06 | 5.578E-07 |
| 5315 | Y10B_A | D6B_A  | G1B_R  | L23B_R | 1.1E-06 | 3.1E-06 | 2.020E-06 | 5.979E-07 |
| 5316 | Y10B_A | D6B_A  | F3B_A  | V24B_Q | 9.1E-07 | 3.2E-06 | 2.020E-06 | 5.539E-07 |
| 5317 | G13B_A | Y10B_A | G1B_R  | L23B_Q | 1.3E-06 | 3.6E-06 | 2.020E-06 | 5.569E-07 |
| 5318 | G13B_A | E18B_A | S5B_A  | V24B_N | 1.0E-06 | 2.7E-06 | 2.020E-06 | 4.948E-07 |
| 5319 | Y10B_A | G13B_W | A16B_N | S9B_A  | 5.1E-07 | 3.3E-06 | 2.020E-06 | 7.427E-07 |
| 5320 | S8B_A  | D6B_A  | V24B_T | G1B_A  | 1.2E-06 | 3.2E-06 | 2.020E-06 | 5.012E-07 |
| 5321 | S8B_A  | G13B_W | S9B_A  | G1B_A  | 8.5E-07 | 3.8E-06 | 2.022E-06 | 7.389E-07 |
| 5322 | Y10B_A | F3B_A  | V24B_T | G1B_A  | 9.6E-07 | 3.6E-06 | 2.023E-06 | 5.912E-07 |
| 5323 | Y10B_A | G13B_W | K17B_A | V24B_N | 1.3E-06 | 2.8E-06 | 2.025E-06 | 3.810E-07 |
| 5324 | G13B_A | G1B_R  | L23B_R | T2B_A  | 1.3E-06 | 2.9E-06 | 2.025E-06 | 4.128E-07 |
| 5325 | G13B_A | S8B_A  | E18B_A | V24B_N | 1.2E-06 | 2.7E-06 | 2.025E-06 | 4.734E-07 |
| 5326 | G13B_A | F19B_W | T4B_A  | S9B_A  | 1.0E-06 | 3.2E-06 | 2.025E-06 | 5.139E-07 |
| 5327 | G13B_A | E18B_A | T2B_A  | V24B_N | 1.0E-06 | 3.2E-06 | 2.025E-06 | 6.008E-07 |
| 5328 | Y10B_A | G13B_W | L11B_A | F19B_W | 1.1E-06 | 2.7E-06 | 2.025E-06 | 4.399E-07 |
| 5329 | Y10B_A | G13B_W | T4B_A  | K17B_S | 1.0E-06 | 3.5E-06 | 2.025E-06 | 5.973E-07 |
| 5330 | Y10B_A | G13B_W | K17B_A | V24B_Q | 1.3E-06 | 2.6E-06 | 2.025E-06 | 4.667E-07 |
| 5331 | G13B_A | A16B_N | L23B_R | T2B_A  | 6.9E-07 | 4.1E-06 | 2.027E-06 | 8.615E-07 |
| 5332 | G13B_A | K17B_A | F19B_W | L23B_Q | 7.0E-07 | 4.1E-06 | 2.027E-06 | 9.322E-07 |
| 5333 | G13B_A | D6B_A  | Q14B_A | V24B_N | 8.7E-07 | 3.9E-06 | 2.029E-06 | 6.894E-07 |
| 5334 | Y10B_A | F19B_W | S9B_A  | G1B_A  | 9.9E-07 | 3.1E-06 | 2.030E-06 | 5.868E-07 |
| 5335 | G13B_A | F3B_A  | T2B_A  | V24B_N | 1.0E-06 | 4.1E-06 | 2.030E-06 | 6.860E-07 |
| 5336 | Y10B_A | V7B_A  | L11B_A | V24B_T | 1.6E-06 | 3.0E-06 | 2.030E-06 | 3.757E-07 |
| 5337 | G13B_A | F19B_A | Q14B_A | V24B_N | 1.2E-06 | 3.7E-06 | 2.030E-06 | 7.692E-07 |
| 5338 | Y10B_A | S8B_A  | E12B_A | V24B_N | 1.2E-06 | 3.4E-06 | 2.030E-06 | 5.212E-07 |
| 5339 | G13B_A | D6B_A  | G1B_R  | S9B_A  | 1.2E-06 | 2.9E-06 | 2.030E-06 | 4.780E-07 |
| 5340 | G13B_A | D6B_A  | A16B_N | L23B_R | 5.1E-07 | 3.4E-06 | 2.033E-06 | 8.333E-07 |
| 5341 | G13B_A | Y10B_A | V7B_A  | V24B_N | 1.1E-06 | 3.0E-06 | 2.035E-06 | 4.760E-07 |
| 5342 | S8B_A  | G13B_W | A16B_N | E12B_A | 2.3E-07 | 5.9E-06 | 2.035E-06 | 1.424E-06 |
| 5343 | Y10B_A | D6B_A  | V7B_A  | V24B_T | 1.3E-06 | 2.7E-06 | 2.035E-06 | 3.376E-07 |
| 5344 | Y10B_A | V7B_A  | G1B_R  | V24B_T | 1.2E-06 | 3.2E-06 | 2.035E-06 | 5.008E-07 |
| 5345 | Y10B_A | F3B_A  | F19B_A | V24B_T | 1.2E-06 | 3.7E-06 | 2.035E-06 | 5.797E-07 |
| 5346 | Y10B_A | V7B_A  | E18B_A | L23B_Q | 1.3E-06 | 4.0E-06 | 2.035E-06 | 7.527E-07 |
| 5347 | Y10B_A | E18B_T | E12B_A | G1B_A  | 1.1E-06 | 4.2E-06 | 2.035E-06 | 6.961E-07 |
| 5348 | Y10B_A | E18B_T | T4B_A  | L23B_R | 1.1E-06 | 3.0E-06 | 2.035E-06 | 5.650E-07 |
| 5349 | S8B_A  | G13B_W | K17B_A | V24B_Q | 1.3E-06 | 2.8E-06 | 2.035E-06 | 3.703E-07 |
| 5350 | G13B_A | F3B_A  | T4B_A  | L23B_R | 1.1E-06 | 3.3E-06 | 2.035E-06 | 6.839E-07 |
| 5351 | G13B_A | K17B_A | F19B_Q | E12B_A | 9.3E-07 | 5.3E-06 | 2.036E-06 | 1.011E-06 |
| 5352 | Y10B_A | F3B_A  | E18B_T | F19B_W | 9.6E-07 | 3.6E-06 | 2.038E-06 | 7.592E-07 |
| 5353 | S8B_A  | G13B_W | F19B_Q | Q14B_A | 9.2E-07 | 4.2E-06 | 2.039E-06 | 7.890E-07 |
| 5354 | G13B_A | A16B_N | V24B_Q | T2B_A  | 9.0E-07 | 3.9E-06 | 2.040E-06 | 7.877E-07 |
| 5355 | Y10B_A | E18B_A | S9B_A  | E12B_A | 1.1E-06 | 2.7E-06 | 2.040E-06 | 3.992E-07 |



|      |        |        |        |        |         |         |           |           |
|------|--------|--------|--------|--------|---------|---------|-----------|-----------|
| 5356 | G13B_A | S8B_A  | F3B_A  | V24B_N | 1.2E-06 | 3.0E-06 | 2.040E-06 | 5.195E-07 |
| 5357 | G13B_A | F3B_A  | G1B_R  | E12B_A | 1.6E-06 | 3.1E-06 | 2.040E-06 | 4.558E-07 |
| 5358 | Y10B_A | G13B_W | V7B_A  | E12B_A | 1.3E-06 | 3.9E-06 | 2.040E-06 | 5.844E-07 |
| 5359 | G13B_A | T2B_A  | V24B_N | G1B_A  | 1.3E-06 | 3.1E-06 | 2.040E-06 | 5.404E-07 |
| 5360 | G13B_A | F3B_A  | T4B_A  | L23B_Q | 1.2E-06 | 3.9E-06 | 2.040E-06 | 6.739E-07 |
| 5361 | S8B_A  | V7B_A  | F3B_A  | F19B_Q | 1.2E-06 | 3.3E-06 | 2.040E-06 | 5.995E-07 |
| 5362 | Y10B_A | V7B_A  | L23B_Q | F19B_A | 8.8E-07 | 3.7E-06 | 2.041E-06 | 7.909E-07 |
| 5363 | G13B_A | A16B_N | T2B_A  | V24B_N | 2.9E-07 | 3.4E-06 | 2.042E-06 | 8.628E-07 |
| 5364 | Y10B_A | D6B_A  | G1B_R  | L23B_Q | 7.6E-07 | 3.3E-06 | 2.043E-06 | 5.952E-07 |
| 5365 | Y10B_A | G13B_W | L23B_R | Q14B_A | 1.4E-06 | 3.4E-06 | 2.045E-06 | 5.031E-07 |
| 5366 | Y10B_A | L11B_A | G1B_R  | L23B_Q | 1.0E-06 | 3.5E-06 | 2.045E-06 | 6.262E-07 |
| 5367 | Y10B_A | F19B_W | T4B_A  | L23B_Q | 1.0E-06 | 4.1E-06 | 2.045E-06 | 7.045E-07 |
| 5368 | G13B_A | T4B_A  | S9B_A  | E12B_A | 1.2E-06 | 3.2E-06 | 2.045E-06 | 5.530E-07 |
| 5369 | Y10B_A | F3B_A  | E18B_A | V24B_T | 1.1E-06 | 3.1E-06 | 2.045E-06 | 5.145E-07 |
| 5370 | Y10B_A | A16B_N | E18B_A | L23B_R | 4.8E-07 | 3.2E-06 | 2.046E-06 | 8.652E-07 |
| 5371 | G13B_A | V7B_A  | F3B_A  | K17B_S | 1.3E-06 | 3.0E-06 | 2.050E-06 | 5.237E-07 |
| 5372 | G13B_A | S8B_A  | F3B_A  | V24B_Q | 1.2E-06 | 3.6E-06 | 2.050E-06 | 5.558E-07 |
| 5373 | G13B_A | V7B_A  | V24B_T | Q14B_A | 1.4E-06 | 4.3E-06 | 2.050E-06 | 6.692E-07 |
| 5374 | G13B_A | D6B_A  | L11B_A | F19B_Q | 1.0E-06 | 3.5E-06 | 2.050E-06 | 6.871E-07 |
| 5375 | G13B_A | F3B_A  | S5B_A  | L23B_Q | 1.0E-06 | 3.7E-06 | 2.050E-06 | 6.420E-07 |
| 5376 | Y10B_A | D6B_A  | G1B_R  | V24B_Q | 1.3E-06 | 3.6E-06 | 2.050E-06 | 5.835E-07 |
| 5377 | Y10B_A | V7B_A  | E18B_T | F19B_W | 8.5E-07 | 3.0E-06 | 2.050E-06 | 7.216E-07 |
| 5378 | Y10B_A | I20B_N | S5B_A  | T2B_A  | 1.3E-06 | 2.9E-06 | 2.050E-06 | 4.286E-07 |
| 5379 | G13B_A | A16B_N | L23B_R | Q14B_A | 3.2E-07 | 5.0E-06 | 2.051E-06 | 1.067E-06 |
| 5380 | G13B_A | A16B_N | S5B_A  | L23B_Q | 6.9E-07 | 4.6E-06 | 2.052E-06 | 1.060E-06 |
| 5381 | G13B_A | S8B_A  | K17B_S | E12B_A | 9.5E-07 | 4.7E-06 | 2.053E-06 | 1.065E-06 |
| 5382 | G13B_A | A16B_N | T4B_A  | V24B_T | 5.5E-07 | 3.9E-06 | 2.053E-06 | 7.792E-07 |
| 5383 | G13B_A | F19B_W | S9B_A  | T2B_A  | 9.6E-07 | 2.9E-06 | 2.053E-06 | 5.532E-07 |
| 5384 | G13B_A | Y10B_A | V24B_N | G1B_A  | 1.1E-06 | 3.0E-06 | 2.055E-06 | 6.573E-07 |
| 5385 | G13B_A | F3B_A  | T4B_A  | V24B_T | 1.4E-06 | 2.6E-06 | 2.055E-06 | 3.677E-07 |
| 5386 | Y10B_A | G1B_R  | F19B_W | S9B_A  | 1.0E-06 | 3.4E-06 | 2.055E-06 | 6.203E-07 |
| 5387 | Y10B_A | D6B_A  | E18B_T | E12B_A | 1.0E-06 | 3.3E-06 | 2.055E-06 | 5.871E-07 |
| 5388 | S8B_A  | G13B_W | T4B_A  | L23B_R | 1.2E-06 | 2.9E-06 | 2.055E-06 | 5.336E-07 |
| 5389 | Y10B_A | S8B_A  | L23B_R | E12B_A | 1.2E-06 | 2.8E-06 | 2.055E-06 | 4.774E-07 |
| 5390 | Y10B_A | I20B_Q | S5B_A  | K17B_A | 1.2E-06 | 3.2E-06 | 2.055E-06 | 5.539E-07 |
| 5391 | G13B_A | Y10B_A | V7B_A  | V24B_Q | 1.1E-06 | 3.2E-06 | 2.055E-06 | 5.346E-07 |
| 5392 | Y10B_A | A16B_N | G1B_R  | V24B_Q | 7.3E-07 | 3.4E-06 | 2.057E-06 | 6.444E-07 |
| 5393 | G13B_A | F3B_A  | L23B_Q | T2B_A  | 8.4E-07 | 3.7E-06 | 2.057E-06 | 7.522E-07 |
| 5394 | Y10B_A | I20B_S | S5B_A  | T4B_A  | 1.1E-06 | 3.0E-06 | 2.060E-06 | 5.960E-07 |
| 5395 | S8B_A  | G13B_W | E18B_A | F19B_W | 1.2E-06 | 3.4E-06 | 2.060E-06 | 6.303E-07 |
| 5396 | Y10B_A | D6B_A  | F19B_W | S9B_A  | 1.0E-06 | 4.1E-06 | 2.060E-06 | 7.680E-07 |
| 5397 | G13B_A | F3B_A  | E18B_T | L11B_A | 1.4E-06 | 2.8E-06 | 2.060E-06 | 4.260E-07 |
| 5398 | Y10B_A | G1B_R  | K17B_S | F19B_A | 1.2E-06 | 3.8E-06 | 2.060E-06 | 6.261E-07 |
| 5399 | Y10B_A | V7B_A  | F3B_A  | V24B_T | 1.2E-06 | 3.4E-06 | 2.060E-06 | 5.082E-07 |
| 5400 | Y10B_A | I20B_S | T4B_A  | Q14B_A | 1.3E-06 | 2.9E-06 | 2.060E-06 | 5.276E-07 |
| 5401 | S8B_A  | G13B_W | F19B_A | E12B_A | 1.3E-06 | 3.1E-06 | 2.060E-06 | 5.835E-07 |
| 5402 | Y10B_A | S9B_A  | L23B_Q | T2B_A  | 1.3E-06 | 2.9E-06 | 2.060E-06 | 4.988E-07 |
| 5403 | Y10B_A | T2B_A  | E12B_A | V24B_N | 7.3E-07 | 3.4E-06 | 2.061E-06 | 7.535E-07 |
| 5404 | S8B_A  | G13B_W | L23B_R | Q14B_A | 8.7E-07 | 3.8E-06 | 2.064E-06 | 7.475E-07 |
| 5405 | G13B_A | A16B_N | F19B_Q | T2B_A  | 4.6E-07 | 3.8E-06 | 2.064E-06 | 9.719E-07 |
| 5406 | Y10B_A | L11B_A | L23B_Q | G1B_A  | 1.2E-06 | 4.2E-06 | 2.065E-06 | 6.968E-07 |
| 5407 | Y10B_A | S8B_A  | S9B_A  | L23B_R | 1.3E-06 | 3.2E-06 | 2.065E-06 | 5.806E-07 |

|      |        |        |        |        |         |         |           |           |
|------|--------|--------|--------|--------|---------|---------|-----------|-----------|
| 5408 | Y10B_A | E18B_A | V24B_N | G1B_A  | 1.0E-06 | 3.9E-06 | 2.065E-06 | 7.286E-07 |
| 5409 | G13B_A | S8B_A  | F19B_A | V24B_T | 1.3E-06 | 3.0E-06 | 2.065E-06 | 5.060E-07 |
| 5410 | G13B_A | A16B_N | S5B_A  | F19B_Q | 3.4E-07 | 3.6E-06 | 2.066E-06 | 9.338E-07 |
| 5411 | G13B_A | S5B_A  | L23B_Q | G1B_A  | 6.8E-07 | 3.9E-06 | 2.069E-06 | 7.601E-07 |
| 5412 | Y10B_A | L23B_R | Q14B_A | E12B_A | 1.2E-06 | 4.2E-06 | 2.070E-06 | 7.435E-07 |
| 5413 | G13B_A | L11B_A | G1B_R  | F19B_W | 1.2E-06 | 2.9E-06 | 2.070E-06 | 5.302E-07 |
| 5414 | G13B_A | S8B_A  | L23B_R | G1B_A  | 1.3E-06 | 3.7E-06 | 2.070E-06 | 6.783E-07 |
| 5415 | G13B_A | S8B_A  | S9B_A  | E12B_A | 1.2E-06 | 3.4E-06 | 2.070E-06 | 5.273E-07 |
| 5416 | Y10B_A | V7B_A  | L11B_A | L23B_Q | 8.4E-07 | 3.3E-06 | 2.072E-06 | 6.334E-07 |
| 5417 | Y10B_A | E18B_T | S5B_A  | F19B_Q | 1.1E-06 | 3.7E-06 | 2.075E-06 | 7.454E-07 |
| 5418 | G13B_A | L23B_R | T2B_A  | G1B_A  | 1.2E-06 | 3.4E-06 | 2.075E-06 | 6.439E-07 |
| 5419 | Y10B_A | L23B_Q | T2B_A  | E12B_A | 1.1E-06 | 3.2E-06 | 2.075E-06 | 6.480E-07 |
| 5420 | G13B_A | D6B_A  | E18B_A | F19B_Q | 9.9E-07 | 3.7E-06 | 2.075E-06 | 7.218E-07 |
| 5421 | G13B_A | V7B_A  | F3B_A  | E18B_T | 1.1E-06 | 4.0E-06 | 2.075E-06 | 8.181E-07 |
| 5422 | Y10B_A | D6B_A  | L11B_A | V24B_N | 1.2E-06 | 3.0E-06 | 2.075E-06 | 4.734E-07 |
| 5423 | G13B_A | Y10B_A | L11B_A | V24B_T | 1.4E-06 | 3.2E-06 | 2.075E-06 | 5.476E-07 |
| 5424 | G13B_A | A16B_N | E18B_T | G1B_A  | 4.9E-07 | 3.5E-06 | 2.077E-06 | 7.823E-07 |
| 5425 | S8B_A  | G13B_W | F3B_A  | E12B_A | 1.3E-06 | 4.2E-06 | 2.080E-06 | 5.800E-07 |
| 5426 | G13B_A | E18B_T | K17B_A | L23B_R | 1.2E-06 | 4.2E-06 | 2.080E-06 | 7.613E-07 |
| 5427 | S8B_A  | D6B_A  | G1B_R  | V24B_T | 8.1E-07 | 3.3E-06 | 2.080E-06 | 5.985E-07 |
| 5428 | G13B_A | S8B_A  | L23B_Q | F19B_A | 1.2E-06 | 3.7E-06 | 2.080E-06 | 8.269E-07 |
| 5429 | G13B_A | L11B_A | K17B_A | V24B_Q | 1.2E-06 | 2.9E-06 | 2.080E-06 | 4.675E-07 |
| 5430 | Y10B_A | L23B_R | T2B_A  | E12B_A | 1.2E-06 | 3.5E-06 | 2.080E-06 | 5.890E-07 |
| 5431 | G13B_A | F3B_A  | E18B_T | F19B_A | 1.1E-06 | 4.5E-06 | 2.080E-06 | 7.791E-07 |
| 5432 | S8B_A  | D6B_A  | A16B_N | L23B_Q | 6.0E-07 | 3.5E-06 | 2.081E-06 | 8.303E-07 |
| 5433 | G13B_A | Y10B_A | L23B_R | G1B_A  | 7.5E-07 | 3.3E-06 | 2.083E-06 | 6.323E-07 |
| 5434 | G13B_A | E18B_A | L23B_Q | T2B_A  | 1.3E-06 | 3.5E-06 | 2.085E-06 | 5.556E-07 |
| 5435 | G13B_A | Y10B_A | G1B_R  | L23B_R | 1.5E-06 | 3.0E-06 | 2.085E-06 | 4.815E-07 |
| 5436 | Y10B_A | F3B_A  | E18B_A | V24B_Q | 1.4E-06 | 2.7E-06 | 2.085E-06 | 3.870E-07 |
| 5437 | G13B_A | K17B_A | F19B_A | V24B_N | 1.3E-06 | 3.0E-06 | 2.085E-06 | 4.848E-07 |
| 5438 | Y10B_A | L11B_A | E18B_A | V24B_Q | 1.0E-06 | 4.6E-06 | 2.085E-06 | 8.054E-07 |
| 5439 | Y10B_A | D6B_A  | V24B_Q | G1B_A  | 1.1E-06 | 3.3E-06 | 2.085E-06 | 4.760E-07 |
| 5440 | G13B_A | Y10B_A | D6B_A  | L23B_Q | 1.4E-06 | 3.4E-06 | 2.085E-06 | 5.788E-07 |
| 5441 | G13B_A | F3B_A  | F19B_Q | G1B_A  | 1.0E-06 | 5.1E-06 | 2.085E-06 | 9.566E-07 |
| 5442 | G13B_A | D6B_A  | F19B_Q | G1B_A  | 6.4E-07 | 4.3E-06 | 2.087E-06 | 9.621E-07 |
| 5443 | G13B_A | A16B_N | T4B_A  | V24B_N | 5.2E-07 | 3.9E-06 | 2.088E-06 | 9.218E-07 |
| 5444 | Y10B_A | S8B_A  | F19B_W | K17B_S | 9.8E-07 | 3.3E-06 | 2.089E-06 | 7.161E-07 |
| 5445 | S8B_A  | G13B_W | S5B_A  | K17B_S | 9.8E-07 | 3.3E-06 | 2.089E-06 | 6.860E-07 |
| 5446 | Y10B_A | D6B_A  | E18B_A | L23B_Q | 1.4E-06 | 3.1E-06 | 2.090E-06 | 4.855E-07 |
| 5447 | Y10B_A | F3B_A  | L11B_A | V24B_T | 1.2E-06 | 3.0E-06 | 2.090E-06 | 4.217E-07 |
| 5448 | Y10B_A | D6B_A  | V7B_A  | L23B_Q | 1.2E-06 | 3.4E-06 | 2.090E-06 | 5.767E-07 |
| 5449 | Y10B_A | L11B_A | G1B_R  | L23B_R | 1.4E-06 | 3.8E-06 | 2.090E-06 | 5.350E-07 |
| 5450 | G13B_A | V7B_A  | T4B_A  | L23B_Q | 1.0E-06 | 2.8E-06 | 2.090E-06 | 4.930E-07 |
| 5451 | G13B_A | L23B_R | F19B_A | Q14B_A | 1.5E-06 | 3.5E-06 | 2.090E-06 | 5.447E-07 |
| 5452 | G13B_A | T4B_A  | L23B_Q | G1B_A  | 1.1E-06 | 3.2E-06 | 2.090E-06 | 6.215E-07 |
| 5453 | Y10B_A | V7B_A  | E18B_A | L23B_R | 9.3E-07 | 3.7E-06 | 2.092E-06 | 6.210E-07 |
| 5454 | G13B_A | A16B_N | S5B_A  | V24B_Q | 7.6E-07 | 4.0E-06 | 2.093E-06 | 8.712E-07 |
| 5455 | Y10B_A | V7B_A  | G1B_R  | F19B_Q | 5.8E-07 | 3.6E-06 | 2.094E-06 | 8.147E-07 |
| 5456 | Y10B_A | L23B_Q | F19B_A | G1B_A  | 9.9E-07 | 3.3E-06 | 2.094E-06 | 7.911E-07 |
| 5457 | S8B_A  | D6B_A  | E18B_T | F19B_W | 1.3E-06 | 5.6E-06 | 2.095E-06 | 9.698E-07 |
| 5458 | G13B_A | E18B_A | S5B_A  | V24B_T | 1.5E-06 | 3.0E-06 | 2.095E-06 | 3.953E-07 |
| 5459 | Y10B_A | L11B_A | G1B_R  | V24B_T | 1.3E-06 | 3.2E-06 | 2.095E-06 | 5.680E-07 |

|      |        |        |        |        |         |         |           |           |
|------|--------|--------|--------|--------|---------|---------|-----------|-----------|
| 5460 | G13B_A | D6B_A  | V24B_T | Q14B_A | 1.1E-06 | 3.2E-06 | 2.095E-06 | 5.165E-07 |
| 5461 | Y10B_A | L23B_Q | Q14B_A | E12B_A | 1.1E-06 | 4.3E-06 | 2.095E-06 | 7.067E-07 |
| 5462 | G13B_A | S8B_A  | V24B_N | G1B_A  | 1.1E-06 | 3.8E-06 | 2.095E-06 | 7.564E-07 |
| 5463 | Y10B_A | G1B_R  | T2B_A  | V24B_N | 1.4E-06 | 3.1E-06 | 2.095E-06 | 4.536E-07 |
| 5464 | Y10B_A | D6B_A  | L11B_A | V24B_Q | 8.4E-07 | 3.3E-06 | 2.096E-06 | 6.291E-07 |
| 5465 | Y10B_A | A16B_N | E18B_A | L23B_Q | 4.7E-07 | 4.6E-06 | 2.097E-06 | 1.287E-06 |
| 5466 | Y10B_A | A16B_N | E18B_T | F19B_W | 5.1E-07 | 3.6E-06 | 2.098E-06 | 8.175E-07 |
| 5467 | G13B_A | V7B_A  | L11B_A | S9B_A  | 9.6E-07 | 3.2E-06 | 2.098E-06 | 5.726E-07 |
| 5468 | Y10B_A | T4B_A  | S9B_A  | K17B_S | 8.5E-07 | 3.4E-06 | 2.098E-06 | 5.895E-07 |
| 5469 | G13B_A | F3B_A  | S9B_A  | G1B_A  | 1.5E-06 | 2.6E-06 | 2.100E-06 | 3.613E-07 |
| 5470 | G13B_A | S8B_A  | L11B_A | L23B_R | 1.5E-06 | 3.3E-06 | 2.100E-06 | 4.899E-07 |
| 5471 | G13B_A | S9B_A  | F19B_A | G1B_A  | 1.1E-06 | 3.7E-06 | 2.100E-06 | 6.424E-07 |
| 5472 | G13B_A | V7B_A  | F3B_A  | S9B_A  | 1.6E-06 | 2.9E-06 | 2.100E-06 | 3.509E-07 |
| 5473 | G13B_A | D6B_A  | T2B_A  | V24B_N | 1.1E-06 | 4.1E-06 | 2.100E-06 | 6.577E-07 |
| 5474 | G13B_A | F3B_A  | L23B_R | T2B_A  | 1.0E-06 | 4.3E-06 | 2.105E-06 | 7.790E-07 |
| 5475 | S8B_A  | D6B_A  | F19B_W | S9B_A  | 1.0E-06 | 3.4E-06 | 2.105E-06 | 6.932E-07 |
| 5476 | G13B_A | L11B_A | V24B_T | T2B_A  | 1.1E-06 | 3.2E-06 | 2.105E-06 | 5.176E-07 |
| 5477 | Y10B_A | G13B_W | K17B_A | V24B_T | 1.1E-06 | 3.1E-06 | 2.105E-06 | 5.306E-07 |
| 5478 | Y10B_A | K17B_A | S9B_A  | V24B_N | 1.1E-06 | 4.2E-06 | 2.105E-06 | 7.430E-07 |
| 5479 | Y10B_A | L11B_A | L23B_R | G1B_A  | 1.1E-06 | 4.5E-06 | 2.105E-06 | 7.494E-07 |
| 5480 | Y10B_A | A16B_N | K17B_S | E12B_A | 6.0E-07 | 3.6E-06 | 2.108E-06 | 9.578E-07 |
| 5481 | G13B_A | S8B_A  | F3B_A  | V24B_T | 1.4E-06 | 2.9E-06 | 2.110E-06 | 3.712E-07 |
| 5482 | Y10B_A | D6B_A  | A16B_N | V24B_Q | 6.1E-07 | 3.5E-06 | 2.110E-06 | 8.899E-07 |
| 5483 | G13B_A | D6B_A  | T4B_A  | L23B_Q | 1.1E-06 | 3.0E-06 | 2.110E-06 | 5.025E-07 |
| 5484 | G13B_A | L11B_A | L23B_R | Q14B_A | 1.2E-06 | 4.5E-06 | 2.110E-06 | 7.636E-07 |
| 5485 | Y10B_A | S8B_A  | F19B_W | V24B_N | 1.0E-06 | 3.8E-06 | 2.110E-06 | 7.210E-07 |
| 5486 | Y10B_A | A16B_N | E18B_T | E12B_A | 3.5E-07 | 6.7E-06 | 2.112E-06 | 1.394E-06 |
| 5487 | S8B_A  | V7B_A  | A16B_N | L23B_Q | 8.8E-07 | 3.2E-06 | 2.113E-06 | 7.035E-07 |
| 5488 | Y10B_A | G13B_W | F3B_A  | E12B_A | 8.8E-07 | 3.0E-06 | 2.114E-06 | 4.732E-07 |
| 5489 | G13B_A | L11B_A | T2B_A  | V24B_N | 1.1E-06 | 3.6E-06 | 2.115E-06 | 6.862E-07 |
| 5490 | Y10B_A | S8B_A  | G13B_W | L23B_Q | 1.0E-06 | 4.1E-06 | 2.115E-06 | 8.002E-07 |
| 5491 | G13B_A | E18B_T | S9B_A  | Q14B_A | 1.2E-06 | 4.1E-06 | 2.115E-06 | 7.995E-07 |
| 5492 | Y10B_A | D6B_A  | V7B_A  | V24B_Q | 1.2E-06 | 3.3E-06 | 2.115E-06 | 6.961E-07 |
| 5493 | G13B_A | G1B_R  | T4B_A  | V24B_N | 1.2E-06 | 4.0E-06 | 2.115E-06 | 6.722E-07 |
| 5494 | G13B_A | Y10B_A | S9B_A  | E12B_A | 1.5E-06 | 3.0E-06 | 2.115E-06 | 4.660E-07 |
| 5495 | Y10B_A | F19B_W | E12B_A | G1B_A  | 1.2E-06 | 3.5E-06 | 2.115E-06 | 5.914E-07 |
| 5496 | Y10B_A | I20B_S | K17B_A | T4B_A  | 1.2E-06 | 2.9E-06 | 2.115E-06 | 4.870E-07 |
| 5497 | G13B_A | A16B_N | V24B_Q | Q14B_A | 8.3E-07 | 4.0E-06 | 2.118E-06 | 9.825E-07 |
| 5498 | Y10B_A | E18B_T | L11B_A | F19B_W | 1.4E-06 | 3.8E-06 | 2.120E-06 | 6.346E-07 |
| 5499 | Y10B_A | L11B_A | F19B_A | V24B_T | 1.4E-06 | 5.3E-06 | 2.120E-06 | 8.569E-07 |
| 5500 | Y10B_A | L11B_A | L23B_R | F19B_A | 1.1E-06 | 3.5E-06 | 2.120E-06 | 5.435E-07 |
| 5501 | Y10B_A | D6B_A  | F3B_A  | V24B_T | 1.5E-06 | 3.5E-06 | 2.120E-06 | 5.095E-07 |
| 5502 | Y10B_A | D6B_A  | G13B_W | S9B_A  | 1.5E-06 | 3.3E-06 | 2.120E-06 | 4.873E-07 |
| 5503 | S8B_A  | D6B_A  | F19B_A | V24B_N | 1.2E-06 | 3.9E-06 | 2.120E-06 | 6.566E-07 |
| 5504 | G13B_A | L23B_Q | F19B_A | Q14B_A | 1.2E-06 | 3.5E-06 | 2.120E-06 | 7.068E-07 |
| 5505 | S8B_A  | V7B_A  | F3B_A  | L23B_R | 1.2E-06 | 3.7E-06 | 2.120E-06 | 6.461E-07 |
| 5506 | Y10B_A | G13B_W | A16B_N | F19B_W | 6.6E-07 | 3.6E-06 | 2.121E-06 | 9.263E-07 |
| 5507 | G13B_A | V7B_A  | L23B_R | T2B_A  | 8.6E-07 | 3.5E-06 | 2.123E-06 | 6.536E-07 |
| 5508 | G13B_A | V7B_A  | T2B_A  | V24B_N | 1.6E-06 | 3.6E-06 | 2.125E-06 | 5.139E-07 |
| 5509 | G13B_A | V7B_A  | K17B_S | G1B_A  | 1.5E-06 | 3.5E-06 | 2.125E-06 | 6.129E-07 |
| 5510 | G13B_A | E18B_A | V24B_T | T2B_A  | 1.5E-06 | 2.7E-06 | 2.125E-06 | 3.193E-07 |
| 5511 | G13B_A | S5B_A  | F19B_W | E12B_A | 1.2E-06 | 4.1E-06 | 2.125E-06 | 7.239E-07 |

|      |        |        |        |        |         |         |           |           |
|------|--------|--------|--------|--------|---------|---------|-----------|-----------|
| 5512 | S8B_A  | G13B_W | E18B_A | E12B_A | 1.6E-06 | 3.2E-06 | 2.125E-06 | 4.290E-07 |
| 5513 | Y10B_A | G13B_W | T4B_A  | S9B_A  | 1.5E-06 | 3.0E-06 | 2.125E-06 | 4.506E-07 |
| 5514 | Y10B_A | G1B_R  | V24B_Q | Q14B_A | 1.2E-06 | 3.1E-06 | 2.125E-06 | 6.282E-07 |
| 5515 | G13B_A | A16B_N | S5B_A  | V24B_T | 6.5E-07 | 4.5E-06 | 2.125E-06 | 9.568E-07 |
| 5516 | G13B_A | L11B_A | S5B_A  | V24B_T | 1.3E-06 | 3.0E-06 | 2.125E-06 | 4.983E-07 |
| 5517 | Y10B_A | V7B_A  | L11B_A | F19B_Q | 9.7E-07 | 5.4E-06 | 2.129E-06 | 9.838E-07 |
| 5518 | Y10B_A | S8B_A  | V24B_T | E12B_A | 1.1E-06 | 3.0E-06 | 2.130E-06 | 5.777E-07 |
| 5519 | G13B_A | V7B_A  | S5B_A  | L23B_Q | 1.2E-06 | 3.9E-06 | 2.130E-06 | 8.221E-07 |
| 5520 | G13B_A | Y10B_A | L11B_A | L23B_R | 1.3E-06 | 3.1E-06 | 2.130E-06 | 5.545E-07 |
| 5521 | G13B_A | Y10B_A | F3B_A  | F19B_Q | 1.1E-06 | 3.6E-06 | 2.130E-06 | 7.087E-07 |
| 5522 | S8B_A  | D6B_A  | F3B_A  | V24B_N | 1.1E-06 | 3.9E-06 | 2.130E-06 | 8.221E-07 |
| 5523 | Y10B_A | F19B_Q | S9B_A  | Q14B_A | 1.2E-06 | 3.5E-06 | 2.130E-06 | 7.005E-07 |
| 5524 | G13B_A | D6B_A  | V7B_A  | K17B_S | 1.1E-06 | 3.3E-06 | 2.130E-06 | 6.001E-07 |
| 5525 | G13B_A | E18B_A | Q14B_A | V24B_N | 1.0E-06 | 3.3E-06 | 2.130E-06 | 5.371E-07 |
| 5526 | Y10B_A | G1B_R  | F19B_W | E12B_A | 1.0E-06 | 4.0E-06 | 2.130E-06 | 7.183E-07 |
| 5527 | S8B_A  | D6B_A  | G1B_R  | L23B_R | 1.3E-06 | 3.1E-06 | 2.135E-06 | 5.687E-07 |
| 5528 | Y10B_A | F3B_A  | E18B_A | V24B_N | 1.3E-06 | 3.2E-06 | 2.135E-06 | 4.682E-07 |
| 5529 | Y10B_A | S8B_A  | F19B_Q | S9B_A  | 1.0E-06 | 3.3E-06 | 2.135E-06 | 6.627E-07 |
| 5530 | G13B_A | G1B_R  | K17B_S | F19B_A | 1.0E-06 | 3.8E-06 | 2.135E-06 | 7.680E-07 |
| 5531 | G13B_A | E18B_A | V24B_T | Q14B_A | 1.5E-06 | 3.5E-06 | 2.135E-06 | 4.475E-07 |
| 5532 | Y10B_A | D6B_A  | F3B_A  | V24B_N | 1.0E-06 | 4.1E-06 | 2.135E-06 | 7.293E-07 |
| 5533 | G13B_A | Y10B_A | L23B_Q | G1B_A  | 1.1E-06 | 3.9E-06 | 2.135E-06 | 6.515E-07 |
| 5534 | G13B_A | S8B_A  | D6B_A  | V24B_Q | 1.0E-06 | 4.1E-06 | 2.140E-06 | 7.507E-07 |
| 5535 | Y10B_A | E18B_A | G1B_R  | L23B_Q | 1.4E-06 | 3.3E-06 | 2.140E-06 | 5.462E-07 |
| 5536 | Y10B_A | L11B_A | S9B_A  | E12B_A | 1.5E-06 | 4.2E-06 | 2.140E-06 | 6.336E-07 |
| 5537 | Y10B_A | F3B_A  | S9B_A  | E12B_A | 1.3E-06 | 3.6E-06 | 2.140E-06 | 5.670E-07 |
| 5538 | Y10B_A | L11B_A | E18B_A | L23B_R | 1.1E-06 | 3.1E-06 | 2.140E-06 | 5.595E-07 |
| 5539 | Y10B_A | G13B_W | G1B_R  | E12B_A | 1.4E-06 | 3.5E-06 | 2.140E-06 | 5.960E-07 |
| 5540 | Y10B_A | D6B_A  | A16B_N | V24B_T | 5.2E-07 | 3.5E-06 | 2.141E-06 | 7.421E-07 |
| 5541 | S8B_A  | G13B_W | L11B_A | F19B_W | 1.3E-06 | 3.6E-06 | 2.145E-06 | 5.539E-07 |
| 5542 | Y10B_A | L11B_A | S5B_A  | V24B_N | 1.2E-06 | 3.3E-06 | 2.145E-06 | 5.539E-07 |
| 5543 | S8B_A  | V7B_A  | A16B_N | F19B_Q | 3.4E-07 | 4.8E-06 | 2.145E-06 | 1.157E-06 |
| 5544 | Y10B_A | L11B_A | E18B_A | V24B_T | 1.2E-06 | 3.3E-06 | 2.145E-06 | 5.356E-07 |
| 5545 | Y10B_A | F3B_A  | G1B_R  | F19B_Q | 1.1E-06 | 6.5E-06 | 2.145E-06 | 1.169E-06 |
| 5546 | G13B_A | S8B_A  | V7B_A  | F19B_Q | 1.2E-06 | 3.2E-06 | 2.145E-06 | 5.817E-07 |
| 5547 | Y10B_A | I20B_T | K17B_A | T2B_A  | 1.4E-06 | 3.2E-06 | 2.145E-06 | 5.104E-07 |
| 5548 | S8B_A  | D6B_A  | F19B_W | K17B_S | 1.1E-06 | 3.7E-06 | 2.145E-06 | 7.000E-07 |
| 5549 | G13B_A | F3B_A  | K17B_S | F19B_A | 1.4E-06 | 3.1E-06 | 2.145E-06 | 4.707E-07 |
| 5550 | Y10B_A | T4B_A  | K17B_S | E12B_A | 9.2E-07 | 4.1E-06 | 2.146E-06 | 7.160E-07 |
| 5551 | G13B_A | F3B_A  | F19B_W | G1B_A  | 9.3E-07 | 3.6E-06 | 2.147E-06 | 6.137E-07 |
| 5552 | Y10B_A | V7B_A  | L11B_A | V24B_N | 9.6E-07 | 4.7E-06 | 2.148E-06 | 8.279E-07 |
| 5553 | Y10B_A | D6B_A  | K17B_S | E12B_A | 8.8E-07 | 3.4E-06 | 2.149E-06 | 6.966E-07 |
| 5554 | S8B_A  | G13B_W | V7B_A  | E12B_A | 1.3E-06 | 3.3E-06 | 2.150E-06 | 4.560E-07 |
| 5555 | Y10B_A | K17B_A | E12B_A | V24B_N | 1.2E-06 | 3.5E-06 | 2.150E-06 | 6.312E-07 |
| 5556 | G13B_A | V7B_A  | E18B_A | F19B_W | 1.1E-06 | 3.1E-06 | 2.150E-06 | 5.000E-07 |
| 5557 | G13B_A | D6B_A  | L11B_A | K17B_S | 9.0E-07 | 3.7E-06 | 2.150E-06 | 6.677E-07 |
| 5558 | G13B_A | F3B_A  | V24B_T | Q14B_A | 1.2E-06 | 4.4E-06 | 2.150E-06 | 7.045E-07 |
| 5559 | G13B_A | E18B_A | S9B_A  | F19B_A | 1.1E-06 | 3.0E-06 | 2.150E-06 | 5.336E-07 |
| 5560 | Y10B_A | A16B_N | L11B_A | V24B_Q | 7.9E-07 | 3.9E-06 | 2.151E-06 | 8.279E-07 |
| 5561 | G13B_A | Y10B_A | L23B_R | F19B_A | 1.3E-06 | 4.0E-06 | 2.155E-06 | 7.265E-07 |
| 5562 | Y10B_A | D6B_A  | F19B_A | V24B_Q | 1.1E-06 | 3.9E-06 | 2.155E-06 | 6.886E-07 |
| 5563 | G13B_A | S9B_A  | T2B_A  | E12B_A | 1.0E-06 | 5.2E-06 | 2.155E-06 | 8.507E-07 |

|      |        |        |        |        |         |         |           |           |
|------|--------|--------|--------|--------|---------|---------|-----------|-----------|
| 5564 | Y10B_A | A16B_N | F19B_A | V24B_Q | 6.9E-07 | 4.1E-06 | 2.155E-06 | 9.401E-07 |
| 5565 | G13B_A | S8B_A  | F19B_W | S9B_A  | 9.6E-07 | 3.8E-06 | 2.158E-06 | 6.400E-07 |
| 5566 | Y10B_A | K17B_S | E12B_A | G1B_A  | 1.2E-06 | 4.2E-06 | 2.160E-06 | 7.081E-07 |
| 5567 | G13B_A | S8B_A  | G1B_R  | L23B_R | 9.0E-07 | 3.6E-06 | 2.160E-06 | 6.151E-07 |
| 5568 | Y10B_A | D6B_A  | F19B_A | V24B_T | 1.0E-06 | 3.5E-06 | 2.160E-06 | 6.021E-07 |
| 5569 | S8B_A  | G13B_W | K17B_S | T2B_A  | 1.2E-06 | 3.9E-06 | 2.160E-06 | 6.353E-07 |
| 5570 | G13B_A | V7B_A  | F19B_W | G1B_A  | 1.3E-06 | 3.0E-06 | 2.160E-06 | 5.404E-07 |
| 5571 | Y10B_A | F3B_A  | E18B_A | L23B_Q | 1.5E-06 | 3.0E-06 | 2.160E-06 | 4.500E-07 |
| 5572 | Y10B_A | A16B_N | I20B_N | K17B_A | 1.4E-06 | 3.2E-06 | 2.165E-06 | 5.499E-07 |
| 5573 | G13B_A | D6B_A  | E18B_T | F19B_A | 1.1E-06 | 3.4E-06 | 2.165E-06 | 5.833E-07 |
| 5574 | G13B_A | V7B_A  | V24B_T | T2B_A  | 1.3E-06 | 3.2E-06 | 2.165E-06 | 5.669E-07 |
| 5575 | G13B_A | L23B_Q | T2B_A  | G1B_A  | 1.1E-06 | 3.5E-06 | 2.165E-06 | 6.442E-07 |
| 5576 | Y10B_A | A16B_N | L23B_Q | G1B_A  | 8.9E-07 | 4.3E-06 | 2.165E-06 | 8.520E-07 |
| 5577 | G13B_A | F3B_A  | L11B_A | E12B_A | 1.2E-06 | 2.8E-06 | 2.165E-06 | 4.977E-07 |
| 5578 | G13B_A | L11B_A | S5B_A  | L23B_R | 1.1E-06 | 4.3E-06 | 2.165E-06 | 7.235E-07 |
| 5579 | G13B_A | L11B_A | E18B_A | K17B_S | 5.8E-07 | 3.7E-06 | 2.169E-06 | 8.067E-07 |
| 5580 | Y10B_A | A16B_N | T4B_A  | F19B_Q | 6.1E-07 | 6.6E-06 | 2.170E-06 | 1.420E-06 |
| 5581 | Y10B_A | E18B_T | K17B_A | V24B_Q | 1.1E-06 | 3.6E-06 | 2.170E-06 | 6.208E-07 |
| 5582 | S8B_A  | D6B_A  | F3B_A  | L23B_Q | 1.2E-06 | 4.2E-06 | 2.170E-06 | 6.830E-07 |
| 5583 | G13B_A | D6B_A  | G1B_R  | E12B_A | 1.3E-06 | 4.1E-06 | 2.170E-06 | 6.079E-07 |
| 5584 | Y10B_A | E18B_A | F19B_A | V24B_T | 1.5E-06 | 3.6E-06 | 2.170E-06 | 4.932E-07 |
| 5585 | S8B_A  | G13B_W | E18B_A | S9B_A  | 1.3E-06 | 4.6E-06 | 2.170E-06 | 7.547E-07 |
| 5586 | G13B_A | E18B_A | F19B_Q | G1B_A  | 9.1E-07 | 3.7E-06 | 2.170E-06 | 6.348E-07 |
| 5587 | Y10B_A | S8B_A  | F19B_W | L23B_Q | 4.2E-07 | 4.8E-06 | 2.170E-06 | 1.125E-06 |
| 5588 | S8B_A  | D6B_A  | E18B_A | V24B_Q | 9.5E-07 | 3.2E-06 | 2.172E-06 | 6.512E-07 |
| 5589 | G13B_A | V7B_A  | G1B_R  | F19B_W | 9.9E-07 | 4.0E-06 | 2.175E-06 | 9.177E-07 |
| 5590 | Y10B_A | V7B_A  | V24B_N | G1B_A  | 1.3E-06 | 3.6E-06 | 2.175E-06 | 5.794E-07 |
| 5591 | S8B_A  | D6B_A  | G13B_W | E12B_A | 1.4E-06 | 3.2E-06 | 2.175E-06 | 4.529E-07 |
| 5592 | S8B_A  | D6B_A  | V24B_N | G1B_A  | 9.1E-07 | 3.9E-06 | 2.175E-06 | 6.933E-07 |
| 5593 | G13B_A | S8B_A  | L11B_A | V24B_T | 1.2E-06 | 3.6E-06 | 2.175E-06 | 6.672E-07 |
| 5594 | G13B_A | Y10B_A | D6B_A  | V24B_N | 1.0E-06 | 4.1E-06 | 2.175E-06 | 8.194E-07 |
| 5595 | G13B_A | S5B_A  | F19B_Q | G1B_A  | 7.8E-07 | 3.2E-06 | 2.179E-06 | 6.939E-07 |
| 5596 | S8B_A  | D6B_A  | V7B_A  | L23B_Q | 1.1E-06 | 4.2E-06 | 2.180E-06 | 8.154E-07 |
| 5597 | Y10B_A | S8B_A  | G1B_R  | V24B_Q | 1.1E-06 | 3.8E-06 | 2.180E-06 | 6.622E-07 |
| 5598 | G13B_A | D6B_A  | K17B_S | G1B_A  | 1.3E-06 | 3.9E-06 | 2.180E-06 | 5.988E-07 |
| 5599 | G13B_A | S9B_A  | Q14B_A | E12B_A | 1.3E-06 | 3.2E-06 | 2.180E-06 | 4.348E-07 |
| 5600 | Y10B_A | E18B_T | T4B_A  | K17B_S | 1.3E-06 | 3.4E-06 | 2.180E-06 | 5.908E-07 |
| 5601 | Y10B_A | F19B_W | T4B_A  | L23B_R | 1.0E-06 | 3.9E-06 | 2.180E-06 | 7.641E-07 |
| 5602 | G13B_A | S8B_A  | V7B_A  | L23B_R | 1.1E-06 | 4.3E-06 | 2.180E-06 | 8.588E-07 |
| 5603 | Y10B_A | S8B_A  | S9B_A  | K17B_S | 1.3E-06 | 3.2E-06 | 2.180E-06 | 5.327E-07 |
| 5604 | Y10B_A | A16B_N | L23B_Q | F19B_A | 4.3E-07 | 3.6E-06 | 2.181E-06 | 8.022E-07 |
| 5605 | G13B_A | A16B_N | T4B_A  | V24B_Q | 4.1E-07 | 3.6E-06 | 2.181E-06 | 9.413E-07 |
| 5606 | Y10B_A | G13B_W | S5B_A  | L23B_R | 1.1E-06 | 4.0E-06 | 2.185E-06 | 6.507E-07 |
| 5607 | Y10B_A | G13B_W | E18B_T | T2B_A  | 1.6E-06 | 2.9E-06 | 2.185E-06 | 3.787E-07 |
| 5608 | G13B_A | G1B_R  | S5B_A  | L23B_Q | 1.3E-06 | 4.2E-06 | 2.185E-06 | 7.975E-07 |
| 5609 | G13B_A | L11B_A | G1B_R  | E12B_A | 1.4E-06 | 3.3E-06 | 2.185E-06 | 4.955E-07 |
| 5610 | G13B_A | V7B_A  | A16B_N | F19B_W | 5.6E-07 | 3.9E-06 | 2.185E-06 | 9.673E-07 |
| 5611 | S8B_A  | V7B_A  | A16B_N | L23B_R | 4.4E-07 | 4.5E-06 | 2.189E-06 | 1.174E-06 |
| 5612 | S8B_A  | D6B_A  | F3B_A  | V24B_Q | 1.2E-06 | 3.9E-06 | 2.190E-06 | 6.569E-07 |
| 5613 | G13B_A | E18B_A | G1B_R  | F19B_W | 1.3E-06 | 4.2E-06 | 2.190E-06 | 7.383E-07 |
| 5614 | G13B_A | D6B_A  | V24B_T | T2B_A  | 1.5E-06 | 3.2E-06 | 2.190E-06 | 5.046E-07 |
| 5615 | Y10B_A | F3B_A  | L11B_A | F19B_Q | 9.5E-07 | 4.3E-06 | 2.190E-06 | 8.762E-07 |

|      |        |        |        |        |         |         |           |           |
|------|--------|--------|--------|--------|---------|---------|-----------|-----------|
| 5616 | G13B_A | D6B_A  | F3B_A  | S9B_A  | 1.5E-06 | 3.2E-06 | 2.190E-06 | 3.932E-07 |
| 5617 | S8B_A  | G13B_W | K17B_A | V24B_T | 1.7E-06 | 3.1E-06 | 2.190E-06 | 3.582E-07 |
| 5618 | G13B_A | D6B_A  | F19B_A | E12B_A | 1.4E-06 | 3.6E-06 | 2.190E-06 | 4.800E-07 |
| 5619 | G13B_A | A16B_N | L23B_Q | T2B_A  | 7.2E-07 | 4.1E-06 | 2.191E-06 | 9.371E-07 |
| 5620 | Y10B_A | K17B_A | F19B_Q | L23B_R | 9.8E-07 | 4.9E-06 | 2.194E-06 | 8.366E-07 |
| 5621 | Y10B_A | D6B_A  | F19B_W | K17B_S | 9.8E-07 | 3.3E-06 | 2.194E-06 | 6.851E-07 |
| 5622 | Y10B_A | L11B_A | F19B_W | E12B_A | 1.4E-06 | 3.3E-06 | 2.195E-06 | 5.624E-07 |
| 5623 | G13B_A | E18B_A | G1B_R  | S9B_A  | 1.1E-06 | 4.0E-06 | 2.195E-06 | 5.871E-07 |
| 5624 | G13B_A | V24B_T | Q14B_A | G1B_A  | 1.3E-06 | 4.0E-06 | 2.195E-06 | 6.549E-07 |
| 5625 | Y10B_A | F19B_Q | T2B_A  | E12B_A | 6.2E-07 | 6.1E-06 | 2.196E-06 | 1.107E-06 |
| 5626 | G13B_A | V7B_A  | A16B_N | E12B_A | 5.0E-07 | 3.5E-06 | 2.197E-06 | 8.779E-07 |
| 5627 | S8B_A  | D6B_A  | F19B_A | V24B_Q | 1.1E-06 | 3.4E-06 | 2.200E-06 | 6.061E-07 |
| 5628 | G13B_A | L11B_A | K17B_A | L23B_Q | 1.1E-06 | 3.1E-06 | 2.200E-06 | 4.316E-07 |
| 5629 | G13B_A | Y10B_A | E18B_T | E12B_A | 1.2E-06 | 4.4E-06 | 2.200E-06 | 7.384E-07 |
| 5630 | G13B_A | E18B_T | S5B_A  | F19B_W | 1.1E-06 | 5.5E-06 | 2.200E-06 | 1.114E-06 |
| 5631 | Y10B_A | K17B_S | T2B_A  | E12B_A | 1.3E-06 | 3.8E-06 | 2.200E-06 | 7.726E-07 |
| 5632 | Y10B_A | D6B_A  | F19B_Q | E12B_A | 7.6E-07 | 3.4E-06 | 2.203E-06 | 7.139E-07 |
| 5633 | Y10B_A | F3B_A  | L23B_Q | G1B_A  | 1.4E-06 | 4.5E-06 | 2.205E-06 | 7.681E-07 |
| 5634 | Y10B_A | E18B_A | V24B_T | G1B_A  | 1.4E-06 | 3.3E-06 | 2.205E-06 | 5.336E-07 |
| 5635 | G13B_A | Y10B_A | V7B_A  | V24B_T | 1.2E-06 | 3.5E-06 | 2.205E-06 | 5.925E-07 |
| 5636 | G13B_A | A16B_N | E18B_T | G1B_R  | 4.4E-07 | 3.9E-06 | 2.205E-06 | 9.604E-07 |
| 5637 | G13B_A | Y10B_A | E18B_A | V24B_N | 1.2E-06 | 3.7E-06 | 2.205E-06 | 5.689E-07 |
| 5638 | S8B_A  | D6B_A  | L11B_A | V24B_N | 1.0E-06 | 3.2E-06 | 2.205E-06 | 6.724E-07 |
| 5639 | G13B_A | Y10B_A | D6B_A  | V24B_T | 1.4E-06 | 3.3E-06 | 2.205E-06 | 4.979E-07 |
| 5640 | G13B_A | A16B_N | K17B_S | F19B_A | 7.6E-07 | 4.4E-06 | 2.208E-06 | 8.883E-07 |
| 5641 | G13B_A | D6B_A  | V24B_Q | Q14B_A | 1.0E-06 | 3.7E-06 | 2.210E-06 | 6.257E-07 |
| 5642 | G13B_A | E18B_A | T4B_A  | L23B_R | 1.3E-06 | 3.4E-06 | 2.210E-06 | 5.486E-07 |
| 5643 | Y10B_A | S9B_A  | F19B_A | E12B_A | 1.1E-06 | 3.8E-06 | 2.210E-06 | 7.196E-07 |
| 5644 | Y10B_A | V7B_A  | L23B_R | G1B_A  | 1.2E-06 | 4.3E-06 | 2.210E-06 | 7.518E-07 |
| 5645 | Y10B_A | I20B_N | S5B_A  | K17B_A | 1.2E-06 | 4.4E-06 | 2.210E-06 | 7.276E-07 |
| 5646 | Y10B_A | G13B_W | E18B_T | S5B_A  | 1.1E-06 | 4.1E-06 | 2.210E-06 | 8.699E-07 |
| 5647 | G13B_A | L23B_R | F19B_A | T2B_A  | 1.3E-06 | 4.0E-06 | 2.210E-06 | 6.882E-07 |
| 5648 | G13B_A | V7B_A  | F3B_A  | E12B_A | 1.1E-06 | 3.9E-06 | 2.210E-06 | 6.456E-07 |
| 5649 | G13B_A | D6B_A  | S5B_A  | F19B_Q | 1.2E-06 | 3.3E-06 | 2.210E-06 | 6.431E-07 |
| 5650 | Y10B_A | E18B_A | G1B_R  | V24B_T | 1.4E-06 | 3.2E-06 | 2.210E-06 | 4.701E-07 |
| 5651 | Y10B_A | V7B_A  | A16B_N | L23B_Q | 4.3E-07 | 5.7E-06 | 2.211E-06 | 1.245E-06 |
| 5652 | G13B_A | S5B_A  | Q14B_A | V24B_N | 8.8E-07 | 4.1E-06 | 2.214E-06 | 7.800E-07 |
| 5653 | G13B_A | F3B_A  | L11B_A | S9B_A  | 1.4E-06 | 3.3E-06 | 2.215E-06 | 5.334E-07 |
| 5654 | Y10B_A | I20B_Q | K17B_A | T2B_A  | 1.2E-06 | 3.8E-06 | 2.215E-06 | 6.327E-07 |
| 5655 | Y10B_A | F3B_A  | F19B_W | E12B_A | 1.2E-06 | 4.6E-06 | 2.215E-06 | 7.645E-07 |
| 5656 | Y10B_A | S8B_A  | F3B_A  | V24B_N | 1.3E-06 | 3.3E-06 | 2.215E-06 | 5.274E-07 |
| 5657 | G13B_A | V7B_A  | L23B_R | Q14B_A | 1.2E-06 | 3.6E-06 | 2.215E-06 | 5.678E-07 |
| 5658 | G13B_A | Y10B_A | F3B_A  | L23B_Q | 1.2E-06 | 3.3E-06 | 2.215E-06 | 6.226E-07 |
| 5659 | Y10B_A | E18B_A | F19B_A | V24B_Q | 1.0E-06 | 5.4E-06 | 2.215E-06 | 1.011E-06 |
| 5660 | Y10B_A | A16B_N | V24B_T | G1B_A  | 6.5E-07 | 4.2E-06 | 2.216E-06 | 8.423E-07 |
| 5661 | Y10B_A | A16B_N | S9B_A  | E12B_A | 5.4E-07 | 4.2E-06 | 2.217E-06 | 1.082E-06 |
| 5662 | Y10B_A | S8B_A  | F19B_W | L23B_R | 1.3E-06 | 4.5E-06 | 2.220E-06 | 8.069E-07 |
| 5663 | G13B_A | L11B_A | T4B_A  | V24B_T | 1.3E-06 | 3.8E-06 | 2.220E-06 | 6.152E-07 |
| 5664 | G13B_A | T4B_A  | L23B_R | G1B_A  | 1.3E-06 | 3.3E-06 | 2.220E-06 | 5.493E-07 |
| 5665 | G13B_A | L11B_A | K17B_S | F19B_A | 1.3E-06 | 4.1E-06 | 2.220E-06 | 8.147E-07 |
| 5666 | Y10B_A | E18B_T | K17B_A | L23B_R | 1.0E-06 | 3.8E-06 | 2.220E-06 | 6.717E-07 |
| 5667 | Y10B_A | F3B_A  | V24B_Q | G1B_A  | 9.6E-07 | 4.5E-06 | 2.223E-06 | 7.440E-07 |

|      |        |        |        |        |         |         |           |           |
|------|--------|--------|--------|--------|---------|---------|-----------|-----------|
| 5668 | G13B_A | V7B_A  | K17B_A | V24B_Q | 1.2E-06 | 3.2E-06 | 2.225E-06 | 5.875E-07 |
| 5669 | G13B_A | S8B_A  | E18B_T | F19B_W | 6.9E-07 | 5.3E-06 | 2.225E-06 | 1.071E-06 |
| 5670 | G13B_A | V7B_A  | G1B_R  | E12B_A | 1.2E-06 | 4.3E-06 | 2.225E-06 | 7.268E-07 |
| 5671 | G13B_A | E18B_A | S5B_A  | V24B_Q | 1.4E-06 | 3.9E-06 | 2.225E-06 | 6.688E-07 |
| 5672 | G13B_A | A16B_N | E18B_T | F19B_A | 6.0E-07 | 4.6E-06 | 2.228E-06 | 1.030E-06 |
| 5673 | Y10B_A | E18B_A | L23B_R | G1B_A  | 1.3E-06 | 3.4E-06 | 2.230E-06 | 6.088E-07 |
| 5674 | G13B_A | S8B_A  | D6B_A  | V24B_N | 1.0E-06 | 3.9E-06 | 2.230E-06 | 6.554E-07 |
| 5675 | Y10B_A | V7B_A  | S9B_A  | E12B_A | 1.2E-06 | 4.2E-06 | 2.230E-06 | 6.883E-07 |
| 5676 | Y10B_A | S8B_A  | I20B_N | K17B_A | 1.4E-06 | 3.2E-06 | 2.230E-06 | 5.090E-07 |
| 5677 | S8B_A  | G13B_W | S5B_A  | F19B_Q | 9.4E-07 | 3.8E-06 | 2.232E-06 | 7.711E-07 |
| 5678 | Y10B_A | A16B_N | F19B_A | V24B_N | 1.0E-06 | 4.1E-06 | 2.235E-06 | 7.775E-07 |
| 5679 | G13B_A | D6B_A  | E18B_T | G1B_R  | 1.1E-06 | 3.8E-06 | 2.235E-06 | 7.929E-07 |
| 5680 | Y10B_A | G1B_R  | V24B_T | T2B_A  | 1.0E-06 | 3.4E-06 | 2.235E-06 | 5.509E-07 |
| 5681 | Y10B_A | A16B_N | G1B_R  | K17B_S | 4.4E-07 | 4.3E-06 | 2.235E-06 | 1.065E-06 |
| 5682 | G13B_A | S5B_A  | L23B_R | G1B_A  | 1.2E-06 | 3.7E-06 | 2.235E-06 | 5.833E-07 |
| 5683 | Y10B_A | G13B_W | K17B_A | F19B_Q | 1.0E-06 | 3.1E-06 | 2.235E-06 | 6.580E-07 |
| 5684 | G13B_A | D6B_A  | V24B_Q | T2B_A  | 1.0E-06 | 4.7E-06 | 2.235E-06 | 7.393E-07 |
| 5685 | Y10B_A | F3B_A  | F19B_Q | G1B_A  | 4.8E-07 | 4.1E-06 | 2.239E-06 | 8.837E-07 |
| 5686 | G13B_A | D6B_A  | S5B_A  | V24B_N | 1.1E-06 | 3.3E-06 | 2.240E-06 | 6.261E-07 |
| 5687 | G13B_A | L23B_R | Q14B_A | G1B_A  | 1.3E-06 | 5.5E-06 | 2.240E-06 | 9.708E-07 |
| 5688 | G13B_A | E18B_A | K17B_S | F19B_A | 1.3E-06 | 3.6E-06 | 2.240E-06 | 5.651E-07 |
| 5689 | G13B_A | Y10B_A | A16B_N | V24B_N | 1.2E-06 | 4.0E-06 | 2.240E-06 | 7.401E-07 |
| 5690 | G13B_A | E18B_A | K17B_S | G1B_A  | 1.4E-06 | 3.2E-06 | 2.240E-06 | 5.325E-07 |
| 5691 | G13B_A | E18B_A | L23B_R | T2B_A  | 1.6E-06 | 3.2E-06 | 2.240E-06 | 5.286E-07 |
| 5692 | G13B_A | S8B_A  | F3B_A  | F19B_Q | 8.1E-07 | 4.5E-06 | 2.240E-06 | 8.724E-07 |
| 5693 | S8B_A  | D6B_A  | S9B_A  | E12B_A | 1.3E-06 | 4.5E-06 | 2.240E-06 | 7.294E-07 |
| 5694 | G13B_A | L11B_A | K17B_A | V24B_N | 1.3E-06 | 3.5E-06 | 2.245E-06 | 5.772E-07 |
| 5695 | G13B_A | L11B_A | F19B_Q | Q14B_A | 1.2E-06 | 4.7E-06 | 2.245E-06 | 1.103E-06 |
| 5696 | G13B_A | Y10B_A | F3B_A  | V24B_T | 1.4E-06 | 3.8E-06 | 2.245E-06 | 6.203E-07 |
| 5697 | Y10B_A | G13B_W | E18B_A | E12B_A | 1.8E-06 | 3.2E-06 | 2.245E-06 | 3.873E-07 |
| 5698 | Y10B_A | V24B_Q | Q14B_A | G1B_A  | 1.1E-06 | 3.0E-06 | 2.245E-06 | 4.673E-07 |
| 5699 | Y10B_A | T4B_A  | F19B_A | V24B_N | 1.3E-06 | 4.8E-06 | 2.245E-06 | 8.624E-07 |
| 5700 | G13B_A | S5B_A  | T2B_A  | V24B_N | 1.0E-06 | 3.2E-06 | 2.250E-06 | 5.125E-07 |
| 5701 | G13B_A | V7B_A  | F3B_A  | F19B_W | 1.1E-06 | 4.2E-06 | 2.250E-06 | 8.376E-07 |
| 5702 | G13B_A | G1B_R  | S5B_A  | F19B_Q | 1.2E-06 | 4.4E-06 | 2.250E-06 | 8.166E-07 |
| 5703 | Y10B_A | G1B_R  | Q14B_A | V24B_N | 1.4E-06 | 3.3E-06 | 2.250E-06 | 4.958E-07 |
| 5704 | Y10B_A | D6B_A  | L23B_R | G1B_A  | 1.5E-06 | 3.4E-06 | 2.250E-06 | 5.366E-07 |
| 5705 | G13B_A | S5B_A  | L23B_R | F19B_A | 1.7E-06 | 4.0E-06 | 2.250E-06 | 6.126E-07 |
| 5706 | Y10B_A | E18B_A | G1B_R  | L23B_R | 1.5E-06 | 3.3E-06 | 2.255E-06 | 4.883E-07 |
| 5707 | G13B_A | F3B_A  | L23B_R | Q14B_A | 1.5E-06 | 3.8E-06 | 2.255E-06 | 5.969E-07 |
| 5708 | G13B_A | K17B_S | F19B_A | Q14B_A | 1.4E-06 | 3.6E-06 | 2.255E-06 | 6.203E-07 |
| 5709 | G13B_A | S8B_A  | A16B_N | L23B_Q | 5.9E-07 | 5.7E-06 | 2.255E-06 | 1.023E-06 |
| 5710 | Y10B_A | D6B_A  | V7B_A  | L23B_R | 1.3E-06 | 3.0E-06 | 2.255E-06 | 4.968E-07 |
| 5711 | G13B_A | E18B_T | L11B_A | F19B_A | 1.3E-06 | 3.9E-06 | 2.260E-06 | 6.785E-07 |
| 5712 | Y10B_A | F19B_Q | Q14B_A | E12B_A | 1.0E-06 | 5.1E-06 | 2.260E-06 | 8.941E-07 |
| 5713 | Y10B_A | G13B_W | S5B_A  | F19B_Q | 1.3E-06 | 4.1E-06 | 2.260E-06 | 9.052E-07 |
| 5714 | Y10B_A | S8B_A  | E18B_T | F19B_Q | 8.3E-07 | 3.9E-06 | 2.261E-06 | 9.355E-07 |
| 5715 | G13B_A | D6B_A  | K17B_S | F19B_A | 6.8E-07 | 3.7E-06 | 2.263E-06 | 7.622E-07 |
| 5716 | G13B_A | S8B_A  | A16B_N | V24B_T | 7.5E-07 | 4.2E-06 | 2.264E-06 | 1.016E-06 |
| 5717 | Y10B_A | F3B_A  | A16B_N | L23B_Q | 5.9E-07 | 4.1E-06 | 2.265E-06 | 9.014E-07 |
| 5718 | G13B_A | E18B_A | L23B_Q | Q14B_A | 1.3E-06 | 4.2E-06 | 2.265E-06 | 6.839E-07 |
| 5719 | Y10B_A | S5B_A  | S9B_A  | K17B_S | 1.2E-06 | 3.4E-06 | 2.265E-06 | 6.046E-07 |

|      |        |        |        |        |         |         |           |           |
|------|--------|--------|--------|--------|---------|---------|-----------|-----------|
| 5720 | G13B_A | G1B_R  | K17B_A | V24B_N | 1.1E-06 | 3.6E-06 | 2.265E-06 | 7.021E-07 |
| 5721 | G13B_A | F3B_A  | E12B_A | G1B_A  | 1.3E-06 | 3.7E-06 | 2.265E-06 | 6.310E-07 |
| 5722 | G13B_A | A16B_N | E18B_A | K17B_S | 9.5E-07 | 3.9E-06 | 2.267E-06 | 8.649E-07 |
| 5723 | S8B_A  | D6B_A  | F19B_A | V24B_T | 1.3E-06 | 3.5E-06 | 2.270E-06 | 6.473E-07 |
| 5724 | G13B_A | D6B_A  | S5B_A  | L23B_Q | 1.1E-06 | 3.2E-06 | 2.270E-06 | 6.225E-07 |
| 5725 | G13B_A | G1B_R  | F19B_Q | Q14B_A | 1.1E-06 | 3.8E-06 | 2.270E-06 | 8.105E-07 |
| 5726 | Y10B_A | D6B_A  | L11B_A | V24B_T | 1.5E-06 | 3.0E-06 | 2.270E-06 | 3.511E-07 |
| 5727 | Y10B_A | S9B_A  | K17B_S | T2B_A  | 1.2E-06 | 3.8E-06 | 2.270E-06 | 8.862E-07 |
| 5728 | S8B_A  | G13B_W | T4B_A  | K17B_S | 1.7E-06 | 4.8E-06 | 2.275E-06 | 6.927E-07 |
| 5729 | G13B_A | S8B_A  | Q14B_A | V24B_N | 1.3E-06 | 3.9E-06 | 2.275E-06 | 6.711E-07 |
| 5730 | Y10B_A | S8B_A  | G13B_W | E18B_T | 1.3E-06 | 4.8E-06 | 2.275E-06 | 9.107E-07 |
| 5731 | Y10B_A | V7B_A  | E18B_A | V24B_T | 1.3E-06 | 3.5E-06 | 2.275E-06 | 5.543E-07 |
| 5732 | G13B_A | S8B_A  | G1B_R  | K17B_S | 1.2E-06 | 5.7E-06 | 2.275E-06 | 9.792E-07 |
| 5733 | Y10B_A | I20B_N | K17B_A | T4B_A  | 1.7E-06 | 3.4E-06 | 2.275E-06 | 4.290E-07 |
| 5734 | Y10B_A | D6B_A  | A16B_N | L23B_Q | 5.9E-07 | 4.9E-06 | 2.278E-06 | 1.063E-06 |
| 5735 | G13B_A | E18B_A | S5B_A  | L23B_R | 4.9E-07 | 3.7E-06 | 2.279E-06 | 7.632E-07 |
| 5736 | G13B_A | E18B_A | L23B_R | Q14B_A | 9.8E-07 | 4.1E-06 | 2.279E-06 | 7.754E-07 |
| 5737 | G13B_A | D6B_A  | E12B_A | G1B_A  | 1.6E-06 | 3.2E-06 | 2.280E-06 | 5.001E-07 |
| 5738 | Y10B_A | K17B_A | S9B_A  | V24B_T | 1.4E-06 | 3.4E-06 | 2.280E-06 | 4.905E-07 |
| 5739 | G13B_A | Y10B_A | E18B_A | L23B_R | 1.3E-06 | 3.0E-06 | 2.280E-06 | 4.420E-07 |
| 5740 | Y10B_A | S8B_A  | L11B_A | V24B_Q | 1.2E-06 | 3.9E-06 | 2.280E-06 | 6.795E-07 |
| 5741 | G13B_A | Y10B_A | V24B_Q | T2B_A  | 1.3E-06 | 4.1E-06 | 2.280E-06 | 7.838E-07 |
| 5742 | Y10B_A | T4B_A  | F19B_Q | S9B_A  | 1.3E-06 | 3.9E-06 | 2.280E-06 | 6.948E-07 |
| 5743 | Y10B_A | F3B_A  | E18B_A | L23B_R | 1.3E-06 | 3.6E-06 | 2.280E-06 | 5.531E-07 |
| 5744 | Y10B_A | D6B_A  | E18B_T | F19B_W | 8.8E-07 | 3.5E-06 | 2.284E-06 | 6.300E-07 |
| 5745 | G13B_A | Y10B_A | S8B_A  | L23B_Q | 1.4E-06 | 3.7E-06 | 2.285E-06 | 6.235E-07 |
| 5746 | Y10B_A | F3B_A  | G1B_R  | K17B_S | 1.4E-06 | 3.4E-06 | 2.285E-06 | 5.133E-07 |
| 5747 | Y10B_A | E18B_T | S5B_A  | K17B_S | 1.4E-06 | 4.0E-06 | 2.285E-06 | 6.976E-07 |
| 5748 | Y10B_A | L11B_A | E18B_A | L23B_Q | 1.2E-06 | 3.6E-06 | 2.285E-06 | 6.335E-07 |
| 5749 | G13B_A | K17B_A | V24B_N | G1B_A  | 1.3E-06 | 3.9E-06 | 2.285E-06 | 7.081E-07 |
| 5750 | G13B_A | S8B_A  | G1B_R  | F19B_Q | 1.0E-06 | 4.0E-06 | 2.285E-06 | 8.839E-07 |
| 5751 | G13B_A | S8B_A  | L11B_A | F19B_Q | 9.2E-07 | 5.2E-06 | 2.286E-06 | 9.908E-07 |
| 5752 | Y10B_A | V7B_A  | T4B_A  | L23B_Q | 9.3E-07 | 3.5E-06 | 2.287E-06 | 6.982E-07 |
| 5753 | G13B_A | A16B_N | S5B_A  | K17B_S | 3.4E-07 | 4.1E-06 | 2.288E-06 | 1.098E-06 |
| 5754 | G13B_A | Y10B_A | A16B_N | V24B_Q | 7.6E-07 | 3.3E-06 | 2.288E-06 | 6.274E-07 |
| 5755 | Y10B_A | E18B_T | K17B_A | V24B_N | 1.4E-06 | 4.4E-06 | 2.290E-06 | 8.867E-07 |
| 5756 | G13B_A | F3B_A  | T4B_A  | F19B_Q | 1.1E-06 | 5.2E-06 | 2.290E-06 | 1.227E-06 |
| 5757 | Y10B_A | F3B_A  | A16B_N | L23B_R | 1.0E-06 | 3.9E-06 | 2.290E-06 | 7.539E-07 |
| 5758 | S8B_A  | D6B_A  | E18B_A | V24B_T | 1.5E-06 | 3.4E-06 | 2.290E-06 | 5.170E-07 |
| 5759 | Y10B_A | F19B_A | T2B_A  | V24B_N | 1.5E-06 | 3.7E-06 | 2.290E-06 | 5.776E-07 |
| 5760 | Y10B_A | T4B_A  | F19B_A | V24B_Q | 1.3E-06 | 4.6E-06 | 2.295E-06 | 6.692E-07 |
| 5761 | G13B_A | S8B_A  | V7B_A  | K17B_S | 1.1E-06 | 3.5E-06 | 2.295E-06 | 6.168E-07 |
| 5762 | G13B_A | D6B_A  | T4B_A  | V24B_T | 1.7E-06 | 3.5E-06 | 2.295E-06 | 5.558E-07 |
| 5763 | G13B_A | F3B_A  | L11B_A | F19B_W | 1.3E-06 | 3.4E-06 | 2.295E-06 | 6.770E-07 |
| 5764 | G13B_A | E18B_T | F19B_A | G1B_A  | 1.4E-06 | 6.0E-06 | 2.295E-06 | 1.035E-06 |
| 5765 | Y10B_A | I20B_T | K17B_A | T4B_A  | 1.4E-06 | 3.4E-06 | 2.295E-06 | 4.828E-07 |
| 5766 | Y10B_A | D6B_A  | E18B_A | V24B_N | 1.3E-06 | 3.0E-06 | 2.295E-06 | 4.718E-07 |
| 5767 | G13B_A | S8B_A  | D6B_A  | L23B_R | 1.5E-06 | 3.0E-06 | 2.295E-06 | 4.594E-07 |
| 5768 | S8B_A  | V7B_A  | F3B_A  | K17B_S | 1.5E-06 | 3.3E-06 | 2.295E-06 | 5.296E-07 |
| 5769 | Y10B_A | E18B_T | F19B_Q | T2B_A  | 7.2E-07 | 5.0E-06 | 2.295E-06 | 1.181E-06 |
| 5770 | G13B_A | S8B_A  | E18B_A | V24B_T | 1.7E-06 | 3.2E-06 | 2.295E-06 | 5.021E-07 |
| 5771 | G13B_A | S8B_A  | A16B_N | F19B_Q | 4.1E-07 | 5.8E-06 | 2.296E-06 | 1.266E-06 |



|      |        |        |        |        |         |         |           |           |
|------|--------|--------|--------|--------|---------|---------|-----------|-----------|
| 5772 | G13B_A | D6B_A  | F3B_A  | E18B_T | 1.4E-06 | 3.9E-06 | 2.300E-06 | 7.152E-07 |
| 5773 | Y10B_A | S8B_A  | G13B_W | S9B_A  | 1.3E-06 | 3.9E-06 | 2.300E-06 | 5.991E-07 |
| 5774 | Y10B_A | E18B_A | L23B_Q | F19B_A | 1.3E-06 | 5.1E-06 | 2.300E-06 | 9.684E-07 |
| 5775 | G13B_A | D6B_A  | T4B_A  | V24B_Q | 1.7E-06 | 3.2E-06 | 2.300E-06 | 4.449E-07 |
| 5776 | Y10B_A | L23B_Q | F19B_A | T2B_A  | 1.2E-06 | 3.7E-06 | 2.300E-06 | 7.588E-07 |
| 5777 | G13B_A | E18B_A | E12B_A | G1B_A  | 1.5E-06 | 3.7E-06 | 2.300E-06 | 5.016E-07 |
| 5778 | Y10B_A | E18B_T | K17B_S | Q14B_A | 1.1E-06 | 4.7E-06 | 2.300E-06 | 8.706E-07 |
| 5779 | S8B_A  | D6B_A  | V7B_A  | V24B_N | 1.7E-06 | 3.3E-06 | 2.300E-06 | 4.877E-07 |
| 5780 | S8B_A  | D6B_A  | L11B_A | L23B_Q | 1.3E-06 | 3.6E-06 | 2.300E-06 | 6.951E-07 |
| 5781 | G13B_A | F3B_A  | S5B_A  | L23B_R | 1.1E-06 | 4.5E-06 | 2.300E-06 | 8.398E-07 |
| 5782 | Y10B_A | E18B_A | L23B_Q | G1B_A  | 1.1E-06 | 3.7E-06 | 2.300E-06 | 7.581E-07 |
| 5783 | G13B_A | F3B_A  | F19B_Q | Q14B_A | 9.6E-07 | 4.3E-06 | 2.303E-06 | 7.832E-07 |
| 5784 | Y10B_A | V7B_A  | L23B_R | F19B_A | 1.1E-06 | 3.3E-06 | 2.305E-06 | 5.586E-07 |
| 5785 | G13B_A | Y10B_A | E18B_A | L23B_Q | 1.3E-06 | 3.6E-06 | 2.305E-06 | 6.160E-07 |
| 5786 | G13B_A | S8B_A  | K17B_S | F19B_A | 1.4E-06 | 4.1E-06 | 2.305E-06 | 6.533E-07 |
| 5787 | Y10B_A | K17B_S | Q14B_A | E12B_A | 1.3E-06 | 4.3E-06 | 2.305E-06 | 6.878E-07 |
| 5788 | Y10B_A | D6B_A  | E18B_A | L23B_R | 1.4E-06 | 3.8E-06 | 2.305E-06 | 6.739E-07 |
| 5789 | G13B_A | D6B_A  | F3B_A  | F19B_W | 1.5E-06 | 4.0E-06 | 2.305E-06 | 6.573E-07 |
| 5790 | G13B_A | F19B_W | Q14B_A | E12B_A | 1.3E-06 | 4.8E-06 | 2.305E-06 | 7.494E-07 |
| 5791 | Y10B_A | G13B_W | A16B_N | L11B_A | 4.3E-07 | 3.8E-06 | 2.306E-06 | 1.055E-06 |
| 5792 | G13B_A | V7B_A  | S5B_A  | L23B_R | 8.3E-07 | 4.8E-06 | 2.307E-06 | 1.056E-06 |
| 5793 | G13B_A | Y10B_A | E18B_A | V24B_T | 1.7E-06 | 3.1E-06 | 2.310E-06 | 4.599E-07 |
| 5794 | S8B_A  | D6B_A  | Q14B_A | V24B_N | 1.2E-06 | 3.0E-06 | 2.310E-06 | 5.937E-07 |
| 5795 | G13B_A | E18B_A | S5B_A  | L23B_Q | 1.3E-06 | 4.2E-06 | 2.310E-06 | 7.115E-07 |
| 5796 | Y10B_A | T4B_A  | F19B_Q | E12B_A | 1.0E-06 | 4.2E-06 | 2.310E-06 | 8.391E-07 |
| 5797 | Y10B_A | E18B_T | K17B_A | V24B_T | 1.4E-06 | 3.6E-06 | 2.310E-06 | 6.365E-07 |
| 5798 | Y10B_A | A16B_N | L11B_A | L23B_R | 3.9E-07 | 5.2E-06 | 2.312E-06 | 1.272E-06 |
| 5799 | G13B_A | A16B_N | S9B_A  | G1B_A  | 6.7E-07 | 3.5E-06 | 2.313E-06 | 7.575E-07 |
| 5800 | Y10B_A | F3B_A  | V24B_T | Q14B_A | 1.7E-06 | 3.3E-06 | 2.315E-06 | 4.487E-07 |
| 5801 | G13B_A | E18B_A | V24B_Q | T2B_A  | 1.4E-06 | 3.2E-06 | 2.315E-06 | 4.171E-07 |
| 5802 | G13B_A | D6B_A  | S5B_A  | L23B_R | 1.3E-06 | 4.2E-06 | 2.315E-06 | 7.386E-07 |
| 5803 | Y10B_A | L11B_A | T2B_A  | V24B_N | 1.1E-06 | 3.3E-06 | 2.315E-06 | 6.235E-07 |
| 5804 | G13B_A | V7B_A  | E18B_A | K17B_S | 1.1E-06 | 4.8E-06 | 2.320E-06 | 8.895E-07 |
| 5805 | Y10B_A | G13B_W | S5B_A  | K17B_S | 1.4E-06 | 3.3E-06 | 2.320E-06 | 5.996E-07 |
| 5806 | Y10B_A | S5B_A  | F19B_Q | E12B_A | 1.5E-06 | 3.5E-06 | 2.320E-06 | 5.483E-07 |
| 5807 | Y10B_A | G1B_R  | V24B_Q | T2B_A  | 1.2E-06 | 3.8E-06 | 2.320E-06 | 7.076E-07 |
| 5808 | Y10B_A | E18B_T | T4B_A  | F19B_Q | 9.8E-07 | 4.1E-06 | 2.324E-06 | 9.747E-07 |
| 5809 | Y10B_A | V7B_A  | F19B_Q | G1B_A  | 1.3E-06 | 3.6E-06 | 2.325E-06 | 6.750E-07 |
| 5810 | G13B_A | F19B_A | E12B_A | G1B_A  | 1.3E-06 | 3.6E-06 | 2.325E-06 | 6.472E-07 |
| 5811 | Y10B_A | D6B_A  | L11B_A | L23B_R | 1.3E-06 | 4.3E-06 | 2.325E-06 | 6.608E-07 |
| 5812 | S8B_A  | D6B_A  | F3B_A  | V24B_T | 1.0E-06 | 3.5E-06 | 2.325E-06 | 7.010E-07 |
| 5813 | Y10B_A | K17B_A | S9B_A  | L23B_Q | 7.8E-07 | 5.0E-06 | 2.329E-06 | 8.957E-07 |
| 5814 | Y10B_A | A16B_N | L11B_A | K17B_S | 5.0E-07 | 3.9E-06 | 2.330E-06 | 9.217E-07 |
| 5815 | S8B_A  | D6B_A  | L23B_R | F19B_A | 1.1E-06 | 4.1E-06 | 2.330E-06 | 7.328E-07 |
| 5816 | S8B_A  | D6B_A  | E18B_A | L23B_Q | 1.3E-06 | 3.1E-06 | 2.330E-06 | 5.992E-07 |
| 5817 | Y10B_A | G1B_R  | S5B_A  | V24B_T | 1.7E-06 | 3.4E-06 | 2.330E-06 | 4.305E-07 |
| 5818 | G13B_A | D6B_A  | V7B_A  | E18B_T | 1.5E-06 | 3.9E-06 | 2.330E-06 | 6.267E-07 |
| 5819 | Y10B_A | S8B_A  | G13B_W | F19B_Q | 1.4E-06 | 4.5E-06 | 2.330E-06 | 7.547E-07 |
| 5820 | G13B_A | T4B_A  | Q14B_A | V24B_N | 1.3E-06 | 3.7E-06 | 2.335E-06 | 7.250E-07 |
| 5821 | Y10B_A | D6B_A  | S9B_A  | E12B_A | 1.6E-06 | 3.7E-06 | 2.335E-06 | 6.046E-07 |
| 5822 | G13B_A | E18B_A | F19B_W | G1B_A  | 1.2E-06 | 3.4E-06 | 2.335E-06 | 6.310E-07 |
| 5823 | G13B_A | Y10B_A | L11B_A | F19B_Q | 1.3E-06 | 5.0E-06 | 2.335E-06 | 9.126E-07 |

|      |        |        |        |        |         |         |           |           |
|------|--------|--------|--------|--------|---------|---------|-----------|-----------|
| 5824 | S8B_A  | G13B_W | T4B_A  | S9B_A  | 1.6E-06 | 3.9E-06 | 2.335E-06 | 6.635E-07 |
| 5825 | G13B_A | T4B_A  | F19B_A | V24B_T | 1.1E-06 | 5.9E-06 | 2.335E-06 | 1.091E-06 |
| 5826 | G13B_A | T4B_A  | F19B_A | V24B_N | 1.3E-06 | 3.8E-06 | 2.335E-06 | 7.645E-07 |
| 5827 | Y10B_A | F3B_A  | Q14B_A | V24B_N | 1.1E-06 | 4.1E-06 | 2.335E-06 | 7.768E-07 |
| 5828 | Y10B_A | S8B_A  | I20B_S | K17B_A | 8.5E-07 | 3.8E-06 | 2.338E-06 | 6.694E-07 |
| 5829 | G13B_A | G1B_R  | K17B_A | V24B_T | 1.4E-06 | 3.9E-06 | 2.340E-06 | 6.652E-07 |
| 5830 | G13B_A | D6B_A  | L23B_Q | T2B_A  | 1.5E-06 | 4.2E-06 | 2.340E-06 | 7.877E-07 |
| 5831 | G13B_A | V7B_A  | F19B_Q | Q14B_A | 1.3E-06 | 3.5E-06 | 2.340E-06 | 6.984E-07 |
| 5832 | S8B_A  | D6B_A  | L11B_A | V24B_T | 1.4E-06 | 3.9E-06 | 2.340E-06 | 6.660E-07 |
| 5833 | G13B_A | S8B_A  | T2B_A  | V24B_N | 1.5E-06 | 4.2E-06 | 2.340E-06 | 6.460E-07 |
| 5834 | G13B_A | S5B_A  | T4B_A  | V24B_Q | 1.5E-06 | 3.9E-06 | 2.345E-06 | 5.726E-07 |
| 5835 | G13B_A | S8B_A  | S5B_A  | V24B_T | 1.6E-06 | 3.6E-06 | 2.345E-06 | 5.365E-07 |
| 5836 | S8B_A  | G13B_W | K17B_A | F19B_Q | 1.1E-06 | 4.3E-06 | 2.345E-06 | 7.654E-07 |
| 5837 | G13B_A | V7B_A  | E12B_A | G1B_A  | 1.4E-06 | 3.2E-06 | 2.345E-06 | 4.957E-07 |
| 5838 | G13B_A | A16B_N | G1B_R  | E12B_A | 2.9E-07 | 4.0E-06 | 2.345E-06 | 9.191E-07 |
| 5839 | G13B_A | K17B_A | F19B_A | V24B_T | 1.6E-06 | 4.1E-06 | 2.345E-06 | 5.934E-07 |
| 5840 | Y10B_A | D6B_A  | G13B_W | E12B_A | 1.6E-06 | 4.6E-06 | 2.345E-06 | 6.992E-07 |
| 5841 | G13B_A | F3B_A  | K17B_A | V24B_N | 1.5E-06 | 4.1E-06 | 2.345E-06 | 6.345E-07 |
| 5842 | G13B_A | E18B_T | T2B_A  | E12B_A | 1.3E-06 | 5.1E-06 | 2.345E-06 | 1.044E-06 |
| 5843 | G13B_A | Y10B_A | A16B_N | F19B_Q | 4.0E-07 | 5.0E-06 | 2.346E-06 | 1.317E-06 |
| 5844 | G13B_A | L11B_A | S5B_A  | F19B_Q | 8.8E-07 | 4.4E-06 | 2.349E-06 | 8.804E-07 |
| 5845 | Y10B_A | V7B_A  | F19B_W | E12B_A | 1.4E-06 | 4.1E-06 | 2.350E-06 | 6.653E-07 |
| 5846 | Y10B_A | S9B_A  | K17B_S | Q14B_A | 1.4E-06 | 4.0E-06 | 2.350E-06 | 7.430E-07 |
| 5847 | Y10B_A | K17B_A | F19B_W | V24B_T | 1.3E-06 | 4.3E-06 | 2.350E-06 | 9.539E-07 |
| 5848 | G13B_A | Y10B_A | F19B_W | E12B_A | 1.0E-06 | 4.1E-06 | 2.350E-06 | 8.507E-07 |
| 5849 | Y10B_A | L11B_A | G1B_R  | K17B_S | 1.3E-06 | 3.6E-06 | 2.350E-06 | 6.420E-07 |
| 5850 | G13B_A | A16B_N | E18B_A | S9B_A  | 6.1E-07 | 4.1E-06 | 2.350E-06 | 8.005E-07 |
| 5851 | S8B_A  | D6B_A  | E18B_A | V24B_N | 9.4E-07 | 5.5E-06 | 2.352E-06 | 1.001E-06 |
| 5852 | G13B_A | A16B_N | K17B_A | V24B_Q | 6.1E-07 | 3.6E-06 | 2.354E-06 | 1.027E-06 |
| 5853 | Y10B_A | A16B_N | T2B_A  | V24B_N | 3.8E-07 | 4.8E-06 | 2.355E-06 | 1.092E-06 |
| 5854 | Y10B_A | V7B_A  | F3B_A  | L23B_Q | 1.4E-06 | 3.9E-06 | 2.355E-06 | 7.466E-07 |
| 5855 | Y10B_A | I20B_T | S5B_A  | K17B_A | 1.2E-06 | 3.8E-06 | 2.355E-06 | 7.007E-07 |
| 5856 | G13B_A | K17B_A | F19B_A | V24B_Q | 1.3E-06 | 4.0E-06 | 2.355E-06 | 6.700E-07 |
| 5857 | Y10B_A | F3B_A  | L23B_R | G1B_A  | 1.7E-06 | 4.0E-06 | 2.355E-06 | 5.942E-07 |
| 5858 | G13B_A | G1B_R  | F19B_A | E12B_A | 1.6E-06 | 4.8E-06 | 2.355E-06 | 8.715E-07 |
| 5859 | Y10B_A | G13B_W | F19B_Q | Q14B_A | 1.1E-06 | 4.5E-06 | 2.355E-06 | 1.067E-06 |
| 5860 | G13B_A | D6B_A  | E18B_T | L11B_A | 1.5E-06 | 4.1E-06 | 2.355E-06 | 6.724E-07 |
| 5861 | Y10B_A | A16B_N | G1B_R  | L23B_R | 3.7E-07 | 5.2E-06 | 2.358E-06 | 1.120E-06 |
| 5862 | G13B_A | V7B_A  | A16B_N | E18B_T | 4.8E-07 | 4.2E-06 | 2.358E-06 | 1.002E-06 |
| 5863 | Y10B_A | G1B_R  | T4B_A  | L23B_Q | 1.3E-06 | 3.3E-06 | 2.360E-06 | 5.384E-07 |
| 5864 | S8B_A  | G13B_W | K17B_A | L23B_Q | 1.5E-06 | 4.3E-06 | 2.360E-06 | 7.877E-07 |
| 5865 | G13B_A | L11B_A | F19B_W | G1B_A  | 1.3E-06 | 5.2E-06 | 2.360E-06 | 9.098E-07 |
| 5866 | G13B_A | Y10B_A | D6B_A  | F19B_Q | 1.1E-06 | 3.9E-06 | 2.360E-06 | 8.268E-07 |
| 5867 | Y10B_A | S5B_A  | F19B_A | V24B_Q | 1.5E-06 | 3.7E-06 | 2.360E-06 | 6.116E-07 |
| 5868 | G13B_A | F3B_A  | A16B_N | F19B_W | 7.4E-07 | 4.6E-06 | 2.361E-06 | 1.037E-06 |
| 5869 | S8B_A  | V7B_A  | A16B_N | V24B_T | 6.7E-07 | 3.9E-06 | 2.362E-06 | 9.334E-07 |
| 5870 | Y10B_A | F19B_W | L23B_R | T2B_A  | 1.2E-06 | 4.5E-06 | 2.365E-06 | 9.488E-07 |
| 5871 | G13B_A | D6B_A  | E18B_T | G1B_A  | 1.3E-06 | 4.3E-06 | 2.365E-06 | 9.444E-07 |
| 5872 | G13B_A | L11B_A | E18B_A | S9B_A  | 1.7E-06 | 2.8E-06 | 2.365E-06 | 2.889E-07 |
| 5873 | G13B_A | D6B_A  | V7B_A  | S9B_A  | 1.4E-06 | 3.5E-06 | 2.365E-06 | 5.842E-07 |
| 5874 | G13B_A | Y10B_A | S8B_A  | V24B_T | 1.5E-06 | 3.6E-06 | 2.365E-06 | 6.260E-07 |
| 5875 | Y10B_A | G1B_R  | V24B_T | Q14B_A | 1.6E-06 | 3.6E-06 | 2.365E-06 | 5.363E-07 |

|      |        |        |        |        |         |         |           |           |
|------|--------|--------|--------|--------|---------|---------|-----------|-----------|
| 5876 | G13B_A | Y10B_A | G1B_R  | K17B_S | 9.1E-07 | 5.9E-06 | 2.365E-06 | 9.834E-07 |
| 5877 | G13B_A | K17B_A | V24B_Q | G1B_A  | 1.8E-06 | 3.5E-06 | 2.365E-06 | 4.870E-07 |
| 5878 | G13B_A | E18B_A | F19B_A | E12B_A | 1.5E-06 | 4.0E-06 | 2.365E-06 | 5.797E-07 |
| 5879 | Y10B_A | F19B_W | K17B_S | T2B_A  | 9.8E-07 | 3.7E-06 | 2.369E-06 | 7.690E-07 |
| 5880 | G13B_A | F3B_A  | E18B_A | S9B_A  | 1.6E-06 | 3.3E-06 | 2.370E-06 | 4.318E-07 |
| 5881 | Y10B_A | V7B_A  | A16B_N | L23B_R | 7.2E-07 | 4.3E-06 | 2.370E-06 | 9.101E-07 |
| 5882 | G13B_A | S8B_A  | D6B_A  | L23B_Q | 1.5E-06 | 4.2E-06 | 2.370E-06 | 7.491E-07 |
| 5883 | Y10B_A | D6B_A  | V7B_A  | F19B_Q | 1.1E-06 | 3.9E-06 | 2.370E-06 | 9.114E-07 |
| 5884 | Y10B_A | V7B_A  | T2B_A  | V24B_N | 1.5E-06 | 3.9E-06 | 2.370E-06 | 5.805E-07 |
| 5885 | Y10B_A | S8B_A  | V7B_A  | V24B_N | 1.3E-06 | 3.9E-06 | 2.370E-06 | 6.071E-07 |
| 5886 | G13B_A | S8B_A  | L11B_A | L23B_Q | 8.4E-07 | 3.7E-06 | 2.372E-06 | 7.532E-07 |
| 5887 | G13B_A | A16B_N | K17B_A | V24B_N | 6.1E-07 | 4.3E-06 | 2.373E-06 | 9.494E-07 |
| 5888 | G13B_A | Y10B_A | F19B_Q | G1B_A  | 4.8E-07 | 4.3E-06 | 2.374E-06 | 9.661E-07 |
| 5889 | Y10B_A | G1B_R  | S5B_A  | V24B_N | 1.4E-06 | 4.0E-06 | 2.375E-06 | 6.851E-07 |
| 5890 | S8B_A  | D6B_A  | G13B_W | F19B_W | 8.1E-07 | 4.0E-06 | 2.375E-06 | 7.358E-07 |
| 5891 | Y10B_A | K17B_A | F19B_W | V24B_Q | 1.5E-06 | 5.0E-06 | 2.375E-06 | 8.632E-07 |
| 5892 | Y10B_A | F3B_A  | L11B_A | K17B_S | 1.6E-06 | 3.9E-06 | 2.375E-06 | 5.839E-07 |
| 5893 | G13B_A | S8B_A  | D6B_A  | V24B_T | 1.3E-06 | 3.6E-06 | 2.375E-06 | 5.674E-07 |
| 5894 | Y10B_A | G1B_R  | S5B_A  | V24B_Q | 1.2E-06 | 4.6E-06 | 2.375E-06 | 7.078E-07 |
| 5895 | S8B_A  | D6B_A  | V7B_A  | L23B_R | 1.6E-06 | 3.1E-06 | 2.375E-06 | 5.340E-07 |
| 5896 | G13B_A | D6B_A  | L11B_A | S9B_A  | 1.4E-06 | 3.7E-06 | 2.375E-06 | 5.609E-07 |
| 5897 | G13B_A | F3B_A  | K17B_A | V24B_Q | 1.4E-06 | 3.3E-06 | 2.375E-06 | 4.411E-07 |
| 5898 | G13B_A | D6B_A  | L11B_A | E12B_A | 1.3E-06 | 3.8E-06 | 2.380E-06 | 6.910E-07 |
| 5899 | Y10B_A | F3B_A  | L23B_R | F19B_A | 1.1E-06 | 3.3E-06 | 2.380E-06 | 4.641E-07 |
| 5900 | Y10B_A | D6B_A  | F3B_A  | L23B_R | 1.2E-06 | 4.2E-06 | 2.380E-06 | 6.662E-07 |
| 5901 | Y10B_A | S5B_A  | F19B_W | L23B_R | 1.3E-06 | 3.8E-06 | 2.380E-06 | 7.208E-07 |
| 5902 | G13B_A | G1B_R  | F19B_Q | T2B_A  | 8.1E-07 | 5.7E-06 | 2.380E-06 | 1.031E-06 |
| 5903 | G13B_A | D6B_A  | T4B_A  | V24B_N | 8.4E-07 | 4.1E-06 | 2.382E-06 | 7.896E-07 |
| 5904 | Y10B_A | F3B_A  | S5B_A  | V24B_Q | 1.0E-06 | 3.3E-06 | 2.385E-06 | 5.133E-07 |
| 5905 | G13B_A | T4B_A  | V24B_Q | T2B_A  | 1.2E-06 | 3.3E-06 | 2.385E-06 | 6.360E-07 |
| 5906 | Y10B_A | I20B_S | S5B_A  | K17B_A | 1.0E-06 | 3.5E-06 | 2.385E-06 | 5.184E-07 |
| 5907 | Y10B_A | G13B_W | E18B_T | Q14B_A | 1.6E-06 | 5.9E-06 | 2.385E-06 | 1.025E-06 |
| 5908 | Y10B_A | L23B_Q | F19B_A | Q14B_A | 1.3E-06 | 3.9E-06 | 2.385E-06 | 7.583E-07 |
| 5909 | Y10B_A | E18B_T | L11B_A | E12B_A | 1.5E-06 | 4.4E-06 | 2.385E-06 | 7.147E-07 |
| 5910 | Y10B_A | F3B_A  | A16B_N | E18B_T | 6.4E-07 | 4.5E-06 | 2.385E-06 | 1.091E-06 |
| 5911 | G13B_A | D6B_A  | L23B_R | T2B_A  | 1.6E-06 | 3.3E-06 | 2.385E-06 | 4.475E-07 |
| 5912 | Y10B_A | D6B_A  | V24B_T | G1B_A  | 1.7E-06 | 3.2E-06 | 2.385E-06 | 4.017E-07 |
| 5913 | G13B_A | D6B_A  | S9B_A  | G1B_A  | 1.8E-06 | 3.3E-06 | 2.385E-06 | 4.030E-07 |
| 5914 | G13B_A | F19B_Q | T2B_A  | G1B_A  | 8.4E-07 | 3.8E-06 | 2.387E-06 | 8.522E-07 |
| 5915 | G13B_A | A16B_N | T4B_A  | L23B_R | 6.1E-07 | 4.8E-06 | 2.389E-06 | 1.071E-06 |
| 5916 | G13B_A | D6B_A  | E18B_A | K17B_S | 1.5E-06 | 3.6E-06 | 2.390E-06 | 6.095E-07 |
| 5917 | Y10B_A | D6B_A  | F19B_W | E12B_A | 1.2E-06 | 4.9E-06 | 2.390E-06 | 9.403E-07 |
| 5918 | G13B_A | A16B_N | G1B_R  | S9B_A  | 5.1E-07 | 5.2E-06 | 2.390E-06 | 1.102E-06 |
| 5919 | G13B_A | V7B_A  | F19B_A | E12B_A | 1.5E-06 | 3.6E-06 | 2.390E-06 | 6.373E-07 |
| 5920 | Y10B_A | F3B_A  | K17B_S | G1B_A  | 1.7E-06 | 3.7E-06 | 2.395E-06 | 4.989E-07 |
| 5921 | G13B_A | S8B_A  | L11B_A | S9B_A  | 1.5E-06 | 3.5E-06 | 2.395E-06 | 4.298E-07 |
| 5922 | G13B_A | L11B_A | T4B_A  | L23B_R | 1.2E-06 | 3.3E-06 | 2.395E-06 | 6.039E-07 |
| 5923 | Y10B_A | T4B_A  | F19B_Q | K17B_S | 5.5E-07 | 9.5E-06 | 2.395E-06 | 1.825E-06 |
| 5924 | S8B_A  | D6B_A  | L11B_A | L23B_R | 1.5E-06 | 3.5E-06 | 2.400E-06 | 6.198E-07 |
| 5925 | Y10B_A | A16B_N | T4B_A  | V24B_T | 6.4E-07 | 4.8E-06 | 2.400E-06 | 1.180E-06 |
| 5926 | Y10B_A | I20B_S | K17B_A | T2B_A  | 1.4E-06 | 3.8E-06 | 2.400E-06 | 6.366E-07 |
| 5927 | G13B_A | E18B_A | T4B_A  | L23B_Q | 1.3E-06 | 3.6E-06 | 2.400E-06 | 6.617E-07 |

|      |        |        |        |        |         |         |           |           |
|------|--------|--------|--------|--------|---------|---------|-----------|-----------|
| 5928 | Y10B_A | S5B_A  | F19B_W | K17B_S | 1.2E-06 | 4.8E-06 | 2.400E-06 | 9.353E-07 |
| 5929 | G13B_A | L11B_A | K17B_S | Q14B_A | 1.3E-06 | 4.6E-06 | 2.400E-06 | 7.483E-07 |
| 5930 | Y10B_A | S8B_A  | F3B_A  | V24B_Q | 1.5E-06 | 3.9E-06 | 2.400E-06 | 5.140E-07 |
| 5931 | Y10B_A | L11B_A | S5B_A  | L23B_Q | 5.5E-07 | 4.2E-06 | 2.403E-06 | 7.925E-07 |
| 5932 | Y10B_A | V7B_A  | E18B_A | K17B_S | 1.1E-06 | 3.4E-06 | 2.405E-06 | 6.022E-07 |
| 5933 | Y10B_A | E18B_T | F19B_W | G1B_A  | 1.2E-06 | 4.0E-06 | 2.405E-06 | 9.179E-07 |
| 5934 | Y10B_A | I20B_N | K17B_A | T2B_A  | 1.4E-06 | 3.8E-06 | 2.405E-06 | 6.549E-07 |
| 5935 | G13B_A | S8B_A  | D6B_A  | F19B_Q | 1.4E-06 | 4.1E-06 | 2.405E-06 | 8.876E-07 |
| 5936 | Y10B_A | V7B_A  | F3B_A  | F19B_Q | 9.1E-07 | 4.0E-06 | 2.406E-06 | 9.003E-07 |
| 5937 | Y10B_A | A16B_N | T4B_A  | L23B_R | 5.6E-07 | 5.3E-06 | 2.408E-06 | 1.269E-06 |
| 5938 | Y10B_A | S8B_A  | G1B_R  | L23B_Q | 1.6E-06 | 3.7E-06 | 2.410E-06 | 6.664E-07 |
| 5939 | G13B_A | G1B_R  | T4B_A  | K17B_S | 1.3E-06 | 4.1E-06 | 2.410E-06 | 6.859E-07 |
| 5940 | Y10B_A | K17B_A | F19B_W | V24B_N | 1.3E-06 | 3.5E-06 | 2.410E-06 | 6.112E-07 |
| 5941 | Y10B_A | G13B_W | K17B_S | T2B_A  | 1.7E-06 | 3.4E-06 | 2.410E-06 | 4.303E-07 |
| 5942 | Y10B_A | E18B_T | T4B_A  | S9B_A  | 1.2E-06 | 3.7E-06 | 2.410E-06 | 7.772E-07 |
| 5943 | G13B_A | F3B_A  | A16B_N | E12B_A | 6.2E-07 | 3.2E-06 | 2.411E-06 | 8.253E-07 |
| 5944 | G13B_A | K17B_A | V24B_T | G1B_A  | 1.8E-06 | 4.1E-06 | 2.415E-06 | 5.556E-07 |
| 5945 | S8B_A  | D6B_A  | F3B_A  | L23B_R | 1.3E-06 | 3.4E-06 | 2.415E-06 | 5.678E-07 |
| 5946 | G13B_A | S8B_A  | E18B_A | L23B_Q | 1.3E-06 | 3.6E-06 | 2.415E-06 | 6.961E-07 |
| 5947 | Y10B_A | S5B_A  | L23B_R | G1B_A  | 1.2E-06 | 3.5E-06 | 2.415E-06 | 6.507E-07 |
| 5948 | G13B_A | F3B_A  | K17B_A | L23B_Q | 1.6E-06 | 3.9E-06 | 2.415E-06 | 6.293E-07 |
| 5949 | G13B_A | T4B_A  | K17B_S | G1B_A  | 1.7E-06 | 3.9E-06 | 2.415E-06 | 6.885E-07 |
| 5950 | Y10B_A | D6B_A  | E18B_A | V24B_T | 1.4E-06 | 3.4E-06 | 2.415E-06 | 5.102E-07 |
| 5951 | G13B_A | E18B_A | K17B_A | V24B_N | 9.4E-07 | 3.7E-06 | 2.417E-06 | 7.279E-07 |
| 5952 | Y10B_A | F3B_A  | S5B_A  | V24B_T | 1.5E-06 | 4.1E-06 | 2.420E-06 | 6.313E-07 |
| 5953 | Y10B_A | F19B_W | L23B_R | Q14B_A | 1.1E-06 | 4.2E-06 | 2.420E-06 | 8.063E-07 |
| 5954 | G13B_A | F3B_A  | F19B_A | E12B_A | 1.7E-06 | 3.4E-06 | 2.420E-06 | 4.753E-07 |
| 5955 | G13B_A | Y10B_A | E18B_T | L11B_A | 1.5E-06 | 5.0E-06 | 2.420E-06 | 8.276E-07 |
| 5956 | Y10B_A | F3B_A  | E18B_T | G1B_R  | 1.4E-06 | 3.8E-06 | 2.420E-06 | 7.083E-07 |
| 5957 | G13B_A | S5B_A  | K17B_S | G1B_A  | 1.2E-06 | 3.7E-06 | 2.425E-06 | 6.750E-07 |
| 5958 | Y10B_A | S8B_A  | E18B_T | S9B_A  | 1.6E-06 | 4.8E-06 | 2.425E-06 | 7.953E-07 |
| 5959 | G13B_A | D6B_A  | L23B_R | Q14B_A | 1.6E-06 | 3.3E-06 | 2.425E-06 | 5.260E-07 |
| 5960 | G13B_A | S8B_A  | V24B_Q | Q14B_A | 1.7E-06 | 5.6E-06 | 2.425E-06 | 8.123E-07 |
| 5961 | G13B_A | D6B_A  | F19B_W | G1B_A  | 1.0E-06 | 4.0E-06 | 2.425E-06 | 7.203E-07 |
| 5962 | Y10B_A | V7B_A  | S5B_A  | V24B_T | 1.4E-06 | 4.1E-06 | 2.425E-06 | 5.720E-07 |
| 5963 | G13B_A | G1B_R  | K17B_S | Q14B_A | 1.6E-06 | 3.8E-06 | 2.425E-06 | 5.720E-07 |
| 5964 | G13B_A | E18B_A | F19B_Q | T2B_A  | 8.3E-07 | 5.1E-06 | 2.426E-06 | 1.036E-06 |
| 5965 | Y10B_A | G13B_W | S5B_A  | S9B_A  | 1.4E-06 | 4.3E-06 | 2.430E-06 | 6.424E-07 |
| 5966 | S8B_A  | G13B_W | S9B_A  | T2B_A  | 1.5E-06 | 3.5E-06 | 2.430E-06 | 5.676E-07 |
| 5967 | Y10B_A | G1B_R  | T4B_A  | V24B_Q | 1.6E-06 | 4.4E-06 | 2.430E-06 | 7.747E-07 |
| 5968 | G13B_A | T4B_A  | V24B_Q | Q14B_A | 1.3E-06 | 3.5E-06 | 2.430E-06 | 6.967E-07 |
| 5969 | S8B_A  | G13B_W | S5B_A  | F19B_W | 1.0E-06 | 4.5E-06 | 2.430E-06 | 8.183E-07 |
| 5970 | Y10B_A | A16B_N | S5B_A  | V24B_N | 5.2E-07 | 6.2E-06 | 2.434E-06 | 1.401E-06 |
| 5971 | Y10B_A | L11B_A | Q14B_A | V24B_N | 1.5E-06 | 3.6E-06 | 2.435E-06 | 5.724E-07 |
| 5972 | Y10B_A | E18B_T | S5B_A  | S9B_A  | 1.6E-06 | 3.7E-06 | 2.435E-06 | 6.327E-07 |
| 5973 | G13B_A | S5B_A  | L23B_Q | T2B_A  | 1.5E-06 | 3.7E-06 | 2.435E-06 | 6.175E-07 |
| 5974 | Y10B_A | F3B_A  | T4B_A  | V24B_N | 1.5E-06 | 3.9E-06 | 2.435E-06 | 7.429E-07 |
| 5975 | Y10B_A | G13B_W | E18B_T | T4B_A  | 1.6E-06 | 3.5E-06 | 2.435E-06 | 5.842E-07 |
| 5976 | Y10B_A | S8B_A  | G1B_R  | V24B_N | 1.2E-06 | 4.4E-06 | 2.435E-06 | 8.683E-07 |
| 5977 | S8B_A  | D6B_A  | V7B_A  | V24B_T | 1.5E-06 | 4.3E-06 | 2.435E-06 | 7.485E-07 |
| 5978 | Y10B_A | V7B_A  | V24B_T | Q14B_A | 1.6E-06 | 3.6E-06 | 2.440E-06 | 5.256E-07 |
| 5979 | Y10B_A | E18B_A | G1B_R  | K17B_S | 1.1E-06 | 4.3E-06 | 2.440E-06 | 7.258E-07 |

|      |        |        |        |        |         |         |           |           |
|------|--------|--------|--------|--------|---------|---------|-----------|-----------|
| 5980 | Y10B_A | S8B_A  | I20B_T | K17B_A | 1.4E-06 | 3.2E-06 | 2.440E-06 | 6.286E-07 |
| 5981 | G13B_A | A16B_N | E12B_A | G1B_A  | 8.9E-07 | 3.7E-06 | 2.440E-06 | 8.681E-07 |
| 5982 | Y10B_A | D6B_A  | E18B_A | V24B_Q | 1.5E-06 | 4.2E-06 | 2.440E-06 | 6.411E-07 |
| 5983 | G13B_A | F19B_W | T4B_A  | E12B_A | 1.7E-06 | 3.5E-06 | 2.440E-06 | 5.093E-07 |
| 5984 | G13B_A | S5B_A  | F19B_A | V24B_T | 1.6E-06 | 4.5E-06 | 2.440E-06 | 8.127E-07 |
| 5985 | G13B_A | F3B_A  | E18B_T | Q14B_A | 1.6E-06 | 3.5E-06 | 2.440E-06 | 5.256E-07 |
| 5986 | Y10B_A | D6B_A  | S5B_A  | V24B_N | 1.1E-06 | 4.6E-06 | 2.440E-06 | 9.854E-07 |
| 5987 | G13B_A | V7B_A  | L11B_A | E12B_A | 1.4E-06 | 3.3E-06 | 2.440E-06 | 5.586E-07 |
| 5988 | S8B_A  | D6B_A  | L23B_R | G1B_A  | 8.9E-07 | 3.5E-06 | 2.440E-06 | 7.319E-07 |
| 5989 | Y10B_A | A16B_N | G1B_R  | S9B_A  | 7.0E-07 | 4.9E-06 | 2.443E-06 | 1.203E-06 |
| 5990 | Y10B_A | G13B_W | S9B_A  | T2B_A  | 1.4E-06 | 3.5E-06 | 2.445E-06 | 6.287E-07 |
| 5991 | G13B_A | S8B_A  | F19B_Q | G1B_A  | 1.1E-06 | 4.4E-06 | 2.445E-06 | 7.930E-07 |
| 5992 | G13B_A | G1B_R  | K17B_A | F19B_Q | 1.4E-06 | 3.6E-06 | 2.445E-06 | 7.395E-07 |
| 5993 | Y10B_A | F3B_A  | S5B_A  | V24B_N | 1.1E-06 | 3.6E-06 | 2.445E-06 | 6.386E-07 |
| 5994 | G13B_A | E18B_A | S9B_A  | G1B_A  | 1.7E-06 | 3.5E-06 | 2.445E-06 | 4.536E-07 |
| 5995 | S8B_A  | D6B_A  | A16B_N | V24B_Q | 5.2E-07 | 4.0E-06 | 2.445E-06 | 1.122E-06 |
| 5996 | S8B_A  | D6B_A  | E18B_A | L23B_R | 1.4E-06 | 3.6E-06 | 2.445E-06 | 5.336E-07 |
| 5997 | G13B_A | S8B_A  | A16B_N | V24B_Q | 3.8E-07 | 3.9E-06 | 2.447E-06 | 1.032E-06 |
| 5998 | Y10B_A | F19B_A | V24B_Q | Q14B_A | 9.8E-07 | 3.6E-06 | 2.449E-06 | 6.549E-07 |
| 5999 | S8B_A  | G13B_W | E18B_T | T4B_A  | 1.8E-06 | 3.6E-06 | 2.450E-06 | 5.145E-07 |
| 6000 | Y10B_A | D6B_A  | L11B_A | L23B_Q | 1.4E-06 | 4.7E-06 | 2.450E-06 | 7.557E-07 |
| 6001 | S8B_A  | D6B_A  | A16B_N | F19B_Q | 3.9E-07 | 5.0E-06 | 2.450E-06 | 1.171E-06 |
| 6002 | G13B_A | S8B_A  | S5B_A  | V24B_N | 1.3E-06 | 4.8E-06 | 2.450E-06 | 8.049E-07 |
| 6003 | G13B_A | S8B_A  | K17B_S | G1B_A  | 1.1E-06 | 3.9E-06 | 2.450E-06 | 7.127E-07 |
| 6004 | S8B_A  | V7B_A  | E18B_T | G1B_R  | 2.0E-06 | 2.9E-06 | 2.450E-06 | 6.364E-07 |
| 6005 | S8B_A  | D6B_A  | G1B_R  | F19B_Q | 7.8E-07 | 4.3E-06 | 2.452E-06 | 9.909E-07 |
| 6006 | Y10B_A | V7B_A  | L11B_A | L23B_R | 1.5E-06 | 3.9E-06 | 2.455E-06 | 7.409E-07 |
| 6007 | Y10B_A | K17B_A | S9B_A  | L23B_R | 1.4E-06 | 6.1E-06 | 2.455E-06 | 1.011E-06 |
| 6008 | Y10B_A | V24B_Q | T2B_A  | G1B_A  | 1.2E-06 | 4.1E-06 | 2.455E-06 | 6.794E-07 |
| 6009 | Y10B_A | E18B_T | L11B_A | G1B_A  | 1.6E-06 | 3.6E-06 | 2.455E-06 | 5.414E-07 |
| 6010 | G13B_A | S8B_A  | F19B_W | E12B_A | 1.7E-06 | 4.8E-06 | 2.455E-06 | 6.724E-07 |
| 6011 | G13B_A | F3B_A  | S5B_A  | K17B_S | 1.4E-06 | 3.3E-06 | 2.455E-06 | 5.226E-07 |
| 6012 | Y10B_A | G1B_R  | L23B_R | T2B_A  | 1.7E-06 | 3.6E-06 | 2.455E-06 | 5.799E-07 |
| 6013 | G13B_A | Y10B_A | L23B_Q | Q14B_A | 1.1E-06 | 4.4E-06 | 2.460E-06 | 7.323E-07 |
| 6014 | Y10B_A | S9B_A  | Q14B_A | E12B_A | 1.1E-06 | 3.6E-06 | 2.460E-06 | 5.924E-07 |
| 6015 | G13B_A | T4B_A  | F19B_Q | G1B_A  | 1.3E-06 | 4.7E-06 | 2.460E-06 | 1.048E-06 |
| 6016 | Y10B_A | S8B_A  | E18B_T | K17B_S | 1.3E-06 | 4.0E-06 | 2.460E-06 | 7.373E-07 |
| 6017 | Y10B_A | S8B_A  | K17B_S | E12B_A | 1.6E-06 | 4.0E-06 | 2.460E-06 | 7.408E-07 |
| 6018 | S8B_A  | D6B_A  | S5B_A  | V24B_Q | 1.7E-06 | 3.6E-06 | 2.460E-06 | 5.256E-07 |
| 6019 | G13B_A | V7B_A  | E18B_A | E12B_A | 1.9E-06 | 3.4E-06 | 2.460E-06 | 4.394E-07 |
| 6020 | G13B_A | F3B_A  | F19B_Q | T2B_A  | 8.1E-07 | 4.3E-06 | 2.461E-06 | 9.485E-07 |
| 6021 | G13B_A | A16B_N | K17B_A | L23B_R | 7.5E-07 | 5.6E-06 | 2.463E-06 | 1.216E-06 |
| 6022 | S8B_A  | G13B_W | S5B_A  | S9B_A  | 1.5E-06 | 3.6E-06 | 2.465E-06 | 5.724E-07 |
| 6023 | Y10B_A | E18B_T | K17B_A | L23B_Q | 1.0E-06 | 5.5E-06 | 2.465E-06 | 1.177E-06 |
| 6024 | G13B_A | S8B_A  | T4B_A  | V24B_N | 1.3E-06 | 3.5E-06 | 2.465E-06 | 7.250E-07 |
| 6025 | Y10B_A | K17B_A | V24B_T | E12B_A | 1.7E-06 | 4.0E-06 | 2.465E-06 | 5.344E-07 |
| 6026 | Y10B_A | S8B_A  | G13B_W | K17B_S | 1.7E-06 | 4.0E-06 | 2.470E-06 | 5.850E-07 |
| 6027 | G13B_A | E18B_A | T4B_A  | V24B_T | 2.0E-06 | 3.9E-06 | 2.470E-06 | 5.302E-07 |
| 6028 | G13B_A | A16B_N | K17B_S | T2B_A  | 1.2E-06 | 4.6E-06 | 2.470E-06 | 8.957E-07 |
| 6029 | G13B_A | Y10B_A | E18B_T | G1B_R  | 1.3E-06 | 4.7E-06 | 2.470E-06 | 9.777E-07 |
| 6030 | Y10B_A | S8B_A  | F19B_Q | E12B_A | 1.0E-06 | 4.9E-06 | 2.470E-06 | 1.170E-06 |
| 6031 | Y10B_A | E18B_T | K17B_S | T2B_A  | 9.7E-07 | 4.3E-06 | 2.474E-06 | 1.058E-06 |

|      |        |        |        |        |         |         |           |           |
|------|--------|--------|--------|--------|---------|---------|-----------|-----------|
| 6032 | Y10B_A | G13B_W | F3B_A  | G1B_R  | 1.3E-06 | 3.1E-06 | 2.475E-06 | 4.575E-07 |
| 6033 | Y10B_A | E18B_T | Q14B_A | E12B_A | 1.7E-06 | 4.7E-06 | 2.475E-06 | 7.100E-07 |
| 6034 | G13B_A | S8B_A  | T4B_A  | V24B_Q | 1.7E-06 | 3.3E-06 | 2.475E-06 | 4.908E-07 |
| 6035 | G13B_A | S5B_A  | K17B_S | F19B_A | 1.2E-06 | 3.7E-06 | 2.475E-06 | 6.866E-07 |
| 6036 | Y10B_A | L11B_A | V24B_Q | Q14B_A | 1.3E-06 | 3.5E-06 | 2.475E-06 | 5.457E-07 |
| 6037 | G13B_A | A16B_N | T4B_A  | F19B_Q | 8.2E-07 | 4.5E-06 | 2.476E-06 | 9.373E-07 |
| 6038 | Y10B_A | A16B_N | F19B_A | V24B_T | 6.2E-07 | 4.8E-06 | 2.479E-06 | 1.271E-06 |
| 6039 | Y10B_A | K17B_A | V24B_Q | E12B_A | 1.4E-06 | 4.7E-06 | 2.480E-06 | 8.907E-07 |
| 6040 | S8B_A  | G13B_W | S9B_A  | Q14B_A | 1.6E-06 | 3.6E-06 | 2.480E-06 | 6.152E-07 |
| 6041 | Y10B_A | D6B_A  | K17B_S | G1B_A  | 1.5E-06 | 4.2E-06 | 2.480E-06 | 6.955E-07 |
| 6042 | S8B_A  | G13B_W | T2B_A  | E12B_A | 1.7E-06 | 4.6E-06 | 2.480E-06 | 7.120E-07 |
| 6043 | S8B_A  | G13B_W | K17B_A | L23B_R | 1.6E-06 | 3.9E-06 | 2.480E-06 | 6.305E-07 |
| 6044 | G13B_A | Y10B_A | V7B_A  | F19B_Q | 9.2E-07 | 3.8E-06 | 2.481E-06 | 8.101E-07 |
| 6045 | G13B_A | D6B_A  | A16B_N | F19B_W | 5.7E-07 | 4.5E-06 | 2.482E-06 | 1.273E-06 |
| 6046 | S8B_A  | V7B_A  | E18B_T | L11B_A | 1.8E-06 | 3.3E-06 | 2.483E-06 | 6.014E-07 |
| 6047 | Y10B_A | D6B_A  | G1B_R  | F19B_Q | 1.1E-06 | 4.3E-06 | 2.485E-06 | 8.184E-07 |
| 6048 | G13B_A | Y10B_A | E18B_A | F19B_Q | 1.1E-06 | 4.6E-06 | 2.485E-06 | 8.653E-07 |
| 6049 | Y10B_A | I20B_S | K17B_A | Q14B_A | 1.8E-06 | 3.2E-06 | 2.485E-06 | 4.380E-07 |
| 6050 | Y10B_A | L11B_A | K17B_S | F19B_A | 1.5E-06 | 4.4E-06 | 2.485E-06 | 7.721E-07 |
| 6051 | G13B_A | D6B_A  | S9B_A  | F19B_A | 1.4E-06 | 5.1E-06 | 2.485E-06 | 8.732E-07 |
| 6052 | G13B_A | V7B_A  | T4B_A  | F19B_Q | 9.1E-07 | 5.3E-06 | 2.485E-06 | 8.806E-07 |
| 6053 | G13B_A | Y10B_A | S5B_A  | V24B_N | 1.3E-06 | 3.9E-06 | 2.485E-06 | 7.604E-07 |
| 6054 | G13B_A | L11B_A | E12B_A | G1B_A  | 1.4E-06 | 4.1E-06 | 2.485E-06 | 6.368E-07 |
| 6055 | Y10B_A | S8B_A  | F19B_A | V24B_Q | 8.4E-07 | 4.1E-06 | 2.487E-06 | 7.811E-07 |
| 6056 | Y10B_A | G1B_R  | S9B_A  | F19B_A | 1.4E-06 | 3.6E-06 | 2.490E-06 | 6.017E-07 |
| 6057 | G13B_A | D6B_A  | F3B_A  | E12B_A | 1.6E-06 | 3.6E-06 | 2.490E-06 | 4.930E-07 |
| 6058 | G13B_A | F3B_A  | S9B_A  | F19B_A | 1.5E-06 | 4.8E-06 | 2.490E-06 | 9.301E-07 |
| 6059 | G13B_A | A16B_N | E18B_T | T4B_A  | 4.8E-07 | 5.1E-06 | 2.490E-06 | 1.439E-06 |
| 6060 | Y10B_A | F3B_A  | E18B_T | L11B_A | 1.8E-06 | 3.6E-06 | 2.490E-06 | 4.633E-07 |
| 6061 | G13B_A | Y10B_A | V24B_Q | Q14B_A | 1.3E-06 | 3.9E-06 | 2.490E-06 | 7.615E-07 |
| 6062 | Y10B_A | V7B_A  | V24B_Q | T2B_A  | 1.3E-06 | 3.5E-06 | 2.490E-06 | 5.812E-07 |
| 6063 | Y10B_A | L11B_A | G1B_R  | F19B_Q | 7.6E-07 | 5.8E-06 | 2.491E-06 | 1.227E-06 |
| 6064 | Y10B_A | E18B_A | T4B_A  | V24B_N | 9.8E-07 | 3.5E-06 | 2.494E-06 | 6.287E-07 |
| 6065 | Y10B_A | F19B_A | V24B_T | T2B_A  | 1.6E-06 | 4.6E-06 | 2.495E-06 | 7.134E-07 |
| 6066 | S8B_A  | D6B_A  | F19B_Q | G1B_A  | 1.4E-06 | 4.8E-06 | 2.495E-06 | 8.678E-07 |
| 6067 | Y10B_A | D6B_A  | E18B_A | F19B_Q | 1.2E-06 | 3.7E-06 | 2.495E-06 | 8.781E-07 |
| 6068 | Y10B_A | Q14B_A | V24B_N | G1B_A  | 1.2E-06 | 3.5E-06 | 2.495E-06 | 6.345E-07 |
| 6069 | Y10B_A | V7B_A  | L23B_Q | Q14B_A | 1.6E-06 | 3.7E-06 | 2.495E-06 | 5.472E-07 |
| 6070 | G13B_A | E18B_T | K17B_A | E12B_A | 1.2E-06 | 4.9E-06 | 2.495E-06 | 9.456E-07 |
| 6071 | G13B_A | V7B_A  | E18B_A | S9B_A  | 1.5E-06 | 3.3E-06 | 2.495E-06 | 5.443E-07 |
| 6072 | S8B_A  | D6B_A  | S5B_A  | V24B_N | 1.6E-06 | 3.5E-06 | 2.495E-06 | 5.365E-07 |
| 6073 | S8B_A  | D6B_A  | A16B_N | K17B_S | 3.7E-07 | 4.6E-06 | 2.496E-06 | 1.345E-06 |
| 6074 | Y10B_A | A16B_N | L11B_A | L23B_Q | 9.4E-07 | 4.3E-06 | 2.497E-06 | 8.493E-07 |
| 6075 | G13B_A | Y10B_A | G1B_R  | F19B_Q | 8.9E-07 | 4.1E-06 | 2.499E-06 | 9.018E-07 |
| 6076 | Y10B_A | G13B_W | Q14B_A | E12B_A | 1.7E-06 | 4.4E-06 | 2.500E-06 | 6.224E-07 |
| 6077 | Y10B_A | S5B_A  | F19B_A | V24B_T | 1.5E-06 | 4.1E-06 | 2.500E-06 | 6.258E-07 |
| 6078 | G13B_A | L11B_A | T4B_A  | F19B_Q | 1.1E-06 | 3.8E-06 | 2.500E-06 | 7.511E-07 |
| 6079 | Y10B_A | S8B_A  | G1B_R  | V24B_T | 1.0E-06 | 4.4E-06 | 2.500E-06 | 7.262E-07 |
| 6080 | Y10B_A | L11B_A | G1B_R  | S9B_A  | 1.8E-06 | 3.8E-06 | 2.505E-06 | 4.850E-07 |
| 6081 | G13B_A | A16B_N | K17B_S | G1B_A  | 1.1E-06 | 4.6E-06 | 2.505E-06 | 9.316E-07 |
| 6082 | Y10B_A | S8B_A  | V7B_A  | V24B_Q | 1.6E-06 | 3.9E-06 | 2.505E-06 | 5.256E-07 |
| 6083 | S8B_A  | V7B_A  | F3B_A  | E18B_T | 1.6E-06 | 3.6E-06 | 2.505E-06 | 5.356E-07 |

|      |        |        |        |        |         |         |           |           |
|------|--------|--------|--------|--------|---------|---------|-----------|-----------|
| 6084 | G13B_A | G1B_R  | S9B_A  | Q14B_A | 1.7E-06 | 4.0E-06 | 2.505E-06 | 5.596E-07 |
| 6085 | Y10B_A | S5B_A  | V24B_Q | G1B_A  | 1.5E-06 | 3.9E-06 | 2.505E-06 | 6.629E-07 |
| 6086 | Y10B_A | F19B_A | Q14B_A | V24B_N | 1.7E-06 | 3.9E-06 | 2.505E-06 | 4.936E-07 |
| 6087 | G13B_A | V7B_A  | K17B_A | V24B_N | 1.5E-06 | 4.8E-06 | 2.505E-06 | 7.366E-07 |
| 6088 | Y10B_A | S8B_A  | L11B_A | F19B_Q | 1.3E-06 | 4.1E-06 | 2.505E-06 | 7.330E-07 |
| 6089 | S8B_A  | G13B_W | E18B_T | S5B_A  | 9.5E-07 | 5.6E-06 | 2.507E-06 | 9.163E-07 |
| 6090 | G13B_A | V7B_A  | F19B_Q | T2B_A  | 9.6E-07 | 4.7E-06 | 2.508E-06 | 1.047E-06 |
| 6091 | G13B_A | D6B_A  | K17B_A | L23B_Q | 1.7E-06 | 3.4E-06 | 2.510E-06 | 5.370E-07 |
| 6092 | Y10B_A | F19B_A | V24B_Q | T2B_A  | 1.3E-06 | 4.3E-06 | 2.510E-06 | 9.840E-07 |
| 6093 | G13B_A | F19B_W | T2B_A  | E12B_A | 1.4E-06 | 4.1E-06 | 2.510E-06 | 8.214E-07 |
| 6094 | G13B_A | F3B_A  | E18B_A | F19B_W | 1.4E-06 | 4.4E-06 | 2.510E-06 | 7.305E-07 |
| 6095 | Y10B_A | A16B_N | L23B_R | F19B_A | 6.7E-07 | 5.3E-06 | 2.513E-06 | 1.010E-06 |
| 6096 | G13B_A | T4B_A  | V24B_T | T2B_A  | 1.1E-06 | 4.1E-06 | 2.515E-06 | 6.815E-07 |
| 6097 | G13B_A | S8B_A  | G1B_R  | S9B_A  | 1.7E-06 | 3.2E-06 | 2.515E-06 | 3.977E-07 |
| 6098 | Y10B_A | E18B_T | L11B_A | G1B_R  | 1.4E-06 | 4.5E-06 | 2.515E-06 | 8.911E-07 |
| 6099 | Y10B_A | G13B_W | K17B_S | Q14B_A | 1.3E-06 | 4.0E-06 | 2.515E-06 | 8.061E-07 |
| 6100 | Y10B_A | V7B_A  | L23B_Q | T2B_A  | 1.6E-06 | 3.7E-06 | 2.515E-06 | 6.285E-07 |
| 6101 | Y10B_A | F19B_W | T4B_A  | K17B_S | 1.2E-06 | 4.1E-06 | 2.515E-06 | 7.795E-07 |
| 6102 | Y10B_A | E18B_A | F19B_W | E12B_A | 1.5E-06 | 4.1E-06 | 2.515E-06 | 7.177E-07 |
| 6103 | G13B_A | Y10B_A | S8B_A  | V24B_Q | 2.0E-06 | 3.5E-06 | 2.520E-06 | 4.819E-07 |
| 6104 | Y10B_A | L23B_Q | Q14B_A | G1B_A  | 1.2E-06 | 4.6E-06 | 2.520E-06 | 9.305E-07 |
| 6105 | G13B_A | G1B_R  | S5B_A  | K17B_S | 1.5E-06 | 4.1E-06 | 2.520E-06 | 6.771E-07 |
| 6106 | Y10B_A | T2B_A  | V24B_N | G1B_A  | 1.5E-06 | 4.5E-06 | 2.520E-06 | 8.758E-07 |
| 6107 | Y10B_A | V7B_A  | T4B_A  | V24B_Q | 1.6E-06 | 3.9E-06 | 2.520E-06 | 5.187E-07 |
| 6108 | Y10B_A | S8B_A  | F19B_A | V24B_T | 1.4E-06 | 5.3E-06 | 2.520E-06 | 8.977E-07 |
| 6109 | G13B_A | G1B_R  | T4B_A  | S9B_A  | 1.9E-06 | 3.2E-06 | 2.520E-06 | 4.238E-07 |
| 6110 | Y10B_A | A16B_N | F19B_W | E12B_A | 7.6E-07 | 3.9E-06 | 2.520E-06 | 9.507E-07 |
| 6111 | S8B_A  | G13B_W | Q14B_A | E12B_A | 1.7E-06 | 3.7E-06 | 2.525E-06 | 5.067E-07 |
| 6112 | G13B_A | D6B_A  | F19B_Q | Q14B_A | 1.1E-06 | 4.3E-06 | 2.525E-06 | 8.385E-07 |
| 6113 | G13B_A | Y10B_A | V7B_A  | E18B_T | 1.6E-06 | 3.6E-06 | 2.525E-06 | 6.180E-07 |
| 6114 | G13B_A | F3B_A  | K17B_S | Q14B_A | 1.7E-06 | 4.6E-06 | 2.525E-06 | 6.340E-07 |
| 6115 | G13B_A | F3B_A  | K17B_A | L23B_R | 1.4E-06 | 3.7E-06 | 2.525E-06 | 7.594E-07 |
| 6116 | S8B_A  | D6B_A  | A16B_N | L23B_R | 6.6E-07 | 4.6E-06 | 2.527E-06 | 1.230E-06 |
| 6117 | G13B_A | L11B_A | K17B_S | T2B_A  | 1.4E-06 | 4.1E-06 | 2.530E-06 | 8.053E-07 |
| 6118 | S8B_A  | G13B_W | E18B_T | Q14B_A | 1.7E-06 | 4.3E-06 | 2.530E-06 | 7.190E-07 |
| 6119 | Y10B_A | A16B_N | E18B_A | V24B_T | 8.1E-07 | 5.1E-06 | 2.530E-06 | 1.051E-06 |
| 6120 | Y10B_A | F19B_W | K17B_S | Q14B_A | 1.2E-06 | 4.6E-06 | 2.530E-06 | 7.781E-07 |
| 6121 | Y10B_A | G13B_W | S9B_A  | Q14B_A | 1.7E-06 | 3.9E-06 | 2.530E-06 | 5.555E-07 |
| 6122 | Y10B_A | G1B_R  | T4B_A  | V24B_T | 1.5E-06 | 4.0E-06 | 2.530E-06 | 6.697E-07 |
| 6123 | Y10B_A | G13B_W | V7B_A  | F19B_A | 1.5E-06 | 3.8E-06 | 2.530E-06 | 5.913E-07 |
| 6124 | Y10B_A | S8B_A  | A16B_N | V24B_N | 7.6E-07 | 4.3E-06 | 2.532E-06 | 9.250E-07 |
| 6125 | Y10B_A | A16B_N | L23B_R | T2B_A  | 5.6E-07 | 4.1E-06 | 2.532E-06 | 1.127E-06 |
| 6126 | Y10B_A | A16B_N | G1B_R  | E12B_A | 7.6E-07 | 5.3E-06 | 2.534E-06 | 1.295E-06 |
| 6127 | Y10B_A | F3B_A  | T4B_A  | V24B_Q | 1.5E-06 | 5.0E-06 | 2.535E-06 | 7.876E-07 |
| 6128 | G13B_A | S8B_A  | E18B_A | L23B_R | 1.1E-06 | 3.5E-06 | 2.535E-06 | 6.277E-07 |
| 6129 | S8B_A  | G13B_W | F3B_A  | G1B_A  | 1.5E-06 | 3.8E-06 | 2.535E-06 | 6.953E-07 |
| 6130 | Y10B_A | V7B_A  | V24B_Q | Q14B_A | 1.3E-06 | 5.3E-06 | 2.535E-06 | 8.406E-07 |
| 6131 | S8B_A  | G13B_W | F19B_W | Q14B_A | 1.4E-06 | 4.2E-06 | 2.535E-06 | 8.833E-07 |
| 6132 | S8B_A  | G13B_W | F3B_A  | F19B_A | 1.6E-06 | 3.6E-06 | 2.535E-06 | 5.613E-07 |
| 6133 | G13B_A | S8B_A  | A16B_N | E18B_T | 6.8E-07 | 5.6E-06 | 2.537E-06 | 1.419E-06 |
| 6134 | G13B_A | E18B_A | S5B_A  | F19B_Q | 1.4E-06 | 5.1E-06 | 2.540E-06 | 9.450E-07 |
| 6135 | Y10B_A | G1B_R  | L23B_Q | T2B_A  | 1.8E-06 | 3.5E-06 | 2.540E-06 | 5.215E-07 |

|      |        |        |        |        |         |         |           |           |
|------|--------|--------|--------|--------|---------|---------|-----------|-----------|
| 6136 | G13B_A | S5B_A  | V24B_Q | T2B_A  | 1.5E-06 | 3.9E-06 | 2.540E-06 | 5.933E-07 |
| 6137 | G13B_A | Y10B_A | S8B_A  | V24B_N | 1.7E-06 | 5.6E-06 | 2.540E-06 | 9.299E-07 |
| 6138 | Y10B_A | G1B_R  | S5B_A  | L23B_R | 1.4E-06 | 3.8E-06 | 2.540E-06 | 7.258E-07 |
| 6139 | G13B_A | A16B_N | T4B_A  | S9B_A  | 6.2E-07 | 7.0E-06 | 2.541E-06 | 1.505E-06 |
| 6140 | G13B_A | Y10B_A | T4B_A  | V24B_N | 1.3E-06 | 3.3E-06 | 2.545E-06 | 5.978E-07 |
| 6141 | Y10B_A | F3B_A  | T4B_A  | F19B_Q | 1.1E-06 | 5.0E-06 | 2.545E-06 | 1.038E-06 |
| 6142 | G13B_A | D6B_A  | E18B_A | S9B_A  | 1.3E-06 | 4.0E-06 | 2.545E-06 | 6.386E-07 |
| 6143 | Y10B_A | V7B_A  | G1B_R  | F19B_W | 1.9E-06 | 3.9E-06 | 2.545E-06 | 5.772E-07 |
| 6144 | G13B_A | A16B_N | F19B_W | G1B_A  | 6.3E-07 | 4.9E-06 | 2.546E-06 | 9.855E-07 |
| 6145 | Y10B_A | E18B_T | K17B_A | F19B_Q | 7.6E-07 | 4.6E-06 | 2.548E-06 | 1.118E-06 |
| 6146 | Y10B_A | V7B_A  | A16B_N | K17B_S | 5.2E-07 | 4.8E-06 | 2.549E-06 | 1.266E-06 |
| 6147 | Y10B_A | L11B_A | T4B_A  | V24B_Q | 1.3E-06 | 4.1E-06 | 2.550E-06 | 7.430E-07 |
| 6148 | S8B_A  | D6B_A  | F19B_W | E12B_A | 1.3E-06 | 4.2E-06 | 2.550E-06 | 8.395E-07 |
| 6149 | G13B_A | V7B_A  | S5B_A  | S9B_A  | 1.7E-06 | 3.3E-06 | 2.550E-06 | 4.347E-07 |
| 6150 | G13B_A | Q14B_A | T2B_A  | V24B_N | 1.5E-06 | 4.8E-06 | 2.550E-06 | 6.809E-07 |
| 6151 | Y10B_A | F3B_A  | V24B_T | T2B_A  | 1.3E-06 | 3.9E-06 | 2.550E-06 | 6.329E-07 |
| 6152 | G13B_A | S8B_A  | A16B_N | K17B_S | 6.1E-07 | 4.8E-06 | 2.550E-06 | 1.150E-06 |
| 6153 | S8B_A  | D6B_A  | T4B_A  | V24B_Q | 1.5E-06 | 4.2E-06 | 2.550E-06 | 6.378E-07 |
| 6154 | G13B_A | F3B_A  | E18B_A | E12B_A | 1.4E-06 | 4.4E-06 | 2.555E-06 | 8.108E-07 |
| 6155 | Y10B_A | D6B_A  | E18B_T | G1B_R  | 1.6E-06 | 4.1E-06 | 2.555E-06 | 7.423E-07 |
| 6156 | Y10B_A | V7B_A  | F3B_A  | K17B_S | 1.5E-06 | 4.5E-06 | 2.555E-06 | 7.430E-07 |
| 6157 | Y10B_A | S5B_A  | L23B_R | F19B_A | 1.9E-06 | 3.5E-06 | 2.555E-06 | 5.226E-07 |
| 6158 | G13B_A | A16B_N | L11B_A | S9B_A  | 1.5E-06 | 3.7E-06 | 2.555E-06 | 7.294E-07 |
| 6159 | Y10B_A | D6B_A  | V24B_Q | Q14B_A | 2.0E-06 | 3.5E-06 | 2.555E-06 | 3.502E-07 |
| 6160 | S8B_A  | G13B_W | F3B_A  | G1B_R  | 1.9E-06 | 3.3E-06 | 2.555E-06 | 4.148E-07 |
| 6161 | S8B_A  | G13B_W | G1B_R  | F19B_A | 1.7E-06 | 3.6E-06 | 2.560E-06 | 5.433E-07 |
| 6162 | G13B_A | G1B_R  | K17B_A | L23B_R | 1.3E-06 | 3.8E-06 | 2.560E-06 | 7.044E-07 |
| 6163 | Y10B_A | G13B_W | F19B_W | T2B_A  | 1.5E-06 | 3.8E-06 | 2.560E-06 | 5.780E-07 |
| 6164 | G13B_A | S8B_A  | L11B_A | K17B_S | 1.2E-06 | 3.7E-06 | 2.560E-06 | 6.707E-07 |
| 6165 | Y10B_A | G13B_W | F19B_W | Q14B_A | 1.8E-06 | 4.0E-06 | 2.560E-06 | 6.468E-07 |
| 6166 | S8B_A  | D6B_A  | K17B_S | F19B_A | 1.8E-06 | 3.0E-06 | 2.560E-06 | 3.470E-07 |
| 6167 | Y10B_A | F3B_A  | K17B_S | F19B_A | 1.6E-06 | 3.6E-06 | 2.560E-06 | 5.642E-07 |
| 6168 | G13B_A | E18B_T | L11B_A | T4B_A  | 1.5E-06 | 3.6E-06 | 2.560E-06 | 5.862E-07 |
| 6169 | Y10B_A | V7B_A  | Q14B_A | V24B_N | 1.1E-06 | 4.7E-06 | 2.560E-06 | 6.644E-07 |
| 6170 | Y10B_A | E18B_T | S5B_A  | F19B_W | 1.5E-06 | 5.0E-06 | 2.560E-06 | 9.196E-07 |
| 6171 | G13B_A | E18B_A | G1B_R  | E12B_A | 1.7E-06 | 4.8E-06 | 2.560E-06 | 7.207E-07 |
| 6172 | Y10B_A | A16B_N | E18B_T | G1B_A  | 8.8E-07 | 5.6E-06 | 2.564E-06 | 1.356E-06 |
| 6173 | G13B_A | D6B_A  | V7B_A  | F19B_W | 1.6E-06 | 4.7E-06 | 2.565E-06 | 8.524E-07 |
| 6174 | Y10B_A | E18B_T | S9B_A  | T2B_A  | 1.5E-06 | 3.7E-06 | 2.565E-06 | 6.612E-07 |
| 6175 | S8B_A  | D6B_A  | G13B_W | G1B_R  | 1.8E-06 | 4.0E-06 | 2.565E-06 | 5.887E-07 |
| 6176 | G13B_A | Y10B_A | A16B_N | K17B_S | 5.0E-07 | 5.1E-06 | 2.565E-06 | 1.190E-06 |
| 6177 | S8B_A  | G13B_W | V7B_A  | G1B_R  | 1.6E-06 | 4.1E-06 | 2.570E-06 | 5.371E-07 |
| 6178 | Y10B_A | G13B_W | F19B_A | G1B_A  | 1.8E-06 | 3.6E-06 | 2.570E-06 | 5.192E-07 |
| 6179 | G13B_A | D6B_A  | L11B_A | F19B_W | 1.4E-06 | 3.6E-06 | 2.570E-06 | 6.744E-07 |
| 6180 | Y10B_A | S8B_A  | F3B_A  | L23B_R | 1.8E-06 | 5.0E-06 | 2.570E-06 | 7.205E-07 |
| 6181 | G13B_A | E18B_T | G1B_R  | T4B_A  | 1.4E-06 | 5.2E-06 | 2.570E-06 | 9.471E-07 |
| 6182 | Y10B_A | I20B_N | K17B_A | Q14B_A | 1.2E-06 | 4.4E-06 | 2.570E-06 | 8.706E-07 |
| 6183 | Y10B_A | S8B_A  | L11B_A | L23B_Q | 8.0E-07 | 4.6E-06 | 2.570E-06 | 9.745E-07 |
| 6184 | Y10B_A | S5B_A  | V24B_N | G1B_A  | 1.7E-06 | 3.5E-06 | 2.570E-06 | 6.122E-07 |
| 6185 | S8B_A  | D6B_A  | T2B_A  | V24B_N | 1.4E-06 | 3.7E-06 | 2.570E-06 | 6.530E-07 |
| 6186 | S8B_A  | D6B_A  | K17B_S | G1B_A  | 1.5E-06 | 4.7E-06 | 2.570E-06 | 7.342E-07 |
| 6187 | G13B_A | E18B_T | K17B_A | S9B_A  | 9.8E-07 | 5.4E-06 | 2.574E-06 | 1.046E-06 |



|      |        |        |        |        |         |         |           |           |
|------|--------|--------|--------|--------|---------|---------|-----------|-----------|
| 6188 | G13B_A | T4B_A  | L23B_Q | T2B_A  | 1.2E-06 | 5.1E-06 | 2.575E-06 | 1.099E-06 |
| 6189 | Y10B_A | T4B_A  | L23B_Q | F19B_A | 1.0E-06 | 3.9E-06 | 2.575E-06 | 7.926E-07 |
| 6190 | Y10B_A | F19B_W | S9B_A  | Q14B_A | 1.7E-06 | 4.3E-06 | 2.575E-06 | 7.663E-07 |
| 6191 | S8B_A  | D6B_A  | T4B_A  | V24B_T | 1.7E-06 | 3.6E-06 | 2.575E-06 | 5.757E-07 |
| 6192 | Y10B_A | V24B_T | Q14B_A | G1B_A  | 1.8E-06 | 3.6E-06 | 2.575E-06 | 5.230E-07 |
| 6193 | Y10B_A | E18B_T | F19B_W | T4B_A  | 9.6E-07 | 5.9E-06 | 2.578E-06 | 1.209E-06 |
| 6194 | G13B_A | G1B_R  | T4B_A  | E12B_A | 1.8E-06 | 4.3E-06 | 2.580E-06 | 6.212E-07 |
| 6195 | Y10B_A | G13B_W | V7B_A  | G1B_R  | 1.4E-06 | 3.8E-06 | 2.580E-06 | 6.849E-07 |
| 6196 | Y10B_A | S5B_A  | K17B_S | E12B_A | 1.6E-06 | 3.8E-06 | 2.580E-06 | 6.221E-07 |
| 6197 | S8B_A  | G13B_W | E18B_T | T2B_A  | 1.6E-06 | 4.8E-06 | 2.580E-06 | 8.160E-07 |
| 6198 | Y10B_A | G1B_R  | T4B_A  | V24B_N | 1.9E-06 | 4.0E-06 | 2.580E-06 | 6.709E-07 |
| 6199 | Y10B_A | L11B_A | L23B_Q | T2B_A  | 1.4E-06 | 5.4E-06 | 2.580E-06 | 9.796E-07 |
| 6200 | G13B_A | F3B_A  | S9B_A  | Q14B_A | 2.0E-06 | 3.9E-06 | 2.580E-06 | 5.012E-07 |
| 6201 | Y10B_A | S8B_A  | A16B_N | V24B_Q | 6.1E-07 | 5.1E-06 | 2.581E-06 | 1.158E-06 |
| 6202 | Y10B_A | A16B_N | L11B_A | F19B_Q | 6.7E-07 | 5.5E-06 | 2.583E-06 | 1.113E-06 |
| 6203 | G13B_A | Y10B_A | F3B_A  | L23B_R | 1.4E-06 | 4.7E-06 | 2.585E-06 | 7.842E-07 |
| 6204 | G13B_A | Y10B_A | D6B_A  | L23B_R | 1.1E-06 | 4.3E-06 | 2.585E-06 | 8.299E-07 |
| 6205 | G13B_A | G1B_R  | K17B_A | L23B_Q | 1.7E-06 | 4.5E-06 | 2.585E-06 | 6.072E-07 |
| 6206 | G13B_A | T4B_A  | V24B_T | Q14B_A | 1.8E-06 | 3.6E-06 | 2.585E-06 | 5.304E-07 |
| 6207 | Y10B_A | L11B_A | L23B_Q | Q14B_A | 8.5E-07 | 3.5E-06 | 2.587E-06 | 6.370E-07 |
| 6208 | G13B_A | V7B_A  | S5B_A  | K17B_S | 1.3E-06 | 4.1E-06 | 2.590E-06 | 7.718E-07 |
| 6209 | G13B_A | S5B_A  | V24B_Q | Q14B_A | 1.3E-06 | 4.1E-06 | 2.590E-06 | 7.732E-07 |
| 6210 | G13B_A | S8B_A  | S5B_A  | L23B_Q | 1.3E-06 | 5.7E-06 | 2.590E-06 | 1.015E-06 |
| 6211 | G13B_A | S8B_A  | T4B_A  | L23B_Q | 1.2E-06 | 4.1E-06 | 2.590E-06 | 7.085E-07 |
| 6212 | Y10B_A | S8B_A  | E18B_T | F19B_W | 1.3E-06 | 4.1E-06 | 2.590E-06 | 8.485E-07 |
| 6213 | Y10B_A | S8B_A  | F19B_A | V24B_N | 1.5E-06 | 3.4E-06 | 2.590E-06 | 4.887E-07 |
| 6214 | G13B_A | E18B_A | K17B_S | Q14B_A | 1.6E-06 | 3.5E-06 | 2.590E-06 | 4.621E-07 |
| 6215 | G13B_A | A16B_N | S9B_A  | F19B_A | 9.4E-07 | 4.5E-06 | 2.592E-06 | 9.718E-07 |
| 6216 | S8B_A  | G13B_W | F19B_W | T4B_A  | 1.0E-06 | 4.2E-06 | 2.595E-06 | 7.790E-07 |
| 6217 | Y10B_A | F3B_A  | L23B_R | Q14B_A | 1.3E-06 | 4.8E-06 | 2.595E-06 | 7.810E-07 |
| 6218 | Y10B_A | G13B_W | K17B_A | L23B_R | 1.3E-06 | 4.6E-06 | 2.595E-06 | 8.185E-07 |
| 6219 | Y10B_A | S8B_A  | S9B_A  | E12B_A | 1.7E-06 | 3.8E-06 | 2.595E-06 | 6.476E-07 |
| 6220 | Y10B_A | A16B_N | L11B_A | S9B_A  | 5.5E-07 | 6.0E-06 | 2.597E-06 | 1.219E-06 |
| 6221 | G13B_A | A16B_N | S5B_A  | L23B_R | 4.4E-07 | 3.7E-06 | 2.597E-06 | 7.972E-07 |
| 6222 | Y10B_A | V7B_A  | E18B_T | G1B_R  | 1.4E-06 | 4.2E-06 | 2.600E-06 | 8.033E-07 |
| 6223 | G13B_A | E18B_T | T4B_A  | F19B_A | 1.3E-06 | 4.1E-06 | 2.600E-06 | 8.578E-07 |
| 6224 | G13B_A | S5B_A  | T4B_A  | V24B_T | 1.4E-06 | 4.2E-06 | 2.600E-06 | 6.537E-07 |
| 6225 | Y10B_A | F3B_A  | G1B_R  | S9B_A  | 1.4E-06 | 4.5E-06 | 2.600E-06 | 7.753E-07 |
| 6226 | Y10B_A | G13B_W | V7B_A  | G1B_A  | 1.8E-06 | 3.4E-06 | 2.600E-06 | 3.770E-07 |
| 6227 | Y10B_A | A16B_N | F19B_Q | Q14B_A | 6.9E-07 | 9.0E-06 | 2.603E-06 | 1.914E-06 |
| 6228 | G13B_A | D6B_A  | V7B_A  | E12B_A | 1.6E-06 | 4.2E-06 | 2.605E-06 | 7.536E-07 |
| 6229 | G13B_A | Y10B_A | T4B_A  | V24B_T | 1.6E-06 | 4.5E-06 | 2.605E-06 | 6.533E-07 |
| 6230 | Y10B_A | L11B_A | L23B_R | Q14B_A | 1.5E-06 | 3.5E-06 | 2.605E-06 | 6.755E-07 |
| 6231 | Y10B_A | E18B_T | F19B_A | G1B_A  | 1.6E-06 | 4.3E-06 | 2.605E-06 | 7.870E-07 |
| 6232 | S8B_A  | D6B_A  | L23B_Q | Q14B_A | 1.4E-06 | 4.0E-06 | 2.605E-06 | 7.790E-07 |
| 6233 | Y10B_A | T4B_A  | L23B_R | G1B_A  | 1.6E-06 | 4.3E-06 | 2.605E-06 | 7.626E-07 |
| 6234 | G13B_A | E18B_A | K17B_A | L23B_R | 1.1E-06 | 4.5E-06 | 2.605E-06 | 8.313E-07 |
| 6235 | Y10B_A | D6B_A  | S5B_A  | V24B_Q | 1.6E-06 | 3.5E-06 | 2.605E-06 | 4.740E-07 |
| 6236 | Y10B_A | D6B_A  | T4B_A  | V24B_Q | 1.5E-06 | 4.4E-06 | 2.605E-06 | 8.003E-07 |
| 6237 | S8B_A  | D6B_A  | L11B_A | F19B_Q | 1.3E-06 | 4.6E-06 | 2.610E-06 | 8.078E-07 |
| 6238 | S8B_A  | G13B_W | L11B_A | G1B_R  | 1.6E-06 | 5.1E-06 | 2.610E-06 | 7.867E-07 |
| 6239 | G13B_A | K17B_S | T2B_A  | G1B_A  | 1.3E-06 | 3.9E-06 | 2.610E-06 | 7.033E-07 |

|      |        |        |        |        |         |         |           |           |
|------|--------|--------|--------|--------|---------|---------|-----------|-----------|
| 6240 | Y10B_A | V24B_T | T2B_A  | G1B_A  | 1.7E-06 | 3.5E-06 | 2.610E-06 | 5.379E-07 |
| 6241 | Y10B_A | L11B_A | L23B_R | T2B_A  | 1.4E-06 | 3.5E-06 | 2.610E-06 | 5.803E-07 |
| 6242 | Y10B_A | E18B_T | S5B_A  | E12B_A | 1.3E-06 | 4.0E-06 | 2.610E-06 | 8.831E-07 |
| 6243 | Y10B_A | E18B_A | F19B_Q | G1B_A  | 1.1E-06 | 4.3E-06 | 2.610E-06 | 9.066E-07 |
| 6244 | Y10B_A | S8B_A  | E18B_A | V24B_Q | 1.4E-06 | 3.9E-06 | 2.610E-06 | 6.138E-07 |
| 6245 | Y10B_A | K17B_A | F19B_Q | S9B_A  | 1.0E-06 | 4.3E-06 | 2.610E-06 | 7.960E-07 |
| 6246 | Y10B_A | A16B_N | L23B_Q | T2B_A  | 6.9E-07 | 5.6E-06 | 2.610E-06 | 1.299E-06 |
| 6247 | G13B_A | E18B_T | S5B_A  | G1B_A  | 2.1E-06 | 4.3E-06 | 2.615E-06 | 6.588E-07 |
| 6248 | Y10B_A | A16B_N | E18B_A | F19B_Q | 1.3E-06 | 4.3E-06 | 2.615E-06 | 1.097E-06 |
| 6249 | G13B_A | F3B_A  | T4B_A  | S9B_A  | 2.0E-06 | 3.9E-06 | 2.615E-06 | 5.304E-07 |
| 6250 | G13B_A | S8B_A  | E18B_T | G1B_R  | 1.2E-06 | 3.8E-06 | 2.615E-06 | 8.375E-07 |
| 6251 | Y10B_A | L11B_A | G1B_R  | F19B_W | 1.6E-06 | 5.1E-06 | 2.615E-06 | 8.512E-07 |
| 6252 | G13B_A | D6B_A  | G1B_R  | F19B_W | 1.1E-06 | 4.7E-06 | 2.615E-06 | 8.139E-07 |
| 6253 | Y10B_A | A16B_N | T4B_A  | V24B_N | 6.0E-07 | 5.1E-06 | 2.618E-06 | 1.264E-06 |
| 6254 | Y10B_A | S8B_A  | V24B_T | G1B_A  | 1.5E-06 | 5.0E-06 | 2.620E-06 | 7.530E-07 |
| 6255 | Y10B_A | K17B_S | F19B_A | G1B_A  | 1.6E-06 | 4.2E-06 | 2.620E-06 | 7.865E-07 |
| 6256 | Y10B_A | D6B_A  | F19B_Q | G1B_A  | 1.4E-06 | 5.4E-06 | 2.620E-06 | 9.578E-07 |
| 6257 | S8B_A  | D6B_A  | V24B_Q | Q14B_A | 1.4E-06 | 3.5E-06 | 2.620E-06 | 5.662E-07 |
| 6258 | G13B_A | V24B_Q | Q14B_A | T2B_A  | 1.3E-06 | 4.8E-06 | 2.620E-06 | 7.641E-07 |
| 6259 | G13B_A | E18B_T | G1B_R  | S5B_A  | 1.4E-06 | 4.0E-06 | 2.620E-06 | 7.324E-07 |
| 6260 | Y10B_A | G1B_R  | S5B_A  | L23B_Q | 1.3E-06 | 5.6E-06 | 2.620E-06 | 1.005E-06 |
| 6261 | G13B_A | D6B_A  | K17B_S | Q14B_A | 1.7E-06 | 3.5E-06 | 2.625E-06 | 5.067E-07 |
| 6262 | Y10B_A | G13B_W | T2B_A  | E12B_A | 1.8E-06 | 5.4E-06 | 2.625E-06 | 8.039E-07 |
| 6263 | G13B_A | K17B_A | S9B_A  | E12B_A | 1.5E-06 | 3.8E-06 | 2.625E-06 | 6.043E-07 |
| 6264 | G13B_A | D6B_A  | F19B_Q | T2B_A  | 1.2E-06 | 5.4E-06 | 2.625E-06 | 1.031E-06 |
| 6265 | G13B_A | F3B_A  | T4B_A  | K17B_S | 1.5E-06 | 5.6E-06 | 2.625E-06 | 9.695E-07 |
| 6266 | Y10B_A | L11B_A | T4B_A  | L23B_Q | 1.6E-06 | 3.9E-06 | 2.625E-06 | 6.357E-07 |
| 6267 | G13B_A | D6B_A  | K17B_A | V24B_N | 1.6E-06 | 4.2E-06 | 2.630E-06 | 8.066E-07 |
| 6268 | Y10B_A | G13B_W | F19B_W | T4B_A  | 1.2E-06 | 4.0E-06 | 2.630E-06 | 8.904E-07 |
| 6269 | Y10B_A | F19B_W | T4B_A  | S9B_A  | 1.5E-06 | 3.9E-06 | 2.630E-06 | 6.250E-07 |
| 6270 | Y10B_A | F19B_A | V24B_T | Q14B_A | 1.6E-06 | 4.4E-06 | 2.635E-06 | 6.426E-07 |
| 6271 | G13B_A | T4B_A  | L23B_R | T2B_A  | 1.6E-06 | 4.3E-06 | 2.635E-06 | 6.564E-07 |
| 6272 | G13B_A | E18B_A | K17B_A | L23B_Q | 1.0E-06 | 3.8E-06 | 2.635E-06 | 7.307E-07 |
| 6273 | Y10B_A | V7B_A  | S5B_A  | V24B_Q | 1.3E-06 | 4.6E-06 | 2.635E-06 | 9.292E-07 |
| 6274 | G13B_A | F3B_A  | K17B_A | V24B_T | 1.7E-06 | 4.2E-06 | 2.635E-06 | 7.177E-07 |
| 6275 | G13B_A | D6B_A  | E18B_A | E12B_A | 1.7E-06 | 4.0E-06 | 2.635E-06 | 5.860E-07 |
| 6276 | Y10B_A | G13B_W | A16B_N | E18B_A | 9.3E-07 | 4.7E-06 | 2.637E-06 | 1.207E-06 |
| 6277 | G13B_A | S8B_A  | E18B_A | K17B_S | 1.6E-06 | 4.2E-06 | 2.640E-06 | 6.261E-07 |
| 6278 | Y10B_A | F3B_A  | T2B_A  | V24B_N | 1.5E-06 | 3.7E-06 | 2.640E-06 | 6.047E-07 |
| 6279 | G13B_A | S8B_A  | L23B_Q | Q14B_A | 1.9E-06 | 3.7E-06 | 2.640E-06 | 5.670E-07 |
| 6280 | Y10B_A | S8B_A  | G13B_W | E12B_A | 1.4E-06 | 3.7E-06 | 2.640E-06 | 5.826E-07 |
| 6281 | Y10B_A | F3B_A  | S5B_A  | L23B_Q | 1.3E-06 | 4.2E-06 | 2.640E-06 | 7.207E-07 |
| 6282 | G13B_A | Y10B_A | L11B_A | K17B_S | 1.6E-06 | 3.9E-06 | 2.640E-06 | 7.126E-07 |
| 6283 | Y10B_A | G13B_W | E18B_A | G1B_R  | 1.6E-06 | 4.7E-06 | 2.640E-06 | 6.754E-07 |
| 6284 | Y10B_A | E18B_A | V24B_Q | Q14B_A | 1.6E-06 | 6.0E-06 | 2.640E-06 | 9.144E-07 |
| 6285 | S8B_A  | D6B_A  | F3B_A  | S9B_A  | 2.0E-06 | 3.7E-06 | 2.640E-06 | 5.335E-07 |
| 6286 | G13B_A | V7B_A  | S5B_A  | F19B_Q | 1.1E-06 | 4.7E-06 | 2.645E-06 | 1.009E-06 |
| 6287 | G13B_A | K17B_A | F19B_W | S9B_A  | 1.6E-06 | 4.2E-06 | 2.645E-06 | 7.681E-07 |
| 6288 | Y10B_A | L23B_R | F19B_A | T2B_A  | 1.6E-06 | 3.9E-06 | 2.645E-06 | 5.898E-07 |
| 6289 | G13B_A | S5B_A  | T4B_A  | V24B_N | 1.5E-06 | 4.8E-06 | 2.645E-06 | 8.624E-07 |
| 6290 | Y10B_A | S8B_A  | A16B_N | L23B_R | 6.9E-07 | 4.5E-06 | 2.649E-06 | 1.189E-06 |
| 6291 | G13B_A | V7B_A  | S9B_A  | Q14B_A | 1.8E-06 | 4.1E-06 | 2.650E-06 | 5.790E-07 |

|      |        |        |        |        |         |         |           |           |
|------|--------|--------|--------|--------|---------|---------|-----------|-----------|
| 6292 | Y10B_A | L11B_A | E18B_A | F19B_Q | 1.4E-06 | 5.9E-06 | 2.650E-06 | 1.237E-06 |
| 6293 | G13B_A | S8B_A  | S5B_A  | L23B_R | 1.6E-06 | 5.3E-06 | 2.650E-06 | 8.426E-07 |
| 6294 | Y10B_A | S5B_A  | L23B_Q | G1B_A  | 1.6E-06 | 4.9E-06 | 2.650E-06 | 8.745E-07 |
| 6295 | Y10B_A | F3B_A  | L23B_Q | T2B_A  | 1.1E-06 | 6.3E-06 | 2.650E-06 | 1.284E-06 |
| 6296 | G13B_A | E18B_A | K17B_A | V24B_Q | 1.3E-06 | 4.2E-06 | 2.650E-06 | 7.871E-07 |
| 6297 | S8B_A  | V7B_A  | A16B_N | E12B_A | 6.9E-07 | 4.9E-06 | 2.653E-06 | 1.149E-06 |
| 6298 | G13B_A | A16B_N | S5B_A  | S9B_A  | 7.6E-07 | 4.3E-06 | 2.653E-06 | 9.084E-07 |
| 6299 | G13B_A | Y10B_A | G1B_R  | S9B_A  | 2.0E-06 | 3.8E-06 | 2.655E-06 | 5.246E-07 |
| 6300 | G13B_A | Y10B_A | V7B_A  | K17B_S | 1.6E-06 | 3.9E-06 | 2.655E-06 | 7.104E-07 |
| 6301 | Y10B_A | D6B_A  | L11B_A | F19B_Q | 1.2E-06 | 6.4E-06 | 2.655E-06 | 1.293E-06 |
| 6302 | Y10B_A | V7B_A  | T4B_A  | V24B_T | 1.8E-06 | 3.3E-06 | 2.655E-06 | 4.605E-07 |
| 6303 | Y10B_A | F19B_W | S9B_A  | T2B_A  | 1.5E-06 | 3.7E-06 | 2.655E-06 | 6.669E-07 |
| 6304 | S8B_A  | V7B_A  | A16B_N | E18B_T | 4.5E-07 | 5.6E-06 | 2.659E-06 | 1.265E-06 |
| 6305 | Y10B_A | A16B_N | S5B_A  | V24B_T | 8.8E-07 | 4.8E-06 | 2.659E-06 | 1.102E-06 |
| 6306 | G13B_A | E18B_T | G1B_R  | T2B_A  | 1.7E-06 | 4.5E-06 | 2.660E-06 | 8.146E-07 |
| 6307 | Y10B_A | L11B_A | T4B_A  | V24B_N | 1.7E-06 | 5.6E-06 | 2.660E-06 | 9.870E-07 |
| 6308 | G13B_A | S5B_A  | V24B_T | T2B_A  | 1.6E-06 | 4.1E-06 | 2.660E-06 | 6.581E-07 |
| 6309 | G13B_A | V7B_A  | K17B_A | V24B_T | 1.8E-06 | 4.2E-06 | 2.660E-06 | 6.369E-07 |
| 6310 | G13B_A | Y10B_A | S9B_A  | F19B_A | 1.7E-06 | 3.5E-06 | 2.660E-06 | 4.650E-07 |
| 6311 | G13B_A | F3B_A  | K17B_S | T2B_A  | 1.6E-06 | 4.7E-06 | 2.660E-06 | 7.022E-07 |
| 6312 | G13B_A | F19B_Q | Q14B_A | G1B_A  | 1.3E-06 | 4.0E-06 | 2.660E-06 | 8.068E-07 |
| 6313 | G13B_A | S8B_A  | E18B_T | L11B_A | 1.6E-06 | 4.8E-06 | 2.660E-06 | 1.022E-06 |
| 6314 | Y10B_A | A16B_N | L23B_R | Q14B_A | 5.6E-07 | 3.9E-06 | 2.663E-06 | 8.011E-07 |
| 6315 | Y10B_A | D6B_A  | E18B_T | L11B_A | 1.4E-06 | 3.9E-06 | 2.665E-06 | 7.250E-07 |
| 6316 | S8B_A  | G13B_W | A16B_N | G1B_A  | 7.1E-07 | 5.4E-06 | 2.665E-06 | 1.181E-06 |
| 6317 | G13B_A | G1B_R  | S5B_A  | S9B_A  | 1.4E-06 | 4.0E-06 | 2.665E-06 | 6.983E-07 |
| 6318 | Y10B_A | G1B_R  | F19B_Q | Q14B_A | 1.1E-06 | 5.4E-06 | 2.665E-06 | 1.202E-06 |
| 6319 | G13B_A | V7B_A  | K17B_S | Q14B_A | 1.4E-06 | 4.7E-06 | 2.665E-06 | 9.642E-07 |
| 6320 | Y10B_A | K17B_A | L23B_Q | E12B_A | 1.8E-06 | 4.1E-06 | 2.665E-06 | 5.806E-07 |
| 6321 | Y10B_A | E18B_A | K17B_S | G1B_A  | 1.6E-06 | 3.5E-06 | 2.665E-06 | 5.383E-07 |
| 6322 | Y10B_A | D6B_A  | L23B_R | F19B_A | 1.6E-06 | 3.7E-06 | 2.665E-06 | 6.839E-07 |
| 6323 | Y10B_A | V7B_A  | S5B_A  | V24B_N | 1.7E-06 | 4.8E-06 | 2.665E-06 | 7.110E-07 |
| 6324 | Y10B_A | S8B_A  | D6B_A  | V24B_T | 1.9E-06 | 3.5E-06 | 2.665E-06 | 4.870E-07 |
| 6325 | Y10B_A | S8B_A  | G13B_W | F19B_W | 1.4E-06 | 4.2E-06 | 2.670E-06 | 8.548E-07 |
| 6326 | G13B_A | F19B_W | T2B_A  | G1B_A  | 1.2E-06 | 3.6E-06 | 2.670E-06 | 6.392E-07 |
| 6327 | Y10B_A | T4B_A  | S9B_A  | E12B_A | 1.5E-06 | 3.8E-06 | 2.670E-06 | 7.049E-07 |
| 6328 | G13B_A | Y10B_A | V24B_T | Q14B_A | 1.7E-06 | 3.3E-06 | 2.670E-06 | 4.835E-07 |
| 6329 | G13B_A | S8B_A  | D6B_A  | E18B_T | 1.4E-06 | 4.6E-06 | 2.670E-06 | 8.317E-07 |
| 6330 | Y10B_A | V7B_A  | L11B_A | S9B_A  | 1.8E-06 | 3.5E-06 | 2.670E-06 | 4.879E-07 |
| 6331 | Y10B_A | V7B_A  | E18B_T | L11B_A | 1.8E-06 | 3.6E-06 | 2.670E-06 | 5.151E-07 |
| 6332 | G13B_A | V7B_A  | E18B_T | T2B_A  | 1.8E-06 | 4.1E-06 | 2.670E-06 | 6.899E-07 |
| 6333 | G13B_A | Y10B_A | Q14B_A | V24B_N | 1.5E-06 | 4.8E-06 | 2.670E-06 | 9.900E-07 |
| 6334 | G13B_A | Y10B_A | K17B_S | G1B_A  | 1.7E-06 | 4.7E-06 | 2.670E-06 | 7.589E-07 |
| 6335 | G13B_A | A16B_N | E18B_T | Q14B_A | 5.2E-07 | 5.3E-06 | 2.674E-06 | 1.410E-06 |
| 6336 | Y10B_A | S8B_A  | L11B_A | V24B_T | 1.5E-06 | 4.5E-06 | 2.675E-06 | 8.025E-07 |
| 6337 | Y10B_A | L11B_A | T4B_A  | V24B_T | 1.7E-06 | 4.8E-06 | 2.675E-06 | 8.207E-07 |
| 6338 | S8B_A  | G13B_W | F19B_A | G1B_A  | 1.6E-06 | 5.5E-06 | 2.675E-06 | 9.514E-07 |
| 6339 | Y10B_A | D6B_A  | K17B_S | F19B_A | 1.4E-06 | 4.7E-06 | 2.675E-06 | 8.303E-07 |
| 6340 | G13B_A | Y10B_A | V7B_A  | S9B_A  | 1.3E-06 | 3.8E-06 | 2.675E-06 | 6.348E-07 |
| 6341 | G13B_A | S8B_A  | V24B_Q | T2B_A  | 1.1E-06 | 4.1E-06 | 2.675E-06 | 7.055E-07 |
| 6342 | Y10B_A | A16B_N | E18B_T | G1B_R  | 9.7E-07 | 4.7E-06 | 2.678E-06 | 1.104E-06 |
| 6343 | Y10B_A | T4B_A  | V24B_Q | G1B_A  | 1.7E-06 | 3.9E-06 | 2.680E-06 | 4.764E-07 |

|      |        |        |        |        |         |         |           |           |
|------|--------|--------|--------|--------|---------|---------|-----------|-----------|
| 6344 | G13B_A | K17B_A | L23B_R | G1B_A  | 1.6E-06 | 5.1E-06 | 2.680E-06 | 9.288E-07 |
| 6345 | Y10B_A | S8B_A  | L23B_R | F19B_A | 1.2E-06 | 4.3E-06 | 2.680E-06 | 8.231E-07 |
| 6346 | G13B_A | G1B_R  | K17B_S | T2B_A  | 1.3E-06 | 4.4E-06 | 2.680E-06 | 8.859E-07 |
| 6347 | Y10B_A | K17B_A | F19B_W | L23B_Q | 1.4E-06 | 6.0E-06 | 2.680E-06 | 1.036E-06 |
| 6348 | Y10B_A | S8B_A  | V7B_A  | F19B_Q | 1.5E-06 | 4.2E-06 | 2.680E-06 | 8.829E-07 |
| 6349 | G13B_A | K17B_S | Q14B_A | G1B_A  | 1.9E-06 | 3.9E-06 | 2.680E-06 | 5.126E-07 |
| 6350 | Y10B_A | L11B_A | V24B_T | T2B_A  | 1.7E-06 | 3.9E-06 | 2.680E-06 | 6.963E-07 |
| 6351 | G13B_A | G1B_R  | F19B_W | T4B_A  | 1.6E-06 | 3.9E-06 | 2.685E-06 | 6.706E-07 |
| 6352 | S8B_A  | D6B_A  | F3B_A  | F19B_Q | 1.1E-06 | 4.8E-06 | 2.685E-06 | 8.610E-07 |
| 6353 | Y10B_A | S5B_A  | F19B_W | S9B_A  | 1.3E-06 | 3.6E-06 | 2.685E-06 | 6.945E-07 |
| 6354 | Y10B_A | S8B_A  | V7B_A  | V24B_T | 1.3E-06 | 4.1E-06 | 2.685E-06 | 7.604E-07 |
| 6355 | G13B_A | S5B_A  | S9B_A  | F19B_A | 1.5E-06 | 4.6E-06 | 2.685E-06 | 7.962E-07 |
| 6356 | Y10B_A | E18B_T | S9B_A  | Q14B_A | 1.6E-06 | 4.4E-06 | 2.685E-06 | 8.816E-07 |
| 6357 | Y10B_A | A16B_N | L11B_A | F19B_W | 7.7E-07 | 6.3E-06 | 2.686E-06 | 1.426E-06 |
| 6358 | G13B_A | Y10B_A | L23B_Q | T2B_A  | 8.5E-07 | 5.1E-06 | 2.688E-06 | 1.062E-06 |
| 6359 | Y10B_A | K17B_A | F19B_W | L23B_R | 1.5E-06 | 4.1E-06 | 2.690E-06 | 7.960E-07 |
| 6360 | G13B_A | E18B_T | S5B_A  | F19B_A | 1.1E-06 | 4.1E-06 | 2.690E-06 | 6.382E-07 |
| 6361 | G13B_A | K17B_A | F19B_W | E12B_A | 1.6E-06 | 5.1E-06 | 2.690E-06 | 9.130E-07 |
| 6362 | G13B_A | T4B_A  | T2B_A  | V24B_N | 1.1E-06 | 4.1E-06 | 2.690E-06 | 8.045E-07 |
| 6363 | Y10B_A | S8B_A  | L11B_A | V24B_N | 1.5E-06 | 5.6E-06 | 2.690E-06 | 1.071E-06 |
| 6364 | Y10B_A | E18B_T | T2B_A  | E12B_A | 1.7E-06 | 4.7E-06 | 2.690E-06 | 8.246E-07 |
| 6365 | G13B_A | E18B_A | F19B_Q | Q14B_A | 9.8E-07 | 4.1E-06 | 2.694E-06 | 8.353E-07 |
| 6366 | Y10B_A | A16B_N | G1B_R  | F19B_W | 4.9E-07 | 7.8E-06 | 2.694E-06 | 1.730E-06 |
| 6367 | Y10B_A | F3B_A  | V24B_Q | T2B_A  | 1.8E-06 | 4.2E-06 | 2.695E-06 | 6.253E-07 |
| 6368 | G13B_A | L11B_A | T4B_A  | K17B_S | 1.1E-06 | 4.7E-06 | 2.695E-06 | 8.678E-07 |
| 6369 | G13B_A | Y10B_A | T2B_A  | V24B_N | 1.6E-06 | 4.8E-06 | 2.695E-06 | 7.473E-07 |
| 6370 | G13B_A | L11B_A | T4B_A  | S9B_A  | 1.7E-06 | 3.7E-06 | 2.695E-06 | 4.236E-07 |
| 6371 | Y10B_A | S8B_A  | F3B_A  | V24B_T | 1.5E-06 | 4.1E-06 | 2.695E-06 | 6.337E-07 |
| 6372 | Y10B_A | E18B_A | K17B_S | F19B_A | 1.5E-06 | 4.7E-06 | 2.695E-06 | 7.236E-07 |
| 6373 | Y10B_A | E18B_T | T4B_A  | E12B_A | 1.7E-06 | 4.9E-06 | 2.695E-06 | 8.781E-07 |
| 6374 | G13B_A | V7B_A  | K17B_A | L23B_Q | 1.6E-06 | 3.7E-06 | 2.695E-06 | 6.755E-07 |
| 6375 | G13B_A | S5B_A  | S9B_A  | G1B_A  | 1.6E-06 | 3.5E-06 | 2.695E-06 | 4.796E-07 |
| 6376 | G13B_A | V7B_A  | E18B_T | S5B_A  | 1.8E-06 | 4.3E-06 | 2.695E-06 | 7.265E-07 |
| 6377 | Y10B_A | E18B_T | F19B_W | T2B_A  | 1.1E-06 | 4.5E-06 | 2.695E-06 | 9.197E-07 |
| 6378 | Y10B_A | F3B_A  | E18B_A | F19B_Q | 1.4E-06 | 5.3E-06 | 2.700E-06 | 9.878E-07 |
| 6379 | G13B_A | S9B_A  | F19B_A | Q14B_A | 1.8E-06 | 4.3E-06 | 2.700E-06 | 6.813E-07 |
| 6380 | G13B_A | L11B_A | F19B_A | E12B_A | 1.7E-06 | 4.6E-06 | 2.700E-06 | 7.175E-07 |
| 6381 | G13B_A | S8B_A  | S5B_A  | F19B_Q | 1.5E-06 | 5.6E-06 | 2.700E-06 | 9.931E-07 |
| 6382 | G13B_A | Y10B_A | E18B_T | G1B_A  | 1.5E-06 | 3.6E-06 | 2.700E-06 | 5.938E-07 |
| 6383 | Y10B_A | V7B_A  | S9B_A  | F19B_A | 1.6E-06 | 4.4E-06 | 2.700E-06 | 7.255E-07 |
| 6384 | Y10B_A | F3B_A  | L23B_Q | Q14B_A | 1.6E-06 | 4.6E-06 | 2.700E-06 | 7.773E-07 |
| 6385 | Y10B_A | F3B_A  | T4B_A  | L23B_Q | 9.9E-07 | 4.6E-06 | 2.704E-06 | 8.449E-07 |
| 6386 | G13B_A | L23B_Q | Q14B_A | T2B_A  | 1.2E-06 | 4.4E-06 | 2.705E-06 | 8.023E-07 |
| 6387 | G13B_A | S8B_A  | F3B_A  | E18B_T | 1.5E-06 | 4.3E-06 | 2.705E-06 | 7.930E-07 |
| 6388 | S8B_A  | D6B_A  | F3B_A  | K17B_S | 1.5E-06 | 4.3E-06 | 2.705E-06 | 7.776E-07 |
| 6389 | S8B_A  | D6B_A  | T4B_A  | V24B_N | 1.6E-06 | 4.4E-06 | 2.705E-06 | 8.056E-07 |
| 6390 | Y10B_A | T4B_A  | L23B_Q | G1B_A  | 1.9E-06 | 3.7E-06 | 2.705E-06 | 6.755E-07 |
| 6391 | Y10B_A | T4B_A  | F19B_Q | G1B_A  | 1.1E-06 | 5.6E-06 | 2.705E-06 | 1.284E-06 |
| 6392 | Y10B_A | S8B_A  | L23B_Q | F19B_A | 9.8E-07 | 4.8E-06 | 2.709E-06 | 1.034E-06 |
| 6393 | Y10B_A | V7B_A  | L11B_A | K17B_S | 1.7E-06 | 4.1E-06 | 2.710E-06 | 7.218E-07 |
| 6394 | Y10B_A | E18B_A | L23B_R | F19B_A | 1.6E-06 | 3.9E-06 | 2.710E-06 | 4.844E-07 |
| 6395 | Y10B_A | S8B_A  | F19B_W | S9B_A  | 1.4E-06 | 4.3E-06 | 2.710E-06 | 7.966E-07 |

|      |        |        |        |        |         |         |           |           |
|------|--------|--------|--------|--------|---------|---------|-----------|-----------|
| 6396 | S8B_A  | G13B_W | L11B_A | E18B_A | 1.6E-06 | 4.3E-06 | 2.710E-06 | 6.905E-07 |
| 6397 | G13B_A | E18B_T | K17B_A | F19B_W | 1.5E-06 | 6.0E-06 | 2.710E-06 | 1.335E-06 |
| 6398 | S8B_A  | G13B_W | L11B_A | F19B_A | 1.6E-06 | 4.3E-06 | 2.715E-06 | 7.485E-07 |
| 6399 | G13B_A | S8B_A  | T4B_A  | V24B_T | 1.3E-06 | 3.6E-06 | 2.715E-06 | 6.923E-07 |
| 6400 | Y10B_A | G1B_R  | L23B_R | Q14B_A | 1.7E-06 | 4.2E-06 | 2.715E-06 | 6.800E-07 |
| 6401 | Y10B_A | A16B_N | S5B_A  | V24B_Q | 1.0E-06 | 3.8E-06 | 2.715E-06 | 8.222E-07 |
| 6402 | G13B_A | F3B_A  | E18B_T | T4B_A  | 1.8E-06 | 4.3E-06 | 2.720E-06 | 6.810E-07 |
| 6403 | Y10B_A | D6B_A  | L23B_R | Q14B_A | 1.2E-06 | 4.0E-06 | 2.720E-06 | 7.811E-07 |
| 6404 | G13B_A | S8B_A  | S5B_A  | V24B_Q | 1.2E-06 | 5.6E-06 | 2.720E-06 | 1.004E-06 |
| 6405 | Y10B_A | V7B_A  | E18B_A | F19B_Q | 1.2E-06 | 5.4E-06 | 2.720E-06 | 1.081E-06 |
| 6406 | G13B_A | V7B_A  | T4B_A  | S9B_A  | 1.7E-06 | 4.0E-06 | 2.720E-06 | 5.278E-07 |
| 6407 | G13B_A | E18B_A | K17B_A | V24B_T | 1.6E-06 | 5.4E-06 | 2.720E-06 | 8.514E-07 |
| 6408 | G13B_A | D6B_A  | K17B_S | T2B_A  | 1.5E-06 | 4.9E-06 | 2.720E-06 | 8.691E-07 |
| 6409 | S8B_A  | D6B_A  | V7B_A  | F19B_Q | 9.1E-07 | 4.4E-06 | 2.720E-06 | 9.480E-07 |
| 6410 | G13B_A | Y10B_A | D6B_A  | K17B_S | 1.5E-06 | 3.5E-06 | 2.720E-06 | 5.872E-07 |
| 6411 | G13B_A | Y10B_A | S5B_A  | V24B_T | 1.3E-06 | 4.1E-06 | 2.725E-06 | 6.480E-07 |
| 6412 | Y10B_A | E18B_A | S5B_A  | V24B_Q | 1.5E-06 | 4.8E-06 | 2.725E-06 | 7.552E-07 |
| 6413 | Y10B_A | V7B_A  | G1B_R  | E12B_A | 2.0E-06 | 4.6E-06 | 2.725E-06 | 7.100E-07 |
| 6414 | Y10B_A | L23B_Q | T2B_A  | G1B_A  | 1.6E-06 | 4.2E-06 | 2.725E-06 | 7.759E-07 |
| 6415 | Y10B_A | A16B_N | Q14B_A | V24B_N | 6.4E-07 | 6.2E-06 | 2.729E-06 | 1.192E-06 |
| 6416 | G13B_A | A16B_N | K17B_A | V24B_T | 1.2E-06 | 3.9E-06 | 2.730E-06 | 8.189E-07 |
| 6417 | Y10B_A | E18B_A | F19B_W | S9B_A  | 1.4E-06 | 5.1E-06 | 2.730E-06 | 9.189E-07 |
| 6418 | G13B_A | K17B_A | L23B_Q | F19B_A | 9.9E-07 | 4.2E-06 | 2.730E-06 | 8.595E-07 |
| 6419 | Y10B_A | G13B_W | F3B_A  | G1B_A  | 1.8E-06 | 3.8E-06 | 2.730E-06 | 6.131E-07 |
| 6420 | G13B_A | E18B_T | L11B_A | Q14B_A | 1.6E-06 | 6.1E-06 | 2.730E-06 | 1.052E-06 |
| 6421 | Y10B_A | L11B_A | F19B_Q | G1B_A  | 1.2E-06 | 4.7E-06 | 2.730E-06 | 9.246E-07 |
| 6422 | G13B_A | E18B_T | T4B_A  | G1B_A  | 1.8E-06 | 4.5E-06 | 2.730E-06 | 8.694E-07 |
| 6423 | Y10B_A | F3B_A  | V24B_Q | Q14B_A | 1.4E-06 | 4.1E-06 | 2.730E-06 | 6.736E-07 |
| 6424 | Y10B_A | L11B_A | S5B_A  | V24B_Q | 1.5E-06 | 3.9E-06 | 2.730E-06 | 7.138E-07 |
| 6425 | Y10B_A | G1B_R  | S5B_A  | F19B_Q | 1.4E-06 | 4.6E-06 | 2.730E-06 | 9.641E-07 |
| 6426 | Y10B_A | E18B_A | V24B_T | T2B_A  | 2.0E-06 | 4.6E-06 | 2.730E-06 | 5.921E-07 |
| 6427 | Y10B_A | D6B_A  | V24B_Q | T2B_A  | 1.4E-06 | 4.9E-06 | 2.730E-06 | 8.591E-07 |
| 6428 | Y10B_A | V7B_A  | F3B_A  | S9B_A  | 1.6E-06 | 5.1E-06 | 2.730E-06 | 6.853E-07 |
| 6429 | G13B_A | A16B_N | S9B_A  | T2B_A  | 6.4E-07 | 5.6E-06 | 2.731E-06 | 1.422E-06 |
| 6430 | Y10B_A | V7B_A  | A16B_N | E18B_T | 5.5E-07 | 7.7E-06 | 2.731E-06 | 1.768E-06 |
| 6431 | G13B_A | A16B_N | L11B_A | G1B_R  | 8.1E-07 | 4.8E-06 | 2.733E-06 | 1.138E-06 |
| 6432 | Y10B_A | S5B_A  | V24B_T | G1B_A  | 1.5E-06 | 4.8E-06 | 2.735E-06 | 8.536E-07 |
| 6433 | Y10B_A | G13B_W | V7B_A  | L11B_A | 2.1E-06 | 4.0E-06 | 2.735E-06 | 5.112E-07 |
| 6434 | G13B_A | L11B_A | F19B_Q | T2B_A  | 1.1E-06 | 5.2E-06 | 2.735E-06 | 1.134E-06 |
| 6435 | Y10B_A | S8B_A  | G1B_R  | L23B_R | 1.8E-06 | 4.7E-06 | 2.735E-06 | 7.191E-07 |
| 6436 | Y10B_A | A16B_N | E18B_T | L11B_A | 6.7E-07 | 6.0E-06 | 2.735E-06 | 1.522E-06 |
| 6437 | G13B_A | S8B_A  | L23B_Q | T2B_A  | 1.2E-06 | 4.4E-06 | 2.735E-06 | 7.909E-07 |
| 6438 | Y10B_A | A16B_N | V24B_T | Q14B_A | 5.2E-07 | 4.3E-06 | 2.736E-06 | 9.233E-07 |
| 6439 | S8B_A  | D6B_A  | S5B_A  | V24B_T | 1.7E-06 | 3.7E-06 | 2.740E-06 | 5.195E-07 |
| 6440 | Y10B_A | F3B_A  | F19B_A | E12B_A | 2.2E-06 | 3.7E-06 | 2.740E-06 | 3.872E-07 |
| 6441 | Y10B_A | S5B_A  | F19B_W | E12B_A | 2.0E-06 | 4.2E-06 | 2.740E-06 | 6.320E-07 |
| 6442 | Y10B_A | T4B_A  | V24B_T | G1B_A  | 1.7E-06 | 4.1E-06 | 2.740E-06 | 5.355E-07 |
| 6443 | Y10B_A | L11B_A | V24B_Q | T2B_A  | 1.1E-06 | 4.2E-06 | 2.740E-06 | 7.577E-07 |
| 6444 | Y10B_A | V7B_A  | G1B_R  | S9B_A  | 1.4E-06 | 4.7E-06 | 2.740E-06 | 6.878E-07 |
| 6445 | G13B_A | A16B_N | E18B_T | T2B_A  | 7.2E-07 | 6.5E-06 | 2.743E-06 | 1.489E-06 |
| 6446 | Y10B_A | V7B_A  | L23B_R | T2B_A  | 1.6E-06 | 5.1E-06 | 2.745E-06 | 8.709E-07 |
| 6447 | Y10B_A | L11B_A | K17B_S | G1B_A  | 1.6E-06 | 3.9E-06 | 2.745E-06 | 6.370E-07 |

|      |        |        |        |        |         |         |           |           |
|------|--------|--------|--------|--------|---------|---------|-----------|-----------|
| 6448 | S8B_A  | V7B_A  | A16B_N | K17B_S | 1.2E-06 | 4.9E-06 | 2.745E-06 | 1.070E-06 |
| 6449 | Y10B_A | V7B_A  | F19B_W | G1B_A  | 1.6E-06 | 4.2E-06 | 2.745E-06 | 7.924E-07 |
| 6450 | G13B_A | A16B_N | F19B_A | E12B_A | 1.3E-06 | 4.9E-06 | 2.745E-06 | 9.627E-07 |
| 6451 | Y10B_A | L11B_A | G1B_R  | E12B_A | 1.7E-06 | 4.8E-06 | 2.745E-06 | 8.049E-07 |
| 6452 | S8B_A  | D6B_A  | G1B_R  | F19B_W | 1.2E-06 | 4.7E-06 | 2.745E-06 | 9.849E-07 |
| 6453 | S8B_A  | G13B_W | V7B_A  | F3B_A  | 1.8E-06 | 4.5E-06 | 2.745E-06 | 6.700E-07 |
| 6454 | Y10B_A | V7B_A  | S5B_A  | L23B_R | 1.9E-06 | 3.9E-06 | 2.745E-06 | 5.753E-07 |
| 6455 | G13B_A | G1B_R  | F19B_W | Q14B_A | 1.2E-06 | 4.4E-06 | 2.745E-06 | 8.654E-07 |
| 6456 | S8B_A  | V7B_A  | F3B_A  | S9B_A  | 1.8E-06 | 3.5E-06 | 2.745E-06 | 4.548E-07 |
| 6457 | Y10B_A | D6B_A  | A16B_N | K17B_S | 7.7E-07 | 4.0E-06 | 2.749E-06 | 8.475E-07 |
| 6458 | G13B_A | S8B_A  | E18B_A | F19B_Q | 1.5E-06 | 5.4E-06 | 2.750E-06 | 9.462E-07 |
| 6459 | G13B_A | F3B_A  | E18B_T | S5B_A  | 1.6E-06 | 4.1E-06 | 2.750E-06 | 7.178E-07 |
| 6460 | G13B_A | Y10B_A | L11B_A | S9B_A  | 1.8E-06 | 4.1E-06 | 2.750E-06 | 5.978E-07 |
| 6461 | S8B_A  | G13B_W | A16B_N | L11B_A | 6.3E-07 | 5.5E-06 | 2.752E-06 | 1.310E-06 |
| 6462 | G13B_A | D6B_A  | E18B_T | T4B_A  | 1.4E-06 | 5.1E-06 | 2.755E-06 | 1.042E-06 |
| 6463 | G13B_A | E18B_A | K17B_S | T2B_A  | 1.5E-06 | 5.1E-06 | 2.755E-06 | 8.275E-07 |
| 6464 | G13B_A | T4B_A  | S9B_A  | G1B_A  | 1.8E-06 | 5.4E-06 | 2.755E-06 | 7.564E-07 |
| 6465 | Y10B_A | T4B_A  | F19B_A | V24B_T | 1.6E-06 | 4.8E-06 | 2.755E-06 | 8.835E-07 |
| 6466 | Y10B_A | S8B_A  | E18B_A | L23B_Q | 9.2E-07 | 4.9E-06 | 2.756E-06 | 8.990E-07 |
| 6467 | G13B_A | A16B_N | F19B_Q | Q14B_A | 8.7E-07 | 6.3E-06 | 2.756E-06 | 1.482E-06 |
| 6468 | G13B_A | V7B_A  | T4B_A  | K17B_S | 2.0E-06 | 3.9E-06 | 2.760E-06 | 5.826E-07 |
| 6469 | G13B_A | A16B_N | E18B_A | E12B_A | 5.6E-07 | 4.2E-06 | 2.762E-06 | 1.003E-06 |
| 6470 | Y10B_A | G13B_W | F3B_A  | A16B_N | 9.0E-07 | 6.1E-06 | 2.763E-06 | 1.411E-06 |
| 6471 | S8B_A  | V7B_A  | A16B_N | F19B_W | 8.6E-07 | 5.5E-06 | 2.763E-06 | 1.316E-06 |
| 6472 | G13B_A | Y10B_A | S5B_A  | L23B_R | 1.6E-06 | 5.9E-06 | 2.765E-06 | 9.538E-07 |
| 6473 | G13B_A | S8B_A  | S9B_A  | G1B_A  | 1.8E-06 | 3.9E-06 | 2.765E-06 | 4.705E-07 |
| 6474 | G13B_A | A16B_N | E18B_A | F19B_W | 7.1E-07 | 4.5E-06 | 2.769E-06 | 1.080E-06 |
| 6475 | G13B_A | T4B_A  | S9B_A  | F19B_A | 1.6E-06 | 4.1E-06 | 2.770E-06 | 6.586E-07 |
| 6476 | Y10B_A | F3B_A  | A16B_N | K17B_S | 9.9E-07 | 4.6E-06 | 2.770E-06 | 1.215E-06 |
| 6477 | G13B_A | Y10B_A | S5B_A  | V24B_Q | 1.1E-06 | 4.2E-06 | 2.770E-06 | 9.286E-07 |
| 6478 | G13B_A | E18B_T | T2B_A  | G1B_A  | 1.6E-06 | 5.3E-06 | 2.770E-06 | 1.074E-06 |
| 6479 | Y10B_A | F3B_A  | T4B_A  | V24B_T | 1.7E-06 | 5.6E-06 | 2.770E-06 | 8.572E-07 |
| 6480 | Y10B_A | E18B_T | G1B_R  | F19B_A | 1.5E-06 | 6.3E-06 | 2.770E-06 | 1.050E-06 |
| 6481 | G13B_A | A16B_N | L11B_A | E12B_A | 1.0E-06 | 5.3E-06 | 2.770E-06 | 1.181E-06 |
| 6482 | Y10B_A | A16B_N | S5B_A  | L23B_Q | 5.6E-07 | 5.7E-06 | 2.771E-06 | 1.293E-06 |
| 6483 | Y10B_A | G1B_R  | K17B_A | V24B_Q | 1.8E-06 | 4.0E-06 | 2.775E-06 | 6.231E-07 |
| 6484 | G13B_A | S9B_A  | F19B_A | T2B_A  | 1.9E-06 | 4.5E-06 | 2.775E-06 | 5.981E-07 |
| 6485 | S8B_A  | D6B_A  | G13B_W | F19B_A | 1.6E-06 | 4.1E-06 | 2.775E-06 | 6.995E-07 |
| 6486 | G13B_A | V7B_A  | K17B_S | T2B_A  | 1.7E-06 | 4.7E-06 | 2.775E-06 | 8.843E-07 |
| 6487 | Y10B_A | V7B_A  | K17B_S | G1B_A  | 1.4E-06 | 4.2E-06 | 2.775E-06 | 8.967E-07 |
| 6488 | Y10B_A | E18B_A | S5B_A  | V24B_N | 1.5E-06 | 4.6E-06 | 2.775E-06 | 7.677E-07 |
| 6489 | Y10B_A | G13B_W | L11B_A | G1B_R  | 1.9E-06 | 4.1E-06 | 2.775E-06 | 6.820E-07 |
| 6490 | G13B_A | G1B_R  | Q14B_A | E12B_A | 1.8E-06 | 4.6E-06 | 2.775E-06 | 6.051E-07 |
| 6491 | Y10B_A | F3B_A  | S9B_A  | F19B_A | 1.8E-06 | 5.1E-06 | 2.775E-06 | 6.912E-07 |
| 6492 | G13B_A | T4B_A  | L23B_R | Q14B_A | 1.4E-06 | 4.3E-06 | 2.775E-06 | 8.360E-07 |
| 6493 | G13B_A | D6B_A  | S5B_A  | K17B_S | 1.8E-06 | 4.4E-06 | 2.775E-06 | 6.512E-07 |
| 6494 | G13B_A | D6B_A  | T4B_A  | F19B_Q | 1.0E-06 | 5.6E-06 | 2.775E-06 | 1.210E-06 |
| 6495 | Y10B_A | V7B_A  | T4B_A  | L23B_R | 1.6E-06 | 4.3E-06 | 2.775E-06 | 8.123E-07 |
| 6496 | G13B_A | L11B_A | E18B_A | E12B_A | 1.9E-06 | 4.2E-06 | 2.780E-06 | 5.755E-07 |
| 6497 | Y10B_A | G13B_W | F3B_A  | F19B_A | 1.7E-06 | 4.5E-06 | 2.780E-06 | 7.797E-07 |
| 6498 | Y10B_A | D6B_A  | V7B_A  | E18B_T | 1.9E-06 | 4.8E-06 | 2.780E-06 | 6.709E-07 |
| 6499 | G13B_A | A16B_N | T2B_A  | E12B_A | 8.1E-07 | 5.4E-06 | 2.781E-06 | 1.265E-06 |

|      |        |        |        |        |         |         |           |           |
|------|--------|--------|--------|--------|---------|---------|-----------|-----------|
| 6500 | S8B_A  | G13B_W | V7B_A  | F19B_A | 1.7E-06 | 5.3E-06 | 2.785E-06 | 1.004E-06 |
| 6501 | G13B_A | E18B_T | L11B_A | T2B_A  | 1.6E-06 | 5.9E-06 | 2.785E-06 | 1.060E-06 |
| 6502 | Y10B_A | G13B_W | S5B_A  | E12B_A | 2.0E-06 | 5.7E-06 | 2.785E-06 | 8.530E-07 |
| 6503 | G13B_A | E18B_A | S5B_A  | S9B_A  | 1.5E-06 | 4.4E-06 | 2.785E-06 | 6.991E-07 |
| 6504 | Y10B_A | V7B_A  | T4B_A  | V24B_N | 1.5E-06 | 4.8E-06 | 2.790E-06 | 9.580E-07 |
| 6505 | Y10B_A | S5B_A  | F19B_A | V24B_N | 1.7E-06 | 4.1E-06 | 2.790E-06 | 6.155E-07 |
| 6506 | Y10B_A | G13B_W | V7B_A  | A16B_N | 7.4E-07 | 5.2E-06 | 2.790E-06 | 1.333E-06 |
| 6507 | Y10B_A | E18B_A | V24B_Q | T2B_A  | 1.6E-06 | 4.2E-06 | 2.790E-06 | 6.431E-07 |
| 6508 | G13B_A | S8B_A  | A16B_N | S9B_A  | 1.1E-06 | 4.3E-06 | 2.790E-06 | 8.309E-07 |
| 6509 | Y10B_A | F3B_A  | A16B_N | F19B_W | 7.4E-07 | 4.4E-06 | 2.790E-06 | 1.150E-06 |
| 6510 | Y10B_A | E18B_A | T2B_A  | V24B_N | 1.9E-06 | 4.7E-06 | 2.790E-06 | 6.882E-07 |
| 6511 | Y10B_A | V7B_A  | S5B_A  | L23B_Q | 1.9E-06 | 4.8E-06 | 2.790E-06 | 8.143E-07 |
| 6512 | S8B_A  | D6B_A  | L23B_R | Q14B_A | 9.3E-07 | 4.7E-06 | 2.792E-06 | 9.115E-07 |
| 6513 | Y10B_A | L23B_R | F19B_A | Q14B_A | 1.7E-06 | 4.5E-06 | 2.795E-06 | 8.660E-07 |
| 6514 | G13B_A | S8B_A  | V24B_T | T2B_A  | 1.5E-06 | 4.2E-06 | 2.795E-06 | 7.178E-07 |
| 6515 | G13B_A | L11B_A | S5B_A  | K17B_S | 1.4E-06 | 4.0E-06 | 2.795E-06 | 7.626E-07 |
| 6516 | Y10B_A | D6B_A  | G13B_W | G1B_A  | 1.7E-06 | 4.3E-06 | 2.795E-06 | 6.848E-07 |
| 6517 | S8B_A  | G13B_W | F19B_W | T2B_A  | 1.4E-06 | 5.5E-06 | 2.795E-06 | 1.029E-06 |
| 6518 | S8B_A  | D6B_A  | V7B_A  | K17B_S | 1.5E-06 | 3.7E-06 | 2.795E-06 | 5.443E-07 |
| 6519 | G13B_A | F3B_A  | S9B_A  | T2B_A  | 1.8E-06 | 5.4E-06 | 2.795E-06 | 7.983E-07 |
| 6520 | G13B_A | Y10B_A | F3B_A  | K17B_S | 1.2E-06 | 4.6E-06 | 2.795E-06 | 9.185E-07 |
| 6521 | G13B_A | G1B_R  | S9B_A  | T2B_A  | 2.0E-06 | 4.0E-06 | 2.800E-06 | 6.070E-07 |
| 6522 | Y10B_A | D6B_A  | S9B_A  | G1B_A  | 1.7E-06 | 3.7E-06 | 2.800E-06 | 5.390E-07 |
| 6523 | Y10B_A | F3B_A  | S9B_A  | G1B_A  | 1.4E-06 | 3.9E-06 | 2.800E-06 | 5.685E-07 |
| 6524 | Y10B_A | D6B_A  | F3B_A  | E18B_T | 1.2E-06 | 4.8E-06 | 2.800E-06 | 8.754E-07 |
| 6525 | G13B_A | S9B_A  | T2B_A  | G1B_A  | 1.7E-06 | 3.9E-06 | 2.800E-06 | 5.191E-07 |
| 6526 | Y10B_A | S8B_A  | V24B_N | G1B_A  | 1.3E-06 | 5.2E-06 | 2.800E-06 | 9.884E-07 |
| 6527 | Y10B_A | L11B_A | T4B_A  | L23B_R | 1.6E-06 | 4.6E-06 | 2.800E-06 | 7.760E-07 |
| 6528 | Y10B_A | G1B_R  | L23B_Q | Q14B_A | 1.7E-06 | 4.3E-06 | 2.800E-06 | 7.787E-07 |
| 6529 | Y10B_A | K17B_A | F19B_Q | E12B_A | 9.6E-07 | 7.6E-06 | 2.803E-06 | 1.560E-06 |
| 6530 | G13B_A | E18B_A | S5B_A  | F19B_W | 1.8E-06 | 3.8E-06 | 2.805E-06 | 5.511E-07 |
| 6531 | G13B_A | F3B_A  | E18B_T | T2B_A  | 1.6E-06 | 5.0E-06 | 2.805E-06 | 8.870E-07 |
| 6532 | G13B_A | D6B_A  | T4B_A  | K17B_S | 1.6E-06 | 4.4E-06 | 2.805E-06 | 8.049E-07 |
| 6533 | G13B_A | Y10B_A | S9B_A  | G1B_A  | 1.8E-06 | 4.1E-06 | 2.805E-06 | 7.185E-07 |
| 6534 | Y10B_A | S9B_A  | F19B_A | G1B_A  | 1.7E-06 | 4.6E-06 | 2.805E-06 | 8.900E-07 |
| 6535 | G13B_A | S5B_A  | L23B_R | T2B_A  | 1.4E-06 | 4.9E-06 | 2.805E-06 | 1.026E-06 |
| 6536 | Y10B_A | A16B_N | L23B_Q | Q14B_A | 9.5E-07 | 4.6E-06 | 2.807E-06 | 9.619E-07 |
| 6537 | Y10B_A | D6B_A  | T4B_A  | V24B_N | 2.2E-06 | 4.4E-06 | 2.810E-06 | 6.398E-07 |
| 6538 | G13B_A | S9B_A  | Q14B_A | G1B_A  | 1.6E-06 | 3.7E-06 | 2.810E-06 | 6.052E-07 |
| 6539 | G13B_A | Y10B_A | G1B_R  | F19B_W | 1.5E-06 | 4.3E-06 | 2.810E-06 | 8.104E-07 |
| 6540 | G13B_A | A16B_N | L11B_A | F19B_W | 5.1E-07 | 6.9E-06 | 2.811E-06 | 1.301E-06 |
| 6541 | G13B_A | D6B_A  | E18B_A | F19B_W | 1.8E-06 | 4.3E-06 | 2.815E-06 | 8.412E-07 |
| 6542 | Y10B_A | G13B_W | E18B_A | G1B_A  | 2.0E-06 | 4.3E-06 | 2.815E-06 | 6.434E-07 |
| 6543 | G13B_A | S5B_A  | T4B_A  | L23B_Q | 1.2E-06 | 4.9E-06 | 2.815E-06 | 9.292E-07 |
| 6544 | Y10B_A | G13B_W | E18B_A | F19B_A | 1.3E-06 | 4.8E-06 | 2.815E-06 | 7.721E-07 |
| 6545 | G13B_A | Y10B_A | F3B_A  | S9B_A  | 1.5E-06 | 4.1E-06 | 2.815E-06 | 6.107E-07 |
| 6546 | G13B_A | T4B_A  | F19B_Q | Q14B_A | 1.2E-06 | 5.6E-06 | 2.815E-06 | 1.239E-06 |
| 6547 | Y10B_A | S8B_A  | E18B_A | V24B_N | 1.6E-06 | 5.1E-06 | 2.815E-06 | 7.714E-07 |
| 6548 | G13B_A | A16B_N | K17B_S | Q14B_A | 9.7E-07 | 4.1E-06 | 2.818E-06 | 8.820E-07 |
| 6549 | G13B_A | S5B_A  | L23B_Q | Q14B_A | 1.8E-06 | 4.6E-06 | 2.820E-06 | 7.991E-07 |
| 6550 | S8B_A  | D6B_A  | T4B_A  | L23B_R | 1.8E-06 | 4.0E-06 | 2.820E-06 | 6.918E-07 |
| 6551 | Y10B_A | S8B_A  | V7B_A  | L23B_R | 1.6E-06 | 4.3E-06 | 2.820E-06 | 7.743E-07 |

|      |        |        |        |        |         |         |           |           |
|------|--------|--------|--------|--------|---------|---------|-----------|-----------|
| 6552 | G13B_A | E18B_T | F19B_A | Q14B_A | 2.0E-06 | 5.6E-06 | 2.820E-06 | 8.865E-07 |
| 6553 | Y10B_A | D6B_A  | V24B_T | Q14B_A | 2.0E-06 | 3.7E-06 | 2.820E-06 | 4.708E-07 |
| 6554 | G13B_A | S5B_A  | V24B_T | Q14B_A | 1.6E-06 | 5.0E-06 | 2.820E-06 | 7.777E-07 |
| 6555 | S8B_A  | G13B_W | A16B_N | E18B_A | 5.2E-07 | 5.3E-06 | 2.820E-06 | 1.306E-06 |
| 6556 | Y10B_A | V7B_A  | F3B_A  | E18B_T | 1.8E-06 | 4.8E-06 | 2.820E-06 | 7.083E-07 |
| 6557 | Y10B_A | S8B_A  | F3B_A  | L23B_Q | 1.1E-06 | 4.3E-06 | 2.820E-06 | 7.620E-07 |
| 6558 | G13B_A | L11B_A | K17B_A | L23B_R | 1.0E-06 | 4.1E-06 | 2.820E-06 | 9.220E-07 |
| 6559 | Y10B_A | D6B_A  | V7B_A  | K17B_S | 1.9E-06 | 4.9E-06 | 2.820E-06 | 6.453E-07 |
| 6560 | Y10B_A | A16B_N | V24B_Q | Q14B_A | 7.2E-07 | 5.3E-06 | 2.821E-06 | 1.087E-06 |
| 6561 | Y10B_A | D6B_A  | E18B_T | G1B_A  | 1.5E-06 | 4.8E-06 | 2.825E-06 | 8.552E-07 |
| 6562 | Y10B_A | S8B_A  | F3B_A  | F19B_Q | 1.5E-06 | 4.3E-06 | 2.825E-06 | 9.481E-07 |
| 6563 | G13B_A | E18B_A | T4B_A  | F19B_Q | 1.3E-06 | 6.6E-06 | 2.825E-06 | 1.281E-06 |
| 6564 | Y10B_A | A16B_N | K17B_S | G1B_A  | 5.6E-07 | 4.8E-06 | 2.828E-06 | 1.261E-06 |
| 6565 | S8B_A  | D6B_A  | A16B_N | E18B_T | 6.1E-07 | 4.1E-06 | 2.830E-06 | 9.868E-07 |
| 6566 | Y10B_A | S5B_A  | T2B_A  | V24B_N | 1.2E-06 | 4.8E-06 | 2.830E-06 | 9.381E-07 |
| 6567 | Y10B_A | E18B_T | F19B_W | Q14B_A | 1.4E-06 | 5.3E-06 | 2.830E-06 | 1.049E-06 |
| 6568 | G13B_A | K17B_A | L23B_Q | G1B_A  | 1.4E-06 | 4.4E-06 | 2.830E-06 | 7.057E-07 |
| 6569 | G13B_A | Y10B_A | S8B_A  | F19B_Q | 1.6E-06 | 5.0E-06 | 2.830E-06 | 9.554E-07 |
| 6570 | S8B_A  | G13B_W | E18B_A | G1B_R  | 2.0E-06 | 3.8E-06 | 2.830E-06 | 5.243E-07 |
| 6571 | Y10B_A | G1B_R  | T4B_A  | L23B_R | 1.1E-06 | 4.8E-06 | 2.830E-06 | 8.105E-07 |
| 6572 | G13B_A | Y10B_A | E18B_A | S9B_A  | 1.6E-06 | 4.2E-06 | 2.830E-06 | 6.594E-07 |
| 6573 | Y10B_A | A16B_N | F19B_Q | G1B_A  | 5.9E-07 | 4.7E-06 | 2.834E-06 | 1.082E-06 |
| 6574 | Y10B_A | S8B_A  | D6B_A  | V24B_N | 1.4E-06 | 4.6E-06 | 2.835E-06 | 9.354E-07 |
| 6575 | Y10B_A | D6B_A  | F3B_A  | F19B_Q | 1.7E-06 | 5.4E-06 | 2.835E-06 | 9.885E-07 |
| 6576 | Y10B_A | E18B_A | T4B_A  | V24B_Q | 1.6E-06 | 4.7E-06 | 2.835E-06 | 6.769E-07 |
| 6577 | G13B_A | E18B_T | Q14B_A | G1B_A  | 1.6E-06 | 4.4E-06 | 2.835E-06 | 8.512E-07 |
| 6578 | Y10B_A | V7B_A  | K17B_S | F19B_A | 1.4E-06 | 5.7E-06 | 2.840E-06 | 1.071E-06 |
| 6579 | G13B_A | S8B_A  | F3B_A  | K17B_S | 1.9E-06 | 4.6E-06 | 2.840E-06 | 7.472E-07 |
| 6580 | G13B_A | L11B_A | S5B_A  | S9B_A  | 2.1E-06 | 3.5E-06 | 2.840E-06 | 5.355E-07 |
| 6581 | S8B_A  | G13B_W | A16B_N | G1B_R  | 1.5E-06 | 4.6E-06 | 2.840E-06 | 8.488E-07 |
| 6582 | Y10B_A | E18B_A | G1B_R  | S9B_A  | 1.7E-06 | 4.1E-06 | 2.840E-06 | 5.933E-07 |
| 6583 | Y10B_A | S8B_A  | L11B_A | L23B_R | 1.9E-06 | 5.1E-06 | 2.840E-06 | 7.923E-07 |
| 6584 | Y10B_A | D6B_A  | S5B_A  | L23B_Q | 1.5E-06 | 4.9E-06 | 2.845E-06 | 1.060E-06 |
| 6585 | G13B_A | S8B_A  | V24B_T | Q14B_A | 1.2E-06 | 4.6E-06 | 2.845E-06 | 8.581E-07 |
| 6586 | Y10B_A | D6B_A  | V24B_T | T2B_A  | 1.7E-06 | 6.0E-06 | 2.845E-06 | 9.017E-07 |
| 6587 | Y10B_A | T4B_A  | V24B_N | G1B_A  | 1.3E-06 | 3.9E-06 | 2.845E-06 | 7.550E-07 |
| 6588 | S8B_A  | D6B_A  | S5B_A  | L23B_R | 1.8E-06 | 4.4E-06 | 2.845E-06 | 6.962E-07 |
| 6589 | Y10B_A | S8B_A  | F19B_W | E12B_A | 1.6E-06 | 6.0E-06 | 2.845E-06 | 1.025E-06 |
| 6590 | Y10B_A | D6B_A  | G13B_W | L11B_A | 2.2E-06 | 4.3E-06 | 2.845E-06 | 5.165E-07 |
| 6591 | G13B_A | D6B_A  | K17B_A | V24B_Q | 1.6E-06 | 6.0E-06 | 2.845E-06 | 1.067E-06 |
| 6592 | S8B_A  | D6B_A  | T4B_A  | L23B_Q | 1.7E-06 | 4.5E-06 | 2.845E-06 | 7.366E-07 |
| 6593 | Y10B_A | V7B_A  | E18B_A | S9B_A  | 1.4E-06 | 3.9E-06 | 2.845E-06 | 6.794E-07 |
| 6594 | Y10B_A | D6B_A  | A16B_N | E18B_T | 8.1E-07 | 5.7E-06 | 2.845E-06 | 1.328E-06 |
| 6595 | G13B_A | A16B_N | S9B_A  | Q14B_A | 6.5E-07 | 4.3E-06 | 2.848E-06 | 1.016E-06 |
| 6596 | G13B_A | V7B_A  | K17B_A | L23B_R | 1.6E-06 | 4.6E-06 | 2.850E-06 | 9.185E-07 |
| 6597 | Y10B_A | A16B_N | T4B_A  | V24B_Q | 1.5E-06 | 5.3E-06 | 2.850E-06 | 1.054E-06 |
| 6598 | G13B_A | Y10B_A | F3B_A  | E18B_T | 2.1E-06 | 4.8E-06 | 2.850E-06 | 7.178E-07 |
| 6599 | Y10B_A | A16B_N | E12B_A | G1B_A  | 1.3E-06 | 4.2E-06 | 2.850E-06 | 7.186E-07 |
| 6600 | G13B_A | Y10B_A | S5B_A  | L23B_Q | 1.9E-06 | 4.8E-06 | 2.850E-06 | 7.052E-07 |
| 6601 | Y10B_A | G13B_W | E18B_T | K17B_A | 2.0E-06 | 4.1E-06 | 2.850E-06 | 6.856E-07 |
| 6602 | G13B_A | S5B_A  | L23B_R | Q14B_A | 1.9E-06 | 5.3E-06 | 2.850E-06 | 6.924E-07 |
| 6603 | G13B_A | S8B_A  | L23B_R | T2B_A  | 1.6E-06 | 5.1E-06 | 2.850E-06 | 1.016E-06 |



|      |        |        |        |        |         |         |           |           |
|------|--------|--------|--------|--------|---------|---------|-----------|-----------|
| 6604 | Y10B_A | D6B_A  | F3B_A  | S9B_A  | 1.7E-06 | 4.2E-06 | 2.855E-06 | 5.853E-07 |
| 6605 | G13B_A | F19B_W | Q14B_A | G1B_A  | 1.5E-06 | 4.9E-06 | 2.855E-06 | 8.805E-07 |
| 6606 | Y10B_A | G13B_W | S5B_A  | F19B_W | 1.5E-06 | 4.9E-06 | 2.855E-06 | 8.388E-07 |
| 6607 | Y10B_A | D6B_A  | L23B_Q | Q14B_A | 1.4E-06 | 4.5E-06 | 2.855E-06 | 7.891E-07 |
| 6608 | G13B_A | S8B_A  | V7B_A  | E18B_T | 1.6E-06 | 5.6E-06 | 2.860E-06 | 1.046E-06 |
| 6609 | G13B_A | E18B_A | K17B_A | F19B_Q | 1.4E-06 | 4.5E-06 | 2.860E-06 | 8.022E-07 |
| 6610 | G13B_A | A16B_N | T4B_A  | K17B_S | 1.1E-06 | 5.1E-06 | 2.860E-06 | 9.242E-07 |
| 6611 | G13B_A | A16B_N | K17B_A | L23B_Q | 1.0E-06 | 4.8E-06 | 2.860E-06 | 1.015E-06 |
| 6612 | S8B_A  | D6B_A  | S5B_A  | L23B_Q | 1.7E-06 | 5.5E-06 | 2.860E-06 | 8.537E-07 |
| 6613 | Y10B_A | G13B_W | T4B_A  | E12B_A | 1.2E-06 | 5.4E-06 | 2.860E-06 | 8.947E-07 |
| 6614 | Y10B_A | F3B_A  | A16B_N | E12B_A | 1.0E-06 | 5.1E-06 | 2.860E-06 | 1.265E-06 |
| 6615 | S8B_A  | D6B_A  | G1B_R  | S9B_A  | 1.5E-06 | 4.8E-06 | 2.865E-06 | 8.412E-07 |
| 6616 | Y10B_A | S8B_A  | E18B_A | L23B_R | 2.0E-06 | 4.0E-06 | 2.865E-06 | 6.141E-07 |
| 6617 | G13B_A | E18B_A | T4B_A  | K17B_S | 1.3E-06 | 4.7E-06 | 2.870E-06 | 8.033E-07 |
| 6618 | G13B_A | V7B_A  | F19B_W | T2B_A  | 1.6E-06 | 4.9E-06 | 2.870E-06 | 8.310E-07 |
| 6619 | S8B_A  | D6B_A  | V7B_A  | E18B_T | 2.0E-06 | 5.2E-06 | 2.870E-06 | 7.399E-07 |
| 6620 | Y10B_A | V7B_A  | S9B_A  | G1B_A  | 1.7E-06 | 4.6E-06 | 2.870E-06 | 7.035E-07 |
| 6621 | Y10B_A | F3B_A  | F19B_Q | T2B_A  | 8.7E-07 | 5.6E-06 | 2.874E-06 | 1.249E-06 |
| 6622 | Y10B_A | A16B_N | E18B_A | K17B_S | 5.3E-07 | 4.6E-06 | 2.874E-06 | 1.251E-06 |
| 6623 | S8B_A  | D6B_A  | L23B_R | T2B_A  | 1.8E-06 | 4.0E-06 | 2.875E-06 | 6.576E-07 |
| 6624 | Y10B_A | A16B_N | V24B_T | T2B_A  | 1.4E-06 | 5.1E-06 | 2.875E-06 | 9.193E-07 |
| 6625 | G13B_A | S5B_A  | T4B_A  | L23B_R | 1.6E-06 | 5.1E-06 | 2.875E-06 | 8.201E-07 |
| 6626 | Y10B_A | V7B_A  | E18B_T | F19B_A | 1.4E-06 | 6.0E-06 | 2.875E-06 | 1.041E-06 |
| 6627 | Y10B_A | S8B_A  | A16B_N | K17B_S | 1.2E-06 | 6.3E-06 | 2.875E-06 | 1.176E-06 |
| 6628 | Y10B_A | S8B_A  | V7B_A  | L23B_Q | 1.6E-06 | 4.8E-06 | 2.880E-06 | 8.594E-07 |
| 6629 | Y10B_A | V7B_A  | E18B_T | G1B_A  | 1.8E-06 | 4.5E-06 | 2.880E-06 | 8.121E-07 |
| 6630 | G13B_A | F3B_A  | L11B_A | F19B_A | 2.0E-06 | 3.8E-06 | 2.880E-06 | 6.170E-07 |
| 6631 | G13B_A | A16B_N | F19B_W | T4B_A  | 1.3E-06 | 5.5E-06 | 2.880E-06 | 1.087E-06 |
| 6632 | Y10B_A | S8B_A  | E18B_T | E12B_A | 1.9E-06 | 4.7E-06 | 2.880E-06 | 7.530E-07 |
| 6633 | Y10B_A | D6B_A  | T4B_A  | L23B_Q | 1.5E-06 | 4.7E-06 | 2.880E-06 | 9.076E-07 |
| 6634 | Y10B_A | S8B_A  | V24B_Q | G1B_A  | 1.5E-06 | 5.6E-06 | 2.885E-06 | 8.786E-07 |
| 6635 | Y10B_A | L11B_A | T4B_A  | F19B_Q | 1.1E-06 | 5.7E-06 | 2.885E-06 | 1.124E-06 |
| 6636 | Y10B_A | G13B_W | L11B_A | E18B_A | 1.9E-06 | 4.1E-06 | 2.885E-06 | 6.098E-07 |
| 6637 | Y10B_A | G13B_W | G1B_R  | F19B_A | 1.4E-06 | 4.9E-06 | 2.885E-06 | 9.034E-07 |
| 6638 | S8B_A  | D6B_A  | V24B_T | Q14B_A | 1.9E-06 | 4.2E-06 | 2.885E-06 | 6.368E-07 |
| 6639 | Y10B_A | V7B_A  | T4B_A  | F19B_Q | 1.7E-06 | 4.8E-06 | 2.885E-06 | 9.275E-07 |
| 6640 | Y10B_A | E18B_A | S5B_A  | V24B_T | 1.9E-06 | 4.2E-06 | 2.885E-06 | 6.627E-07 |
| 6641 | S8B_A  | G13B_W | V7B_A  | L11B_A | 1.7E-06 | 5.2E-06 | 2.885E-06 | 8.719E-07 |
| 6642 | G13B_A | F3B_A  | A16B_N | L11B_A | 7.4E-07 | 5.2E-06 | 2.887E-06 | 1.551E-06 |
| 6643 | Y10B_A | A16B_N | K17B_A | V24B_Q | 8.5E-07 | 7.0E-06 | 2.887E-06 | 1.426E-06 |
| 6644 | G13B_A | S8B_A  | V7B_A  | S9B_A  | 1.8E-06 | 5.3E-06 | 2.889E-06 | 8.831E-07 |
| 6645 | Y10B_A | D6B_A  | E18B_A | K17B_S | 1.1E-06 | 3.8E-06 | 2.890E-06 | 6.789E-07 |
| 6646 | G13B_A | L23B_R | Q14B_A | T2B_A  | 1.7E-06 | 4.3E-06 | 2.890E-06 | 7.650E-07 |
| 6647 | G13B_A | Y10B_A | T4B_A  | L23B_Q | 1.9E-06 | 3.9E-06 | 2.890E-06 | 6.121E-07 |
| 6648 | G13B_A | F3B_A  | K17B_A | F19B_Q | 1.5E-06 | 4.5E-06 | 2.890E-06 | 8.045E-07 |
| 6649 | Y10B_A | D6B_A  | S5B_A  | V24B_T | 2.2E-06 | 3.9E-06 | 2.890E-06 | 5.210E-07 |
| 6650 | Y10B_A | S5B_A  | L23B_Q | F19B_A | 1.9E-06 | 5.7E-06 | 2.890E-06 | 1.056E-06 |
| 6651 | G13B_A | Y10B_A | L23B_R | Q14B_A | 1.6E-06 | 5.3E-06 | 2.890E-06 | 8.813E-07 |
| 6652 | G13B_A | Y10B_A | A16B_N | E12B_A | 7.2E-07 | 5.7E-06 | 2.892E-06 | 1.472E-06 |
| 6653 | G13B_A | L11B_A | K17B_A | V24B_T | 1.5E-06 | 5.0E-06 | 2.895E-06 | 8.876E-07 |
| 6654 | Y10B_A | D6B_A  | T4B_A  | V24B_T | 2.0E-06 | 4.1E-06 | 2.895E-06 | 5.652E-07 |
| 6655 | G13B_A | D6B_A  | K17B_A | L23B_R | 1.4E-06 | 5.1E-06 | 2.895E-06 | 1.102E-06 |

|      |        |        |        |        |         |         |           |           |
|------|--------|--------|--------|--------|---------|---------|-----------|-----------|
| 6656 | Y10B_A | D6B_A  | T2B_A  | V24B_N | 1.6E-06 | 6.0E-06 | 2.895E-06 | 1.014E-06 |
| 6657 | G13B_A | Y10B_A | T4B_A  | L23B_R | 1.6E-06 | 4.8E-06 | 2.895E-06 | 7.536E-07 |
| 6658 | Y10B_A | G13B_W | F3B_A  | L11B_A | 1.8E-06 | 4.5E-06 | 2.895E-06 | 7.688E-07 |
| 6659 | Y10B_A | S5B_A  | S9B_A  | E12B_A | 2.0E-06 | 4.0E-06 | 2.895E-06 | 5.520E-07 |
| 6660 | Y10B_A | F3B_A  | L11B_A | E12B_A | 2.0E-06 | 4.2E-06 | 2.900E-06 | 5.740E-07 |
| 6661 | Y10B_A | F19B_W | Q14B_A | E12B_A | 1.6E-06 | 4.6E-06 | 2.900E-06 | 7.766E-07 |
| 6662 | Y10B_A | G13B_W | F3B_A  | E18B_A | 2.1E-06 | 5.2E-06 | 2.900E-06 | 7.226E-07 |
| 6663 | G13B_A | Y10B_A | A16B_N | S9B_A  | 7.6E-07 | 4.8E-06 | 2.905E-06 | 1.147E-06 |
| 6664 | G13B_A | F3B_A  | S5B_A  | S9B_A  | 1.4E-06 | 4.3E-06 | 2.905E-06 | 7.345E-07 |
| 6665 | G13B_A | K17B_S | F19B_A | T2B_A  | 1.6E-06 | 4.9E-06 | 2.905E-06 | 8.900E-07 |
| 6666 | Y10B_A | K17B_A | L23B_R | E12B_A | 1.3E-06 | 5.0E-06 | 2.905E-06 | 1.080E-06 |
| 6667 | G13B_A | S8B_A  | K17B_A | V24B_Q | 1.3E-06 | 5.3E-06 | 2.905E-06 | 9.110E-07 |
| 6668 | Y10B_A | V7B_A  | F19B_A | E12B_A | 2.0E-06 | 4.4E-06 | 2.905E-06 | 5.726E-07 |
| 6669 | G13B_A | S8B_A  | G1B_R  | F19B_W | 1.6E-06 | 4.6E-06 | 2.905E-06 | 9.105E-07 |
| 6670 | G13B_A | Y10B_A | G1B_R  | E12B_A | 1.6E-06 | 4.1E-06 | 2.910E-06 | 5.711E-07 |
| 6671 | Y10B_A | E18B_T | K17B_A | F19B_W | 1.7E-06 | 4.8E-06 | 2.910E-06 | 9.760E-07 |
| 6672 | G13B_A | E18B_T | L11B_A | S5B_A  | 1.3E-06 | 5.0E-06 | 2.910E-06 | 1.074E-06 |
| 6673 | G13B_A | S8B_A  | T4B_A  | L23B_R | 1.7E-06 | 4.8E-06 | 2.910E-06 | 8.765E-07 |
| 6674 | G13B_A | E18B_T | G1B_R  | Q14B_A | 1.7E-06 | 5.2E-06 | 2.910E-06 | 9.727E-07 |
| 6675 | S8B_A  | G13B_W | V7B_A  | G1B_A  | 2.1E-06 | 5.5E-06 | 2.915E-06 | 7.714E-07 |
| 6676 | Y10B_A | G13B_W | L11B_A | G1B_A  | 1.5E-06 | 4.7E-06 | 2.915E-06 | 8.362E-07 |
| 6677 | G13B_A | Y10B_A | S8B_A  | L23B_R | 1.9E-06 | 4.1E-06 | 2.915E-06 | 6.699E-07 |
| 6678 | G13B_A | V7B_A  | E18B_T | T4B_A  | 1.6E-06 | 6.1E-06 | 2.915E-06 | 1.135E-06 |
| 6679 | G13B_A | L11B_A | S9B_A  | T2B_A  | 1.5E-06 | 4.1E-06 | 2.915E-06 | 7.206E-07 |
| 6680 | Y10B_A | D6B_A  | G1B_R  | K17B_S | 1.4E-06 | 4.3E-06 | 2.915E-06 | 8.543E-07 |
| 6681 | G13B_A | T4B_A  | L23B_Q | Q14B_A | 1.5E-06 | 4.6E-06 | 2.915E-06 | 8.774E-07 |
| 6682 | Y10B_A | G1B_R  | K17B_S | Q14B_A | 1.5E-06 | 4.2E-06 | 2.915E-06 | 8.792E-07 |
| 6683 | S8B_A  | G13B_W | E18B_A | F19B_A | 1.8E-06 | 4.1E-06 | 2.915E-06 | 6.115E-07 |
| 6684 | Y10B_A | E18B_A | Q14B_A | V24B_N | 1.4E-06 | 5.1E-06 | 2.920E-06 | 9.006E-07 |
| 6685 | Y10B_A | E18B_A | T4B_A  | L23B_Q | 1.6E-06 | 5.2E-06 | 2.920E-06 | 8.703E-07 |
| 6686 | G13B_A | V7B_A  | S9B_A  | T2B_A  | 2.1E-06 | 4.3E-06 | 2.920E-06 | 4.959E-07 |
| 6687 | S8B_A  | G13B_W | F3B_A  | L11B_A | 1.7E-06 | 4.6E-06 | 2.920E-06 | 7.083E-07 |
| 6688 | G13B_A | L11B_A | E18B_A | F19B_W | 1.0E-06 | 6.6E-06 | 2.920E-06 | 1.358E-06 |
| 6689 | G13B_A | A16B_N | K17B_A | F19B_Q | 1.1E-06 | 4.6E-06 | 2.920E-06 | 9.429E-07 |
| 6690 | G13B_A | D6B_A  | E18B_T | S5B_A  | 1.9E-06 | 5.1E-06 | 2.920E-06 | 7.818E-07 |
| 6691 | G13B_A | V7B_A  | F19B_W | Q14B_A | 1.3E-06 | 5.5E-06 | 2.920E-06 | 1.019E-06 |
| 6692 | G13B_A | T4B_A  | F19B_Q | T2B_A  | 1.0E-06 | 5.8E-06 | 2.925E-06 | 1.282E-06 |
| 6693 | G13B_A | F19B_W | T4B_A  | G1B_A  | 1.7E-06 | 4.7E-06 | 2.925E-06 | 7.559E-07 |
| 6694 | G13B_A | D6B_A  | T4B_A  | L23B_R | 1.3E-06 | 7.8E-06 | 2.925E-06 | 1.347E-06 |
| 6695 | Y10B_A | D6B_A  | Q14B_A | V24B_N | 1.6E-06 | 4.2E-06 | 2.925E-06 | 7.799E-07 |
| 6696 | G13B_A | L11B_A | F19B_W | Q14B_A | 1.8E-06 | 4.7E-06 | 2.930E-06 | 7.284E-07 |
| 6697 | G13B_A | K17B_A | V24B_Q | T2B_A  | 1.3E-06 | 6.3E-06 | 2.930E-06 | 1.129E-06 |
| 6698 | Y10B_A | S8B_A  | E18B_A | V24B_T | 2.2E-06 | 3.7E-06 | 2.930E-06 | 4.646E-07 |
| 6699 | G13B_A | E18B_A | F19B_W | T2B_A  | 1.6E-06 | 5.0E-06 | 2.930E-06 | 8.342E-07 |
| 6700 | G13B_A | E18B_A | S5B_A  | K17B_S | 1.3E-06 | 5.4E-06 | 2.935E-06 | 9.337E-07 |
| 6701 | S8B_A  | G13B_W | E18B_A | G1B_A  | 1.9E-06 | 3.8E-06 | 2.935E-06 | 6.029E-07 |
| 6702 | G13B_A | Y10B_A | V24B_T | T2B_A  | 1.8E-06 | 5.0E-06 | 2.935E-06 | 7.307E-07 |
| 6703 | G13B_A | D6B_A  | L11B_A | G1B_R  | 1.8E-06 | 4.0E-06 | 2.940E-06 | 6.451E-07 |
| 6704 | G13B_A | S5B_A  | F19B_W | G1B_A  | 1.4E-06 | 5.0E-06 | 2.940E-06 | 1.124E-06 |
| 6705 | Y10B_A | L11B_A | E18B_A | K17B_S | 1.3E-06 | 4.9E-06 | 2.940E-06 | 1.002E-06 |
| 6706 | S8B_A  | G13B_W | S5B_A  | E12B_A | 2.0E-06 | 4.6E-06 | 2.940E-06 | 6.931E-07 |
| 6707 | S8B_A  | D6B_A  | E18B_T | L11B_A | 1.6E-06 | 5.1E-06 | 2.940E-06 | 9.484E-07 |

|      |        |        |        |        |         |         |           |           |
|------|--------|--------|--------|--------|---------|---------|-----------|-----------|
| 6708 | G13B_A | Y10B_A | L23B_R | T2B_A  | 1.6E-06 | 4.9E-06 | 2.940E-06 | 9.886E-07 |
| 6709 | G13B_A | K17B_A | L23B_R | F19B_A | 1.3E-06 | 5.0E-06 | 2.940E-06 | 1.040E-06 |
| 6710 | G13B_A | S8B_A  | F3B_A  | F19B_W | 1.7E-06 | 4.7E-06 | 2.940E-06 | 7.507E-07 |
| 6711 | Y10B_A | S8B_A  | G1B_R  | F19B_Q | 1.4E-06 | 4.4E-06 | 2.940E-06 | 9.981E-07 |
| 6712 | G13B_A | S8B_A  | A16B_N | E12B_A | 8.5E-07 | 5.2E-06 | 2.943E-06 | 1.218E-06 |
| 6713 | S8B_A  | D6B_A  | G13B_W | G1B_A  | 1.8E-06 | 4.3E-06 | 2.945E-06 | 7.022E-07 |
| 6714 | Y10B_A | L11B_A | S5B_A  | V24B_T | 1.4E-06 | 4.8E-06 | 2.945E-06 | 8.249E-07 |
| 6715 | Y10B_A | G13B_W | V7B_A  | F3B_A  | 1.7E-06 | 3.8E-06 | 2.945E-06 | 5.395E-07 |
| 6716 | Y10B_A | V7B_A  | L23B_R | Q14B_A | 2.2E-06 | 3.7E-06 | 2.945E-06 | 4.740E-07 |
| 6717 | G13B_A | S8B_A  | F19B_Q | Q14B_A | 1.5E-06 | 5.0E-06 | 2.945E-06 | 9.966E-07 |
| 6718 | S8B_A  | D6B_A  | G1B_R  | K17B_S | 1.4E-06 | 4.7E-06 | 2.945E-06 | 8.829E-07 |
| 6719 | G13B_A | Y10B_A | E18B_A | K17B_S | 1.7E-06 | 4.7E-06 | 2.945E-06 | 6.436E-07 |
| 6720 | Y10B_A | D6B_A  | T4B_A  | F19B_Q | 1.9E-06 | 4.1E-06 | 2.950E-06 | 7.416E-07 |
| 6721 | Y10B_A | G1B_R  | F19B_A | E12B_A | 1.9E-06 | 3.9E-06 | 2.950E-06 | 5.726E-07 |
| 6722 | Y10B_A | D6B_A  | F19B_W | G1B_A  | 1.6E-06 | 6.1E-06 | 2.950E-06 | 1.151E-06 |
| 6723 | Y10B_A | G1B_R  | K17B_A | V24B_N | 1.5E-06 | 5.9E-06 | 2.950E-06 | 9.881E-07 |
| 6724 | G13B_A | S8B_A  | L23B_R | Q14B_A | 1.8E-06 | 5.1E-06 | 2.950E-06 | 9.785E-07 |
| 6725 | Y10B_A | G13B_W | A16B_N | G1B_R  | 8.5E-07 | 4.1E-06 | 2.952E-06 | 9.176E-07 |
| 6726 | Y10B_A | L23B_R | Q14B_A | G1B_A  | 1.8E-06 | 5.3E-06 | 2.955E-06 | 8.281E-07 |
| 6727 | Y10B_A | F3B_A  | G1B_R  | F19B_W | 1.6E-06 | 5.1E-06 | 2.955E-06 | 9.736E-07 |
| 6728 | G13B_A | S8B_A  | F3B_A  | S9B_A  | 1.8E-06 | 4.2E-06 | 2.955E-06 | 6.091E-07 |
| 6729 | Y10B_A | S9B_A  | T2B_A  | E12B_A | 1.9E-06 | 6.8E-06 | 2.960E-06 | 1.052E-06 |
| 6730 | Y10B_A | D6B_A  | L11B_A | K17B_S | 1.5E-06 | 4.2E-06 | 2.960E-06 | 7.528E-07 |
| 6731 | G13B_A | Y10B_A | K17B_S | F19B_A | 1.5E-06 | 4.7E-06 | 2.960E-06 | 8.146E-07 |
| 6732 | G13B_A | D6B_A  | T4B_A  | S9B_A  | 1.6E-06 | 4.2E-06 | 2.960E-06 | 6.202E-07 |
| 6733 | Y10B_A | E18B_A | T4B_A  | V24B_T | 2.0E-06 | 4.6E-06 | 2.960E-06 | 7.037E-07 |
| 6734 | Y10B_A | V7B_A  | K17B_A | V24B_N | 2.0E-06 | 4.3E-06 | 2.965E-06 | 7.883E-07 |
| 6735 | S8B_A  | G13B_W | K17B_A | S9B_A  | 2.1E-06 | 4.0E-06 | 2.965E-06 | 4.902E-07 |
| 6736 | G13B_A | K17B_A | V24B_Q | Q14B_A | 1.4E-06 | 4.6E-06 | 2.965E-06 | 7.184E-07 |
| 6737 | G13B_A | G1B_R  | S5B_A  | E12B_A | 1.8E-06 | 6.2E-06 | 2.965E-06 | 9.588E-07 |
| 6738 | G13B_A | G1B_R  | S5B_A  | F19B_W | 1.1E-06 | 6.0E-06 | 2.965E-06 | 1.040E-06 |
| 6739 | G13B_A | S8B_A  | L11B_A | E12B_A | 1.7E-06 | 4.4E-06 | 2.970E-06 | 7.456E-07 |
| 6740 | Y10B_A | G13B_W | L11B_A | F19B_A | 1.8E-06 | 5.3E-06 | 2.970E-06 | 9.359E-07 |
| 6741 | Y10B_A | S8B_A  | F19B_Q | G1B_A  | 1.2E-06 | 5.3E-06 | 2.970E-06 | 1.187E-06 |
| 6742 | G13B_A | S8B_A  | D6B_A  | K17B_S | 1.5E-06 | 4.7E-06 | 2.970E-06 | 8.968E-07 |
| 6743 | Y10B_A | F3B_A  | F19B_W | G1B_A  | 1.5E-06 | 5.5E-06 | 2.970E-06 | 1.038E-06 |
| 6744 | S8B_A  | D6B_A  | S9B_A  | F19B_A | 2.2E-06 | 7.1E-06 | 2.970E-06 | 1.086E-06 |
| 6745 | Y10B_A | S8B_A  | D6B_A  | L23B_Q | 1.1E-06 | 5.5E-06 | 2.970E-06 | 1.109E-06 |
| 6746 | Y10B_A | E18B_A | L23B_R | Q14B_A | 1.7E-06 | 4.0E-06 | 2.970E-06 | 6.974E-07 |
| 6747 | G13B_A | L11B_A | S5B_A  | E12B_A | 1.9E-06 | 4.6E-06 | 2.970E-06 | 6.989E-07 |
| 6748 | S8B_A  | D6B_A  | E18B_A | F19B_Q | 1.1E-06 | 6.8E-06 | 2.970E-06 | 1.353E-06 |
| 6749 | Y10B_A | S8B_A  | G1B_R  | K17B_S | 1.9E-06 | 4.7E-06 | 2.975E-06 | 6.942E-07 |
| 6750 | Y10B_A | D6B_A  | G13B_W | F3B_A  | 1.3E-06 | 4.2E-06 | 2.975E-06 | 6.496E-07 |
| 6751 | Y10B_A | A16B_N | K17B_A | V24B_N | 7.2E-07 | 5.7E-06 | 2.978E-06 | 1.474E-06 |
| 6752 | Y10B_A | F3B_A  | F19B_Q | Q14B_A | 1.5E-06 | 6.1E-06 | 2.980E-06 | 1.245E-06 |
| 6753 | G13B_A | D6B_A  | S9B_A  | Q14B_A | 2.1E-06 | 5.4E-06 | 2.980E-06 | 8.402E-07 |
| 6754 | G13B_A | S8B_A  | K17B_A | V24B_N | 1.9E-06 | 3.9E-06 | 2.985E-06 | 5.797E-07 |
| 6755 | G13B_A | L11B_A | T2B_A  | E12B_A | 1.2E-06 | 5.1E-06 | 2.985E-06 | 9.917E-07 |
| 6756 | S8B_A  | D6B_A  | A16B_N | F19B_W | 6.7E-07 | 6.6E-06 | 2.988E-06 | 1.518E-06 |
| 6757 | S8B_A  | D6B_A  | L23B_Q | T2B_A  | 1.0E-06 | 4.7E-06 | 2.990E-06 | 9.107E-07 |
| 6758 | S8B_A  | D6B_A  | V7B_A  | S9B_A  | 1.6E-06 | 4.2E-06 | 2.990E-06 | 6.164E-07 |
| 6759 | G13B_A | V7B_A  | F19B_W | T4B_A  | 1.4E-06 | 4.9E-06 | 2.990E-06 | 9.250E-07 |

|      |        |        |        |        |         |         |           |           |
|------|--------|--------|--------|--------|---------|---------|-----------|-----------|
| 6760 | S8B_A  | D6B_A  | V24B_T | T2B_A  | 1.9E-06 | 6.3E-06 | 2.990E-06 | 1.023E-06 |
| 6761 | Y10B_A | F3B_A  | L11B_A | F19B_W | 1.4E-06 | 4.5E-06 | 2.990E-06 | 7.993E-07 |
| 6762 | G13B_A | S5B_A  | T4B_A  | F19B_Q | 1.6E-06 | 5.6E-06 | 2.990E-06 | 1.183E-06 |
| 6763 | S8B_A  | D6B_A  | G13B_W | A16B_N | 7.9E-07 | 5.5E-06 | 2.994E-06 | 1.399E-06 |
| 6764 | S8B_A  | D6B_A  | F19B_W | G1B_A  | 1.4E-06 | 5.7E-06 | 2.995E-06 | 1.089E-06 |
| 6765 | Y10B_A | A16B_N | E18B_T | F19B_A | 9.4E-07 | 6.0E-06 | 2.996E-06 | 1.302E-06 |
| 6766 | Y10B_A | F3B_A  | T4B_A  | L23B_R | 1.8E-06 | 4.6E-06 | 3.000E-06 | 7.934E-07 |
| 6767 | Y10B_A | D6B_A  | G1B_R  | S9B_A  | 2.1E-06 | 5.0E-06 | 3.000E-06 | 7.636E-07 |
| 6768 | Y10B_A | A16B_N | V24B_Q | T2B_A  | 8.5E-07 | 6.2E-06 | 3.004E-06 | 1.432E-06 |
| 6769 | G13B_A | S8B_A  | T4B_A  | F19B_Q | 1.7E-06 | 5.8E-06 | 3.005E-06 | 1.025E-06 |
| 6770 | Y10B_A | F3B_A  | L23B_R | T2B_A  | 1.6E-06 | 6.3E-06 | 3.005E-06 | 1.288E-06 |
| 6771 | Y10B_A | G13B_W | K17B_A | S9B_A  | 1.7E-06 | 4.3E-06 | 3.005E-06 | 6.661E-07 |
| 6772 | Y10B_A | L11B_A | S5B_A  | L23B_R | 1.4E-06 | 4.3E-06 | 3.005E-06 | 6.848E-07 |
| 6773 | G13B_A | S8B_A  | F3B_A  | E12B_A | 1.7E-06 | 4.4E-06 | 3.005E-06 | 7.273E-07 |
| 6774 | G13B_A | Y10B_A | E18B_T | F19B_A | 2.0E-06 | 5.1E-06 | 3.005E-06 | 8.147E-07 |
| 6775 | G13B_A | S8B_A  | G1B_R  | E12B_A | 1.7E-06 | 4.5E-06 | 3.010E-06 | 6.958E-07 |
| 6776 | S8B_A  | D6B_A  | S9B_A  | G1B_A  | 1.9E-06 | 6.0E-06 | 3.010E-06 | 9.553E-07 |
| 6777 | G13B_A | F3B_A  | S5B_A  | E12B_A | 2.2E-06 | 4.9E-06 | 3.010E-06 | 7.055E-07 |
| 6778 | G13B_A | D6B_A  | E18B_T | Q14B_A | 1.7E-06 | 4.4E-06 | 3.015E-06 | 7.534E-07 |
| 6779 | Y10B_A | D6B_A  | F19B_Q | Q14B_A | 1.3E-06 | 5.3E-06 | 3.015E-06 | 1.164E-06 |
| 6780 | G13B_A | Y10B_A | D6B_A  | E18B_T | 1.6E-06 | 5.1E-06 | 3.015E-06 | 9.810E-07 |
| 6781 | G13B_A | D6B_A  | A16B_N | E12B_A | 1.3E-06 | 5.5E-06 | 3.015E-06 | 9.681E-07 |
| 6782 | Y10B_A | S8B_A  | A16B_N | E18B_T | 8.9E-07 | 5.1E-06 | 3.017E-06 | 1.397E-06 |
| 6783 | Y10B_A | S8B_A  | D6B_A  | V24B_Q | 1.9E-06 | 5.7E-06 | 3.020E-06 | 9.367E-07 |
| 6784 | G13B_A | Y10B_A | T4B_A  | F19B_Q | 1.4E-06 | 5.0E-06 | 3.020E-06 | 9.790E-07 |
| 6785 | G13B_A | D6B_A  | K17B_A | V24B_T | 1.3E-06 | 5.1E-06 | 3.020E-06 | 9.220E-07 |
| 6786 | S8B_A  | D6B_A  | F3B_A  | E18B_T | 1.8E-06 | 4.6E-06 | 3.020E-06 | 8.673E-07 |
| 6787 | Y10B_A | F3B_A  | E18B_A | S9B_A  | 2.0E-06 | 4.9E-06 | 3.020E-06 | 7.682E-07 |
| 6788 | Y10B_A | V7B_A  | A16B_N | E12B_A | 5.0E-07 | 6.4E-06 | 3.022E-06 | 1.583E-06 |
| 6789 | G13B_A | A16B_N | S5B_A  | E12B_A | 8.1E-07 | 5.7E-06 | 3.023E-06 | 1.658E-06 |
| 6790 | Y10B_A | S8B_A  | A16B_N | L23B_Q | 7.7E-07 | 5.2E-06 | 3.023E-06 | 1.162E-06 |
| 6791 | Y10B_A | S8B_A  | T2B_A  | V24B_N | 1.7E-06 | 4.3E-06 | 3.025E-06 | 7.070E-07 |
| 6792 | G13B_A | Y10B_A | D6B_A  | S9B_A  | 2.1E-06 | 4.4E-06 | 3.025E-06 | 6.544E-07 |
| 6793 | Y10B_A | S8B_A  | D6B_A  | L23B_R | 1.8E-06 | 5.7E-06 | 3.025E-06 | 8.777E-07 |
| 6794 | Y10B_A | L11B_A | F19B_Q | Q14B_A | 2.0E-06 | 6.1E-06 | 3.030E-06 | 9.443E-07 |
| 6795 | G13B_A | L11B_A | S9B_A  | Q14B_A | 1.9E-06 | 4.6E-06 | 3.030E-06 | 6.578E-07 |
| 6796 | S8B_A  | G13B_W | T4B_A  | E12B_A | 1.9E-06 | 5.7E-06 | 3.030E-06 | 8.712E-07 |
| 6797 | Y10B_A | S8B_A  | A16B_N | V24B_T | 5.2E-07 | 6.2E-06 | 3.031E-06 | 1.380E-06 |
| 6798 | G13B_A | K17B_A | F19B_Q | G1B_A  | 8.7E-07 | 5.6E-06 | 3.033E-06 | 1.256E-06 |
| 6799 | Y10B_A | L11B_A | S5B_A  | K17B_S | 1.4E-06 | 4.9E-06 | 3.035E-06 | 8.762E-07 |
| 6800 | Y10B_A | L11B_A | V24B_T | Q14B_A | 1.9E-06 | 4.8E-06 | 3.035E-06 | 8.113E-07 |
| 6801 | G13B_A | D6B_A  | S5B_A  | S9B_A  | 2.0E-06 | 4.4E-06 | 3.035E-06 | 6.761E-07 |
| 6802 | Y10B_A | T4B_A  | T2B_A  | V24B_N | 1.9E-06 | 6.3E-06 | 3.035E-06 | 1.207E-06 |
| 6803 | Y10B_A | F3B_A  | T4B_A  | K17B_S | 1.9E-06 | 3.7E-06 | 3.035E-06 | 6.175E-07 |
| 6804 | Y10B_A | G1B_R  | K17B_A | V24B_T | 1.8E-06 | 5.0E-06 | 3.035E-06 | 6.556E-07 |
| 6805 | Y10B_A | D6B_A  | L23B_Q | T2B_A  | 1.5E-06 | 4.4E-06 | 3.040E-06 | 7.199E-07 |
| 6806 | S8B_A  | D6B_A  | E18B_A | K17B_S | 1.9E-06 | 5.0E-06 | 3.040E-06 | 7.163E-07 |
| 6807 | Y10B_A | E18B_T | L11B_A | F19B_A | 1.8E-06 | 4.8E-06 | 3.040E-06 | 9.472E-07 |
| 6808 | Y10B_A | V7B_A  | S5B_A  | F19B_Q | 1.7E-06 | 5.0E-06 | 3.040E-06 | 1.048E-06 |
| 6809 | G13B_A | F3B_A  | S5B_A  | F19B_W | 1.8E-06 | 4.2E-06 | 3.040E-06 | 7.619E-07 |
| 6810 | Y10B_A | E18B_A | F19B_W | G1B_A  | 1.4E-06 | 4.4E-06 | 3.040E-06 | 8.623E-07 |
| 6811 | G13B_A | F3B_A  | L11B_A | G1B_R  | 2.0E-06 | 4.1E-06 | 3.040E-06 | 5.134E-07 |

|      |        |        |        |        |         |         |           |           |
|------|--------|--------|--------|--------|---------|---------|-----------|-----------|
| 6812 | S8B_A  | D6B_A  | T4B_A  | F19B_Q | 1.6E-06 | 6.0E-06 | 3.040E-06 | 1.181E-06 |
| 6813 | S8B_A  | G13B_W | L11B_A | G1B_A  | 2.2E-06 | 4.0E-06 | 3.040E-06 | 4.903E-07 |
| 6814 | Y10B_A | V7B_A  | F3B_A  | E12B_A | 2.0E-06 | 4.2E-06 | 3.045E-06 | 6.134E-07 |
| 6815 | G13B_A | T4B_A  | E12B_A | G1B_A  | 2.0E-06 | 4.2E-06 | 3.045E-06 | 5.790E-07 |
| 6816 | Y10B_A | D6B_A  | S5B_A  | L23B_R | 1.8E-06 | 4.6E-06 | 3.050E-06 | 7.480E-07 |
| 6817 | G13B_A | S8B_A  | A16B_N | F19B_W | 1.0E-06 | 6.9E-06 | 3.050E-06 | 1.574E-06 |
| 6818 | S8B_A  | G13B_W | V7B_A  | E18B_A | 2.2E-06 | 4.5E-06 | 3.050E-06 | 7.164E-07 |
| 6819 | G13B_A | K17B_A | T4B_A  | V24B_N | 1.7E-06 | 4.8E-06 | 3.050E-06 | 8.482E-07 |
| 6820 | Y10B_A | V7B_A  | A16B_N | F19B_W | 6.5E-07 | 5.3E-06 | 3.052E-06 | 1.076E-06 |
| 6821 | Y10B_A | G13B_W | A16B_N | G1B_A  | 7.9E-07 | 5.8E-06 | 3.053E-06 | 1.319E-06 |
| 6822 | G13B_A | A16B_N | E18B_T | S5B_A  | 5.7E-07 | 5.4E-06 | 3.054E-06 | 1.435E-06 |
| 6823 | Y10B_A | E18B_A | L23B_Q | T2B_A  | 1.5E-06 | 5.5E-06 | 3.055E-06 | 1.168E-06 |
| 6824 | G13B_A | E18B_A | T4B_A  | S9B_A  | 2.6E-06 | 4.4E-06 | 3.055E-06 | 4.915E-07 |
| 6825 | G13B_A | E18B_A | S9B_A  | T2B_A  | 2.0E-06 | 4.6E-06 | 3.055E-06 | 6.863E-07 |
| 6826 | Y10B_A | E18B_A | S5B_A  | L23B_Q | 1.6E-06 | 4.9E-06 | 3.055E-06 | 8.338E-07 |
| 6827 | Y10B_A | L11B_A | K17B_A | L23B_Q | 2.1E-06 | 4.9E-06 | 3.055E-06 | 8.382E-07 |
| 6828 | S8B_A  | D6B_A  | E18B_T | F19B_A | 1.6E-06 | 4.9E-06 | 3.055E-06 | 8.357E-07 |
| 6829 | G13B_A | A16B_N | G1B_R  | F19B_A | 8.5E-07 | 5.8E-06 | 3.058E-06 | 1.113E-06 |
| 6830 | Y10B_A | S8B_A  | L23B_Q | G1B_A  | 1.1E-06 | 6.0E-06 | 3.060E-06 | 1.282E-06 |
| 6831 | G13B_A | D6B_A  | S5B_A  | E12B_A | 1.5E-06 | 4.7E-06 | 3.060E-06 | 7.789E-07 |
| 6832 | Y10B_A | T4B_A  | L23B_R | F19B_A | 1.7E-06 | 5.3E-06 | 3.060E-06 | 8.641E-07 |
| 6833 | G13B_A | V7B_A  | E18B_T | Q14B_A | 1.7E-06 | 6.1E-06 | 3.060E-06 | 1.050E-06 |
| 6834 | Y10B_A | E18B_A | L23B_R | T2B_A  | 2.1E-06 | 5.5E-06 | 3.060E-06 | 8.325E-07 |
| 6835 | Y10B_A | L23B_R | T2B_A  | G1B_A  | 1.5E-06 | 5.1E-06 | 3.060E-06 | 8.917E-07 |
| 6836 | G13B_A | V7B_A  | L11B_A | F19B_A | 2.0E-06 | 6.2E-06 | 3.060E-06 | 9.746E-07 |
| 6837 | G13B_A | S5B_A  | K17B_S | Q14B_A | 1.9E-06 | 5.1E-06 | 3.065E-06 | 9.427E-07 |
| 6838 | G13B_A | V7B_A  | K17B_A | F19B_Q | 1.0E-06 | 5.9E-06 | 3.065E-06 | 1.259E-06 |
| 6839 | G13B_A | K17B_A | Q14B_A | V24B_N | 1.7E-06 | 4.3E-06 | 3.065E-06 | 7.307E-07 |
| 6840 | G13B_A | F3B_A  | F19B_W | T4B_A  | 1.2E-06 | 4.7E-06 | 3.065E-06 | 9.218E-07 |
| 6841 | S8B_A  | D6B_A  | G13B_W | F3B_A  | 2.2E-06 | 5.0E-06 | 3.065E-06 | 7.206E-07 |
| 6842 | Y10B_A | K17B_A | F19B_W | S9B_A  | 1.9E-06 | 4.4E-06 | 3.070E-06 | 6.944E-07 |
| 6843 | G13B_A | D6B_A  | S9B_A  | T2B_A  | 2.0E-06 | 3.8E-06 | 3.070E-06 | 5.868E-07 |
| 6844 | Y10B_A | V7B_A  | F19B_Q | Q14B_A | 1.3E-06 | 5.8E-06 | 3.070E-06 | 1.167E-06 |
| 6845 | S8B_A  | G13B_W | E18B_T | K17B_A | 2.0E-06 | 4.6E-06 | 3.070E-06 | 8.399E-07 |
| 6846 | Y10B_A | K17B_A | F19B_A | V24B_T | 1.8E-06 | 4.9E-06 | 3.070E-06 | 7.935E-07 |
| 6847 | S8B_A  | D6B_A  | K17B_A | V24B_Q | 1.2E-06 | 4.0E-06 | 3.070E-06 | 7.299E-07 |
| 6848 | Y10B_A | D6B_A  | G1B_R  | E12B_A | 2.1E-06 | 4.2E-06 | 3.070E-06 | 5.090E-07 |
| 6849 | Y10B_A | V7B_A  | E18B_A | F19B_W | 1.5E-06 | 5.0E-06 | 3.075E-06 | 8.896E-07 |
| 6850 | S8B_A  | D6B_A  | G13B_W | L11B_A | 1.8E-06 | 4.8E-06 | 3.075E-06 | 7.166E-07 |
| 6851 | G13B_A | S8B_A  | K17B_A | L23B_Q | 1.8E-06 | 5.1E-06 | 3.075E-06 | 8.914E-07 |
| 6852 | G13B_A | Y10B_A | L11B_A | E12B_A | 2.0E-06 | 5.7E-06 | 3.075E-06 | 7.601E-07 |
| 6853 | Y10B_A | V7B_A  | T4B_A  | K17B_S | 2.2E-06 | 4.3E-06 | 3.075E-06 | 5.857E-07 |
| 6854 | Y10B_A | T4B_A  | V24B_Q | T2B_A  | 2.0E-06 | 4.3E-06 | 3.075E-06 | 6.727E-07 |
| 6855 | S8B_A  | G13B_W | V7B_A  | A16B_N | 5.3E-07 | 4.4E-06 | 3.077E-06 | 1.005E-06 |
| 6856 | Y10B_A | G1B_R  | T4B_A  | K17B_S | 1.7E-06 | 5.0E-06 | 3.080E-06 | 8.307E-07 |
| 6857 | G13B_A | S5B_A  | F19B_Q | Q14B_A | 1.7E-06 | 5.0E-06 | 3.080E-06 | 9.390E-07 |
| 6858 | G13B_A | V7B_A  | L11B_A | G1B_R  | 1.7E-06 | 4.3E-06 | 3.080E-06 | 6.110E-07 |
| 6859 | G13B_A | F3B_A  | A16B_N | F19B_A | 1.3E-06 | 4.8E-06 | 3.080E-06 | 1.083E-06 |
| 6860 | G13B_A | Y10B_A | F3B_A  | F19B_W | 2.0E-06 | 4.5E-06 | 3.080E-06 | 6.092E-07 |
| 6861 | G13B_A | V24B_T | Q14B_A | T2B_A  | 1.5E-06 | 5.6E-06 | 3.084E-06 | 9.895E-07 |
| 6862 | G13B_A | S8B_A  | E18B_A | S9B_A  | 2.1E-06 | 4.2E-06 | 3.085E-06 | 5.659E-07 |
| 6863 | Y10B_A | V7B_A  | F3B_A  | F19B_W | 1.9E-06 | 4.5E-06 | 3.085E-06 | 7.184E-07 |

|      |        |        |        |        |         |         |           |           |
|------|--------|--------|--------|--------|---------|---------|-----------|-----------|
| 6864 | G13B_A | Y10B_A | F19B_A | E12B_A | 1.7E-06 | 4.9E-06 | 3.085E-06 | 8.641E-07 |
| 6865 | Y10B_A | F3B_A  | E18B_A | K17B_S | 1.6E-06 | 5.1E-06 | 3.085E-06 | 1.014E-06 |
| 6866 | S8B_A  | V7B_A  | A16B_N | S9B_A  | 6.4E-07 | 6.2E-06 | 3.087E-06 | 1.530E-06 |
| 6867 | G13B_A | V7B_A  | Q14B_A | E12B_A | 2.0E-06 | 6.0E-06 | 3.090E-06 | 8.669E-07 |
| 6868 | S8B_A  | G13B_W | K17B_A | F19B_W | 1.4E-06 | 4.7E-06 | 3.090E-06 | 8.996E-07 |
| 6869 | Y10B_A | F3B_A  | E12B_A | G1B_A  | 1.7E-06 | 4.4E-06 | 3.090E-06 | 6.719E-07 |
| 6870 | G13B_A | Y10B_A | F19B_Q | Q14B_A | 1.4E-06 | 5.6E-06 | 3.090E-06 | 1.216E-06 |
| 6871 | S8B_A  | V7B_A  | F3B_A  | E12B_A | 1.6E-06 | 6.0E-06 | 3.090E-06 | 1.037E-06 |
| 6872 | Y10B_A | L11B_A | F19B_A | E12B_A | 1.9E-06 | 4.7E-06 | 3.090E-06 | 8.602E-07 |
| 6873 | G13B_A | T2B_A  | E12B_A | G1B_A  | 2.3E-06 | 5.7E-06 | 3.095E-06 | 7.149E-07 |
| 6874 | G13B_A | S8B_A  | E18B_T | G1B_A  | 1.8E-06 | 5.3E-06 | 3.095E-06 | 9.838E-07 |
| 6875 | Y10B_A | D6B_A  | E18B_T | F19B_A | 2.1E-06 | 4.4E-06 | 3.095E-06 | 7.416E-07 |
| 6876 | S8B_A  | G13B_W | F3B_A  | E18B_A | 1.9E-06 | 6.9E-06 | 3.095E-06 | 1.125E-06 |
| 6877 | G13B_A | Y10B_A | F19B_W | G1B_A  | 1.4E-06 | 5.2E-06 | 3.095E-06 | 1.051E-06 |
| 6878 | G13B_A | V7B_A  | A16B_N | G1B_R  | 8.1E-07 | 6.1E-06 | 3.099E-06 | 1.447E-06 |
| 6879 | Y10B_A | K17B_A | V24B_N | G1B_A  | 2.0E-06 | 4.3E-06 | 3.100E-06 | 8.118E-07 |
| 6880 | Y10B_A | F3B_A  | S5B_A  | L23B_R | 1.7E-06 | 7.3E-06 | 3.100E-06 | 1.238E-06 |
| 6881 | Y10B_A | D6B_A  | G13B_W | V7B_A  | 2.0E-06 | 5.6E-06 | 3.100E-06 | 9.234E-07 |
| 6882 | G13B_A | D6B_A  | A16B_N | G1B_A  | 1.2E-06 | 5.4E-06 | 3.100E-06 | 1.278E-06 |
| 6883 | Y10B_A | E18B_A | T4B_A  | L23B_R | 1.8E-06 | 4.4E-06 | 3.100E-06 | 7.504E-07 |
| 6884 | Y10B_A | L11B_A | E18B_A | S9B_A  | 2.3E-06 | 4.6E-06 | 3.105E-06 | 6.278E-07 |
| 6885 | G13B_A | L11B_A | F19B_W | T4B_A  | 1.7E-06 | 4.5E-06 | 3.105E-06 | 7.273E-07 |
| 6886 | Y10B_A | S8B_A  | Q14B_A | V24B_N | 2.0E-06 | 4.6E-06 | 3.110E-06 | 6.965E-07 |
| 6887 | Y10B_A | V7B_A  | L11B_A | E12B_A | 1.9E-06 | 4.6E-06 | 3.110E-06 | 7.326E-07 |
| 6888 | G13B_A | S8B_A  | L11B_A | F19B_W | 1.5E-06 | 5.5E-06 | 3.110E-06 | 1.084E-06 |
| 6889 | Y10B_A | A16B_N | S9B_A  | F19B_A | 1.3E-06 | 6.2E-06 | 3.110E-06 | 1.444E-06 |
| 6890 | S8B_A  | D6B_A  | L11B_A | S9B_A  | 2.0E-06 | 4.9E-06 | 3.110E-06 | 9.142E-07 |
| 6891 | Y10B_A | F3B_A  | L11B_A | S9B_A  | 2.1E-06 | 4.6E-06 | 3.110E-06 | 7.461E-07 |
| 6892 | Y10B_A | A16B_N | F19B_W | G1B_A  | 1.2E-06 | 4.7E-06 | 3.110E-06 | 1.152E-06 |
| 6893 | Y10B_A | K17B_A | F19B_A | V24B_Q | 1.3E-06 | 6.0E-06 | 3.115E-06 | 1.149E-06 |
| 6894 | Y10B_A | S5B_A  | V24B_Q | Q14B_A | 1.7E-06 | 4.3E-06 | 3.115E-06 | 7.492E-07 |
| 6895 | Y10B_A | E18B_A | S5B_A  | L23B_R | 1.4E-06 | 4.9E-06 | 3.115E-06 | 8.635E-07 |
| 6896 | Y10B_A | G13B_W | A16B_N | F19B_A | 1.1E-06 | 5.2E-06 | 3.120E-06 | 1.155E-06 |
| 6897 | G13B_A | V7B_A  | F3B_A  | G1B_R  | 1.6E-06 | 5.1E-06 | 3.120E-06 | 9.440E-07 |
| 6898 | Y10B_A | E18B_T | G1B_R  | T2B_A  | 1.8E-06 | 4.5E-06 | 3.120E-06 | 6.802E-07 |
| 6899 | G13B_A | L11B_A | K17B_A | F19B_Q | 1.7E-06 | 5.0E-06 | 3.120E-06 | 9.956E-07 |
| 6900 | Y10B_A | L11B_A | T4B_A  | K17B_S | 1.8E-06 | 5.7E-06 | 3.120E-06 | 9.785E-07 |
| 6901 | Y10B_A | D6B_A  | G1B_R  | F19B_W | 1.7E-06 | 5.7E-06 | 3.120E-06 | 8.794E-07 |
| 6902 | Y10B_A | F3B_A  | K17B_S | Q14B_A | 1.7E-06 | 5.1E-06 | 3.120E-06 | 7.696E-07 |
| 6903 | Y10B_A | L11B_A | S9B_A  | G1B_A  | 1.8E-06 | 4.1E-06 | 3.120E-06 | 6.526E-07 |
| 6904 | Y10B_A | G1B_R  | S5B_A  | K17B_S | 1.4E-06 | 4.6E-06 | 3.120E-06 | 8.464E-07 |
| 6905 | Y10B_A | E18B_T | Q14B_A | G1B_A  | 2.1E-06 | 4.6E-06 | 3.120E-06 | 6.940E-07 |
| 6906 | Y10B_A | L11B_A | E18B_A | F19B_W | 1.4E-06 | 5.3E-06 | 3.120E-06 | 8.758E-07 |
| 6907 | Y10B_A | G1B_R  | K17B_A | L23B_Q | 1.5E-06 | 4.7E-06 | 3.125E-06 | 7.369E-07 |
| 6908 | Y10B_A | A16B_N | K17B_S | F19B_A | 5.6E-07 | 7.5E-06 | 3.128E-06 | 1.783E-06 |
| 6909 | G13B_A | V7B_A  | T2B_A  | E12B_A | 1.6E-06 | 4.6E-06 | 3.130E-06 | 8.548E-07 |
| 6910 | G13B_A | V7B_A  | G1B_R  | F19B_A | 1.5E-06 | 4.2E-06 | 3.130E-06 | 7.042E-07 |
| 6911 | G13B_A | S8B_A  | F19B_A | E12B_A | 2.2E-06 | 5.5E-06 | 3.130E-06 | 7.814E-07 |
| 6912 | G13B_A | L11B_A | T4B_A  | E12B_A | 1.9E-06 | 5.8E-06 | 3.130E-06 | 8.791E-07 |
| 6913 | G13B_A | S8B_A  | V7B_A  | F19B_W | 1.2E-06 | 5.7E-06 | 3.130E-06 | 1.078E-06 |
| 6914 | G13B_A | Y10B_A | D6B_A  | F19B_W | 1.3E-06 | 5.9E-06 | 3.135E-06 | 1.065E-06 |
| 6915 | Y10B_A | L11B_A | F19B_W | G1B_A  | 1.2E-06 | 5.5E-06 | 3.135E-06 | 1.113E-06 |

|      |        |        |        |        |         |         |           |           |
|------|--------|--------|--------|--------|---------|---------|-----------|-----------|
| 6916 | Y10B_A | D6B_A  | F3B_A  | K17B_S | 1.2E-06 | 5.1E-06 | 3.140E-06 | 8.864E-07 |
| 6917 | G13B_A | E18B_T | K17B_A | F19B_A | 2.1E-06 | 4.8E-06 | 3.140E-06 | 6.747E-07 |
| 6918 | G13B_A | Y10B_A | T4B_A  | V24B_Q | 1.7E-06 | 5.0E-06 | 3.140E-06 | 8.114E-07 |
| 6919 | Y10B_A | A16B_N | L11B_A | E12B_A | 8.1E-07 | 5.7E-06 | 3.141E-06 | 1.296E-06 |
| 6920 | G13B_A | D6B_A  | A16B_N | L11B_A | 5.5E-07 | 5.6E-06 | 3.142E-06 | 1.088E-06 |
| 6921 | Y10B_A | S8B_A  | L23B_R | G1B_A  | 1.6E-06 | 4.6E-06 | 3.145E-06 | 8.507E-07 |
| 6922 | G13B_A | K17B_A | L23B_R | Q14B_A | 1.8E-06 | 6.0E-06 | 3.145E-06 | 1.020E-06 |
| 6923 | G13B_A | G1B_R  | T2B_A  | E12B_A | 2.1E-06 | 4.8E-06 | 3.145E-06 | 7.543E-07 |
| 6924 | G13B_A | V7B_A  | S5B_A  | E12B_A | 2.2E-06 | 4.9E-06 | 3.150E-06 | 6.802E-07 |
| 6925 | S8B_A  | G13B_W | A16B_N | F19B_A | 7.1E-07 | 6.5E-06 | 3.150E-06 | 1.266E-06 |
| 6926 | G13B_A | S8B_A  | E18B_T | F19B_A | 1.8E-06 | 5.7E-06 | 3.150E-06 | 1.015E-06 |
| 6927 | G13B_A | Y10B_A | D6B_A  | E12B_A | 2.1E-06 | 5.5E-06 | 3.150E-06 | 7.200E-07 |
| 6928 | Y10B_A | S5B_A  | T4B_A  | V24B_Q | 1.7E-06 | 4.6E-06 | 3.150E-06 | 7.008E-07 |
| 6929 | Y10B_A | G1B_R  | K17B_A | L23B_R | 2.0E-06 | 4.6E-06 | 3.150E-06 | 7.473E-07 |
| 6930 | Y10B_A | V7B_A  | V24B_T | T2B_A  | 2.1E-06 | 4.1E-06 | 3.150E-06 | 5.717E-07 |
| 6931 | Y10B_A | D6B_A  | K17B_A | V24B_Q | 1.6E-06 | 6.0E-06 | 3.155E-06 | 1.015E-06 |
| 6932 | S8B_A  | D6B_A  | F3B_A  | F19B_W | 1.5E-06 | 5.2E-06 | 3.155E-06 | 7.265E-07 |
| 6933 | Y10B_A | F3B_A  | E18B_T | F19B_A | 1.8E-06 | 5.2E-06 | 3.155E-06 | 8.757E-07 |
| 6934 | Y10B_A | D6B_A  | G13B_W | G1B_R  | 1.8E-06 | 5.5E-06 | 3.155E-06 | 7.897E-07 |
| 6935 | G13B_A | S5B_A  | F19B_A | E12B_A | 1.8E-06 | 5.8E-06 | 3.155E-06 | 1.143E-06 |
| 6936 | Y10B_A | A16B_N | E18B_A | S9B_A  | 1.4E-06 | 4.6E-06 | 3.160E-06 | 1.028E-06 |
| 6937 | G13B_A | F3B_A  | Q14B_A | E12B_A | 2.0E-06 | 6.0E-06 | 3.160E-06 | 9.827E-07 |
| 6938 | G13B_A | F3B_A  | L11B_A | G1B_A  | 2.1E-06 | 5.2E-06 | 3.160E-06 | 8.363E-07 |
| 6939 | G13B_A | S8B_A  | F19B_W | G1B_A  | 1.6E-06 | 5.7E-06 | 3.160E-06 | 1.175E-06 |
| 6940 | G13B_A | Y10B_A | K17B_A | L23B_Q | 2.1E-06 | 4.9E-06 | 3.160E-06 | 8.068E-07 |
| 6941 | G13B_A | F3B_A  | A16B_N | G1B_R  | 7.7E-07 | 7.1E-06 | 3.160E-06 | 1.754E-06 |
| 6942 | Y10B_A | D6B_A  | V7B_A  | S9B_A  | 1.9E-06 | 4.9E-06 | 3.165E-06 | 9.178E-07 |
| 6943 | G13B_A | Y10B_A | F19B_Q | T2B_A  | 1.3E-06 | 5.6E-06 | 3.170E-06 | 1.185E-06 |
| 6944 | Y10B_A | L11B_A | K17B_A | F19B_Q | 1.1E-06 | 5.1E-06 | 3.170E-06 | 1.072E-06 |
| 6945 | G13B_A | D6B_A  | E18B_T | T2B_A  | 1.7E-06 | 5.4E-06 | 3.170E-06 | 1.126E-06 |
| 6946 | G13B_A | F3B_A  | G1B_R  | F19B_A | 1.8E-06 | 5.2E-06 | 3.170E-06 | 8.529E-07 |
| 6947 | Y10B_A | L11B_A | F19B_Q | T2B_A  | 1.3E-06 | 6.5E-06 | 3.170E-06 | 1.235E-06 |
| 6948 | Y10B_A | A16B_N | F19B_A | E12B_A | 1.1E-06 | 5.5E-06 | 3.170E-06 | 1.156E-06 |
| 6949 | Y10B_A | D6B_A  | L23B_R | T2B_A  | 2.1E-06 | 6.1E-06 | 3.175E-06 | 9.250E-07 |
| 6950 | Y10B_A | F19B_Q | T2B_A  | G1B_A  | 1.3E-06 | 6.6E-06 | 3.175E-06 | 1.549E-06 |
| 6951 | Y10B_A | D6B_A  | G13B_W | F19B_A | 2.2E-06 | 5.0E-06 | 3.175E-06 | 7.759E-07 |
| 6952 | Y10B_A | F3B_A  | S5B_A  | F19B_Q | 1.5E-06 | 5.2E-06 | 3.175E-06 | 1.005E-06 |
| 6953 | Y10B_A | D6B_A  | S9B_A  | F19B_A | 2.0E-06 | 5.5E-06 | 3.175E-06 | 8.867E-07 |
| 6954 | G13B_A | S8B_A  | D6B_A  | S9B_A  | 1.9E-06 | 5.1E-06 | 3.175E-06 | 8.277E-07 |
| 6955 | Y10B_A | A16B_N | T4B_A  | L23B_Q | 7.7E-07 | 5.2E-06 | 3.179E-06 | 1.070E-06 |
| 6956 | Y10B_A | D6B_A  | A16B_N | F19B_W | 7.9E-07 | 6.5E-06 | 3.180E-06 | 1.353E-06 |
| 6957 | Y10B_A | E18B_A | V24B_T | Q14B_A | 2.2E-06 | 5.4E-06 | 3.180E-06 | 7.911E-07 |
| 6958 | Y10B_A | D6B_A  | F19B_A | E12B_A | 1.6E-06 | 5.3E-06 | 3.180E-06 | 8.514E-07 |
| 6959 | G13B_A | V7B_A  | A16B_N | L11B_A | 7.0E-07 | 5.5E-06 | 3.180E-06 | 1.157E-06 |
| 6960 | G13B_A | G1B_R  | F19B_W | T2B_A  | 1.6E-06 | 4.4E-06 | 3.180E-06 | 7.804E-07 |
| 6961 | Y10B_A | G1B_R  | K17B_S | T2B_A  | 2.0E-06 | 4.1E-06 | 3.180E-06 | 6.725E-07 |
| 6962 | Y10B_A | V7B_A  | A16B_N | S9B_A  | 1.0E-06 | 6.0E-06 | 3.185E-06 | 1.201E-06 |
| 6963 | G13B_A | Y10B_A | S8B_A  | K17B_S | 1.9E-06 | 6.0E-06 | 3.185E-06 | 1.053E-06 |
| 6964 | Y10B_A | D6B_A  | L11B_A | E12B_A | 2.1E-06 | 4.7E-06 | 3.185E-06 | 6.442E-07 |
| 6965 | Y10B_A | F3B_A  | E18B_A | E12B_A | 2.0E-06 | 4.2E-06 | 3.185E-06 | 6.089E-07 |
| 6966 | G13B_A | L11B_A | G1B_R  | F19B_A | 1.9E-06 | 4.9E-06 | 3.185E-06 | 7.896E-07 |
| 6967 | Y10B_A | F19B_W | T2B_A  | E12B_A | 2.0E-06 | 5.4E-06 | 3.190E-06 | 9.458E-07 |

|      |        |        |        |        |         |         |           |           |
|------|--------|--------|--------|--------|---------|---------|-----------|-----------|
| 6968 | Y10B_A | L11B_A | S9B_A  | F19B_A | 2.0E-06 | 4.6E-06 | 3.190E-06 | 8.149E-07 |
| 6969 | G13B_A | S5B_A  | K17B_A | V24B_N | 2.0E-06 | 4.6E-06 | 3.190E-06 | 7.297E-07 |
| 6970 | Y10B_A | F3B_A  | K17B_S | T2B_A  | 1.8E-06 | 5.7E-06 | 3.190E-06 | 1.051E-06 |
| 6971 | S8B_A  | G13B_W | F3B_A  | A16B_N | 5.0E-07 | 7.1E-06 | 3.194E-06 | 1.327E-06 |
| 6972 | Y10B_A | G13B_W | K17B_A | F19B_W | 2.0E-06 | 5.0E-06 | 3.195E-06 | 7.857E-07 |
| 6973 | Y10B_A | D6B_A  | G13B_W | E18B_A | 1.3E-06 | 4.6E-06 | 3.195E-06 | 7.508E-07 |
| 6974 | Y10B_A | D6B_A  | F3B_A  | E12B_A | 2.2E-06 | 4.7E-06 | 3.195E-06 | 5.568E-07 |
| 6975 | Y10B_A | D6B_A  | V7B_A  | E12B_A | 2.5E-06 | 4.0E-06 | 3.195E-06 | 4.310E-07 |
| 6976 | G13B_A | V7B_A  | E18B_A | G1B_R  | 1.3E-06 | 4.7E-06 | 3.195E-06 | 8.306E-07 |
| 6977 | G13B_A | A16B_N | F19B_W | Q14B_A | 6.3E-07 | 5.4E-06 | 3.197E-06 | 1.374E-06 |
| 6978 | S8B_A  | G13B_W | V7B_A  | S5B_A  | 2.2E-06 | 5.0E-06 | 3.200E-06 | 7.218E-07 |
| 6979 | Y10B_A | L11B_A | E12B_A | G1B_A  | 2.3E-06 | 5.4E-06 | 3.200E-06 | 7.616E-07 |
| 6980 | G13B_A | V7B_A  | T4B_A  | E12B_A | 1.9E-06 | 5.4E-06 | 3.200E-06 | 7.967E-07 |
| 6981 | S8B_A  | D6B_A  | L11B_A | F19B_W | 1.6E-06 | 6.9E-06 | 3.205E-06 | 1.470E-06 |
| 6982 | Y10B_A | E18B_A | G1B_R  | F19B_W | 1.8E-06 | 5.5E-06 | 3.210E-06 | 1.038E-06 |
| 6983 | S8B_A  | D6B_A  | G13B_W | V7B_A  | 1.7E-06 | 4.3E-06 | 3.210E-06 | 7.752E-07 |
| 6984 | G13B_A | Y10B_A | V7B_A  | E12B_A | 1.9E-06 | 5.4E-06 | 3.210E-06 | 9.508E-07 |
| 6985 | Y10B_A | E18B_A | G1B_R  | E12B_A | 2.3E-06 | 6.3E-06 | 3.210E-06 | 9.662E-07 |
| 6986 | G13B_A | A16B_N | S5B_A  | F19B_W | 7.3E-07 | 5.2E-06 | 3.211E-06 | 1.261E-06 |
| 6987 | Y10B_A | A16B_N | S9B_A  | G1B_A  | 2.3E-06 | 5.6E-06 | 3.215E-06 | 7.909E-07 |
| 6988 | G13B_A | F19B_Q | Q14B_A | T2B_A  | 1.8E-06 | 8.1E-06 | 3.220E-06 | 1.517E-06 |
| 6989 | S8B_A  | D6B_A  | F19B_A | E12B_A | 2.4E-06 | 6.1E-06 | 3.220E-06 | 8.727E-07 |
| 6990 | Y10B_A | V7B_A  | F19B_Q | T2B_A  | 1.5E-06 | 5.9E-06 | 3.220E-06 | 1.192E-06 |
| 6991 | Y10B_A | S8B_A  | T4B_A  | V24B_N | 1.9E-06 | 4.3E-06 | 3.220E-06 | 7.682E-07 |
| 6992 | Y10B_A | F3B_A  | E18B_T | G1B_A  | 2.1E-06 | 5.0E-06 | 3.220E-06 | 8.936E-07 |
| 6993 | G13B_A | D6B_A  | F3B_A  | G1B_A  | 2.1E-06 | 4.3E-06 | 3.225E-06 | 7.033E-07 |
| 6994 | Y10B_A | G1B_R  | T4B_A  | F19B_Q | 1.2E-06 | 6.4E-06 | 3.225E-06 | 1.373E-06 |
| 6995 | S8B_A  | D6B_A  | E18B_T | G1B_R  | 1.8E-06 | 5.0E-06 | 3.225E-06 | 9.894E-07 |
| 6996 | Y10B_A | K17B_A | L23B_Q | F19B_A | 2.0E-06 | 6.7E-06 | 3.225E-06 | 1.196E-06 |
| 6997 | Y10B_A | A16B_N | E18B_A | F19B_W | 4.9E-07 | 6.6E-06 | 3.228E-06 | 1.849E-06 |
| 6998 | Y10B_A | V7B_A  | K17B_A | V24B_T | 1.7E-06 | 4.7E-06 | 3.230E-06 | 7.685E-07 |
| 6999 | G13B_A | Y10B_A | S5B_A  | F19B_Q | 2.0E-06 | 5.0E-06 | 3.230E-06 | 9.314E-07 |
| 7000 | G13B_A | S8B_A  | E12B_A | G1B_A  | 2.0E-06 | 6.3E-06 | 3.230E-06 | 1.097E-06 |
| 7001 | G13B_A | L11B_A | Q14B_A | E12B_A | 1.7E-06 | 5.4E-06 | 3.230E-06 | 9.995E-07 |
| 7002 | G13B_A | E18B_A | S9B_A  | Q14B_A | 2.7E-06 | 4.4E-06 | 3.230E-06 | 5.648E-07 |
| 7003 | G13B_A | F3B_A  | A16B_N | E18B_A | 9.3E-07 | 5.6E-06 | 3.233E-06 | 1.425E-06 |
| 7004 | S8B_A  | D6B_A  | F19B_Q | Q14B_A | 9.3E-07 | 5.6E-06 | 3.236E-06 | 1.336E-06 |
| 7005 | Y10B_A | F3B_A  | K17B_A | V24B_Q | 2.0E-06 | 5.3E-06 | 3.240E-06 | 9.098E-07 |
| 7006 | Y10B_A | E18B_A | L23B_Q | Q14B_A | 2.0E-06 | 4.7E-06 | 3.240E-06 | 7.387E-07 |
| 7007 | G13B_A | D6B_A  | V7B_A  | G1B_A  | 2.1E-06 | 5.0E-06 | 3.240E-06 | 7.185E-07 |
| 7008 | S8B_A  | D6B_A  | V24B_Q | T2B_A  | 1.6E-06 | 5.7E-06 | 3.240E-06 | 1.068E-06 |
| 7009 | S8B_A  | D6B_A  | A16B_N | S9B_A  | 5.5E-07 | 5.4E-06 | 3.242E-06 | 1.253E-06 |
| 7010 | G13B_A | L11B_A | E18B_A | G1B_A  | 2.2E-06 | 4.8E-06 | 3.245E-06 | 7.294E-07 |
| 7011 | G13B_A | D6B_A  | K17B_A | F19B_Q | 1.2E-06 | 7.0E-06 | 3.245E-06 | 1.569E-06 |
| 7012 | Y10B_A | F19B_A | E12B_A | G1B_A  | 2.3E-06 | 4.9E-06 | 3.245E-06 | 7.681E-07 |
| 7013 | G13B_A | S5B_A  | E12B_A | G1B_A  | 2.3E-06 | 6.0E-06 | 3.245E-06 | 9.997E-07 |
| 7014 | Y10B_A | F3B_A  | K17B_A | V24B_N | 2.0E-06 | 5.4E-06 | 3.250E-06 | 1.009E-06 |
| 7015 | Y10B_A | K17B_S | T2B_A  | G1B_A  | 1.3E-06 | 5.1E-06 | 3.250E-06 | 8.507E-07 |
| 7016 | S8B_A  | V7B_A  | F3B_A  | F19B_W | 1.6E-06 | 6.3E-06 | 3.250E-06 | 1.319E-06 |
| 7017 | G13B_A | S8B_A  | T4B_A  | K17B_S | 1.6E-06 | 5.1E-06 | 3.255E-06 | 8.988E-07 |
| 7018 | Y10B_A | K17B_A | S9B_A  | E12B_A | 2.5E-06 | 5.0E-06 | 3.255E-06 | 5.753E-07 |
| 7019 | G13B_A | S8B_A  | K17B_S | T2B_A  | 1.6E-06 | 5.3E-06 | 3.255E-06 | 1.094E-06 |



|      |        |        |        |        |         |         |           |           |
|------|--------|--------|--------|--------|---------|---------|-----------|-----------|
| 7020 | S8B_A  | D6B_A  | F19B_Q | T2B_A  | 1.1E-06 | 6.6E-06 | 3.255E-06 | 1.263E-06 |
| 7021 | Y10B_A | A16B_N | S5B_A  | L23B_R | 1.0E-06 | 8.1E-06 | 3.255E-06 | 1.698E-06 |
| 7022 | Y10B_A | L11B_A | K17B_A | V24B_N | 2.0E-06 | 6.3E-06 | 3.255E-06 | 1.119E-06 |
| 7023 | G13B_A | T4B_A  | K17B_S | F19B_A | 1.2E-06 | 7.8E-06 | 3.260E-06 | 1.691E-06 |
| 7024 | Y10B_A | G13B_W | V7B_A  | E18B_A | 1.9E-06 | 4.5E-06 | 3.260E-06 | 7.214E-07 |
| 7025 | G13B_A | E18B_T | F19B_A | T2B_A  | 2.0E-06 | 5.4E-06 | 3.260E-06 | 1.078E-06 |
| 7026 | Y10B_A | V7B_A  | K17B_S | Q14B_A | 2.1E-06 | 4.2E-06 | 3.260E-06 | 6.244E-07 |
| 7027 | G13B_A | S5B_A  | K17B_A | V24B_Q | 1.7E-06 | 6.6E-06 | 3.260E-06 | 1.159E-06 |
| 7028 | G13B_A | Y10B_A | E18B_A | F19B_W | 1.3E-06 | 4.6E-06 | 3.260E-06 | 9.383E-07 |
| 7029 | G13B_A | S8B_A  | K17B_A | L23B_R | 1.6E-06 | 4.8E-06 | 3.260E-06 | 8.133E-07 |
| 7030 | S8B_A  | D6B_A  | L11B_A | K17B_S | 2.1E-06 | 4.7E-06 | 3.265E-06 | 6.580E-07 |
| 7031 | G13B_A | V7B_A  | E18B_A | F19B_A | 2.2E-06 | 4.6E-06 | 3.265E-06 | 7.132E-07 |
| 7032 | Y10B_A | S5B_A  | T4B_A  | V24B_T | 2.0E-06 | 4.6E-06 | 3.270E-06 | 5.741E-07 |
| 7033 | G13B_A | V7B_A  | F3B_A  | F19B_A | 1.9E-06 | 5.0E-06 | 3.270E-06 | 8.682E-07 |
| 7034 | G13B_A | S8B_A  | E18B_A | F19B_W | 1.7E-06 | 5.4E-06 | 3.270E-06 | 9.319E-07 |
| 7035 | Y10B_A | D6B_A  | E18B_A | S9B_A  | 2.6E-06 | 4.7E-06 | 3.270E-06 | 6.088E-07 |
| 7036 | G13B_A | D6B_A  | V7B_A  | G1B_R  | 2.5E-06 | 4.9E-06 | 3.270E-06 | 6.258E-07 |
| 7037 | Y10B_A | E18B_A | F19B_Q | T2B_A  | 1.5E-06 | 6.2E-06 | 3.275E-06 | 1.166E-06 |
| 7038 | Y10B_A | F3B_A  | G1B_R  | E12B_A | 2.1E-06 | 6.6E-06 | 3.275E-06 | 1.088E-06 |
| 7039 | Y10B_A | E18B_A | K17B_A | V24B_N | 1.8E-06 | 5.8E-06 | 3.275E-06 | 9.363E-07 |
| 7040 | G13B_A | A16B_N | E18B_A | G1B_R  | 4.3E-07 | 5.8E-06 | 3.275E-06 | 1.339E-06 |
| 7041 | Y10B_A | A16B_N | F19B_Q | T2B_A  | 1.5E-06 | 5.3E-06 | 3.275E-06 | 1.014E-06 |
| 7042 | G13B_A | F3B_A  | F19B_W | T2B_A  | 2.3E-06 | 4.7E-06 | 3.275E-06 | 6.820E-07 |
| 7043 | G13B_A | V7B_A  | F3B_A  | L11B_A | 2.1E-06 | 4.0E-06 | 3.280E-06 | 6.014E-07 |
| 7044 | Y10B_A | E18B_A | S9B_A  | G1B_A  | 2.7E-06 | 4.9E-06 | 3.280E-06 | 5.569E-07 |
| 7045 | Y10B_A | E18B_T | K17B_A | S9B_A  | 2.2E-06 | 4.9E-06 | 3.285E-06 | 8.356E-07 |
| 7046 | G13B_A | L11B_A | F19B_W | T2B_A  | 1.8E-06 | 7.6E-06 | 3.285E-06 | 1.406E-06 |
| 7047 | S8B_A  | D6B_A  | E18B_A | S9B_A  | 2.1E-06 | 5.0E-06 | 3.290E-06 | 7.305E-07 |
| 7048 | Y10B_A | D6B_A  | F19B_Q | T2B_A  | 1.2E-06 | 7.0E-06 | 3.290E-06 | 1.495E-06 |
| 7049 | G13B_A | F3B_A  | K17B_A | S9B_A  | 9.8E-07 | 4.8E-06 | 3.294E-06 | 9.685E-07 |
| 7050 | G13B_A | V7B_A  | L11B_A | E18B_A | 2.2E-06 | 5.0E-06 | 3.295E-06 | 8.192E-07 |
| 7051 | G13B_A | L11B_A | S5B_A  | F19B_W | 1.4E-06 | 5.8E-06 | 3.295E-06 | 1.097E-06 |
| 7052 | G13B_A | E18B_T | K17B_A | G1B_A  | 1.7E-06 | 6.6E-06 | 3.295E-06 | 1.083E-06 |
| 7053 | Y10B_A | S5B_A  | V24B_T | T2B_A  | 2.4E-06 | 6.0E-06 | 3.295E-06 | 7.373E-07 |
| 7054 | G13B_A | V7B_A  | S5B_A  | F19B_W | 1.7E-06 | 4.9E-06 | 3.295E-06 | 8.924E-07 |
| 7055 | G13B_A | D6B_A  | T4B_A  | E12B_A | 2.1E-06 | 4.7E-06 | 3.295E-06 | 6.732E-07 |
| 7056 | Y10B_A | E18B_T | F19B_A | Q14B_A | 2.1E-06 | 5.4E-06 | 3.300E-06 | 9.749E-07 |
| 7057 | S8B_A  | D6B_A  | K17B_A | V24B_N | 2.1E-06 | 4.9E-06 | 3.300E-06 | 9.442E-07 |
| 7058 | G13B_A | E18B_A | Q14B_A | E12B_A | 2.5E-06 | 5.5E-06 | 3.300E-06 | 7.698E-07 |
| 7059 | S8B_A  | D6B_A  | G1B_R  | E12B_A | 1.6E-06 | 5.1E-06 | 3.300E-06 | 9.630E-07 |
| 7060 | Y10B_A | D6B_A  | A16B_N | F19B_Q | 1.0E-06 | 7.4E-06 | 3.300E-06 | 1.421E-06 |
| 7061 | Y10B_A | S8B_A  | G13B_W | F3B_A  | 1.6E-06 | 4.5E-06 | 3.300E-06 | 6.391E-07 |
| 7062 | G13B_A | K17B_A | L23B_Q | Q14B_A | 2.1E-06 | 4.7E-06 | 3.300E-06 | 6.617E-07 |
| 7063 | Y10B_A | T4B_A  | L23B_Q | T2B_A  | 2.0E-06 | 4.5E-06 | 3.305E-06 | 7.466E-07 |
| 7064 | S8B_A  | D6B_A  | S5B_A  | F19B_Q | 1.3E-06 | 7.7E-06 | 3.305E-06 | 1.577E-06 |
| 7065 | Y10B_A | L11B_A | K17B_A | V24B_Q | 1.9E-06 | 5.8E-06 | 3.305E-06 | 1.010E-06 |
| 7066 | S8B_A  | D6B_A  | V7B_A  | E12B_A | 2.0E-06 | 4.7E-06 | 3.305E-06 | 7.178E-07 |
| 7067 | G13B_A | D6B_A  | F3B_A  | L11B_A | 1.9E-06 | 4.8E-06 | 3.305E-06 | 6.517E-07 |
| 7068 | G13B_A | S8B_A  | E18B_T | T2B_A  | 2.0E-06 | 4.8E-06 | 3.310E-06 | 8.723E-07 |
| 7069 | Y10B_A | F19B_W | T4B_A  | E12B_A | 1.4E-06 | 5.4E-06 | 3.310E-06 | 9.973E-07 |
| 7070 | Y10B_A | G1B_R  | F19B_Q | T2B_A  | 9.5E-07 | 7.5E-06 | 3.313E-06 | 1.607E-06 |
| 7071 | G13B_A | K17B_A | T2B_A  | V24B_N | 2.0E-06 | 5.1E-06 | 3.315E-06 | 7.842E-07 |

|      |        |        |        |        |         |         |           |           |
|------|--------|--------|--------|--------|---------|---------|-----------|-----------|
| 7072 | G13B_A | K17B_A | V24B_T | Q14B_A | 2.0E-06 | 5.3E-06 | 3.315E-06 | 8.641E-07 |
| 7073 | G13B_A | S5B_A  | F19B_Q | T2B_A  | 1.7E-06 | 6.5E-06 | 3.320E-06 | 1.406E-06 |
| 7074 | Y10B_A | E18B_A | S5B_A  | F19B_Q | 1.3E-06 | 5.4E-06 | 3.320E-06 | 1.016E-06 |
| 7075 | Y10B_A | L11B_A | E18B_A | E12B_A | 2.1E-06 | 5.3E-06 | 3.320E-06 | 9.260E-07 |
| 7076 | G13B_A | D6B_A  | F19B_A | G1B_A  | 2.5E-06 | 5.1E-06 | 3.320E-06 | 6.670E-07 |
| 7077 | G13B_A | F3B_A  | A16B_N | G1B_A  | 1.5E-06 | 4.7E-06 | 3.320E-06 | 9.243E-07 |
| 7078 | Y10B_A | E18B_A | K17B_S | T2B_A  | 2.3E-06 | 6.5E-06 | 3.325E-06 | 9.904E-07 |
| 7079 | G13B_A | D6B_A  | V7B_A  | F19B_A | 2.1E-06 | 5.3E-06 | 3.325E-06 | 9.147E-07 |
| 7080 | G13B_A | D6B_A  | G1B_R  | F19B_A | 1.8E-06 | 7.6E-06 | 3.325E-06 | 1.269E-06 |
| 7081 | Y10B_A | V7B_A  | S5B_A  | K17B_S | 1.8E-06 | 6.3E-06 | 3.325E-06 | 1.110E-06 |
| 7082 | Y10B_A | K17B_A | F19B_A | V24B_N | 1.9E-06 | 5.3E-06 | 3.325E-06 | 9.792E-07 |
| 7083 | Y10B_A | S8B_A  | S5B_A  | V24B_Q | 2.0E-06 | 5.1E-06 | 3.325E-06 | 9.014E-07 |
| 7084 | Y10B_A | V7B_A  | E18B_A | E12B_A | 2.1E-06 | 4.7E-06 | 3.325E-06 | 7.608E-07 |
| 7085 | Y10B_A | V7B_A  | E12B_A | G1B_A  | 2.3E-06 | 4.4E-06 | 3.325E-06 | 7.532E-07 |
| 7086 | G13B_A | Y10B_A | K17B_A | V24B_N | 2.0E-06 | 5.6E-06 | 3.330E-06 | 8.279E-07 |
| 7087 | G13B_A | Y10B_A | V7B_A  | F19B_W | 1.7E-06 | 6.5E-06 | 3.335E-06 | 1.082E-06 |
| 7088 | Y10B_A | S8B_A  | D6B_A  | F19B_Q | 1.8E-06 | 6.0E-06 | 3.335E-06 | 1.047E-06 |
| 7089 | Y10B_A | F3B_A  | E18B_T | T2B_A  | 2.0E-06 | 4.6E-06 | 3.335E-06 | 6.800E-07 |
| 7090 | G13B_A | D6B_A  | L11B_A | E18B_A | 2.0E-06 | 4.4E-06 | 3.340E-06 | 6.056E-07 |
| 7091 | Y10B_A | V7B_A  | L11B_A | F19B_W | 2.0E-06 | 5.2E-06 | 3.340E-06 | 8.049E-07 |
| 7092 | Y10B_A | D6B_A  | T4B_A  | L23B_R | 2.0E-06 | 6.0E-06 | 3.340E-06 | 1.035E-06 |
| 7093 | G13B_A | Y10B_A | K17B_A | V24B_T | 2.2E-06 | 5.1E-06 | 3.345E-06 | 7.273E-07 |
| 7094 | G13B_A | Y10B_A | E12B_A | G1B_A  | 2.0E-06 | 4.6E-06 | 3.345E-06 | 7.911E-07 |
| 7095 | S8B_A  | G13B_W | G1B_R  | S5B_A  | 1.7E-06 | 6.0E-06 | 3.345E-06 | 1.053E-06 |
| 7096 | Y10B_A | S8B_A  | S5B_A  | V24B_N | 1.9E-06 | 4.6E-06 | 3.345E-06 | 6.549E-07 |
| 7097 | Y10B_A | S5B_A  | F19B_Q | G1B_A  | 1.1E-06 | 8.8E-06 | 3.345E-06 | 1.835E-06 |
| 7098 | Y10B_A | E18B_A | S9B_A  | F19B_A | 2.2E-06 | 4.6E-06 | 3.345E-06 | 8.056E-07 |
| 7099 | Y10B_A | F3B_A  | E18B_A | F19B_W | 2.2E-06 | 5.0E-06 | 3.345E-06 | 8.876E-07 |
| 7100 | S8B_A  | D6B_A  | G13B_W | E18B_A | 1.9E-06 | 4.6E-06 | 3.350E-06 | 7.633E-07 |
| 7101 | Y10B_A | V7B_A  | K17B_A | L23B_Q | 1.4E-06 | 5.5E-06 | 3.350E-06 | 1.142E-06 |
| 7102 | G13B_A | Q14B_A | E12B_A | G1B_A  | 2.7E-06 | 6.0E-06 | 3.350E-06 | 8.108E-07 |
| 7103 | G13B_A | D6B_A  | S5B_A  | F19B_W | 1.7E-06 | 5.3E-06 | 3.350E-06 | 9.208E-07 |
| 7104 | G13B_A | V7B_A  | K17B_A | S9B_A  | 1.9E-06 | 5.7E-06 | 3.355E-06 | 8.413E-07 |
| 7105 | G13B_A | V7B_A  | F3B_A  | A16B_N | 1.2E-06 | 5.2E-06 | 3.355E-06 | 1.316E-06 |
| 7106 | Y10B_A | S8B_A  | G13B_W | G1B_R  | 1.3E-06 | 5.5E-06 | 3.355E-06 | 8.147E-07 |
| 7107 | Y10B_A | F3B_A  | K17B_A | L23B_Q | 1.7E-06 | 6.0E-06 | 3.355E-06 | 1.140E-06 |
| 7108 | G13B_A | V7B_A  | F19B_A | G1B_A  | 2.5E-06 | 4.1E-06 | 3.355E-06 | 4.979E-07 |
| 7109 | G13B_A | D6B_A  | F19B_W | T4B_A  | 2.1E-06 | 7.0E-06 | 3.360E-06 | 1.136E-06 |
| 7110 | Y10B_A | S5B_A  | F19B_Q | T2B_A  | 1.4E-06 | 5.6E-06 | 3.360E-06 | 1.275E-06 |
| 7111 | S8B_A  | D6B_A  | E18B_T | G1B_A  | 2.0E-06 | 5.7E-06 | 3.360E-06 | 1.117E-06 |
| 7112 | Y10B_A | S8B_A  | K17B_S | G1B_A  | 1.8E-06 | 5.4E-06 | 3.360E-06 | 1.117E-06 |
| 7113 | S8B_A  | G13B_W | V7B_A  | T2B_A  | 2.1E-06 | 5.0E-06 | 3.365E-06 | 7.849E-07 |
| 7114 | G13B_A | K17B_S | Q14B_A | T2B_A  | 2.2E-06 | 4.9E-06 | 3.365E-06 | 7.896E-07 |
| 7115 | G13B_A | S8B_A  | S5B_A  | K17B_S | 2.0E-06 | 5.1E-06 | 3.365E-06 | 8.969E-07 |
| 7116 | Y10B_A | T4B_A  | L23B_R | Q14B_A | 1.9E-06 | 4.8E-06 | 3.370E-06 | 7.658E-07 |
| 7117 | Y10B_A | F19B_Q | Q14B_A | G1B_A  | 1.7E-06 | 5.6E-06 | 3.370E-06 | 8.980E-07 |
| 7118 | Y10B_A | E18B_T | G1B_R  | S5B_A  | 1.9E-06 | 5.9E-06 | 3.370E-06 | 9.905E-07 |
| 7119 | Y10B_A | D6B_A  | S5B_A  | K17B_S | 1.6E-06 | 6.7E-06 | 3.370E-06 | 1.176E-06 |
| 7120 | Y10B_A | E18B_A | E12B_A | G1B_A  | 2.6E-06 | 4.5E-06 | 3.370E-06 | 4.879E-07 |
| 7121 | G13B_A | D6B_A  | F19B_W | T2B_A  | 1.6E-06 | 5.3E-06 | 3.370E-06 | 9.548E-07 |
| 7122 | Y10B_A | A16B_N | S5B_A  | F19B_W | 7.3E-07 | 6.5E-06 | 3.371E-06 | 1.544E-06 |
| 7123 | Y10B_A | A16B_N | S5B_A  | K17B_S | 9.5E-07 | 6.7E-06 | 3.373E-06 | 1.391E-06 |

|      |        |        |        |        |         |         |           |           |
|------|--------|--------|--------|--------|---------|---------|-----------|-----------|
| 7124 | G13B_A | S8B_A  | S9B_A  | F19B_A | 2.0E-06 | 7.7E-06 | 3.375E-06 | 1.417E-06 |
| 7125 | G13B_A | F3B_A  | T2B_A  | E12B_A | 2.0E-06 | 6.3E-06 | 3.375E-06 | 1.059E-06 |
| 7126 | Y10B_A | E18B_T | K17B_A | E12B_A | 2.1E-06 | 5.0E-06 | 3.375E-06 | 8.675E-07 |
| 7127 | G13B_A | S8B_A  | V7B_A  | E12B_A | 2.0E-06 | 4.9E-06 | 3.375E-06 | 8.207E-07 |
| 7128 | G13B_A | V7B_A  | L11B_A | G1B_A  | 2.0E-06 | 5.7E-06 | 3.375E-06 | 8.663E-07 |
| 7129 | Y10B_A | S5B_A  | T4B_A  | V24B_N | 2.0E-06 | 5.1E-06 | 3.375E-06 | 9.363E-07 |
| 7130 | Y10B_A | A16B_N | K17B_A | L23B_R | 9.4E-07 | 7.4E-06 | 3.377E-06 | 1.407E-06 |
| 7131 | G13B_A | Y10B_A | A16B_N | E18B_T | 1.3E-06 | 7.4E-06 | 3.380E-06 | 1.743E-06 |
| 7132 | Y10B_A | S5B_A  | L23B_Q | T2B_A  | 1.9E-06 | 5.8E-06 | 3.380E-06 | 1.101E-06 |
| 7133 | S8B_A  | G13B_W | K17B_A | E12B_A | 2.1E-06 | 5.4E-06 | 3.380E-06 | 7.770E-07 |
| 7134 | G13B_A | K17B_A | T4B_A  | V24B_Q | 2.4E-06 | 6.3E-06 | 3.380E-06 | 1.062E-06 |
| 7135 | G13B_A | S5B_A  | K17B_A | V24B_T | 2.1E-06 | 4.7E-06 | 3.380E-06 | 7.592E-07 |
| 7136 | Y10B_A | F3B_A  | A16B_N | S9B_A  | 7.6E-07 | 7.0E-06 | 3.385E-06 | 1.550E-06 |
| 7137 | G13B_A | D6B_A  | E18B_T | K17B_A | 1.8E-06 | 4.9E-06 | 3.385E-06 | 8.293E-07 |
| 7138 | G13B_A | K17B_A | T4B_A  | L23B_Q | 1.6E-06 | 4.9E-06 | 3.390E-06 | 9.684E-07 |
| 7139 | Y10B_A | S8B_A  | S5B_A  | V24B_T | 1.5E-06 | 7.4E-06 | 3.390E-06 | 1.223E-06 |
| 7140 | Y10B_A | E18B_A | T4B_A  | F19B_Q | 1.5E-06 | 6.3E-06 | 3.390E-06 | 1.282E-06 |
| 7141 | Y10B_A | S5B_A  | V24B_T | Q14B_A | 1.9E-06 | 5.3E-06 | 3.390E-06 | 8.801E-07 |
| 7142 | Y10B_A | D6B_A  | L11B_A | S9B_A  | 2.3E-06 | 5.1E-06 | 3.390E-06 | 8.705E-07 |
| 7143 | G13B_A | Y10B_A | K17B_S | T2B_A  | 1.8E-06 | 5.1E-06 | 3.390E-06 | 9.781E-07 |
| 7144 | Y10B_A | G13B_W | T4B_A  | G1B_A  | 2.6E-06 | 4.5E-06 | 3.395E-06 | 4.936E-07 |
| 7145 | Y10B_A | Q14B_A | T2B_A  | V24B_N | 1.4E-06 | 5.1E-06 | 3.395E-06 | 1.100E-06 |
| 7146 | G13B_A | E18B_A | T4B_A  | E12B_A | 1.5E-06 | 4.9E-06 | 3.400E-06 | 8.066E-07 |
| 7147 | Y10B_A | S5B_A  | K17B_S | F19B_A | 1.5E-06 | 5.7E-06 | 3.400E-06 | 1.105E-06 |
| 7148 | G13B_A | S8B_A  | E18B_A | E12B_A | 2.5E-06 | 5.0E-06 | 3.400E-06 | 7.567E-07 |
| 7149 | S8B_A  | D6B_A  | T4B_A  | K17B_S | 1.9E-06 | 5.2E-06 | 3.400E-06 | 9.177E-07 |
| 7150 | G13B_A | D6B_A  | V7B_A  | L11B_A | 2.3E-06 | 5.0E-06 | 3.400E-06 | 7.518E-07 |
| 7151 | Y10B_A | D6B_A  | K17B_A | V24B_N | 1.5E-06 | 5.8E-06 | 3.400E-06 | 1.059E-06 |
| 7152 | G13B_A | F3B_A  | E18B_T | K17B_A | 2.0E-06 | 4.8E-06 | 3.400E-06 | 8.688E-07 |
| 7153 | G13B_A | A16B_N | Q14B_A | E12B_A | 9.5E-07 | 4.9E-06 | 3.403E-06 | 1.134E-06 |
| 7154 | S8B_A  | D6B_A  | A16B_N | E12B_A | 8.7E-07 | 5.9E-06 | 3.404E-06 | 1.455E-06 |
| 7155 | G13B_A | T4B_A  | K17B_S | T2B_A  | 2.2E-06 | 5.1E-06 | 3.405E-06 | 7.640E-07 |
| 7156 | Y10B_A | S5B_A  | Q14B_A | V24B_N | 2.5E-06 | 4.3E-06 | 3.405E-06 | 5.530E-07 |
| 7157 | Y10B_A | G13B_W | K17B_A | E12B_A | 1.8E-06 | 4.9E-06 | 3.410E-06 | 8.771E-07 |
| 7158 | G13B_A | T4B_A  | F19B_A | E12B_A | 2.0E-06 | 4.9E-06 | 3.410E-06 | 7.745E-07 |
| 7159 | Y10B_A | D6B_A  | A16B_N | S9B_A  | 1.2E-06 | 5.4E-06 | 3.410E-06 | 1.099E-06 |
| 7160 | Y10B_A | S8B_A  | T4B_A  | V24B_T | 2.0E-06 | 5.7E-06 | 3.410E-06 | 8.873E-07 |
| 7161 | G13B_A | Y10B_A | T4B_A  | K17B_S | 1.3E-06 | 5.4E-06 | 3.410E-06 | 1.073E-06 |
| 7162 | G13B_A | K17B_A | S9B_A  | G1B_A  | 2.0E-06 | 4.6E-06 | 3.420E-06 | 6.709E-07 |
| 7163 | Y10B_A | E18B_A | F19B_A | E12B_A | 1.7E-06 | 5.3E-06 | 3.420E-06 | 9.737E-07 |
| 7164 | G13B_A | G1B_R  | K17B_A | S9B_A  | 1.9E-06 | 4.8E-06 | 3.420E-06 | 7.958E-07 |
| 7165 | G13B_A | F3B_A  | E18B_A | G1B_R  | 2.5E-06 | 5.0E-06 | 3.420E-06 | 5.845E-07 |
| 7166 | Y10B_A | K17B_A | V24B_T | G1B_A  | 2.7E-06 | 4.3E-06 | 3.425E-06 | 5.399E-07 |
| 7167 | G13B_A | E18B_A | S5B_A  | E12B_A | 2.6E-06 | 5.3E-06 | 3.425E-06 | 7.100E-07 |
| 7168 | S8B_A  | G13B_W | F19B_A | T2B_A  | 2.3E-06 | 4.8E-06 | 3.425E-06 | 6.265E-07 |
| 7169 | S8B_A  | D6B_A  | K17B_A | V24B_T | 2.5E-06 | 6.0E-06 | 3.425E-06 | 7.920E-07 |
| 7170 | Y10B_A | D6B_A  | L11B_A | F19B_W | 1.6E-06 | 5.3E-06 | 3.425E-06 | 9.899E-07 |
| 7171 | G13B_A | A16B_N | F19B_W | T2B_A  | 9.0E-07 | 6.1E-06 | 3.425E-06 | 1.192E-06 |
| 7172 | Y10B_A | D6B_A  | G13B_W | A16B_N | 1.3E-06 | 6.3E-06 | 3.430E-06 | 1.362E-06 |
| 7173 | G13B_A | F3B_A  | T4B_A  | E12B_A | 2.3E-06 | 5.8E-06 | 3.430E-06 | 8.208E-07 |
| 7174 | Y10B_A | L11B_A | K17B_A | L23B_R | 2.3E-06 | 4.8E-06 | 3.430E-06 | 7.342E-07 |
| 7175 | Y10B_A | V7B_A  | K17B_A | F19B_Q | 1.5E-06 | 6.0E-06 | 3.430E-06 | 1.321E-06 |

|      |        |        |        |        |         |         |           |           |
|------|--------|--------|--------|--------|---------|---------|-----------|-----------|
| 7176 | Y10B_A | V24B_Q | Q14B_A | T2B_A  | 1.4E-06 | 5.7E-06 | 3.435E-06 | 9.615E-07 |
| 7177 | Y10B_A | E18B_T | L11B_A | T2B_A  | 1.2E-06 | 7.4E-06 | 3.435E-06 | 1.330E-06 |
| 7178 | Y10B_A | V7B_A  | K17B_A | V24B_Q | 1.6E-06 | 7.4E-06 | 3.435E-06 | 1.260E-06 |
| 7179 | G13B_A | Y10B_A | F19B_W | Q14B_A | 1.6E-06 | 5.5E-06 | 3.435E-06 | 9.494E-07 |
| 7180 | Y10B_A | S8B_A  | V7B_A  | E18B_T | 2.4E-06 | 6.3E-06 | 3.435E-06 | 1.132E-06 |
| 7181 | Y10B_A | A16B_N | L11B_A | G1B_R  | 1.1E-06 | 6.1E-06 | 3.435E-06 | 1.584E-06 |
| 7182 | G13B_A | G1B_R  | K17B_A | F19B_W | 1.8E-06 | 6.7E-06 | 3.440E-06 | 1.106E-06 |
| 7183 | Y10B_A | K17B_S | F19B_A | Q14B_A | 1.6E-06 | 7.0E-06 | 3.440E-06 | 1.177E-06 |
| 7184 | Y10B_A | S8B_A  | S5B_A  | L23B_R | 1.9E-06 | 4.7E-06 | 3.440E-06 | 7.783E-07 |
| 7185 | G13B_A | V7B_A  | E18B_A | G1B_A  | 2.6E-06 | 5.0E-06 | 3.440E-06 | 7.479E-07 |
| 7186 | S8B_A  | D6B_A  | E18B_A | F19B_W | 1.9E-06 | 6.9E-06 | 3.445E-06 | 1.296E-06 |
| 7187 | Y10B_A | D6B_A  | T4B_A  | K17B_S | 2.2E-06 | 4.5E-06 | 3.445E-06 | 7.171E-07 |
| 7188 | G13B_A | S8B_A  | K17B_A | V24B_T | 2.4E-06 | 5.3E-06 | 3.445E-06 | 7.864E-07 |
| 7189 | Y10B_A | E18B_T | G1B_R  | T4B_A  | 2.0E-06 | 1.0E-05 | 3.445E-06 | 1.825E-06 |
| 7190 | G13B_A | Y10B_A | A16B_N | F19B_W | 8.7E-07 | 6.6E-06 | 3.448E-06 | 1.603E-06 |
| 7191 | Y10B_A | A16B_N | S5B_A  | S9B_A  | 1.2E-06 | 6.0E-06 | 3.450E-06 | 1.083E-06 |
| 7192 | Y10B_A | S8B_A  | E18B_A | F19B_Q | 2.0E-06 | 5.1E-06 | 3.450E-06 | 8.389E-07 |
| 7193 | G13B_A | K17B_A | T4B_A  | L23B_R | 1.9E-06 | 5.4E-06 | 3.450E-06 | 9.041E-07 |
| 7194 | Y10B_A | L11B_A | S5B_A  | S9B_A  | 2.3E-06 | 5.1E-06 | 3.450E-06 | 7.345E-07 |
| 7195 | G13B_A | F3B_A  | E18B_A | G1B_A  | 2.6E-06 | 4.8E-06 | 3.450E-06 | 6.194E-07 |
| 7196 | Y10B_A | E18B_A | F19B_Q | Q14B_A | 1.6E-06 | 7.0E-06 | 3.450E-06 | 1.382E-06 |
| 7197 | G13B_A | A16B_N | T4B_A  | E12B_A | 5.9E-07 | 5.7E-06 | 3.454E-06 | 1.659E-06 |
| 7198 | G13B_A | S8B_A  | K17B_S | Q14B_A | 2.5E-06 | 4.9E-06 | 3.455E-06 | 6.708E-07 |
| 7199 | G13B_A | F19B_A | Q14B_A | E12B_A | 2.0E-06 | 4.9E-06 | 3.455E-06 | 8.166E-07 |
| 7200 | G13B_A | F19B_A | T2B_A  | E12B_A | 1.7E-06 | 4.7E-06 | 3.455E-06 | 7.870E-07 |
| 7201 | Y10B_A | K17B_A | V24B_Q | G1B_A  | 1.7E-06 | 5.3E-06 | 3.460E-06 | 1.022E-06 |
| 7202 | G13B_A | V7B_A  | F3B_A  | E18B_A | 2.4E-06 | 5.3E-06 | 3.460E-06 | 8.929E-07 |
| 7203 | Y10B_A | G13B_W | G1B_R  | T4B_A  | 1.9E-06 | 4.9E-06 | 3.465E-06 | 7.604E-07 |
| 7204 | Y10B_A | L11B_A | K17B_A | V24B_T | 2.3E-06 | 4.5E-06 | 3.465E-06 | 6.792E-07 |
| 7205 | G13B_A | Y10B_A | F3B_A  | E12B_A | 1.9E-06 | 6.0E-06 | 3.470E-06 | 1.221E-06 |
| 7206 | Y10B_A | D6B_A  | F3B_A  | F19B_W | 2.1E-06 | 5.9E-06 | 3.470E-06 | 1.050E-06 |
| 7207 | G13B_A | E18B_A | F19B_W | T4B_A  | 1.6E-06 | 6.1E-06 | 3.470E-06 | 1.448E-06 |
| 7208 | Y10B_A | L11B_A | K17B_S | T2B_A  | 1.5E-06 | 6.0E-06 | 3.475E-06 | 1.055E-06 |
| 7209 | G13B_A | D6B_A  | L11B_A | G1B_A  | 1.9E-06 | 5.0E-06 | 3.475E-06 | 8.813E-07 |
| 7210 | S8B_A  | D6B_A  | L11B_A | E12B_A | 2.4E-06 | 4.7E-06 | 3.475E-06 | 7.033E-07 |
| 7211 | G13B_A | V7B_A  | A16B_N | F19B_A | 1.4E-06 | 8.1E-06 | 3.475E-06 | 1.615E-06 |
| 7212 | Y10B_A | F3B_A  | K17B_A | L23B_R | 2.1E-06 | 4.7E-06 | 3.475E-06 | 8.397E-07 |
| 7213 | Y10B_A | D6B_A  | E18B_A | F19B_W | 1.9E-06 | 5.7E-06 | 3.475E-06 | 1.054E-06 |
| 7214 | G13B_A | D6B_A  | A16B_N | G1B_R  | 7.4E-07 | 5.8E-06 | 3.477E-06 | 1.358E-06 |
| 7215 | Y10B_A | V7B_A  | E18B_T | T2B_A  | 2.0E-06 | 5.4E-06 | 3.480E-06 | 7.991E-07 |
| 7216 | G13B_A | E18B_A | T2B_A  | E12B_A | 2.4E-06 | 5.8E-06 | 3.480E-06 | 7.324E-07 |
| 7217 | G13B_A | E18B_A | G1B_R  | F19B_A | 2.5E-06 | 5.3E-06 | 3.480E-06 | 8.141E-07 |
| 7218 | G13B_A | Y10B_A | E18B_T | T2B_A  | 2.4E-06 | 5.7E-06 | 3.480E-06 | 8.661E-07 |
| 7219 | G13B_A | S5B_A  | K17B_A | L23B_Q | 2.1E-06 | 6.0E-06 | 3.480E-06 | 1.010E-06 |
| 7220 | S8B_A  | D6B_A  | E12B_A | G1B_A  | 2.1E-06 | 4.9E-06 | 3.485E-06 | 6.124E-07 |
| 7221 | Y10B_A | S8B_A  | V24B_T | Q14B_A | 1.9E-06 | 4.8E-06 | 3.485E-06 | 7.293E-07 |
| 7222 | G13B_A | Y10B_A | K17B_A | L23B_R | 2.2E-06 | 6.7E-06 | 3.485E-06 | 9.213E-07 |
| 7223 | G13B_A | S8B_A  | F19B_W | T4B_A  | 1.7E-06 | 6.5E-06 | 3.485E-06 | 1.205E-06 |
| 7224 | Y10B_A | G13B_W | Q14B_A | G1B_A  | 2.4E-06 | 4.5E-06 | 3.490E-06 | 6.315E-07 |
| 7225 | G13B_A | A16B_N | E18B_A | F19B_A | 1.8E-06 | 5.7E-06 | 3.490E-06 | 1.015E-06 |
| 7226 | Y10B_A | G13B_W | L11B_A | T4B_A  | 2.0E-06 | 5.2E-06 | 3.490E-06 | 9.380E-07 |
| 7227 | G13B_A | Y10B_A | K17B_S | Q14B_A | 1.9E-06 | 5.1E-06 | 3.490E-06 | 8.926E-07 |

|      |        |        |        |        |         |         |           |           |
|------|--------|--------|--------|--------|---------|---------|-----------|-----------|
| 7228 | Y10B_A | S8B_A  | G13B_W | A16B_N | 6.4E-07 | 5.8E-06 | 3.494E-06 | 1.682E-06 |
| 7229 | Y10B_A | D6B_A  | S5B_A  | F19B_Q | 1.1E-06 | 6.5E-06 | 3.495E-06 | 1.556E-06 |
| 7230 | Y10B_A | E18B_T | T4B_A  | G1B_A  | 2.4E-06 | 5.3E-06 | 3.495E-06 | 8.095E-07 |
| 7231 | G13B_A | L11B_A | F19B_A | G1B_A  | 2.1E-06 | 5.5E-06 | 3.495E-06 | 9.854E-07 |
| 7232 | S8B_A  | G13B_W | G1B_R  | Q14B_A | 2.6E-06 | 4.7E-06 | 3.495E-06 | 6.295E-07 |
| 7233 | G13B_A | E18B_T | G1B_R  | K17B_A | 1.6E-06 | 5.2E-06 | 3.500E-06 | 1.072E-06 |
| 7234 | G13B_A | E18B_T | Q14B_A | T2B_A  | 2.4E-06 | 5.6E-06 | 3.500E-06 | 1.025E-06 |
| 7235 | G13B_A | A16B_N | F19B_A | G1B_A  | 1.1E-06 | 5.9E-06 | 3.505E-06 | 1.461E-06 |
| 7236 | Y10B_A | F3B_A  | K17B_A | F19B_Q | 1.8E-06 | 6.3E-06 | 3.510E-06 | 1.119E-06 |
| 7237 | Y10B_A | S5B_A  | L23B_Q | Q14B_A | 1.6E-06 | 5.8E-06 | 3.510E-06 | 8.777E-07 |
| 7238 | Y10B_A | S8B_A  | E18B_A | K17B_S | 1.6E-06 | 6.1E-06 | 3.510E-06 | 1.213E-06 |
| 7239 | S8B_A  | G13B_W | F19B_A | Q14B_A | 2.1E-06 | 5.3E-06 | 3.515E-06 | 9.522E-07 |
| 7240 | S8B_A  | D6B_A  | S5B_A  | K17B_S | 1.7E-06 | 7.9E-06 | 3.515E-06 | 1.412E-06 |
| 7241 | G13B_A | D6B_A  | E18B_A | G1B_R  | 2.6E-06 | 5.9E-06 | 3.515E-06 | 8.331E-07 |
| 7242 | G13B_A | L11B_A | E18B_A | F19B_A | 1.9E-06 | 4.8E-06 | 3.515E-06 | 7.169E-07 |
| 7243 | G13B_A | F3B_A  | A16B_N | S5B_A  | 8.2E-07 | 6.2E-06 | 3.518E-06 | 1.742E-06 |
| 7244 | Y10B_A | K17B_A | L23B_R | G1B_A  | 1.6E-06 | 5.7E-06 | 3.520E-06 | 8.697E-07 |
| 7245 | Y10B_A | V7B_A  | S9B_A  | Q14B_A | 2.8E-06 | 5.4E-06 | 3.520E-06 | 6.040E-07 |
| 7246 | G13B_A | Y10B_A | K17B_A | V24B_Q | 1.6E-06 | 6.3E-06 | 3.520E-06 | 1.211E-06 |
| 7247 | G13B_A | V7B_A  | A16B_N | Q14B_A | 9.6E-07 | 6.8E-06 | 3.523E-06 | 1.571E-06 |
| 7248 | Y10B_A | G1B_R  | S9B_A  | T2B_A  | 1.8E-06 | 5.2E-06 | 3.525E-06 | 8.546E-07 |
| 7249 | G13B_A | D6B_A  | V7B_A  | F3B_A  | 2.1E-06 | 6.3E-06 | 3.525E-06 | 8.955E-07 |
| 7250 | Y10B_A | K17B_A | L23B_Q | G1B_A  | 2.1E-06 | 6.5E-06 | 3.525E-06 | 1.119E-06 |
| 7251 | Y10B_A | F3B_A  | S9B_A  | Q14B_A | 2.0E-06 | 4.6E-06 | 3.525E-06 | 8.747E-07 |
| 7252 | G13B_A | A16B_N | L11B_A | F19B_A | 1.2E-06 | 6.2E-06 | 3.525E-06 | 1.385E-06 |
| 7253 | Y10B_A | L23B_Q | Q14B_A | T2B_A  | 1.8E-06 | 6.7E-06 | 3.525E-06 | 1.122E-06 |
| 7254 | Y10B_A | G13B_W | G1B_R  | S5B_A  | 1.7E-06 | 6.0E-06 | 3.530E-06 | 1.032E-06 |
| 7255 | Y10B_A | G1B_R  | S9B_A  | Q14B_A | 2.5E-06 | 4.5E-06 | 3.530E-06 | 6.562E-07 |
| 7256 | S8B_A  | D6B_A  | K17B_A | L23B_Q | 1.7E-06 | 6.2E-06 | 3.535E-06 | 1.100E-06 |
| 7257 | G13B_A | D6B_A  | Q14B_A | E12B_A | 2.5E-06 | 8.3E-06 | 3.535E-06 | 1.325E-06 |
| 7258 | Y10B_A | D6B_A  | V7B_A  | F19B_W | 2.1E-06 | 5.0E-06 | 3.540E-06 | 9.040E-07 |
| 7259 | G13B_A | F3B_A  | E18B_A | F19B_A | 1.9E-06 | 6.7E-06 | 3.540E-06 | 1.099E-06 |
| 7260 | G13B_A | K17B_A | T4B_A  | V24B_T | 2.3E-06 | 5.1E-06 | 3.540E-06 | 7.910E-07 |
| 7261 | G13B_A | D6B_A  | F19B_W | Q14B_A | 1.3E-06 | 6.2E-06 | 3.540E-06 | 1.109E-06 |
| 7262 | Y10B_A | G13B_W | A16B_N | S5B_A  | 9.6E-07 | 5.8E-06 | 3.541E-06 | 1.574E-06 |
| 7263 | G13B_A | Y10B_A | E18B_T | S5B_A  | 2.0E-06 | 7.4E-06 | 3.545E-06 | 1.420E-06 |
| 7264 | Y10B_A | S8B_A  | E12B_A | G1B_A  | 2.2E-06 | 4.9E-06 | 3.545E-06 | 6.629E-07 |
| 7265 | Y10B_A | F3B_A  | S5B_A  | K17B_S | 1.9E-06 | 5.4E-06 | 3.545E-06 | 7.870E-07 |
| 7266 | G13B_A | Y10B_A | E18B_T | T4B_A  | 2.0E-06 | 5.0E-06 | 3.550E-06 | 9.367E-07 |
| 7267 | G13B_A | Y10B_A | S8B_A  | E18B_T | 1.9E-06 | 6.3E-06 | 3.550E-06 | 1.197E-06 |
| 7268 | S8B_A  | G13B_W | V7B_A  | Q14B_A | 2.6E-06 | 4.6E-06 | 3.550E-06 | 5.482E-07 |
| 7269 | Y10B_A | F3B_A  | E18B_T | T4B_A  | 2.2E-06 | 6.3E-06 | 3.555E-06 | 1.133E-06 |
| 7270 | Y10B_A | F3B_A  | E18B_T | Q14B_A | 2.4E-06 | 6.6E-06 | 3.555E-06 | 1.037E-06 |
| 7271 | Y10B_A | S5B_A  | T4B_A  | L23B_Q | 1.5E-06 | 4.9E-06 | 3.555E-06 | 8.049E-07 |
| 7272 | S8B_A  | G13B_W | G1B_R  | T4B_A  | 1.8E-06 | 5.1E-06 | 3.555E-06 | 8.660E-07 |
| 7273 | Y10B_A | A16B_N | K17B_S | T2B_A  | 7.7E-07 | 6.4E-06 | 3.557E-06 | 1.609E-06 |
| 7274 | Y10B_A | S8B_A  | E18B_T | G1B_A  | 2.4E-06 | 5.6E-06 | 3.560E-06 | 8.792E-07 |
| 7275 | Y10B_A | G13B_W | F3B_A  | S5B_A  | 1.4E-06 | 7.5E-06 | 3.560E-06 | 1.144E-06 |
| 7276 | Y10B_A | F3B_A  | E18B_T | S5B_A  | 2.4E-06 | 7.4E-06 | 3.560E-06 | 1.019E-06 |
| 7277 | Y10B_A | G13B_W | G1B_R  | Q14B_A | 2.6E-06 | 4.9E-06 | 3.560E-06 | 5.888E-07 |
| 7278 | Y10B_A | A16B_N | E18B_A | E12B_A | 1.1E-06 | 5.9E-06 | 3.560E-06 | 1.207E-06 |
| 7279 | G13B_A | Y10B_A | S5B_A  | E12B_A | 2.1E-06 | 5.8E-06 | 3.565E-06 | 9.599E-07 |

|      |        |        |        |        |         |         |           |           |
|------|--------|--------|--------|--------|---------|---------|-----------|-----------|
| 7280 | Y10B_A | K17B_S | F19B_A | T2B_A  | 1.6E-06 | 5.8E-06 | 3.565E-06 | 1.107E-06 |
| 7281 | G13B_A | T4B_A  | K17B_S | Q14B_A | 2.2E-06 | 7.0E-06 | 3.565E-06 | 1.109E-06 |
| 7282 | G13B_A | K17B_A | L23B_Q | T2B_A  | 1.6E-06 | 5.5E-06 | 3.565E-06 | 8.863E-07 |
| 7283 | Y10B_A | V24B_T | Q14B_A | T2B_A  | 2.0E-06 | 5.6E-06 | 3.565E-06 | 8.598E-07 |
| 7284 | Y10B_A | F3B_A  | K17B_A | V24B_T | 2.4E-06 | 5.1E-06 | 3.570E-06 | 7.895E-07 |
| 7285 | Y10B_A | S8B_A  | L23B_R | Q14B_A | 2.2E-06 | 6.7E-06 | 3.570E-06 | 9.969E-07 |
| 7286 | G13B_A | F3B_A  | F19B_W | Q14B_A | 1.4E-06 | 7.6E-06 | 3.570E-06 | 1.508E-06 |
| 7287 | Y10B_A | A16B_N | E18B_T | Q14B_A | 6.9E-07 | 6.7E-06 | 3.575E-06 | 1.897E-06 |
| 7288 | G13B_A | S8B_A  | D6B_A  | E12B_A | 2.2E-06 | 6.0E-06 | 3.575E-06 | 9.999E-07 |
| 7289 | S8B_A  | G13B_W | G1B_R  | T2B_A  | 1.9E-06 | 5.7E-06 | 3.575E-06 | 1.061E-06 |
| 7290 | G13B_A | E18B_T | T4B_A  | T2B_A  | 2.4E-06 | 4.8E-06 | 3.575E-06 | 8.328E-07 |
| 7291 | Y10B_A | A16B_N | K17B_A | L23B_Q | 7.4E-07 | 7.4E-06 | 3.577E-06 | 1.557E-06 |
| 7292 | Y10B_A | S9B_A  | Q14B_A | G1B_A  | 1.8E-06 | 5.6E-06 | 3.580E-06 | 8.408E-07 |
| 7293 | Y10B_A | E18B_T | K17B_A | F19B_A | 2.1E-06 | 5.2E-06 | 3.580E-06 | 7.466E-07 |
| 7294 | Y10B_A | S8B_A  | V24B_T | T2B_A  | 2.0E-06 | 6.3E-06 | 3.580E-06 | 1.039E-06 |
| 7295 | G13B_A | L11B_A | K17B_A | S9B_A  | 2.5E-06 | 6.3E-06 | 3.585E-06 | 7.707E-07 |
| 7296 | Y10B_A | E18B_A | K17B_A | V24B_Q | 2.1E-06 | 5.2E-06 | 3.585E-06 | 8.845E-07 |
| 7297 | G13B_A | V7B_A  | F3B_A  | G1B_A  | 2.5E-06 | 6.2E-06 | 3.585E-06 | 1.040E-06 |
| 7298 | G13B_A | D6B_A  | F3B_A  | F19B_A | 2.1E-06 | 7.8E-06 | 3.585E-06 | 1.265E-06 |
| 7299 | G13B_A | L11B_A | E18B_A | G1B_R  | 2.5E-06 | 5.5E-06 | 3.585E-06 | 8.487E-07 |
| 7300 | Y10B_A | S9B_A  | F19B_A | Q14B_A | 1.7E-06 | 6.7E-06 | 3.585E-06 | 1.062E-06 |
| 7301 | G13B_A | A16B_N | E18B_T | K17B_A | 7.2E-07 | 9.2E-06 | 3.586E-06 | 1.818E-06 |
| 7302 | G13B_A | S5B_A  | K17B_S | T2B_A  | 1.7E-06 | 7.7E-06 | 3.590E-06 | 1.447E-06 |
| 7303 | Y10B_A | G1B_R  | T4B_A  | S9B_A  | 2.2E-06 | 5.2E-06 | 3.595E-06 | 8.846E-07 |
| 7304 | Y10B_A | S8B_A  | E18B_T | G1B_R  | 1.9E-06 | 6.1E-06 | 3.600E-06 | 1.100E-06 |
| 7305 | Y10B_A | D6B_A  | K17B_S | Q14B_A | 1.9E-06 | 7.0E-06 | 3.600E-06 | 1.247E-06 |
| 7306 | S8B_A  | G13B_W | L11B_A | T2B_A  | 2.6E-06 | 5.2E-06 | 3.600E-06 | 6.704E-07 |
| 7307 | G13B_A | D6B_A  | V7B_A  | A16B_N | 1.1E-06 | 5.9E-06 | 3.600E-06 | 1.574E-06 |
| 7308 | Y10B_A | V7B_A  | S9B_A  | T2B_A  | 2.4E-06 | 5.9E-06 | 3.605E-06 | 8.864E-07 |
| 7309 | Y10B_A | S5B_A  | K17B_S | G1B_A  | 2.0E-06 | 6.0E-06 | 3.605E-06 | 9.316E-07 |
| 7310 | Y10B_A | E18B_A | K17B_A | L23B_Q | 2.2E-06 | 5.2E-06 | 3.605E-06 | 9.478E-07 |
| 7311 | S8B_A  | G13B_W | L11B_A | S5B_A  | 2.6E-06 | 5.0E-06 | 3.610E-06 | 6.836E-07 |
| 7312 | Y10B_A | V7B_A  | S5B_A  | S9B_A  | 2.5E-06 | 5.4E-06 | 3.610E-06 | 6.577E-07 |
| 7313 | Y10B_A | V7B_A  | K17B_S | T2B_A  | 2.2E-06 | 5.4E-06 | 3.615E-06 | 9.178E-07 |
| 7314 | Y10B_A | F3B_A  | T4B_A  | S9B_A  | 2.0E-06 | 5.4E-06 | 3.615E-06 | 8.067E-07 |
| 7315 | G13B_A | D6B_A  | F3B_A  | G1B_R  | 1.5E-06 | 4.9E-06 | 3.615E-06 | 9.332E-07 |
| 7316 | G13B_A | E18B_T | L11B_A | K17B_A | 2.3E-06 | 6.9E-06 | 3.615E-06 | 1.293E-06 |
| 7317 | Y10B_A | T4B_A  | L23B_Q | Q14B_A | 1.3E-06 | 6.0E-06 | 3.615E-06 | 1.043E-06 |
| 7318 | Y10B_A | S8B_A  | V24B_Q | T2B_A  | 1.7E-06 | 9.1E-06 | 3.620E-06 | 1.713E-06 |
| 7319 | S8B_A  | G13B_W | Q14B_A | G1B_A  | 2.3E-06 | 5.0E-06 | 3.620E-06 | 6.887E-07 |
| 7320 | S8B_A  | D6B_A  | V7B_A  | F19B_W | 1.8E-06 | 7.0E-06 | 3.620E-06 | 1.376E-06 |
| 7321 | G13B_A | E18B_A | K17B_A | S9B_A  | 2.5E-06 | 4.7E-06 | 3.625E-06 | 6.544E-07 |
| 7322 | Y10B_A | G1B_R  | F19B_W | Q14B_A | 1.8E-06 | 6.0E-06 | 3.625E-06 | 1.184E-06 |
| 7323 | Y10B_A | S8B_A  | T4B_A  | L23B_Q | 1.7E-06 | 5.8E-06 | 3.625E-06 | 1.086E-06 |
| 7324 | Y10B_A | T4B_A  | V24B_Q | Q14B_A | 1.7E-06 | 7.4E-06 | 3.625E-06 | 1.278E-06 |
| 7325 | Y10B_A | T4B_A  | Q14B_A | V24B_N | 1.9E-06 | 7.4E-06 | 3.625E-06 | 1.262E-06 |
| 7326 | G13B_A | S8B_A  | S5B_A  | E12B_A | 2.2E-06 | 5.8E-06 | 3.630E-06 | 1.051E-06 |
| 7327 | G13B_A | E18B_T | S5B_A  | T4B_A  | 2.1E-06 | 6.9E-06 | 3.630E-06 | 1.089E-06 |
| 7328 | Y10B_A | G13B_W | F19B_A | T2B_A  | 2.3E-06 | 6.9E-06 | 3.630E-06 | 1.021E-06 |
| 7329 | Y10B_A | S8B_A  | L11B_A | K17B_S | 2.4E-06 | 5.4E-06 | 3.630E-06 | 9.183E-07 |
| 7330 | G13B_A | S8B_A  | E18B_T | T4B_A  | 1.9E-06 | 6.6E-06 | 3.630E-06 | 1.169E-06 |
| 7331 | Y10B_A | D6B_A  | E18B_A | E12B_A | 2.4E-06 | 5.7E-06 | 3.630E-06 | 7.665E-07 |

|      |        |        |        |        |         |         |           |           |
|------|--------|--------|--------|--------|---------|---------|-----------|-----------|
| 7332 | G13B_A | K17B_A | S9B_A  | F19B_A | 2.4E-06 | 7.1E-06 | 3.630E-06 | 1.156E-06 |
| 7333 | Y10B_A | G1B_R  | Q14B_A | E12B_A | 2.4E-06 | 5.4E-06 | 3.630E-06 | 7.901E-07 |
| 7334 | S8B_A  | G13B_W | L11B_A | T4B_A  | 2.3E-06 | 5.2E-06 | 3.635E-06 | 6.846E-07 |
| 7335 | Y10B_A | S8B_A  | S9B_A  | G1B_A  | 1.7E-06 | 5.7E-06 | 3.635E-06 | 1.119E-06 |
| 7336 | Y10B_A | V7B_A  | F3B_A  | G1B_R  | 2.4E-06 | 6.0E-06 | 3.640E-06 | 8.543E-07 |
| 7337 | G13B_A | Y10B_A | T4B_A  | S9B_A  | 2.0E-06 | 5.4E-06 | 3.640E-06 | 9.344E-07 |
| 7338 | G13B_A | Y10B_A | L11B_A | F19B_W | 1.8E-06 | 5.5E-06 | 3.640E-06 | 7.890E-07 |
| 7339 | Y10B_A | S8B_A  | A16B_N | F19B_Q | 1.2E-06 | 1.1E-05 | 3.640E-06 | 2.449E-06 |
| 7340 | Y10B_A | G13B_W | F3B_A  | T4B_A  | 2.3E-06 | 5.5E-06 | 3.645E-06 | 8.988E-07 |
| 7341 | G13B_A | F19B_W | Q14B_A | T2B_A  | 1.9E-06 | 6.1E-06 | 3.645E-06 | 1.250E-06 |
| 7342 | S8B_A  | G13B_W | T4B_A  | F19B_A | 2.0E-06 | 6.2E-06 | 3.650E-06 | 9.572E-07 |
| 7343 | Y10B_A | S8B_A  | K17B_S | F19B_A | 1.9E-06 | 6.0E-06 | 3.650E-06 | 1.064E-06 |
| 7344 | S8B_A  | D6B_A  | F3B_A  | E12B_A | 2.4E-06 | 5.5E-06 | 3.650E-06 | 9.157E-07 |
| 7345 | Y10B_A | S8B_A  | L23B_R | T2B_A  | 2.3E-06 | 5.7E-06 | 3.650E-06 | 8.618E-07 |
| 7346 | Y10B_A | G1B_R  | K17B_A | F19B_Q | 1.7E-06 | 5.2E-06 | 3.650E-06 | 1.035E-06 |
| 7347 | G13B_A | Y10B_A | S5B_A  | F19B_W | 1.8E-06 | 5.2E-06 | 3.650E-06 | 1.061E-06 |
| 7348 | Y10B_A | F3B_A  | S9B_A  | T2B_A  | 2.3E-06 | 6.0E-06 | 3.655E-06 | 9.288E-07 |
| 7349 | G13B_A | S8B_A  | E18B_T | S5B_A  | 2.4E-06 | 5.7E-06 | 3.655E-06 | 1.007E-06 |
| 7350 | S8B_A  | G13B_W | T2B_A  | G1B_A  | 2.2E-06 | 4.6E-06 | 3.655E-06 | 7.030E-07 |
| 7351 | G13B_A | G1B_R  | F19B_A | T2B_A  | 2.4E-06 | 5.2E-06 | 3.655E-06 | 7.236E-07 |
| 7352 | Y10B_A | S8B_A  | L23B_Q | T2B_A  | 1.7E-06 | 5.4E-06 | 3.655E-06 | 1.038E-06 |
| 7353 | Y10B_A | E18B_A | K17B_A | L23B_R | 2.4E-06 | 5.2E-06 | 3.660E-06 | 7.877E-07 |
| 7354 | Y10B_A | D6B_A  | K17B_S | T2B_A  | 2.0E-06 | 5.8E-06 | 3.660E-06 | 9.859E-07 |
| 7355 | S8B_A  | D6B_A  | K17B_S | Q14B_A | 2.0E-06 | 5.8E-06 | 3.665E-06 | 9.681E-07 |
| 7356 | Y10B_A | S8B_A  | T4B_A  | L23B_R | 2.2E-06 | 5.7E-06 | 3.665E-06 | 9.756E-07 |
| 7357 | G13B_A | A16B_N | L11B_A | G1B_A  | 8.6E-07 | 7.5E-06 | 3.668E-06 | 1.528E-06 |
| 7358 | G13B_A | S8B_A  | T4B_A  | S9B_A  | 2.0E-06 | 9.1E-06 | 3.670E-06 | 1.427E-06 |
| 7359 | Y10B_A | S8B_A  | G1B_R  | S9B_A  | 2.6E-06 | 5.9E-06 | 3.670E-06 | 8.862E-07 |
| 7360 | Y10B_A | A16B_N | K17B_S | Q14B_A | 6.9E-07 | 5.4E-06 | 3.670E-06 | 1.272E-06 |
| 7361 | G13B_A | S8B_A  | D6B_A  | F19B_W | 2.2E-06 | 7.2E-06 | 3.675E-06 | 1.434E-06 |
| 7362 | G13B_A | T4B_A  | S9B_A  | Q14B_A | 1.3E-06 | 5.6E-06 | 3.675E-06 | 9.552E-07 |
| 7363 | Y10B_A | D6B_A  | K17B_A | L23B_Q | 1.6E-06 | 6.2E-06 | 3.675E-06 | 1.109E-06 |
| 7364 | Y10B_A | E18B_T | T4B_A  | F19B_A | 2.3E-06 | 5.9E-06 | 3.680E-06 | 1.169E-06 |
| 7365 | Y10B_A | V7B_A  | E18B_T | Q14B_A | 2.4E-06 | 5.4E-06 | 3.680E-06 | 7.654E-07 |
| 7366 | Y10B_A | S8B_A  | F19B_Q | T2B_A  | 1.9E-06 | 6.2E-06 | 3.680E-06 | 1.235E-06 |
| 7367 | Y10B_A | A16B_N | S5B_A  | F19B_Q | 1.5E-06 | 8.0E-06 | 3.680E-06 | 1.633E-06 |
| 7368 | G13B_A | E18B_A | F19B_A | G1B_A  | 1.9E-06 | 6.2E-06 | 3.685E-06 | 1.265E-06 |
| 7369 | Y10B_A | T4B_A  | F19B_Q | Q14B_A | 1.4E-06 | 5.6E-06 | 3.685E-06 | 1.117E-06 |
| 7370 | G13B_A | V7B_A  | G1B_R  | T4B_A  | 2.3E-06 | 4.7E-06 | 3.685E-06 | 6.133E-07 |
| 7371 | Y10B_A | S8B_A  | S5B_A  | L23B_Q | 2.1E-06 | 5.2E-06 | 3.690E-06 | 7.973E-07 |
| 7372 | Y10B_A | L11B_A | K17B_S | Q14B_A | 1.9E-06 | 6.0E-06 | 3.690E-06 | 1.037E-06 |
| 7373 | Y10B_A | V7B_A  | E18B_T | S5B_A  | 2.2E-06 | 5.9E-06 | 3.690E-06 | 9.646E-07 |
| 7374 | Y10B_A | E18B_T | S5B_A  | G1B_A  | 1.9E-06 | 5.6E-06 | 3.695E-06 | 8.888E-07 |
| 7375 | G13B_A | D6B_A  | K17B_A | F19B_W | 2.0E-06 | 6.9E-06 | 3.695E-06 | 1.161E-06 |
| 7376 | Y10B_A | F3B_A  | F19B_W | T4B_A  | 2.3E-06 | 6.2E-06 | 3.695E-06 | 1.297E-06 |
| 7377 | G13B_A | Y10B_A | S5B_A  | S9B_A  | 2.0E-06 | 5.4E-06 | 3.695E-06 | 8.382E-07 |
| 7378 | Y10B_A | L11B_A | T4B_A  | S9B_A  | 2.0E-06 | 5.4E-06 | 3.700E-06 | 8.602E-07 |
| 7379 | Y10B_A | L11B_A | S5B_A  | F19B_Q | 1.7E-06 | 5.8E-06 | 3.700E-06 | 1.120E-06 |
| 7380 | Y10B_A | G1B_R  | S5B_A  | S9B_A  | 2.5E-06 | 5.6E-06 | 3.700E-06 | 7.034E-07 |
| 7381 | Y10B_A | S8B_A  | T4B_A  | V24B_Q | 2.0E-06 | 5.3E-06 | 3.700E-06 | 1.053E-06 |
| 7382 | S8B_A  | D6B_A  | G13B_W | S5B_A  | 2.4E-06 | 5.6E-06 | 3.705E-06 | 7.388E-07 |
| 7383 | G13B_A | S8B_A  | K17B_A | F19B_Q | 1.1E-06 | 7.7E-06 | 3.705E-06 | 1.950E-06 |

|      |        |        |        |        |         |         |           |           |
|------|--------|--------|--------|--------|---------|---------|-----------|-----------|
| 7384 | G13B_A | Y10B_A | F19B_W | T2B_A  | 2.1E-06 | 5.2E-06 | 3.705E-06 | 9.076E-07 |
| 7385 | Y10B_A | F19B_W | Q14B_A | G1B_A  | 2.2E-06 | 7.5E-06 | 3.705E-06 | 1.307E-06 |
| 7386 | Y10B_A | V7B_A  | E18B_T | T4B_A  | 2.5E-06 | 5.6E-06 | 3.705E-06 | 7.824E-07 |
| 7387 | G13B_A | D6B_A  | A16B_N | E18B_A | 8.0E-07 | 7.9E-06 | 3.705E-06 | 1.741E-06 |
| 7388 | S8B_A  | V7B_A  | F3B_A  | G1B_R  | 2.1E-06 | 7.1E-06 | 3.705E-06 | 1.017E-06 |
| 7389 | Y10B_A | G13B_W | L11B_A | S5B_A  | 2.3E-06 | 5.9E-06 | 3.705E-06 | 9.992E-07 |
| 7390 | G13B_A | V7B_A  | E18B_T | K17B_A | 2.4E-06 | 5.6E-06 | 3.710E-06 | 8.084E-07 |
| 7391 | Y10B_A | S8B_A  | V7B_A  | K17B_S | 2.1E-06 | 6.3E-06 | 3.710E-06 | 1.069E-06 |
| 7392 | Y10B_A | A16B_N | E18B_T | T4B_A  | 9.5E-07 | 7.0E-06 | 3.713E-06 | 1.421E-06 |
| 7393 | G13B_A | K17B_A | L23B_R | T2B_A  | 1.8E-06 | 4.9E-06 | 3.715E-06 | 8.707E-07 |
| 7394 | Y10B_A | E18B_T | G1B_R  | Q14B_A | 1.6E-06 | 5.9E-06 | 3.715E-06 | 1.255E-06 |
| 7395 | Y10B_A | E18B_A | K17B_A | V24B_T | 2.6E-06 | 5.5E-06 | 3.715E-06 | 8.512E-07 |
| 7396 | G13B_A | K17B_A | E12B_A | G1B_A  | 1.9E-06 | 5.1E-06 | 3.715E-06 | 7.235E-07 |
| 7397 | G13B_A | A16B_N | G1B_R  | T2B_A  | 1.2E-06 | 6.8E-06 | 3.720E-06 | 1.554E-06 |
| 7398 | Y10B_A | G13B_W | L11B_A | Q14B_A | 2.0E-06 | 5.2E-06 | 3.720E-06 | 9.817E-07 |
| 7399 | Y10B_A | L11B_A | S5B_A  | F19B_W | 1.9E-06 | 6.5E-06 | 3.720E-06 | 1.372E-06 |
| 7400 | G13B_A | D6B_A  | L11B_A | F19B_A | 2.2E-06 | 6.6E-06 | 3.720E-06 | 1.222E-06 |
| 7401 | Y10B_A | E18B_T | S5B_A  | F19B_A | 1.8E-06 | 7.4E-06 | 3.725E-06 | 1.271E-06 |
| 7402 | Y10B_A | G13B_W | E18B_A | Q14B_A | 1.9E-06 | 4.8E-06 | 3.725E-06 | 6.719E-07 |
| 7403 | Y10B_A | T4B_A  | V24B_T | Q14B_A | 2.3E-06 | 6.0E-06 | 3.725E-06 | 9.101E-07 |
| 7404 | G13B_A | E18B_T | S5B_A  | Q14B_A | 2.1E-06 | 6.3E-06 | 3.730E-06 | 1.217E-06 |
| 7405 | Y10B_A | S9B_A  | T2B_A  | G1B_A  | 2.4E-06 | 6.6E-06 | 3.730E-06 | 1.123E-06 |
| 7406 | S8B_A  | G13B_W | L11B_A | Q14B_A | 2.3E-06 | 5.2E-06 | 3.730E-06 | 7.685E-07 |
| 7407 | G13B_A | F19B_W | T4B_A  | Q14B_A | 1.9E-06 | 5.9E-06 | 3.730E-06 | 1.040E-06 |
| 7408 | G13B_A | D6B_A  | V7B_A  | E18B_A | 2.3E-06 | 6.6E-06 | 3.735E-06 | 9.511E-07 |
| 7409 | Y10B_A | L11B_A | T4B_A  | E12B_A | 1.6E-06 | 6.4E-06 | 3.735E-06 | 9.516E-07 |
| 7410 | Y10B_A | E18B_T | F19B_A | T2B_A  | 2.0E-06 | 8.7E-06 | 3.735E-06 | 1.560E-06 |
| 7411 | Y10B_A | A16B_N | K17B_A | V24B_T | 1.4E-06 | 6.4E-06 | 3.735E-06 | 1.116E-06 |
| 7412 | Y10B_A | K17B_A | F19B_W | E12B_A | 2.1E-06 | 8.0E-06 | 3.735E-06 | 1.337E-06 |
| 7413 | Y10B_A | S8B_A  | D6B_A  | G13B_W | 2.0E-06 | 5.9E-06 | 3.740E-06 | 9.907E-07 |
| 7414 | G13B_A | S8B_A  | E18B_T | Q14B_A | 2.1E-06 | 5.7E-06 | 3.740E-06 | 9.265E-07 |
| 7415 | Y10B_A | G1B_R  | F19B_W | T2B_A  | 1.8E-06 | 6.4E-06 | 3.745E-06 | 1.182E-06 |
| 7416 | G13B_A | S8B_A  | L11B_A | G1B_R  | 2.2E-06 | 5.1E-06 | 3.745E-06 | 8.727E-07 |
| 7417 | G13B_A | T4B_A  | T2B_A  | E12B_A | 1.9E-06 | 4.9E-06 | 3.745E-06 | 7.265E-07 |
| 7418 | G13B_A | L11B_A | K17B_A | F19B_W | 2.2E-06 | 7.2E-06 | 3.745E-06 | 1.201E-06 |
| 7419 | G13B_A | F3B_A  | S5B_A  | F19B_A | 2.2E-06 | 6.2E-06 | 3.745E-06 | 1.051E-06 |
| 7420 | G13B_A | G1B_R  | S5B_A  | F19B_A | 2.6E-06 | 7.1E-06 | 3.750E-06 | 1.183E-06 |
| 7421 | Y10B_A | K17B_A | Q14B_A | V24B_N | 2.2E-06 | 4.9E-06 | 3.750E-06 | 7.864E-07 |
| 7422 | G13B_A | D6B_A  | T2B_A  | E12B_A | 2.9E-06 | 5.5E-06 | 3.750E-06 | 7.037E-07 |
| 7423 | S8B_A  | G13B_W | S5B_A  | G1B_A  | 2.2E-06 | 6.4E-06 | 3.750E-06 | 1.058E-06 |
| 7424 | Y10B_A | S8B_A  | E18B_T | L11B_A | 2.3E-06 | 7.7E-06 | 3.750E-06 | 1.257E-06 |
| 7425 | Y10B_A | E18B_T | T2B_A  | G1B_A  | 1.8E-06 | 6.6E-06 | 3.755E-06 | 1.051E-06 |
| 7426 | G13B_A | Y10B_A | E18B_A | E12B_A | 2.5E-06 | 6.5E-06 | 3.755E-06 | 8.988E-07 |
| 7427 | Y10B_A | E18B_A | K17B_S | Q14B_A | 2.6E-06 | 5.2E-06 | 3.755E-06 | 8.445E-07 |
| 7428 | S8B_A  | G13B_W | A16B_N | T4B_A  | 1.3E-06 | 5.5E-06 | 3.755E-06 | 1.217E-06 |
| 7429 | Y10B_A | D6B_A  | G13B_W | S5B_A  | 2.5E-06 | 5.3E-06 | 3.755E-06 | 7.591E-07 |
| 7430 | Y10B_A | D6B_A  | K17B_A | V24B_T | 2.9E-06 | 4.9E-06 | 3.760E-06 | 6.739E-07 |
| 7431 | G13B_A | S8B_A  | V7B_A  | G1B_R  | 2.3E-06 | 5.5E-06 | 3.760E-06 | 8.217E-07 |
| 7432 | G13B_A | E18B_T | T4B_A  | Q14B_A | 2.4E-06 | 7.0E-06 | 3.760E-06 | 1.195E-06 |
| 7433 | Y10B_A | S5B_A  | L23B_R | T2B_A  | 1.8E-06 | 6.0E-06 | 3.765E-06 | 1.009E-06 |
| 7434 | Y10B_A | S8B_A  | T4B_A  | F19B_Q | 1.9E-06 | 5.9E-06 | 3.765E-06 | 1.093E-06 |
| 7435 | Y10B_A | S8B_A  | G13B_W | E18B_A | 2.5E-06 | 6.3E-06 | 3.770E-06 | 8.998E-07 |



|      |        |        |        |        |         |         |           |           |
|------|--------|--------|--------|--------|---------|---------|-----------|-----------|
| 7436 | Y10B_A | G13B_W | V7B_A  | T4B_A  | 2.3E-06 | 6.1E-06 | 3.770E-06 | 8.909E-07 |
| 7437 | G13B_A | D6B_A  | A16B_N | F19B_A | 2.3E-06 | 6.6E-06 | 3.770E-06 | 1.187E-06 |
| 7438 | Y10B_A | S8B_A  | V7B_A  | S9B_A  | 2.8E-06 | 5.6E-06 | 3.770E-06 | 6.586E-07 |
| 7439 | Y10B_A | S8B_A  | F3B_A  | S9B_A  | 2.4E-06 | 5.4E-06 | 3.775E-06 | 7.461E-07 |
| 7440 | G13B_A | S8B_A  | F19B_W | T2B_A  | 2.2E-06 | 5.9E-06 | 3.775E-06 | 9.947E-07 |
| 7441 | G13B_A | V7B_A  | G1B_R  | S5B_A  | 2.8E-06 | 7.9E-06 | 3.775E-06 | 1.087E-06 |
| 7442 | G13B_A | S5B_A  | S9B_A  | Q14B_A | 2.4E-06 | 5.4E-06 | 3.775E-06 | 8.322E-07 |
| 7443 | G13B_A | G1B_R  | F19B_A | Q14B_A | 2.5E-06 | 6.1E-06 | 3.780E-06 | 9.128E-07 |
| 7444 | G13B_A | Y10B_A | S9B_A  | Q14B_A | 2.8E-06 | 5.4E-06 | 3.780E-06 | 7.885E-07 |
| 7445 | Y10B_A | S5B_A  | T4B_A  | L23B_R | 2.4E-06 | 5.7E-06 | 3.780E-06 | 9.780E-07 |
| 7446 | Y10B_A | E18B_A | T4B_A  | K17B_S | 2.0E-06 | 5.5E-06 | 3.780E-06 | 1.059E-06 |
| 7447 | Y10B_A | S5B_A  | F19B_Q | Q14B_A | 2.0E-06 | 7.3E-06 | 3.780E-06 | 1.481E-06 |
| 7448 | S8B_A  | G13B_W | V7B_A  | T4B_A  | 1.7E-06 | 8.1E-06 | 3.785E-06 | 1.278E-06 |
| 7449 | S8B_A  | D6B_A  | E18B_T | S5B_A  | 1.9E-06 | 6.8E-06 | 3.785E-06 | 1.144E-06 |
| 7450 | S8B_A  | G13B_W | A16B_N | Q14B_A | 9.6E-07 | 6.5E-06 | 3.788E-06 | 1.567E-06 |
| 7451 | Y10B_A | G13B_W | A16B_N | T4B_A  | 9.7E-07 | 6.8E-06 | 3.789E-06 | 1.658E-06 |
| 7452 | G13B_A | G1B_R  | K17B_A | E12B_A | 2.4E-06 | 5.6E-06 | 3.790E-06 | 8.233E-07 |
| 7453 | S8B_A  | D6B_A  | S5B_A  | F19B_W | 2.0E-06 | 7.4E-06 | 3.790E-06 | 1.546E-06 |
| 7454 | G13B_A | F3B_A  | L11B_A | E18B_A | 2.3E-06 | 6.1E-06 | 3.790E-06 | 1.064E-06 |
| 7455 | G13B_A | S8B_A  | A16B_N | G1B_R  | 1.2E-06 | 6.1E-06 | 3.790E-06 | 1.282E-06 |
| 7456 | Y10B_A | E18B_T | L11B_A | S5B_A  | 2.1E-06 | 4.8E-06 | 3.790E-06 | 8.091E-07 |
| 7457 | Y10B_A | G13B_W | G1B_R  | T2B_A  | 2.2E-06 | 6.0E-06 | 3.790E-06 | 1.066E-06 |
| 7458 | Y10B_A | A16B_N | F19B_W | T2B_A  | 6.7E-07 | 8.1E-06 | 3.793E-06 | 1.952E-06 |
| 7459 | Y10B_A | A16B_N | E18B_T | S5B_A  | 1.2E-06 | 5.3E-06 | 3.795E-06 | 1.217E-06 |
| 7460 | G13B_A | V7B_A  | A16B_N | T4B_A  | 1.4E-06 | 8.0E-06 | 3.795E-06 | 1.662E-06 |
| 7461 | Y10B_A | S8B_A  | G13B_W | L11B_A | 2.3E-06 | 6.9E-06 | 3.795E-06 | 1.123E-06 |
| 7462 | Y10B_A | G1B_R  | S5B_A  | F19B_W | 2.2E-06 | 7.1E-06 | 3.800E-06 | 1.198E-06 |
| 7463 | Y10B_A | D6B_A  | E12B_A | G1B_A  | 2.5E-06 | 7.1E-06 | 3.800E-06 | 1.073E-06 |
| 7464 | Y10B_A | S8B_A  | G13B_W | V7B_A  | 2.2E-06 | 6.2E-06 | 3.800E-06 | 9.108E-07 |
| 7465 | Y10B_A | S5B_A  | T4B_A  | F19B_Q | 2.3E-06 | 7.7E-06 | 3.800E-06 | 1.557E-06 |
| 7466 | G13B_A | K17B_A | V24B_T | T2B_A  | 2.0E-06 | 5.9E-06 | 3.800E-06 | 9.984E-07 |
| 7467 | Y10B_A | S8B_A  | G13B_W | G1B_A  | 1.9E-06 | 7.3E-06 | 3.800E-06 | 1.293E-06 |
| 7468 | Y10B_A | S8B_A  | D6B_A  | K17B_S | 2.0E-06 | 6.1E-06 | 3.800E-06 | 1.296E-06 |
| 7469 | S8B_A  | G13B_W | E18B_A | T2B_A  | 2.1E-06 | 7.8E-06 | 3.805E-06 | 1.189E-06 |
| 7470 | S8B_A  | D6B_A  | E18B_A | E12B_A | 1.8E-06 | 6.2E-06 | 3.805E-06 | 1.205E-06 |
| 7471 | G13B_A | F3B_A  | F19B_A | G1B_A  | 1.9E-06 | 7.2E-06 | 3.805E-06 | 1.499E-06 |
| 7472 | G13B_A | Y10B_A | E18B_T | Q14B_A | 2.4E-06 | 6.6E-06 | 3.805E-06 | 1.139E-06 |
| 7473 | Y10B_A | D6B_A  | G13B_W | Q14B_A | 2.1E-06 | 5.6E-06 | 3.805E-06 | 9.288E-07 |
| 7474 | Y10B_A | D6B_A  | F19B_A | G1B_A  | 2.4E-06 | 5.4E-06 | 3.810E-06 | 8.058E-07 |
| 7475 | Y10B_A | G13B_W | V7B_A  | S5B_A  | 2.7E-06 | 6.4E-06 | 3.810E-06 | 9.575E-07 |
| 7476 | Y10B_A | S8B_A  | F3B_A  | E18B_T | 2.0E-06 | 7.4E-06 | 3.810E-06 | 1.578E-06 |
| 7477 | Y10B_A | D6B_A  | E18B_T | Q14B_A | 2.6E-06 | 5.2E-06 | 3.810E-06 | 8.902E-07 |
| 7478 | Y10B_A | D6B_A  | A16B_N | E12B_A | 8.7E-07 | 6.5E-06 | 3.814E-06 | 1.639E-06 |
| 7479 | Y10B_A | G1B_R  | S5B_A  | E12B_A | 2.3E-06 | 5.6E-06 | 3.815E-06 | 7.869E-07 |
| 7480 | G13B_A | S8B_A  | T4B_A  | E12B_A | 2.3E-06 | 8.3E-06 | 3.815E-06 | 1.322E-06 |
| 7481 | Y10B_A | K17B_A | L23B_R | F19B_A | 1.5E-06 | 6.9E-06 | 3.815E-06 | 1.325E-06 |
| 7482 | G13B_A | S5B_A  | F19B_A | G1B_A  | 3.1E-06 | 5.0E-06 | 3.815E-06 | 5.163E-07 |
| 7483 | G13B_A | Y10B_A | L11B_A | G1B_R  | 2.4E-06 | 5.5E-06 | 3.815E-06 | 9.349E-07 |
| 7484 | G13B_A | A16B_N | K17B_A | F19B_W | 2.0E-06 | 7.3E-06 | 3.820E-06 | 1.431E-06 |
| 7485 | Y10B_A | S8B_A  | L23B_Q | Q14B_A | 1.7E-06 | 5.7E-06 | 3.820E-06 | 9.758E-07 |
| 7486 | Y10B_A | L11B_A | F19B_W | Q14B_A | 2.9E-06 | 5.8E-06 | 3.820E-06 | 8.594E-07 |
| 7487 | G13B_A | S5B_A  | T4B_A  | S9B_A  | 2.7E-06 | 5.1E-06 | 3.825E-06 | 7.405E-07 |

|      |        |        |        |        |         |         |           |           |
|------|--------|--------|--------|--------|---------|---------|-----------|-----------|
| 7488 | Y10B_A | G1B_R  | T4B_A  | E12B_A | 2.8E-06 | 5.1E-06 | 3.825E-06 | 5.628E-07 |
| 7489 | Y10B_A | V7B_A  | L11B_A | G1B_A  | 2.1E-06 | 6.1E-06 | 3.825E-06 | 8.967E-07 |
| 7490 | G13B_A | S8B_A  | F19B_W | Q14B_A | 2.1E-06 | 1.0E-05 | 3.825E-06 | 1.867E-06 |
| 7491 | Y10B_A | A16B_N | E18B_T | T2B_A  | 6.9E-07 | 8.2E-06 | 3.829E-06 | 1.835E-06 |
| 7492 | Y10B_A | S5B_A  | S9B_A  | F19B_A | 2.6E-06 | 5.6E-06 | 3.830E-06 | 8.797E-07 |
| 7493 | Y10B_A | T4B_A  | L23B_R | T2B_A  | 2.1E-06 | 7.4E-06 | 3.830E-06 | 1.353E-06 |
| 7494 | G13B_A | V7B_A  | G1B_R  | T2B_A  | 2.4E-06 | 5.7E-06 | 3.835E-06 | 9.074E-07 |
| 7495 | G13B_A | T4B_A  | S9B_A  | T2B_A  | 2.4E-06 | 6.3E-06 | 3.835E-06 | 9.405E-07 |
| 7496 | G13B_A | E18B_A | F19B_W | Q14B_A | 2.1E-06 | 6.9E-06 | 3.835E-06 | 1.155E-06 |
| 7497 | Y10B_A | G13B_W | F3B_A  | Q14B_A | 2.3E-06 | 6.1E-06 | 3.835E-06 | 9.604E-07 |
| 7498 | G13B_A | D6B_A  | A16B_N | T2B_A  | 1.0E-06 | 6.5E-06 | 3.840E-06 | 1.915E-06 |
| 7499 | G13B_A | E18B_A | K17B_A | F19B_W | 2.1E-06 | 6.9E-06 | 3.845E-06 | 1.051E-06 |
| 7500 | Y10B_A | G13B_W | T4B_A  | F19B_A | 2.1E-06 | 5.2E-06 | 3.845E-06 | 8.432E-07 |
| 7501 | G13B_A | Y10B_A | S8B_A  | S9B_A  | 2.4E-06 | 5.7E-06 | 3.845E-06 | 7.997E-07 |
| 7502 | Y10B_A | V7B_A  | T4B_A  | S9B_A  | 2.7E-06 | 5.6E-06 | 3.845E-06 | 7.937E-07 |
| 7503 | Y10B_A | S8B_A  | D6B_A  | E18B_T | 1.9E-06 | 6.0E-06 | 3.845E-06 | 1.122E-06 |
| 7504 | S8B_A  | D6B_A  | S9B_A  | T2B_A  | 2.2E-06 | 5.7E-06 | 3.845E-06 | 9.795E-07 |
| 7505 | Y10B_A | E18B_A | S5B_A  | K17B_S | 2.3E-06 | 7.9E-06 | 3.845E-06 | 1.384E-06 |
| 7506 | Y10B_A | S8B_A  | F3B_A  | K17B_S | 1.9E-06 | 5.6E-06 | 3.845E-06 | 1.146E-06 |
| 7507 | S8B_A  | D6B_A  | K17B_S | T2B_A  | 2.2E-06 | 6.1E-06 | 3.850E-06 | 9.299E-07 |
| 7508 | G13B_A | S8B_A  | F19B_Q | T2B_A  | 1.7E-06 | 9.5E-06 | 3.850E-06 | 1.815E-06 |
| 7509 | G13B_A | A16B_N | K17B_A | E12B_A | 1.0E-06 | 7.6E-06 | 3.850E-06 | 2.150E-06 |
| 7510 | Y10B_A | S5B_A  | L23B_R | Q14B_A | 2.1E-06 | 7.9E-06 | 3.850E-06 | 1.385E-06 |
| 7511 | Y10B_A | K17B_A | T2B_A  | V24B_N | 1.9E-06 | 5.7E-06 | 3.855E-06 | 1.026E-06 |
| 7512 | S8B_A  | G13B_W | F3B_A  | T4B_A  | 2.7E-06 | 5.5E-06 | 3.855E-06 | 8.906E-07 |
| 7513 | G13B_A | F3B_A  | A16B_N | Q14B_A | 7.9E-07 | 8.6E-06 | 3.860E-06 | 2.199E-06 |
| 7514 | G13B_A | S5B_A  | F19B_W | T4B_A  | 1.9E-06 | 6.1E-06 | 3.860E-06 | 1.049E-06 |
| 7515 | G13B_A | L11B_A | G1B_R  | T2B_A  | 2.2E-06 | 5.5E-06 | 3.860E-06 | 9.202E-07 |
| 7516 | Y10B_A | D6B_A  | T2B_A  | E12B_A | 2.4E-06 | 5.3E-06 | 3.860E-06 | 7.155E-07 |
| 7517 | Y10B_A | K17B_S | Q14B_A | G1B_A  | 2.3E-06 | 7.4E-06 | 3.865E-06 | 1.103E-06 |
| 7518 | G13B_A | K17B_A | F19B_Q | T2B_A  | 1.9E-06 | 7.7E-06 | 3.865E-06 | 1.456E-06 |
| 7519 | G13B_A | D6B_A  | E18B_A | G1B_A  | 2.5E-06 | 4.8E-06 | 3.865E-06 | 6.846E-07 |
| 7520 | Y10B_A | V7B_A  | G1B_R  | F19B_A | 2.9E-06 | 5.2E-06 | 3.865E-06 | 7.534E-07 |
| 7521 | G13B_A | S8B_A  | S9B_A  | T2B_A  | 2.5E-06 | 5.3E-06 | 3.865E-06 | 6.907E-07 |
| 7522 | Y10B_A | A16B_N | G1B_R  | F19B_A | 9.7E-07 | 8.4E-06 | 3.868E-06 | 1.670E-06 |
| 7523 | S8B_A  | D6B_A  | G13B_W | T4B_A  | 2.4E-06 | 5.3E-06 | 3.870E-06 | 8.411E-07 |
| 7524 | G13B_A | V7B_A  | A16B_N | G1B_A  | 2.2E-06 | 5.8E-06 | 3.870E-06 | 9.750E-07 |
| 7525 | G13B_A | A16B_N | L11B_A | T2B_A  | 1.0E-06 | 6.9E-06 | 3.870E-06 | 1.526E-06 |
| 7526 | Y10B_A | E18B_A | F19B_W | T2B_A  | 1.4E-06 | 7.8E-06 | 3.875E-06 | 1.610E-06 |
| 7527 | S8B_A  | G13B_W | E18B_A | T4B_A  | 2.3E-06 | 5.9E-06 | 3.875E-06 | 8.328E-07 |
| 7528 | G13B_A | Y10B_A | S9B_A  | T2B_A  | 2.5E-06 | 6.3E-06 | 3.880E-06 | 1.142E-06 |
| 7529 | Y10B_A | T4B_A  | S9B_A  | G1B_A  | 2.2E-06 | 6.0E-06 | 3.880E-06 | 1.009E-06 |
| 7530 | Y10B_A | S8B_A  | L11B_A | S9B_A  | 2.8E-06 | 5.4E-06 | 3.885E-06 | 7.673E-07 |
| 7531 | Y10B_A | S5B_A  | F19B_A | E12B_A | 2.3E-06 | 6.1E-06 | 3.885E-06 | 1.159E-06 |
| 7532 | G13B_A | S8B_A  | F3B_A  | F19B_A | 2.6E-06 | 5.6E-06 | 3.885E-06 | 7.949E-07 |
| 7533 | G13B_A | V7B_A  | A16B_N | E18B_A | 1.1E-06 | 5.9E-06 | 3.885E-06 | 1.384E-06 |
| 7534 | Y10B_A | S5B_A  | S9B_A  | G1B_A  | 2.5E-06 | 8.7E-06 | 3.890E-06 | 1.359E-06 |
| 7535 | G13B_A | G1B_R  | T4B_A  | F19B_A | 2.6E-06 | 6.1E-06 | 3.895E-06 | 9.644E-07 |
| 7536 | Y10B_A | G13B_W | V7B_A  | T2B_A  | 2.5E-06 | 5.9E-06 | 3.895E-06 | 8.678E-07 |
| 7537 | Y10B_A | E18B_T | L11B_A | T4B_A  | 1.9E-06 | 6.6E-06 | 3.895E-06 | 1.147E-06 |
| 7538 | Y10B_A | S9B_A  | F19B_A | T2B_A  | 2.3E-06 | 5.4E-06 | 3.895E-06 | 9.099E-07 |
| 7539 | Y10B_A | V7B_A  | S5B_A  | F19B_W | 2.5E-06 | 6.1E-06 | 3.895E-06 | 1.111E-06 |

|      |        |        |        |        |         |         |           |           |
|------|--------|--------|--------|--------|---------|---------|-----------|-----------|
| 7540 | S8B_A  | D6B_A  | K17B_A | L23B_R | 2.7E-06 | 7.5E-06 | 3.900E-06 | 1.222E-06 |
| 7541 | Y10B_A | G1B_R  | F19B_W | T4B_A  | 2.3E-06 | 8.2E-06 | 3.900E-06 | 1.380E-06 |
| 7542 | S8B_A  | G13B_W | E18B_A | S5B_A  | 2.2E-06 | 5.9E-06 | 3.900E-06 | 9.674E-07 |
| 7543 | Y10B_A | S8B_A  | E18B_T | F19B_A | 2.4E-06 | 8.6E-06 | 3.900E-06 | 1.486E-06 |
| 7544 | Y10B_A | A16B_N | F19B_W | T4B_A  | 9.7E-07 | 9.0E-06 | 3.903E-06 | 2.083E-06 |
| 7545 | G13B_A | Y10B_A | F3B_A  | L11B_A | 1.6E-06 | 6.5E-06 | 3.905E-06 | 1.121E-06 |
| 7546 | Y10B_A | S8B_A  | V7B_A  | E12B_A | 2.7E-06 | 6.4E-06 | 3.905E-06 | 8.438E-07 |
| 7547 | Y10B_A | S5B_A  | F19B_W | G1B_A  | 1.5E-06 | 6.1E-06 | 3.905E-06 | 1.335E-06 |
| 7548 | Y10B_A | S8B_A  | V24B_Q | Q14B_A | 2.4E-06 | 6.3E-06 | 3.905E-06 | 9.545E-07 |
| 7549 | Y10B_A | G13B_W | A16B_N | Q14B_A | 8.6E-07 | 6.8E-06 | 3.908E-06 | 1.437E-06 |
| 7550 | G13B_A | F3B_A  | G1B_R  | S5B_A  | 2.3E-06 | 5.7E-06 | 3.910E-06 | 8.657E-07 |
| 7551 | G13B_A | S8B_A  | A16B_N | E18B_A | 1.3E-06 | 6.6E-06 | 3.910E-06 | 1.376E-06 |
| 7552 | Y10B_A | F19B_W | T4B_A  | G1B_A  | 2.3E-06 | 8.2E-06 | 3.910E-06 | 1.306E-06 |
| 7553 | Y10B_A | S8B_A  | S9B_A  | F19B_A | 1.9E-06 | 6.3E-06 | 3.910E-06 | 1.165E-06 |
| 7554 | G13B_A | F19B_W | T4B_A  | T2B_A  | 1.9E-06 | 7.2E-06 | 3.915E-06 | 1.213E-06 |
| 7555 | G13B_A | A16B_N | T2B_A  | G1B_A  | 1.2E-06 | 6.5E-06 | 3.915E-06 | 1.588E-06 |
| 7556 | Y10B_A | L23B_R | Q14B_A | T2B_A  | 2.2E-06 | 6.6E-06 | 3.915E-06 | 1.239E-06 |
| 7557 | S8B_A  | D6B_A  | K17B_A | F19B_Q | 1.8E-06 | 8.0E-06 | 3.920E-06 | 1.658E-06 |
| 7558 | Y10B_A | F3B_A  | S5B_A  | S9B_A  | 2.5E-06 | 5.6E-06 | 3.920E-06 | 9.345E-07 |
| 7559 | S8B_A  | V7B_A  | A16B_N | G1B_R  | 1.5E-06 | 6.8E-06 | 3.925E-06 | 1.436E-06 |
| 7560 | S8B_A  | V7B_A  | A16B_N | F19B_A | 1.7E-06 | 8.2E-06 | 3.925E-06 | 1.543E-06 |
| 7561 | Y10B_A | A16B_N | T2B_A  | E12B_A | 1.1E-06 | 6.4E-06 | 3.925E-06 | 1.574E-06 |
| 7562 | Y10B_A | V7B_A  | L11B_A | G1B_R  | 2.6E-06 | 6.6E-06 | 3.930E-06 | 8.992E-07 |
| 7563 | G13B_A | S5B_A  | K17B_A | L23B_R | 2.3E-06 | 6.4E-06 | 3.930E-06 | 9.788E-07 |
| 7564 | Y10B_A | S8B_A  | G1B_R  | F19B_W | 2.1E-06 | 6.0E-06 | 3.930E-06 | 1.121E-06 |
| 7565 | Y10B_A | A16B_N | S9B_A  | Q14B_A | 1.4E-06 | 6.0E-06 | 3.930E-06 | 1.133E-06 |
| 7566 | G13B_A | F3B_A  | K17B_A | E12B_A | 2.6E-06 | 5.5E-06 | 3.930E-06 | 8.355E-07 |
| 7567 | Y10B_A | D6B_A  | A16B_N | G1B_A  | 1.5E-06 | 6.7E-06 | 3.930E-06 | 1.454E-06 |
| 7568 | G13B_A | K17B_A | F19B_W | G1B_A  | 2.3E-06 | 1.0E-05 | 3.930E-06 | 1.829E-06 |
| 7569 | Y10B_A | D6B_A  | S9B_A  | T2B_A  | 2.4E-06 | 4.9E-06 | 3.935E-06 | 8.499E-07 |
| 7570 | Y10B_A | G13B_W | G1B_R  | K17B_A | 2.6E-06 | 5.4E-06 | 3.935E-06 | 7.066E-07 |
| 7571 | Y10B_A | A16B_N | T4B_A  | K17B_S | 1.3E-06 | 6.7E-06 | 3.940E-06 | 1.387E-06 |
| 7572 | G13B_A | E18B_T | S5B_A  | T2B_A  | 2.0E-06 | 7.7E-06 | 3.940E-06 | 1.747E-06 |
| 7573 | G13B_A | V7B_A  | K17B_A | F19B_W | 1.9E-06 | 7.5E-06 | 3.945E-06 | 1.458E-06 |
| 7574 | G13B_A | S5B_A  | T4B_A  | K17B_S | 1.9E-06 | 8.3E-06 | 3.945E-06 | 1.382E-06 |
| 7575 | S8B_A  | D6B_A  | V7B_A  | A16B_N | 1.3E-06 | 8.3E-06 | 3.945E-06 | 2.050E-06 |
| 7576 | Y10B_A | A16B_N | K17B_A | F19B_Q | 6.8E-07 | 7.3E-06 | 3.949E-06 | 2.077E-06 |
| 7577 | Y10B_A | F3B_A  | L11B_A | G1B_R  | 2.7E-06 | 5.7E-06 | 3.955E-06 | 8.192E-07 |
| 7578 | G13B_A | K17B_A | F19B_A | E12B_A | 2.5E-06 | 6.2E-06 | 3.955E-06 | 1.125E-06 |
| 7579 | S8B_A  | D6B_A  | E18B_T | T4B_A  | 2.6E-06 | 5.2E-06 | 3.960E-06 | 8.647E-07 |
| 7580 | G13B_A | A16B_N | L11B_A | E18B_A | 1.5E-06 | 6.6E-06 | 3.960E-06 | 1.331E-06 |
| 7581 | S8B_A  | G13B_W | F3B_A  | Q14B_A | 2.4E-06 | 6.1E-06 | 3.960E-06 | 9.276E-07 |
| 7582 | G13B_A | S9B_A  | Q14B_A | T2B_A  | 2.8E-06 | 6.6E-06 | 3.960E-06 | 8.236E-07 |
| 7583 | Y10B_A | K17B_A | T4B_A  | V24B_Q | 2.3E-06 | 6.4E-06 | 3.965E-06 | 1.030E-06 |
| 7584 | Y10B_A | S5B_A  | V24B_Q | T2B_A  | 2.5E-06 | 6.6E-06 | 3.965E-06 | 1.069E-06 |
| 7585 | Y10B_A | V7B_A  | L11B_A | F19B_A | 2.5E-06 | 5.6E-06 | 3.965E-06 | 8.750E-07 |
| 7586 | Y10B_A | L11B_A | S9B_A  | Q14B_A | 2.1E-06 | 5.6E-06 | 3.965E-06 | 9.455E-07 |
| 7587 | G13B_A | S5B_A  | Q14B_A | E12B_A | 3.0E-06 | 4.9E-06 | 3.970E-06 | 6.148E-07 |
| 7588 | G13B_A | S8B_A  | V7B_A  | F19B_A | 2.3E-06 | 6.5E-06 | 3.970E-06 | 1.180E-06 |
| 7589 | G13B_A | E18B_A | Q14B_A | G1B_A  | 2.4E-06 | 6.0E-06 | 3.975E-06 | 7.426E-07 |
| 7590 | Y10B_A | S8B_A  | F3B_A  | E12B_A | 2.7E-06 | 6.1E-06 | 3.975E-06 | 8.239E-07 |
| 7591 | Y10B_A | T4B_A  | K17B_S | G1B_A  | 2.2E-06 | 6.3E-06 | 3.975E-06 | 1.177E-06 |

|      |        |        |        |        |         |         |           |           |
|------|--------|--------|--------|--------|---------|---------|-----------|-----------|
| 7592 | G13B_A | L11B_A | K17B_A | E12B_A | 3.0E-06 | 5.8E-06 | 3.975E-06 | 7.566E-07 |
| 7593 | G13B_A | F3B_A  | T2B_A  | G1B_A  | 2.3E-06 | 5.2E-06 | 3.975E-06 | 7.656E-07 |
| 7594 | Y10B_A | D6B_A  | F19B_W | Q14B_A | 2.4E-06 | 6.6E-06 | 3.975E-06 | 9.760E-07 |
| 7595 | Y10B_A | F3B_A  | E18B_A | G1B_R  | 2.3E-06 | 5.9E-06 | 3.980E-06 | 8.364E-07 |
| 7596 | Y10B_A | F3B_A  | T4B_A  | E12B_A | 2.6E-06 | 6.0E-06 | 3.980E-06 | 7.931E-07 |
| 7597 | S8B_A  | D6B_A  | L11B_A | G1B_R  | 2.8E-06 | 5.2E-06 | 3.980E-06 | 6.764E-07 |
| 7598 | G13B_A | D6B_A  | F3B_A  | E18B_A | 2.7E-06 | 5.7E-06 | 3.980E-06 | 8.764E-07 |
| 7599 | S8B_A  | D6B_A  | A16B_N | G1B_R  | 6.7E-07 | 8.0E-06 | 3.984E-06 | 2.085E-06 |
| 7600 | Y10B_A | D6B_A  | L11B_A | G1B_R  | 2.6E-06 | 5.8E-06 | 3.985E-06 | 8.987E-07 |
| 7601 | G13B_A | E18B_A | G1B_R  | Q14B_A | 3.2E-06 | 5.2E-06 | 3.985E-06 | 5.696E-07 |
| 7602 | G13B_A | S8B_A  | S5B_A  | F19B_W | 1.3E-06 | 6.2E-06 | 3.990E-06 | 1.028E-06 |
| 7603 | Y10B_A | L11B_A | S9B_A  | T2B_A  | 2.3E-06 | 7.4E-06 | 3.990E-06 | 1.139E-06 |
| 7604 | Y10B_A | E18B_A | S9B_A  | Q14B_A | 1.7E-06 | 6.4E-06 | 3.990E-06 | 1.210E-06 |
| 7605 | Y10B_A | D6B_A  | E18B_T | S5B_A  | 1.4E-06 | 7.1E-06 | 3.990E-06 | 1.216E-06 |
| 7606 | G13B_A | Y10B_A | D6B_A  | A16B_N | 1.2E-06 | 6.3E-06 | 3.995E-06 | 1.819E-06 |
| 7607 | G13B_A | S8B_A  | T2B_A  | E12B_A | 3.0E-06 | 5.8E-06 | 3.995E-06 | 7.584E-07 |
| 7608 | G13B_A | F3B_A  | G1B_R  | T2B_A  | 2.3E-06 | 6.0E-06 | 3.995E-06 | 9.456E-07 |
| 7609 | Y10B_A | G13B_W | L11B_A | T2B_A  | 2.4E-06 | 6.9E-06 | 3.995E-06 | 9.997E-07 |
| 7610 | S8B_A  | D6B_A  | S5B_A  | S9B_A  | 2.7E-06 | 7.1E-06 | 3.995E-06 | 1.018E-06 |
| 7611 | G13B_A | S8B_A  | V7B_A  | A16B_N | 9.7E-07 | 6.2E-06 | 3.999E-06 | 1.546E-06 |
| 7612 | Y10B_A | F3B_A  | S5B_A  | F19B_W | 2.2E-06 | 5.5E-06 | 4.000E-06 | 8.956E-07 |
| 7613 | Y10B_A | S5B_A  | K17B_A | V24B_N | 2.2E-06 | 6.7E-06 | 4.000E-06 | 1.186E-06 |
| 7614 | Y10B_A | G13B_W | S5B_A  | G1B_A  | 3.1E-06 | 7.5E-06 | 4.000E-06 | 1.112E-06 |
| 7615 | G13B_A | D6B_A  | K17B_A | S9B_A  | 2.6E-06 | 6.0E-06 | 4.005E-06 | 9.654E-07 |
| 7616 | Y10B_A | L11B_A | F19B_W | T2B_A  | 2.7E-06 | 5.9E-06 | 4.005E-06 | 1.025E-06 |
| 7617 | Y10B_A | Q14B_A | E12B_A | G1B_A  | 3.0E-06 | 5.5E-06 | 4.005E-06 | 7.052E-07 |
| 7618 | G13B_A | V7B_A  | T2B_A  | G1B_A  | 2.2E-06 | 5.9E-06 | 4.005E-06 | 1.111E-06 |
| 7619 | G13B_A | S8B_A  | S5B_A  | S9B_A  | 2.8E-06 | 6.6E-06 | 4.005E-06 | 9.047E-07 |
| 7620 | G13B_A | F3B_A  | K17B_A | F19B_W | 2.2E-06 | 7.3E-06 | 4.005E-06 | 1.287E-06 |
| 7621 | G13B_A | L11B_A | T4B_A  | F19B_A | 2.8E-06 | 6.9E-06 | 4.005E-06 | 8.900E-07 |
| 7622 | G13B_A | A16B_N | L11B_A | S5B_A  | 1.7E-06 | 5.8E-06 | 4.010E-06 | 1.285E-06 |
| 7623 | Y10B_A | E18B_A | F19B_W | T4B_A  | 2.1E-06 | 6.6E-06 | 4.010E-06 | 1.075E-06 |
| 7624 | G13B_A | K17B_A | F19B_Q | Q14B_A | 2.0E-06 | 7.7E-06 | 4.015E-06 | 1.389E-06 |
| 7625 | Y10B_A | E18B_T | L11B_A | Q14B_A | 2.3E-06 | 7.4E-06 | 4.015E-06 | 1.275E-06 |
| 7626 | Y10B_A | G13B_W | S5B_A  | F19B_A | 1.6E-06 | 6.9E-06 | 4.015E-06 | 1.276E-06 |
| 7627 | G13B_A | S8B_A  | S9B_A  | Q14B_A | 3.2E-06 | 5.6E-06 | 4.015E-06 | 6.800E-07 |
| 7628 | Y10B_A | S8B_A  | V7B_A  | F19B_W | 2.2E-06 | 6.2E-06 | 4.020E-06 | 1.179E-06 |
| 7629 | G13B_A | V7B_A  | L11B_A | S5B_A  | 2.6E-06 | 6.5E-06 | 4.020E-06 | 9.288E-07 |
| 7630 | Y10B_A | S8B_A  | G13B_W | F19B_A | 2.0E-06 | 7.7E-06 | 4.020E-06 | 1.526E-06 |
| 7631 | Y10B_A | G13B_W | F3B_A  | T2B_A  | 2.3E-06 | 5.4E-06 | 4.020E-06 | 9.163E-07 |
| 7632 | Y10B_A | V7B_A  | K17B_A | L23B_R | 1.6E-06 | 6.1E-06 | 4.025E-06 | 1.137E-06 |
| 7633 | G13B_A | S5B_A  | S9B_A  | T2B_A  | 2.3E-06 | 5.6E-06 | 4.025E-06 | 9.651E-07 |
| 7634 | Y10B_A | G13B_W | A16B_N | T2B_A  | 7.9E-07 | 6.5E-06 | 4.027E-06 | 1.855E-06 |
| 7635 | Y10B_A | S8B_A  | D6B_A  | F19B_W | 2.3E-06 | 9.2E-06 | 4.030E-06 | 1.525E-06 |
| 7636 | Y10B_A | F3B_A  | A16B_N | E18B_A | 1.4E-06 | 7.0E-06 | 4.030E-06 | 1.939E-06 |
| 7637 | Y10B_A | T4B_A  | E12B_A | G1B_A  | 2.6E-06 | 5.5E-06 | 4.030E-06 | 7.747E-07 |
| 7638 | G13B_A | F3B_A  | A16B_N | T4B_A  | 9.7E-07 | 6.5E-06 | 4.033E-06 | 1.568E-06 |
| 7639 | S8B_A  | G13B_W | F3B_A  | S5B_A  | 2.7E-06 | 5.9E-06 | 4.035E-06 | 8.061E-07 |
| 7640 | Y10B_A | K17B_A | V24B_Q | Q14B_A | 1.6E-06 | 5.7E-06 | 4.040E-06 | 1.040E-06 |
| 7641 | Y10B_A | S8B_A  | G1B_R  | E12B_A | 2.1E-06 | 7.1E-06 | 4.040E-06 | 1.277E-06 |
| 7642 | S8B_A  | G13B_W | A16B_N | S5B_A  | 1.1E-06 | 8.0E-06 | 4.040E-06 | 1.679E-06 |
| 7643 | Y10B_A | S8B_A  | D6B_A  | E12B_A | 2.8E-06 | 6.5E-06 | 4.040E-06 | 8.407E-07 |

|      |        |        |        |        |         |         |           |           |
|------|--------|--------|--------|--------|---------|---------|-----------|-----------|
| 7644 | Y10B_A | V7B_A  | Q14B_A | E12B_A | 2.6E-06 | 6.7E-06 | 4.040E-06 | 1.084E-06 |
| 7645 | Y10B_A | A16B_N | L11B_A | G1B_A  | 8.6E-07 | 6.8E-06 | 4.041E-06 | 1.956E-06 |
| 7646 | G13B_A | L11B_A | G1B_R  | Q14B_A | 2.6E-06 | 5.7E-06 | 4.045E-06 | 8.672E-07 |
| 7647 | Y10B_A | D6B_A  | F19B_W | T2B_A  | 2.1E-06 | 6.6E-06 | 4.050E-06 | 1.263E-06 |
| 7648 | G13B_A | F3B_A  | E18B_A | Q14B_A | 3.0E-06 | 5.9E-06 | 4.050E-06 | 6.747E-07 |
| 7649 | G13B_A | D6B_A  | G1B_R  | T2B_A  | 3.2E-06 | 5.9E-06 | 4.050E-06 | 6.724E-07 |
| 7650 | Y10B_A | S8B_A  | F19B_Q | Q14B_A | 1.3E-06 | 8.0E-06 | 4.050E-06 | 1.500E-06 |
| 7651 | G13B_A | Y10B_A | V7B_A  | L11B_A | 2.9E-06 | 5.9E-06 | 4.050E-06 | 8.230E-07 |
| 7652 | G13B_A | V7B_A  | G1B_R  | Q14B_A | 2.6E-06 | 5.8E-06 | 4.050E-06 | 9.064E-07 |
| 7653 | Y10B_A | D6B_A  | T4B_A  | S9B_A  | 2.6E-06 | 6.0E-06 | 4.055E-06 | 9.600E-07 |
| 7654 | Y10B_A | F19B_W | T2B_A  | G1B_A  | 2.1E-06 | 6.2E-06 | 4.055E-06 | 1.195E-06 |
| 7655 | G13B_A | E18B_A | G1B_R  | T4B_A  | 2.7E-06 | 6.4E-06 | 4.055E-06 | 8.900E-07 |
| 7656 | Y10B_A | V7B_A  | F19B_W | T2B_A  | 2.0E-06 | 7.9E-06 | 4.060E-06 | 1.364E-06 |
| 7657 | Y10B_A | L11B_A | E18B_A | F19B_A | 2.3E-06 | 6.9E-06 | 4.060E-06 | 1.037E-06 |
| 7658 | Y10B_A | G1B_R  | T2B_A  | E12B_A | 2.7E-06 | 8.7E-06 | 4.060E-06 | 1.279E-06 |
| 7659 | G13B_A | L11B_A | G1B_R  | T4B_A  | 2.1E-06 | 5.7E-06 | 4.060E-06 | 1.056E-06 |
| 7660 | G13B_A | Y10B_A | F19B_W | T4B_A  | 2.3E-06 | 6.1E-06 | 4.060E-06 | 1.232E-06 |
| 7661 | Y10B_A | L11B_A | G1B_R  | F19B_A | 2.6E-06 | 6.4E-06 | 4.065E-06 | 8.530E-07 |
| 7662 | S8B_A  | D6B_A  | G13B_W | Q14B_A | 3.0E-06 | 7.4E-06 | 4.065E-06 | 1.160E-06 |
| 7663 | G13B_A | L11B_A | F19B_A | T2B_A  | 2.6E-06 | 5.9E-06 | 4.065E-06 | 9.505E-07 |
| 7664 | G13B_A | Y10B_A | S5B_A  | K17B_S | 1.9E-06 | 6.3E-06 | 4.065E-06 | 1.145E-06 |
| 7665 | Y10B_A | L11B_A | F19B_W | T4B_A  | 3.1E-06 | 6.5E-06 | 4.070E-06 | 9.114E-07 |
| 7666 | S8B_A  | G13B_W | F3B_A  | T2B_A  | 2.5E-06 | 5.5E-06 | 4.075E-06 | 8.932E-07 |
| 7667 | G13B_A | Y10B_A | A16B_N | G1B_R  | 2.5E-06 | 6.0E-06 | 4.075E-06 | 1.064E-06 |
| 7668 | G13B_A | Y10B_A | F3B_A  | G1B_A  | 2.5E-06 | 6.1E-06 | 4.075E-06 | 8.813E-07 |
| 7669 | Y10B_A | D6B_A  | S5B_A  | S9B_A  | 3.0E-06 | 5.2E-06 | 4.080E-06 | 7.053E-07 |
| 7670 | Y10B_A | F3B_A  | A16B_N | G1B_R  | 8.0E-07 | 8.4E-06 | 4.080E-06 | 1.913E-06 |
| 7671 | G13B_A | K17B_A | T4B_A  | F19B_Q | 1.5E-06 | 6.2E-06 | 4.080E-06 | 1.181E-06 |
| 7672 | Y10B_A | E18B_A | T4B_A  | E12B_A | 2.7E-06 | 5.6E-06 | 4.080E-06 | 8.588E-07 |
| 7673 | G13B_A | V7B_A  | A16B_N | T2B_A  | 1.1E-06 | 6.9E-06 | 4.085E-06 | 1.734E-06 |
| 7674 | G13B_A | E18B_A | K17B_A | E12B_A | 2.3E-06 | 7.2E-06 | 4.085E-06 | 9.821E-07 |
| 7675 | Y10B_A | A16B_N | F19B_A | G1B_A  | 1.5E-06 | 8.4E-06 | 4.085E-06 | 1.878E-06 |
| 7676 | Y10B_A | G13B_W | T2B_A  | G1B_A  | 2.7E-06 | 5.5E-06 | 4.085E-06 | 7.721E-07 |
| 7677 | Y10B_A | S8B_A  | K17B_A | V24B_T | 2.3E-06 | 5.7E-06 | 4.085E-06 | 1.060E-06 |
| 7678 | G13B_A | F3B_A  | F19B_A | Q14B_A | 2.3E-06 | 6.6E-06 | 4.095E-06 | 1.171E-06 |
| 7679 | Y10B_A | S8B_A  | K17B_A | V24B_Q | 2.2E-06 | 5.8E-06 | 4.095E-06 | 9.966E-07 |
| 7680 | Y10B_A | A16B_N | T4B_A  | E12B_A | 1.0E-06 | 7.5E-06 | 4.100E-06 | 1.924E-06 |
| 7681 | Y10B_A | S8B_A  | K17B_S | T2B_A  | 2.7E-06 | 6.4E-06 | 4.105E-06 | 9.327E-07 |
| 7682 | Y10B_A | E18B_A | K17B_A | F19B_Q | 2.0E-06 | 8.3E-06 | 4.105E-06 | 1.760E-06 |
| 7683 | Y10B_A | F3B_A  | L11B_A | G1B_A  | 2.2E-06 | 6.1E-06 | 4.105E-06 | 9.913E-07 |
| 7684 | Y10B_A | F3B_A  | F19B_A | G1B_A  | 2.7E-06 | 6.2E-06 | 4.105E-06 | 9.966E-07 |
| 7685 | G13B_A | V7B_A  | Q14B_A | G1B_A  | 2.3E-06 | 5.9E-06 | 4.105E-06 | 8.344E-07 |
| 7686 | Y10B_A | S8B_A  | E18B_A | S9B_A  | 2.2E-06 | 6.1E-06 | 4.110E-06 | 1.002E-06 |
| 7687 | Y10B_A | S8B_A  | D6B_A  | S9B_A  | 2.6E-06 | 7.5E-06 | 4.110E-06 | 1.176E-06 |
| 7688 | S8B_A  | D6B_A  | S9B_A  | Q14B_A | 1.9E-06 | 6.4E-06 | 4.110E-06 | 1.050E-06 |
| 7689 | G13B_A | S8B_A  | V7B_A  | L11B_A | 2.2E-06 | 5.5E-06 | 4.115E-06 | 8.964E-07 |
| 7690 | Y10B_A | S5B_A  | K17B_S | T2B_A  | 1.8E-06 | 6.7E-06 | 4.120E-06 | 1.296E-06 |
| 7691 | S8B_A  | D6B_A  | E18B_T | Q14B_A | 2.6E-06 | 7.4E-06 | 4.120E-06 | 1.228E-06 |
| 7692 | G13B_A | A16B_N | Q14B_A | G1B_A  | 5.7E-07 | 7.6E-06 | 4.123E-06 | 2.114E-06 |
| 7693 | Y10B_A | D6B_A  | S9B_A  | Q14B_A | 2.6E-06 | 5.8E-06 | 4.130E-06 | 8.773E-07 |
| 7694 | Y10B_A | T4B_A  | V24B_T | T2B_A  | 2.3E-06 | 6.6E-06 | 4.130E-06 | 1.211E-06 |
| 7695 | G13B_A | Y10B_A | S8B_A  | E12B_A | 3.0E-06 | 6.2E-06 | 4.130E-06 | 8.131E-07 |

|      |        |        |        |        |         |         |           |           |
|------|--------|--------|--------|--------|---------|---------|-----------|-----------|
| 7696 | S8B_A  | D6B_A  | A16B_N | G1B_A  | 1.2E-06 | 7.3E-06 | 4.130E-06 | 1.830E-06 |
| 7697 | G13B_A | D6B_A  | E18B_A | F19B_A | 2.4E-06 | 6.1E-06 | 4.135E-06 | 1.008E-06 |
| 7698 | Y10B_A | D6B_A  | E18B_T | T2B_A  | 2.1E-06 | 7.9E-06 | 4.135E-06 | 1.489E-06 |
| 7699 | Y10B_A | K17B_A | V24B_Q | T2B_A  | 2.9E-06 | 7.9E-06 | 4.135E-06 | 1.083E-06 |
| 7700 | Y10B_A | V7B_A  | T4B_A  | E12B_A | 2.9E-06 | 5.8E-06 | 4.140E-06 | 9.789E-07 |
| 7701 | G13B_A | E18B_A | S5B_A  | F19B_A | 2.4E-06 | 6.3E-06 | 4.140E-06 | 1.121E-06 |
| 7702 | G13B_A | Y10B_A | K17B_A | F19B_Q | 1.9E-06 | 7.3E-06 | 4.140E-06 | 1.496E-06 |
| 7703 | Y10B_A | F3B_A  | F19B_W | Q14B_A | 2.3E-06 | 8.5E-06 | 4.140E-06 | 1.451E-06 |
| 7704 | Y10B_A | F3B_A  | G1B_R  | F19B_A | 2.6E-06 | 6.7E-06 | 4.140E-06 | 9.891E-07 |
| 7705 | Y10B_A | T4B_A  | K17B_S | F19B_A | 2.5E-06 | 7.9E-06 | 4.145E-06 | 1.527E-06 |
| 7706 | Y10B_A | D6B_A  | G13B_W | T2B_A  | 2.8E-06 | 5.6E-06 | 4.150E-06 | 8.697E-07 |
| 7707 | Y10B_A | F3B_A  | Q14B_A | E12B_A | 2.6E-06 | 6.0E-06 | 4.155E-06 | 8.432E-07 |
| 7708 | Y10B_A | G13B_W | V7B_A  | Q14B_A | 2.3E-06 | 6.1E-06 | 4.160E-06 | 9.965E-07 |
| 7709 | G13B_A | F19B_A | Q14B_A | G1B_A  | 3.1E-06 | 8.1E-06 | 4.160E-06 | 1.275E-06 |
| 7710 | Y10B_A | S8B_A  | F19B_W | G1B_A  | 1.9E-06 | 7.5E-06 | 4.170E-06 | 1.541E-06 |
| 7711 | Y10B_A | A16B_N | S5B_A  | E12B_A | 1.5E-06 | 7.5E-06 | 4.170E-06 | 1.682E-06 |
| 7712 | Y10B_A | S8B_A  | A16B_N | E12B_A | 9.9E-07 | 8.4E-06 | 4.175E-06 | 1.980E-06 |
| 7713 | G13B_A | F3B_A  | G1B_R  | T4B_A  | 2.2E-06 | 7.9E-06 | 4.175E-06 | 1.463E-06 |
| 7714 | G13B_A | Y10B_A | G1B_R  | F19B_A | 2.9E-06 | 6.4E-06 | 4.175E-06 | 1.092E-06 |
| 7715 | S8B_A  | D6B_A  | T4B_A  | S9B_A  | 3.0E-06 | 6.4E-06 | 4.180E-06 | 8.740E-07 |
| 7716 | Y10B_A | A16B_N | Q14B_A | E12B_A | 9.0E-07 | 1.0E-05 | 4.180E-06 | 2.229E-06 |
| 7717 | Y10B_A | S8B_A  | A16B_N | F19B_W | 9.2E-07 | 9.0E-06 | 4.181E-06 | 2.087E-06 |
| 7718 | Y10B_A | D6B_A  | K17B_A | F19B_Q | 2.1E-06 | 6.7E-06 | 4.185E-06 | 1.385E-06 |
| 7719 | Y10B_A | G13B_W | E18B_A | T4B_A  | 2.8E-06 | 5.9E-06 | 4.185E-06 | 7.415E-07 |
| 7720 | G13B_A | S5B_A  | T2B_A  | E12B_A | 2.2E-06 | 7.1E-06 | 4.185E-06 | 1.067E-06 |
| 7721 | Y10B_A | S8B_A  | E18B_A | E12B_A | 2.3E-06 | 7.3E-06 | 4.185E-06 | 1.151E-06 |
| 7722 | S8B_A  | D6B_A  | E18B_T | T2B_A  | 2.6E-06 | 7.1E-06 | 4.185E-06 | 1.191E-06 |
| 7723 | Y10B_A | L11B_A | T2B_A  | E12B_A | 2.7E-06 | 7.6E-06 | 4.185E-06 | 1.124E-06 |
| 7724 | Y10B_A | D6B_A  | E18B_T | T4B_A  | 2.6E-06 | 7.1E-06 | 4.190E-06 | 1.167E-06 |
| 7725 | G13B_A | S8B_A  | A16B_N | G1B_A  | 1.1E-06 | 8.4E-06 | 4.190E-06 | 1.598E-06 |
| 7726 | G13B_A | E18B_T | K17B_A | T4B_A  | 2.3E-06 | 6.3E-06 | 4.190E-06 | 1.204E-06 |
| 7727 | S8B_A  | G13B_W | T4B_A  | G1B_A  | 2.3E-06 | 8.5E-06 | 4.190E-06 | 1.719E-06 |
| 7728 | S8B_A  | G13B_W | A16B_N | T2B_A  | 1.4E-06 | 6.8E-06 | 4.190E-06 | 1.570E-06 |
| 7729 | G13B_A | S8B_A  | D6B_A  | G1B_R  | 2.6E-06 | 5.3E-06 | 4.190E-06 | 6.640E-07 |
| 7730 | S8B_A  | G13B_W | K17B_A | G1B_A  | 3.1E-06 | 5.0E-06 | 4.195E-06 | 6.589E-07 |
| 7731 | G13B_A | D6B_A  | G1B_R  | Q14B_A | 1.9E-06 | 6.8E-06 | 4.195E-06 | 1.099E-06 |
| 7732 | G13B_A | V7B_A  | L11B_A | T2B_A  | 3.2E-06 | 5.5E-06 | 4.195E-06 | 7.430E-07 |
| 7733 | Y10B_A | T4B_A  | F19B_A | E12B_A | 3.0E-06 | 7.6E-06 | 4.195E-06 | 1.098E-06 |
| 7734 | G13B_A | Y10B_A | T2B_A  | E12B_A | 3.0E-06 | 6.4E-06 | 4.195E-06 | 9.545E-07 |
| 7735 | Y10B_A | V7B_A  | E18B_A | G1B_R  | 2.6E-06 | 5.5E-06 | 4.200E-06 | 9.020E-07 |
| 7736 | G13B_A | F3B_A  | F19B_A | T2B_A  | 2.8E-06 | 7.2E-06 | 4.205E-06 | 9.339E-07 |
| 7737 | G13B_A | D6B_A  | T4B_A  | F19B_A | 3.0E-06 | 7.8E-06 | 4.210E-06 | 1.121E-06 |
| 7738 | G13B_A | V7B_A  | K17B_A | E12B_A | 2.3E-06 | 7.9E-06 | 4.210E-06 | 1.205E-06 |
| 7739 | Y10B_A | V7B_A  | F3B_A  | A16B_N | 9.7E-07 | 7.6E-06 | 4.213E-06 | 1.814E-06 |
| 7740 | G13B_A | Y10B_A | D6B_A  | L11B_A | 2.5E-06 | 5.6E-06 | 4.215E-06 | 7.478E-07 |
| 7741 | G13B_A | Y10B_A | V7B_A  | G1B_R  | 3.0E-06 | 6.0E-06 | 4.215E-06 | 8.074E-07 |
| 7742 | G13B_A | S8B_A  | F3B_A  | G1B_R  | 2.6E-06 | 6.7E-06 | 4.215E-06 | 1.003E-06 |
| 7743 | G13B_A | F3B_A  | G1B_R  | Q14B_A | 3.5E-06 | 5.1E-06 | 4.215E-06 | 5.274E-07 |
| 7744 | Y10B_A | K17B_A | T4B_A  | V24B_N | 3.0E-06 | 5.7E-06 | 4.215E-06 | 7.257E-07 |
| 7745 | Y10B_A | E18B_A | T4B_A  | S9B_A  | 2.6E-06 | 6.7E-06 | 4.215E-06 | 1.004E-06 |
| 7746 | Y10B_A | K17B_A | F19B_Q | G1B_A  | 2.2E-06 | 6.5E-06 | 4.220E-06 | 1.345E-06 |
| 7747 | Y10B_A | D6B_A  | G1B_R  | F19B_A | 3.1E-06 | 6.4E-06 | 4.220E-06 | 1.087E-06 |

|      |        |        |        |        |         |         |           |           |
|------|--------|--------|--------|--------|---------|---------|-----------|-----------|
| 7748 | G13B_A | V7B_A  | F19B_A | Q14B_A | 2.6E-06 | 5.9E-06 | 4.225E-06 | 8.681E-07 |
| 7749 | G13B_A | S8B_A  | L11B_A | G1B_A  | 2.6E-06 | 5.9E-06 | 4.225E-06 | 9.363E-07 |
| 7750 | Y10B_A | S8B_A  | K17B_A | L23B_Q | 2.5E-06 | 6.5E-06 | 4.225E-06 | 1.188E-06 |
| 7751 | Y10B_A | A16B_N | S9B_A  | T2B_A  | 1.2E-06 | 8.2E-06 | 4.225E-06 | 1.620E-06 |
| 7752 | G13B_A | Y10B_A | A16B_N | L11B_A | 1.1E-06 | 7.7E-06 | 4.225E-06 | 1.943E-06 |
| 7753 | Y10B_A | D6B_A  | F19B_W | T4B_A  | 2.0E-06 | 6.9E-06 | 4.230E-06 | 1.446E-06 |
| 7754 | G13B_A | L11B_A | S5B_A  | G1B_A  | 2.6E-06 | 7.5E-06 | 4.230E-06 | 1.155E-06 |
| 7755 | G13B_A | D6B_A  | L11B_A | T2B_A  | 3.0E-06 | 6.6E-06 | 4.235E-06 | 8.975E-07 |
| 7756 | G13B_A | L11B_A | T2B_A  | G1B_A  | 2.8E-06 | 6.9E-06 | 4.240E-06 | 8.864E-07 |
| 7757 | Y10B_A | D6B_A  | G13B_W | T4B_A  | 2.6E-06 | 6.9E-06 | 4.240E-06 | 1.101E-06 |
| 7758 | Y10B_A | G13B_W | V7B_A  | K17B_A | 2.1E-06 | 5.8E-06 | 4.240E-06 | 9.179E-07 |
| 7759 | G13B_A | A16B_N | G1B_R  | S5B_A  | 7.7E-07 | 6.3E-06 | 4.244E-06 | 1.187E-06 |
| 7760 | Y10B_A | D6B_A  | V7B_A  | G1B_R  | 3.1E-06 | 7.2E-06 | 4.245E-06 | 9.671E-07 |
| 7761 | Y10B_A | T2B_A  | E12B_A | G1B_A  | 2.6E-06 | 7.9E-06 | 4.250E-06 | 1.155E-06 |
| 7762 | S8B_A  | G13B_W | E18B_A | Q14B_A | 1.9E-06 | 6.9E-06 | 4.250E-06 | 1.458E-06 |
| 7763 | S8B_A  | D6B_A  | F19B_W | T4B_A  | 2.2E-06 | 6.3E-06 | 4.250E-06 | 1.060E-06 |
| 7764 | G13B_A | Y10B_A | V7B_A  | F3B_A  | 2.4E-06 | 6.1E-06 | 4.255E-06 | 9.795E-07 |
| 7765 | Y10B_A | E18B_A | G1B_R  | F19B_A | 2.8E-06 | 6.2E-06 | 4.255E-06 | 8.929E-07 |
| 7766 | G13B_A | A16B_N | F19B_A | Q14B_A | 1.3E-06 | 6.6E-06 | 4.255E-06 | 1.450E-06 |
| 7767 | Y10B_A | F19B_A | T2B_A  | E12B_A | 2.2E-06 | 8.9E-06 | 4.255E-06 | 1.375E-06 |
| 7768 | S8B_A  | G13B_W | S5B_A  | F19B_A | 2.1E-06 | 6.9E-06 | 4.255E-06 | 1.319E-06 |
| 7769 | Y10B_A | E18B_A | S5B_A  | S9B_A  | 2.6E-06 | 6.1E-06 | 4.260E-06 | 9.939E-07 |
| 7770 | G13B_A | F3B_A  | L11B_A | S5B_A  | 3.2E-06 | 8.9E-06 | 4.260E-06 | 1.330E-06 |
| 7771 | S8B_A  | D6B_A  | G1B_R  | F19B_A | 2.8E-06 | 5.9E-06 | 4.260E-06 | 1.018E-06 |
| 7772 | Y10B_A | S8B_A  | F19B_A | E12B_A | 2.6E-06 | 8.9E-06 | 4.260E-06 | 1.533E-06 |
| 7773 | Y10B_A | S8B_A  | S5B_A  | F19B_Q | 2.2E-06 | 7.7E-06 | 4.265E-06 | 1.715E-06 |
| 7774 | S8B_A  | V7B_A  | F3B_A  | E18B_A | 3.0E-06 | 5.6E-06 | 4.265E-06 | 6.714E-07 |
| 7775 | Y10B_A | K17B_A | V24B_T | T2B_A  | 2.6E-06 | 7.0E-06 | 4.265E-06 | 1.017E-06 |
| 7776 | Y10B_A | F19B_A | Q14B_A | E12B_A | 2.7E-06 | 6.7E-06 | 4.270E-06 | 9.620E-07 |
| 7777 | Y10B_A | G13B_W | F19B_A | Q14B_A | 2.3E-06 | 7.7E-06 | 4.270E-06 | 1.477E-06 |
| 7778 | Y10B_A | F3B_A  | E18B_A | F19B_A | 2.5E-06 | 7.5E-06 | 4.270E-06 | 1.245E-06 |
| 7779 | Y10B_A | K17B_A | T4B_A  | V24B_T | 3.2E-06 | 6.0E-06 | 4.275E-06 | 8.926E-07 |
| 7780 | Y10B_A | V7B_A  | A16B_N | F19B_A | 1.6E-06 | 7.7E-06 | 4.275E-06 | 1.960E-06 |
| 7781 | G13B_A | Y10B_A | L11B_A | G1B_A  | 2.6E-06 | 6.6E-06 | 4.275E-06 | 1.169E-06 |
| 7782 | S8B_A  | G13B_W | G1B_R  | K17B_A | 2.9E-06 | 5.7E-06 | 4.275E-06 | 8.220E-07 |
| 7783 | G13B_A | D6B_A  | F19B_A | Q14B_A | 3.0E-06 | 5.9E-06 | 4.275E-06 | 8.284E-07 |
| 7784 | G13B_A | A16B_N | K17B_A | S9B_A  | 7.2E-07 | 6.7E-06 | 4.285E-06 | 1.532E-06 |
| 7785 | G13B_A | E18B_T | S5B_A  | K17B_A | 2.3E-06 | 7.4E-06 | 4.285E-06 | 1.242E-06 |
| 7786 | Y10B_A | G13B_W | E18B_A | T2B_A  | 2.6E-06 | 6.9E-06 | 4.285E-06 | 1.017E-06 |
| 7787 | G13B_A | D6B_A  | F3B_A  | Q14B_A | 2.9E-06 | 5.6E-06 | 4.285E-06 | 8.132E-07 |
| 7788 | Y10B_A | F3B_A  | A16B_N | L11B_A | 9.7E-07 | 8.0E-06 | 4.288E-06 | 1.879E-06 |
| 7789 | G13B_A | S8B_A  | V7B_A  | F3B_A  | 2.8E-06 | 6.4E-06 | 4.290E-06 | 9.072E-07 |
| 7790 | Y10B_A | E18B_A | F19B_W | Q14B_A | 2.4E-06 | 6.6E-06 | 4.290E-06 | 1.176E-06 |
| 7791 | G13B_A | D6B_A  | F3B_A  | A16B_N | 2.8E-06 | 7.6E-06 | 4.290E-06 | 1.117E-06 |
| 7792 | G13B_A | S5B_A  | F19B_W | T2B_A  | 1.9E-06 | 6.5E-06 | 4.290E-06 | 1.114E-06 |
| 7793 | G13B_A | L11B_A | E18B_A | T2B_A  | 2.1E-06 | 7.4E-06 | 4.290E-06 | 1.287E-06 |
| 7794 | G13B_A | V7B_A  | E18B_A | T2B_A  | 2.8E-06 | 6.3E-06 | 4.295E-06 | 8.319E-07 |
| 7795 | Y10B_A | V7B_A  | F19B_W | T4B_A  | 2.8E-06 | 7.5E-06 | 4.300E-06 | 1.111E-06 |
| 7796 | Y10B_A | D6B_A  | V7B_A  | L11B_A | 2.1E-06 | 6.9E-06 | 4.300E-06 | 1.142E-06 |
| 7797 | G13B_A | Y10B_A | V7B_A  | F19B_A | 2.3E-06 | 6.2E-06 | 4.300E-06 | 9.947E-07 |
| 7798 | S8B_A  | G13B_W | K17B_A | F19B_A | 3.0E-06 | 5.6E-06 | 4.305E-06 | 7.571E-07 |
| 7799 | Y10B_A | T4B_A  | K17B_S | Q14B_A | 2.1E-06 | 6.7E-06 | 4.310E-06 | 1.178E-06 |

|      |        |        |        |        |         |         |           |           |
|------|--------|--------|--------|--------|---------|---------|-----------|-----------|
| 7800 | S8B_A  | V7B_A  | A16B_N | G1B_A  | 1.5E-06 | 6.5E-06 | 4.310E-06 | 1.372E-06 |
| 7801 | Y10B_A | V7B_A  | F19B_W | Q14B_A | 1.9E-06 | 8.9E-06 | 4.310E-06 | 1.541E-06 |
| 7802 | G13B_A | V7B_A  | F3B_A  | Q14B_A | 2.7E-06 | 6.5E-06 | 4.310E-06 | 9.347E-07 |
| 7803 | Y10B_A | D6B_A  | T4B_A  | E12B_A | 2.0E-06 | 6.5E-06 | 4.310E-06 | 1.233E-06 |
| 7804 | Y10B_A | A16B_N | E18B_A | G1B_R  | 1.3E-06 | 6.6E-06 | 4.315E-06 | 1.373E-06 |
| 7805 | G13B_A | L11B_A | T4B_A  | G1B_A  | 3.1E-06 | 6.8E-06 | 4.315E-06 | 1.029E-06 |
| 7806 | S8B_A  | D6B_A  | E18B_A | G1B_R  | 3.0E-06 | 7.8E-06 | 4.315E-06 | 1.073E-06 |
| 7807 | G13B_A | V7B_A  | E18B_A | S5B_A  | 3.0E-06 | 5.6E-06 | 4.315E-06 | 6.596E-07 |
| 7808 | S8B_A  | V7B_A  | F3B_A  | F19B_A | 2.8E-06 | 6.9E-06 | 4.315E-06 | 9.949E-07 |
| 7809 | G13B_A | A16B_N | G1B_R  | Q14B_A | 2.5E-06 | 6.3E-06 | 4.315E-06 | 1.339E-06 |
| 7810 | Y10B_A | S5B_A  | F19B_W | Q14B_A | 3.2E-06 | 7.2E-06 | 4.315E-06 | 9.631E-07 |
| 7811 | Y10B_A | V7B_A  | F3B_A  | L11B_A | 3.2E-06 | 6.1E-06 | 4.315E-06 | 9.783E-07 |
| 7812 | Y10B_A | S8B_A  | F3B_A  | F19B_W | 2.8E-06 | 6.8E-06 | 4.320E-06 | 1.042E-06 |
| 7813 | G13B_A | S8B_A  | D6B_A  | V7B_A  | 2.9E-06 | 5.9E-06 | 4.320E-06 | 7.530E-07 |
| 7814 | G13B_A | L11B_A | S5B_A  | F19B_A | 3.1E-06 | 5.6E-06 | 4.325E-06 | 7.225E-07 |
| 7815 | Y10B_A | D6B_A  | V7B_A  | F19B_A | 2.4E-06 | 7.7E-06 | 4.325E-06 | 1.155E-06 |
| 7816 | S8B_A  | D6B_A  | F19B_W | T2B_A  | 2.8E-06 | 9.5E-06 | 4.325E-06 | 1.525E-06 |
| 7817 | G13B_A | S8B_A  | E18B_T | K17B_A | 2.2E-06 | 8.7E-06 | 4.330E-06 | 1.399E-06 |
| 7818 | G13B_A | L11B_A | G1B_R  | S5B_A  | 2.9E-06 | 7.9E-06 | 4.330E-06 | 1.211E-06 |
| 7819 | G13B_A | Y10B_A | S8B_A  | F19B_W | 2.1E-06 | 6.2E-06 | 4.330E-06 | 1.136E-06 |
| 7820 | Y10B_A | L11B_A | Q14B_A | E12B_A | 3.0E-06 | 7.1E-06 | 4.330E-06 | 1.096E-06 |
| 7821 | G13B_A | D6B_A  | K17B_A | E12B_A | 2.5E-06 | 7.6E-06 | 4.330E-06 | 1.167E-06 |
| 7822 | S8B_A  | V7B_A  | F3B_A  | L11B_A | 2.9E-06 | 7.6E-06 | 4.335E-06 | 1.152E-06 |
| 7823 | Y10B_A | L11B_A | S5B_A  | E12B_A | 2.6E-06 | 7.4E-06 | 4.335E-06 | 1.090E-06 |
| 7824 | G13B_A | T4B_A  | Q14B_A | E12B_A | 2.7E-06 | 6.4E-06 | 4.335E-06 | 1.129E-06 |
| 7825 | G13B_A | V7B_A  | L11B_A | Q14B_A | 3.3E-06 | 6.1E-06 | 4.340E-06 | 8.690E-07 |
| 7826 | G13B_A | Y10B_A | Q14B_A | E12B_A | 3.0E-06 | 7.1E-06 | 4.340E-06 | 1.218E-06 |
| 7827 | G13B_A | Y10B_A | E18B_A | G1B_R  | 2.7E-06 | 6.5E-06 | 4.340E-06 | 9.933E-07 |
| 7828 | Y10B_A | V7B_A  | T2B_A  | E12B_A | 2.5E-06 | 9.3E-06 | 4.340E-06 | 1.469E-06 |
| 7829 | G13B_A | S5B_A  | T4B_A  | E12B_A | 2.6E-06 | 9.8E-06 | 4.345E-06 | 1.613E-06 |
| 7830 | Y10B_A | D6B_A  | S5B_A  | F19B_W | 2.0E-06 | 1.0E-05 | 4.350E-06 | 1.973E-06 |
| 7831 | G13B_A | A16B_N | F19B_A | T2B_A  | 9.0E-07 | 8.1E-06 | 4.350E-06 | 1.891E-06 |
| 7832 | Y10B_A | V7B_A  | A16B_N | L11B_A | 1.1E-06 | 8.0E-06 | 4.350E-06 | 1.853E-06 |
| 7833 | G13B_A | V7B_A  | A16B_N | S5B_A  | 1.3E-06 | 6.8E-06 | 4.355E-06 | 1.561E-06 |
| 7834 | G13B_A | D6B_A  | L11B_A | Q14B_A | 3.0E-06 | 6.3E-06 | 4.355E-06 | 7.749E-07 |
| 7835 | G13B_A | A16B_N | G1B_R  | T4B_A  | 1.2E-06 | 7.1E-06 | 4.355E-06 | 1.686E-06 |
| 7836 | G13B_A | Y10B_A | E18B_A | F19B_A | 3.0E-06 | 5.9E-06 | 4.355E-06 | 1.004E-06 |
| 7837 | G13B_A | S8B_A  | F3B_A  | G1B_A  | 2.0E-06 | 7.5E-06 | 4.360E-06 | 1.383E-06 |
| 7838 | S8B_A  | V7B_A  | A16B_N | L11B_A | 1.6E-06 | 7.2E-06 | 4.360E-06 | 1.587E-06 |
| 7839 | Y10B_A | K17B_A | S9B_A  | F19B_A | 3.0E-06 | 8.2E-06 | 4.360E-06 | 1.375E-06 |
| 7840 | G13B_A | D6B_A  | L11B_A | S5B_A  | 1.7E-06 | 6.6E-06 | 4.365E-06 | 1.143E-06 |
| 7841 | Y10B_A | D6B_A  | V7B_A  | F3B_A  | 2.4E-06 | 7.8E-06 | 4.365E-06 | 1.207E-06 |
| 7842 | Y10B_A | S5B_A  | K17B_A | V24B_Q | 2.6E-06 | 7.1E-06 | 4.365E-06 | 1.301E-06 |
| 7843 | G13B_A | Y10B_A | D6B_A  | G1B_R  | 2.6E-06 | 6.1E-06 | 4.370E-06 | 1.024E-06 |
| 7844 | Y10B_A | V7B_A  | F19B_A | G1B_A  | 3.0E-06 | 6.2E-06 | 4.370E-06 | 8.874E-07 |
| 7845 | G13B_A | F3B_A  | L11B_A | T4B_A  | 3.2E-06 | 5.3E-06 | 4.370E-06 | 7.505E-07 |
| 7846 | Y10B_A | A16B_N | T4B_A  | S9B_A  | 9.3E-07 | 8.2E-06 | 4.371E-06 | 1.606E-06 |
| 7847 | G13B_A | D6B_A  | F3B_A  | S5B_A  | 2.4E-06 | 6.3E-06 | 4.375E-06 | 1.136E-06 |
| 7848 | Y10B_A | K17B_A | L23B_Q | Q14B_A | 2.2E-06 | 6.4E-06 | 4.375E-06 | 1.192E-06 |
| 7849 | Y10B_A | S8B_A  | A16B_N | S9B_A  | 2.4E-06 | 8.3E-06 | 4.375E-06 | 1.278E-06 |
| 7850 | G13B_A | E18B_A | T2B_A  | G1B_A  | 2.8E-06 | 7.7E-06 | 4.375E-06 | 1.018E-06 |
| 7851 | Y10B_A | S8B_A  | L11B_A | E12B_A | 2.4E-06 | 7.1E-06 | 4.380E-06 | 1.334E-06 |



|      |        |        |        |        |         |         |           |           |
|------|--------|--------|--------|--------|---------|---------|-----------|-----------|
| 7852 | G13B_A | A16B_N | E18B_A | T2B_A  | 1.0E-06 | 7.3E-06 | 4.380E-06 | 1.598E-06 |
| 7853 | Y10B_A | E18B_T | T4B_A  | Q14B_A | 2.7E-06 | 6.7E-06 | 4.380E-06 | 1.093E-06 |
| 7854 | G13B_A | F3B_A  | L11B_A | Q14B_A | 2.7E-06 | 7.2E-06 | 4.380E-06 | 9.300E-07 |
| 7855 | Y10B_A | E18B_A | T2B_A  | E12B_A | 3.1E-06 | 6.2E-06 | 4.385E-06 | 9.805E-07 |
| 7856 | S8B_A  | V7B_A  | F3B_A  | G1B_A  | 2.7E-06 | 6.1E-06 | 4.385E-06 | 6.998E-07 |
| 7857 | G13B_A | V7B_A  | T4B_A  | F19B_A | 3.2E-06 | 6.9E-06 | 4.385E-06 | 9.832E-07 |
| 7858 | G13B_A | E18B_T | K17B_A | Q14B_A | 2.7E-06 | 7.0E-06 | 4.385E-06 | 1.301E-06 |
| 7859 | G13B_A | E18B_A | G1B_R  | T2B_A  | 2.7E-06 | 6.5E-06 | 4.390E-06 | 9.706E-07 |
| 7860 | Y10B_A | D6B_A  | K17B_A | L23B_R | 2.3E-06 | 7.5E-06 | 4.390E-06 | 1.449E-06 |
| 7861 | G13B_A | D6B_A  | A16B_N | S5B_A  | 1.4E-06 | 7.0E-06 | 4.395E-06 | 1.617E-06 |
| 7862 | Y10B_A | D6B_A  | L11B_A | G1B_A  | 3.1E-06 | 5.6E-06 | 4.395E-06 | 6.917E-07 |
| 7863 | G13B_A | Y10B_A | D6B_A  | G1B_A  | 2.8E-06 | 7.8E-06 | 4.400E-06 | 1.002E-06 |
| 7864 | Y10B_A | E18B_A | Q14B_A | E12B_A | 3.3E-06 | 6.2E-06 | 4.400E-06 | 8.360E-07 |
| 7865 | G13B_A | D6B_A  | F3B_A  | T4B_A  | 1.8E-06 | 8.3E-06 | 4.405E-06 | 1.468E-06 |
| 7866 | G13B_A | V7B_A  | F3B_A  | T2B_A  | 2.7E-06 | 6.9E-06 | 4.405E-06 | 1.171E-06 |
| 7867 | Y10B_A | E18B_A | S5B_A  | E12B_A | 2.9E-06 | 6.2E-06 | 4.410E-06 | 9.640E-07 |
| 7868 | G13B_A | V7B_A  | L11B_A | T4B_A  | 2.8E-06 | 7.2E-06 | 4.410E-06 | 9.458E-07 |
| 7869 | Y10B_A | E18B_A | F19B_A | G1B_A  | 2.5E-06 | 6.3E-06 | 4.410E-06 | 1.030E-06 |
| 7870 | Y10B_A | G13B_W | K17B_A | G1B_A  | 2.9E-06 | 5.6E-06 | 4.415E-06 | 7.956E-07 |
| 7871 | G13B_A | F3B_A  | Q14B_A | G1B_A  | 3.2E-06 | 6.9E-06 | 4.415E-06 | 1.034E-06 |
| 7872 | S8B_A  | D6B_A  | V7B_A  | F3B_A  | 3.0E-06 | 6.9E-06 | 4.415E-06 | 1.041E-06 |
| 7873 | Y10B_A | K17B_A | L23B_R | Q14B_A | 2.4E-06 | 7.1E-06 | 4.420E-06 | 1.326E-06 |
| 7874 | G13B_A | F3B_A  | T4B_A  | G1B_A  | 1.9E-06 | 6.9E-06 | 4.425E-06 | 1.350E-06 |
| 7875 | G13B_A | S8B_A  | V7B_A  | G1B_A  | 2.8E-06 | 7.2E-06 | 4.425E-06 | 1.239E-06 |
| 7876 | Y10B_A | F3B_A  | E18B_A | G1B_A  | 2.0E-06 | 5.6E-06 | 4.425E-06 | 9.002E-07 |
| 7877 | Y10B_A | E18B_A | S9B_A  | T2B_A  | 2.7E-06 | 7.1E-06 | 4.430E-06 | 1.262E-06 |
| 7878 | S8B_A  | D6B_A  | V7B_A  | F19B_A | 2.6E-06 | 7.8E-06 | 4.430E-06 | 1.217E-06 |
| 7879 | Y10B_A | V7B_A  | E18B_A | F19B_A | 3.0E-06 | 7.4E-06 | 4.430E-06 | 1.141E-06 |
| 7880 | G13B_A | E18B_A | G1B_R  | S5B_A  | 2.8E-06 | 6.9E-06 | 4.435E-06 | 1.177E-06 |
| 7881 | G13B_A | S8B_A  | Q14B_A | E12B_A | 2.2E-06 | 6.7E-06 | 4.435E-06 | 1.221E-06 |
| 7882 | Y10B_A | S8B_A  | S5B_A  | K17B_S | 2.5E-06 | 6.4E-06 | 4.435E-06 | 1.121E-06 |
| 7883 | G13B_A | V7B_A  | S5B_A  | G1B_A  | 2.2E-06 | 6.9E-06 | 4.435E-06 | 1.023E-06 |
| 7884 | G13B_A | F3B_A  | S5B_A  | G1B_A  | 2.7E-06 | 6.1E-06 | 4.435E-06 | 9.045E-07 |
| 7885 | G13B_A | F3B_A  | L11B_A | T2B_A  | 3.2E-06 | 1.0E-05 | 4.440E-06 | 1.526E-06 |
| 7886 | Y10B_A | V7B_A  | S5B_A  | E12B_A | 2.6E-06 | 7.1E-06 | 4.440E-06 | 1.149E-06 |
| 7887 | G13B_A | K17B_A | S9B_A  | Q14B_A | 2.4E-06 | 6.7E-06 | 4.440E-06 | 1.115E-06 |
| 7888 | Y10B_A | E18B_A | S5B_A  | F19B_W | 2.8E-06 | 7.8E-06 | 4.440E-06 | 1.395E-06 |
| 7889 | S8B_A  | D6B_A  | T2B_A  | E12B_A | 2.0E-06 | 6.9E-06 | 4.440E-06 | 1.161E-06 |
| 7890 | G13B_A | S5B_A  | F19B_W | Q14B_A | 2.2E-06 | 1.0E-05 | 4.440E-06 | 1.981E-06 |
| 7891 | Y10B_A | D6B_A  | F3B_A  | A16B_N | 1.4E-06 | 7.3E-06 | 4.445E-06 | 1.792E-06 |
| 7892 | Y10B_A | S8B_A  | K17B_A | L23B_R | 2.9E-06 | 7.1E-06 | 4.445E-06 | 1.199E-06 |
| 7893 | G13B_A | L11B_A | Q14B_A | G1B_A  | 3.2E-06 | 6.9E-06 | 4.445E-06 | 9.714E-07 |
| 7894 | Y10B_A | F3B_A  | K17B_A | S9B_A  | 2.8E-06 | 6.0E-06 | 4.445E-06 | 8.781E-07 |
| 7895 | G13B_A | D6B_A  | Q14B_A | G1B_A  | 3.5E-06 | 6.3E-06 | 4.445E-06 | 8.787E-07 |
| 7896 | Y10B_A | G13B_W | E18B_A | S5B_A  | 3.0E-06 | 9.1E-06 | 4.445E-06 | 1.412E-06 |
| 7897 | Y10B_A | S8B_A  | K17B_A | V24B_N | 2.5E-06 | 8.3E-06 | 4.450E-06 | 1.569E-06 |
| 7898 | S8B_A  | D6B_A  | E18B_T | K17B_A | 2.6E-06 | 6.8E-06 | 4.460E-06 | 8.970E-07 |
| 7899 | G13B_A | Y10B_A | L11B_A | F19B_A | 2.8E-06 | 7.5E-06 | 4.460E-06 | 1.093E-06 |
| 7900 | G13B_A | V7B_A  | T4B_A  | G1B_A  | 3.2E-06 | 6.5E-06 | 4.465E-06 | 9.309E-07 |
| 7901 | S8B_A  | D6B_A  | F3B_A  | G1B_A  | 2.5E-06 | 6.3E-06 | 4.465E-06 | 9.842E-07 |
| 7902 | S8B_A  | D6B_A  | V7B_A  | G1B_R  | 3.0E-06 | 7.2E-06 | 4.465E-06 | 1.174E-06 |
| 7903 | G13B_A | S8B_A  | G1B_R  | F19B_A | 3.2E-06 | 6.0E-06 | 4.470E-06 | 8.424E-07 |

|      |        |        |        |        |         |         |           |           |
|------|--------|--------|--------|--------|---------|---------|-----------|-----------|
| 7904 | Y10B_A | F3B_A  | F19B_W | T2B_A  | 3.1E-06 | 9.5E-06 | 4.470E-06 | 1.430E-06 |
| 7905 | G13B_A | S8B_A  | V7B_A  | E18B_A | 2.8E-06 | 5.7E-06 | 4.470E-06 | 8.014E-07 |
| 7906 | G13B_A | D6B_A  | S5B_A  | G1B_A  | 3.0E-06 | 6.6E-06 | 4.475E-06 | 9.408E-07 |
| 7907 | Y10B_A | S8B_A  | L11B_A | F19B_W | 2.7E-06 | 6.5E-06 | 4.480E-06 | 1.093E-06 |
| 7908 | S8B_A  | G13B_W | V7B_A  | K17B_A | 3.2E-06 | 5.8E-06 | 4.480E-06 | 8.339E-07 |
| 7909 | G13B_A | V7B_A  | F19B_A | T2B_A  | 2.3E-06 | 6.4E-06 | 4.485E-06 | 1.147E-06 |
| 7910 | Y10B_A | V7B_A  | F3B_A  | E18B_A | 3.2E-06 | 5.9E-06 | 4.485E-06 | 8.774E-07 |
| 7911 | Y10B_A | S8B_A  | K17B_S | Q14B_A | 3.2E-06 | 6.0E-06 | 4.485E-06 | 7.795E-07 |
| 7912 | S8B_A  | G13B_W | F3B_A  | K17B_A | 3.6E-06 | 5.8E-06 | 4.485E-06 | 7.714E-07 |
| 7913 | G13B_A | D6B_A  | V7B_A  | T4B_A  | 3.0E-06 | 9.1E-06 | 4.485E-06 | 1.317E-06 |
| 7914 | Y10B_A | F19B_Q | Q14B_A | T2B_A  | 2.2E-06 | 7.7E-06 | 4.485E-06 | 1.602E-06 |
| 7915 | Y10B_A | E18B_T | S5B_A  | T4B_A  | 3.2E-06 | 6.7E-06 | 4.490E-06 | 9.408E-07 |
| 7916 | Y10B_A | K17B_S | Q14B_A | T2B_A  | 2.9E-06 | 7.5E-06 | 4.490E-06 | 1.209E-06 |
| 7917 | G13B_A | Y10B_A | T4B_A  | E12B_A | 3.0E-06 | 7.1E-06 | 4.490E-06 | 1.111E-06 |
| 7918 | S8B_A  | D6B_A  | F19B_A | G1B_A  | 2.9E-06 | 7.7E-06 | 4.490E-06 | 1.217E-06 |
| 7919 | G13B_A | K17B_A | T4B_A  | S9B_A  | 3.2E-06 | 7.4E-06 | 4.495E-06 | 1.160E-06 |
| 7920 | S8B_A  | D6B_A  | G13B_W | T2B_A  | 2.6E-06 | 6.9E-06 | 4.495E-06 | 1.179E-06 |
| 7921 | G13B_A | F3B_A  | E18B_A | T2B_A  | 3.4E-06 | 6.3E-06 | 4.495E-06 | 9.087E-07 |
| 7922 | G13B_A | D6B_A  | E18B_A | S5B_A  | 3.0E-06 | 7.1E-06 | 4.495E-06 | 1.080E-06 |
| 7923 | G13B_A | D6B_A  | L11B_A | T4B_A  | 3.0E-06 | 6.6E-06 | 4.500E-06 | 8.137E-07 |
| 7924 | G13B_A | F3B_A  | E18B_A | S5B_A  | 2.8E-06 | 6.9E-06 | 4.500E-06 | 9.830E-07 |
| 7925 | S8B_A  | V7B_A  | F3B_A  | A16B_N | 1.7E-06 | 6.8E-06 | 4.500E-06 | 1.192E-06 |
| 7926 | Y10B_A | K17B_A | V24B_T | Q14B_A | 3.3E-06 | 6.0E-06 | 4.500E-06 | 7.327E-07 |
| 7927 | Y10B_A | K17B_A | T4B_A  | L23B_Q | 2.7E-06 | 7.2E-06 | 4.505E-06 | 1.245E-06 |
| 7928 | G13B_A | F3B_A  | A16B_N | T2B_A  | 1.4E-06 | 6.8E-06 | 4.505E-06 | 1.617E-06 |
| 7929 | G13B_A | Y10B_A | F19B_A | G1B_A  | 3.1E-06 | 6.2E-06 | 4.505E-06 | 1.036E-06 |
| 7930 | Y10B_A | E18B_T | G1B_R  | K17B_A | 2.1E-06 | 6.6E-06 | 4.510E-06 | 1.109E-06 |
| 7931 | G13B_A | D6B_A  | G1B_R  | S5B_A  | 2.8E-06 | 6.7E-06 | 4.510E-06 | 1.172E-06 |
| 7932 | Y10B_A | D6B_A  | F3B_A  | G1B_A  | 2.4E-06 | 6.6E-06 | 4.510E-06 | 1.076E-06 |
| 7933 | G13B_A | A16B_N | E18B_A | G1B_A  | 2.5E-06 | 7.6E-06 | 4.510E-06 | 1.357E-06 |
| 7934 | G13B_A | L11B_A | F19B_A | Q14B_A | 2.3E-06 | 7.7E-06 | 4.510E-06 | 1.393E-06 |
| 7935 | Y10B_A | D6B_A  | Q14B_A | E12B_A | 3.1E-06 | 7.6E-06 | 4.515E-06 | 1.243E-06 |
| 7936 | Y10B_A | S5B_A  | K17B_S | Q14B_A | 2.7E-06 | 6.7E-06 | 4.515E-06 | 1.075E-06 |
| 7937 | S8B_A  | D6B_A  | L11B_A | F19B_A | 3.0E-06 | 6.3E-06 | 4.515E-06 | 1.056E-06 |
| 7938 | Y10B_A | F3B_A  | A16B_N | F19B_A | 1.4E-06 | 9.5E-06 | 4.515E-06 | 2.047E-06 |
| 7939 | G13B_A | S8B_A  | F3B_A  | L11B_A | 2.7E-06 | 6.4E-06 | 4.515E-06 | 1.038E-06 |
| 7940 | Y10B_A | K17B_A | F19B_W | G1B_A  | 2.1E-06 | 7.0E-06 | 4.520E-06 | 1.126E-06 |
| 7941 | Y10B_A | F3B_A  | S5B_A  | E12B_A | 3.1E-06 | 6.7E-06 | 4.520E-06 | 9.070E-07 |
| 7942 | Y10B_A | S8B_A  | T4B_A  | K17B_S | 2.4E-06 | 6.4E-06 | 4.520E-06 | 1.161E-06 |
| 7943 | G13B_A | S8B_A  | F19B_A | G1B_A  | 3.1E-06 | 6.9E-06 | 4.520E-06 | 1.008E-06 |
| 7944 | Y10B_A | F3B_A  | L11B_A | F19B_A | 3.2E-06 | 1.1E-05 | 4.525E-06 | 1.629E-06 |
| 7945 | S8B_A  | D6B_A  | A16B_N | E18B_A | 7.4E-07 | 6.7E-06 | 4.527E-06 | 1.872E-06 |
| 7946 | G13B_A | E18B_A | T4B_A  | F19B_A | 3.0E-06 | 6.3E-06 | 4.535E-06 | 8.975E-07 |
| 7947 | G13B_A | S5B_A  | K17B_A | F19B_Q | 1.7E-06 | 9.9E-06 | 4.535E-06 | 2.313E-06 |
| 7948 | G13B_A | F3B_A  | T4B_A  | F19B_A | 3.2E-06 | 6.9E-06 | 4.540E-06 | 9.383E-07 |
| 7949 | G13B_A | S8B_A  | D6B_A  | G1B_A  | 3.1E-06 | 7.4E-06 | 4.540E-06 | 1.034E-06 |
| 7950 | Y10B_A | S5B_A  | E12B_A | G1B_A  | 3.0E-06 | 7.1E-06 | 4.540E-06 | 1.271E-06 |
| 7951 | G13B_A | Q14B_A | T2B_A  | E12B_A | 2.6E-06 | 7.1E-06 | 4.545E-06 | 1.261E-06 |
| 7952 | G13B_A | Y10B_A | K17B_A | F19B_W | 2.9E-06 | 6.2E-06 | 4.545E-06 | 1.078E-06 |
| 7953 | G13B_A | Y10B_A | V7B_A  | E18B_A | 3.4E-06 | 6.9E-06 | 4.545E-06 | 8.532E-07 |
| 7954 | S8B_A  | G13B_W | S5B_A  | T2B_A  | 3.1E-06 | 5.9E-06 | 4.545E-06 | 8.095E-07 |
| 7955 | Y10B_A | L11B_A | E18B_A | G1B_R  | 3.2E-06 | 6.5E-06 | 4.550E-06 | 9.372E-07 |

|      |        |        |        |        |         |         |           |           |
|------|--------|--------|--------|--------|---------|---------|-----------|-----------|
| 7956 | G13B_A | V7B_A  | F3B_A  | S5B_A  | 3.1E-06 | 6.5E-06 | 4.550E-06 | 9.473E-07 |
| 7957 | G13B_A | V7B_A  | F3B_A  | T4B_A  | 2.4E-06 | 8.5E-06 | 4.555E-06 | 1.449E-06 |
| 7958 | Y10B_A | V7B_A  | A16B_N | G1B_A  | 7.9E-07 | 8.0E-06 | 4.555E-06 | 2.301E-06 |
| 7959 | S8B_A  | D6B_A  | F3B_A  | F19B_A | 3.3E-06 | 6.3E-06 | 4.555E-06 | 9.105E-07 |
| 7960 | Y10B_A | K17B_A | L23B_R | T2B_A  | 2.3E-06 | 7.4E-06 | 4.555E-06 | 1.215E-06 |
| 7961 | G13B_A | E18B_A | T4B_A  | G1B_A  | 3.4E-06 | 6.3E-06 | 4.555E-06 | 9.202E-07 |
| 7962 | Y10B_A | E18B_T | T4B_A  | T2B_A  | 3.2E-06 | 7.8E-06 | 4.560E-06 | 1.432E-06 |
| 7963 | G13B_A | D6B_A  | G1B_R  | T4B_A  | 3.2E-06 | 8.5E-06 | 4.565E-06 | 1.204E-06 |
| 7964 | Y10B_A | A16B_N | L11B_A | E18B_A | 1.4E-06 | 6.7E-06 | 4.565E-06 | 1.445E-06 |
| 7965 | G13B_A | L11B_A | E18B_A | S5B_A  | 1.7E-06 | 7.7E-06 | 4.565E-06 | 1.300E-06 |
| 7966 | G13B_A | Y10B_A | F3B_A  | G1B_R  | 2.5E-06 | 7.0E-06 | 4.570E-06 | 1.045E-06 |
| 7967 | Y10B_A | E18B_T | K17B_A | G1B_A  | 2.7E-06 | 7.4E-06 | 4.570E-06 | 1.122E-06 |
| 7968 | G13B_A | E18B_A | F19B_A | Q14B_A | 2.5E-06 | 8.2E-06 | 4.570E-06 | 1.419E-06 |
| 7969 | S8B_A  | D6B_A  | V7B_A  | L11B_A | 2.0E-06 | 8.1E-06 | 4.575E-06 | 1.424E-06 |
| 7970 | S8B_A  | D6B_A  | F3B_A  | G1B_R  | 3.2E-06 | 6.9E-06 | 4.580E-06 | 9.929E-07 |
| 7971 | G13B_A | T4B_A  | F19B_A | G1B_A  | 1.6E-06 | 7.3E-06 | 4.580E-06 | 1.426E-06 |
| 7972 | Y10B_A | V7B_A  | E18B_A | G1B_A  | 2.5E-06 | 6.3E-06 | 4.585E-06 | 1.091E-06 |
| 7973 | G13B_A | D6B_A  | S5B_A  | F19B_A | 2.3E-06 | 7.5E-06 | 4.585E-06 | 1.278E-06 |
| 7974 | G13B_A | S8B_A  | A16B_N | L11B_A | 2.8E-06 | 8.0E-06 | 4.585E-06 | 1.431E-06 |
| 7975 | Y10B_A | D6B_A  | E18B_T | K17B_A | 2.9E-06 | 7.6E-06 | 4.585E-06 | 1.308E-06 |
| 7976 | Y10B_A | D6B_A  | F3B_A  | G1B_R  | 3.2E-06 | 7.5E-06 | 4.590E-06 | 9.431E-07 |
| 7977 | Y10B_A | S5B_A  | K17B_A | L23B_R | 2.9E-06 | 7.1E-06 | 4.590E-06 | 1.277E-06 |
| 7978 | Y10B_A | S8B_A  | S9B_A  | T2B_A  | 3.2E-06 | 6.0E-06 | 4.595E-06 | 7.598E-07 |
| 7979 | G13B_A | Y10B_A | E18B_T | K17B_A | 3.2E-06 | 7.4E-06 | 4.600E-06 | 1.153E-06 |
| 7980 | Y10B_A | F3B_A  | T2B_A  | E12B_A | 3.0E-06 | 9.3E-06 | 4.605E-06 | 1.575E-06 |
| 7981 | S8B_A  | D6B_A  | F3B_A  | L11B_A | 3.0E-06 | 6.6E-06 | 4.605E-06 | 1.112E-06 |
| 7982 | G13B_A | S8B_A  | E18B_A | G1B_R  | 3.2E-06 | 6.9E-06 | 4.605E-06 | 8.562E-07 |
| 7983 | Y10B_A | V7B_A  | K17B_A | S9B_A  | 2.6E-06 | 8.7E-06 | 4.610E-06 | 1.511E-06 |
| 7984 | Y10B_A | V7B_A  | E18B_T | K17B_A | 2.7E-06 | 7.4E-06 | 4.610E-06 | 1.340E-06 |
| 7985 | Y10B_A | V7B_A  | A16B_N | G1B_R  | 1.4E-06 | 8.4E-06 | 4.615E-06 | 1.721E-06 |
| 7986 | Y10B_A | E18B_T | L11B_A | K17B_A | 2.6E-06 | 7.4E-06 | 4.615E-06 | 1.402E-06 |
| 7987 | Y10B_A | F3B_A  | E18B_T | K17B_A | 2.7E-06 | 9.8E-06 | 4.615E-06 | 1.725E-06 |
| 7988 | G13B_A | Y10B_A | A16B_N | F19B_A | 2.2E-06 | 7.3E-06 | 4.620E-06 | 1.409E-06 |
| 7989 | G13B_A | D6B_A  | T2B_A  | G1B_A  | 3.0E-06 | 6.3E-06 | 4.620E-06 | 8.514E-07 |
| 7990 | G13B_A | S8B_A  | L11B_A | F19B_A | 2.8E-06 | 9.5E-06 | 4.625E-06 | 1.666E-06 |
| 7991 | G13B_A | A16B_N | S5B_A  | G1B_A  | 1.5E-06 | 7.4E-06 | 4.630E-06 | 1.576E-06 |
| 7992 | G13B_A | F19B_A | T2B_A  | G1B_A  | 2.6E-06 | 8.5E-06 | 4.635E-06 | 1.508E-06 |
| 7993 | G13B_A | Y10B_A | E18B_A | G1B_A  | 3.5E-06 | 6.3E-06 | 4.635E-06 | 9.155E-07 |
| 7994 | G13B_A | Y10B_A | A16B_N | E18B_A | 1.2E-06 | 8.6E-06 | 4.635E-06 | 1.748E-06 |
| 7995 | G13B_A | D6B_A  | V7B_A  | T2B_A  | 2.9E-06 | 7.7E-06 | 4.635E-06 | 1.307E-06 |
| 7996 | G13B_A | Y10B_A | F3B_A  | F19B_A | 3.2E-06 | 6.9E-06 | 4.640E-06 | 1.103E-06 |
| 7997 | Y10B_A | K17B_A | E12B_A | G1B_A  | 2.8E-06 | 8.5E-06 | 4.650E-06 | 1.348E-06 |
| 7998 | G13B_A | D6B_A  | V7B_A  | S5B_A  | 2.8E-06 | 6.6E-06 | 4.650E-06 | 9.282E-07 |
| 7999 | Y10B_A | D6B_A  | A16B_N | G1B_R  | 2.5E-06 | 8.0E-06 | 4.655E-06 | 1.267E-06 |
| 8000 | S8B_A  | G13B_W | A16B_N | K17B_A | 1.1E-06 | 8.2E-06 | 4.655E-06 | 1.650E-06 |
| 8001 | Y10B_A | G1B_R  | K17B_A | S9B_A  | 3.1E-06 | 6.6E-06 | 4.660E-06 | 1.066E-06 |
| 8002 | G13B_A | V7B_A  | S5B_A  | F19B_A | 2.6E-06 | 8.5E-06 | 4.660E-06 | 1.545E-06 |
| 8003 | G13B_A | D6B_A  | V7B_A  | Q14B_A | 3.0E-06 | 7.8E-06 | 4.660E-06 | 1.191E-06 |
| 8004 | Y10B_A | S8B_A  | E18B_T | T2B_A  | 3.2E-06 | 6.3E-06 | 4.660E-06 | 9.484E-07 |
| 8005 | Y10B_A | G13B_W | F3B_A  | K17B_A | 2.3E-06 | 7.7E-06 | 4.665E-06 | 1.218E-06 |
| 8006 | G13B_A | Y10B_A | F3B_A  | E18B_A | 3.0E-06 | 6.3E-06 | 4.665E-06 | 8.035E-07 |
| 8007 | G13B_A | S8B_A  | D6B_A  | F19B_A | 2.8E-06 | 7.1E-06 | 4.665E-06 | 1.265E-06 |

|      |        |        |        |        |         |         |           |           |
|------|--------|--------|--------|--------|---------|---------|-----------|-----------|
| 8008 | G13B_A | S8B_A  | F3B_A  | A16B_N | 1.6E-06 | 7.7E-06 | 4.665E-06 | 1.726E-06 |
| 8009 | G13B_A | D6B_A  | F3B_A  | T2B_A  | 2.4E-06 | 5.9E-06 | 4.665E-06 | 8.677E-07 |
| 8010 | Y10B_A | T4B_A  | F19B_Q | T2B_A  | 3.1E-06 | 1.0E-05 | 4.670E-06 | 1.675E-06 |
| 8011 | Y10B_A | G13B_W | L11B_A | K17B_A | 2.5E-06 | 6.6E-06 | 4.670E-06 | 1.028E-06 |
| 8012 | G13B_A | S8B_A  | A16B_N | F19B_A | 1.6E-06 | 7.7E-06 | 4.670E-06 | 1.798E-06 |
| 8013 | G13B_A | K17B_A | S9B_A  | T2B_A  | 3.2E-06 | 6.3E-06 | 4.670E-06 | 8.566E-07 |
| 8014 | G13B_A | A16B_N | S5B_A  | F19B_A | 2.2E-06 | 8.2E-06 | 4.680E-06 | 1.520E-06 |
| 8015 | Y10B_A | K17B_A | T4B_A  | L23B_R | 2.9E-06 | 9.1E-06 | 4.680E-06 | 1.653E-06 |
| 8016 | G13B_A | S8B_A  | E18B_A | G1B_A  | 3.0E-06 | 8.1E-06 | 4.680E-06 | 1.279E-06 |
| 8017 | Y10B_A | T4B_A  | S9B_A  | F19B_A | 3.0E-06 | 8.7E-06 | 4.680E-06 | 1.470E-06 |
| 8018 | Y10B_A | S8B_A  | E18B_T | S5B_A  | 2.7E-06 | 8.3E-06 | 4.680E-06 | 1.334E-06 |
| 8019 | Y10B_A | S8B_A  | G13B_W | T2B_A  | 3.6E-06 | 6.9E-06 | 4.685E-06 | 8.273E-07 |
| 8020 | Y10B_A | G13B_W | S5B_A  | Q14B_A | 3.2E-06 | 6.1E-06 | 4.685E-06 | 8.267E-07 |
| 8021 | G13B_A | V7B_A  | E18B_A | T4B_A  | 2.9E-06 | 8.2E-06 | 4.685E-06 | 1.266E-06 |
| 8022 | G13B_A | A16B_N | E18B_A | S5B_A  | 1.0E-06 | 9.6E-06 | 4.690E-06 | 2.353E-06 |
| 8023 | G13B_A | K17B_A | F19B_W | T2B_A  | 3.0E-06 | 7.2E-06 | 4.695E-06 | 1.161E-06 |
| 8024 | Y10B_A | T4B_A  | S9B_A  | Q14B_A | 3.2E-06 | 7.4E-06 | 4.700E-06 | 1.057E-06 |
| 8025 | G13B_A | A16B_N | T4B_A  | F19B_A | 1.4E-06 | 9.0E-06 | 4.700E-06 | 2.182E-06 |
| 8026 | G13B_A | S8B_A  | D6B_A  | F3B_A  | 2.4E-06 | 1.1E-05 | 4.700E-06 | 1.697E-06 |
| 8027 | G13B_A | Y10B_A | A16B_N | G1B_A  | 6.7E-07 | 9.0E-06 | 4.704E-06 | 2.369E-06 |
| 8028 | G13B_A | L11B_A | E18B_A | T4B_A  | 2.9E-06 | 7.4E-06 | 4.705E-06 | 1.050E-06 |
| 8029 | G13B_A | Y10B_A | F3B_A  | A16B_N | 1.6E-06 | 6.8E-06 | 4.705E-06 | 1.631E-06 |
| 8030 | Y10B_A | S8B_A  | L11B_A | G1B_R  | 3.0E-06 | 6.4E-06 | 4.710E-06 | 9.492E-07 |
| 8031 | Y10B_A | D6B_A  | A16B_N | L11B_A | 1.3E-06 | 8.2E-06 | 4.710E-06 | 1.706E-06 |
| 8032 | G13B_A | S5B_A  | K17B_A | F19B_W | 2.8E-06 | 1.2E-05 | 4.715E-06 | 1.942E-06 |
| 8033 | G13B_A | S8B_A  | E18B_A | F19B_A | 2.8E-06 | 7.8E-06 | 4.715E-06 | 1.289E-06 |
| 8034 | Y10B_A | G13B_W | K17B_A | F19B_A | 3.1E-06 | 7.0E-06 | 4.715E-06 | 1.260E-06 |
| 8035 | Y10B_A | G13B_W | Q14B_A | T2B_A  | 3.1E-06 | 6.9E-06 | 4.720E-06 | 9.174E-07 |
| 8036 | Y10B_A | S5B_A  | K17B_A | F19B_Q | 1.8E-06 | 8.6E-06 | 4.720E-06 | 1.821E-06 |
| 8037 | Y10B_A | D6B_A  | S5B_A  | E12B_A | 2.8E-06 | 8.9E-06 | 4.720E-06 | 1.703E-06 |
| 8038 | Y10B_A | S5B_A  | S9B_A  | Q14B_A | 2.7E-06 | 6.0E-06 | 4.720E-06 | 9.551E-07 |
| 8039 | G13B_A | Y10B_A | V7B_A  | A16B_N | 1.3E-06 | 1.1E-05 | 4.720E-06 | 2.173E-06 |
| 8040 | G13B_A | E18B_T | K17B_A | T2B_A  | 2.7E-06 | 9.3E-06 | 4.720E-06 | 1.804E-06 |
| 8041 | Y10B_A | S5B_A  | S9B_A  | T2B_A  | 3.2E-06 | 6.7E-06 | 4.720E-06 | 8.794E-07 |
| 8042 | G13B_A | S8B_A  | L11B_A | E18B_A | 2.6E-06 | 6.9E-06 | 4.720E-06 | 1.163E-06 |
| 8043 | Y10B_A | G13B_W | T4B_A  | Q14B_A | 2.6E-06 | 7.2E-06 | 4.720E-06 | 1.296E-06 |
| 8044 | Y10B_A | A16B_N | E18B_A | G1B_A  | 8.8E-07 | 6.7E-06 | 4.729E-06 | 1.540E-06 |
| 8045 | G13B_A | F3B_A  | E18B_A | T4B_A  | 4.0E-06 | 6.6E-06 | 4.730E-06 | 7.183E-07 |
| 8046 | S8B_A  | D6B_A  | T4B_A  | E12B_A | 2.9E-06 | 1.0E-05 | 4.730E-06 | 1.714E-06 |
| 8047 | G13B_A | S5B_A  | K17B_A | S9B_A  | 3.3E-06 | 7.7E-06 | 4.735E-06 | 1.009E-06 |
| 8048 | Y10B_A | S9B_A  | Q14B_A | T2B_A  | 3.7E-06 | 6.7E-06 | 4.740E-06 | 7.803E-07 |
| 8049 | Y10B_A | K17B_A | F19B_Q | Q14B_A | 2.6E-06 | 8.7E-06 | 4.740E-06 | 1.495E-06 |
| 8050 | G13B_A | Y10B_A | K17B_A | E12B_A | 3.0E-06 | 6.5E-06 | 4.740E-06 | 1.051E-06 |
| 8051 | Y10B_A | D6B_A  | F3B_A  | F19B_A | 2.8E-06 | 9.1E-06 | 4.745E-06 | 1.577E-06 |
| 8052 | Y10B_A | S5B_A  | K17B_A | V24B_T | 2.6E-06 | 7.8E-06 | 4.745E-06 | 1.372E-06 |
| 8053 | G13B_A | S8B_A  | F3B_A  | E18B_A | 3.5E-06 | 6.9E-06 | 4.745E-06 | 1.056E-06 |
| 8054 | Y10B_A | D6B_A  | G13B_W | K17B_A | 3.3E-06 | 7.4E-06 | 4.745E-06 | 9.897E-07 |
| 8055 | G13B_A | L11B_A | G1B_R  | K17B_A | 3.3E-06 | 7.9E-06 | 4.755E-06 | 1.146E-06 |
| 8056 | Y10B_A | F3B_A  | L11B_A | E18B_A | 2.8E-06 | 7.8E-06 | 4.760E-06 | 1.298E-06 |
| 8057 | Y10B_A | T4B_A  | S9B_A  | T2B_A  | 3.5E-06 | 7.1E-06 | 4.760E-06 | 1.093E-06 |
| 8058 | S8B_A  | D6B_A  | F19B_W | Q14B_A | 2.4E-06 | 9.5E-06 | 4.770E-06 | 1.923E-06 |
| 8059 | G13B_A | G1B_R  | T4B_A  | Q14B_A | 3.5E-06 | 7.2E-06 | 4.775E-06 | 1.004E-06 |

|      |        |        |        |        |         |         |           |           |
|------|--------|--------|--------|--------|---------|---------|-----------|-----------|
| 8060 | G13B_A | S8B_A  | K17B_A | F19B_W | 1.8E-06 | 7.2E-06 | 4.775E-06 | 1.278E-06 |
| 8061 | G13B_A | A16B_N | T4B_A  | G1B_A  | 1.1E-06 | 9.4E-06 | 4.775E-06 | 2.052E-06 |
| 8062 | Y10B_A | G13B_W | A16B_N | K17B_A | 1.4E-06 | 7.7E-06 | 4.780E-06 | 2.317E-06 |
| 8063 | G13B_A | Y10B_A | D6B_A  | F3B_A  | 3.0E-06 | 9.5E-06 | 4.780E-06 | 1.426E-06 |
| 8064 | Y10B_A | A16B_N | E18B_A | F19B_A | 1.9E-06 | 8.8E-06 | 4.780E-06 | 1.726E-06 |
| 8065 | Y10B_A | K17B_A | L23B_Q | T2B_A  | 2.3E-06 | 1.1E-05 | 4.780E-06 | 2.246E-06 |
| 8066 | Y10B_A | G13B_W | S5B_A  | T4B_A  | 3.6E-06 | 6.9E-06 | 4.785E-06 | 7.562E-07 |
| 8067 | Y10B_A | S8B_A  | E18B_T | Q14B_A | 3.2E-06 | 9.1E-06 | 4.785E-06 | 1.478E-06 |
| 8068 | S8B_A  | G13B_W | S5B_A  | Q14B_A | 3.4E-06 | 6.9E-06 | 4.785E-06 | 1.126E-06 |
| 8069 | G13B_A | L11B_A | E18B_A | Q14B_A | 2.8E-06 | 7.3E-06 | 4.790E-06 | 9.787E-07 |
| 8070 | S8B_A  | G13B_W | T4B_A  | T2B_A  | 2.9E-06 | 6.9E-06 | 4.790E-06 | 1.036E-06 |
| 8071 | G13B_A | A16B_N | L11B_A | T4B_A  | 1.4E-06 | 9.4E-06 | 4.795E-06 | 2.146E-06 |
| 8072 | G13B_A | D6B_A  | E18B_A | T4B_A  | 2.9E-06 | 8.7E-06 | 4.800E-06 | 1.295E-06 |
| 8073 | G13B_A | D6B_A  | F19B_A | T2B_A  | 2.3E-06 | 9.5E-06 | 4.800E-06 | 1.667E-06 |
| 8074 | G13B_A | E18B_A | F19B_A | T2B_A  | 3.1E-06 | 1.1E-05 | 4.800E-06 | 1.777E-06 |
| 8075 | Y10B_A | S5B_A  | T4B_A  | S9B_A  | 1.9E-06 | 7.4E-06 | 4.800E-06 | 1.413E-06 |
| 8076 | G13B_A | Y10B_A | D6B_A  | V7B_A  | 3.5E-06 | 7.8E-06 | 4.805E-06 | 1.285E-06 |
| 8077 | Y10B_A | F3B_A  | A16B_N | G1B_A  | 1.9E-06 | 9.9E-06 | 4.815E-06 | 1.815E-06 |
| 8078 | S8B_A  | D6B_A  | V7B_A  | E18B_A | 3.0E-06 | 6.8E-06 | 4.815E-06 | 1.207E-06 |
| 8079 | G13B_A | D6B_A  | A16B_N | Q14B_A | 2.4E-06 | 8.6E-06 | 4.815E-06 | 1.573E-06 |
| 8080 | S8B_A  | D6B_A  | G13B_W | K17B_A | 2.3E-06 | 6.5E-06 | 4.815E-06 | 8.689E-07 |
| 8081 | Y10B_A | L11B_A | K17B_A | F19B_W | 2.6E-06 | 9.5E-06 | 4.820E-06 | 1.531E-06 |
| 8082 | S8B_A  | G13B_W | T4B_A  | Q14B_A | 3.1E-06 | 6.6E-06 | 4.820E-06 | 8.829E-07 |
| 8083 | Y10B_A | S8B_A  | G1B_R  | F19B_A | 2.9E-06 | 8.8E-06 | 4.820E-06 | 1.481E-06 |
| 8084 | G13B_A | Y10B_A | G1B_R  | Q14B_A | 2.9E-06 | 7.5E-06 | 4.825E-06 | 1.160E-06 |
| 8085 | Y10B_A | E18B_T | S5B_A  | Q14B_A | 3.2E-06 | 7.1E-06 | 4.825E-06 | 1.171E-06 |
| 8086 | G13B_A | Y10B_A | V7B_A  | G1B_A  | 3.1E-06 | 8.9E-06 | 4.825E-06 | 1.365E-06 |
| 8087 | Y10B_A | V7B_A  | F3B_A  | F19B_A | 2.6E-06 | 9.5E-06 | 4.830E-06 | 1.735E-06 |
| 8088 | G13B_A | E18B_A | S5B_A  | G1B_A  | 2.8E-06 | 1.1E-05 | 4.835E-06 | 1.707E-06 |
| 8089 | Y10B_A | S8B_A  | F19B_W | Q14B_A | 2.8E-06 | 9.1E-06 | 4.840E-06 | 1.393E-06 |
| 8090 | G13B_A | S8B_A  | D6B_A  | L11B_A | 3.3E-06 | 7.4E-06 | 4.840E-06 | 1.068E-06 |
| 8091 | G13B_A | A16B_N | L11B_A | Q14B_A | 2.9E-06 | 9.6E-06 | 4.845E-06 | 1.477E-06 |
| 8092 | Y10B_A | L11B_A | K17B_A | E12B_A | 3.4E-06 | 6.7E-06 | 4.845E-06 | 9.383E-07 |
| 8093 | S8B_A  | D6B_A  | Q14B_A | E12B_A | 3.3E-06 | 7.3E-06 | 4.845E-06 | 1.202E-06 |
| 8094 | Y10B_A | D6B_A  | F3B_A  | L11B_A | 2.6E-06 | 6.9E-06 | 4.845E-06 | 1.175E-06 |
| 8095 | G13B_A | K17B_A | F19B_W | Q14B_A | 3.1E-06 | 8.0E-06 | 4.850E-06 | 1.356E-06 |
| 8096 | S8B_A  | G13B_W | L11B_A | K17B_A | 2.8E-06 | 7.7E-06 | 4.850E-06 | 1.301E-06 |
| 8097 | Y10B_A | S5B_A  | T4B_A  | K17B_S | 3.4E-06 | 6.4E-06 | 4.855E-06 | 9.116E-07 |
| 8098 | G13B_A | Y10B_A | D6B_A  | F19B_A | 2.6E-06 | 7.4E-06 | 4.855E-06 | 1.409E-06 |
| 8099 | Y10B_A | A16B_N | G1B_R  | Q14B_A | 1.4E-06 | 9.8E-06 | 4.865E-06 | 2.559E-06 |
| 8100 | G13B_A | A16B_N | G1B_R  | K17B_A | 1.1E-06 | 9.8E-06 | 4.865E-06 | 2.179E-06 |
| 8101 | G13B_A | A16B_N | K17B_A | F19B_A | 2.3E-06 | 7.3E-06 | 4.865E-06 | 1.570E-06 |
| 8102 | Y10B_A | V7B_A  | F3B_A  | G1B_A  | 3.6E-06 | 7.9E-06 | 4.870E-06 | 9.454E-07 |
| 8103 | Y10B_A | S8B_A  | G13B_W | S5B_A  | 3.2E-06 | 6.9E-06 | 4.875E-06 | 1.056E-06 |
| 8104 | S8B_A  | D6B_A  | A16B_N | L11B_A | 7.2E-07 | 8.6E-06 | 4.878E-06 | 2.148E-06 |
| 8105 | G13B_A | D6B_A  | A16B_N | T4B_A  | 1.2E-06 | 7.9E-06 | 4.880E-06 | 1.842E-06 |
| 8106 | Y10B_A | F3B_A  | A16B_N | Q14B_A | 1.3E-06 | 1.0E-05 | 4.885E-06 | 2.490E-06 |
| 8107 | S8B_A  | G13B_W | S5B_A  | T4B_A  | 3.4E-06 | 7.7E-06 | 4.890E-06 | 1.247E-06 |
| 8108 | Y10B_A | E18B_T | Q14B_A | T2B_A  | 3.7E-06 | 7.8E-06 | 4.895E-06 | 1.277E-06 |
| 8109 | Y10B_A | D6B_A  | L11B_A | F19B_A | 3.3E-06 | 8.1E-06 | 4.900E-06 | 1.203E-06 |
| 8110 | G13B_A | S8B_A  | K17B_A | S9B_A  | 3.2E-06 | 7.4E-06 | 4.900E-06 | 1.286E-06 |
| 8111 | G13B_A | G1B_R  | K17B_A | F19B_A | 2.9E-06 | 9.2E-06 | 4.905E-06 | 1.500E-06 |

|      |        |        |        |        |         |         |           |           |
|------|--------|--------|--------|--------|---------|---------|-----------|-----------|
| 8112 | G13B_A | S8B_A  | G1B_R  | Q14B_A | 3.4E-06 | 7.5E-06 | 4.905E-06 | 1.186E-06 |
| 8113 | Y10B_A | T4B_A  | K17B_S | T2B_A  | 3.4E-06 | 7.5E-06 | 4.905E-06 | 1.198E-06 |
| 8114 | S8B_A  | D6B_A  | L11B_A | G1B_A  | 2.5E-06 | 1.1E-05 | 4.905E-06 | 1.950E-06 |
| 8115 | Y10B_A | D6B_A  | V7B_A  | G1B_A  | 3.6E-06 | 6.9E-06 | 4.910E-06 | 7.966E-07 |
| 8116 | G13B_A | S8B_A  | D6B_A  | A16B_N | 1.4E-06 | 8.6E-06 | 4.910E-06 | 1.761E-06 |
| 8117 | Y10B_A | V7B_A  | A16B_N | E18B_A | 1.2E-06 | 7.0E-06 | 4.910E-06 | 1.638E-06 |
| 8118 | Y10B_A | A16B_N | K17B_A | S9B_A  | 1.1E-06 | 9.2E-06 | 4.910E-06 | 2.073E-06 |
| 8119 | G13B_A | Y10B_A | K17B_A | S9B_A  | 2.9E-06 | 6.7E-06 | 4.915E-06 | 9.399E-07 |
| 8120 | Y10B_A | G1B_R  | K17B_A | F19B_W | 3.2E-06 | 8.8E-06 | 4.920E-06 | 1.453E-06 |
| 8121 | G13B_A | Y10B_A | L11B_A | E18B_A | 3.1E-06 | 6.9E-06 | 4.925E-06 | 9.968E-07 |
| 8122 | Y10B_A | V7B_A  | A16B_N | Q14B_A | 1.2E-06 | 8.1E-06 | 4.930E-06 | 2.152E-06 |
| 8123 | Y10B_A | L11B_A | E18B_A | G1B_A  | 3.0E-06 | 9.5E-06 | 4.930E-06 | 1.475E-06 |
| 8124 | Y10B_A | L11B_A | K17B_A | S9B_A  | 3.5E-06 | 6.7E-06 | 4.935E-06 | 9.422E-07 |
| 8125 | Y10B_A | V7B_A  | L11B_A | S5B_A  | 2.9E-06 | 7.7E-06 | 4.935E-06 | 1.331E-06 |
| 8126 | Y10B_A | G13B_W | E18B_A | K17B_A | 3.3E-06 | 6.5E-06 | 4.935E-06 | 8.792E-07 |
| 8127 | G13B_A | D6B_A  | T4B_A  | G1B_A  | 3.0E-06 | 6.9E-06 | 4.945E-06 | 1.080E-06 |
| 8128 | Y10B_A | S8B_A  | E18B_A | F19B_W | 2.4E-06 | 8.1E-06 | 4.945E-06 | 1.392E-06 |
| 8129 | Y10B_A | D6B_A  | E18B_A | G1B_A  | 2.4E-06 | 6.6E-06 | 4.950E-06 | 1.072E-06 |
| 8130 | Y10B_A | S5B_A  | F19B_W | T2B_A  | 2.8E-06 | 1.1E-05 | 4.955E-06 | 2.013E-06 |
| 8131 | G13B_A | K17B_A | Q14B_A | E12B_A | 3.6E-06 | 6.8E-06 | 4.955E-06 | 9.208E-07 |
| 8132 | G13B_A | Y10B_A | A16B_N | S5B_A  | 1.3E-06 | 1.0E-05 | 4.960E-06 | 2.789E-06 |
| 8133 | Y10B_A | D6B_A  | F3B_A  | E18B_A | 3.2E-06 | 6.8E-06 | 4.960E-06 | 8.580E-07 |
| 8134 | S8B_A  | V7B_A  | A16B_N | T2B_A  | 1.2E-06 | 9.0E-06 | 4.965E-06 | 2.216E-06 |
| 8135 | Y10B_A | A16B_N | F19B_W | Q14B_A | 9.7E-07 | 9.4E-06 | 4.968E-06 | 2.241E-06 |
| 8136 | S8B_A  | D6B_A  | V7B_A  | G1B_A  | 3.5E-06 | 6.9E-06 | 4.970E-06 | 1.085E-06 |
| 8137 | Y10B_A | S8B_A  | T4B_A  | S9B_A  | 3.5E-06 | 6.3E-06 | 4.970E-06 | 7.385E-07 |
| 8138 | G13B_A | K17B_A | F19B_W | T4B_A  | 2.5E-06 | 8.5E-06 | 4.975E-06 | 1.632E-06 |
| 8139 | Y10B_A | S8B_A  | S9B_A  | Q14B_A | 2.7E-06 | 7.1E-06 | 4.975E-06 | 1.107E-06 |
| 8140 | S8B_A  | D6B_A  | K17B_A | F19B_W | 2.7E-06 | 7.4E-06 | 4.980E-06 | 1.413E-06 |
| 8141 | G13B_A | S8B_A  | L11B_A | T4B_A  | 2.8E-06 | 6.5E-06 | 4.985E-06 | 1.045E-06 |
| 8142 | Y10B_A | D6B_A  | A16B_N | F19B_A | 6.1E-07 | 1.1E-05 | 4.985E-06 | 2.870E-06 |
| 8143 | Y10B_A | L11B_A | F19B_A | G1B_A  | 3.1E-06 | 7.6E-06 | 4.985E-06 | 1.254E-06 |
| 8144 | Y10B_A | G1B_R  | S5B_A  | F19B_A | 2.6E-06 | 6.7E-06 | 4.985E-06 | 9.247E-07 |
| 8145 | Y10B_A | S8B_A  | F19B_W | T4B_A  | 2.5E-06 | 8.6E-06 | 4.995E-06 | 1.744E-06 |
| 8146 | Y10B_A | K17B_A | S9B_A  | G1B_A  | 3.2E-06 | 8.7E-06 | 4.995E-06 | 1.222E-06 |
| 8147 | S8B_A  | V7B_A  | A16B_N | E18B_A | 1.1E-06 | 8.6E-06 | 4.995E-06 | 1.926E-06 |
| 8148 | Y10B_A | S5B_A  | F19B_W | T4B_A  | 2.9E-06 | 9.5E-06 | 5.000E-06 | 1.532E-06 |
| 8149 | Y10B_A | E18B_T | S5B_A  | T2B_A  | 2.7E-06 | 6.6E-06 | 5.010E-06 | 1.311E-06 |
| 8150 | G13B_A | L11B_A | S5B_A  | T2B_A  | 3.1E-06 | 7.7E-06 | 5.015E-06 | 1.194E-06 |
| 8151 | Y10B_A | F3B_A  | G1B_R  | T2B_A  | 3.8E-06 | 7.2E-06 | 5.020E-06 | 1.009E-06 |
| 8152 | G13B_A | S8B_A  | G1B_R  | T4B_A  | 2.7E-06 | 8.4E-06 | 5.020E-06 | 1.690E-06 |
| 8153 | S8B_A  | D6B_A  | E18B_A | F19B_A | 3.2E-06 | 9.4E-06 | 5.025E-06 | 1.512E-06 |
| 8154 | Y10B_A | D6B_A  | V7B_A  | E18B_A | 2.6E-06 | 7.1E-06 | 5.030E-06 | 1.028E-06 |
| 8155 | Y10B_A | F3B_A  | K17B_A | E12B_A | 3.0E-06 | 1.0E-05 | 5.030E-06 | 1.670E-06 |
| 8156 | Y10B_A | V7B_A  | G1B_R  | S5B_A  | 3.4E-06 | 6.4E-06 | 5.030E-06 | 9.166E-07 |
| 8157 | G13B_A | K17B_A | T4B_A  | E12B_A | 2.8E-06 | 7.5E-06 | 5.035E-06 | 1.153E-06 |
| 8158 | Y10B_A | G13B_W | S5B_A  | T2B_A  | 2.1E-06 | 6.9E-06 | 5.035E-06 | 1.208E-06 |
| 8159 | Y10B_A | G1B_R  | K17B_A | E12B_A | 3.0E-06 | 8.3E-06 | 5.040E-06 | 1.399E-06 |
| 8160 | Y10B_A | V7B_A  | L11B_A | E18B_A | 2.8E-06 | 9.1E-06 | 5.045E-06 | 1.459E-06 |
| 8161 | G13B_A | V7B_A  | K17B_A | F19B_A | 3.5E-06 | 7.8E-06 | 5.045E-06 | 1.261E-06 |
| 8162 | Y10B_A | D6B_A  | L11B_A | E18B_A | 2.6E-06 | 7.9E-06 | 5.050E-06 | 1.147E-06 |
| 8163 | G13B_A | G1B_R  | T4B_A  | T2B_A  | 2.3E-06 | 9.2E-06 | 5.050E-06 | 1.428E-06 |

|      |        |        |        |        |         |         |           |           |
|------|--------|--------|--------|--------|---------|---------|-----------|-----------|
| 8164 | Y10B_A | E18B_A | K17B_A | S9B_A  | 3.4E-06 | 6.4E-06 | 5.055E-06 | 8.876E-07 |
| 8165 | Y10B_A | V7B_A  | F19B_A | Q14B_A | 2.7E-06 | 7.7E-06 | 5.060E-06 | 1.221E-06 |
| 8166 | Y10B_A | V7B_A  | K17B_A | F19B_W | 2.6E-06 | 8.7E-06 | 5.060E-06 | 1.510E-06 |
| 8167 | S8B_A  | D6B_A  | F3B_A  | A16B_N | 8.9E-07 | 7.8E-06 | 5.079E-06 | 1.975E-06 |
| 8168 | G13B_A | A16B_N | E18B_A | Q14B_A | 1.1E-06 | 1.2E-05 | 5.080E-06 | 3.041E-06 |
| 8169 | Y10B_A | A16B_N | K17B_A | F19B_W | 1.8E-06 | 1.1E-05 | 5.080E-06 | 2.351E-06 |
| 8170 | Y10B_A | F3B_A  | G1B_R  | S5B_A  | 3.0E-06 | 6.4E-06 | 5.085E-06 | 8.393E-07 |
| 8171 | Y10B_A | F19B_A | Q14B_A | G1B_A  | 3.1E-06 | 7.7E-06 | 5.095E-06 | 1.089E-06 |
| 8172 | Y10B_A | V7B_A  | K17B_A | E12B_A | 3.4E-06 | 7.6E-06 | 5.100E-06 | 1.163E-06 |
| 8173 | G13B_A | S8B_A  | T4B_A  | F19B_A | 3.1E-06 | 9.0E-06 | 5.100E-06 | 1.692E-06 |
| 8174 | Y10B_A | L11B_A | G1B_R  | Q14B_A | 4.0E-06 | 6.4E-06 | 5.105E-06 | 5.680E-07 |
| 8175 | G13B_A | S8B_A  | K17B_A | E12B_A | 3.4E-06 | 6.8E-06 | 5.105E-06 | 1.016E-06 |
| 8176 | S8B_A  | D6B_A  | L11B_A | E18B_A | 3.6E-06 | 7.4E-06 | 5.110E-06 | 1.035E-06 |
| 8177 | Y10B_A | V7B_A  | F3B_A  | T2B_A  | 3.0E-06 | 8.5E-06 | 5.115E-06 | 1.362E-06 |
| 8178 | S8B_A  | G13B_W | E18B_A | K17B_A | 3.3E-06 | 9.1E-06 | 5.120E-06 | 1.245E-06 |
| 8179 | Y10B_A | G1B_R  | F19B_A | T2B_A  | 2.9E-06 | 8.8E-06 | 5.125E-06 | 1.612E-06 |
| 8180 | G13B_A | F3B_A  | L11B_A | K17B_A | 3.6E-06 | 6.6E-06 | 5.125E-06 | 8.693E-07 |
| 8181 | G13B_A | F3B_A  | G1B_R  | K17B_A | 3.5E-06 | 8.5E-06 | 5.130E-06 | 1.150E-06 |
| 8182 | Y10B_A | V7B_A  | S5B_A  | F19B_A | 3.9E-06 | 7.2E-06 | 5.135E-06 | 9.664E-07 |
| 8183 | G13B_A | V7B_A  | L11B_A | K17B_A | 3.6E-06 | 6.9E-06 | 5.135E-06 | 1.027E-06 |
| 8184 | Y10B_A | F3B_A  | F19B_A | T2B_A  | 3.5E-06 | 7.7E-06 | 5.135E-06 | 1.072E-06 |
| 8185 | Y10B_A | A16B_N | E18B_T | K17B_A | 2.5E-06 | 1.2E-05 | 5.145E-06 | 2.263E-06 |
| 8186 | Y10B_A | K17B_A | F19B_A | E12B_A | 3.4E-06 | 8.1E-06 | 5.145E-06 | 1.433E-06 |
| 8187 | Y10B_A | S8B_A  | F3B_A  | L11B_A | 3.4E-06 | 6.9E-06 | 5.150E-06 | 1.156E-06 |
| 8188 | S8B_A  | V7B_A  | A16B_N | T4B_A  | 2.2E-06 | 7.7E-06 | 5.150E-06 | 1.587E-06 |
| 8189 | Y10B_A | S8B_A  | E18B_T | T4B_A  | 2.5E-06 | 9.1E-06 | 5.155E-06 | 1.782E-06 |
| 8190 | Y10B_A | S5B_A  | K17B_A | L23B_Q | 2.5E-06 | 8.8E-06 | 5.165E-06 | 1.591E-06 |
| 8191 | S8B_A  | D6B_A  | S5B_A  | E12B_A | 3.3E-06 | 7.6E-06 | 5.165E-06 | 1.323E-06 |
| 8192 | G13B_A | F3B_A  | T4B_A  | Q14B_A | 1.8E-06 | 6.9E-06 | 5.165E-06 | 1.344E-06 |
| 8193 | G13B_A | S8B_A  | V7B_A  | Q14B_A | 3.1E-06 | 6.9E-06 | 5.170E-06 | 1.281E-06 |
| 8194 | G13B_A | D6B_A  | V7B_A  | K17B_A | 3.2E-06 | 7.4E-06 | 5.170E-06 | 1.088E-06 |
| 8195 | Y10B_A | E18B_A | G1B_R  | S5B_A  | 3.1E-06 | 8.1E-06 | 5.170E-06 | 1.335E-06 |
| 8196 | G13B_A | G1B_R  | S5B_A  | Q14B_A | 3.4E-06 | 7.2E-06 | 5.175E-06 | 1.103E-06 |
| 8197 | G13B_A | L11B_A | K17B_A | F19B_A | 4.1E-06 | 1.1E-05 | 5.175E-06 | 1.523E-06 |
| 8198 | Y10B_A | S8B_A  | V7B_A  | G1B_R  | 2.9E-06 | 8.4E-06 | 5.175E-06 | 1.294E-06 |
| 8199 | Y10B_A | L11B_A | Q14B_A | G1B_A  | 3.8E-06 | 8.1E-06 | 5.175E-06 | 1.092E-06 |
| 8200 | G13B_A | T4B_A  | F19B_A | Q14B_A | 3.5E-06 | 7.3E-06 | 5.185E-06 | 1.129E-06 |
| 8201 | G13B_A | Y10B_A | S8B_A  | D6B_A  | 3.7E-06 | 7.4E-06 | 5.190E-06 | 9.284E-07 |
| 8202 | G13B_A | Y10B_A | F3B_A  | Q14B_A | 3.7E-06 | 6.9E-06 | 5.195E-06 | 8.918E-07 |
| 8203 | G13B_A | Y10B_A | S8B_A  | L11B_A | 3.1E-06 | 6.6E-06 | 5.205E-06 | 8.721E-07 |
| 8204 | Y10B_A | S8B_A  | G13B_W | Q14B_A | 3.6E-06 | 7.2E-06 | 5.205E-06 | 1.047E-06 |
| 8205 | Y10B_A | D6B_A  | V7B_A  | A16B_N | 2.1E-06 | 7.3E-06 | 5.215E-06 | 1.427E-06 |
| 8206 | Y10B_A | A16B_N | S5B_A  | G1B_A  | 1.5E-06 | 8.5E-06 | 5.220E-06 | 1.846E-06 |
| 8207 | Y10B_A | F3B_A  | G1B_R  | Q14B_A | 3.9E-06 | 7.6E-06 | 5.220E-06 | 1.080E-06 |
| 8208 | G13B_A | G1B_R  | S5B_A  | T4B_A  | 3.1E-06 | 7.2E-06 | 5.225E-06 | 9.640E-07 |
| 8209 | Y10B_A | A16B_N | G1B_R  | T2B_A  | 1.0E-06 | 9.8E-06 | 5.230E-06 | 2.723E-06 |
| 8210 | Y10B_A | V7B_A  | G1B_R  | T4B_A  | 3.2E-06 | 8.8E-06 | 5.235E-06 | 1.415E-06 |
| 8211 | Y10B_A | F3B_A  | A16B_N | T2B_A  | 2.1E-06 | 1.1E-05 | 5.235E-06 | 2.310E-06 |
| 8212 | G13B_A | D6B_A  | G1B_R  | K17B_A | 4.3E-06 | 6.9E-06 | 5.235E-06 | 9.028E-07 |
| 8213 | G13B_A | S5B_A  | Q14B_A | G1B_A  | 3.3E-06 | 8.0E-06 | 5.235E-06 | 1.022E-06 |
| 8214 | G13B_A | A16B_N | K17B_A | G1B_A  | 1.4E-06 | 9.0E-06 | 5.240E-06 | 2.303E-06 |
| 8215 | G13B_A | V7B_A  | K17B_A | G1B_A  | 3.6E-06 | 9.6E-06 | 5.245E-06 | 1.384E-06 |

|      |        |        |        |        |         |         |           |           |
|------|--------|--------|--------|--------|---------|---------|-----------|-----------|
| 8216 | Y10B_A | D6B_A  | E18B_A | F19B_A | 2.7E-06 | 1.3E-05 | 5.245E-06 | 2.188E-06 |
| 8217 | S8B_A  | D6B_A  | G1B_R  | Q14B_A | 3.6E-06 | 8.1E-06 | 5.250E-06 | 1.244E-06 |
| 8218 | G13B_A | T4B_A  | F19B_A | T2B_A  | 3.1E-06 | 8.1E-06 | 5.255E-06 | 1.318E-06 |
| 8219 | Y10B_A | S8B_A  | S5B_A  | S9B_A  | 3.7E-06 | 8.8E-06 | 5.260E-06 | 1.367E-06 |
| 8220 | G13B_A | S8B_A  | S5B_A  | F19B_A | 3.5E-06 | 8.1E-06 | 5.260E-06 | 1.279E-06 |
| 8221 | S8B_A  | V7B_A  | F3B_A  | T2B_A  | 2.8E-06 | 7.7E-06 | 5.260E-06 | 1.368E-06 |
| 8222 | Y10B_A | F3B_A  | G1B_R  | T4B_A  | 3.4E-06 | 8.8E-06 | 5.260E-06 | 1.162E-06 |
| 8223 | G13B_A | E18B_A | G1B_R  | K17B_A | 3.5E-06 | 6.9E-06 | 5.265E-06 | 1.026E-06 |
| 8224 | G13B_A | V7B_A  | E18B_A | Q14B_A | 3.5E-06 | 1.1E-05 | 5.265E-06 | 1.734E-06 |
| 8225 | Y10B_A | E18B_A | K17B_A | F19B_W | 3.9E-06 | 7.3E-06 | 5.265E-06 | 9.230E-07 |
| 8226 | Y10B_A | G13B_W | T4B_A  | T2B_A  | 2.6E-06 | 6.9E-06 | 5.270E-06 | 1.066E-06 |
| 8227 | S8B_A  | D6B_A  | E18B_A | G1B_A  | 3.6E-06 | 1.1E-05 | 5.270E-06 | 1.616E-06 |
| 8228 | G13B_A | V7B_A  | F3B_A  | K17B_A | 4.3E-06 | 8.1E-06 | 5.270E-06 | 9.504E-07 |
| 8229 | S8B_A  | D6B_A  | K17B_A | E12B_A | 3.3E-06 | 1.0E-05 | 5.270E-06 | 1.548E-06 |
| 8230 | Y10B_A | A16B_N | K17B_A | E12B_A | 1.6E-06 | 1.6E-05 | 5.275E-06 | 3.236E-06 |
| 8231 | G13B_A | V7B_A  | G1B_R  | K17B_A | 2.3E-06 | 1.2E-05 | 5.280E-06 | 1.976E-06 |
| 8232 | Y10B_A | Q14B_A | T2B_A  | E12B_A | 3.6E-06 | 8.3E-06 | 5.280E-06 | 1.113E-06 |
| 8233 | Y10B_A | D6B_A  | A16B_N | E18B_A | 1.1E-06 | 7.9E-06 | 5.285E-06 | 1.965E-06 |
| 8234 | Y10B_A | D6B_A  | E18B_A | G1B_R  | 3.1E-06 | 8.2E-06 | 5.285E-06 | 1.365E-06 |
| 8235 | Y10B_A | V7B_A  | F3B_A  | Q14B_A | 4.3E-06 | 9.9E-06 | 5.285E-06 | 1.301E-06 |
| 8236 | G13B_A | S8B_A  | G1B_R  | S5B_A  | 3.6E-06 | 7.5E-06 | 5.290E-06 | 1.078E-06 |
| 8237 | G13B_A | V7B_A  | S5B_A  | T2B_A  | 2.8E-06 | 6.9E-06 | 5.295E-06 | 1.010E-06 |
| 8238 | Y10B_A | S5B_A  | T4B_A  | E12B_A | 3.4E-06 | 7.2E-06 | 5.295E-06 | 9.081E-07 |
| 8239 | Y10B_A | L11B_A | F19B_A | T2B_A  | 3.1E-06 | 8.6E-06 | 5.295E-06 | 1.413E-06 |
| 8240 | Y10B_A | S8B_A  | L11B_A | G1B_A  | 3.4E-06 | 8.5E-06 | 5.300E-06 | 1.098E-06 |
| 8241 | Y10B_A | S8B_A  | A16B_N | G1B_R  | 1.4E-06 | 8.4E-06 | 5.305E-06 | 2.115E-06 |
| 8242 | Y10B_A | A16B_N | L11B_A | F19B_A | 2.3E-06 | 1.1E-05 | 5.305E-06 | 2.025E-06 |
| 8243 | S8B_A  | V7B_A  | F3B_A  | Q14B_A | 3.7E-06 | 7.7E-06 | 5.310E-06 | 9.738E-07 |
| 8244 | G13B_A | Y10B_A | S8B_A  | G1B_A  | 3.1E-06 | 7.7E-06 | 5.310E-06 | 1.069E-06 |
| 8245 | G13B_A | K17B_A | T2B_A  | E12B_A | 3.8E-06 | 7.9E-06 | 5.315E-06 | 1.244E-06 |
| 8246 | G13B_A | G1B_R  | Q14B_A | T2B_A  | 2.9E-06 | 7.2E-06 | 5.315E-06 | 1.141E-06 |
| 8247 | G13B_A | Y10B_A | A16B_N | T2B_A  | 1.8E-06 | 8.9E-06 | 5.320E-06 | 2.050E-06 |
| 8248 | Y10B_A | A16B_N | L11B_A | T2B_A  | 1.4E-06 | 7.6E-06 | 5.320E-06 | 2.154E-06 |
| 8249 | G13B_A | D6B_A  | K17B_A | F19B_A | 3.2E-06 | 9.9E-06 | 5.325E-06 | 1.484E-06 |
| 8250 | G13B_A | D6B_A  | E18B_A | T2B_A  | 2.9E-06 | 7.9E-06 | 5.325E-06 | 1.254E-06 |
| 8251 | G13B_A | A16B_N | E18B_A | T4B_A  | 1.9E-06 | 7.0E-06 | 5.330E-06 | 1.463E-06 |
| 8252 | Y10B_A | D6B_A  | K17B_A | F19B_W | 2.3E-06 | 9.1E-06 | 5.330E-06 | 1.922E-06 |
| 8253 | G13B_A | A16B_N | L11B_A | K17B_A | 1.7E-06 | 9.0E-06 | 5.335E-06 | 1.914E-06 |
| 8254 | Y10B_A | F3B_A  | L11B_A | S5B_A  | 3.1E-06 | 6.9E-06 | 5.335E-06 | 9.292E-07 |
| 8255 | Y10B_A | D6B_A  | K17B_A | S9B_A  | 3.4E-06 | 7.9E-06 | 5.335E-06 | 1.245E-06 |
| 8256 | Y10B_A | V7B_A  | T4B_A  | F19B_A | 3.1E-06 | 7.8E-06 | 5.350E-06 | 1.193E-06 |
| 8257 | Y10B_A | F19B_W | T4B_A  | Q14B_A | 2.5E-06 | 8.5E-06 | 5.350E-06 | 1.525E-06 |
| 8258 | G13B_A | S8B_A  | T2B_A  | G1B_A  | 3.6E-06 | 7.7E-06 | 5.350E-06 | 1.016E-06 |
| 8259 | S8B_A  | V7B_A  | F3B_A  | T4B_A  | 3.1E-06 | 6.9E-06 | 5.355E-06 | 1.113E-06 |
| 8260 | Y10B_A | F3B_A  | S5B_A  | F19B_A | 3.6E-06 | 9.5E-06 | 5.355E-06 | 1.326E-06 |
| 8261 | Y10B_A | T4B_A  | Q14B_A | E12B_A | 4.0E-06 | 8.9E-06 | 5.355E-06 | 1.130E-06 |
| 8262 | S8B_A  | D6B_A  | F3B_A  | E18B_A | 2.7E-06 | 7.9E-06 | 5.355E-06 | 1.339E-06 |
| 8263 | G13B_A | V7B_A  | A16B_N | K17B_A | 9.3E-07 | 1.2E-05 | 5.356E-06 | 2.382E-06 |
| 8264 | G13B_A | S5B_A  | F19B_A | Q14B_A | 3.5E-06 | 9.5E-06 | 5.360E-06 | 1.307E-06 |
| 8265 | S8B_A  | D6B_A  | F3B_A  | Q14B_A | 3.3E-06 | 8.7E-06 | 5.360E-06 | 1.441E-06 |
| 8266 | Y10B_A | S8B_A  | F3B_A  | G1B_R  | 2.7E-06 | 8.4E-06 | 5.365E-06 | 1.327E-06 |
| 8267 | S8B_A  | D6B_A  | K17B_A | S9B_A  | 4.0E-06 | 1.1E-05 | 5.365E-06 | 1.778E-06 |



|      |        |        |        |        |         |         |           |           |
|------|--------|--------|--------|--------|---------|---------|-----------|-----------|
| 8268 | Y10B_A | F3B_A  | T4B_A  | F19B_A | 3.1E-06 | 7.7E-06 | 5.370E-06 | 1.366E-06 |
| 8269 | Y10B_A | S8B_A  | S5B_A  | F19B_W | 3.3E-06 | 9.9E-06 | 5.370E-06 | 1.429E-06 |
| 8270 | Y10B_A | K17B_A | T4B_A  | F19B_Q | 3.1E-06 | 8.6E-06 | 5.375E-06 | 1.688E-06 |
| 8271 | Y10B_A | V7B_A  | S5B_A  | G1B_A  | 4.0E-06 | 8.5E-06 | 5.375E-06 | 1.369E-06 |
| 8272 | Y10B_A | F3B_A  | F19B_A | Q14B_A | 3.6E-06 | 8.1E-06 | 5.380E-06 | 1.228E-06 |
| 8273 | Y10B_A | F3B_A  | L11B_A | T4B_A  | 3.6E-06 | 8.1E-06 | 5.385E-06 | 1.171E-06 |
| 8274 | G13B_A | S8B_A  | L11B_A | S5B_A  | 3.1E-06 | 7.7E-06 | 5.385E-06 | 1.304E-06 |
| 8275 | Y10B_A | S8B_A  | D6B_A  | G1B_R  | 4.0E-06 | 7.2E-06 | 5.385E-06 | 9.599E-07 |
| 8276 | G13B_A | S8B_A  | V7B_A  | S5B_A  | 3.6E-06 | 8.1E-06 | 5.390E-06 | 1.152E-06 |
| 8277 | Y10B_A | S8B_A  | G13B_W | T4B_A  | 3.2E-06 | 9.9E-06 | 5.390E-06 | 1.614E-06 |
| 8278 | Y10B_A | A16B_N | F19B_A | T2B_A  | 1.8E-06 | 1.0E-05 | 5.400E-06 | 2.258E-06 |
| 8279 | G13B_A | Y10B_A | F3B_A  | T4B_A  | 3.8E-06 | 8.1E-06 | 5.400E-06 | 1.070E-06 |
| 8280 | S8B_A  | D6B_A  | G1B_R  | T4B_A  | 4.3E-06 | 6.9E-06 | 5.405E-06 | 8.727E-07 |
| 8281 | Y10B_A | S8B_A  | E18B_A | G1B_R  | 4.3E-06 | 6.9E-06 | 5.405E-06 | 7.458E-07 |
| 8282 | Y10B_A | K17B_A | F19B_Q | T2B_A  | 2.3E-06 | 1.2E-05 | 5.410E-06 | 2.154E-06 |
| 8283 | G13B_A | D6B_A  | F3B_A  | K17B_A | 3.2E-06 | 1.1E-05 | 5.410E-06 | 1.726E-06 |
| 8284 | G13B_A | Y10B_A | F3B_A  | S5B_A  | 2.9E-06 | 8.1E-06 | 5.415E-06 | 1.291E-06 |
| 8285 | Y10B_A | F19B_W | Q14B_A | T2B_A  | 2.9E-06 | 8.5E-06 | 5.415E-06 | 1.943E-06 |
| 8286 | S8B_A  | D6B_A  | A16B_N | F19B_A | 1.0E-06 | 8.3E-06 | 5.415E-06 | 2.064E-06 |
| 8287 | Y10B_A | S8B_A  | F19B_A | G1B_A  | 3.6E-06 | 8.1E-06 | 5.420E-06 | 1.202E-06 |
| 8288 | G13B_A | Y10B_A | G1B_R  | T2B_A  | 3.3E-06 | 8.4E-06 | 5.425E-06 | 1.203E-06 |
| 8289 | G13B_A | V7B_A  | E18B_A | K17B_A | 2.7E-06 | 7.4E-06 | 5.425E-06 | 1.238E-06 |
| 8290 | G13B_A | Y10B_A | G1B_R  | S5B_A  | 3.4E-06 | 9.3E-06 | 5.425E-06 | 1.309E-06 |
| 8291 | G13B_A | S8B_A  | F3B_A  | Q14B_A | 2.6E-06 | 8.5E-06 | 5.425E-06 | 1.340E-06 |
| 8292 | Y10B_A | S8B_A  | F19B_W | T2B_A  | 3.6E-06 | 8.5E-06 | 5.430E-06 | 1.351E-06 |
| 8293 | G13B_A | V7B_A  | S5B_A  | T4B_A  | 3.6E-06 | 7.7E-06 | 5.430E-06 | 1.026E-06 |
| 8294 | G13B_A | S5B_A  | K17B_A | E12B_A | 3.6E-06 | 7.6E-06 | 5.435E-06 | 1.097E-06 |
| 8295 | Y10B_A | L11B_A | G1B_R  | S5B_A  | 4.0E-06 | 7.1E-06 | 5.435E-06 | 9.890E-07 |
| 8296 | Y10B_A | D6B_A  | K17B_A | E12B_A | 2.5E-06 | 9.1E-06 | 5.440E-06 | 1.508E-06 |
| 8297 | G13B_A | V7B_A  | T4B_A  | T2B_A  | 4.1E-06 | 6.9E-06 | 5.440E-06 | 8.274E-07 |
| 8298 | G13B_A | G1B_R  | S5B_A  | T2B_A  | 2.9E-06 | 8.8E-06 | 5.440E-06 | 1.452E-06 |
| 8299 | Y10B_A | V7B_A  | Q14B_A | G1B_A  | 3.1E-06 | 8.1E-06 | 5.450E-06 | 1.247E-06 |
| 8300 | Y10B_A | S8B_A  | V7B_A  | F3B_A  | 4.3E-06 | 8.5E-06 | 5.455E-06 | 1.086E-06 |
| 8301 | Y10B_A | G1B_R  | F19B_A | Q14B_A | 3.5E-06 | 8.4E-06 | 5.455E-06 | 1.282E-06 |
| 8302 | G13B_A | T4B_A  | T2B_A  | G1B_A  | 3.6E-06 | 8.1E-06 | 5.455E-06 | 1.257E-06 |
| 8303 | Y10B_A | D6B_A  | G1B_R  | Q14B_A | 3.8E-06 | 7.7E-06 | 5.455E-06 | 9.875E-07 |
| 8304 | G13B_A | Y10B_A | L11B_A | Q14B_A | 2.2E-06 | 8.1E-06 | 5.470E-06 | 1.342E-06 |
| 8305 | G13B_A | S8B_A  | Q14B_A | G1B_A  | 3.6E-06 | 7.6E-06 | 5.470E-06 | 1.021E-06 |
| 8306 | G13B_A | Y10B_A | D6B_A  | E18B_A | 3.3E-06 | 9.8E-06 | 5.485E-06 | 1.474E-06 |
| 8307 | Y10B_A | S8B_A  | K17B_A | F19B_Q | 3.0E-06 | 1.1E-05 | 5.485E-06 | 2.054E-06 |
| 8308 | Y10B_A | S5B_A  | T2B_A  | E12B_A | 2.0E-06 | 1.0E-05 | 5.490E-06 | 1.641E-06 |
| 8309 | Y10B_A | E18B_A | G1B_R  | Q14B_A | 4.1E-06 | 7.7E-06 | 5.490E-06 | 9.679E-07 |
| 8310 | Y10B_A | T4B_A  | F19B_A | G1B_A  | 3.6E-06 | 9.5E-06 | 5.490E-06 | 1.610E-06 |
| 8311 | Y10B_A | F3B_A  | Q14B_A | G1B_A  | 3.6E-06 | 9.9E-06 | 5.495E-06 | 1.355E-06 |
| 8312 | Y10B_A | S8B_A  | T4B_A  | E12B_A | 4.0E-06 | 1.3E-05 | 5.500E-06 | 1.934E-06 |
| 8313 | G13B_A | Y10B_A | E18B_A | T4B_A  | 3.7E-06 | 9.5E-06 | 5.505E-06 | 1.318E-06 |
| 8314 | Y10B_A | E18B_A | G1B_R  | T2B_A  | 3.5E-06 | 6.9E-06 | 5.510E-06 | 9.872E-07 |
| 8315 | Y10B_A | T4B_A  | T2B_A  | E12B_A | 2.8E-06 | 9.9E-06 | 5.520E-06 | 1.658E-06 |
| 8316 | G13B_A | D6B_A  | Q14B_A | T2B_A  | 3.9E-06 | 7.4E-06 | 5.525E-06 | 8.908E-07 |
| 8317 | Y10B_A | D6B_A  | S5B_A  | F19B_A | 2.7E-06 | 7.4E-06 | 5.525E-06 | 1.319E-06 |
| 8318 | Y10B_A | V7B_A  | T4B_A  | G1B_A  | 3.6E-06 | 1.0E-05 | 5.525E-06 | 1.493E-06 |
| 8319 | G13B_A | L11B_A | K17B_A | G1B_A  | 3.5E-06 | 9.1E-06 | 5.535E-06 | 1.243E-06 |

|      |        |        |        |        |         |         |           |           |
|------|--------|--------|--------|--------|---------|---------|-----------|-----------|
| 8320 | Y10B_A | S8B_A  | V7B_A  | F19B_A | 3.6E-06 | 9.5E-06 | 5.535E-06 | 1.576E-06 |
| 8321 | Y10B_A | V7B_A  | A16B_N | T2B_A  | 1.0E-06 | 9.0E-06 | 5.540E-06 | 2.292E-06 |
| 8322 | Y10B_A | A16B_N | L11B_A | Q14B_A | 2.4E-06 | 9.0E-06 | 5.540E-06 | 1.825E-06 |
| 8323 | G13B_A | S8B_A  | V7B_A  | T2B_A  | 2.9E-06 | 8.1E-06 | 5.545E-06 | 1.481E-06 |
| 8324 | S8B_A  | G13B_W | Q14B_A | T2B_A  | 4.1E-06 | 8.4E-06 | 5.545E-06 | 1.329E-06 |
| 8325 | G13B_A | K17B_A | F19B_A | G1B_A  | 4.1E-06 | 7.4E-06 | 5.545E-06 | 1.010E-06 |
| 8326 | Y10B_A | S8B_A  | Q14B_A | E12B_A | 3.4E-06 | 8.5E-06 | 5.545E-06 | 1.215E-06 |
| 8327 | G13B_A | L11B_A | T4B_A  | Q14B_A | 4.2E-06 | 7.2E-06 | 5.550E-06 | 8.906E-07 |
| 8328 | Y10B_A | L11B_A | G1B_R  | T2B_A  | 4.0E-06 | 7.9E-06 | 5.550E-06 | 1.201E-06 |
| 8329 | G13B_A | S8B_A  | F3B_A  | T2B_A  | 3.4E-06 | 9.9E-06 | 5.550E-06 | 1.626E-06 |
| 8330 | G13B_A | A16B_N | S5B_A  | Q14B_A | 1.8E-06 | 9.6E-06 | 5.555E-06 | 2.115E-06 |
| 8331 | S8B_A  | D6B_A  | G1B_R  | T2B_A  | 3.6E-06 | 7.7E-06 | 5.555E-06 | 1.216E-06 |
| 8332 | G13B_A | S8B_A  | D6B_A  | E18B_A | 3.5E-06 | 9.8E-06 | 5.555E-06 | 1.526E-06 |
| 8333 | G13B_A | Y10B_A | L11B_A | T4B_A  | 4.3E-06 | 8.1E-06 | 5.555E-06 | 1.047E-06 |
| 8334 | Y10B_A | V7B_A  | L11B_A | T4B_A  | 2.9E-06 | 8.1E-06 | 5.560E-06 | 1.416E-06 |
| 8335 | S8B_A  | D6B_A  | G1B_R  | S5B_A  | 3.6E-06 | 9.5E-06 | 5.565E-06 | 1.600E-06 |
| 8336 | G13B_A | Y10B_A | V7B_A  | S5B_A  | 4.3E-06 | 6.6E-06 | 5.565E-06 | 6.011E-07 |
| 8337 | S8B_A  | D6B_A  | F19B_A | Q14B_A | 3.7E-06 | 9.7E-06 | 5.570E-06 | 1.315E-06 |
| 8338 | Y10B_A | F3B_A  | T2B_A  | G1B_A  | 3.5E-06 | 9.1E-06 | 5.575E-06 | 1.309E-06 |
| 8339 | G13B_A | S8B_A  | L11B_A | Q14B_A | 3.6E-06 | 9.5E-06 | 5.575E-06 | 1.385E-06 |
| 8340 | G13B_A | D6B_A  | L11B_A | K17B_A | 3.9E-06 | 7.4E-06 | 5.580E-06 | 9.903E-07 |
| 8341 | G13B_A | Y10B_A | F19B_A | Q14B_A | 3.6E-06 | 1.1E-05 | 5.585E-06 | 1.746E-06 |
| 8342 | Y10B_A | F3B_A  | L11B_A | T2B_A  | 3.4E-06 | 9.5E-06 | 5.590E-06 | 1.559E-06 |
| 8343 | G13B_A | Y10B_A | G1B_R  | T4B_A  | 4.0E-06 | 9.9E-06 | 5.590E-06 | 1.587E-06 |
| 8344 | G13B_A | S8B_A  | F19B_A | T2B_A  | 4.1E-06 | 7.7E-06 | 5.595E-06 | 1.028E-06 |
| 8345 | Y10B_A | V7B_A  | L11B_A | Q14B_A | 4.1E-06 | 9.1E-06 | 5.600E-06 | 1.301E-06 |
| 8346 | G13B_A | Y10B_A | S5B_A  | G1B_A  | 2.2E-06 | 9.1E-06 | 5.605E-06 | 1.563E-06 |
| 8347 | Y10B_A | D6B_A  | G1B_R  | S5B_A  | 2.8E-06 | 7.7E-06 | 5.605E-06 | 1.320E-06 |
| 8348 | S8B_A  | D6B_A  | V7B_A  | S5B_A  | 3.2E-06 | 7.4E-06 | 5.605E-06 | 9.081E-07 |
| 8349 | G13B_A | F3B_A  | K17B_A | G1B_A  | 3.6E-06 | 8.1E-06 | 5.610E-06 | 1.265E-06 |
| 8350 | G13B_A | Y10B_A | S8B_A  | G1B_R  | 3.4E-06 | 1.0E-05 | 5.625E-06 | 1.509E-06 |
| 8351 | Y10B_A | L11B_A | S5B_A  | F19B_A | 3.5E-06 | 1.1E-05 | 5.630E-06 | 1.819E-06 |
| 8352 | Y10B_A | S8B_A  | A16B_N | L11B_A | 1.8E-06 | 9.0E-06 | 5.635E-06 | 2.094E-06 |
| 8353 | Y10B_A | S8B_A  | F3B_A  | G1B_A  | 3.6E-06 | 9.9E-06 | 5.635E-06 | 1.528E-06 |
| 8354 | Y10B_A | F3B_A  | T4B_A  | G1B_A  | 3.6E-06 | 1.1E-05 | 5.635E-06 | 1.538E-06 |
| 8355 | Y10B_A | A16B_N | L11B_A | S5B_A  | 2.2E-06 | 1.0E-05 | 5.640E-06 | 1.942E-06 |
| 8356 | Y10B_A | L11B_A | F19B_A | Q14B_A | 3.6E-06 | 1.0E-05 | 5.640E-06 | 1.583E-06 |
| 8357 | G13B_A | Y10B_A | E18B_A | T2B_A  | 3.2E-06 | 9.7E-06 | 5.645E-06 | 1.716E-06 |
| 8358 | Y10B_A | S5B_A  | F19B_A | G1B_A  | 2.5E-06 | 9.5E-06 | 5.650E-06 | 1.755E-06 |
| 8359 | Y10B_A | S8B_A  | T2B_A  | E12B_A | 3.3E-06 | 8.9E-06 | 5.650E-06 | 1.640E-06 |
| 8360 | Y10B_A | S5B_A  | K17B_A | S9B_A  | 4.0E-06 | 7.9E-06 | 5.655E-06 | 1.058E-06 |
| 8361 | Y10B_A | V7B_A  | E18B_A | T2B_A  | 3.9E-06 | 7.4E-06 | 5.665E-06 | 1.037E-06 |
| 8362 | Y10B_A | E18B_A | K17B_A | E12B_A | 3.6E-06 | 8.6E-06 | 5.665E-06 | 1.453E-06 |
| 8363 | Y10B_A | D6B_A  | F3B_A  | T4B_A  | 3.9E-06 | 7.4E-06 | 5.665E-06 | 1.173E-06 |
| 8364 | Y10B_A | L11B_A | T2B_A  | G1B_A  | 3.1E-06 | 9.1E-06 | 5.670E-06 | 1.717E-06 |
| 8365 | Y10B_A | D6B_A  | G1B_R  | T4B_A  | 4.2E-06 | 6.9E-06 | 5.670E-06 | 7.760E-07 |
| 8366 | Y10B_A | L11B_A | T4B_A  | G1B_A  | 4.3E-06 | 1.1E-05 | 5.670E-06 | 1.424E-06 |
| 8367 | G13B_A | S8B_A  | T4B_A  | G1B_A  | 3.6E-06 | 9.5E-06 | 5.670E-06 | 1.470E-06 |
| 8368 | G13B_A | D6B_A  | E18B_A | Q14B_A | 3.7E-06 | 8.7E-06 | 5.670E-06 | 1.279E-06 |
| 8369 | Y10B_A | L11B_A | G1B_R  | T4B_A  | 3.4E-06 | 9.2E-06 | 5.675E-06 | 1.627E-06 |
| 8370 | G13B_A | F3B_A  | S5B_A  | T2B_A  | 3.6E-06 | 9.1E-06 | 5.675E-06 | 1.193E-06 |
| 8371 | Y10B_A | A16B_N | T4B_A  | G1B_A  | 1.1E-06 | 8.2E-06 | 5.680E-06 | 2.239E-06 |

|      |        |        |        |        |         |         |           |           |
|------|--------|--------|--------|--------|---------|---------|-----------|-----------|
| 8372 | G13B_A | L11B_A | S5B_A  | Q14B_A | 3.6E-06 | 8.1E-06 | 5.680E-06 | 1.476E-06 |
| 8373 | G13B_A | D6B_A  | S5B_A  | T4B_A  | 4.4E-06 | 7.4E-06 | 5.680E-06 | 8.551E-07 |
| 8374 | G13B_A | S8B_A  | V7B_A  | T4B_A  | 2.9E-06 | 9.1E-06 | 5.685E-06 | 1.738E-06 |
| 8375 | G13B_A | D6B_A  | A16B_N | K17B_A | 2.9E-06 | 8.8E-06 | 5.685E-06 | 1.601E-06 |
| 8376 | Y10B_A | S5B_A  | Q14B_A | E12B_A | 4.0E-06 | 7.6E-06 | 5.690E-06 | 1.088E-06 |
| 8377 | Y10B_A | E18B_A | F19B_A | T2B_A  | 2.7E-06 | 9.7E-06 | 5.690E-06 | 1.816E-06 |
| 8378 | G13B_A | S8B_A  | S5B_A  | G1B_A  | 3.6E-06 | 9.1E-06 | 5.695E-06 | 1.369E-06 |
| 8379 | Y10B_A | V7B_A  | F3B_A  | S5B_A  | 3.4E-06 | 9.1E-06 | 5.695E-06 | 1.440E-06 |
| 8380 | Y10B_A | S8B_A  | D6B_A  | A16B_N | 1.4E-06 | 1.3E-05 | 5.700E-06 | 3.122E-06 |
| 8381 | Y10B_A | G1B_R  | T4B_A  | F19B_A | 3.8E-06 | 9.3E-06 | 5.700E-06 | 1.304E-06 |
| 8382 | G13B_A | S8B_A  | G1B_R  | T2B_A  | 4.4E-06 | 7.9E-06 | 5.700E-06 | 9.442E-07 |
| 8383 | Y10B_A | V7B_A  | G1B_R  | Q14B_A | 4.4E-06 | 1.1E-05 | 5.705E-06 | 1.493E-06 |
| 8384 | Y10B_A | S8B_A  | F3B_A  | A16B_N | 1.5E-06 | 9.0E-06 | 5.705E-06 | 2.205E-06 |
| 8385 | G13B_A | Y10B_A | D6B_A  | T2B_A  | 3.3E-06 | 9.7E-06 | 5.705E-06 | 1.303E-06 |
| 8386 | G13B_A | Y10B_A | V7B_A  | Q14B_A | 3.6E-06 | 9.5E-06 | 5.705E-06 | 1.303E-06 |
| 8387 | G13B_A | S5B_A  | F19B_A | T2B_A  | 3.6E-06 | 1.3E-05 | 5.705E-06 | 2.208E-06 |
| 8388 | G13B_A | F3B_A  | K17B_A | F19B_A | 3.5E-06 | 7.8E-06 | 5.710E-06 | 1.199E-06 |
| 8389 | G13B_A | A16B_N | S5B_A  | T4B_A  | 1.4E-06 | 1.1E-05 | 5.710E-06 | 2.484E-06 |
| 8390 | G13B_A | E18B_A | K17B_A | F19B_A | 3.9E-06 | 7.5E-06 | 5.710E-06 | 1.211E-06 |
| 8391 | S8B_A  | V7B_A  | F3B_A  | S5B_A  | 3.6E-06 | 1.2E-05 | 5.710E-06 | 1.827E-06 |
| 8392 | G13B_A | F3B_A  | S5B_A  | Q14B_A | 4.3E-06 | 7.2E-06 | 5.715E-06 | 8.331E-07 |
| 8393 | Y10B_A | S8B_A  | V7B_A  | G1B_A  | 3.8E-06 | 7.7E-06 | 5.720E-06 | 1.275E-06 |
| 8394 | G13B_A | F3B_A  | T4B_A  | T2B_A  | 3.4E-06 | 8.4E-06 | 5.720E-06 | 1.525E-06 |
| 8395 | Y10B_A | E18B_A | G1B_R  | T4B_A  | 4.5E-06 | 9.1E-06 | 5.725E-06 | 1.035E-06 |
| 8396 | G13B_A | E18B_A | Q14B_A | T2B_A  | 3.9E-06 | 9.1E-06 | 5.725E-06 | 1.482E-06 |
| 8397 | S8B_A  | D6B_A  | V7B_A  | T2B_A  | 3.6E-06 | 8.3E-06 | 5.725E-06 | 1.226E-06 |
| 8398 | G13B_A | Y10B_A | S8B_A  | A16B_N | 1.6E-06 | 1.1E-05 | 5.740E-06 | 2.224E-06 |
| 8399 | Y10B_A | S8B_A  | S5B_A  | E12B_A | 4.0E-06 | 1.0E-05 | 5.745E-06 | 1.530E-06 |
| 8400 | S8B_A  | G13B_W | K17B_A | Q14B_A | 3.5E-06 | 9.1E-06 | 5.745E-06 | 1.403E-06 |
| 8401 | G13B_A | Y10B_A | L11B_A | T2B_A  | 2.9E-06 | 1.1E-05 | 5.745E-06 | 1.785E-06 |
| 8402 | G13B_A | S8B_A  | F3B_A  | T4B_A  | 4.3E-06 | 7.7E-06 | 5.755E-06 | 9.827E-07 |
| 8403 | G13B_A | E18B_A | S5B_A  | Q14B_A | 3.9E-06 | 7.4E-06 | 5.755E-06 | 9.156E-07 |
| 8404 | Y10B_A | E18B_A | T4B_A  | F19B_A | 2.4E-06 | 8.6E-06 | 5.765E-06 | 1.517E-06 |
| 8405 | G13B_A | S8B_A  | A16B_N | T4B_A  | 2.2E-06 | 1.0E-05 | 5.765E-06 | 2.522E-06 |
| 8406 | Y10B_A | F3B_A  | S5B_A  | G1B_A  | 3.1E-06 | 8.6E-06 | 5.765E-06 | 1.627E-06 |
| 8407 | G13B_A | Y10B_A | S8B_A  | V7B_A  | 3.6E-06 | 7.8E-06 | 5.765E-06 | 1.205E-06 |
| 8408 | G13B_A | F3B_A  | Q14B_A | T2B_A  | 4.3E-06 | 8.1E-06 | 5.765E-06 | 1.247E-06 |
| 8409 | G13B_A | Y10B_A | T2B_A  | G1B_A  | 3.8E-06 | 9.9E-06 | 5.770E-06 | 1.555E-06 |
| 8410 | G13B_A | Y10B_A | Q14B_A | G1B_A  | 3.6E-06 | 7.8E-06 | 5.770E-06 | 1.156E-06 |
| 8411 | Y10B_A | D6B_A  | V7B_A  | T2B_A  | 3.7E-06 | 7.8E-06 | 5.770E-06 | 1.218E-06 |
| 8412 | G13B_A | S5B_A  | T2B_A  | G1B_A  | 3.6E-06 | 9.0E-06 | 5.770E-06 | 1.313E-06 |
| 8413 | Y10B_A | G13B_W | K17B_A | T2B_A  | 4.0E-06 | 8.0E-06 | 5.775E-06 | 1.178E-06 |
| 8414 | Y10B_A | D6B_A  | F3B_A  | T2B_A  | 2.7E-06 | 7.4E-06 | 5.775E-06 | 1.299E-06 |
| 8415 | G13B_A | Y10B_A | V7B_A  | T2B_A  | 3.6E-06 | 9.9E-06 | 5.780E-06 | 1.554E-06 |
| 8416 | Y10B_A | F19B_W | T4B_A  | T2B_A  | 3.6E-06 | 1.1E-05 | 5.780E-06 | 1.857E-06 |
| 8417 | G13B_A | V7B_A  | Q14B_A | T2B_A  | 3.5E-06 | 8.1E-06 | 5.790E-06 | 1.144E-06 |
| 8418 | Y10B_A | S8B_A  | K17B_A | S9B_A  | 3.5E-06 | 9.3E-06 | 5.790E-06 | 1.288E-06 |
| 8419 | G13B_A | Y10B_A | V7B_A  | T4B_A  | 2.9E-06 | 7.8E-06 | 5.790E-06 | 1.415E-06 |
| 8420 | G13B_A | Y10B_A | F3B_A  | T2B_A  | 3.6E-06 | 9.5E-06 | 5.795E-06 | 1.310E-06 |
| 8421 | S8B_A  | D6B_A  | Q14B_A | G1B_A  | 3.9E-06 | 8.7E-06 | 5.795E-06 | 1.463E-06 |
| 8422 | Y10B_A | S8B_A  | A16B_N | G1B_A  | 1.3E-06 | 8.6E-06 | 5.800E-06 | 2.099E-06 |
| 8423 | G13B_A | L11B_A | S5B_A  | T4B_A  | 4.2E-06 | 7.7E-06 | 5.800E-06 | 1.036E-06 |

|      |        |        |        |        |         |         |           |           |
|------|--------|--------|--------|--------|---------|---------|-----------|-----------|
| 8424 | G13B_A | S8B_A  | E18B_A | T4B_A  | 3.7E-06 | 9.1E-06 | 5.800E-06 | 1.396E-06 |
| 8425 | Y10B_A | A16B_N | F19B_A | Q14B_A | 2.1E-06 | 1.2E-05 | 5.805E-06 | 2.845E-06 |
| 8426 | S8B_A  | D6B_A  | T4B_A  | G1B_A  | 2.4E-06 | 9.7E-06 | 5.805E-06 | 1.696E-06 |
| 8427 | Y10B_A | K17B_A | F19B_W | T4B_A  | 2.8E-06 | 1.0E-05 | 5.805E-06 | 1.598E-06 |
| 8428 | G13B_A | F3B_A  | S5B_A  | T4B_A  | 2.6E-06 | 8.2E-06 | 5.810E-06 | 1.519E-06 |
| 8429 | S8B_A  | D6B_A  | F3B_A  | S5B_A  | 3.5E-06 | 8.7E-06 | 5.810E-06 | 1.493E-06 |
| 8430 | Y10B_A | E18B_A | T4B_A  | G1B_A  | 3.9E-06 | 8.7E-06 | 5.820E-06 | 1.039E-06 |
| 8431 | G13B_A | D6B_A  | T4B_A  | T2B_A  | 4.6E-06 | 7.8E-06 | 5.825E-06 | 8.656E-07 |
| 8432 | G13B_A | F3B_A  | E18B_A | K17B_A | 3.9E-06 | 9.8E-06 | 5.825E-06 | 1.711E-06 |
| 8433 | Y10B_A | A16B_N | L11B_A | T4B_A  | 1.7E-06 | 1.0E-05 | 5.830E-06 | 2.061E-06 |
| 8434 | Y10B_A | D6B_A  | G1B_R  | T2B_A  | 2.9E-06 | 9.1E-06 | 5.830E-06 | 1.531E-06 |
| 8435 | S8B_A  | D6B_A  | V7B_A  | T4B_A  | 3.9E-06 | 7.1E-06 | 5.830E-06 | 8.670E-07 |
| 8436 | Y10B_A | L11B_A | S5B_A  | G1B_A  | 4.3E-06 | 8.5E-06 | 5.840E-06 | 1.243E-06 |
| 8437 | Y10B_A | D6B_A  | F19B_A | T2B_A  | 3.6E-06 | 9.7E-06 | 5.840E-06 | 1.411E-06 |
| 8438 | Y10B_A | D6B_A  | A16B_N | T4B_A  | 9.9E-07 | 1.1E-05 | 5.844E-06 | 2.766E-06 |
| 8439 | Y10B_A | F3B_A  | L11B_A | Q14B_A | 4.3E-06 | 1.0E-05 | 5.845E-06 | 1.391E-06 |
| 8440 | G13B_A | E18B_A | T4B_A  | T2B_A  | 3.5E-06 | 8.3E-06 | 5.845E-06 | 1.326E-06 |
| 8441 | G13B_A | E18B_A | S5B_A  | T4B_A  | 2.7E-06 | 7.4E-06 | 5.850E-06 | 1.248E-06 |
| 8442 | G13B_A | Y10B_A | F19B_A | T2B_A  | 3.5E-06 | 1.1E-05 | 5.850E-06 | 1.956E-06 |
| 8443 | Y10B_A | D6B_A  | L11B_A | T2B_A  | 3.5E-06 | 8.7E-06 | 5.850E-06 | 1.395E-06 |
| 8444 | G13B_A | A16B_N | E18B_A | K17B_A | 1.5E-06 | 9.2E-06 | 5.850E-06 | 2.109E-06 |
| 8445 | Y10B_A | D6B_A  | F19B_A | Q14B_A | 4.5E-06 | 7.4E-06 | 5.850E-06 | 9.151E-07 |
| 8446 | G13B_A | S8B_A  | F19B_A | Q14B_A | 4.1E-06 | 8.6E-06 | 5.855E-06 | 1.320E-06 |
| 8447 | G13B_A | S8B_A  | A16B_N | S5B_A  | 1.5E-06 | 1.0E-05 | 5.860E-06 | 2.036E-06 |
| 8448 | S8B_A  | G13B_W | K17B_A | T2B_A  | 3.7E-06 | 8.1E-06 | 5.860E-06 | 1.169E-06 |
| 8449 | G13B_A | L11B_A | T4B_A  | T2B_A  | 3.8E-06 | 9.1E-06 | 5.865E-06 | 1.480E-06 |
| 8450 | G13B_A | F3B_A  | A16B_N | K17B_A | 3.7E-06 | 1.2E-05 | 5.865E-06 | 2.235E-06 |
| 8451 | G13B_A | Y10B_A | A16B_N | Q14B_A | 1.1E-06 | 1.0E-05 | 5.865E-06 | 2.989E-06 |
| 8452 | Y10B_A | S8B_A  | D6B_A  | F19B_A | 2.7E-06 | 9.7E-06 | 5.875E-06 | 1.727E-06 |
| 8453 | Y10B_A | D6B_A  | E18B_A | S5B_A  | 3.6E-06 | 7.9E-06 | 5.880E-06 | 1.044E-06 |
| 8454 | G13B_A | Y10B_A | L11B_A | S5B_A  | 3.6E-06 | 1.2E-05 | 5.880E-06 | 1.685E-06 |
| 8455 | Y10B_A | S8B_A  | V7B_A  | E18B_A | 3.9E-06 | 9.1E-06 | 5.880E-06 | 1.235E-06 |
| 8456 | Y10B_A | S8B_A  | D6B_A  | G1B_A  | 3.9E-06 | 1.0E-05 | 5.880E-06 | 1.372E-06 |
| 8457 | G13B_A | Q14B_A | T2B_A  | G1B_A  | 3.6E-06 | 1.1E-05 | 5.885E-06 | 2.020E-06 |
| 8458 | Y10B_A | V7B_A  | A16B_N | S5B_A  | 1.5E-06 | 1.2E-05 | 5.895E-06 | 2.573E-06 |
| 8459 | G13B_A | Y10B_A | T4B_A  | F19B_A | 3.2E-06 | 1.2E-05 | 5.895E-06 | 2.065E-06 |
| 8460 | G13B_A | Y10B_A | D6B_A  | T4B_A  | 3.3E-06 | 8.7E-06 | 5.895E-06 | 1.502E-06 |
| 8461 | Y10B_A | V7B_A  | T2B_A  | G1B_A  | 4.3E-06 | 8.6E-06 | 5.905E-06 | 1.201E-06 |
| 8462 | Y10B_A | S8B_A  | A16B_N | F19B_A | 2.4E-06 | 1.2E-05 | 5.905E-06 | 2.591E-06 |
| 8463 | Y10B_A | V7B_A  | E18B_A | Q14B_A | 3.3E-06 | 7.1E-06 | 5.910E-06 | 9.273E-07 |
| 8464 | Y10B_A | V7B_A  | G1B_R  | T2B_A  | 4.2E-06 | 7.9E-06 | 5.915E-06 | 1.198E-06 |
| 8465 | G13B_A | D6B_A  | S5B_A  | Q14B_A | 3.3E-06 | 8.3E-06 | 5.915E-06 | 1.374E-06 |
| 8466 | S8B_A  | V7B_A  | A16B_N | Q14B_A | 2.2E-06 | 9.0E-06 | 5.915E-06 | 1.714E-06 |
| 8467 | G13B_A | A16B_N | T4B_A  | Q14B_A | 2.2E-06 | 1.1E-05 | 5.915E-06 | 2.351E-06 |
| 8468 | G13B_A | V7B_A  | S5B_A  | Q14B_A | 3.4E-06 | 9.9E-06 | 5.920E-06 | 1.607E-06 |
| 8469 | Y10B_A | S8B_A  | V7B_A  | L11B_A | 4.1E-06 | 1.1E-05 | 5.920E-06 | 1.482E-06 |
| 8470 | Y10B_A | S8B_A  | F3B_A  | F19B_A | 3.1E-06 | 1.0E-05 | 5.920E-06 | 1.403E-06 |
| 8471 | Y10B_A | D6B_A  | V7B_A  | S5B_A  | 3.9E-06 | 7.4E-06 | 5.925E-06 | 9.503E-07 |
| 8472 | Y10B_A | S8B_A  | D6B_A  | F3B_A  | 3.9E-06 | 8.7E-06 | 5.925E-06 | 1.376E-06 |
| 8473 | Y10B_A | D6B_A  | A16B_N | S5B_A  | 9.9E-07 | 1.1E-05 | 5.929E-06 | 2.726E-06 |
| 8474 | G13B_A | S8B_A  | L11B_A | T2B_A  | 3.6E-06 | 8.1E-06 | 5.930E-06 | 1.167E-06 |
| 8475 | Y10B_A | F3B_A  | A16B_N | S5B_A  | 1.7E-06 | 1.0E-05 | 5.935E-06 | 1.670E-06 |

|      |        |        |        |        |         |         |           |           |
|------|--------|--------|--------|--------|---------|---------|-----------|-----------|
| 8476 | G13B_A | L11B_A | E18B_A | K17B_A | 3.6E-06 | 8.7E-06 | 5.945E-06 | 1.553E-06 |
| 8477 | Y10B_A | A16B_N | G1B_R  | T4B_A  | 1.2E-06 | 8.4E-06 | 5.945E-06 | 1.770E-06 |
| 8478 | Y10B_A | A16B_N | T2B_A  | G1B_A  | 1.0E-06 | 1.2E-05 | 5.960E-06 | 2.700E-06 |
| 8479 | G13B_A | E18B_A | K17B_A | G1B_A  | 2.8E-06 | 1.1E-05 | 5.965E-06 | 1.960E-06 |
| 8480 | G13B_A | A16B_N | S5B_A  | T2B_A  | 1.4E-06 | 1.2E-05 | 5.965E-06 | 2.497E-06 |
| 8481 | S8B_A  | D6B_A  | E18B_A | S5B_A  | 4.0E-06 | 9.3E-06 | 5.965E-06 | 1.254E-06 |
| 8482 | Y10B_A | E18B_T | S5B_A  | K17B_A | 2.9E-06 | 9.7E-06 | 5.970E-06 | 1.959E-06 |
| 8483 | Y10B_A | F3B_A  | E18B_A | S5B_A  | 3.5E-06 | 8.3E-06 | 5.975E-06 | 1.096E-06 |
| 8484 | Y10B_A | S8B_A  | D6B_A  | V7B_A  | 2.4E-06 | 9.1E-06 | 5.985E-06 | 1.640E-06 |
| 8485 | G13B_A | V7B_A  | T4B_A  | Q14B_A | 4.1E-06 | 9.4E-06 | 5.990E-06 | 1.384E-06 |
| 8486 | Y10B_A | S8B_A  | E18B_A | G1B_A  | 4.0E-06 | 8.7E-06 | 5.990E-06 | 1.209E-06 |
| 8487 | Y10B_A | S8B_A  | E18B_T | K17B_A | 4.0E-06 | 9.6E-06 | 5.995E-06 | 1.515E-06 |
| 8488 | Y10B_A | V7B_A  | E18B_A | S5B_A  | 4.4E-06 | 1.1E-05 | 5.995E-06 | 1.479E-06 |
| 8489 | G13B_A | S8B_A  | E18B_A | S5B_A  | 4.6E-06 | 8.7E-06 | 5.995E-06 | 1.176E-06 |
| 8490 | Y10B_A | D6B_A  | V7B_A  | T4B_A  | 3.7E-06 | 7.8E-06 | 6.000E-06 | 1.169E-06 |
| 8491 | Y10B_A | E18B_A | S5B_A  | G1B_A  | 4.6E-06 | 7.4E-06 | 6.005E-06 | 9.865E-07 |
| 8492 | S8B_A  | D6B_A  | A16B_N | Q14B_A | 2.1E-06 | 1.3E-05 | 6.010E-06 | 2.666E-06 |
| 8493 | Y10B_A | D6B_A  | L11B_A | Q14B_A | 4.6E-06 | 1.1E-05 | 6.015E-06 | 1.698E-06 |
| 8494 | Y10B_A | A16B_N | G1B_R  | K17B_A | 1.6E-06 | 1.1E-05 | 6.015E-06 | 2.492E-06 |
| 8495 | Y10B_A | V7B_A  | F19B_A | T2B_A  | 3.6E-06 | 1.2E-05 | 6.020E-06 | 2.005E-06 |
| 8496 | Y10B_A | D6B_A  | A16B_N | Q14B_A | 1.6E-06 | 1.1E-05 | 6.025E-06 | 2.756E-06 |
| 8497 | G13B_A | Y10B_A | D6B_A  | S5B_A  | 3.6E-06 | 8.3E-06 | 6.030E-06 | 1.515E-06 |
| 8498 | Y10B_A | D6B_A  | V7B_A  | Q14B_A | 3.9E-06 | 8.3E-06 | 6.030E-06 | 1.219E-06 |
| 8499 | Y10B_A | S8B_A  | G13B_W | K17B_A | 4.2E-06 | 8.1E-06 | 6.035E-06 | 1.067E-06 |
| 8500 | Y10B_A | F3B_A  | K17B_A | F19B_W | 2.6E-06 | 1.1E-05 | 6.035E-06 | 2.125E-06 |
| 8501 | Y10B_A | L11B_A | T4B_A  | F19B_A | 3.3E-06 | 9.5E-06 | 6.040E-06 | 1.972E-06 |
| 8502 | G13B_A | A16B_N | Q14B_A | T2B_A  | 2.3E-06 | 9.0E-06 | 6.040E-06 | 1.544E-06 |
| 8503 | Y10B_A | D6B_A  | E18B_A | T2B_A  | 4.9E-06 | 7.6E-06 | 6.040E-06 | 7.970E-07 |
| 8504 | Y10B_A | D6B_A  | L11B_A | T4B_A  | 4.4E-06 | 8.6E-06 | 6.045E-06 | 1.077E-06 |
| 8505 | G13B_A | A16B_N | T4B_A  | T2B_A  | 1.4E-06 | 1.2E-05 | 6.050E-06 | 2.758E-06 |
| 8506 | G13B_A | Y10B_A | S8B_A  | F3B_A  | 3.4E-06 | 8.1E-06 | 6.055E-06 | 1.394E-06 |
| 8507 | S8B_A  | D6B_A  | F3B_A  | T2B_A  | 3.7E-06 | 9.1E-06 | 6.060E-06 | 1.341E-06 |
| 8508 | S8B_A  | D6B_A  | L11B_A | S5B_A  | 3.3E-06 | 8.7E-06 | 6.065E-06 | 1.470E-06 |
| 8509 | S8B_A  | D6B_A  | T4B_A  | F19B_A | 4.5E-06 | 1.1E-05 | 6.070E-06 | 1.700E-06 |
| 8510 | Y10B_A | G13B_W | S5B_A  | K17B_A | 3.3E-06 | 9.5E-06 | 6.075E-06 | 1.493E-06 |
| 8511 | Y10B_A | D6B_A  | F3B_A  | Q14B_A | 3.4E-06 | 9.1E-06 | 6.080E-06 | 1.570E-06 |
| 8512 | Y10B_A | S8B_A  | V7B_A  | A16B_N | 8.8E-07 | 1.1E-05 | 6.084E-06 | 2.744E-06 |
| 8513 | G13B_A | E18B_A | S5B_A  | T2B_A  | 3.9E-06 | 1.0E-05 | 6.085E-06 | 1.786E-06 |
| 8514 | Y10B_A | A16B_N | S5B_A  | F19B_A | 2.0E-06 | 1.1E-05 | 6.090E-06 | 2.187E-06 |
| 8515 | Y10B_A | F3B_A  | A16B_N | T4B_A  | 2.4E-06 | 1.1E-05 | 6.090E-06 | 2.138E-06 |
| 8516 | G13B_A | S8B_A  | A16B_N | T2B_A  | 1.8E-06 | 1.1E-05 | 6.110E-06 | 2.303E-06 |
| 8517 | G13B_A | Y10B_A | T4B_A  | G1B_A  | 4.2E-06 | 8.4E-06 | 6.110E-06 | 1.094E-06 |
| 8518 | Y10B_A | A16B_N | E18B_A | S5B_A  | 9.9E-07 | 1.0E-05 | 6.114E-06 | 2.742E-06 |
| 8519 | G13B_A | Y10B_A | S8B_A  | F19B_A | 3.6E-06 | 1.1E-05 | 6.115E-06 | 1.912E-06 |
| 8520 | G13B_A | S8B_A  | F3B_A  | S5B_A  | 4.3E-06 | 9.5E-06 | 6.115E-06 | 1.502E-06 |
| 8521 | G13B_A | S5B_A  | T4B_A  | F19B_A | 4.1E-06 | 1.1E-05 | 6.115E-06 | 1.719E-06 |
| 8522 | S8B_A  | D6B_A  | L11B_A | Q14B_A | 4.6E-06 | 9.6E-06 | 6.115E-06 | 1.127E-06 |
| 8523 | G13B_A | Y10B_A | G1B_R  | K17B_A | 3.7E-06 | 1.2E-05 | 6.130E-06 | 1.797E-06 |
| 8524 | Y10B_A | G1B_R  | S5B_A  | T2B_A  | 4.4E-06 | 8.5E-06 | 6.135E-06 | 1.121E-06 |
| 8525 | Y10B_A | F3B_A  | E18B_A | Q14B_A | 3.9E-06 | 1.0E-05 | 6.135E-06 | 1.547E-06 |
| 8526 | G13B_A | G1B_R  | K17B_A | Q14B_A | 3.8E-06 | 8.4E-06 | 6.140E-06 | 1.270E-06 |
| 8527 | G13B_A | S5B_A  | T4B_A  | G1B_A  | 3.6E-06 | 1.1E-05 | 6.140E-06 | 1.600E-06 |

|      |        |        |        |        |         |         |           |           |
|------|--------|--------|--------|--------|---------|---------|-----------|-----------|
| 8528 | Y10B_A | L11B_A | E18B_A | T4B_A  | 3.9E-06 | 9.7E-06 | 6.145E-06 | 1.359E-06 |
| 8529 | Y10B_A | S8B_A  | L11B_A | F19B_A | 3.6E-06 | 1.1E-05 | 6.155E-06 | 1.677E-06 |
| 8530 | Y10B_A | S8B_A  | A16B_N | E18B_A | 1.6E-06 | 1.6E-05 | 6.155E-06 | 3.673E-06 |
| 8531 | G13B_A | D6B_A  | E18B_A | K17B_A | 4.5E-06 | 9.4E-06 | 6.155E-06 | 1.224E-06 |
| 8532 | S8B_A  | V7B_A  | A16B_N | S5B_A  | 1.4E-06 | 1.4E-05 | 6.155E-06 | 3.277E-06 |
| 8533 | G13B_A | T4B_A  | Q14B_A | G1B_A  | 3.8E-06 | 9.1E-06 | 6.160E-06 | 1.351E-06 |
| 8534 | Y10B_A | S8B_A  | L11B_A | E18B_A | 3.9E-06 | 8.3E-06 | 6.165E-06 | 1.115E-06 |
| 8535 | Y10B_A | V7B_A  | E18B_A | T4B_A  | 3.9E-06 | 1.2E-05 | 6.170E-06 | 1.927E-06 |
| 8536 | S8B_A  | D6B_A  | T2B_A  | G1B_A  | 3.5E-06 | 8.3E-06 | 6.185E-06 | 1.174E-06 |
| 8537 | Y10B_A | D6B_A  | A16B_N | T2B_A  | 1.5E-06 | 9.7E-06 | 6.195E-06 | 2.126E-06 |
| 8538 | G13B_A | L11B_A | Q14B_A | T2B_A  | 4.3E-06 | 9.5E-06 | 6.195E-06 | 1.392E-06 |
| 8539 | G13B_A | E18B_A | T4B_A  | Q14B_A | 3.9E-06 | 1.0E-05 | 6.200E-06 | 1.518E-06 |
| 8540 | Y10B_A | L11B_A | E18B_A | T2B_A  | 4.3E-06 | 8.7E-06 | 6.200E-06 | 1.388E-06 |
| 8541 | S8B_A  | D6B_A  | F19B_A | T2B_A  | 3.3E-06 | 1.0E-05 | 6.210E-06 | 1.642E-06 |
| 8542 | Y10B_A | K17B_A | S9B_A  | T2B_A  | 4.2E-06 | 8.8E-06 | 6.215E-06 | 1.152E-06 |
| 8543 | G13B_A | D6B_A  | T4B_A  | Q14B_A | 3.9E-06 | 9.2E-06 | 6.220E-06 | 1.397E-06 |
| 8544 | Y10B_A | D6B_A  | F3B_A  | S5B_A  | 3.9E-06 | 8.7E-06 | 6.240E-06 | 1.152E-06 |
| 8545 | G13B_A | G1B_R  | K17B_A | T4B_A  | 4.1E-06 | 8.0E-06 | 6.250E-06 | 1.028E-06 |
| 8546 | S8B_A  | D6B_A  | S5B_A  | F19B_A | 3.3E-06 | 1.0E-05 | 6.255E-06 | 1.707E-06 |
| 8547 | G13B_A | Y10B_A | A16B_N | T4B_A  | 2.4E-06 | 1.1E-05 | 6.255E-06 | 2.387E-06 |
| 8548 | S8B_A  | D6B_A  | V7B_A  | Q14B_A | 4.1E-06 | 1.5E-05 | 6.255E-06 | 2.452E-06 |
| 8549 | G13B_A | S8B_A  | E18B_A | T2B_A  | 3.3E-06 | 8.7E-06 | 6.255E-06 | 1.410E-06 |
| 8550 | G13B_A | F19B_A | Q14B_A | T2B_A  | 4.8E-06 | 1.2E-05 | 6.255E-06 | 1.824E-06 |
| 8551 | Y10B_A | F3B_A  | E18B_A | T4B_A  | 3.9E-06 | 9.7E-06 | 6.260E-06 | 1.793E-06 |
| 8552 | G13B_A | Y10B_A | S5B_A  | F19B_A | 4.1E-06 | 9.5E-06 | 6.260E-06 | 1.479E-06 |
| 8553 | Y10B_A | L11B_A | E18B_A | S5B_A  | 4.6E-06 | 9.7E-06 | 6.265E-06 | 1.289E-06 |
| 8554 | Y10B_A | S8B_A  | K17B_A | F19B_W | 3.7E-06 | 1.1E-05 | 6.270E-06 | 1.929E-06 |
| 8555 | G13B_A | S8B_A  | D6B_A  | Q14B_A | 4.6E-06 | 9.1E-06 | 6.270E-06 | 1.227E-06 |
| 8556 | Y10B_A | L11B_A | G1B_R  | K17B_A | 4.6E-06 | 8.1E-06 | 6.275E-06 | 1.054E-06 |
| 8557 | Y10B_A | G1B_R  | K17B_A | F19B_A | 4.3E-06 | 9.4E-06 | 6.275E-06 | 1.500E-06 |
| 8558 | S8B_A  | G13B_W | K17B_A | T4B_A  | 4.7E-06 | 9.0E-06 | 6.280E-06 | 1.252E-06 |
| 8559 | G13B_A | Y10B_A | E18B_A | S5B_A  | 4.6E-06 | 1.1E-05 | 6.285E-06 | 1.724E-06 |
| 8560 | Y10B_A | L11B_A | E18B_A | Q14B_A | 3.9E-06 | 8.7E-06 | 6.285E-06 | 1.286E-06 |
| 8561 | Y10B_A | V7B_A  | A16B_N | K17B_A | 2.2E-06 | 1.0E-05 | 6.285E-06 | 2.242E-06 |
| 8562 | G13B_A | K17B_A | F19B_A | T2B_A  | 5.0E-06 | 8.3E-06 | 6.300E-06 | 8.392E-07 |
| 8563 | Y10B_A | A16B_N | E18B_A | T4B_A  | 1.3E-06 | 1.4E-05 | 6.300E-06 | 2.988E-06 |
| 8564 | Y10B_A | V7B_A  | F3B_A  | T4B_A  | 2.5E-06 | 8.1E-06 | 6.300E-06 | 1.593E-06 |
| 8565 | S8B_A  | D6B_A  | L11B_A | T4B_A  | 3.5E-06 | 9.7E-06 | 6.305E-06 | 1.590E-06 |
| 8566 | G13B_A | S8B_A  | D6B_A  | S5B_A  | 4.6E-06 | 1.1E-05 | 6.310E-06 | 1.535E-06 |
| 8567 | G13B_A | S8B_A  | A16B_N | K17B_A | 2.2E-06 | 1.3E-05 | 6.310E-06 | 3.071E-06 |
| 8568 | S8B_A  | D6B_A  | S5B_A  | G1B_A  | 3.9E-06 | 8.6E-06 | 6.315E-06 | 1.009E-06 |
| 8569 | Y10B_A | S8B_A  | E18B_A | F19B_A | 3.5E-06 | 1.0E-05 | 6.315E-06 | 1.611E-06 |
| 8570 | G13B_A | Y10B_A | D6B_A  | Q14B_A | 4.6E-06 | 1.1E-05 | 6.315E-06 | 1.428E-06 |
| 8571 | Y10B_A | L11B_A | K17B_A | G1B_A  | 3.5E-06 | 7.7E-06 | 6.320E-06 | 1.034E-06 |
| 8572 | G13B_A | S8B_A  | D6B_A  | T2B_A  | 4.4E-06 | 8.7E-06 | 6.320E-06 | 1.242E-06 |
| 8573 | Y10B_A | E18B_T | K17B_A | T4B_A  | 3.6E-06 | 9.7E-06 | 6.325E-06 | 1.775E-06 |
| 8574 | Y10B_A | V7B_A  | G1B_R  | K17B_A | 3.8E-06 | 9.4E-06 | 6.325E-06 | 1.533E-06 |
| 8575 | Y10B_A | F3B_A  | E18B_A | T2B_A  | 3.0E-06 | 1.1E-05 | 6.325E-06 | 1.621E-06 |
| 8576 | G13B_A | S8B_A  | V7B_A  | K17B_A | 3.5E-06 | 9.0E-06 | 6.335E-06 | 1.386E-06 |
| 8577 | Y10B_A | G13B_W | K17B_A | T4B_A  | 4.0E-06 | 1.1E-05 | 6.350E-06 | 1.990E-06 |
| 8578 | Y10B_A | A16B_N | E18B_A | T2B_A  | 1.7E-06 | 1.0E-05 | 6.350E-06 | 2.636E-06 |
| 8579 | S8B_A  | D6B_A  | A16B_N | T4B_A  | 2.0E-06 | 8.3E-06 | 6.375E-06 | 1.837E-06 |

|      |        |        |        |        |         |         |           |           |
|------|--------|--------|--------|--------|---------|---------|-----------|-----------|
| 8580 | Y10B_A | K17B_A | F19B_W | T2B_A  | 3.3E-06 | 1.5E-05 | 6.380E-06 | 2.624E-06 |
| 8581 | Y10B_A | A16B_N | Q14B_A | G1B_A  | 1.7E-06 | 1.1E-05 | 6.380E-06 | 2.296E-06 |
| 8582 | Y10B_A | S8B_A  | F3B_A  | E18B_A | 4.6E-06 | 9.7E-06 | 6.385E-06 | 1.259E-06 |
| 8583 | S8B_A  | D6B_A  | E18B_A | T4B_A  | 4.2E-06 | 1.1E-05 | 6.390E-06 | 1.535E-06 |
| 8584 | G13B_A | S8B_A  | A16B_N | Q14B_A | 1.8E-06 | 1.1E-05 | 6.395E-06 | 2.273E-06 |
| 8585 | Y10B_A | F3B_A  | A16B_N | K17B_A | 1.7E-06 | 1.2E-05 | 6.395E-06 | 3.323E-06 |
| 8586 | Y10B_A | K17B_A | S9B_A  | Q14B_A | 4.6E-06 | 1.0E-05 | 6.400E-06 | 1.450E-06 |
| 8587 | Y10B_A | V7B_A  | L11B_A | T2B_A  | 4.3E-06 | 1.1E-05 | 6.405E-06 | 1.724E-06 |
| 8588 | Y10B_A | D6B_A  | Q14B_A | G1B_A  | 3.5E-06 | 1.1E-05 | 6.405E-06 | 1.724E-06 |
| 8589 | G13B_A | Y10B_A | K17B_A | F19B_A | 3.5E-06 | 1.0E-05 | 6.415E-06 | 1.617E-06 |
| 8590 | Y10B_A | G1B_R  | T4B_A  | Q14B_A | 4.4E-06 | 9.0E-06 | 6.435E-06 | 1.308E-06 |
| 8591 | G13B_A | Y10B_A | S8B_A  | E18B_A | 4.6E-06 | 1.4E-05 | 6.445E-06 | 2.175E-06 |
| 8592 | Y10B_A | E18B_A | F19B_A | Q14B_A | 4.6E-06 | 1.0E-05 | 6.455E-06 | 1.587E-06 |
| 8593 | G13B_A | G1B_R  | K17B_A | T2B_A  | 4.4E-06 | 9.4E-06 | 6.460E-06 | 1.362E-06 |
| 8594 | Y10B_A | E18B_A | S5B_A  | F19B_A | 3.9E-06 | 1.1E-05 | 6.475E-06 | 1.740E-06 |
| 8595 | Y10B_A | K17B_A | T4B_A  | E12B_A | 4.5E-06 | 1.0E-05 | 6.475E-06 | 1.559E-06 |
| 8596 | Y10B_A | D6B_A  | L11B_A | S5B_A  | 4.6E-06 | 9.1E-06 | 6.485E-06 | 1.413E-06 |
| 8597 | Y10B_A | F3B_A  | G1B_R  | K17B_A | 4.2E-06 | 8.4E-06 | 6.490E-06 | 1.103E-06 |
| 8598 | G13B_A | D6B_A  | K17B_A | G1B_A  | 3.9E-06 | 1.2E-05 | 6.490E-06 | 1.808E-06 |
| 8599 | G13B_A | Y10B_A | A16B_N | K17B_A | 2.2E-06 | 9.6E-06 | 6.495E-06 | 2.029E-06 |
| 8600 | G13B_A | S8B_A  | E18B_A | Q14B_A | 4.5E-06 | 8.7E-06 | 6.500E-06 | 1.442E-06 |
| 8601 | G13B_A | L11B_A | K17B_A | T4B_A  | 4.2E-06 | 8.6E-06 | 6.500E-06 | 1.319E-06 |
| 8602 | Y10B_A | E18B_A | Q14B_A | G1B_A  | 4.6E-06 | 8.7E-06 | 6.505E-06 | 1.181E-06 |
| 8603 | G13B_A | Y10B_A | E18B_A | Q14B_A | 4.4E-06 | 9.7E-06 | 6.515E-06 | 1.198E-06 |
| 8604 | Y10B_A | K17B_A | T4B_A  | S9B_A  | 4.2E-06 | 9.2E-06 | 6.515E-06 | 1.409E-06 |
| 8605 | G13B_A | G1B_R  | S5B_A  | K17B_A | 4.1E-06 | 1.1E-05 | 6.525E-06 | 1.605E-06 |
| 8606 | Y10B_A | D6B_A  | S5B_A  | G1B_A  | 3.7E-06 | 1.0E-05 | 6.525E-06 | 1.885E-06 |
| 8607 | Y10B_A | K17B_A | Q14B_A | E12B_A | 4.5E-06 | 8.5E-06 | 6.535E-06 | 1.285E-06 |
| 8608 | Y10B_A | S8B_A  | D6B_A  | L11B_A | 3.9E-06 | 9.2E-06 | 6.535E-06 | 1.442E-06 |
| 8609 | Y10B_A | D6B_A  | E18B_A | Q14B_A | 4.9E-06 | 8.0E-06 | 6.550E-06 | 8.237E-07 |
| 8610 | Y10B_A | E18B_A | T2B_A  | G1B_A  | 5.1E-06 | 7.8E-06 | 6.555E-06 | 8.319E-07 |
| 8611 | Y10B_A | A16B_N | T4B_A  | F19B_A | 2.2E-06 | 1.0E-05 | 6.555E-06 | 2.271E-06 |
| 8612 | G13B_A | A16B_N | S5B_A  | K17B_A | 1.9E-06 | 1.2E-05 | 6.560E-06 | 2.810E-06 |
| 8613 | G13B_A | S8B_A  | K17B_A | G1B_A  | 4.8E-06 | 9.0E-06 | 6.570E-06 | 1.094E-06 |
| 8614 | Y10B_A | F3B_A  | T4B_A  | T2B_A  | 3.9E-06 | 1.1E-05 | 6.585E-06 | 1.735E-06 |
| 8615 | Y10B_A | K17B_A | T2B_A  | E12B_A | 4.5E-06 | 9.5E-06 | 6.595E-06 | 1.282E-06 |
| 8616 | G13B_A | A16B_N | K17B_A | T4B_A  | 1.7E-06 | 1.2E-05 | 6.605E-06 | 2.741E-06 |
| 8617 | S8B_A  | D6B_A  | F3B_A  | T4B_A  | 3.1E-06 | 1.0E-05 | 6.630E-06 | 1.830E-06 |
| 8618 | G13B_A | K17B_A | T2B_A  | G1B_A  | 4.8E-06 | 1.1E-05 | 6.640E-06 | 1.454E-06 |
| 8619 | G13B_A | Y10B_A | K17B_A | G1B_A  | 4.8E-06 | 9.0E-06 | 6.655E-06 | 1.106E-06 |
| 8620 | G13B_A | K17B_A | T4B_A  | F19B_A | 4.3E-06 | 9.7E-06 | 6.665E-06 | 1.594E-06 |
| 8621 | Y10B_A | D6B_A  | E18B_A | T4B_A  | 3.7E-06 | 1.0E-05 | 6.665E-06 | 1.633E-06 |
| 8622 | S8B_A  | D6B_A  | L11B_A | T2B_A  | 3.5E-06 | 1.1E-05 | 6.670E-06 | 2.008E-06 |
| 8623 | Y10B_A | A16B_N | G1B_R  | S5B_A  | 1.6E-06 | 1.3E-05 | 6.675E-06 | 2.579E-06 |
| 8624 | G13B_A | V7B_A  | K17B_A | T2B_A  | 4.1E-06 | 1.0E-05 | 6.675E-06 | 1.183E-06 |
| 8625 | S8B_A  | D6B_A  | A16B_N | S5B_A  | 1.4E-06 | 1.1E-05 | 6.685E-06 | 2.547E-06 |
| 8626 | G13B_A | S8B_A  | G1B_R  | K17B_A | 3.8E-06 | 1.2E-05 | 6.685E-06 | 1.819E-06 |
| 8627 | Y10B_A | D6B_A  | T4B_A  | F19B_A | 4.4E-06 | 1.2E-05 | 6.685E-06 | 2.133E-06 |
| 8628 | G13B_A | D6B_A  | S5B_A  | T2B_A  | 4.5E-06 | 1.4E-05 | 6.700E-06 | 2.241E-06 |
| 8629 | Y10B_A | D6B_A  | T4B_A  | G1B_A  | 3.9E-06 | 1.1E-05 | 6.705E-06 | 1.796E-06 |
| 8630 | Y10B_A | E18B_A | G1B_R  | K17B_A | 5.4E-06 | 9.0E-06 | 6.705E-06 | 9.907E-07 |
| 8631 | Y10B_A | D6B_A  | G1B_R  | K17B_A | 4.8E-06 | 1.1E-05 | 6.705E-06 | 2.040E-06 |

|      |        |        |        |        |         |         |           |           |
|------|--------|--------|--------|--------|---------|---------|-----------|-----------|
| 8632 | S8B_A  | D6B_A  | A16B_N | T2B_A  | 1.9E-06 | 1.3E-05 | 6.715E-06 | 2.527E-06 |
| 8633 | Y10B_A | V7B_A  | K17B_A | F19B_A | 4.6E-06 | 1.1E-05 | 6.730E-06 | 1.639E-06 |
| 8634 | S8B_A  | G13B_W | S5B_A  | K17B_A | 4.6E-06 | 1.0E-05 | 6.735E-06 | 1.650E-06 |
| 8635 | Y10B_A | E18B_T | K17B_A | Q14B_A | 4.7E-06 | 9.7E-06 | 6.745E-06 | 1.791E-06 |
| 8636 | S8B_A  | D6B_A  | E18B_A | Q14B_A | 4.2E-06 | 9.8E-06 | 6.750E-06 | 1.480E-06 |
| 8637 | Y10B_A | K17B_A | F19B_W | Q14B_A | 4.0E-06 | 1.1E-05 | 6.750E-06 | 1.794E-06 |
| 8638 | Y10B_A | L11B_A | T4B_A  | T2B_A  | 4.3E-06 | 1.0E-05 | 6.755E-06 | 1.524E-06 |
| 8639 | G13B_A | S8B_A  | S5B_A  | T4B_A  | 4.6E-06 | 9.5E-06 | 6.775E-06 | 1.574E-06 |
| 8640 | Y10B_A | S8B_A  | D6B_A  | E18B_A | 4.9E-06 | 1.0E-05 | 6.800E-06 | 1.351E-06 |
| 8641 | G13B_A | F3B_A  | S5B_A  | K17B_A | 4.8E-06 | 9.0E-06 | 6.815E-06 | 1.255E-06 |
| 8642 | Y10B_A | S5B_A  | K17B_A | F19B_W | 3.3E-06 | 1.2E-05 | 6.815E-06 | 2.006E-06 |
| 8643 | Y10B_A | D6B_A  | L11B_A | K17B_A | 4.2E-06 | 9.7E-06 | 6.830E-06 | 1.668E-06 |
| 8644 | S8B_A  | V7B_A  | F3B_A  | K17B_A | 3.6E-06 | 9.0E-06 | 6.835E-06 | 1.397E-06 |
| 8645 | G13B_A | L11B_A | K17B_A | T2B_A  | 5.6E-06 | 9.0E-06 | 6.840E-06 | 1.087E-06 |
| 8646 | Y10B_A | V7B_A  | F3B_A  | K17B_A | 3.9E-06 | 1.2E-05 | 6.850E-06 | 1.639E-06 |
| 8647 | Y10B_A | V7B_A  | K17B_A | G1B_A  | 4.5E-06 | 1.1E-05 | 6.860E-06 | 1.580E-06 |
| 8648 | G13B_A | D6B_A  | K17B_A | Q14B_A | 4.4E-06 | 9.3E-06 | 6.860E-06 | 1.032E-06 |
| 8649 | G13B_A | Y10B_A | S5B_A  | T4B_A  | 2.8E-06 | 9.1E-06 | 6.870E-06 | 1.580E-06 |
| 8650 | S8B_A  | D6B_A  | G1B_R  | K17B_A | 3.6E-06 | 1.0E-05 | 6.870E-06 | 1.697E-06 |
| 8651 | G13B_A | V7B_A  | K17B_A | T4B_A  | 5.6E-06 | 9.0E-06 | 6.880E-06 | 9.180E-07 |
| 8652 | Y10B_A | A16B_N | S5B_A  | T2B_A  | 2.3E-06 | 1.3E-05 | 6.885E-06 | 3.285E-06 |
| 8653 | Y10B_A | S8B_A  | G1B_R  | Q14B_A | 4.7E-06 | 9.9E-06 | 6.895E-06 | 1.633E-06 |
| 8654 | Y10B_A | F3B_A  | L11B_A | K17B_A | 3.9E-06 | 9.4E-06 | 6.900E-06 | 1.422E-06 |
| 8655 | Y10B_A | T4B_A  | F19B_A | Q14B_A | 4.3E-06 | 1.1E-05 | 6.915E-06 | 1.698E-06 |
| 8656 | G13B_A | S8B_A  | L11B_A | K17B_A | 4.8E-06 | 1.2E-05 | 6.915E-06 | 1.786E-06 |
| 8657 | Y10B_A | G13B_W | K17B_A | Q14B_A | 4.6E-06 | 1.1E-05 | 6.915E-06 | 2.252E-06 |
| 8658 | Y10B_A | G1B_R  | S5B_A  | T4B_A  | 4.0E-06 | 9.9E-06 | 6.920E-06 | 1.418E-06 |
| 8659 | G13B_A | S8B_A  | D6B_A  | T4B_A  | 2.7E-06 | 1.3E-05 | 6.925E-06 | 2.135E-06 |
| 8660 | G13B_A | Y10B_A | F3B_A  | K17B_A | 4.8E-06 | 1.0E-05 | 6.925E-06 | 1.497E-06 |
| 8661 | Y10B_A | F3B_A  | E18B_A | K17B_A | 4.6E-06 | 9.7E-06 | 6.930E-06 | 1.366E-06 |
| 8662 | Y10B_A | S8B_A  | F19B_A | Q14B_A | 5.1E-06 | 9.5E-06 | 6.935E-06 | 1.288E-06 |
| 8663 | S8B_A  | D6B_A  | E18B_A | T2B_A  | 4.9E-06 | 1.0E-05 | 6.940E-06 | 1.481E-06 |
| 8664 | Y10B_A | S8B_A  | A16B_N | T4B_A  | 1.2E-06 | 1.3E-05 | 6.945E-06 | 2.895E-06 |
| 8665 | Y10B_A | S8B_A  | V7B_A  | T2B_A  | 3.9E-06 | 1.2E-05 | 6.955E-06 | 2.002E-06 |
| 8666 | Y10B_A | E18B_T | K17B_A | T2B_A  | 3.5E-06 | 1.7E-05 | 6.955E-06 | 3.099E-06 |
| 8667 | Y10B_A | V7B_A  | A16B_N | T4B_A  | 2.2E-06 | 1.1E-05 | 6.955E-06 | 1.926E-06 |
| 8668 | G13B_A | Y10B_A | L11B_A | K17B_A | 5.0E-06 | 9.0E-06 | 6.955E-06 | 1.232E-06 |
| 8669 | Y10B_A | V7B_A  | Q14B_A | T2B_A  | 4.5E-06 | 9.5E-06 | 6.970E-06 | 1.451E-06 |
| 8670 | Y10B_A | L11B_A | Q14B_A | T2B_A  | 4.8E-06 | 9.1E-06 | 6.975E-06 | 1.196E-06 |
| 8671 | G13B_A | S8B_A  | F3B_A  | K17B_A | 5.6E-06 | 8.6E-06 | 6.980E-06 | 8.339E-07 |
| 8672 | Y10B_A | A16B_N | K17B_A | T2B_A  | 1.8E-06 | 1.3E-05 | 6.990E-06 | 4.237E-06 |
| 8673 | Y10B_A | K17B_A | F19B_A | G1B_A  | 4.4E-06 | 1.4E-05 | 6.990E-06 | 2.096E-06 |
| 8674 | G13B_A | L11B_A | K17B_A | Q14B_A | 5.4E-06 | 9.5E-06 | 6.995E-06 | 1.157E-06 |
| 8675 | G13B_A | E18B_A | K17B_A | Q14B_A | 5.4E-06 | 8.3E-06 | 7.000E-06 | 8.956E-07 |
| 8676 | Y10B_A | F3B_A  | S5B_A  | T2B_A  | 4.8E-06 | 9.1E-06 | 7.005E-06 | 1.271E-06 |
| 8677 | G13B_A | S8B_A  | K17B_A | F19B_A | 5.4E-06 | 9.7E-06 | 7.015E-06 | 1.276E-06 |
| 8678 | Y10B_A | L11B_A | K17B_A | F19B_A | 3.9E-06 | 1.2E-05 | 7.030E-06 | 1.718E-06 |
| 8679 | Y10B_A | G1B_R  | S5B_A  | Q14B_A | 4.4E-06 | 1.2E-05 | 7.030E-06 | 2.157E-06 |
| 8680 | Y10B_A | S8B_A  | T4B_A  | F19B_A | 4.3E-06 | 1.0E-05 | 7.035E-06 | 1.518E-06 |
| 8681 | Y10B_A | D6B_A  | K17B_A | F19B_A | 5.1E-06 | 9.3E-06 | 7.045E-06 | 1.252E-06 |
| 8682 | Y10B_A | D6B_A  | T2B_A  | G1B_A  | 4.6E-06 | 1.3E-05 | 7.065E-06 | 1.861E-06 |
| 8683 | Y10B_A | S8B_A  | G1B_R  | S5B_A  | 3.1E-06 | 1.1E-05 | 7.065E-06 | 1.905E-06 |



|      |        |        |        |        |         |         |           |           |
|------|--------|--------|--------|--------|---------|---------|-----------|-----------|
| 8684 | S8B_A  | D6B_A  | K17B_A | F19B_A | 4.4E-06 | 1.1E-05 | 7.070E-06 | 1.710E-06 |
| 8685 | G13B_A | Y10B_A | T4B_A  | T2B_A  | 4.8E-06 | 1.2E-05 | 7.075E-06 | 1.627E-06 |
| 8686 | G13B_A | K17B_A | T4B_A  | G1B_A  | 4.8E-06 | 1.2E-05 | 7.075E-06 | 1.682E-06 |
| 8687 | Y10B_A | A16B_N | L11B_A | K17B_A | 1.7E-06 | 1.5E-05 | 7.075E-06 | 3.569E-06 |
| 8688 | Y10B_A | S8B_A  | V7B_A  | T4B_A  | 3.9E-06 | 1.2E-05 | 7.080E-06 | 1.572E-06 |
| 8689 | Y10B_A | S8B_A  | K17B_A | E12B_A | 4.5E-06 | 1.1E-05 | 7.080E-06 | 1.516E-06 |
| 8690 | Y10B_A | V7B_A  | S5B_A  | T2B_A  | 4.1E-06 | 9.1E-06 | 7.115E-06 | 1.562E-06 |
| 8691 | S8B_A  | D6B_A  | K17B_A | G1B_A  | 5.1E-06 | 9.6E-06 | 7.125E-06 | 1.328E-06 |
| 8692 | G13B_A | Y10B_A | S8B_A  | T4B_A  | 3.3E-06 | 1.0E-05 | 7.125E-06 | 1.968E-06 |
| 8693 | G13B_A | F3B_A  | K17B_A | T4B_A  | 3.9E-06 | 1.0E-05 | 7.130E-06 | 1.670E-06 |
| 8694 | G13B_A | S5B_A  | T4B_A  | Q14B_A | 5.6E-06 | 1.0E-05 | 7.145E-06 | 1.238E-06 |
| 8695 | Y10B_A | A16B_N | E18B_A | K17B_A | 1.8E-06 | 1.3E-05 | 7.175E-06 | 3.094E-06 |
| 8696 | G13B_A | F3B_A  | K17B_A | T2B_A  | 4.6E-06 | 1.0E-05 | 7.180E-06 | 1.621E-06 |
| 8697 | S8B_A  | V7B_A  | A16B_N | K17B_A | 2.1E-06 | 1.3E-05 | 7.185E-06 | 2.493E-06 |
| 8698 | Y10B_A | G1B_R  | T4B_A  | T2B_A  | 4.3E-06 | 1.0E-05 | 7.185E-06 | 1.688E-06 |
| 8699 | G13B_A | F3B_A  | K17B_A | Q14B_A | 4.8E-06 | 1.2E-05 | 7.195E-06 | 1.756E-06 |
| 8700 | Y10B_A | F19B_A | T2B_A  | G1B_A  | 4.5E-06 | 1.3E-05 | 7.200E-06 | 2.266E-06 |
| 8701 | Y10B_A | S8B_A  | D6B_A  | S5B_A  | 5.1E-06 | 9.7E-06 | 7.200E-06 | 1.234E-06 |
| 8702 | Y10B_A | S8B_A  | F3B_A  | T4B_A  | 5.0E-06 | 1.0E-05 | 7.220E-06 | 1.346E-06 |
| 8703 | G13B_A | S8B_A  | S5B_A  | Q14B_A | 5.3E-06 | 9.5E-06 | 7.225E-06 | 1.391E-06 |
| 8704 | G13B_A | A16B_N | K17B_A | Q14B_A | 3.4E-06 | 1.5E-05 | 7.225E-06 | 2.503E-06 |
| 8705 | Y10B_A | D6B_A  | V7B_A  | K17B_A | 5.1E-06 | 1.1E-05 | 7.230E-06 | 1.480E-06 |
| 8706 | G13B_A | D6B_A  | K17B_A | T4B_A  | 4.2E-06 | 1.4E-05 | 7.240E-06 | 2.068E-06 |
| 8707 | G13B_A | S5B_A  | K17B_A | F19B_A | 4.1E-06 | 1.5E-05 | 7.250E-06 | 2.619E-06 |
| 8708 | Y10B_A | S8B_A  | G1B_R  | T4B_A  | 4.7E-06 | 1.4E-05 | 7.265E-06 | 2.269E-06 |
| 8709 | G13B_A | Y10B_A | S8B_A  | S5B_A  | 4.1E-06 | 1.1E-05 | 7.265E-06 | 1.722E-06 |
| 8710 | Y10B_A | A16B_N | K17B_A | T4B_A  | 1.9E-06 | 1.2E-05 | 7.270E-06 | 3.415E-06 |
| 8711 | Y10B_A | A16B_N | T4B_A  | T2B_A  | 2.0E-06 | 1.2E-05 | 7.270E-06 | 2.595E-06 |
| 8712 | Y10B_A | V7B_A  | L11B_A | K17B_A | 5.4E-06 | 9.1E-06 | 7.275E-06 | 1.176E-06 |
| 8713 | Y10B_A | S8B_A  | E18B_A | Q14B_A | 4.4E-06 | 8.7E-06 | 7.285E-06 | 1.165E-06 |
| 8714 | G13B_A | S5B_A  | K17B_A | G1B_A  | 3.9E-06 | 1.2E-05 | 7.290E-06 | 2.417E-06 |
| 8715 | Y10B_A | S8B_A  | G1B_R  | T2B_A  | 4.3E-06 | 1.0E-05 | 7.290E-06 | 1.448E-06 |
| 8716 | Y10B_A | T4B_A  | Q14B_A | G1B_A  | 4.8E-06 | 1.0E-05 | 7.295E-06 | 1.424E-06 |
| 8717 | Y10B_A | S8B_A  | L11B_A | Q14B_A | 2.9E-06 | 1.5E-05 | 7.295E-06 | 2.487E-06 |
| 8718 | Y10B_A | L11B_A | S5B_A  | T4B_A  | 4.3E-06 | 1.1E-05 | 7.300E-06 | 1.707E-06 |
| 8719 | G13B_A | E18B_A | K17B_A | T4B_A  | 3.9E-06 | 1.1E-05 | 7.320E-06 | 1.962E-06 |
| 8720 | G13B_A | Y10B_A | S5B_A  | T2B_A  | 3.7E-06 | 1.0E-05 | 7.320E-06 | 1.692E-06 |
| 8721 | Y10B_A | S5B_A  | K17B_A | E12B_A | 4.5E-06 | 1.2E-05 | 7.325E-06 | 1.823E-06 |
| 8722 | Y10B_A | E18B_A | T4B_A  | T2B_A  | 5.1E-06 | 1.1E-05 | 7.340E-06 | 1.576E-06 |
| 8723 | Y10B_A | F3B_A  | T4B_A  | Q14B_A | 4.1E-06 | 1.2E-05 | 7.370E-06 | 2.008E-06 |
| 8724 | G13B_A | K17B_A | F19B_A | Q14B_A | 3.9E-06 | 1.5E-05 | 7.370E-06 | 2.808E-06 |
| 8725 | Y10B_A | D6B_A  | F3B_A  | K17B_A | 4.8E-06 | 1.1E-05 | 7.375E-06 | 1.794E-06 |
| 8726 | Y10B_A | D6B_A  | S5B_A  | Q14B_A | 5.1E-06 | 1.1E-05 | 7.400E-06 | 1.333E-06 |
| 8727 | G13B_A | A16B_N | K17B_A | T2B_A  | 2.4E-06 | 1.2E-05 | 7.410E-06 | 3.137E-06 |
| 8728 | G13B_A | Y10B_A | Q14B_A | T2B_A  | 4.5E-06 | 1.1E-05 | 7.415E-06 | 1.805E-06 |
| 8729 | G13B_A | V7B_A  | K17B_A | Q14B_A | 4.8E-06 | 1.1E-05 | 7.425E-06 | 1.650E-06 |
| 8730 | Y10B_A | S5B_A  | F19B_A | Q14B_A | 4.8E-06 | 1.2E-05 | 7.425E-06 | 2.200E-06 |
| 8731 | Y10B_A | F3B_A  | Q14B_A | T2B_A  | 4.7E-06 | 1.3E-05 | 7.430E-06 | 1.915E-06 |
| 8732 | Y10B_A | S8B_A  | T4B_A  | G1B_A  | 5.3E-06 | 1.0E-05 | 7.430E-06 | 1.213E-06 |
| 8733 | Y10B_A | G1B_R  | Q14B_A | T2B_A  | 4.0E-06 | 1.1E-05 | 7.430E-06 | 1.857E-06 |
| 8734 | Y10B_A | E18B_A | K17B_A | G1B_A  | 4.2E-06 | 1.1E-05 | 7.440E-06 | 1.455E-06 |
| 8735 | Y10B_A | S8B_A  | F3B_A  | T2B_A  | 4.5E-06 | 1.0E-05 | 7.440E-06 | 1.419E-06 |

|      |        |        |        |        |         |         |           |           |
|------|--------|--------|--------|--------|---------|---------|-----------|-----------|
| 8736 | G13B_A | D6B_A  | S5B_A  | K17B_A | 5.1E-06 | 1.0E-05 | 7.445E-06 | 1.309E-06 |
| 8737 | S8B_A  | D6B_A  | A16B_N | K17B_A | 4.2E-06 | 1.6E-05 | 7.445E-06 | 2.979E-06 |
| 8738 | Y10B_A | A16B_N | K17B_A | G1B_A  | 2.4E-06 | 1.1E-05 | 7.455E-06 | 2.545E-06 |
| 8739 | Y10B_A | F3B_A  | K17B_A | G1B_A  | 5.6E-06 | 1.3E-05 | 7.460E-06 | 1.820E-06 |
| 8740 | Y10B_A | S8B_A  | F3B_A  | S5B_A  | 5.6E-06 | 1.0E-05 | 7.480E-06 | 1.406E-06 |
| 8741 | Y10B_A | S8B_A  | L11B_A | T4B_A  | 5.3E-06 | 1.1E-05 | 7.480E-06 | 1.694E-06 |
| 8742 | Y10B_A | S8B_A  | A16B_N | Q14B_A | 2.0E-06 | 1.3E-05 | 7.480E-06 | 2.997E-06 |
| 8743 | G13B_A | K17B_A | Q14B_A | G1B_A  | 4.8E-06 | 1.1E-05 | 7.485E-06 | 1.660E-06 |
| 8744 | Y10B_A | S8B_A  | F3B_A  | Q14B_A | 4.8E-06 | 1.3E-05 | 7.485E-06 | 2.301E-06 |
| 8745 | G13B_A | S8B_A  | Q14B_A | T2B_A  | 4.1E-06 | 1.3E-05 | 7.490E-06 | 2.035E-06 |
| 8746 | Y10B_A | F3B_A  | K17B_A | F19B_A | 5.0E-06 | 1.3E-05 | 7.505E-06 | 1.889E-06 |
| 8747 | Y10B_A | T4B_A  | F19B_A | T2B_A  | 4.3E-06 | 1.4E-05 | 7.505E-06 | 2.474E-06 |
| 8748 | Y10B_A | D6B_A  | T4B_A  | T2B_A  | 4.1E-06 | 1.5E-05 | 7.505E-06 | 2.266E-06 |
| 8749 | Y10B_A | A16B_N | E18B_A | Q14B_A | 4.9E-06 | 1.6E-05 | 7.505E-06 | 2.352E-06 |
| 8750 | S8B_A  | D6B_A  | Q14B_A | T2B_A  | 5.1E-06 | 1.1E-05 | 7.505E-06 | 1.417E-06 |
| 8751 | Y10B_A | S8B_A  | Q14B_A | G1B_A  | 4.7E-06 | 1.1E-05 | 7.510E-06 | 1.752E-06 |
| 8752 | G13B_A | V7B_A  | S5B_A  | K17B_A | 4.6E-06 | 1.1E-05 | 7.515E-06 | 1.806E-06 |
| 8753 | Y10B_A | S8B_A  | F19B_A | T2B_A  | 5.6E-06 | 1.0E-05 | 7.515E-06 | 1.124E-06 |
| 8754 | S8B_A  | D6B_A  | T4B_A  | Q14B_A | 5.1E-06 | 1.1E-05 | 7.530E-06 | 1.918E-06 |
| 8755 | Y10B_A | L11B_A | S5B_A  | T2B_A  | 3.9E-06 | 1.1E-05 | 7.535E-06 | 1.659E-06 |
| 8756 | G13B_A | Y10B_A | S8B_A  | Q14B_A | 4.8E-06 | 1.1E-05 | 7.535E-06 | 1.577E-06 |
| 8757 | Y10B_A | D6B_A  | K17B_A | G1B_A  | 5.1E-06 | 1.4E-05 | 7.555E-06 | 2.106E-06 |
| 8758 | Y10B_A | V7B_A  | E18B_A | K17B_A | 4.9E-06 | 1.3E-05 | 7.570E-06 | 1.961E-06 |
| 8759 | Y10B_A | S8B_A  | V7B_A  | Q14B_A | 5.3E-06 | 1.2E-05 | 7.575E-06 | 1.652E-06 |
| 8760 | G13B_A | Y10B_A | V7B_A  | K17B_A | 4.0E-06 | 1.2E-05 | 7.580E-06 | 1.840E-06 |
| 8761 | Y10B_A | T4B_A  | T2B_A  | G1B_A  | 5.3E-06 | 1.6E-05 | 7.605E-06 | 2.490E-06 |
| 8762 | Y10B_A | L11B_A | T4B_A  | Q14B_A | 4.8E-06 | 1.1E-05 | 7.615E-06 | 1.601E-06 |
| 8763 | S8B_A  | D6B_A  | F3B_A  | K17B_A | 5.4E-06 | 1.1E-05 | 7.620E-06 | 1.652E-06 |
| 8764 | Y10B_A | F19B_A | Q14B_A | T2B_A  | 4.3E-06 | 1.5E-05 | 7.625E-06 | 2.309E-06 |
| 8765 | Y10B_A | S5B_A  | F19B_A | T2B_A  | 2.9E-06 | 1.3E-05 | 7.650E-06 | 2.548E-06 |
| 8766 | Y10B_A | L11B_A | E18B_A | K17B_A | 5.1E-06 | 9.7E-06 | 7.650E-06 | 1.345E-06 |
| 8767 | G13B_A | Y10B_A | S8B_A  | T2B_A  | 4.8E-06 | 1.3E-05 | 7.665E-06 | 1.712E-06 |
| 8768 | Y10B_A | S5B_A  | T4B_A  | G1B_A  | 5.6E-06 | 1.2E-05 | 7.670E-06 | 1.402E-06 |
| 8769 | Y10B_A | S8B_A  | E18B_A | T4B_A  | 4.9E-06 | 1.1E-05 | 7.675E-06 | 1.570E-06 |
| 8770 | Y10B_A | V7B_A  | T4B_A  | Q14B_A | 4.8E-06 | 1.3E-05 | 7.680E-06 | 1.907E-06 |
| 8771 | Y10B_A | F3B_A  | S5B_A  | Q14B_A | 4.8E-06 | 1.2E-05 | 7.690E-06 | 1.893E-06 |
| 8772 | G13B_A | Y10B_A | D6B_A  | K17B_A | 5.7E-06 | 1.1E-05 | 7.700E-06 | 1.275E-06 |
| 8773 | S8B_A  | D6B_A  | V7B_A  | K17B_A | 4.4E-06 | 9.8E-06 | 7.710E-06 | 1.489E-06 |
| 8774 | Y10B_A | V7B_A  | S5B_A  | T4B_A  | 5.3E-06 | 1.2E-05 | 7.715E-06 | 1.953E-06 |
| 8775 | G13B_A | S8B_A  | D6B_A  | K17B_A | 5.1E-06 | 9.7E-06 | 7.715E-06 | 1.257E-06 |
| 8776 | Y10B_A | S8B_A  | E18B_A | T2B_A  | 6.0E-06 | 1.1E-05 | 7.720E-06 | 1.326E-06 |
| 8777 | Y10B_A | F3B_A  | S5B_A  | T4B_A  | 5.3E-06 | 1.2E-05 | 7.720E-06 | 1.953E-06 |
| 8778 | G13B_A | S5B_A  | T4B_A  | T2B_A  | 5.3E-06 | 1.3E-05 | 7.720E-06 | 1.960E-06 |
| 8779 | Y10B_A | S5B_A  | T2B_A  | G1B_A  | 3.7E-06 | 1.2E-05 | 7.730E-06 | 1.761E-06 |
| 8780 | Y10B_A | S8B_A  | S5B_A  | G1B_A  | 4.8E-06 | 1.1E-05 | 7.735E-06 | 1.748E-06 |
| 8781 | Y10B_A | E18B_A | K17B_A | F19B_A | 4.9E-06 | 1.3E-05 | 7.740E-06 | 2.504E-06 |
| 8782 | Y10B_A | A16B_N | T4B_A  | Q14B_A | 2.6E-06 | 2.0E-05 | 7.745E-06 | 4.172E-06 |
| 8783 | Y10B_A | S5B_A  | T4B_A  | F19B_A | 4.3E-06 | 1.2E-05 | 7.750E-06 | 2.331E-06 |
| 8784 | G13B_A | Y10B_A | E18B_A | K17B_A | 4.4E-06 | 1.1E-05 | 7.750E-06 | 1.793E-06 |
| 8785 | Y10B_A | S8B_A  | V7B_A  | S5B_A  | 5.6E-06 | 1.1E-05 | 7.765E-06 | 1.227E-06 |
| 8786 | Y10B_A | S8B_A  | A16B_N | T2B_A  | 2.1E-06 | 1.5E-05 | 7.770E-06 | 2.886E-06 |
| 8787 | Y10B_A | S5B_A  | Q14B_A | G1B_A  | 5.3E-06 | 1.2E-05 | 7.775E-06 | 1.765E-06 |

|      |        |        |        |        |         |         |           |           |
|------|--------|--------|--------|--------|---------|---------|-----------|-----------|
| 8788 | Y10B_A | L11B_A | S5B_A  | Q14B_A | 5.6E-06 | 1.1E-05 | 7.785E-06 | 1.419E-06 |
| 8789 | G13B_A | L11B_A | S5B_A  | K17B_A | 4.0E-06 | 1.1E-05 | 7.785E-06 | 2.011E-06 |
| 8790 | S8B_A  | D6B_A  | S5B_A  | T2B_A  | 4.2E-06 | 1.2E-05 | 7.785E-06 | 1.768E-06 |
| 8791 | Y10B_A | S8B_A  | E18B_A | S5B_A  | 5.1E-06 | 1.2E-05 | 7.790E-06 | 1.655E-06 |
| 8792 | Y10B_A | S8B_A  | T2B_A  | G1B_A  | 5.3E-06 | 1.1E-05 | 7.800E-06 | 1.815E-06 |
| 8793 | G13B_A | T4B_A  | Q14B_A | T2B_A  | 4.8E-06 | 1.2E-05 | 7.815E-06 | 1.847E-06 |
| 8794 | Y10B_A | S8B_A  | S5B_A  | F19B_A | 4.7E-06 | 1.5E-05 | 7.830E-06 | 2.230E-06 |
| 8795 | Y10B_A | D6B_A  | T4B_A  | Q14B_A | 4.6E-06 | 1.3E-05 | 7.840E-06 | 1.979E-06 |
| 8796 | Y10B_A | D6B_A  | Q14B_A | T2B_A  | 3.9E-06 | 1.3E-05 | 7.900E-06 | 2.186E-06 |
| 8797 | Y10B_A | S8B_A  | L11B_A | S5B_A  | 5.6E-06 | 1.5E-05 | 7.910E-06 | 2.133E-06 |
| 8798 | Y10B_A | V7B_A  | T4B_A  | T2B_A  | 4.6E-06 | 1.0E-05 | 7.915E-06 | 1.366E-06 |
| 8799 | Y10B_A | D6B_A  | A16B_N | K17B_A | 1.8E-06 | 1.3E-05 | 7.930E-06 | 2.887E-06 |
| 8800 | S8B_A  | D6B_A  | S5B_A  | T4B_A  | 6.0E-06 | 1.3E-05 | 7.950E-06 | 1.560E-06 |
| 8801 | Y10B_A | S8B_A  | L11B_A | T2B_A  | 4.1E-06 | 1.2E-05 | 7.970E-06 | 2.284E-06 |
| 8802 | Y10B_A | Q14B_A | T2B_A  | G1B_A  | 5.6E-06 | 1.3E-05 | 7.970E-06 | 2.049E-06 |
| 8803 | G13B_A | S8B_A  | T4B_A  | T2B_A  | 4.6E-06 | 1.1E-05 | 7.975E-06 | 1.728E-06 |
| 8804 | Y10B_A | S8B_A  | D6B_A  | T2B_A  | 5.1E-06 | 1.7E-05 | 7.980E-06 | 2.781E-06 |
| 8805 | Y10B_A | A16B_N | Q14B_A | T2B_A  | 2.3E-06 | 1.7E-05 | 7.980E-06 | 3.258E-06 |
| 8806 | Y10B_A | V7B_A  | S5B_A  | Q14B_A | 5.3E-06 | 1.2E-05 | 8.005E-06 | 1.993E-06 |
| 8807 | Y10B_A | D6B_A  | S5B_A  | T2B_A  | 3.7E-06 | 1.5E-05 | 8.030E-06 | 2.563E-06 |
| 8808 | Y10B_A | E18B_A | S5B_A  | T2B_A  | 5.2E-06 | 1.1E-05 | 8.080E-06 | 1.352E-06 |
| 8809 | G13B_A | S8B_A  | T4B_A  | Q14B_A | 4.8E-06 | 1.1E-05 | 8.080E-06 | 1.718E-06 |
| 8810 | S8B_A  | D6B_A  | S5B_A  | Q14B_A | 5.1E-06 | 1.1E-05 | 8.080E-06 | 1.663E-06 |
| 8811 | G13B_A | S8B_A  | S5B_A  | T2B_A  | 6.6E-06 | 1.1E-05 | 8.085E-06 | 1.114E-06 |
| 8812 | G13B_A | E18B_A | S5B_A  | K17B_A | 5.1E-06 | 1.3E-05 | 8.095E-06 | 2.357E-06 |
| 8813 | S8B_A  | D6B_A  | E18B_A | K17B_A | 4.4E-06 | 1.4E-05 | 8.100E-06 | 2.052E-06 |
| 8814 | G13B_A | D6B_A  | K17B_A | T2B_A  | 5.1E-06 | 1.6E-05 | 8.130E-06 | 2.477E-06 |
| 8815 | Y10B_A | E18B_A | S5B_A  | Q14B_A | 6.0E-06 | 1.8E-05 | 8.135E-06 | 2.626E-06 |
| 8816 | S8B_A  | D6B_A  | L11B_A | K17B_A | 3.0E-06 | 1.2E-05 | 8.145E-06 | 2.270E-06 |
| 8817 | Y10B_A | D6B_A  | S5B_A  | T4B_A  | 5.1E-06 | 1.1E-05 | 8.170E-06 | 1.783E-06 |
| 8818 | G13B_A | S5B_A  | Q14B_A | T2B_A  | 3.9E-06 | 1.1E-05 | 8.180E-06 | 1.767E-06 |
| 8819 | Y10B_A | G1B_R  | S5B_A  | K17B_A | 6.5E-06 | 1.3E-05 | 8.210E-06 | 1.597E-06 |
| 8820 | G13B_A | E18B_A | K17B_A | T2B_A  | 5.1E-06 | 1.1E-05 | 8.225E-06 | 1.590E-06 |
| 8821 | Y10B_A | A16B_N | K17B_A | F19B_A | 2.7E-06 | 1.4E-05 | 8.235E-06 | 2.942E-06 |
| 8822 | G13B_A | S8B_A  | E18B_A | K17B_A | 5.1E-06 | 1.3E-05 | 8.280E-06 | 1.832E-06 |
| 8823 | Y10B_A | S8B_A  | D6B_A  | Q14B_A | 6.0E-06 | 1.1E-05 | 8.315E-06 | 1.247E-06 |
| 8824 | Y10B_A | S8B_A  | K17B_A | F19B_A | 4.9E-06 | 1.1E-05 | 8.315E-06 | 1.650E-06 |
| 8825 | G13B_A | Y10B_A | K17B_A | T2B_A  | 5.1E-06 | 1.2E-05 | 8.320E-06 | 1.704E-06 |
| 8826 | G13B_A | Y10B_A | S5B_A  | Q14B_A | 4.8E-06 | 1.3E-05 | 8.360E-06 | 2.422E-06 |
| 8827 | Y10B_A | S8B_A  | D6B_A  | T4B_A  | 5.1E-06 | 1.6E-05 | 8.385E-06 | 2.519E-06 |
| 8828 | G13B_A | K17B_A | T4B_A  | Q14B_A | 3.9E-06 | 1.1E-05 | 8.455E-06 | 1.873E-06 |
| 8829 | Y10B_A | E18B_A | T4B_A  | Q14B_A | 5.7E-06 | 1.1E-05 | 8.455E-06 | 1.709E-06 |
| 8830 | Y10B_A | E18B_A | S5B_A  | T4B_A  | 6.0E-06 | 1.2E-05 | 8.460E-06 | 1.677E-06 |
| 8831 | Y10B_A | E18B_A | Q14B_A | T2B_A  | 6.0E-06 | 1.7E-05 | 8.465E-06 | 2.863E-06 |
| 8832 | Y10B_A | G1B_R  | K17B_A | T2B_A  | 5.9E-06 | 1.2E-05 | 8.465E-06 | 1.867E-06 |
| 8833 | Y10B_A | A16B_N | S5B_A  | T4B_A  | 1.8E-06 | 1.9E-05 | 8.530E-06 | 3.603E-06 |
| 8834 | S8B_A  | D6B_A  | T4B_A  | T2B_A  | 6.0E-06 | 1.1E-05 | 8.575E-06 | 1.089E-06 |
| 8835 | Y10B_A | G1B_R  | K17B_A | Q14B_A | 6.1E-06 | 1.1E-05 | 8.625E-06 | 1.422E-06 |
| 8836 | Y10B_A | S8B_A  | A16B_N | S5B_A  | 3.9E-06 | 1.8E-05 | 8.640E-06 | 3.015E-06 |
| 8837 | Y10B_A | G1B_R  | K17B_A | T4B_A  | 5.9E-06 | 1.1E-05 | 8.670E-06 | 1.755E-06 |
| 8838 | Y10B_A | S8B_A  | A16B_N | K17B_A | 2.6E-06 | 1.6E-05 | 8.700E-06 | 3.814E-06 |
| 8839 | Y10B_A | F3B_A  | K17B_A | T2B_A  | 5.4E-06 | 1.6E-05 | 8.735E-06 | 2.169E-06 |

|      |        |        |        |        |         |         |           |           |
|------|--------|--------|--------|--------|---------|---------|-----------|-----------|
| 8840 | Y10B_A | D6B_A  | E18B_A | K17B_A | 6.4E-06 | 1.8E-05 | 8.745E-06 | 2.661E-06 |
| 8841 | Y10B_A | S8B_A  | L11B_A | K17B_A | 6.3E-06 | 1.4E-05 | 8.760E-06 | 1.621E-06 |
| 8842 | Y10B_A | S5B_A  | K17B_A | F19B_A | 5.6E-06 | 1.6E-05 | 8.770E-06 | 2.678E-06 |
| 8843 | Y10B_A | V7B_A  | K17B_A | T4B_A  | 6.3E-06 | 1.2E-05 | 8.770E-06 | 1.560E-06 |
| 8844 | Y10B_A | S8B_A  | F3B_A  | K17B_A | 4.5E-06 | 1.3E-05 | 8.820E-06 | 2.076E-06 |
| 8845 | Y10B_A | V7B_A  | K17B_A | Q14B_A | 6.3E-06 | 1.3E-05 | 8.835E-06 | 1.790E-06 |
| 8846 | Y10B_A | K17B_A | T4B_A  | G1B_A  | 6.3E-06 | 1.2E-05 | 8.860E-06 | 1.677E-06 |
| 8847 | Y10B_A | A16B_N | S5B_A  | Q14B_A | 1.7E-06 | 1.4E-05 | 8.885E-06 | 3.256E-06 |
| 8848 | G13B_A | Y10B_A | S5B_A  | K17B_A | 5.8E-06 | 1.4E-05 | 8.925E-06 | 2.290E-06 |
| 8849 | G13B_A | Y10B_A | T4B_A  | Q14B_A | 4.8E-06 | 1.4E-05 | 8.990E-06 | 2.488E-06 |
| 8850 | Y10B_A | L11B_A | K17B_A | T4B_A  | 6.3E-06 | 1.3E-05 | 9.005E-06 | 1.550E-06 |
| 8851 | Y10B_A | L11B_A | K17B_A | T2B_A  | 6.0E-06 | 1.6E-05 | 9.075E-06 | 2.379E-06 |
| 8852 | Y10B_A | K17B_A | Q14B_A | G1B_A  | 7.4E-06 | 1.4E-05 | 9.095E-06 | 1.747E-06 |
| 8853 | S8B_A  | D6B_A  | K17B_A | T4B_A  | 6.5E-06 | 1.3E-05 | 9.110E-06 | 1.661E-06 |
| 8854 | G13B_A | S8B_A  | S5B_A  | K17B_A | 7.4E-06 | 1.5E-05 | 9.115E-06 | 1.859E-06 |
| 8855 | Y10B_A | S8B_A  | K17B_A | G1B_A  | 5.1E-06 | 1.2E-05 | 9.120E-06 | 1.887E-06 |
| 8856 | G13B_A | K17B_A | Q14B_A | T2B_A  | 6.3E-06 | 1.2E-05 | 9.135E-06 | 1.672E-06 |
| 8857 | Y10B_A | K17B_A | F19B_A | T2B_A  | 4.9E-06 | 1.4E-05 | 9.170E-06 | 2.424E-06 |
| 8858 | Y10B_A | S8B_A  | V7B_A  | K17B_A | 3.9E-06 | 1.9E-05 | 9.220E-06 | 3.382E-06 |
| 8859 | G13B_A | S5B_A  | K17B_A | T2B_A  | 5.4E-06 | 1.5E-05 | 9.225E-06 | 2.280E-06 |
| 8860 | Y10B_A | F3B_A  | K17B_A | T4B_A  | 6.3E-06 | 1.4E-05 | 9.245E-06 | 1.776E-06 |
| 8861 | Y10B_A | A16B_N | S5B_A  | K17B_A | 3.8E-06 | 1.3E-05 | 9.255E-06 | 2.988E-06 |
| 8862 | Y10B_A | K17B_A | T4B_A  | F19B_A | 6.0E-06 | 1.3E-05 | 9.265E-06 | 1.971E-06 |
| 8863 | S8B_A  | D6B_A  | K17B_A | Q14B_A | 6.0E-06 | 1.3E-05 | 9.275E-06 | 1.764E-06 |
| 8864 | G13B_A | K17B_A | T4B_A  | T2B_A  | 7.0E-06 | 1.6E-05 | 9.285E-06 | 2.363E-06 |
| 8865 | Y10B_A | S5B_A  | K17B_A | G1B_A  | 5.4E-06 | 1.6E-05 | 9.290E-06 | 2.699E-06 |
| 8866 | Y10B_A | F3B_A  | S5B_A  | K17B_A | 7.0E-06 | 1.4E-05 | 9.325E-06 | 2.015E-06 |
| 8867 | Y10B_A | S8B_A  | S5B_A  | Q14B_A | 6.6E-06 | 1.3E-05 | 9.365E-06 | 1.500E-06 |
| 8868 | G13B_A | S8B_A  | K17B_A | T2B_A  | 6.7E-06 | 1.4E-05 | 9.370E-06 | 1.838E-06 |
| 8869 | Y10B_A | S8B_A  | G1B_R  | K17B_A | 5.8E-06 | 1.7E-05 | 9.400E-06 | 2.904E-06 |
| 8870 | Y10B_A | D6B_A  | K17B_A | Q14B_A | 5.7E-06 | 1.6E-05 | 9.420E-06 | 2.266E-06 |
| 8871 | G13B_A | S8B_A  | K17B_A | T4B_A  | 6.0E-06 | 1.4E-05 | 9.430E-06 | 2.170E-06 |
| 8872 | Y10B_A | S8B_A  | E18B_A | K17B_A | 5.7E-06 | 1.2E-05 | 9.450E-06 | 1.773E-06 |
| 8873 | Y10B_A | S8B_A  | D6B_A  | K17B_A | 6.7E-06 | 1.1E-05 | 9.460E-06 | 1.341E-06 |
| 8874 | Y10B_A | V7B_A  | K17B_A | T2B_A  | 6.0E-06 | 1.4E-05 | 9.480E-06 | 2.103E-06 |
| 8875 | G13B_A | Y10B_A | S8B_A  | K17B_A | 6.6E-06 | 1.4E-05 | 9.495E-06 | 1.771E-06 |
| 8876 | Y10B_A | L11B_A | K17B_A | Q14B_A | 7.3E-06 | 1.3E-05 | 9.500E-06 | 1.406E-06 |
| 8877 | G13B_A | Y10B_A | K17B_A | T4B_A  | 5.1E-06 | 1.4E-05 | 9.520E-06 | 2.303E-06 |
| 8878 | Y10B_A | L11B_A | S5B_A  | K17B_A | 6.0E-06 | 1.6E-05 | 9.525E-06 | 2.415E-06 |
| 8879 | Y10B_A | E18B_A | K17B_A | Q14B_A | 5.8E-06 | 1.4E-05 | 9.550E-06 | 2.222E-06 |
| 8880 | Y10B_A | T4B_A  | Q14B_A | T2B_A  | 5.7E-06 | 1.3E-05 | 9.575E-06 | 2.068E-06 |
| 8881 | Y10B_A | E18B_A | K17B_A | T4B_A  | 5.7E-06 | 1.3E-05 | 9.605E-06 | 2.290E-06 |
| 8882 | G13B_A | S5B_A  | K17B_A | Q14B_A | 6.6E-06 | 1.6E-05 | 9.625E-06 | 2.613E-06 |
| 8883 | Y10B_A | K17B_A | F19B_A | Q14B_A | 6.0E-06 | 1.6E-05 | 9.675E-06 | 2.736E-06 |
| 8884 | Y10B_A | S8B_A  | Q14B_A | T2B_A  | 7.4E-06 | 1.3E-05 | 9.710E-06 | 1.804E-06 |
| 8885 | G13B_A | S5B_A  | K17B_A | T4B_A  | 6.3E-06 | 1.7E-05 | 9.750E-06 | 2.659E-06 |
| 8886 | G13B_A | Y10B_A | K17B_A | Q14B_A | 6.3E-06 | 1.7E-05 | 9.755E-06 | 2.697E-06 |
| 8887 | Y10B_A | V7B_A  | S5B_A  | K17B_A | 4.3E-06 | 1.5E-05 | 9.785E-06 | 2.281E-06 |
| 8888 | Y10B_A | K17B_A | T2B_A  | G1B_A  | 6.3E-06 | 2.0E-05 | 9.800E-06 | 3.553E-06 |
| 8889 | Y10B_A | F3B_A  | K17B_A | Q14B_A | 7.0E-06 | 1.6E-05 | 9.840E-06 | 2.662E-06 |
| 8890 | S8B_A  | D6B_A  | S5B_A  | K17B_A | 7.9E-06 | 1.3E-05 | 9.870E-06 | 1.482E-06 |
| 8891 | Y10B_A | S8B_A  | T4B_A  | T2B_A  | 6.3E-06 | 1.5E-05 | 9.915E-06 | 2.013E-06 |

|      |        |        |        |        |         |         |           |           |
|------|--------|--------|--------|--------|---------|---------|-----------|-----------|
| 8892 | Y10B_A | S5B_A  | T4B_A  | T2B_A  | 6.3E-06 | 1.5E-05 | 9.965E-06 | 2.358E-06 |
| 8893 | Y10B_A | S8B_A  | T4B_A  | Q14B_A | 6.6E-06 | 1.5E-05 | 9.990E-06 | 2.245E-06 |
| 8894 | Y10B_A | S5B_A  | Q14B_A | T2B_A  | 7.0E-06 | 1.6E-05 | 1.006E-05 | 2.182E-06 |
| 8895 | S8B_A  | D6B_A  | K17B_A | T2B_A  | 5.5E-06 | 1.3E-05 | 1.013E-05 | 1.999E-06 |
| 8896 | Y10B_A | A16B_N | K17B_A | Q14B_A | 2.5E-06 | 1.7E-05 | 1.016E-05 | 3.987E-06 |
| 8897 | Y10B_A | S5B_A  | T4B_A  | Q14B_A | 7.4E-06 | 1.6E-05 | 1.021E-05 | 2.397E-06 |
| 8898 | Y10B_A | S8B_A  | S5B_A  | T4B_A  | 6.2E-06 | 1.9E-05 | 1.032E-05 | 2.624E-06 |
| 8899 | Y10B_A | S8B_A  | S5B_A  | T2B_A  | 6.0E-06 | 1.4E-05 | 1.032E-05 | 2.225E-06 |
| 8900 | Y10B_A | D6B_A  | S5B_A  | K17B_A | 7.9E-06 | 1.6E-05 | 1.041E-05 | 2.242E-06 |
| 8901 | Y10B_A | E18B_A | S5B_A  | K17B_A | 6.7E-06 | 1.5E-05 | 1.052E-05 | 2.433E-06 |
| 8902 | G13B_A | S8B_A  | K17B_A | Q14B_A | 4.8E-06 | 1.7E-05 | 1.060E-05 | 2.747E-06 |
| 8903 | Y10B_A | E18B_A | K17B_A | T2B_A  | 7.9E-06 | 1.6E-05 | 1.119E-05 | 2.323E-06 |
| 8904 | Y10B_A | D6B_A  | K17B_A | T2B_A  | 8.8E-06 | 1.7E-05 | 1.130E-05 | 2.366E-06 |
| 8905 | Y10B_A | D6B_A  | K17B_A | T4B_A  | 7.9E-06 | 1.6E-05 | 1.132E-05 | 1.950E-06 |
| 8906 | Y10B_A | K17B_A | Q14B_A | T2B_A  | 9.7E-06 | 1.8E-05 | 1.167E-05 | 2.018E-06 |
| 8907 | Y10B_A | S8B_A  | K17B_A | T4B_A  | 8.3E-06 | 2.3E-05 | 1.174E-05 | 3.119E-06 |
| 8908 | Y10B_A | K17B_A | T4B_A  | Q14B_A | 7.0E-06 | 1.8E-05 | 1.184E-05 | 2.825E-06 |
| 8909 | Y10B_A | S8B_A  | S5B_A  | K17B_A | 7.9E-06 | 1.8E-05 | 1.209E-05 | 3.014E-06 |
| 8910 | Y10B_A | S5B_A  | K17B_A | T4B_A  | 7.0E-06 | 1.6E-05 | 1.215E-05 | 2.507E-06 |
| 8911 | Y10B_A | S8B_A  | K17B_A | T2B_A  | 7.9E-06 | 1.8E-05 | 1.253E-05 | 2.924E-06 |
| 8912 | Y10B_A | S5B_A  | K17B_A | Q14B_A | 8.3E-06 | 1.8E-05 | 1.288E-05 | 2.618E-06 |
| 8913 | Y10B_A | S8B_A  | K17B_A | Q14B_A | 9.7E-06 | 1.9E-05 | 1.298E-05 | 2.533E-06 |
| 8914 | Y10B_A | K17B_A | T4B_A  | T2B_A  | 9.2E-06 | 2.1E-05 | 1.299E-05 | 3.086E-06 |
| 8915 | Y10B_A | S5B_A  | K17B_A | T2B_A  | 7.9E-06 | 2.3E-05 | 1.313E-05 | 4.067E-06 |

**Table 1.** Computationally designed semaglutide analogues with elevated binding affinity to GLP-1R than native semaglutide. In this table, the binding affinity of semaglutide analogues to GLP-1R is calculated with Prodigy [1,2] at  $K_d$  (37 °C) values, while **Muta1**, **Muta2**, **Muta3** and **Muta4** represent the four site-specific mutations introduced into the backbone of semaglutide, and **Min**, **Max**, **Mean** and **Std** represent the minimum, the maximum, the average and the standard deviation of the  $K_d$  values calculated using Prodigy [1,2] for the semaglutide analogues, each 20 times of homology structural modeling using Modeller [3], respectively. Finally, the two rows with yellow background represent two particular semaglutide-GLP-1R structural models reaching a  $K_d$  of  $3.0 \times 10^{-8}$  M, respectively.

## 1. Ethical statement

No ethical approval is required.

## 2. Declaration of generative AI and AI-assisted technologies in the writing process

During the preparation of this work, the author used OpenAI's ChatGPT in order to improve the readability of the manuscript, and to make it as concise and short as possible. After using this tool, the author reviewed and edited the content as needed and takes full responsibility for the content of the publication.

**Author Contributions:** Conceptualization, W.L.; methodology, W.L.; software, W.L.; validation, W.L.; formal analysis, W.L.; investigation, W.L.; resources, W.L.; data duration, W.L.; writing—original draft preparation, W.L.; writing—review and editing, W.L.; visualization, W.L.; supervision, W.L.; project administration, W.L.; funding acquisition, not applicable.

**Funding:** This research received no external funding.

**Conflicts of Interest:** The author declares no conflict of interest.

1. Vangone, A.; Bonvin, A.M. Contacts-based prediction of binding affinity in protein-protein complexes. *eLife* **2015**, *4*.
2. Xue, L.C.; Rodrigues, J.P.; Kastitis, P.L.; Bonvin, A.M.; Vangone, A. PRODIGY: a web server for predicting the binding affinity of protein-protein complexes. *Bioinformatics* **2016**, p. btw514.
3. Webb, B.; Sali, A. Protein Structure Modeling with MODELLER. In *Methods in Molecular Biology*; Springer US, 2020; pp. 239–255.
